# Supplementary material for: Enrichment of Cysteine S-palmitoylated peptides using Sodium Deoxycholate Acid Precipitation
Source: Research Square preprint supplement (doi:10.21203/rs.3.rs-4969255/v1), 2024-09-05
Supplement: Supplementary file 1 [file 6108d041756cccf202e461c6.xlsx]

## Sheet: Summary
Mouse Organ S-palmitoylated Proteome
	Table S1 - Mouse Organ Tissue S-Palmitoylated proteome
	Table S2 - Mouse Organ Tissue S-Palmitoylated proteome - No disulfide sites
	Table S3 - Organ Cluster Assignments

## Sheet: Table S1
Confidence	Annotated Sequence	Modifications	Qvality PEP	Qvality q-value	# Protein Groups	# Proteins	# Isoforms	# PSMs	Master Protein Accessions	Positions in Master Proteins	Modifications in Master Proteins	Master Protein Descriptions	# Missed Cleavages	Theo. MH+ [Da]	Abundance Ratio: (BAT) / (MIX)	Abundance Ratio: (Brain) / (MIX)	Abundance Ratio: (Heart) / (MIX)	Abundance Ratio: (Kidney) / (MIX)	Abundance Ratio: (Liver) / (MIX)	Abundance Ratio: (WAT) / (MIX)	Abundance Ratio P-Value: (BAT) / (MIX)	Abundance Ratio P-Value: (Brain) / (MIX)	Abundance Ratio P-Value: (Heart) / (MIX)	Abundance Ratio P-Value: (Kidney) / (MIX)	Abundance Ratio P-Value: (Liver) / (MIX)	Abundance Ratio P-Value: (WAT) / (MIX)	Abundance Ratio Adj. P-Value: (BAT) / (MIX)	Abundance Ratio Adj. P-Value: (Brain) / (MIX)	Abundance Ratio Adj. P-Value: (Heart) / (MIX)	Abundance Ratio Adj. P-Value: (Kidney) / (MIX)	Abundance Ratio Adj. P-Value: (Liver) / (MIX)	Abundance Ratio Adj. P-Value: (WAT) / (MIX)	Abundances (Grouped): BAT	Abundances (Grouped): Brain	Abundances (Grouped): Heart	Abundances (Grouped): Kidney	Abundances (Grouped): Liver	Abundances (Grouped): MIX	Abundances (Grouped): WAT	Abundances (Grouped) CV [%]: BAT	Abundances (Grouped) CV [%]: Brain	Abundances (Grouped) CV [%]: Heart	Abundances (Grouped) CV [%]: Kidney	Abundances (Grouped) CV [%]: Liver	Abundances (Grouped) CV [%]: MIX	Abundances (Grouped) CV [%]: WAT	Abundance: F1: 130C, Sample, BAT	Abundance: F1: 131N, Sample, BAT	Abundance: F1: 128C, Sample, Brain
High	[K].SEDTATYYCAR.[-]	1xCarbamidomethyl [C9]; 1xTMTpro [N-Term]	0.000547873	2.82963e-05	1	1	1	1	A0A075B5R0	A0A075B5R0 [106-116]	A0A075B5R0 1xCarbamidomethyl [C114]	Immunoglobulin heavy variable 5-16 OS=Mus musculus OX=10090 GN=Ighv5-16 PE=1 SV=1	0	1640.75	2.101	0.106	0.497	0.625	0.465	10.063	0.0931641	0.000851967	0.488003	0.615249	0.348358	0.029434	0.744713	0.158673	0.999091	1	0.988847	0.577115	844.5	42.4	200	251.2	186.8	402	4045.8	28.87	7.44	35.2	108.11	22.4		9.4	342.2	417.2	35.7
High	[R].AEDSATYYCAR.[Y]	1xCarbamidomethyl [C9]; 1xTMTpro [N-Term]	0.000849284	5.93436e-05	1	1	1	1	A0A075B5R2	A0A075B5R2 [109-119]	A0A075B5R2 1xCarbamidomethyl [C117]	Immunoglobulin heavy variable 7-3 (Fragment) OS=Mus musculus OX=10090 GN=Ighv7-3 PE=1 SV=2	0	1610.74	1.214	0.117	0.288	0.492	1.129	8.915	0.508998	0.011807	0.199892	0.270017	0.731826	0.69795	0.996109	0.540235	0.915236	0.915407	0.99991	0.995093	1083.4	104.8	257.1	439	1007.6	892.6	7957.3	20.07	12.67	27.44	75.3	80.51		17.26	411.7	570.7	85
High	[K].LSCAASGIDFSR.[Y]	1xCarbamidomethyl [C3]; 1xTMTpro [N-Term]	0.000137883	2.82963e-05	1	1	1	1	A0A075B5R5	A0A075B5R5 [38-49]	A0A075B5R5 1xCarbamidomethyl [C40]	Immunoglobulin heavy variable 4-1 (Fragment) OS=Mus musculus OX=10090 GN=Ighv4-1 PE=1 SV=7	0	1587.81	2.135	0.533	0.89	0.951	1.033	7.888	0.168195	0.597266	0.797456	0.970361	0.88428	0.342082	0.884488	0.999952	0.999996	1	0.999916	0.994122	1681.2	419.8	701	749	813.5	787.3	6210.4	6.24	4.49	2.93	3.46	22.76		1.45	529.9	1067.7	384.4
High	[K].NEDTATYFCAR.[-]	1xCarbamidomethyl [C9]; 1xTMTpro [N-Term]	0.0309271	0.00221092	1	3	1	1	A0A075B5S9	A0A075B5S9 [88-98]	A0A075B5S9 1xCarbamidomethyl [C96]	Immunoglobulin heavy variable 9-4 OS=Mus musculus OX=10090 GN=Ighv9-4 PE=1 SV=1	0	1651.77	2.615	0.517	0.564	0.532	0.711	16.054	0.0410794	0.340523	0.556707	0.431665	0.851788	0.0837933	0.525302	0.991935	0.999526	0.991746	0.99991	0.824038	944	186.6	203.4	192	256.5	361	5795.1	41.3	5.06	13.5	0.61	13.99		5.32	420.1	424.6	171.6
High	[K].SSSTAYMELNSLTSEDSAVYYCAR.[-]	1xCarbamidomethyl [C22]; 1xTMTpro [N-Term]	0.0744461	0.00498168	1	1	1	1	A0A075B5U5	A0A075B5U5 [93-116]	A0A075B5U5 1xCarbamidomethyl [C114]	Immunoglobulin heavy variable V1-19 OS=Mus musculus OX=10090 GN=Ighv1-19 PE=1 SV=1	0	3009.38	1.453	1.787	1.504	1.87	1.047	3.997	0.271733	0.313563	0.295507	0.134452	0.736211	0.0080441	0.965783	0.989613	0.96934	0.731269	0.99991	0.304919	44.2	54.4	45.8	56.9	31.8	30.4	121.6	7.9	2.47	3.55	24.4	9.69		21.01	15.4	25.4	47.4
High	[R].LTSEDSAVYFCAR.[H]	1xCarbamidomethyl [C11]; 1xTMTpro [N-Term]	1.39163e-05	2.82963e-05	1	1	1	1	A0A075B680	A0A075B680 [86-98]	A0A075B680 1xCarbamidomethyl [C96]	Immunoglobulin heavy variable 1-62-2 OS=Mus musculus OX=10090 GN=Ighv1-62-2 PE=1 SV=1	0	1822.9	2.476	0.361	0.82	1.249	0.774	9.496	0.0879738	0.325556	0.844565	0.661704	0.941971	0.291863	0.723644	0.989785	0.999996	1	0.99999	0.994122	1701.5	248	563.4	858.2	531.9	687.2	6525.9	49.78	2.68	81.73	50.18	64.9		20.15	809.6	715.8	224.2
High	[R].INCEGTIPR.[D]	1xCarbamidomethyl [C3]; 1xTMTpro [N-Term]	0.084621	0.00565615	1	1	1	1	A0A087WRT4	A0A087WRT4 [573-581]	A0A087WRT4 1xCarbamidomethyl [C575]	FAT atypical cadherin 1 OS=Mus musculus OX=10090 GN=Fat1 PE=1 SV=2	0	1363.73	0.914	1.637	0.981	1.28	0.967	1.426	0.793921	0.342623	0.679272	0.474075	0.852801	0.337416	0.999984	0.992745	0.999996	1	0.99991	0.994122	185.9	333.1	199.6	260.5	196.8	203.5	290.2	18.57	5.95	3.1	2.39	8.04		8.05	69.9	99	283.3
High	[K].AEEYVLGDFCFLR.[I]	1xCarbamidomethyl [C10]; 1xTMTpro [N-Term]	0.00361117	0.000263321	1	1	1	1	A0A087WRT4	A0A087WRT4 [86-98]	A0A087WRT4 1xCarbamidomethyl [C95]	FAT atypical cadherin 1 OS=Mus musculus OX=10090 GN=Fat1 PE=1 SV=2	0	1922.96	1.005	1.688	1.141	1.473	1.229	2.151	0.658957	0.33737	0.53412	0.372405	0.573604	0.180679	0.996109	0.991347	0.999526	0.971935	0.99991	0.949346	196.4	329.8	222.9	287.8	240.1	195.3	420.3	25.82	3.8	4.59	11.31	0.1		2.21	77.8	99.2	284.8
High	[R].SLTSEDSAVYYCTR.[-]	1xCarbamidomethyl [C12]; 1xTMTpro [N-Term]	1.54777e-05	2.82963e-05	1	2	1	2	A0A0A6YVW3	A0A0A6YVW3 [104-117]	A0A0A6YVW3 1xCarbamidomethyl [C115]	Immunoglobulin heavy variable V1-23 (Fragment) OS=Mus musculus OX=10090 GN=Ighv1-23 PE=4 SV=1	0	1955.93	1.749	0.471	0.683	0.775	0.523	21.128	0.160117	0.491202	0.969057	0.765058	0.506095	0.514969	0.873808	0.999596	0.999996	1	0.99991	0.994122	801.2	215.9	312.7	354.7	239.4	458	9676.6	35.78	6.71	9.8	20.53	15.13		32.44	341.8	375.9	182.6
High	[K].CTVTHPESDTLTGTIAK.[I]	1xCarbamidomethyl [C1]; 1xTMTpro [K17]; 1xTMTpro [N-Term]	1.58619e-07	2.82963e-05	1	1	1	1	A0A0A6YXW6	A0A0A6YXW6 [195-211]	A0A0A6YXW6 1xCarbamidomethyl [C195]	Immunoglobulin heavy constant alpha (Fragment) OS=Mus musculus OX=10090 GN=Igha PE=1 SV=1	0	2439.3	0.693	0.166	0.346	0.25	2.708	6.741	0.883326	0.0302494	0.263902	0.0943588	0.125608	0.21203	0.999984	0.685313	0.956181	0.630609	0.79312	0.968746	477.2	114.2	237.9	172.2	1863.9	688.2	4639.3	40.96	4.42	35.46	37.6	2.02		14.87	211.8	215.2	104.5
High	[R].SQIICEVDHVTLDR.[A]	1xCarbamidomethyl [C5]; 1xTMTpro [N-Term]	0.000112334	2.82963e-05	1	3	1	1	A0A0A6YYP6	A0A0A6YYP6 [222-235]	A0A0A6YYP6 1xCarbamidomethyl [C226]	Signal-regulatory protein beta 1A OS=Mus musculus OX=10090 GN=Sirpb1a PE=4 SV=1	0	1989.04	1.222	0.791	0.885	1.208	0.833	3.667	0.45671	0.793559	0.8458	0.606297	0.97274	0.0759897	0.996109	0.999952	0.999996	1	0.99999	0.803018	159.4	103.1	115.5	157.5	108.7	130.4	478.3	3.34	6.67	9.89	7.38	12.85		1.46	51.3	99.2	95.9
High	[K].TEDTAMYYCVR.[-]	1xCarbamidomethyl [C9]; 1xTMTpro [N-Term]	0.00454476	0.000288586	1	2	1	1	A0A0B4J1J6	A0A0B4J1J6 [109-119]	A0A0B4J1J6 1xCarbamidomethyl [C117]	Immunoglobulin heavy variable 10-1 (Fragment) OS=Mus musculus OX=10090 GN=Ighv10-1 PE=1 SV=1	0	1712.79	2.706	0.388	0.459	0.562	0.5	12.413	0.0728621	0.320915	0.473116	0.441003	0.490659	0.217584	0.678506	0.989785	0.999091	0.995773	0.99991	0.972712	1433	205.5	243	297.7	264.8	529.6	6573.6	3.71	8.58	4.97	11.55	20.16		5.95	459.8	893.9	193.7
High	[R].MQASNSCR.[E]	1xCarbamidomethyl [C7]; 1xTMTpro [N-Term]	0.000160482	2.82963e-05	1	1	1	1	A0A0G2JDV3	A0A0G2JDV3 [212-219]	A0A0G2JDV3 1xCarbamidomethyl [C218]	Guanylate-binding protein 6 OS=Mus musculus OX=10090 GN=Gbp6 PE=2 SV=2	0	1257.6	0.483	0.211	1.809	0.803	1.936	0.26	0.567642	0.0132952	0.193292	0.807577	0.25016	0.279477	0.996109	0.563434	0.908826	1	0.953953	0.994122	215.4	94.1	806.4	357.8	862.9	445.7	115.8	12.12	8.85	4.41	42.3	18.14		0.99	65.1	142.6	88.9
High	[K].SYLMNCLAGQNHGFPLGSTVQSQTK.[G]	1xCarbamidomethyl [C6]; 1xTMTpro [K25]; 1xTMTpro [N-Term]	1.74187e-10	2.82963e-05	1	1	1	2	A0A0G2JDV3	A0A0G2JDV3 [50-74]	A0A0G2JDV3 1xCarbamidomethyl [C55]	Guanylate-binding protein 6 OS=Mus musculus OX=10090 GN=Gbp6 PE=2 SV=2	0	3346.72	1.271	0.481	1.034	0.796	1.285	1.207	0.865491	0.505139	0.927419	0.566842	0.997559	0.70236	0.999984	0.999596	0.999996	1	0.99999	0.995093	2446	925.9	1990	1532.5	2473.8	1924.8	2324.1	12.58	7.22	9.35	19.39	12.61		3.03	737	1624.9	864.4
High	[R].LQEESDCVTHYTR.[S]	1xCarbamidomethyl [C7]; 1xTMTpro [N-Term]	0.000144307	2.82963e-05	1	1	1	1	A0A0N4SUJ3	A0A0N4SUJ3 [100-112]	A0A0N4SUJ3 1xCarbamidomethyl [C106]	N-acetylated alpha-linked acidic dipeptidase-like 2 OS=Mus musculus OX=10090 GN=Naaladl2 PE=1 SV=1	0	1941.93	0.706	1.13	0.792	1.962	1.657	0.691	0.878178	0.736486	0.908785	0.21593	0.295645	0.974164	0.999984	0.999952	0.999996	0.860194	0.979593	0.999948	188.8	302	211.7	524.3	443	267.3	184.8	0.5	0.66	17.11	13.9	18.29		8.16	62.4	114.3	266.6
High	[R].GQSPSCQPR.[S]	1xCarbamidomethyl [C6]; 1xTMTpro [N-Term]	0.108383	0.0066289	1	1	1	1	A0A140LIW3	A0A140LIW3 [1167-1175]	A0A140LIW3 1xCarbamidomethyl [C1172]	FERM and PDZ domain containing 3 OS=Mus musculus OX=10090 GN=Frmpd3 PE=1 SV=1	0	1320.66	0.186	6.512	0.78	0.247	0.402	0.267	0.0113398	0.00304233	0.806064	0.0365472	0.226866	0.145333	0.25585	0.299831	0.999996	0.391473	0.938312	0.918344	14.8	518.3	62.1	19.7	32	79.6	21.3	21.33	7.89	37.9	24.78	6.5			4.2	10.5	434.8
High	[R].EFVPWCKK.[S]	1xCarbamidomethyl [C6]; 2xTMTpro [K7; K8]; 1xTMTpro [N-Term]	0.00579897	0.000397541	1	1	1	1	A0A1W2P7J1	A0A1W2P7J1 [114-121]	A0A1W2P7J1 1xCarbamidomethyl [C119]	Coenzyme Q10A OS=Mus musculus OX=10090 GN=Coq10a PE=1 SV=1	1	2006.17	1.355	0.382	2.107	0.572	0.411	0.789	0.699879	0.380272	0.654158	0.335518	0.252942	0.972822	0.999058	0.998768	0.999996	0.953199	0.956422	0.999948	2237	630.1	3478.5	944.4	678.2	1650.9	1303.4	12.33	7.98	16.88	1.52	5.45		2.83	675.2	1483.5	591.4
High	[K].AVCTDGK.[L]	1xCarbamidomethyl [C3]; 1xTMTpro [K7]; 1xTMTpro [N-Term]	0.150614	0.00851843	1	1	1	1	A0A1W2P7J1	A0A1W2P7J1 [161-167]	A0A1W2P7J1 1xCarbamidomethyl [C163]	Coenzyme Q10A OS=Mus musculus OX=10090 GN=Coq10a PE=1 SV=1	0	1358.76	1.553	1.15	0.865	0.743	0.76	20.125	0.204789	0.672859	0.84157	0.620024	0.78358	0.0606491	0.922684	0.999952	0.999996	1	0.99991	0.762274	430.7	318.9	239.8	206.1	210.7	277.3	5581.1	14.1	5.7	2.23	2.97	24.65		6.27	156.8	236.8	294.5
High	[K].AVCTDGKLFNHLETIWR.[F]	1xCarbamidomethyl [C3]; 1xTMTpro [K7]; 1xTMTpro [N-Term]	0.000251074	2.82963e-05	1	1	1	1	A0A1W2P7J1	A0A1W2P7J1 [161-177]	A0A1W2P7J1 1xCarbamidomethyl [C163]	Coenzyme Q10A OS=Mus musculus OX=10090 GN=Coq10a PE=1 SV=1	1	2668.45	0.98	0.709	3.013	0.645	0.502	0.564	0.557464	0.794254	0.048483	0.712328	0.500038	0.857556	0.996109	0.999952	0.624349	1	0.99991	0.998045	416.7	301.3	1280.6	274	213.6	425.1	239.7	10.85	11.52	0.71	6.55	2.1		29.97	127.1	273.4	290
High	[K].AEASWDSAVHSCPQLSK.[G]	1xCarbamidomethyl [C12]; 1xTMTpro [K17]; 1xTMTpro [N-Term]	5.81447e-07	2.82963e-05	1	1	1	2	A0A286YCV9	A0A286YCV9 [1222-1238]	A0A286YCV9 1xCarbamidomethyl [C1233]	Kinesin family member 13B OS=Mus musculus OX=10090 GN=Kif13b PE=1 SV=1	0	2481.27	0.716	0.408	0.442	1.413	2.449	0.72	0.907852	0.414757	0.53595	0.494461	0.215159	0.832137	0.999984	0.999596	0.999526	1	0.92688	0.997925	564	320.9	347.7	1112.4	1928.5	787.3	567.1	16.53	2.47	12.26	13.98	5.23		17.44	165.2	385.4	279.7
High	[R].LCSGLFER.[T]	1xCarbamidomethyl [C2]; 1xTMTpro [N-Term]	0.075459	0.00500047	1	1	1	2	A0A286YCV9	A0A286YCV9 [126-133]	A0A286YCV9 1xCarbamidomethyl [C127]	Kinesin family member 13B OS=Mus musculus OX=10090 GN=Kif13b PE=1 SV=1	0	1285.69	0.456	0.483	0.69	1.083	2.863	0.754	0.444955	0.514543	0.949028	0.992167	0.310912	0.867225	0.996109	0.999725	0.999996	1	0.98144	0.998045	527.5	558.6	798.6	1252.8	3312.7	1157.2	872.3	7.85	0.4	16.38	10.39	2.68		11.17	183.7	303.2	496.9
High	[R].SSIPGCGVTFEIVSNIPEDAQGVEER.[E]	1xCarbamidomethyl [C6]; 1xTMTpro [N-Term]	1.74778e-05	2.82963e-05	1	1	1	2	A0A286YCV9	A0A286YCV9 [1292-1317]	A0A286YCV9 1xCarbamidomethyl [C1297]	Kinesin family member 13B OS=Mus musculus OX=10090 GN=Kif13b PE=1 SV=1	0	3094.53	0.921	0.73	0.793	1.319	2.043	1.585	0.631071	0.90348	0.864642	0.511821	0.192731	0.270649	0.996109	0.999952	0.999996	1	0.907753	0.994122	406.5	322.3	349.9	582.4	901.6	441.4	699.6	7.89	3.04	9.27	10.12	1.13		1.35	141.6	233.6	279.8
High	[K].CVVDVEANK.[V]	1xCarbamidomethyl [C1]; 1xTMTpro [K9]; 1xTMTpro [N-Term]	0.0111141	0.000684031	1	1	1	2	A0A286YCV9	A0A286YCV9 [26-34]	A0A286YCV9 1xCarbamidomethyl [C26]	Kinesin family member 13B OS=Mus musculus OX=10090 GN=Kif13b PE=1 SV=1	0	1641.91	0.469	0.411	0.28	0.611	1.837	0.722	0.400293	0.421034	0.20201	0.314414	0.662667	0.961434	0.996109	0.999596	0.917867	0.943749	0.99991	0.999948	717.5	629.5	428.3	935.5	2811.7	1530.2	1104.1	19.49	9.51	0.76	8.14	11.59		5.36	271.5	379.5	597.3
High	[R].DLYQEWKECEEDSPVSR.[S]	1xCarbamidomethyl [C9]; 1xTMTpro [K7]; 1xTMTpro [N-Term]	0.00168517	9.06176e-05	1	1	1	1	A0A286YCV9	A0A286YCV9 [765-781]	A0A286YCV9 1xCarbamidomethyl [C773]	Kinesin family member 13B OS=Mus musculus OX=10090 GN=Kif13b PE=1 SV=1	1	2778.35	0.749	0.267	0.366	0.78	1.681	0.883	0.964592	0.199141	0.257015	0.669545	0.6341	0.741278	0.999984	0.946777	0.951538	1	0.99991	0.995093	859	306.6	419.4	895.2	1928	1147.3	1013.4	2.51	11.28	4.42	5	5.07		16.46	278	531.3	294.6
High	[R].IAGGDDPTEVSSEKEAQENRLVCMVK.[I]	1xCarbamidomethyl [C23]; 2xTMTpro [K14; K26]; 1xTMTpro [N-Term]	0.000467364	2.82963e-05	1	1	1	1	A0A286YCV9	A0A286YCV9 [848-873]	A0A286YCV9 1xCarbamidomethyl [C870]	Kinesin family member 13B OS=Mus musculus OX=10090 GN=Kif13b PE=1 SV=1	2	3774.98	0.847	0.693	0.809	0.891	1.517	1.169	0.786825	0.890424	0.853885	0.937236	0.389884	0.372636	0.999984	0.999952	0.999996	1	0.993437	0.994122	376.4	308.3	359.5	396	674.6	444.6	519.8	9.06	5.08	1.78	2.13	30.54		2.22	116.3	243.9	283.5
High	[R].HTAVICTSR.[S]	1xCarbamidomethyl [C6]; 1xTMTpro [N-Term]	0.0110339	0.000684031	1	1	1	1	A0A286YCX6	A0A286YCX6 [1069-1077]	A0A286YCX6 1xCarbamidomethyl [C1074]	Trafficking protein particle complex 8 OS=Mus musculus OX=10090 GN=Trappc8 PE=1 SV=2	0	1348.73	1.079	0.922	0.295	1.183	1.299	0.489	0.627442	0.815243	0.171295	0.747385	0.619064	0.691664	0.996109	0.999952	0.884875	1	0.99991	0.995093	772.2	659.9	211.3	846.2	929.1	715.4	349.9	2.81	2.01	5.42	18.87	10.62		15.86	259.5	460	577.1
High	[K].YGTQGCYLLK.[I]	1xCarbamidomethyl [C6]; 1xTMTpro [K10]; 1xTMTpro [N-Term]	0.000888628	5.93436e-05	1	1	1	1	A0A286YCX6	A0A286YCX6 [218-227]	A0A286YCX6 1xCarbamidomethyl [C223]	Trafficking protein particle complex 8 OS=Mus musculus OX=10090 GN=Trappc8 PE=1 SV=2	0	1811	0.723	0.831	0.791	0.971	0.894	1.111	0.835082	0.860546	0.965411	0.933722	0.856208	0.654993	0.999984	0.999952	0.999996	1	0.999916	0.995093	935	1073.6	1022.7	1254.6	1155.8	1292.6	1436.6	4.01	4.82	0.75	1.13	3.35		13.5	299.4	584.5	985.4
High	[R].GACLTLTDHDR.[I]	1xCarbamidomethyl [C3]; 1xTMTpro [N-Term]	0.00397717	0.000263321	1	1	1	2	A0A286YCX6	A0A286YCX6 [337-347]	A0A286YCX6 1xCarbamidomethyl [C339]	Trafficking protein particle complex 8 OS=Mus musculus OX=10090 GN=Trappc8 PE=1 SV=2	0	1562.79	0.698	2.181	0.715	1.637	1.147	0.685	0.999224	0.181087	0.981064	0.36635	0.681178	0.905107	0.999984	0.934585	0.999996	0.969438	0.99991	0.998552	259.6	811.4	266	609.1	426.8	372.1	254.8	1.33	0.57	9.1	27.91	9.18		1.3	84.7	159.2	722.7
High	[R].SALLLEQAAHCFINMK.[S]	1xCarbamidomethyl [C11]; 1xTMTpro [K16]; 1xTMTpro [N-Term]	0.000283458	2.82963e-05	1	1	1	1	A0A286YCX6	A0A286YCX6 [538-553]	A0A286YCX6 1xCarbamidomethyl [C548]	Trafficking protein particle complex 8 OS=Mus musculus OX=10090 GN=Trappc8 PE=1 SV=2	0	2454.35	1.315	0.928	0.914	0.926	1.071	1.542	0.392602	0.90786	0.730115	0.93387	0.827485	0.322092	0.996089	0.999952	0.999996	1	0.99991	0.994122	1010.1	712.5	702.3	711.6	822.9	768.1	1184.5	4.37	2.65	3.93	0.17	1.18		10.34	343.2	595.1	620.3
High	[R].MASNLDCQMSHK.[F]	1xCarbamidomethyl [C7]; 1xTMTpro [K12]; 1xTMTpro [N-Term]	0.0304989	0.00213783	1	1	1	1	A0A2R8VKG2	A0A2R8VKG2 [1066-1077]	A0A2R8VKG2 1xCarbamidomethyl [C1072]	RIKEN cDNA D430041D05 gene OS=Mus musculus OX=10090 GN=D430041D05Rik PE=1 SV=1	0	2030.01	0.885	1.751	0.868	0.643	0.748	2.228	0.836078	0.323169	0.920948	0.533436	0.855637	0.153512	0.999984	0.989785	0.999996	1	0.999916	0.92848	185.4	366.8	182	134.8	156.8	209.5	466.9	11.57	2.06	18.39	3.04	1.78		6.92	66.3	103.8	320.7
High	[K].TVLQFVSQSDNIQSCR.[F]	1xCarbamidomethyl [C15]; 1xTMTpro [N-Term]	4.79945e-05	2.82963e-05	1	1	1	2	A0A2R8VKG2	A0A2R8VKG2 [1194-1209]	A0A2R8VKG2 1xCarbamidomethyl [C1208]	RIKEN cDNA D430041D05 gene OS=Mus musculus OX=10090 GN=D430041D05Rik PE=1 SV=1	0	2186.12	1.068	1.934	1.083	0.927	0.827	1.987	0.567763	0.345254	0.542975	0.998248	0.925707	0.188312	0.996109	0.993373	0.999526	1	0.99999	0.954967	722.5	1308.3	732.5	627.4	559.5	676.5	1344.1	0.17	0.67	9.56	0.8	3.18		12.98	238.3	438.5	1166.1
High	[R].GHGEDHCQFVDSFLDGR.[T]	1xCarbamidomethyl [C7]; 1xTMTpro [N-Term]	0.00062778	2.82963e-05	1	1	1	1	A0A338P6S8	A0A338P6S8 [1569-1585]	A0A338P6S8 1xCarbamidomethyl [C1575]	ABI family member 3 binding protein OS=Mus musculus OX=10090 GN=Abi3bp PE=1 SV=1	0	2280.04	1.494	2.737	2.271	1.562	1.215	1.785	0.201399	0.0552605	0.091456	0.259956	0.532842	0.207044	0.920639	0.763178	0.756732	0.907119	0.99991	0.96743	136.4	249.8	207.3	142.6	110.9	91.3	162.9	8.75	5.81	18.82	8.87	9.8		9.72	47.8	77.9	212.7
High	[R].MFSNQGVCTLEIR.[K]	1xCarbamidomethyl [C8]; 1xTMTpro [N-Term]	1.46762e-05	2.82963e-05	1	1	1	3	A0A571BEN1	A0A571BEN1 [1064-1076]	A0A571BEN1 1xCarbamidomethyl [C1071]	Myosin binding protein C, slow-type OS=Mus musculus OX=10090 GN=Mybpc1 PE=1 SV=1	0	1858.95	8.22	0.306	0.327	0.232	0.342	1.015	0.179137	0.278107	0.257195	0.0179016	0.101519	0.718393	0.894202	0.975559	0.951538	0.254164	0.740202	0.995093	10067.9	374.6	400.3	284	419.1	1224.8	1243.6	28.76	3.59	0.9	3.88	3.61		33.89	4076	4977.7	340.8
High	[K].AVNDLGTVEIECK.[L]	1xCarbamidomethyl [C12]; 1xTMTpro [K13]; 1xTMTpro [N-Term]	0.000177119	2.82963e-05	1	1	1	2	A0A571BEN1	A0A571BEN1 [1090-1102]	A0A571BEN1 1xCarbamidomethyl [C1101]	Myosin binding protein C, slow-type OS=Mus musculus OX=10090 GN=Mybpc1 PE=1 SV=1	0	2056.12	6.936	0.524	0.321	0.354	0.963	1.859	0.175991	0.578645	0.209206	0.103827	0.929297	0.303343	0.891629	0.999952	0.920856	0.660507	0.99999	0.994122	6815.6	515.4	315.2	348.4	945.9	982.7	1827.3	37.63	4.39	0.85	5.58	15.31		6.79	2948.8	3153.2	471.6
High	[K].AVNDLGTVEIECKLEVK.[G]	1xCarbamidomethyl [C12]; 2xTMTpro [K13; K17]; 1xTMTpro [N-Term]	6.2259e-07	2.82963e-05	1	1	1	2	A0A571BEN1	A0A571BEN1 [1090-1106]	A0A571BEN1 1xCarbamidomethyl [C1101]	Myosin binding protein C, slow-type OS=Mus musculus OX=10090 GN=Mybpc1 PE=1 SV=1	1	2829.62	7.443	0.346	0.975	0.357	0.541	1.112	0.211909	0.292369	0.759153	0.0965355	0.503791	0.658635	0.929887	0.980953	0.999996	0.635994	0.99991	0.995093	9152.2	425.9	1199.5	439.3	664.8	1229.7	1367.9	48.23	8.59	37.73	17.43	1		0.81	4300.8	3898.4	355.5
High	[K].DKFDSCSFDLEVHESTGTTPNIDIR.[S]	1xCarbamidomethyl [C6]; 1xTMTpro [K2]; 1xTMTpro [N-Term]	1.70841e-05	2.82963e-05	1	1	1	1	A0A571BEN1	A0A571BEN1 [135-159]	A0A571BEN1 1xCarbamidomethyl [C140]	Myosin binding protein C, slow-type OS=Mus musculus OX=10090 GN=Mybpc1 PE=1 SV=1	1	3491.72	7.765	0.242	0.288	0.21	0.306	2.289	0.00116839	0.019849	0.0600961	0.00494728	0.0601925	0.109326	0.0635906	0.618038	0.67007	0.105424	0.604929	0.868689	2080.2	64.8	77.1	56.3	82.1	267.9	613.1	30.83	15.72	21.18	2.43	1.3		6.05	855.2	1012.8	51.4
High	[K].CSTELFVR.[E]	1xCarbamidomethyl [C1]; 1xTMTpro [N-Term]	0.144845	0.00835224	1	1	1	1	A0A571BEN1	A0A571BEN1 [318-325]	A0A571BEN1 1xCarbamidomethyl [C318]	Myosin binding protein C, slow-type OS=Mus musculus OX=10090 GN=Mybpc1 PE=1 SV=1	0	1315.7	8.468	0.481	0.926	0.43	0.422	1.115	1.89738e-05	0.178739	0.870039	0.218369	0.233558	0.546344	0.00304148	0.932436	0.999996	0.864412	0.942377	0.994655	1184.2	67.3	129.6	60.1	59.1	139.9	156	37.81	6.82	2.13	14.12	3.36		10.94	513.1	547.1	56.9
High	[R].LNFDLCKETTFEPK.[K]	1xCarbamidomethyl [C6]; 2xTMTpro [K7; K14]; 1xTMTpro [N-Term]	0.000254911	2.82963e-05	1	1	1	3	A0A571BEN1	A0A571BEN1 [656-669]	A0A571BEN1 1xCarbamidomethyl [C661]	Myosin binding protein C, slow-type OS=Mus musculus OX=10090 GN=Mybpc1 PE=1 SV=1	1	2654.47	5.947	0.349	0.497	0.314	0.427	1.112	0.301332	0.144903	0.170338	0.0390958	0.122489	0.294098	0.975379	0.902369	0.884188	0.405429	0.787587	0.994122	27070.3	1588.1	2261.5	1429.6	1942.5	4552.1	5063.6	26.91	2.39	1.51	0.73	9.29		38.37	10811.4	13567.1	1432.8
High	[R].VFAENMCGLSEDATMTK.[E]	1xCarbamidomethyl [C7]; 1xTMTpro [K17]; 1xTMTpro [N-Term]	3.33943e-07	2.82963e-05	1	1	1	2	A0A571BEN1	A0A571BEN1 [974-990]	A0A571BEN1 1xCarbamidomethyl [C980]	Myosin binding protein C, slow-type OS=Mus musculus OX=10090 GN=Mybpc1 PE=1 SV=1	0	2512.24	7.587	0.34	0.453	0.381	0.504	1.536	0.129017	0.241477	0.547191	0.19004	0.499672	0.319636	0.827371	0.965203	0.999526	0.827399	0.99991	0.994122	5945.2	266.3	355.2	298.7	394.7	783.6	1203.6	20.97	4.52	9.74	1.25	0.2		1.79	2274	3111.2	228.8
High	[R].NYLHQWTCLPDQNDVIQAK.[K]	1xCarbamidomethyl [C8]; 1xTMTpro [K19]; 1xTMTpro [N-Term]	4.62063e-05	2.82963e-05	1	1	1	1	A0A571BF58	A0A571BF58 [2378-2396]; [4322-4340]	A0A571BF58 1xCarbamidomethyl [C2385]; 1xCarbamidomethyl [C4329]	Nebulin OS=Mus musculus OX=10090 GN=Neb PE=1 SV=1	0	2951.53	3.833	0.722	0.769	0.632	0.966	3.063	0.0174806	0.892127	0.939248	0.540118	0.781799	0.0510822	0.332784	0.999952	0.999996	1	0.99991	0.724779	1407.3	265.2	282.5	231.9	354.6	367.2	1124.8	64.19	7.86	5.04	4.97	1.9		19.42	756.4	524.1	248.7
High	[R].NYLHQWTCLPDQNDVIHAR.[Q]	1xCarbamidomethyl [C8]; 1xTMTpro [N-Term]	2.31495e-05	2.82963e-05	1	1	1	1	A0A571BF58	A0A571BF58 [2621-2639]; [2864-2882]; [3350-3368]	A0A571BF58 1xCarbamidomethyl [C2628]; 1xCarbamidomethyl [C2871]; 1xCarbamidomethyl [C3357]	Nebulin OS=Mus musculus OX=10090 GN=Neb PE=1 SV=1	0	2684.33	7.182	0.671	0.937	0.519	0.504	1.708	0.00106744	0.554255	0.799663	0.359917	0.373351	0.295504	0.0598177	0.999952	0.999996	0.968507	0.990086	0.994122	1540.2	143.8	200.9	111.3	108	214.4	366.4	70.46	6.18	7.83	2.64	4.94		26.72	876.7	541.6	122.1
High	[K].HPLHEWTCLPDQNDVIHAR.[Q]	1xCarbamidomethyl [C8]; 1xTMTpro [N-Term]	0.0290448	0.00206579	1	1	1	1	A0A571BF58	A0A571BF58 [3107-3125]	A0A571BF58 1xCarbamidomethyl [C3114]	Nebulin OS=Mus musculus OX=10090 GN=Neb PE=1 SV=1	0	2642.32	8.93	1.41	1.226	1.039	1.205	1.973	3.69653e-05	0.548097	0.483363	0.64014	0.502635	0.0923517	0.00511169	0.999952	0.999091	1	0.99991	0.844143	392.2	61.9	53.9	45.6	52.9	43.9	86.6	63.99	6.95	17.8	27.79	6.1		0.31	210.4	146.3	52.3
High	[K].KCQTLVSDVDYR.[N]	1xCarbamidomethyl [C2]; 1xTMTpro [K1]; 1xTMTpro [N-Term]	0.00913429	0.000605469	1	1	1	1	A0A571BF58	A0A571BF58 [3338-3349]; [4067-4078]	A0A571BF58 1xCarbamidomethyl [C3339]; 1xCarbamidomethyl [C4068]	Nebulin OS=Mus musculus OX=10090 GN=Neb PE=1 SV=1	1	2092.14	7.901	0.479	0.44	0.442	0.54	1.712	0.0266986	0.474884	0.509843	0.26406	0.564748	0.159384	0.421268	0.999596	0.999526	0.911337	0.99991	0.934552	3946	239.4	219.9	220.5	269.9	499.4	855.1	55.82	2.29	3.16	9.81	14.6		15.97	1973.1	1579.6	215.8
High	[K].HPLHEWTCLPDQNDVIQAR.[K]	1xCarbamidomethyl [C8]; 1xTMTpro [N-Term]	0.0163912	0.00109426	1	1	1	2	A0A571BF58	A0A571BF58 [3593-3611]; [3836-3854]	A0A571BF58 1xCarbamidomethyl [C3600]; 1xCarbamidomethyl [C3843]	Nebulin OS=Mus musculus OX=10090 GN=Neb PE=1 SV=1	0	2633.32	2.857	1.346	1.18	2.052	0.939	1.404	0.0402642	0.475344	0.45496	0.159617	0.828507	0.324734	0.519549	0.999596	0.999091	0.783444	0.99991	0.994122	1054.6	496.7	435.5	757.3	346.5	369.1	518.3	60.46	6.11	13.46	0.58	2.86		10.11	548.6	405.8	422
High	[K].GHYIGCPSAK.[E]	1xCarbamidomethyl [C6]; 1xTMTpro [K10]; 1xTMTpro [N-Term]	0.0247222	0.00172427	1	1	1	1	A0A571BF58	A0A571BF58 [4499-4508]	A0A571BF58 1xCarbamidomethyl [C4504]	Nebulin OS=Mus musculus OX=10090 GN=Neb PE=1 SV=1	0	1697.93	5.334	0.714	0.602	0.663	0.63	1.499	0.00184937	0.668306	0.677728	0.54802	0.637643	0.312381	0.0844002	0.999952	0.999996	1	0.99991	0.994122	1684.7	225.5	190.3	209.4	198.9	315.9	473.5	47.5	1.83	11.33	9.19	10.43		1.96	787.1	721.8	197.5
High	[R].QYLHQWSCFPDQNDVIQAR.[K]	1xCarbamidomethyl [C8]; 1xTMTpro [N-Term]	0.00127597	5.93436e-05	1	1	1	1	A0A571BF58	A0A571BF58 [4565-4583]	A0A571BF58 1xCarbamidomethyl [C4572]	Nebulin OS=Mus musculus OX=10090 GN=Neb PE=1 SV=1	0	2709.32	1.827	0.984	1.22	1.112	0.598	1.606	0.148892	0.789972	0.369086	0.668673	0.59034	0.238791	0.86038	0.999952	0.989389	1	0.99991	0.98645	621	334.7	414.9	378	203.2	340	546	27.93	0.56	2.38	16.81	7.71		7.02	249.9	308.9	295.7
High	[K].NAQEILCDSVYR.[T]	1xCarbamidomethyl [C7]; 1xTMTpro [N-Term]	9.65104e-05	2.82963e-05	1	1	1	1	A0A571BF58	A0A571BF58 [4619-4630]	A0A571BF58 1xCarbamidomethyl [C4625]	Nebulin OS=Mus musculus OX=10090 GN=Neb PE=1 SV=1	0	1771.9	6.545	0.834	0.784	0.62	0.569	1.479	0.0014362	0.842934	0.909464	0.560723	0.42369	0.3326	0.0728526	0.999952	0.999996	1	0.99991	0.994122	1321.6	168.5	158.3	125.1	114.8	201.9	298.7	63.09	3.31	15.87	0.19	6.86		10.17	703.4	497	146
High	[R].QYLHQWTCHPDQNDVIQAK.[I]	1xCarbamidomethyl [C8]; 1xTMTpro [K19]; 1xTMTpro [N-Term]	0.0107965	0.000684031	1	1	1	1	A0A571BF58	A0A571BF58 [5049-5067]	A0A571BF58 1xCarbamidomethyl [C5056]	Nebulin OS=Mus musculus OX=10090 GN=Neb PE=1 SV=1	0	2989.52	3.029	0.93	1.217	0.68	0.965	2.647	0.0169923	0.955551	0.472813	0.674596	0.851673	0.0861097	0.326277	0.999952	0.999091	1	0.99991	0.826959	588	180.6	236.3	131.9	187.3	194.2	514	19.1	3.15	10.5	2.4	0.12		17.97	221.9	311.9	163.8
High	[K].EISEFPGVVHCLDFQQMR.[S]	1xCarbamidomethyl [C11]; 1xTMTpro [N-Term]	1.32074e-06	2.82963e-05	1	1	1	1	A0A571BF58	A0A571BF58 [5235-5252]	A0A571BF58 1xCarbamidomethyl [C5245]	Nebulin OS=Mus musculus OX=10090 GN=Neb PE=1 SV=1	0	2496.23	7.798	0.518	0.475	0.413	0.602	1.471	0.00154856	0.358946	0.304125	0.134162	0.4694	0.383647	0.0758275	0.995541	0.9755	0.730776	0.99991	0.994122	1645.2	109.2	100.2	87	127	211	310.4	50.71	23	12.45	2.7	3.57		9.13	788.7	686.9	82.2
High	[R].CQYILSDLEYR.[H]	1xCarbamidomethyl [C1]; 1xTMTpro [N-Term]	0.00020614	2.82963e-05	1	1	1	3	A0A571BF58	A0A571BF58 [5283-5293]	A0A571BF58 1xCarbamidomethyl [C5283]	Nebulin OS=Mus musculus OX=10090 GN=Neb PE=1 SV=1	0	1763.9	8.976	0.448	0.698	0.48	0.904	1.476	0.0275326	0.425892	0.939376	0.423277	0.88311	0.335479	0.42888	0.999596	0.999996	0.991409	0.999916	0.994122	4228.9	211.3	328.7	226.1	425.9	471.1	695.2	68.58	2.07	9.91	16.73	7.59		7	2365.3	1513.4	184.7
High	[K].GIGCYVWDTPEILHAK.[H]	1xCarbamidomethyl [C4]; 1xTMTpro [K16]; 1xTMTpro [N-Term]	0.000609076	2.82963e-05	1	1	1	1	A0A571BF58	A0A571BF58 [5577-5592]	A0A571BF58 1xCarbamidomethyl [C5580]	Nebulin OS=Mus musculus OX=10090 GN=Neb PE=1 SV=1	0	2467.33	2.648	0.852	0.833	0.68	0.961	3.204	0.233453	0.989724	0.934804	0.597351	0.954654	0.284078	0.945895	0.999952	0.999996	1	0.99999	0.994122	2942.4	947.1	925.6	755.3	1067.4	1111.1	3560	22.7	4.6	8.05	7.27	6.17		6.59	1139.6	1520.7	813.2
High	[K].GLGCFLYDTPDMVR.[S]	1xCarbamidomethyl [C4]; 1xTMTpro [N-Term]	0.000177119	2.82963e-05	1	1	1	1	A0A571BF58	A0A571BF58 [5824-5837]	A0A571BF58 1xCarbamidomethyl [C5827]	Nebulin OS=Mus musculus OX=10090 GN=Neb PE=1 SV=1	0	1947.96	5.332	0.517	0.554	0.36	0.525	1.423	0.0333972	0.521646	0.699696	0.203761	0.500387	0.337543	0.472162	0.999952	0.999996	0.846139	0.99991	0.994122	2725	264.2	283.3	184.1	268.1	511.1	727.2	29.21	0.15	10.69	12	14.34		7.39	1106.9	1342.8	234.6
High	[K].TLCMESEHILPDGSR.[V]	1xCarbamidomethyl [C3]; 1xTMTpro [N-Term]	2.6541e-05	2.82963e-05	1	1	1	1	A0A571BF69	A0A571BF69 [1435-1449]; [2330-2344]	A0A571BF69 1xCarbamidomethyl [C1437]; 1xCarbamidomethyl [C2332]	Maltase-glucoamylase OS=Mus musculus OX=10090 GN=Mgam PE=1 SV=1	0	2049.01	0.223	0.258	0.548	3.158	0.5	0.297	0.0982218	0.113271	0.695009	0.070828	0.54644	0.365264	0.760501	0.867784	0.999996	0.552829	0.99991	0.994122	129.9	150.6	319.8	1843.4	291.8	583.6	173.2	15.55	4.14	10.7	18.05	2.87		8.92	47.8	70.7	129.7
High	[K].DLTTNNILCK.[F]	1xCarbamidomethyl [C9]; 1xTMTpro [K10]; 1xTMTpro [N-Term]	0.00337742	0.000263321	1	1	1	2	A0A571BF69	A0A571BF69 [2628-2637]	A0A571BF69 1xCarbamidomethyl [C2636]	Maltase-glucoamylase OS=Mus musculus OX=10090 GN=Mgam PE=1 SV=1	0	1800.02	0.312	0.249	0.358	2.393	0.442	0.459	0.177478	0.12245	0.181888	0.428411	0.174426	0.582603	0.893772	0.881593	0.896816	0.991746	0.884407	0.995093	598.6	477.9	685.8	4586.3	847.4	1916.7	879.7	13.76	7.82	8.44	20.87	3.17		7.19	217.4	329.9	401.1
High	[K].TLCMDAVQHWGK.[Q]	1xCarbamidomethyl [C3]; 1xTMTpro [K12]; 1xTMTpro [N-Term]	0.00322992	0.000207355	1	1	1	1	A0A571BF69	A0A571BF69 [541-552]	A0A571BF69 1xCarbamidomethyl [C543]	Maltase-glucoamylase OS=Mus musculus OX=10090 GN=Mgam PE=1 SV=1	0	2054.08	0.788	0.268	0.522	1.73	0.742	3.792	0.959078	0.157903	0.636608	0.435816	0.7571	0.14889	0.999984	0.915786	0.999526	0.993215	0.99991	0.921916	696.9	236.8	461.5	1530.3	656.6	884.6	3354.2	7.1	2.11	15.18	6.99	8.07		0.01	241.4	402.7	213.2
High	[R].CFQQAHYEIR.[R]	1xCarbamidomethyl [C1]; 1xTMTpro [N-Term]	0.0119481	0.000763256	1	1	1	1	A0A5F8MPI9	A0A5F8MPI9 [1034-1043]	A0A5F8MPI9 1xCarbamidomethyl [C1034]	Rap guanine nucleotide exchange factor (GEF) 1 OS=Mus musculus OX=10090 GN=Rapgef1 PE=1 SV=1	0	1655.83	0.763	1.923	0.628	0.767	0.741	0.564	0.929841	0.217086	0.689044	0.768614	0.887165	0.858495	0.999984	0.953189	0.999996	1	0.999916	0.998045	264.4	666.8	217.7	265.8	256.7	346.7	195.5	10.43	5.08	6.27	3.19	2.48		10.61	80.9	173	570.6
High	[R].SAVSQTTDSSGCR.[V]	1xCarbamidomethyl [C12]; 1xTMTpro [N-Term]	9.51867e-06	2.82963e-05	1	1	1	1	A0A5F8MPI9	A0A5F8MPI9 [474-486]	A0A5F8MPI9 1xCarbamidomethyl [C485]	Rap guanine nucleotide exchange factor (GEF) 1 OS=Mus musculus OX=10090 GN=Rapgef1 PE=1 SV=1	0	1659.79	0.281	3.509	1.153	0.186	0.585	0.358	0.0511717	0.0672739	0.528443	0.00497187	0.50107	0.376021	0.57308	0.797485	0.999526	0.105597	0.99991	0.994122	25.7	321.2	105.6	17.1	53.5	91.5	32.7	25.85	7.74	6.78	8.3	5.15		30.81	10.2	13	269.7
High	[R].CAHSDQPLAAR.[G]	1xCarbamidomethyl [C1]; 1xTMTpro [N-Term]	0.00128561	5.93436e-05	1	1	1	1	A0A5F8MPI9	A0A5F8MPI9 [827-837]	A0A5F8MPI9 1xCarbamidomethyl [C827]	Rap guanine nucleotide exchange factor (GEF) 1 OS=Mus musculus OX=10090 GN=Rapgef1 PE=1 SV=1	0	1529.78	1.087	1.671	1.01	0.786	0.789	2.257	0.563293	0.23988	0.727621	0.72829	0.865023	0.126451	0.996109	0.964746	0.999996	1	0.999916	0.899706	250.3	384.9	232.6	180.9	181.8	230.3	519.9	2.27	8.17	0.87	31.27	6.01		3.51	83.8	149.7	322.2
High	[R].QTSEGLAEYCTLIDSSSSFR.[A]	1xCarbamidomethyl [C10]; 1xTMTpro [N-Term]	2.3326e-05	2.82963e-05	1	1	1	1	A0A5F8MPI9	A0A5F8MPI9 [959-978]	A0A5F8MPI9 1xCarbamidomethyl [C968]	Rap guanine nucleotide exchange factor (GEF) 1 OS=Mus musculus OX=10090 GN=Rapgef1 PE=1 SV=1	0	2555.23	1.248	1.541	1.093	0.977	1.125	1.526	0.3862	0.431674	0.631436	0.867177	0.675526	0.269343	0.996089	0.999596	0.999526	1	0.99991	0.994122	178.4	220.4	156.2	139.7	160.9	143	218.2	18	2.39	0.86	14.44	16.9		0.17	66.8	95.4	192.2
High	[R].SVAVLTECMR.[N]	1xCarbamidomethyl [C8]; 1xTMTpro [N-Term]	0.0022405	0.000117823	1	1	1	1	A0A5F8MPP0	A0A5F8MPP0 [285-294]	A0A5F8MPP0 1xCarbamidomethyl [C292]	Pleckstrin homology domain containing, family G (with RhoGef domain) member 1 OS=Mus musculus OX=10090 GN=Plekhg1 PE=1 SV=1	0	1469.78	1.412	1.674	1.139	0.953	1.169	1.856	0.299575	0.331712	0.489631	0.91115	0.553289	0.195777	0.975081	0.990263	0.999091	1	0.99991	0.960427	556.6	659.9	449	375.5	460.8	394.2	731.6	4.13	1.1	6.41	1.02	1.05		0.27	188.8	328.5	590
High	[R].SVGTSGCDAR.[E]	1xCarbamidomethyl [C7]; 1xTMTpro [N-Term]	0.0011483	5.93436e-05	1	1	1	1	A0A7N9VSG0	A0A7N9VSG0 [569-578]	A0A7N9VSG0 1xCarbamidomethyl [C575]	ATPase family gene 2 protein homolog B OS=Mus musculus OX=10090 GN=Afg2b PE=2 SV=1	0	1313.64	2.47	0.387	0.942	1.17	0.882	0.909	0.070913	0.133695	0.738936	0.611307	0.891634	0.688394	0.668075	0.891901	0.999996	1	0.999916	0.995093	837.5	131.2	319.6	396.9	299.2	339.1	308.4	19.87	7.74	6.07	8.22	5.02		3.76	317.8	441.8	110.2
High	[K].ASQQECQEILSR.[S]	1xCarbamidomethyl [C6]; 1xTMTpro [N-Term]	3.59631e-05	2.82963e-05	1	1	1	1	A0A7N9VSG0	A0A7N9VSG0 [604-615]	A0A7N9VSG0 1xCarbamidomethyl [C609]	ATPase family gene 2 protein homolog B OS=Mus musculus OX=10090 GN=Afg2b PE=2 SV=1	0	1752.89	0.827	0.448	0.68	2.103	1.941	0.553	0.882748	0.308477	0.71859	0.185653	0.21262	0.802621	0.999984	0.989613	0.999996	0.820376	0.924155	0.997925	238.9	129.5	196.4	607.2	560.7	288.8	159.8	15.89	12.16	8.95	2	0.52		30.7	70.3	162.5	105.4
High	[R].RFAAFCSPNLPPLATVGADVTINR.[E]	1xCarbamidomethyl [C6]; 1xTMTpro [N-Term]	1.78348e-11	2.82963e-05	1	1	1	1	A0JNU3	A0JNU3 [193-216]	A0JNU3 1xCarbamidomethyl [C198]	60 kDa lysophospholipase OS=Mus musculus OX=10090 GN=Aspg PE=1 SV=1	1	2891.55	1.159	0.596	0.759	0.683	1.645	0.923	0.666435	0.72789	0.97542	0.561881	0.463723	0.766802	0.996109	0.999952	0.999996	1	0.99991	0.996886	1016.3	522.7	665.7	598.4	1442.6	876.7	808.9	5.77	1.33	7.5	2.48	11.18		1.61	321.4	643.3	459.3
High	[R].GEMTLPATDVLLQDGMLGCR.[V]	1xCarbamidomethyl [C19]; 1xTMTpro [N-Term]	1.02263e-09	2.82963e-05	1	1	1	1	A0JNU3	A0JNU3 [358-377]	A0JNU3 1xCarbamidomethyl [C376]	60 kDa lysophospholipase OS=Mus musculus OX=10090 GN=Aspg PE=1 SV=1	0	2481.25	1.325	0.934	0.954	0.806	2.653	1.215	0.343564	0.965042	0.847347	0.734675	0.0689005	0.500519	0.989988	0.999952	0.999996	1	0.641055	0.994122	221	155.8	159.1	134.4	442.6	166.8	202.6	8.66	5.76	6.87	6.38	7.79		3.53	77.4	126.3	132.7
High	[R].LSPQELEDVGTELCR.[L]	1xCarbamidomethyl [C14]; 1xTMTpro [N-Term]	3.36766e-08	2.82963e-05	1	1	1	2	A0JNU3	A0JNU3 [490-504]	A0JNU3 1xCarbamidomethyl [C503]	60 kDa lysophospholipase OS=Mus musculus OX=10090 GN=Aspg PE=1 SV=1	0	2050.04	1.606	0.558	1.072	0.789	1.845	1.212	0.501485	0.646731	0.663766	0.608117	0.584488	0.600954	0.996109	0.999952	0.999996	1	0.99991	0.995093	1865.6	648.3	1245.4	916	2142.3	1161.3	1407.7	15.15	5.25	1.99	8.72	1.29		12.81	551.9	1262.3	596.8
High	[R].SLDIPGGPAEQYCSLAR.[D]	1xCarbamidomethyl [C13]; 1xTMTpro [N-Term]	2.15119e-08	2.82963e-05	1	1	1	1	A1IGU4	A1IGU4 [309-325]	A1IGU4 1xCarbamidomethyl [C321]	Rho guanine nucleotide exchange factor 37 OS=Mus musculus OX=10090 GN=Arhgef37 PE=2 SV=1	0	2138.09	0.951	0.584	1.021	1.038	2.071	1.558	0.713789	0.375453	0.712203	0.762178	0.132489	0.370156	0.999058	0.996752	0.999996	1	0.806597	0.994122	210.7	129.4	226.1	229.9	458.7	221.5	345	26.66	16.1	12.38	15.98	3.2		16.32	84	105.8	102.4
High	[R].QICEDHIK.[A]	1xCarbamidomethyl [C3]; 1xTMTpro [K8]; 1xTMTpro [N-Term]	5.17812e-05	2.82963e-05	1	1	1	2	A2A432	A2A432 [319-326]	A2A432 1xCarbamidomethyl [C321]	Cullin-4B OS=Mus musculus OX=10090 GN=Cul4b PE=1 SV=1	0	1650.91	0.652	1.207	0.351	1.141	1.268	0.462	0.703564	0.964334	0.264928	0.965239	0.95766	0.514644	0.999058	0.999952	0.956346	1	0.99999	0.994122	1113.1	2061.8	599.1	1948.3	2166.4	1707.9	788.5	7.99	0.37	6.3	15.41	5.91		16.72	388	639.2	1833.8
High	[K].LLDCLQESHSFSK.[A]	1xCarbamidomethyl [C4]; 1xTMTpro [K13]; 1xTMTpro [N-Term]	6.28887e-10	2.82963e-05	1	1	1	1	A2A5R2	A2A5R2 [1621-1633]	A2A5R2 1xCarbamidomethyl [C1624]	Brefeldin A-inhibited guanine nucleotide-exchange protein 2 OS=Mus musculus OX=10090 GN=Arfgef2 PE=1 SV=1	0	2172.16	0.936	1.045	0.571	1.573	1.108	1.473	0.79106	0.757637	0.802014	0.43519	0.791968	0.267425	0.999984	0.999952	0.999996	0.992976	0.99991	0.994122	667.9	746.4	408	1123	791.1	714	1051.7	5.85	7.67	3.98	18.19	10.77		2.93	211.1	423	627.1
High	[R].TCYNIYLASK.[N]	1xCarbamidomethyl [C2]; 1xTMTpro [K10]; 1xTMTpro [N-Term]	1.44679e-06	2.82963e-05	2	2	1	1	A2A5R2; G3X9K3	A2A5R2 [165-174]; G3X9K3 [177-186]	A2A5R2 1xCarbamidomethyl [C166]; G3X9K3 1xCarbamidomethyl [C178]	Brefeldin A-inhibited guanine nucleotide-exchange protein 2 OS=Mus musculus OX=10090 GN=Arfgef2 PE=1 SV=1 Brefeldin A-inhibited guanine nucleotide-exchange protein 1 OS=Mus musculus OX=10090 GN=Arfgef1 PE=1 SV=1	0	1841.01	0.902	0.647	0.435	1.326	0.889	0.756	0.955503	0.700055	0.395075	0.777511	0.755859	0.967239	0.999984	0.999952	0.994179	1	0.99991	0.999948	1285.3	922	619.8	1889	1265.9	1424.5	1077.6	5.75	7.19	5.39	12.69	0.55		9.62	406.5	813.4	777.3
High	[R].ACQVALDEIK.[A]	1xCarbamidomethyl [C2]; 1xTMTpro [K10]; 1xTMTpro [N-Term]	3.67919e-05	2.82963e-05	1	1	1	1	A2A5R2	A2A5R2 [35-44]	A2A5R2 1xCarbamidomethyl [C36]	Brefeldin A-inhibited guanine nucleotide-exchange protein 2 OS=Mus musculus OX=10090 GN=Arfgef2 PE=1 SV=1	0	1755	0.803	0.838	0.727	1.319	1.177	0.771	0.8643	0.872423	0.889805	0.49414	0.624393	0.99955	0.999984	0.999952	0.999996	1	0.99991	0.999948	187	195.1	169.3	307.2	274.1	232.8	179.4	11.25	3.43	7.94	7.14	33.5		10.27	66.7	104.9	168.9
High	[R].RACQVALDEIKAELEK.[Q]	1xCarbamidomethyl [C3]; 2xTMTpro [K11; K16]; 1xTMTpro [N-Term]	3.63047e-07	2.82963e-05	1	1	1	1	A2A5R2	A2A5R2 [34-49]	A2A5R2 1xCarbamidomethyl [C36]	Brefeldin A-inhibited guanine nucleotide-exchange protein 2 OS=Mus musculus OX=10090 GN=Arfgef2 PE=1 SV=1	2	2785.61	0.354	0.598	0.234	0.605	0.669	0.154	0.254043	0.664736	0.0599764	0.370191	0.545415	0.0324534	0.960039	0.999952	0.669359	0.971931	0.99991	0.607008	428.7	725.7	284.2	733.7	810.9	1212.6	186.9	1.94	18.24	7.89	12.87	9.86		19.96	139.3	264.1	732.9
High	[R].RCSVTSVESTVSSGTQTAIQDDPEQFEVIK.[Q]	1xCarbamidomethyl [C2]; 1xTMTpro [K30]; 1xTMTpro [N-Term]	6.38514e-10	2.82963e-05	1	1	1	1	A2A5R2	A2A5R2 [619-648]	A2A5R2 1xCarbamidomethyl [C620]	Brefeldin A-inhibited guanine nucleotide-exchange protein 2 OS=Mus musculus OX=10090 GN=Arfgef2 PE=1 SV=1	1	3906.99	1.045	1.37	1.015	1.268	1.043	2.228	0.523962	0.570879	0.702162	0.506275	0.727857	0.131395	0.996109	0.999952	0.999996	1	0.99991	0.906735	123.6	162	120.1	149.9	123.4	118.3	263.5	39.17	17.25	7.57	8.16	14.38		14.05	54.1	56.5	127.1
High	[K].QETSSLACCLR.[I]	2xCarbamidomethyl [C8; C9]; 1xTMTpro [N-Term]	1.72143e-05	2.82963e-05	1	1	1	1	A2A5R2	A2A5R2 [1661-1671]	A2A5R2 2xCarbamidomethyl [C1668; C1669]	Brefeldin A-inhibited guanine nucleotide-exchange protein 2 OS=Mus musculus OX=10090 GN=Arfgef2 PE=1 SV=1	0	1628.81	1.357	1.436	0.667	1.557	0.599	0.459	0.30792	0.530562	0.692234	0.27896	0.541112	0.699659	0.977984	0.999952	0.999996	0.922617	0.99991	0.995093	232.1	245.5	114.1	266.2	102.5	171	78.6	10.74	2.7	11.21	2.47	1.14		12.72	82.5	130.7	213.7
High	[R].IGTGGQVVDCSR.[L]	1xCarbamidomethyl [C10]; 1xTMTpro [N-Term]	4.2226e-06	2.82963e-05	1	1	1	1	A2A5Z6	A2A5Z6 [142-153]	A2A5Z6 1xCarbamidomethyl [C151]	E3 ubiquitin-protein ligase SMURF2 OS=Mus musculus OX=10090 GN=Smurf2 PE=1 SV=1	0	1552.81	0.909	1.518	0.779	1.141	1.273	1.096	0.815698	0.474521	0.882468	0.652421	0.494736	0.634535	0.999984	0.999596	0.999996	1	0.99991	0.995093	184.8	308.6	158.3	231.9	258.8	203.2	222.8	14.78	2.36	11.17	7.79	1.83		19.64	67.6	101.1	269.2
High	[R].QELSQQQPQAGHCR.[I]	1xCarbamidomethyl [C13]; 1xTMTpro [N-Term]	1.27361e-08	2.82963e-05	1	1	1	1	A2A5Z6	A2A5Z6 [381-394]	A2A5Z6 1xCarbamidomethyl [C393]	E3 ubiquitin-protein ligase SMURF2 OS=Mus musculus OX=10090 GN=Smurf2 PE=1 SV=1	0	1970.98	0.717	0.831	0.75	1.416	1.514	0.605	0.945491	0.75211	0.840739	0.365776	0.305396	0.949378	0.999984	0.999952	0.999996	0.969438	0.980456	0.999948	69.1	80	72.2	136.3	145.8	96.3	58.2	8.17	2.38	5.6	6.86	2.45		2.91	24.1	39.6	69.8
High	[R].SQSASYYPVCHSK.[L]	1xCarbamidomethyl [C10]; 1xTMTpro [K13]; 1xTMTpro [N-Term]	7.71423e-09	2.82963e-05	1	1	1	1	A2A690	A2A690 [1724-1736]	A2A690 1xCarbamidomethyl [C1733]	Protein TANC2 OS=Mus musculus OX=10090 GN=Tanc2 PE=1 SV=1	0	2122.09	0.194	2.626	0.34	0.995	0.296	0.482	0.0147861	0.187324	0.141506	0.915039	0.0953284	0.709832	0.302508	0.937973	0.849193	1	0.72521	0.995093	79.2	1073	139.1	406.6	121	408.6	196.9	16.82	7.27	2.06	15.27	1.84		20.16	29.4	42.7	1002.1
High	[K].SSMDSCLYR.[V]	1xCarbamidomethyl [C6]; 1xTMTpro [N-Term]	0.0744461	0.00498168	1	1	1	1	A2A690	A2A690 [219-227]	A2A690 1xCarbamidomethyl [C224]	Protein TANC2 OS=Mus musculus OX=10090 GN=Tanc2 PE=1 SV=1	0	1422.67	0.805	2.144	0.847	0.728	0.814	1.048	0.979765	0.198886	0.903645	0.775391	0.915263	0.624967	0.999984	0.946651	0.999996	1	0.999916	0.995093	174.4	464.4	183.5	157.6	176.3	216.6	227	16.29	6.88	11.22	4.61	3.15		19.56	64.5	94.4	392.4
High	[R].LVALSCHGTR.[M]	1xCarbamidomethyl [C6]; 1xTMTpro [N-Term]	4.38141e-05	2.82963e-05	1	1	1	1	A2A690	A2A690 [383-392]	A2A690 1xCarbamidomethyl [C388]	Protein TANC2 OS=Mus musculus OX=10090 GN=Tanc2 PE=1 SV=1	0	1417.79	0.461	5.008	0.579	1.546	0.7	0.34	0.302384	0.0122913	0.368067	0.259626	0.717001	0.329155	0.97556	0.547751	0.989389	0.907073	0.99991	0.994122	42.9	466.8	53.9	144.1	65.2	93.2	31.7	5.46	8.38	9.62	4.14	6.39		12.86	14.7	25.1	390.2
High	[R].ELPLTQAPSAHSSITSGSCPGTPEMR.[R]	1xCarbamidomethyl [C19]; 1xTMTpro [N-Term]	3.27493e-11	2.82963e-05	1	1	1	1	A2A690	A2A690 [413-438]	A2A690 1xCarbamidomethyl [C431]	Protein TANC2 OS=Mus musculus OX=10090 GN=Tanc2 PE=1 SV=1	0	3015.48	0.64	4.385	1.095	1.456	0.483	1.438	0.730901	0.0122687	0.614905	0.302561	0.364634	0.314974	0.999984	0.547751	0.999526	0.938858	0.989932	0.994122	45.6	312.9	78.1	103.9	34.5	71.4	102.6	4.31	16.38	13.79	1.4	1.15		4.23	15.5	26.9	247.1
High	[R].SCVQDPMASFR.[R]	1xCarbamidomethyl [C2]; 1xTMTpro [N-Term]	8.42933e-06	2.82963e-05	1	1	1	1	A2A690	A2A690 [506-516]	A2A690 1xCarbamidomethyl [C507]	Protein TANC2 OS=Mus musculus OX=10090 GN=Tanc2 PE=1 SV=1	0	1601.77	0.394	3.14	0.445	0.953	0.377	1.055	0.282633	0.117576	0.408149	0.857385	0.221638	0.49783	0.968857	0.872878	0.99714	1	0.931483	0.994122	169.3	1350.3	191.2	409.9	162.2	430.1	453.5	10.98	10.67	11.88	1.61	4.82		12.94	60.3	95.2	1110.6
High	[R].GGDTGSGCGPGRPEGDSAPAATTR.[A]	1xCarbamidomethyl [C8]; 1xTMTpro [N-Term]	0.00162307	9.06176e-05	1	1	1	1	A2A6P4	A2A6P4 [5-28]	A2A6P4 1xCarbamidomethyl [C12]	Family with sequence similarity 104, member A OS=Mus musculus OX=10090 GN=Fam104a PE=1 SV=1	0	2535.18	5.44	1.043	0.479	0.276	1.061	0.01	0.000708455	0.910468	0.341383	0.0552196	0.652607	1e-17	0.0446701	0.999952	0.98435	0.486512	0.99991	1.39481e-15	397.3	76.2	35	20.2	77.5	73	0	48.84	12.79	9.65	9.13	2.51			91.3	346.1	61.7
High	[R].TGCFIVIDAMLER.[MI]	1xCarbamidomethyl [C3]; 1xTMTpro [N-Term]	2.16759e-08	2.82963e-05	3	3	1	2	A2A8L5; B0V2N1; Q64487	A2A8L5 [1546-1558]; B0V2N1 [1555-1567]; Q64487 [1560-1572]	A2A8L5 1xCarbamidomethyl [C1548]; B0V2N1 1xCarbamidomethyl [C1557]; Q64487 1xCarbamidomethyl [C1562]	Receptor-type tyrosine-protein phosphatase F OS=Mus musculus OX=10090 GN=Ptprf PE=1 SV=1 Receptor-type tyrosine-protein phosphatase S OS=Mus musculus OX=10090 GN=Ptprs PE=1 SV=1 Receptor-type tyrosine-protein phosphatase delta OS=Mus musculus OX=10090 GN=Ptprd PE=1 SV=3	0	1828.96	0.294	2.26	0.22	1.114	0.642	0.255	0.150974	0.445072	0.0463019	0.868891	0.504215	0.295888	0.86197	0.999596	0.613677	1	0.99991	0.994122	362.1	2779.5	270.3	1369.7	789.2	1230.1	314.2	2.15	4.24	5.78	9.87	9.6		11.97	121.1	216.7	2540.6
High	[K].TVDIYGHVTCMR.[S]	1xCarbamidomethyl [C10]; 1xTMTpro [N-Term]	1.09229e-06	2.82963e-05	1	1	1	1	A2A8L5	A2A8L5 [1564-1575]	A2A8L5 1xCarbamidomethyl [C1573]	Receptor-type tyrosine-protein phosphatase F OS=Mus musculus OX=10090 GN=Ptprf PE=1 SV=1	0	1755.88	0.299	1.631	0.564	2.849	0.806	0.325	0.135386	0.425234	0.515632	0.0479838	0.888718	0.406386	0.83662	0.999596	0.999526	0.452157	0.999916	0.994122	57.6	313.9	108.6	548.3	155.2	192.5	62.6	10.34	4.43	14.39	2.49	6.48		13.12	20.4	32.5	269.9
High	[R].VCLQPIR.[G]	1xCarbamidomethyl [C2]; 1xTMTpro [N-Term]	0.00542671	0.000371496	3	3	1	1	A2A8L5; B0V2N1; Q64487	A2A8L5 [1672-1678]; B0V2N1 [1681-1687]; Q64487 [1686-1692]	A2A8L5 1xCarbamidomethyl [C1673]; B0V2N1 1xCarbamidomethyl [C1682]; Q64487 1xCarbamidomethyl [C1687]	Receptor-type tyrosine-protein phosphatase F OS=Mus musculus OX=10090 GN=Ptprf PE=1 SV=1 Receptor-type tyrosine-protein phosphatase S OS=Mus musculus OX=10090 GN=Ptprs PE=1 SV=1 Receptor-type tyrosine-protein phosphatase delta OS=Mus musculus OX=10090 GN=Ptprd PE=1 SV=3	0	1189.7	0.218	2.749	0.181	1.157	0.574	0.112	0.0372278	0.198132	0.0191606	0.718533	0.603443	0.050907	0.49962	0.94626	0.424978	1	0.99991	0.723522	143.7	1815.3	119.4	763.8	379.2	660.3	73.7	15.14	3.7	11.04	8.21	10.98		14.71	42.5	97.2	1653
High	[R].EKCHQYWPAER.[S]	1xCarbamidomethyl [C3]; 1xTMTpro [K2]; 1xTMTpro [N-Term]	5.13895e-05	2.82963e-05	3	3	1	1	A2A8L5; B0V2N1; Q64487	A2A8L5 [1738-1748]; B0V2N1 [1747-1757]; Q64487 [1752-1762]	A2A8L5 1xCarbamidomethyl [C1740]; B0V2N1 1xCarbamidomethyl [C1749]; Q64487 1xCarbamidomethyl [C1754]	Receptor-type tyrosine-protein phosphatase F OS=Mus musculus OX=10090 GN=Ptprf PE=1 SV=1 Receptor-type tyrosine-protein phosphatase S OS=Mus musculus OX=10090 GN=Ptprs PE=1 SV=1 Receptor-type tyrosine-protein phosphatase delta OS=Mus musculus OX=10090 GN=Ptprd PE=1 SV=3	1	2112.09	0.207	2.452	0.221	0.978	0.476	0.087	0.0368523	0.147532	0.0209397	0.785974	0.362179	0.0156778	0.497228	0.904916	0.442205	1	0.989798	0.431314	71.2	844.9	76.1	337	164	344.6	30.1	20.92	2.32	3.61	6.87	11.23			20.2	50.2	761.9
High	[K].EQFGQDGPITVHCSAGVGR.[T]	1xCarbamidomethyl [C13]; 1xTMTpro [N-Term]	7.8581e-13	2.82963e-05	1	1	1	1	A2A8L5	A2A8L5 [1818-1836]	A2A8L5 1xCarbamidomethyl [C1830]	Receptor-type tyrosine-protein phosphatase F OS=Mus musculus OX=10090 GN=Ptprf PE=1 SV=1	0	2319.15	0.324	1.239	0.632	2.413	0.824	0.627	0.178676	0.560785	0.831296	0.141905	0.963773	0.988177	0.894202	0.999952	0.999996	0.746552	0.99999	0.999948	129.5	494.8	252.6	963.7	329.2	399.4	250.5	20.31	7.92	14.37	2.53	15.26		6.46	49.3	68.1	415
High	[K].TKEQFGQDGPITVHCSAGVGR.[T]	1xCarbamidomethyl [C15]; 1xTMTpro [K2]; 1xTMTpro [N-Term]	5.12686e-11	2.82963e-05	1	1	1	1	A2A8L5	A2A8L5 [1816-1836]	A2A8L5 1xCarbamidomethyl [C1830]	Receptor-type tyrosine-protein phosphatase F OS=Mus musculus OX=10090 GN=Ptprf PE=1 SV=1	1	2852.5	0.142	0.823	0.42	1.965	0.512	0.238	0.021995	0.978538	0.395961	0.291188	0.402961	0.254383	0.378568	0.999952	0.994179	0.931465	0.997746	0.994088	118.6	687.4	350.8	1640.3	427.7	834.8	199	32.07	3.41	32.41	14.13	3.12		6.63	49.2	57.2	624.6
High	[R].TQRPAMVQTEDQYQLCYR.[A]	1xCarbamidomethyl [C16]; 1xTMTpro [N-Term]	1.7433e-11	2.82963e-05	1	1	1	2	A2A8L5	A2A8L5 [1867-1884]	A2A8L5 1xCarbamidomethyl [C1882]	Receptor-type tyrosine-protein phosphatase F OS=Mus musculus OX=10090 GN=Ptprf PE=1 SV=1	1	2591.27	0.191	0.91	0.43	1.873	0.56	0.33	0.0421931	0.907559	0.458136	0.352939	0.43219	0.439948	0.530418	0.999952	0.999091	0.964561	0.99991	0.994122	185	882.5	416.5	1815.2	543.1	969.3	320.2	28.57	1.06	16.29	12.44	15.93		4.77	74.8	91.6	788.7
High	[K].VPEDQTGLSGGVASFVCQATGEPKPR.[I]	1xCarbamidomethyl [C17]; 1xTMTpro [K24]; 1xTMTpro [N-Term]	2.78744e-09	2.82963e-05	1	1	1	1	A2A8L5	A2A8L5 [38-63]	A2A8L5 1xCarbamidomethyl [C54]	Receptor-type tyrosine-protein phosphatase F OS=Mus musculus OX=10090 GN=Ptprf PE=1 SV=1	1	3295.72	0.891	0.887	1.006	1.423	0.621	0.814	0.729857	0.827909	0.552735	0.464794	0.66833	0.743311	0.999984	0.999952	0.999526	1	0.99991	0.995093	438.3	436.2	494.9	700	305.2	491.8	400.2	8.2	9.46	1.2	1.38	6.09		1.24	153	251.3	361.9
High	[R].TAQSTPSAPPQKVTCVSTGSTTVR.[V]	1xCarbamidomethyl [C15]; 1xTMTpro [K12]; 1xTMTpro [N-Term]	1.26397e-08	2.82963e-05	1	1	1	1	A2A8L5	A2A8L5 [601-624]	A2A8L5 1xCarbamidomethyl [C615]	Receptor-type tyrosine-protein phosphatase F OS=Mus musculus OX=10090 GN=Ptprf PE=1 SV=1	1	3069.65	0.147	0.637	0.423	2.402	0.43	0.312	0.00458277	0.511186	0.322441	0.0914639	0.271014	0.463426	0.150517	0.999596	0.982386	0.620052	0.965794	0.994122	21.9	95	63	358	64.1	149	46.6	30.57	13.05	13.02	3.87	7.63		13.04	9	10.7	76.8
High	[K].VTCVSTGSTTVR.[V]	1xCarbamidomethyl [C3]; 1xTMTpro [N-Term]	4.06523e-06	2.82963e-05	1	1	1	1	A2A8L5	A2A8L5 [613-624]	A2A8L5 1xCarbamidomethyl [C615]	Receptor-type tyrosine-protein phosphatase F OS=Mus musculus OX=10090 GN=Ptprf PE=1 SV=1	0	1571.84	0.117	0.783	0.207	3.236	0.87	0.214	0.00708277	0.96428	0.0863746	0.0743279	0.993149	0.20496	0.195729	0.999952	0.742216	0.565222	0.99999	0.96743	85.6	571.2	150.6	2359.4	634.4	729	155.9	3.41	2.8	21.77	11.66	15.6		13.13	28.9	50.8	496.7
High	[K].ACNPLDAGPMVVHCSAGVGR.[T]	2xCarbamidomethyl [C2; C14]; 1xTMTpro [N-Term]	7.73326e-12	2.82963e-05	1	1	1	1	A2A8L5	A2A8L5 [1526-1545]	A2A8L5 2xCarbamidomethyl [C1527; C1539]	Receptor-type tyrosine-protein phosphatase F OS=Mus musculus OX=10090 GN=Ptprf PE=1 SV=1	0	2372.16	0.569	1.103	0.921	2.3	1.112	0.581	0.803592	0.639292	0.71226	0.161153	0.740932	0.94498	0.999984	0.999952	0.999996	0.785649	0.99991	0.999948	358.5	694.7	580.1	1447.9	700	629.6	365.6	21.95	7.15	2.49	8.74	9.45		7.23	138.1	186.3	648.2
High	[K].SNEHVLAGGACFNEK.[A]	1xCarbamidomethyl [C11]; 1xTMTpro [K15]; 1xTMTpro [N-Term]	0.00229136	0.000117823	1	1	1	1	A2A8R0	A2A8R0 [1126-1140]	A2A8R0 1xCarbamidomethyl [C1136]	Zinc finger FYVE domain-containing protein OS=Mus musculus OX=10090 GN=Zfyve9 PE=1 SV=1	0	2241.16	0.822	1.923	2.021	1.168	0.81	0.817	0.94142	0.247204	0.118154	0.655039	0.854758	0.830696	0.999984	0.967205	0.814137	1	0.99991	0.997925	152.6	357	375.3	216.9	150.5	185.7	151.8	42.04	5.38	17.1	2.28	4.66		5.9	37	126	304.9
High	[K].ADSHLVCVQNDDGNYQTQAISIHNQPR.[K]	1xCarbamidomethyl [C7]; 1xTMTpro [N-Term]	3.71721e-08	2.82963e-05	1	1	1	1	A2A8R0	A2A8R0 [1141-1167]	A2A8R0 1xCarbamidomethyl [C1147]	Zinc finger FYVE domain-containing protein OS=Mus musculus OX=10090 GN=Zfyve9 PE=1 SV=1	0	3384.63	0.619	2.1	0.842	1.134	1.015	1.065	0.680988	0.199813	0.988994	0.611956	0.747142	0.511199	0.997872	0.947799	0.999996	1	0.99991	0.994122	53.3	180.7	72.5	97.6	87.3	86	91.6	1.2	6.57	9.42	11.92	4.79		4.42	17.7	32.1	167.9
High	[R].DPAQPQQWVSSQVLLCR.[R]	1xCarbamidomethyl [C16]; 1xTMTpro [N-Term]	1.56484e-09	2.82963e-05	1	1	1	2	A2A8U2	A2A8U2 [106-122]	A2A8U2 1xCarbamidomethyl [C121]	Transmembrane protein 201 OS=Mus musculus OX=10090 GN=Tmem201 PE=1 SV=1	0	2316.21	0.439	1.487	1.957	1.326	0.543	0.489	0.412941	0.533405	0.257553	0.610089	0.546448	0.727165	0.996109	0.999952	0.951538	1	0.99991	0.995093	399.7	1353.9	1781.8	1207.2	494.5	910.5	445.5	9.17	3.13	2.93	1.76	3.46		1.18	123.4	259.2	1174.7
High	[R].DPAQPQQWVSSQVLLCRR.[C]	1xCarbamidomethyl [C16]; 1xTMTpro [N-Term]	2.11525e-06	2.82963e-05	1	1	1	1	A2A8U2	A2A8U2 [106-123]	A2A8U2 1xCarbamidomethyl [C121]	Transmembrane protein 201 OS=Mus musculus OX=10090 GN=Tmem201 PE=1 SV=1	1	2472.31	0.399	1.729	2.244	1.741	0.457	0.399	0.359728	0.663463	0.466321	0.469029	0.303585	0.505006	0.992845	0.999952	0.999091	1	0.980456	0.994122	471.8	2043.8	2653.1	2058.9	539.8	1182.3	471.5	18.25	5.02	1.78	4.84	10.6		16.81	136.5	326.4	1749.7
High	[R].LFHEDGECWVYDEPLLK.[R]	1xCarbamidomethyl [C8]; 1xTMTpro [K17]; 1xTMTpro [N-Term]	2.78287e-07	2.82963e-05	1	1	1	1	A2A8Z1	A2A8Z1 [713-729]	A2A8Z1 1xCarbamidomethyl [C720]	Oxysterol-binding protein-related protein 9 OS=Mus musculus OX=10090 GN=Osbpl9 PE=1 SV=1	0	2758.4	0.601	0.709	0.614	1.757	1.305	1.297	0.703405	0.905225	0.787551	0.336701	0.60517	0.459031	0.999058	0.999952	0.999996	0.953966	0.99991	0.994122	437.5	516.4	446.9	1279	950.2	728.2	944.5	10.27	3.3	6.36	6.66	1.77		0.07	155	247.2	447.5
High	[R].AVACASNSR.[N]	1xCarbamidomethyl [C4]; 1xTMTpro [N-Term]	0.00178944	0.000117823	1	1	1	1	A2A995	A2A995 [673-681]	A2A995 1xCarbamidomethyl [C676]	FYN-binding protein 2 OS=Mus musculus OX=10090 GN=Fyb2 PE=1 SV=1	0	1239.64	0.625	0.986	0.489	0.683	3.246	0.543	0.729381	0.991049	0.247059	0.668253	0.0239714	0.869655	0.999984	0.999952	0.947293	1	0.404799	0.998045	67.7	106.8	52.9	73.9	351.3	108.2	58.7	12.21	3.79	18.9	5.8	13.54		38.98	24.3	37.7	92.2
High	[R].SSISAQPPQWHCYAR.[L]	1xCarbamidomethyl [C12]; 1xTMTpro [N-Term]	1.56098e-06	2.82963e-05	1	1	1	1	A2A9C3	A2A9C3 [1112-1126]	A2A9C3 1xCarbamidomethyl [C1123]	KICSTOR complex protein SZT2 OS=Mus musculus OX=10090 GN=Szt2 PE=1 SV=1	0	2092.04	0.832	1.282	1.071	1.436	1.217	1.098	0.910689	0.582046	0.578761	0.471876	0.559167	0.549458	0.999984	0.999952	0.999526	1	0.99991	0.995093	211	325.3	271.6	364.3	308.7	253.7	278.5	3.71	2.72	10.11	5.92	5.44		8.06	67.7	131.6	283.1
High	[K].EAATHCALLQEHAQR.[C]	1xCarbamidomethyl [C6]; 1xTMTpro [N-Term]	1.43584e-06	2.82963e-05	1	1	1	1	A2A9C3	A2A9C3 [1287-1301]	A2A9C3 1xCarbamidomethyl [C1292]	KICSTOR complex protein SZT2 OS=Mus musculus OX=10090 GN=Szt2 PE=1 SV=1	0	2039.04	1.185	1.414	0.865	1.087	1.052	1.573	0.415126	0.545116	0.948226	0.65238	0.699264	0.244553	0.996109	0.999952	0.999996	1	0.99991	0.989121	105.1	125.3	76.7	96.3	93.3	88.7	139.4	20.67	3.45	2.16	7.12	4.67		5.28	40.1	55.1	108.5
High	[R].AAAHIHSSSGRPTCLR.[Q]	1xCarbamidomethyl [C14]; 1xTMTpro [N-Term]	3.5691e-05	2.82963e-05	1	1	1	1	A2A9C3	A2A9C3 [1722-1737]	A2A9C3 1xCarbamidomethyl [C1735]	KICSTOR complex protein SZT2 OS=Mus musculus OX=10090 GN=Szt2 PE=1 SV=1	1	2025.07	1.03	1.984	0.893	1.315	1.092	0.643	0.594666	0.207385	0.884657	0.441767	0.625928	0.982093	0.996109	0.952656	0.999996	0.996133	0.99991	0.999948	90.5	174.2	78.4	115.5	95.9	87.8	56.5	1.89	0.31	15.88	19.15	0.74		20.96	29.4	55.7	154.2
High	[R].EDGGPGAECR.[H]	1xCarbamidomethyl [C9]; 1xTMTpro [N-Term]	4.09623e-06	2.82963e-05	1	1	1	1	A2A9C3	A2A9C3 [1939-1948]	A2A9C3 1xCarbamidomethyl [C1947]	KICSTOR complex protein SZT2 OS=Mus musculus OX=10090 GN=Szt2 PE=1 SV=1	0	1351.62	0.707	1.447	0.363	1.435	1.069	0.256	0.971917	0.310091	0.0934744	0.421659	0.681665	0.210314	0.999984	0.989613	0.759403	0.991409	0.99991	0.96743	242.3	495.8	124.4	491.6	366.4	342.6	87.7	14.34	2.54	2.88	15.82	0.56		18.96	72.1	163	432
High	[R].RVGEICREVNQR.[L]	1xCarbamidomethyl [C6]; 1xTMTpro [N-Term]	0.109833	0.00664664	1	1	1	1	A2A9C3	A2A9C3 [1957-1968]	A2A9C3 1xCarbamidomethyl [C1962]	KICSTOR complex protein SZT2 OS=Mus musculus OX=10090 GN=Szt2 PE=1 SV=1	2	1819.99	1.547	2.221	1.092	1.81	1.031	0.599	0.195006	0.182254	0.641979	0.144156	0.676059	0.873717	0.912525	0.935482	0.999526	0.749993	0.99991	0.998045	95.2	136.7	67.2	111.5	63.5	61.6	36.9	13.54	6.3	10.32	29.33	15.5		11.56	28.5	63.7	116
High	[R].VFEQHLGSEPDVFSPCSPGQLGPAPR.[P]	1xCarbamidomethyl [C16]; 1xTMTpro [N-Term]	1.34648e-11	2.82963e-05	1	1	1	1	A2A9C3	A2A9C3 [2575-2600]	A2A9C3 1xCarbamidomethyl [C2590]	KICSTOR complex protein SZT2 OS=Mus musculus OX=10090 GN=Szt2 PE=1 SV=1	0	3112.55	1.09	1.515	1.146	1.576	0.97	1.764	0.515388	0.480214	0.623503	0.270114	0.846677	0.237854	0.996109	0.999596	0.999526	0.915407	0.99991	0.98645	193.2	268.6	203.1	279.2	172	177.2	312.7	9.75	5.4	7.49	9.57	10.3		12.75	59.4	125.8	229.3
High	[R].HQDDFDVSLLVCHSAAPFEEQGEAER.[H]	1xCarbamidomethyl [C12]; 1xTMTpro [N-Term]	2.81101e-10	2.82963e-05	1	1	1	1	A2A9C3	A2A9C3 [3158-3183]	A2A9C3 1xCarbamidomethyl [C3169]	KICSTOR complex protein SZT2 OS=Mus musculus OX=10090 GN=Szt2 PE=1 SV=1	0	3290.53	1.427	1.561	1.028	1.188	1.177	1.192	0.254137	0.453041	0.736902	0.603463	0.502083	0.523834	0.960055	0.999596	0.999996	1	0.99991	0.994122	240.1	262.7	172.9	200	198	168.3	200.6	3.4	4.53	2.27	3.04	10.84		6.06	81	142.4	225.7
High	[R].LAGGHCR.[R]	1xCarbamidomethyl [C6]; 1xTMTpro [N-Term]	0.00166005	9.06176e-05	1	1	1	1	A2A9C3	A2A9C3 [3267-3273]	A2A9C3 1xCarbamidomethyl [C3272]	KICSTOR complex protein SZT2 OS=Mus musculus OX=10090 GN=Szt2 PE=1 SV=1	0	1074.58	1.014	1.561	0.736	1.774	1.059	0.226	0.609152	0.439489	0.821432	0.243218	0.72042	0.216348	0.996109	0.999596	0.999996	0.889987	0.99991	0.972712	205.2	315.8	148.9	358.9	214.3	202.4	45.7	24.84	13.11	22.64	22.11	8.44		34.86	56.6	148.9	255.3
High	[R].LGPWERPSELCLETNDER.[S]	1xCarbamidomethyl [C11]; 1xTMTpro [N-Term]	0.0935834	0.00611562	1	1	1	1	A2A9F4	A2A9F4 [16-33]	A2A9F4 1xCarbamidomethyl [C26]	Keratinocyte differentiation factor 1 OS=Mus musculus OX=10090 GN=Kdf1 PE=1 SV=1	0	2505.24	0.967	0.882	1.149	1.761	0.904	0.947	0.66085	0.940715	0.517615	0.233755	0.954597	0.631744	0.996109	0.999952	0.999526	0.881896	0.99999	0.995093	247.4	225.9	294	450.9	231.3	256	242.3	14.96	2.04	8.35	3.15	10.39		15.61	73.3	167.2	197.5
High	[R].IANCNLHNQSVGEGISAAIQDFQVR.[Q]	1xCarbamidomethyl [C4]; 1xTMTpro [N-Term]	1.5687e-12	2.82963e-05	1	1	1	1	A2AAE1	A2AAE1 [1020-1044]	A2AAE1 1xCarbamidomethyl [C1023]	Transmembrane protein KIAA1109 OS=Mus musculus OX=10090 GN=Kiaa1109 PE=1 SV=4	0	3045.55	0.748	1.677	0.899	1.118	0.764	1.124	0.981584	0.340541	0.837918	0.708703	0.871022	0.506505	0.999984	0.991935	0.999996	1	0.999916	0.994122	221	495.7	265.7	330.5	225.8	295.6	332.4	3.07	0.14	3.94	0.57	1		5.2	74.4	131.4	440.1
High	[R].QYIEQLNNCR.[I]	1xCarbamidomethyl [C9]; 1xTMTpro [N-Term]	5.80286e-05	2.82963e-05	1	1	1	1	A2AAE1	A2AAE1 [1045-1054]	A2AAE1 1xCarbamidomethyl [C1053]	Transmembrane protein KIAA1109 OS=Mus musculus OX=10090 GN=Kiaa1109 PE=1 SV=4	0	1641.83	0.447	1.93	0.79	1.436	0.524	0.36	0.407929	0.244837	0.91092	0.437069	0.422634	0.435514	0.996109	0.967205	0.999996	0.993732	0.99991	0.994122	158	681.8	278.9	507.2	185.3	353.2	127.1	6.28	1.89	22.97	2.69	2.16		27.11	49.8	100.4	596.8
High	[R].QASVCSTR.[L]	1xCarbamidomethyl [C5]; 1xTMTpro [N-Term]	0.000310452	2.82963e-05	1	1	1	1	A2AAE1	A2AAE1 [1310-1317]	A2AAE1 1xCarbamidomethyl [C1314]	Transmembrane protein KIAA1109 OS=Mus musculus OX=10090 GN=Kiaa1109 PE=1 SV=4	0	1212.63	0.161	3.915	0.912	0.531	0.228	0.21	0.011733	0.0508788	0.884383	0.337381	0.0263461	0.140525	0.261126	0.755408	0.999996	0.954327	0.424012	0.913583	37.3	905.3	211	122.9	52.6	231.3	48.6	2.36	5.56	27.86	21.24	17.69		13.96	12.5	22.3	835.3
High	[K].SSLHRPLDLDTPTSEESSSSFEQLCVPTFK.[V]	1xCarbamidomethyl [C25]; 1xTMTpro [K30]; 1xTMTpro [N-Term]	2.48316e-07	2.82963e-05	1	1	1	1	A2AAE1	A2AAE1 [1528-1557]	A2AAE1 1xCarbamidomethyl [C1552]	Transmembrane protein KIAA1109 OS=Mus musculus OX=10090 GN=Kiaa1109 PE=1 SV=4	1	4003.03	0.671	1.697	0.91	1.025	0.623	1.272	0.910622	0.374106	0.830562	0.91874	0.503733	0.522884	0.999984	0.996752	0.999996	1	0.99991	0.994122	139.8	353.5	189.7	213.6	129.8	208.4	264.9	10.45	10.39	0.31	13.62	9.15		11.66	49.6	78.9	337.5
High	[K].VNLCLLQASVEESPATVPSR.[S]	1xCarbamidomethyl [C4]; 1xTMTpro [N-Term]	1.18141e-09	2.82963e-05	1	1	1	1	A2AAE1	A2AAE1 [1729-1748]	A2AAE1 1xCarbamidomethyl [C1732]	Transmembrane protein KIAA1109 OS=Mus musculus OX=10090 GN=Kiaa1109 PE=1 SV=4	0	2474.32	1.975	1.443	1.371	1.078	0.728	0.791	0.0905297	0.407004	0.309706	0.74573	0.882252	0.826354	0.732745	0.999596	0.978182	1	0.999916	0.997925	736.1	537.6	511.1	401.6	271.5	372.7	294.8	24.57	0.05	3.86	5.01	0.37		0.31	289	375.3	477.1
High	[R].GLDTTDIGTCAITAIPFEK.[S]	1xCarbamidomethyl [C10]; 1xTMTpro [K19]; 1xTMTpro [N-Term]	8.07398e-09	2.82963e-05	1	1	1	1	A2AAE1	A2AAE1 [1833-1851]	A2AAE1 1xCarbamidomethyl [C1842]	Transmembrane protein KIAA1109 OS=Mus musculus OX=10090 GN=Kiaa1109 PE=1 SV=4	0	2631.42	0.68	2.027	1.064	1.434	0.818	0.757	0.942245	0.224484	0.538837	0.46046	0.983123	0.863111	0.999984	0.957494	0.999526	1	0.99999	0.998045	267.9	798.6	418.9	565	322.3	393.9	298.3	8.93	0.94	13.35	6.61	3.01		5	94	152.8	713.1
High	[R].GEDVDLHLFLPDCHPSK.[Y]	1xCarbamidomethyl [C13]; 1xTMTpro [K17]; 1xTMTpro [N-Term]	3.28633e-06	2.82963e-05	1	1	1	1	A2AAE1	A2AAE1 [585-601]	A2AAE1 1xCarbamidomethyl [C597]	Transmembrane protein KIAA1109 OS=Mus musculus OX=10090 GN=Kiaa1109 PE=1 SV=4	0	2587.35	0.499	1.57	2.107	1.162	0.569	0.852	0.534742	0.312502	0.101968	0.68822	0.592014	0.704189	0.996109	0.989613	0.780449	1	0.99991	0.995093	190.2	598.4	802.9	443	217	381.1	324.7	14.6	3.67	5.57	0.04	5.32		14.14	69.5	104.2	517.2
High	[K].SVIVCQHGIDR.[R]	1xCarbamidomethyl [C5]; 1xTMTpro [N-Term]	5.11004e-07	2.82963e-05	1	1	1	1	A2AAE1	A2AAE1 [958-968]	A2AAE1 1xCarbamidomethyl [C962]	Transmembrane protein KIAA1109 OS=Mus musculus OX=10090 GN=Kiaa1109 PE=1 SV=4	0	1587.86	0.47	2.013	0.605	1.442	0.656	0.344	0.397864	0.246168	0.569013	0.360799	0.598066	0.459798	0.996109	0.967205	0.999526	0.968507	0.99991	0.994122	89.1	381.5	114.6	273.3	124.3	189.5	65.1	12.63	3.17	19.45	6.29	21.27		16.53	32.1	49.5	330.9
High	[K].SVIVCQHGIDRR.[F]	1xCarbamidomethyl [C5]; 1xTMTpro [N-Term]	0.000430014	2.82963e-05	1	1	1	2	A2AAE1	A2AAE1 [958-969]	A2AAE1 1xCarbamidomethyl [C962]	Transmembrane protein KIAA1109 OS=Mus musculus OX=10090 GN=Kiaa1109 PE=1 SV=4	1	1743.96	0.591	2.064	0.909	1.524	0.753	1.005	0.538283	0.23269	0.834416	0.367698	0.865823	0.728027	0.996109	0.961577	0.999996	0.970545	0.999916	0.995093	122.8	429	189	316.9	156.6	207.9	209	14.13	2.67	5.83	4.76	7.1		23.87	36.6	82.5	373.4
High	[R].VDSEGTCAEQAPHFLLRPTSIR.[V]	1xCarbamidomethyl [C7]; 1xTMTpro [N-Term]	4.52893e-08	2.82963e-05	1	1	1	1	A2AAJ9	A2AAJ9 [98-119]	A2AAJ9 1xCarbamidomethyl [C104]	Obscurin OS=Mus musculus OX=10090 GN=Obscn PE=1 SV=3	1	2788.44	0.905	0.489	3.052	0.767	0.227	0.556	0.849812	0.265362	0.0332419	0.751353	0.0253078	0.873891	0.999984	0.973887	0.537678	1	0.415595	0.998045	148.2	80.1	500.1	125.7	37.2	163.8	91	28.73	10.68	6.49	2.63	15.11		15.05	60	73.3	76.6
High	[K].ADAGEYSCEAEGQK.[L]	1xCarbamidomethyl [C8]; 1xTMTpro [K14]; 1xTMTpro [N-Term]	7.70155e-07	2.82963e-05	1	1	1	1	A2AAJ9	A2AAJ9 [1388-1401]	A2AAJ9 1xCarbamidomethyl [C1395]	Obscurin OS=Mus musculus OX=10090 GN=Obscn PE=1 SV=3	0	2123.02	0.97	0.507	2.473	0.486	0.729	0.498	0.630048	0.390062	0.0262711	0.220075	0.702451	0.607426	0.996109	0.999596	0.486188	0.865894	0.99991	0.995093	269.9	141.2	688.3	135.2	202.9	278.3	138.7	52.33	0.75	16.79	1.83	2.16		17.16	131.1	111.2	124.6
High	[K].LSSSSKVRVEASGCSR.[R]	1xCarbamidomethyl [C14]; 1xTMTpro [K6]; 1xTMTpro [N-Term]	0.0100406	0.000605469	1	1	1	1	A2AAJ9	A2AAJ9 [1455-1470]; [1547-1562]; [1639-1654]; [1731-1746]; [1823-1838]; [1915-1930]; [2007-2022]; [2099-2114]	A2AAJ9 1xCarbamidomethyl [C1468]; 1xCarbamidomethyl [C1560]; 1xCarbamidomethyl [C1652]; 1xCarbamidomethyl [C1744]; 1xCarbamidomethyl [C1836]; 1xCarbamidomethyl [C1928]; 1xCarbamidomethyl [C2020]; 1xCarbamidomethyl [C2112]	Obscurin OS=Mus musculus OX=10090 GN=Obscn PE=1 SV=3	2	2318.27	1.028	0.376	3.224	0.273	0.272	0.423	0.551222	0.410035	0.116837	0.0486416	0.137786	0.58976	0.996109	0.999596	0.811869	0.454797	0.818352	0.995093	669.2	244.7	2099.5	177.7	176.9	651.2	275.6	46.51	9.76	11.14	9.5	2.48		5.26	310.2	289	232.6
High	[R].VEASGCSR.[R]	1xCarbamidomethyl [C6]; 1xTMTpro [N-Term]	0.000410911	2.82963e-05	1	1	1	2	A2AAJ9	A2AAJ9 [1463-1470]; [1555-1562]; [1647-1654]; [1739-1746]; [1831-1838]; [1923-1930]; [2015-2022]; [2107-2114]	A2AAJ9 1xCarbamidomethyl [C1468]; 1xCarbamidomethyl [C1560]; 1xCarbamidomethyl [C1652]; 1xCarbamidomethyl [C1744]; 1xCarbamidomethyl [C1836]; 1xCarbamidomethyl [C1928]; 1xCarbamidomethyl [C2020]; 1xCarbamidomethyl [C2112]	Obscurin OS=Mus musculus OX=10090 GN=Obscn PE=1 SV=3	0	1169.59	1.377	0.176	4.289	0.05	0.07	0.135	0.400423	0.0417712	0.241677	1.40951e-05	0.000524745	0.0580314	0.996109	0.739106	0.944014	0.00118982	0.0367549	0.752249	1246.2	159.1	3882.3	44.9	63.6	905.2	122.3	63.63	1.4	8.37	59.7	12.38		6.65	666.5	466.4	142.5
High	[K].ADAGEYSCEAR.[G]	1xCarbamidomethyl [C8]; 1xTMTpro [N-Term]	5.34834e-07	2.82963e-05	1	1	1	1	A2AAJ9	A2AAJ9 [2032-2042]	A2AAJ9 1xCarbamidomethyl [C2039]	Obscurin OS=Mus musculus OX=10090 GN=Obscn PE=1 SV=3	0	1532.7	1.435	0.116	5.829	0.056	0.029	0.113	0.378124	0.0103172	0.0703285	6.06851e-06	3.99786e-07	0.0410726	0.995733	0.507841	0.700675	0.000609771	0.000181424	0.667179	857.5	69.5	3484.4	33.3	17.2	597.7	67.7	54.65	2.08	1.59		17.65		11.14	424.6	346.6	62.6
High	[R].GAQVLDSAIYSCR.[V]	1xCarbamidomethyl [C12]; 1xTMTpro [N-Term]	1.01489e-09	2.82963e-05	1	1	1	2	A2AAJ9	A2AAJ9 [2213-2225]	A2AAJ9 1xCarbamidomethyl [C2224]	Obscurin OS=Mus musculus OX=10090 GN=Obscn PE=1 SV=3	0	1743.9	1.132	0.555	7.015	0.273	0.222	0.531	0.608364	0.63885	0.0848165	0.0831799	0.0671493	0.861631	0.996109	0.999952	0.736936	0.596017	0.633642	0.998045	817.5	400.9	5067.5	197	160.3	722.4	383.8	41.48	10.97	15.8	13.95	0.36		4.98	364.3	367.2	329
High	[R].TCTVTEGK.[H]	1xCarbamidomethyl [C2]; 1xTMTpro [K8]; 1xTMTpro [N-Term]	0.00013478	2.82963e-05	1	1	1	1	A2AAJ9	A2AAJ9 [244-251]	A2AAJ9 1xCarbamidomethyl [C245]	Obscurin OS=Mus musculus OX=10090 GN=Obscn PE=1 SV=3	0	1503.83	0.929	0.205	2.597	0.11	0.268	0.188	0.772019	0.124226	0.140771	0.00050531	0.148292	0.171089	0.999984	0.883468	0.846834	0.0190869	0.837441	0.943652	686.9	152	1921.4	81.3	198.2	739.7	139.2	45.55	12.41	15.44	37.34	13.67		1.31	316	298.9	147.2
High	[R].HCLVLR.[S]	1xCarbamidomethyl [C2]; 1xTMTpro [N-Term]	0.0294533	0.00206579	1	1	1	2	A2AAJ9	A2AAJ9 [2475-2480]	A2AAJ9 1xCarbamidomethyl [C2476]	Obscurin OS=Mus musculus OX=10090 GN=Obscn PE=1 SV=3	0	1101.65	1.883	0.371	3.156	0.27	0.242	0.63	0.244479	0.384742	0.295131	0.0608365	0.0975717	0.984521	0.951343	0.99924	0.96934	0.51286	0.731037	0.999948	1724.9	339.8	2891.2	247.4	222.1	916	577.3	49.61	2.89	1.67	5.21	15.39		24.02	819.6	726.6	307.6
High	[R].GFFGCETPDDK.[T]	1xCarbamidomethyl [C5]; 1xTMTpro [K11]; 1xTMTpro [N-Term]	2.06567e-05	2.82963e-05	1	1	1	1	A2AAJ9	A2AAJ9 [2488-2498]	A2AAJ9 1xCarbamidomethyl [C2492]	Obscurin OS=Mus musculus OX=10090 GN=Obscn PE=1 SV=3	0	1880.93	1.497	0.785	1.839	0.358	0.56	0.741	0.289711	0.944652	0.170402	0.167185	0.62348	0.84145	0.973307	0.999952	0.884188	0.796142	0.99991	0.997925	713.6	374	876.5	170.7	267	476.6	353.4	41.52	0.71	2.79	1.59	7.58		18.96	318.1	320.4	333.4
High	[K].VTLECELSRPVDVR.[W]	1xCarbamidomethyl [C5]; 1xTMTpro [N-Term]	9.2338e-06	2.82963e-05	1	1	1	2	A2AAJ9	A2AAJ9 [2616-2629]	A2AAJ9 1xCarbamidomethyl [C2620]	Obscurin OS=Mus musculus OX=10090 GN=Obscn PE=1 SV=3	1	1977.08	2.127	0.483	3.941	0.255	0.299	0.445	0.307224	0.500776	0.269578	0.0473417	0.179581	0.70666	0.977478	0.999596	0.957575	0.449009	0.889583	0.995093	1962.1	445.7	3636	235.5	276.3	922.7	410.9	48.54	1.9	0.11	12.69	7.31		9.98	924.3	833.7	400.7
High	[K].AIGIVAQGTCR.[S]	1xCarbamidomethyl [C10]; 1xTMTpro [N-Term]	3.28908e-07	2.82963e-05	1	1	1	2	A2AAJ9	A2AAJ9 [2642-2652]	A2AAJ9 1xCarbamidomethyl [C2651]	Obscurin OS=Mus musculus OX=10090 GN=Obscn PE=1 SV=3	0	1449.82	1.512	0.304	5.006	0.331	0.201	0.275	0.27613	0.171178	0.116149	0.190892	0.0522788	0.319771	0.967421	0.924486	0.810335	0.828256	0.568956	0.994122	966.5	194.5	3200	211.6	128.8	639.3	176.1	36.15	1.89	7.44	5.94	2.58		0.56	413.5	452.2	170.2
High	[R].GVLECQVSR.[A]	1xCarbamidomethyl [C5]; 1xTMTpro [N-Term]	3.7355e-05	2.82963e-05	1	1	1	1	A2AAJ9	A2AAJ9 [2739-2747]	A2AAJ9 1xCarbamidomethyl [C2743]	Obscurin OS=Mus musculus OX=10090 GN=Obscn PE=1 SV=3	0	1351.73	1.748	0.225	6.07	0.11	0.083	0.218	0.146843	0.019894	0.0265154	0.000174107	7.68838e-06	0.171471	0.857877	0.618038	0.487119	0.00861711	0.00180242	0.943652	781.1	100.5	2712.8	49.1	36.9	446.9	97.3	54.09	1.71	9.04	1.16	11.02		10.44	385	317.2	90.2
High	[R].ELQSVVLSCDFRPAPK.[A]	1xCarbamidomethyl [C9]; 1xTMTpro [K16]; 1xTMTpro [N-Term]	5.51335e-07	2.82963e-05	1	1	1	1	A2AAJ9	A2AAJ9 [2914-2929]	A2AAJ9 1xCarbamidomethyl [C2922]	Obscurin OS=Mus musculus OX=10090 GN=Obscn PE=1 SV=3	1	2454.37	1.755	0.405	3.642	0.431	0.333	0.595	0.299147	0.395442	0.174438	0.244319	0.241181	0.982608	0.975081	0.999596	0.888363	0.89127	0.94853	0.999948	1430.1	329.7	2966.7	351.3	271.5	814.7	484.3	31.46	1.51	4.14	6.14	2.4		5.38	590.7	693	295.6
High	[R].QADTGTVCATSPK.[V]	1xCarbamidomethyl [C8]; 1xTMTpro [K13]; 1xTMTpro [N-Term]	2.41083e-08	2.82963e-05	1	1	1	2	A2AAJ9	A2AAJ9 [3053-3065]	A2AAJ9 1xCarbamidomethyl [C3060]	Obscurin OS=Mus musculus OX=10090 GN=Obscn PE=1 SV=3	0	1944.04	1.031	0.608	3.05	0.332	0.318	0.424	0.601963	0.667428	0.0576303	0.199043	0.173306	0.703658	0.996109	0.999952	0.66358	0.8406	0.882863	0.995093	515.6	303.8	1525	166	159.1	500	211.8	37.22	9.54	10.42	9.11	3.54		11.67	222.4	239.3	288.3
High	[K].DATLSCQIVGNPTPHVSWEK.[D]	1xCarbamidomethyl [C6]; 1xTMTpro [K20]; 1xTMTpro [N-Term]	9.27988e-12	2.82963e-05	1	1	1	2	A2AAJ9	A2AAJ9 [25-44]	A2AAJ9 1xCarbamidomethyl [C30]	Obscurin OS=Mus musculus OX=10090 GN=Obscn PE=1 SV=3	0	2847.5	1.297	0.334	2.794	0.238	0.232	0.488	0.608979	0.293774	0.349559	0.0257225	0.0303865	0.723144	0.996109	0.982129	0.98674	0.31657	0.452637	0.995093	1430.9	368.3	3082	262.4	256.1	1103	537.9	41.89	4.84	10.67	4.58	0.82		1.6	639.7	640.7	338.1
High	[K].ALDDVSAEERGTLTLQCEVSDPEAR.[V]	1xCarbamidomethyl [C17]; 1xTMTpro [N-Term]	1.36261e-07	2.82963e-05	1	1	1	1	A2AAJ9	A2AAJ9 [3084-3108]	A2AAJ9 1xCarbamidomethyl [C3100]	Obscurin OS=Mus musculus OX=10090 GN=Obscn PE=1 SV=3	1	3065.5	1.075	0.854	4.767	0.776	0.795	1.679	0.566822	0.837234	0.00158662	0.892908	0.823434	0.254689	0.996109	0.999952	0.13264	1	0.99991	0.994088	199.3	158.2	883.4	143.9	147.3	185.3	311.1	20.02	3.21	16.28	3.06	9.2		6.5	75.7	105	137.2
High	[R].GTLTLQCEVSDPEAR.[V]	1xCarbamidomethyl [C7]; 1xTMTpro [N-Term]	2.60538e-10	2.82963e-05	1	1	1	2	A2AAJ9	A2AAJ9 [3094-3108]	A2AAJ9 1xCarbamidomethyl [C3100]	Obscurin OS=Mus musculus OX=10090 GN=Obscn PE=1 SV=3	0	1980	1.467	0.341	5.833	0.702	0.225	0.76	0.233157	0.219552	0.0300463	0.719826	0.0433343	0.833268	0.945895	0.955973	0.514942	1	0.527078	0.997925	677.5	157.5	2693.9	324.4	103.8	461.8	351.1	39.83	10.75	14.76	17.9	4.09		17.2	298.1	308.2	129.5
High	[R].GLTVHDLSHEDAGLYTCQVGSK.[E]	1xCarbamidomethyl [C17]; 1xTMTpro [K22]; 1xTMTpro [N-Term]	0.0537189	0.00388994	1	1	1	1	A2AAJ9	A2AAJ9 [3134-3155]	A2AAJ9 1xCarbamidomethyl [C3150]	Obscurin OS=Mus musculus OX=10090 GN=Obscn PE=1 SV=3	0	2995.54	1.307	0.566	3.166	0.553	0.564	2.013	0.418855	0.719318	0.0797373	0.50415	0.670936	0.199339	0.996109	0.999952	0.721667	1	0.99991	0.962318	818.9	354.6	1983.6	346.6	353.3	626.6	1261.2	40.93	0.74	0.31	4.7	33.99		12.53	363.4	369.4	312.9
High	[R].TTLGEDVMLSCELSR.[A]	1xCarbamidomethyl [C11]; 1xTMTpro [N-Term]	1.12692e-07	2.82963e-05	1	1	1	2	A2AAJ9	A2AAJ9 [3270-3284]	A2AAJ9 1xCarbamidomethyl [C3280]	Obscurin OS=Mus musculus OX=10090 GN=Obscn PE=1 SV=3	0	2015.01	1.381	0.848	2.89	0.706	0.675	1.191	0.324031	0.925973	0.0548444	0.716957	0.736201	0.467815	0.985066	0.999952	0.650912	1	0.99991	0.994122	438.6	269.4	917.7	224.3	214.4	317.5	378.2	30.67	6.26	0.45	9.55	13.31		4.28	180.1	213.8	228.6
High	[R].TDSDTYTCDIGQAR.[T]	1xCarbamidomethyl [C8]; 1xTMTpro [N-Term]	1.14511e-08	2.82963e-05	1	1	1	2	A2AAJ9	A2AAJ9 [3412-3425]	A2AAJ9 1xCarbamidomethyl [C3419]	Obscurin OS=Mus musculus OX=10090 GN=Obscn PE=1 SV=3	0	1906.88	1.994	0.519	2.902	0.22	0.251	0.728	0.143675	0.536341	0.0522848	0.0212687	0.0932838	0.906098	0.851425	0.999952	0.639424	0.28329	0.719228	0.998563	1053.7	274.5	1533.7	116.5	132.8	528.5	384.6	51.59	9.37	4.49	7.99	11.74		25.23	508.8	436.8	260.2
High	[R].EKESATFQCEVAQPATEAAWFKEETR.[L]	1xCarbamidomethyl [C9]; 2xTMTpro [K2; K22]; 1xTMTpro [N-Term]	4.71199e-10	2.82963e-05	1	1	1	1	A2AAJ9	A2AAJ9 [344-369]	A2AAJ9 1xCarbamidomethyl [C352]	Obscurin OS=Mus musculus OX=10090 GN=Obscn PE=1 SV=3	2	3956.03	0.836	0.441	3.841	0.205	0.209	0.663	0.787813	0.354625	0.0152411	0.0173907	0.0341146	0.952669	0.999984	0.994323	0.378911	0.249478	0.478791	0.999948	420	221.7	1929.6	103.2	104.9	502.4	332.9	32.48	2.82	15.88	13.92	11.83		12.4	174.8	202	200.6
High	[R].YKCEIGGASSSSIVR.[V]	1xCarbamidomethyl [C3]; 1xTMTpro [K2]; 1xTMTpro [N-Term]	1.97711e-07	2.82963e-05	1	1	1	1	A2AAJ9	A2AAJ9 [3597-3611]	A2AAJ9 1xCarbamidomethyl [C3599]	Obscurin OS=Mus musculus OX=10090 GN=Obscn PE=1 SV=3	1	2222.21	0.789	0.258	3.243	0.208	0.106	0.271	0.982704	0.154708	0.3788	0.012315	0.00101588	0.271001	0.999984	0.91228	0.991802	0.198295	0.0611805	0.994122	894.5	292.2	3679.1	236.4	120	1134.4	307.8	44.44	9.03	12	3.77	5		16.34	407.9	392.6	276.3
High	[R].CVLSSVAAPVEWR.[H]	1xCarbamidomethyl [C1]; 1xTMTpro [N-Term]	3.41641e-07	2.82963e-05	1	1	1	1	A2AAJ9	A2AAJ9 [3638-3650]	A2AAJ9 1xCarbamidomethyl [C3638]	Obscurin OS=Mus musculus OX=10090 GN=Obscn PE=1 SV=3	0	1777.96	0.879	0.731	2.497	0.689	0.481	0.447	0.848733	0.636274	0.0523186	0.714155	0.307739	0.662093	0.999984	0.999952	0.639424	1	0.981188	0.995093	142.4	118.5	404.6	111.7	77.9	162.1	72.5	26.69	7.49	0.11	8.08	10.83		8.84	56.8	71.5	110.8
High	[K].EATEGTTVTLRCELTK.[E]	1xCarbamidomethyl [C12]; 1xTMTpro [K16]; 1xTMTpro [N-Term]	1.3019e-07	2.82963e-05	1	1	1	1	A2AAJ9	A2AAJ9 [3716-3731]	A2AAJ9 1xCarbamidomethyl [C3727]	Obscurin OS=Mus musculus OX=10090 GN=Obscn PE=1 SV=3	1	2417.32	0.832	0.313	3.923	0.062	0.042	0.193	0.993731	0.247089	0.33394	6.23873e-06	6.63035e-07	0.163215	0.999984	0.967205	0.984068	0.000620407	0.000263741	0.939829	1078.4	405.6	5082.6	80.7	55	1295.5	250.3	57.04	16.78	15.47		3.76		0.97	544.8	427.3	405.4
High	[R].YSLKQDGAVCELQIR.[S]	1xCarbamidomethyl [C10]; 1xTMTpro [K4]; 1xTMTpro [N-Term]	6.33162e-09	2.82963e-05	1	1	1	1	A2AAJ9	A2AAJ9 [3838-3852]	A2AAJ9 1xCarbamidomethyl [C3847]	Obscurin OS=Mus musculus OX=10090 GN=Obscn PE=1 SV=3	1	2388.32	0.886	0.378	5.03	0.232	0.186	0.567	0.796539	0.362992	0.110247	0.0451837	0.0478303	0.856486	0.999984	0.996752	0.798005	0.437972	0.550392	0.998045	633.9	270.8	3600.6	166	133.3	715.7	406.1	42.35	7.42	8.7	7.13	7.81		4.1	284.4	282.8	253.2
High	[KR].QDGAVCELQIR.[SGD]	1xCarbamidomethyl [C6]; 1xTMTpro [N-Term]	0.000980194	5.93436e-05	1	1	1	1	A2AAJ9	A2AAJ9 [3842-3852]; [4018-4028]; [4531-4541]	A2AAJ9 1xCarbamidomethyl [C3847]; 1xCarbamidomethyl [C4023]; 1xCarbamidomethyl [C4536]	Obscurin OS=Mus musculus OX=10090 GN=Obscn PE=1 SV=3	0	1592.84	0.994	0.757	2.142	0.879	1.402	1.17	0.721821	0.912622	0.233044	0.913934	0.627225	0.394666	0.99964	0.999952	0.9374	1	0.99991	0.994122	844.9	643.8	1820.9	747.2	1192.1	850.1	994.8	7.11	1.71	5.62	14.63	19.66		10.19	292.7	488.2	578
High	[R].NVSADDDAVYICETTEGSR.[T]	1xCarbamidomethyl [C12]; 1xTMTpro [N-Term]	3.5662e-13	2.82963e-05	1	1	1	2	A2AAJ9	A2AAJ9 [391-409]	A2AAJ9 1xCarbamidomethyl [C402]	Obscurin OS=Mus musculus OX=10090 GN=Obscn PE=1 SV=3	0	2406.11	1.562	0.232	3.986	0.149	0.197	0.32	0.291157	0.107238	0.197789	0.00570426	0.059459	0.414174	0.973728	0.861865	0.912596	0.116137	0.600734	0.994122	1209.4	179.7	3086.2	115.7	152.5	774.3	248.1	54.1	5.24	4.27	3.58	0.3		7.38	596.1	491.1	165.4
High	[R].QEGNLCELQIR.[D]	1xCarbamidomethyl [C6]; 1xTMTpro [N-Term]	1.22514e-07	2.82963e-05	1	1	1	1	A2AAJ9	A2AAJ9 [4707-4717]	A2AAJ9 1xCarbamidomethyl [C4712]	Obscurin OS=Mus musculus OX=10090 GN=Obscn PE=1 SV=3	0	1663.88	1.047	0.566	3.022	0.478	0.414	0.763	0.568856	0.483077	0.0322717	0.35451	0.270075	0.846944	0.996109	0.999596	0.529427	0.965346	0.965794	0.997925	389.5	210.3	1123.8	177.7	154.1	371.8	283.8	30.56	3.81	6.62	6.01	1.42		9.79	159.8	190	181.6
High	[R].QDGAVCELEIR.[D]	1xCarbamidomethyl [C6]; 1xTMTpro [N-Term]	2.23263e-07	2.82963e-05	1	1	1	1	A2AAJ9	A2AAJ9 [4795-4805]	A2AAJ9 1xCarbamidomethyl [C4800]	Obscurin OS=Mus musculus OX=10090 GN=Obscn PE=1 SV=3	0	1593.82	7.049	0.213	1.622	0.124	0.147	0.328	0.1251	0.115856	0.2891	0.00272704	0.0190654	0.415594	0.820587	0.870396	0.96844	0.0675366	0.360286	0.994122	5229.3	157.9	1203.4	91.9	109	741.9	243.2	52.49	7.23	12.85	7.91	13.15			2543.7	2151.8	147.4
High	[R].QQGCVAELLLR.[D]	1xCarbamidomethyl [C4]; 1xTMTpro [N-Term]	7.08415e-07	2.82963e-05	1	1	1	1	A2AAJ9	A2AAJ9 [4884-4894]	A2AAJ9 1xCarbamidomethyl [C4887]	Obscurin OS=Mus musculus OX=10090 GN=Obscn PE=1 SV=3	0	1590.9	1.113	0.465	4.1	0.339	0.331	0.677	0.554773	0.536487	0.133015	0.141766	0.218776	0.937503	0.996109	0.999952	0.83799	0.746552	0.929026	0.999948	737.5	308.1	2716.2	224.7	219.2	662.5	448.7	35.67	1.28	1.3	5.31	4.61		7.56	314.4	346.3	270.8
High	[R].TTTQFCVSAPR.[R]	1xCarbamidomethyl [C6]; 1xTMTpro [N-Term]	2.33675e-07	2.82963e-05	1	1	1	2	A2AAJ9	A2AAJ9 [497-507]	A2AAJ9 1xCarbamidomethyl [C502]	Obscurin OS=Mus musculus OX=10090 GN=Obscn PE=1 SV=3	0	1571.82	2.028	0.193	3.38	0.16	0.117	0.128	0.439017	0.0823199	0.359735	0.00243236	0.00374917	0.0202504	0.996109	0.829749	0.989327	0.0619531	0.139008	0.478049	2507.2	238.6	4179.5	197.9	144.3	1236.4	158.4	50.46	3.26	4.97	11.57	18.77		74.07	1199.6	1048.9	216.6
High	[R].QGAVCELLIHGLEAK.[D]	1xCarbamidomethyl [C5]; 1xTMTpro [K15]; 1xTMTpro [N-Term]	8.25332e-08	2.82963e-05	1	1	1	1	A2AAJ9	A2AAJ9 [5065-5079]	A2AAJ9 1xCarbamidomethyl [C5069]	Obscurin OS=Mus musculus OX=10090 GN=Obscn PE=1 SV=3	0	2246.28	1.49	0.686	2.243	0.53	0.703	1.242	0.297376	0.844242	0.143379	0.480442	0.797511	0.414938	0.974428	0.999952	0.851317	1	0.99991	0.994122	986.4	454.1	1484.9	350.5	465.5	661.9	822.1	32.2	0.5	8.19	2.55	2.24		4.57	409.7	475.4	401.4
High	[K].DTGEYACLVGGQK.[T]	1xCarbamidomethyl [C7]; 1xTMTpro [K13]; 1xTMTpro [N-Term]	4.22964e-08	2.82963e-05	1	1	1	2	A2AAJ9	A2AAJ9 [5080-5092]	A2AAJ9 1xCarbamidomethyl [C5086]	Obscurin OS=Mus musculus OX=10090 GN=Obscn PE=1 SV=3	0	2006.05	0.939	0.493	2.762	0.431	0.292	0.504	0.724934	0.503982	0.281358	0.194187	0.149908	0.705645	0.999984	0.999596	0.964657	0.831677	0.839733	0.995093	855.5	449.2	2515.5	392.9	265.5	910.9	459	43.02	1.43	16.15	1.67	0.22		14.61	385.8	379.7	402.5
High	[R].SDHSVTLSWVAPMSDGGGGLCGYR.[V]	1xCarbamidomethyl [C21]; 1xTMTpro [N-Term]	2.64309e-09	2.82963e-05	1	1	1	1	A2AAJ9	A2AAJ9 [5481-5504]	A2AAJ9 1xCarbamidomethyl [C5501]	Obscurin OS=Mus musculus OX=10090 GN=Obscn PE=1 SV=3	0	2813.33	1.657	0.796	1.774	0.634	0.932	0.844	0.204665	0.940376	0.150116	0.642428	0.84817	0.708518	0.922684	0.999952	0.860979	1	0.99991	0.995093	559.5	268.9	599.2	213.9	314.7	337.7	284.9	4.3	3.77	0.23	2.03	3.41		0.72	190	329.8	232.3
High	[R].YTCQVSTK.[S]	1xCarbamidomethyl [C3]; 1xTMTpro [K8]; 1xTMTpro [N-Term]	0.000305781	2.82963e-05	1	1	1	1	A2AAJ9	A2AAJ9 [5918-5925]	A2AAJ9 1xCarbamidomethyl [C5920]	Obscurin OS=Mus musculus OX=10090 GN=Obscn PE=1 SV=3	0	1594.88	0.384	0.378	2.76	0.113	0.209	0.14	0.271998	0.414164	0.286171	0.000205698	0.0647184	0.0816979	0.965783	0.999596	0.967309	0.00983354	0.625255	0.817487	367.8	362.6	2646.3	108.2	200.6	958.9	134.1	56.65	10.38	16.1	24.96	4.39		2.22	185.2	146.2	346.2
High	[K].TPGLQTSDAAPVFLTELQNQDVQDGYPMSFDCVVTGQPVPSVR.[W]	1xCarbamidomethyl [C32]; 1xTMTpro [N-Term]	8.85185e-10	2.82963e-05	1	1	1	1	A2AAJ9	A2AAJ9 [6067-6109]	A2AAJ9 1xCarbamidomethyl [C6098]	Obscurin OS=Mus musculus OX=10090 GN=Obscn PE=1 SV=3	0	4968.44	1.439	0.915	2.982	0.498	0.775	2.089	0.273892	0.903107	0.02602	0.409135	0.838791	0.1835	0.965783	0.999952	0.484324	0.98822	0.99991	0.951593	207.1	131.6	429.1	71.7	111.5	143.9	300.7	43.31	2.23	0.84	1.29	22.1		0.89	93.6	91.7	118.6
High	[R].CLAENSMGVSSTK.[A]	1xCarbamidomethyl [C1]; 1xTMTpro [K13]; 1xTMTpro [N-Term]	7.39894e-05	2.82963e-05	1	1	1	1	A2AAJ9	A2AAJ9 [6150-6162]	A2AAJ9 1xCarbamidomethyl [C6150]	Obscurin OS=Mus musculus OX=10090 GN=Obscn PE=1 SV=3	0	1992.04	1.026	1.032	1.68	1.258	0.849	1.188	0.565953	0.732866	0.148935	0.555044	0.912865	0.47836	0.996109	0.999952	0.858997	1	0.999916	0.994122	388.8	390.7	636.4	476.7	321.4	378.8	449.8	23.27	3.91	6.08	7.77	1.8		2.25	151.2	200.1	356.3
High	[K].EICGIQQR.[L]	1xCarbamidomethyl [C3]; 1xTMTpro [N-Term]	0.000599932	2.82963e-05	1	1	1	1	A2AAJ9	A2AAJ9 [6947-6954]	A2AAJ9 1xCarbamidomethyl [C6949]	Obscurin OS=Mus musculus OX=10090 GN=Obscn PE=1 SV=3	0	1307.71	1.605	0.163	4.136	0.077	0.065	0.187	0.284528	0.046974	0.114379	0.000226668	9.07859e-05	0.136884	0.970311	0.74895	0.805673	0.0105082	0.0111396	0.909669	1033.9	105.3	2664.4	49.5	41.7	644.2	120.1	44.19	3.01	3.71		4.84		15.92	470.6	454.7	95.4
High	[R].ATPFVEGEDAQITCTVEGAPYPQIR.[W]	1xCarbamidomethyl [C14]; 1xTMTpro [N-Term]	1.70402e-11	2.82963e-05	1	1	1	2	A2AAJ9	A2AAJ9 [7065-7089]	A2AAJ9 1xCarbamidomethyl [C7078]	Obscurin OS=Mus musculus OX=10090 GN=Obscn PE=1 SV=3	0	3053.52	0.996	0.895	3.697	0.531	0.472	0.862	0.642595	0.827724	0.0265603	0.500592	0.446142	0.727079	0.996109	0.999952	0.487343	1	0.99991	0.995093	445.6	400.6	1654.4	237.5	211.1	447.5	385.8	13.19	5.38	5.07	5.64	2.61		9.88	161.2	246.6	342.1
High	[K].EDLGHYECELVNR.[L]	1xCarbamidomethyl [C8]; 1xTMTpro [N-Term]	6.03956e-07	2.82963e-05	1	1	1	1	A2AAJ9	A2AAJ9 [7124-7136]	A2AAJ9 1xCarbamidomethyl [C7131]	Obscurin OS=Mus musculus OX=10090 GN=Obscn PE=1 SV=3	0	1937.93	1.947	0.777	1.798	0.361	0.278	0.762	0.255977	0.993409	0.227894	0.0882725	0.145893	0.841954	0.96173	0.999952	0.934327	0.612495	0.833172	0.997925	1517.2	605.6	1401.3	281.5	216.5	779.4	593.6	31.81	3.08	0.04	6.42	3.49		10.11	628.3	733.3	525.6
High	[R].DVAQDDAGLYECVSR.[G]	1xCarbamidomethyl [C12]; 1xTMTpro [N-Term]	1.25647e-10	2.82963e-05	1	1	1	2	A2AAJ9	A2AAJ9 [765-779]	A2AAJ9 1xCarbamidomethyl [C776]	Obscurin OS=Mus musculus OX=10090 GN=Obscn PE=1 SV=3	0	2001.95	1.785	0.253	5.028	0.156	0.122	0.218	0.418256	0.117562	0.219321	0.00491825	0.00742828	0.17052	0.996109	0.872878	0.927486	0.104944	0.209018	0.943652	1946.2	276.2	5481.8	169.8	133.3	1090.3	237.3	47.44	1.21	0.34	33.68	11.26		34.06	908.8	834.2	242.9
High	[R].MEASGCSR.[R]	1xCarbamidomethyl [C6]; 1xTMTpro [N-Term]	0.000129761	2.82963e-05	1	1	1	1	A2AAJ9	A2AAJ9 [911-918]; [1003-1010]; [1095-1102]; [1187-1194]; [1279-1286]; [1371-1378]	A2AAJ9 1xCarbamidomethyl [C916]; 1xCarbamidomethyl [C1008]; 1xCarbamidomethyl [C1100]; 1xCarbamidomethyl [C1192]; 1xCarbamidomethyl [C1284]; 1xCarbamidomethyl [C1376]	Obscurin OS=Mus musculus OX=10090 GN=Obscn PE=1 SV=3	0	1201.56	1.032	0.126	5.243	0.047	0.035	0.198	0.492501	0.00541825	0.0875067	2.97275e-06	3.90466e-07	0.164785	0.996109	0.397851	0.746285	0.00035085	0.000179726	0.939829	571	69.8	2901.5	26.2	19.4	553.5	109.6	63.2	18.08	4.04		7.57		15.92	304.2	214.5	70.4
High	[K].ADAGEYSCEAGGQK.[L]	1xCarbamidomethyl [C8]; 1xTMTpro [K14]; 1xTMTpro [N-Term]	1.42968e-10	2.82963e-05	1	1	1	2	A2AAJ9	A2AAJ9 [928-941]; [1020-1033]; [1112-1125]; [1204-1217]; [1296-1309]; [1480-1493]; [1572-1585]; [1664-1677]; [1756-1769]; [1848-1861]; [1940-1953]; [2124-2137]	A2AAJ9 1xCarbamidomethyl [C935]; 1xCarbamidomethyl [C1027]; 1xCarbamidomethyl [C1119]; 1xCarbamidomethyl [C1211]; 1xCarbamidomethyl [C1303]; 1xCarbamidomethyl [C1487]; 1xCarbamidomethyl [C1579]; 1xCarbamidomethyl [C1671]; 1xCarbamidomethyl [C1763]; 1xCarbamidomethyl [C1855]; 1xCarbamidomethyl [C1947]; 1xCarbamidomethyl [C2131]	Obscurin OS=Mus musculus OX=10090 GN=Obscn PE=1 SV=3	0	2051	0.899	0.271	3.187	0.047	0.049	0.281	0.814682	0.215545	0.526244	1.45323e-08	2.35034e-05	0.268454	0.999984	0.953189	0.999526	5.85289e-06	0.00418387	0.994122	2123.8	639.8	7531.8	111.1	115	2363.4	664.1	59.9	15.07	18.69	36.52	7.93		10.79	1099.4	821.2	631.6
High	[K].ADAGEYSCEAGGQKLSFR.[L]	1xCarbamidomethyl [C8]; 1xTMTpro [K14]; 1xTMTpro [N-Term]	1.54251e-10	2.82963e-05	1	1	1	1	A2AAJ9	A2AAJ9 [928-945]; [1020-1037]; [1112-1129]; [1204-1221]; [1480-1497]; [1572-1589]; [1664-1681]; [1756-1773]; [1940-1957]; [2124-2141]	A2AAJ9 1xCarbamidomethyl [C935]; 1xCarbamidomethyl [C1027]; 1xCarbamidomethyl [C1119]; 1xCarbamidomethyl [C1211]; 1xCarbamidomethyl [C1487]; 1xCarbamidomethyl [C1579]; 1xCarbamidomethyl [C1671]; 1xCarbamidomethyl [C1763]; 1xCarbamidomethyl [C1947]; 1xCarbamidomethyl [C2131]	Obscurin OS=Mus musculus OX=10090 GN=Obscn PE=1 SV=3	1	2554.29	0.704	0.358	5.386	0.094	0.063	0.179	0.932502	0.245854	0.0760545	0.00018863	0.00037247	0.114034	0.999984	0.967205	0.716155	0.00919464	0.0294864	0.880902	415	211.1	3174.8	55.1	37.3	589.5	105.4	64.37	5	11.91		0.86		5.57	223.4	154.3	194
High	[K].AEAGASATLSCEVAQAQTEVTWFK.[D]	1xCarbamidomethyl [C11]; 1xTMTpro [K24]; 1xTMTpro [N-Term]	0.0729513	0.00498168	1	1	1	1	A2AAJ9	A2AAJ9 [967-990]; [1059-1082]; [1335-1358]; [1427-1450]; [1519-1542]; [1611-1634]; [1703-1726]; [1795-1818]; [1887-1910]; [1979-2002]	A2AAJ9 1xCarbamidomethyl [C977]; 1xCarbamidomethyl [C1069]; 1xCarbamidomethyl [C1345]; 1xCarbamidomethyl [C1437]; 1xCarbamidomethyl [C1529]; 1xCarbamidomethyl [C1621]; 1xCarbamidomethyl [C1713]; 1xCarbamidomethyl [C1805]; 1xCarbamidomethyl [C1897]; 1xCarbamidomethyl [C1989]	Obscurin OS=Mus musculus OX=10090 GN=Obscn PE=1 SV=3	0	3163.62	1.091	1.663	1.451	0.645	0.73	2.029	0.461848	0.29784	0.255381	0.627468	0.87108	0.139142	0.996109	0.985581	0.951538	1	0.999916	0.911855	411.7	627.3	547.2	243.3	275.3	377.2	765.4	14.12	6.62	2.94	0.9	4.66		0.49	149.9	226.3	531
High	[R].VIEDLEDTAVQEGSSAKFCCR.[I]	2xCarbamidomethyl [C19; C20]; 1xTMTpro [K17]; 1xTMTpro [N-Term]	9.42195e-12	2.82963e-05	1	1	1	2	A2AAJ9	A2AAJ9 [3439-3459]	A2AAJ9 2xCarbamidomethyl [C3457; C3458]	Obscurin OS=Mus musculus OX=10090 GN=Obscn PE=1 SV=3	1	3022.51	0.595	0.502	4.521	0.285	0.296	0.662	0.656676	0.493718	0.266905	0.0475479	0.111753	0.875349	0.996109	0.999596	0.956346	0.450426	0.766231	0.998045	689	582	5237.7	330.4	343.5	1158.6	767.3	31.14	1.6	1.33	2.45	5.02		2.26	283.9	334.7	510.5
High	[R].CQLSHEGCQAQLLITATTPQDGGR.[Y]	2xCarbamidomethyl [C1; C8]; 1xTMTpro [N-Term]	3.26955e-09	2.82963e-05	1	1	1	1	A2AAJ9	A2AAJ9 [3573-3596]	A2AAJ9 2xCarbamidomethyl [C3573; C3580]	Obscurin OS=Mus musculus OX=10090 GN=Obscn PE=1 SV=3	0	2945.45	0.725	0.728	2.339	0.84	0.787	1.438	0.8173	0.652335	0.0855792	0.996493	0.854931	0.381028	0.999984	0.999952	0.739033	1	0.99991	0.994122	130.9	131.5	422.6	151.7	142.1	180.7	259.8	13.89	4.22	2.71	12.1	9.06		9.78	47.6	72.1	120.2
High	[R].SLTIADAGEYLCTCGQEK.[T]	2xCarbamidomethyl [C12; C14]; 1xTMTpro [K18]; 1xTMTpro [N-Term]	1.19852e-08	2.82963e-05	1	1	1	1	A2AAJ9	A2AAJ9 [3853-3870]	A2AAJ9 2xCarbamidomethyl [C3864; C3866]	Obscurin OS=Mus musculus OX=10090 GN=Obscn PE=1 SV=3	0	2624.32	0.463	0.457	3.039	0.315	0.289	0.649	0.425615	0.480716	0.151058	0.100881	0.135839	0.996899	0.996109	0.999596	0.861595	0.65086	0.814262	0.999948	326.8	322.7	2146.1	222.4	204.3	706.1	458	28.33	4.24	11.28	9.36	3.13		5.42	131.9	162.1	295
High	[R].GLTIEDSGEYTCVCGQEK.[T]	2xCarbamidomethyl [C12; C14]; 1xTMTpro [K18]; 1xTMTpro [N-Term]	9.39877e-09	2.82963e-05	1	1	1	1	A2AAJ9	A2AAJ9 [4102-4119]	A2AAJ9 2xCarbamidomethyl [C4113; C4115]	Obscurin OS=Mus musculus OX=10090 GN=Obscn PE=1 SV=3	0	2654.29	0.616	0.527	4.196	0.303	0.302	0.793	0.665244	0.395746	0.00465558	0.0825406	0.0692698	0.880148	0.996109	0.999596	0.223204	0.594293	0.642103	0.998045	179.9	154.1	1226.2	88.6	88.2	292.2	231.8	30.19	0.5	0.64	1.79	2.05		7.9	73.6	88	137.2
High	[R].DLAVEDAGEYLCVCGQEK.[T]	2xCarbamidomethyl [C12; C14]; 1xTMTpro [K18]; 1xTMTpro [N-Term]	3.74864e-09	2.82963e-05	1	1	1	2	A2AAJ9	A2AAJ9 [4542-4559]	A2AAJ9 2xCarbamidomethyl [C4553; C4555]	Obscurin OS=Mus musculus OX=10090 GN=Obscn PE=1 SV=3	0	2664.31	0.479	0.602	2.303	0.423	0.506	0.637	0.455155	0.77108	0.207667	0.278392	0.520467	0.979745	0.996109	0.999952	0.920856	0.922617	0.99991	0.999948	376.7	473.8	1811.5	332.9	398.2	786.6	500.9	22.33	7.23	14.9	9.05	6.17		5.99	145.5	195.2	442.3
High	[R].DLAVEDTEEYSCVCGQEK.[T]	2xCarbamidomethyl [C12; C14]; 1xTMTpro [K18]; 1xTMTpro [N-Term]	1.02263e-09	2.82963e-05	1	1	1	1	A2AAJ9	A2AAJ9 [4718-4735]	A2AAJ9 2xCarbamidomethyl [C4729; C4731]	Obscurin OS=Mus musculus OX=10090 GN=Obscn PE=1 SV=3	0	2740.29	0.366	0.503	2.395	0.367	0.323	0.787	0.319148	0.484853	0.102989	0.242883	0.181927	0.748841	0.983387	0.999596	0.782526	0.889586	0.892801	0.995093	177.9	244.3	1163.8	178.2	157.2	485.9	382.5	16.11	14.78	16.06	0.52	2.44		10.8	65.7	96.4	240.7
High	[R].DLTVEDTGEYSCTCGQER.[T]	2xCarbamidomethyl [C12; C14]; 1xTMTpro [N-Term]	1.51801e-09	2.82963e-05	1	1	1	1	A2AAJ9	A2AAJ9 [4806-4823]	A2AAJ9 2xCarbamidomethyl [C4817; C4819]	Obscurin OS=Mus musculus OX=10090 GN=Obscn PE=1 SV=3	0	2424.06	0.796	1.371	1.755	0.558	0.64	1.786	0.895258	0.53793	0.198107	0.457183	0.656088	0.227015	0.999984	0.999952	0.912754	1	0.99991	0.978517	113.8	196	250.9	79.8	91.5	143	255.3	9.56	12.82	2.24	3.08	1.86		3.78	40.1	64.6	190.4
High	[K].ELIELCSGR.[G]	1xCarbamidomethyl [C6]; 1xTMTpro [N-Term]	0.000523556	2.82963e-05	1	1	1	1	A2ABU4	A2ABU4 [144-152]	A2ABU4 1xCarbamidomethyl [C149]	Myomesin-3 OS=Mus musculus OX=10090 GN=Myom3 PE=1 SV=1	0	1380.75	7.085	0.38	0.752	0.523	0.703	0.593	0.0203208	0.294366	0.919193	0.383188	0.902299	0.945364	0.363741	0.982438	0.999996	0.976372	0.999916	0.999948	3626.8	194.3	385.1	267.7	359.7	511.9	303.4	37.25	11.13	22.14	1.57	6.42			1564.7	1682.7	159.3
High	[K].EPFSLTCLFSDDVLEAEQR.[I]	1xCarbamidomethyl [C7]; 1xTMTpro [N-Term]	1.15385e-08	2.82963e-05	1	1	1	1	A2ABU4	A2ABU4 [286-304]	A2ABU4 1xCarbamidomethyl [C292]	Myomesin-3 OS=Mus musculus OX=10090 GN=Myom3 PE=1 SV=1	0	2560.26	2.767	1.471	0.855	0.883	1.219	1.425	0.021786	0.465724	0.883618	0.952496	0.536578	0.363859	0.376783	0.999596	0.999996	1	0.99991	0.994122	300.5	159.7	92.8	95.9	132.4	108.6	154.7	23.06	6.94	6.07	15.16	9.67		20.54	116.7	154.9	134.9
High	[R].CLNVHR.[D]	1xCarbamidomethyl [C1]; 1xTMTpro [N-Term]	0.00961194	0.000605469	1	1	1	1	A2ABU4	A2ABU4 [382-387]	A2ABU4 1xCarbamidomethyl [C382]	Myomesin-3 OS=Mus musculus OX=10090 GN=Myom3 PE=1 SV=1	0	1102.61	10.806	0.465	0.482	0.64	0.557	1.223	7.59464e-06	0.0869467	0.268534	0.600893	0.346739	0.383354	0.00150122	0.834999	0.95699	1	0.987609	0.994122	428.1	18.4	19.1	25.3	22.1	39.6	48.5	49.71	7.91	10.86	34.89	4.93		4.89	203.6	180.2	17.3
High	[R].TNTAYQCFSILPQSSTHIR.[L]	1xCarbamidomethyl [C7]; 1xTMTpro [N-Term]	9.55049e-10	2.82963e-05	1	1	1	1	A2ABV5	A2ABV5 [903-921]	A2ABV5 1xCarbamidomethyl [C909]	Mediator of RNA polymerase II transcription subunit 14 OS=Mus musculus OX=10090 GN=Med14 PE=1 SV=1	0	2528.29	0.897	1.235	1.249	0.965	1.01	1.82	0.763963	0.583322	0.337267	0.876895	0.710237	0.141371	0.999984	0.999952	0.984191	1	0.99991	0.914169	417	574.2	581	448.8	469.9	465	846.3	9.2	1.29	1.19	7.76	0.08		11.44	146.6	237.4	504.7
High	[R].AALEDSHSGFHLCSATLR.[W]	1xCarbamidomethyl [C13]; 1xTMTpro [N-Term]	2.56188e-08	2.82963e-05	1	1	1	1	A2ACJ2	A2ACJ2 [715-732]	A2ACJ2 1xCarbamidomethyl [C727]	Fanconi anemia core complex-associated protein 100 OS=Mus musculus OX=10090 GN=Faap100 PE=2 SV=1	0	2276.14	0.799	1.976	1.274	1.322	1.245	0.639	0.962556	0.212696	0.464754	0.458183	0.475173	0.990396	0.999984	0.952827	0.999091	1	0.99991	0.999948	95.1	235.1	151.5	157.3	148.1	119	76.1	17.58	10.41	14.96	11.57	4.6		26.36	35.5	51	193.7
High	[R].TAIECLVVVPVSQASANQR.[A]	1xCarbamidomethyl [C5]; 1xTMTpro [N-Term]	0.00131497	5.93436e-05	1	1	1	1	A2ACQ1	A2ACQ1 [372-390]	A2ACQ1 1xCarbamidomethyl [C376]	RNA helicase OS=Mus musculus OX=10090 GN=Dhx35 PE=1 SV=1	0	2346.28	1.678	1.059	1.474	0.827	1.022	1.75	0.204033	0.691575	0.296823	0.920542	0.788008	0.226761	0.922456	0.999952	0.970254	1	0.99991	0.978336	1003.9	633.5	881.5	494.7	611.6	598.2	1047	0.13	1.12	6.44	2.17	2.35		1.01	331	609.4	557.5
High	[K].SSQWCQEHFLNYK.[G]	1xCarbamidomethyl [C5]; 1xTMTpro [K13]; 1xTMTpro [N-Term]	5.17812e-05	2.82963e-05	1	1	1	1	A2ACQ1	A2ACQ1 [561-573]	A2ACQ1 1xCarbamidomethyl [C565]	RNA helicase OS=Mus musculus OX=10090 GN=Dhx35 PE=1 SV=1	0	2335.18	0.643	0.666	0.561	1.79	0.939	0.417	0.736087	0.805925	0.64954	0.380753	0.904121	0.617134	0.999984	0.999952	0.999996	0.975089	0.999916	0.995093	603.3	625	526.5	1679.1	881.1	938.1	391.5	6.45	1.76	5.2	3.29	5.6		3.7	208	350.2	561.3
High	[R].GQLYGGLADCLVK.[T]	1xCarbamidomethyl [C10]; 1xTMTpro [K13]; 1xTMTpro [N-Term]	1.59696e-06	2.82963e-05	1	1	1	2	A2ADF7	A2ADF7 [259-271]	A2ADF7 1xCarbamidomethyl [C268]	Solute carrier family 25 member 34 OS=Mus musculus OX=10090 GN=Slc25a34 PE=1 SV=1	0	2002.13	1.357	0.831	1.749	0.878	0.811	1.401	0.645539	0.982556	0.583311	0.813187	0.780814	0.504839	0.996109	0.999952	0.999526	1	0.99991	0.994122	1678.7	1028.1	2162.4	1085.8	1002.4	1236.6	1732.8	2.37	4.56	0.72	3.86	0.34		5.76	543.8	1037.3	941.9
High	[K].AFVDSGAQMTIMSQACAER.[C]	1xCarbamidomethyl [C16]; 1xTMTpro [N-Term]	2.16937e-09	2.82963e-05	1	2	1	1	A2ADY9	A2ADY9 [249-267]	A2ADY9 1xCarbamidomethyl [C264]	Protein DDI1 homolog 2 OS=Mus musculus OX=10090 GN=Ddi2 PE=1 SV=1	0	2377.13	1.376	0.921	1.666	1.156	1.878	1.83	0.298866	0.963003	0.184753	0.732502	0.208917	0.242455	0.975053	0.999952	0.899486	1	0.922619	0.987658	319.1	213.7	386.4	268.1	435.6	232	424.4	1.52	3.37	5.58	1.99	3.81		0.98	104	196	185.1
High	[-].MLITVYCVR.[R]	1xCarbamidomethyl [C7]; 1xTMTpro [N-Term]	0.00119237	5.93436e-05	1	2	1	2	A2ADY9	A2ADY9 [1-9]	A2ADY9 1xCarbamidomethyl [C7]	Protein DDI1 homolog 2 OS=Mus musculus OX=10090 GN=Ddi2 PE=1 SV=1	0	1458.81	0.869	0.905	1.352	0.915	1.796	0.943	0.974355	0.917156	0.597964	0.924145	0.579329	0.688375	0.999984	0.999952	0.999526	1	0.99991	0.995093	961.6	1002.3	1496.8	1012.6	1988.5	1107	1043.6	7.78	1.01	2.78	5.99	10.49		3.83	299.8	617.4	895.5
High	[R].DTLYSCAAMPSSASR.[D]	1xCarbamidomethyl [C6]; 1xTMTpro [N-Term]	1.18847e-07	2.82963e-05	1	1	1	1	A2AF47	A2AF47 [1185-1199]	A2AF47 1xCarbamidomethyl [C1190]	Dedicator of cytokinesis protein 11 OS=Mus musculus OX=10090 GN=Dock11 PE=1 SV=1	0	1920.91	1.264	1.308	0.599	0.695	0.636	1.907	0.412593	0.596131	0.661425	0.728803	0.644881	0.183511	0.996109	0.999952	0.999996	1	0.99991	0.951593	167	172.7	79.1	91.8	84	132.1	251.9	11.25	10.54	6.37	12.27	4.85		0.55	50.8	109.9	142.2
High	[R].GGSGGSGMSCFHSEPR.[K]	1xCarbamidomethyl [C10]; 1xTMTpro [N-Term]	2.37252e-07	2.82963e-05	1	1	1	1	A2AFK4	A2AFK4 [81-96]	A2AFK4 1xCarbamidomethyl [C90]	Mitochondrial ribosome associated GTPase 2 OS=Mus musculus OX=10090 GN=Mtg2 PE=1 SV=1	0	1913.86	0.777	1.052	1.964	2.711	0.964	1.342	0.9261	0.893881	0.129793	0.0497747	0.812784	0.425456	0.999984	0.999952	0.833116	0.461113	0.99991	0.994122	109.1	147.7	275.6	380.4	135.3	140.3	188.4	1.31	4.93	17.17	6.32	7.58		1.75	35.6	66.9	126.5
High	[R].SNDVTQSCSSGR.[S]	1xCarbamidomethyl [C8]; 1xTMTpro [N-Term]	1.42616e-07	2.82963e-05	1	1	1	1	A2AFS3	A2AFS3 [797-808]	A2AFS3 1xCarbamidomethyl [C804]	Endosome/lysosome-associated apoptosis and autophagy regulator 1 OS=Mus musculus OX=10090 GN=Elapor1 PE=1 SV=1	0	1601.75	0.064	3.782	0.121	0.169	0.371	0.154	3.61711e-06	0.0419774	0.000291498	0.00175905	0.129292	0.0386969	0.000844517	0.739106	0.0499578	0.0493697	0.797532	0.652495	6.8	397.6	12.7	17.8	39.1	105.1	16.2	69.28	24.96	31.56	13.83	1.15			3.8	2.4	295.1
High	[R].SSCDRHLLAASQNR.[I]	1xCarbamidomethyl [C3]; 1xTMTpro [N-Term]	1.77454e-05	2.82963e-05	1	1	1	1	A2AGH6	A2AGH6 [1202-1215]	A2AGH6 1xCarbamidomethyl [C1204]	Mediator of RNA polymerase II transcription subunit 12 OS=Mus musculus OX=10090 GN=Med12 PE=1 SV=1	1	1918.98	1.698	1.785	0.998	1.951	1.36	1.014	0.145543	0.325347	0.740699	0.121251	0.353376	0.475282	0.855923	0.989785	0.999996	0.702019	0.989183	0.994122	103.9	109.3	61.1	119.5	83.2	61.2	62.1	16.17	5.42	6.17	25.98	7.87		20.47	38.4	56.3	93.3
High	[K].TQMSTCVAK.[W]	1xCarbamidomethyl [C6]; 1xTMTpro [K9]; 1xTMTpro [N-Term]	3.02288e-06	2.82963e-05	1	1	1	2	A2AGT5	A2AGT5 [1198-1206]	A2AGT5 1xCarbamidomethyl [C1203]	Cytoskeleton-associated protein 5 OS=Mus musculus OX=10090 GN=Ckap5 PE=1 SV=1	0	1633.89	1.024	0.923	0.361	0.791	0.752	0.379	0.893662	0.7093	0.307221	0.65001	0.530919	0.431649	0.999984	0.999952	0.976685	1	0.99991	0.994122	2354.5	2121.6	828.8	1818.4	1729.5	2298.4	870.3	8.32	13.64	4.49	20.73	19.65		10.72	731.2	1517.5	1708.4
High	[R].MCLVYPASK.[M]	1xCarbamidomethyl [C2]; 1xTMTpro [K9]; 1xTMTpro [N-Term]	2.3683e-05	2.82963e-05	1	1	1	1	A2AGT5	A2AGT5 [1316-1324]	A2AGT5 1xCarbamidomethyl [C1317]	Cytoskeleton-associated protein 5 OS=Mus musculus OX=10090 GN=Ckap5 PE=1 SV=1	0	1676.94	0.965	1.815	0.705	0.881	0.727	0.672	0.968684	0.766281	0.798777	0.720993	0.561619	0.886459	0.999984	0.999952	0.999996	1	0.99991	0.998045	1521.7	2860.3	1111.7	1389.4	1145.4	1576.2	1058.7	6.75	5.44	1.93	11.64	2.99		2.86	477.9	969.9	2441.5
High	[K].IIVACIETLRK.[A]	1xCarbamidomethyl [C5]; 1xTMTpro [K11]; 1xTMTpro [N-Term]	3.93947e-05	2.82963e-05	1	1	1	1	A2AGT5	A2AGT5 [140-150]	A2AGT5 1xCarbamidomethyl [C144]	Cytoskeleton-associated protein 5 OS=Mus musculus OX=10090 GN=Ckap5 PE=1 SV=1	1	1924.19	0.613	1.477	0.961	1.128	0.673	0.356	0.641051	0.77107	0.908934	0.903329	0.639609	0.415738	0.996109	0.999952	0.999996	1	0.99991	0.994122	797.6	1921.9	1250.9	1467.1	875.2	1301.2	462.7	17.39	0.83	2.86	16.07	13.86		9.26	232.2	548.4	1694.9
High	[K].ILDHLTMIDNKNESELEAHLCR.[M]	1xCarbamidomethyl [C21]; 1xTMTpro [K11]; 1xTMTpro [N-Term]	1.10153e-07	2.82963e-05	1	1	1	1	A2AGT5	A2AGT5 [1775-1796]	A2AGT5 1xCarbamidomethyl [C1795]	Cytoskeleton-associated protein 5 OS=Mus musculus OX=10090 GN=Ckap5 PE=1 SV=1	1	3259.71	0.742	1.759	0.992	1.112	0.866	0.41	0.966622	0.316612	0.591386	0.722818	0.859067	0.602328	0.999984	0.989785	0.999526	1	0.999916	0.995093	343.5	814.3	459	514.7	400.7	462.9	189.8	10.03	1.4	0.87	6.41	6.07		23.14	105.4	224.1	715.2
High	[K].NESELEAHLCR.[M]	1xCarbamidomethyl [C10]; 1xTMTpro [N-Term]	6.87212e-07	2.82963e-05	1	1	1	1	A2AGT5	A2AGT5 [1786-1796]	A2AGT5 1xCarbamidomethyl [C1795]	Cytoskeleton-associated protein 5 OS=Mus musculus OX=10090 GN=Ckap5 PE=1 SV=1	0	1661.82	0.557	0.86	0.655	1.769	0.408	0.631	0.684986	0.905127	0.914296	0.322013	0.314736	0.978883	0.998324	0.999952	0.999996	0.945993	0.98292	0.999948	275.3	425.3	323.8	874.8	201.6	494.4	311.8	10.78	7.47	10.01	31.37	17.5		12.77	97.9	155	357.8
High	[R].HCTSSTLPK.[S]	1xCarbamidomethyl [C2]; 1xTMTpro [K9]; 1xTMTpro [N-Term]	6.21331e-05	2.82963e-05	1	1	1	1	A2AGT5	A2AGT5 [426-434]	A2AGT5 1xCarbamidomethyl [C427]	Cytoskeleton-associated protein 5 OS=Mus musculus OX=10090 GN=Ckap5 PE=1 SV=1	0	1638.91	0.721	1.842	1.025	1.09	1.048	1.108	0.941436	0.293564	0.781392	0.741466	0.694149	0.538209	0.999984	0.982002	0.999996	1	0.99991	0.994417	98.5	251.7	140	149	143.2	136.6	151.4	9.89	1.92	0.73	11.73	5.75		19.28	34.8	55.8	226.3
High	[R].LACMEEFQK.[A]	1xCarbamidomethyl [C3]; 1xTMTpro [K9]; 1xTMTpro [N-Term]	8.48248e-05	2.82963e-05	1	1	1	2	A2AGT5	A2AGT5 [617-625]	A2AGT5 1xCarbamidomethyl [C619]	Cytoskeleton-associated protein 5 OS=Mus musculus OX=10090 GN=Ckap5 PE=1 SV=1	0	1763.93	0.419	1.656	0.522	0.933	0.589	0.399	0.319106	0.755242	0.507931	0.820154	0.353771	0.490376	0.983387	0.999952	0.999526	1	0.989183	0.994122	669	2647.5	834.5	1491.7	941.2	1598.4	638.4	0.59	1.58	5.19	3.94	6.44		5.75	221.3	404.8	2374.8
High	[R].TEMPCQALVK.[M]	1xCarbamidomethyl [C5]; 1xTMTpro [K10]; 1xTMTpro [N-Term]	3.5457e-06	2.82963e-05	1	1	1	2	A2AGT5	A2AGT5 [633-642]	A2AGT5 1xCarbamidomethyl [C637]	Cytoskeleton-associated protein 5 OS=Mus musculus OX=10090 GN=Ckap5 PE=1 SV=1	0	1784.99	0.721	1.156	0.598	0.672	0.548	0.411	0.590824	0.838717	0.603516	0.396766	0.31369	0.500918	0.996109	0.999952	0.999526	0.983142	0.982801	0.994122	1557.5	2497.9	1292.1	1451.8	1183.1	2160.9	887.6	18.14	0.82	2.89	9.93	5.17		8.98	583.7	831.9	2228.7
High	[R].ALYCYQPDTEEIYK.[L]	1xCarbamidomethyl [C4]; 1xTMTpro [K14]; 1xTMTpro [N-Term]	0.000159269	2.82963e-05	1	1	1	3	A2AHC3	A2AHC3 [1504-1517]	A2AHC3 1xCarbamidomethyl [C1507]	Calmodulin-regulated spectrin-associated protein 1 OS=Mus musculus OX=10090 GN=Camsap1 PE=1 SV=1	0	2401.22	0.506	2.445	0.732	0.586	0.732	0.859	0.485201	0.580806	0.93835	0.326245	0.697136	0.861525	0.996109	0.999952	0.999996	0.948728	0.99991	0.998045	665.3	3213.4	961.3	769.8	961.5	1314.1	1128.4	5.59	5.91	8.24	1.07	1.37		8.34	228	388.6	2733.7
High	[R].GQEELWEYCSRPR.[R]	1xCarbamidomethyl [C9]; 1xTMTpro [N-Term]	6.18387e-08	2.82963e-05	1	1	1	1	A2AI05	A2AI05 [338-350]	A2AI05 1xCarbamidomethyl [C346]	NADPH-dependent diflavin oxidoreductase 1 OS=Mus musculus OX=10090 GN=Ndor1 PE=2 SV=1	1	2013.98	1.023	1.647	1.049	1.531	0.994	0.679	0.540375	0.371537	0.516126	0.375974	0.743048	0.882908	0.996109	0.996752	0.999526	0.973563	0.99991	0.998045	431.9	695.4	443.1	646.7	419.7	422.3	286.6	12.72	10.01	9.25	14	15.54		7.92	130	287.2	574.6
High	[K].AQGIVTCLR.[A]	1xCarbamidomethyl [C7]; 1xTMTpro [N-Term]	5.33783e-05	2.82963e-05	1	1	1	1	A2AIL4	A2AIL4 [210-218]	A2AIL4 1xCarbamidomethyl [C216]	NADH dehydrogenase (ubiquinone) complex I, assembly factor 6 OS=Mus musculus OX=10090 GN=Ndufaf6 PE=1 SV=1	0	1321.76	0.965	0.953	1.139	2.096	1.057	0.31	0.73648	0.904343	0.558718	0.267904	0.823631	0.359205	0.999984	0.999952	0.999526	0.914638	0.99991	0.994122	882.2	870.7	1040.7	1915.4	966.3	914	282.9	15.52	3.21	9.39	22.72	19.78		6.92	260.3	598.5	755
High	[R].QVFLPMDVCVQHGVSQEDFLR.[R]	1xCarbamidomethyl [C9]; 1xTMTpro [N-Term]	2.58142e-08	2.82963e-05	1	1	1	1	A2AIL4	A2AIL4 [228-248]	A2AIL4 1xCarbamidomethyl [C236]	NADH dehydrogenase (ubiquinone) complex I, assembly factor 6 OS=Mus musculus OX=10090 GN=Ndufaf6 PE=1 SV=1	0	2808.41	0.997	1.276	0.958	1.406	1.062	0.518	0.603424	0.540114	0.624164	0.432111	0.615517	0.868496	0.996109	0.999952	0.999526	0.991746	0.99991	0.998045	464.6	594.5	446.4	655.1	495.1	466	241.6	16.53	11.35	7.66	21.72	5.18		31.65	136.1	317.5	486.6
High	[R].RQVFLPMDVCVQHGVSQEDFLR.[R]	1xCarbamidomethyl [C10]; 1xTMTpro [N-Term]	1.13645e-08	2.82963e-05	1	1	1	1	A2AIL4	A2AIL4 [227-248]	A2AIL4 1xCarbamidomethyl [C236]	NADH dehydrogenase (ubiquinone) complex I, assembly factor 6 OS=Mus musculus OX=10090 GN=Ndufaf6 PE=1 SV=1	1	2964.51	1.091	1.284	1.63	1.527	0.837	0.801	0.5389	0.564024	0.167043	0.347318	0.974526	0.871564	0.996109	0.999952	0.881302	0.960577	0.99999	0.998045	315.3	370.8	470.8	441.2	241.7	288.9	231.3	4.23	9.12	7.58	20.34	20.76		8.4	100.8	197.4	350.9
High	[R].SVAAASGPGIPGSHLYCLELLR.[K]	1xCarbamidomethyl [C17]; 1xTMTpro [N-Term]	1.18433e-12	2.82963e-05	1	1	1	1	A2AIL4	A2AIL4 [45-66]	A2AIL4 1xCarbamidomethyl [C61]	NADH dehydrogenase (ubiquinone) complex I, assembly factor 6 OS=Mus musculus OX=10090 GN=Ndufaf6 PE=1 SV=1	0	2572.39	1.351	0.914	1.369	1.285	1.038	1.693	0.306016	0.786848	0.348739	0.542789	0.663789	0.174919	0.977388	0.999952	0.98674	1	0.99991	0.94736	656.4	443.9	665.5	624.3	504.4	485.9	822.7	0.66	3.69	7.3	4.56	2.56		0.24	215.2	400.7	404.2
High	[R].SFSGTTCQPIQHMLR.[R]	1xCarbamidomethyl [C7]; 1xTMTpro [N-Term]	1.16264e-08	2.82963e-05	1	1	1	2	A2AIV2	A2AIV2 [1163-1177]	A2AIV2 1xCarbamidomethyl [C1169]	Protein virilizer homolog OS=Mus musculus OX=10090 GN=Virma PE=1 SV=1	0	2067.04	0.761	1.005	1.142	1.711	0.772	0.784	0.847865	0.787966	0.478671	0.338866	0.974483	0.773367	0.999984	0.999952	0.999091	0.954327	0.99999	0.997145	423.3	559.2	635.1	951.9	429.6	556.3	435.9	1.47	0.96	17.89	8.81	1.46		10.89	138	259.9	492.7
High	[R].FPCVVYINEVR.[V]	1xCarbamidomethyl [C3]; 1xTMTpro [N-Term]	1.64474e-05	2.82963e-05	1	1	1	1	A2AIV2	A2AIV2 [31-41]	A2AIV2 1xCarbamidomethyl [C33]	Protein virilizer homolog OS=Mus musculus OX=10090 GN=Virma PE=1 SV=1	0	1699.92	0.918	1.08	1.038	1.462	1.275	1.225	0.80973	0.747107	0.703669	0.482597	0.681692	0.490187	0.999984	0.999952	0.999996	1	0.99991	0.994122	811.3	954.2	916.9	1292.2	1126.4	883.6	1082.7	3.94	5.27	3.18	19.28	1.95		3.54	274.8	479.4	815.5
High	[R].TLDFGKFDEICEVGYQHGR.[T]	1xCarbamidomethyl [C11]; 1xTMTpro [K6]; 1xTMTpro [N-Term]	1.98036e-09	2.82963e-05	1	1	1	1	A2AJ88	A2AJ88 [1202-1220]	A2AJ88 1xCarbamidomethyl [C1212]	Patatin-like phospholipase domain-containing protein 7 OS=Mus musculus OX=10090 GN=Pnpla7 PE=1 SV=1	1	2879.46	0.925	0.64	0.951	1.354	1.046	0.886	0.66038	0.729552	0.622998	0.478419	0.723153	0.671191	0.996109	0.999952	0.999526	1	0.99991	0.995093	415.4	287.4	426.9	608	469.7	449	398.1	0.77	6.34	5.93	5.05	5.12		16.79	136.1	253.8	266.6
High	[K].SDCTYIVLSGR.[L]	1xCarbamidomethyl [C3]; 1xTMTpro [N-Term]	2.63655e-06	2.82963e-05	1	1	1	1	A2AJ88	A2AJ88 [632-642]	A2AJ88 1xCarbamidomethyl [C634]	Patatin-like phospholipase domain-containing protein 7 OS=Mus musculus OX=10090 GN=Pnpla7 PE=1 SV=1	0	1574.82	1.179	0.75	0.951	1.677	1.189	0.609	0.421384	0.782541	0.787586	0.328698	0.560645	0.925339	0.996109	0.999952	0.999996	0.950198	0.99991	0.998589	354.1	225.4	285.9	503.8	357.4	300.5	182.9	3.38	8.82	5.14	5.72	10.33		30.75	113.9	220.4	187.8
High	[R].GCAQVGILR.[A]	1xCarbamidomethyl [C2]; 1xTMTpro [N-Term]	3.1607e-05	2.82963e-05	1	1	1	1	A2AJ88	A2AJ88 [959-967]	A2AJ88 1xCarbamidomethyl [C960]	Patatin-like phospholipase domain-containing protein 7 OS=Mus musculus OX=10090 GN=Pnpla7 PE=1 SV=1	0	1277.73	0.755	0.865	0.91	2.159	1.354	0.3	0.898263	0.837028	0.688135	0.14761	0.555157	0.331634	0.999984	0.999952	0.999996	0.7566	0.99991	0.994122	397	455	478.7	1135.8	712.2	526.1	158	7.74	5.4	10.85	14.65	8.48		11.25	123.8	254.8	388.5
High	[R].SWCSGHLHLCCPR.[R]	3xCarbamidomethyl [C3; C10; C11]; 1xTMTpro [N-Term]	6.2259e-07	2.82963e-05	1	1	1	1	A2AJ88	A2AJ88 [895-907]	A2AJ88 3xCarbamidomethyl [C897; C904; C905]	Patatin-like phospholipase domain-containing protein 7 OS=Mus musculus OX=10090 GN=Pnpla7 PE=1 SV=1	0	1973.92	0.725	0.941	1.23	2.265	1.187	0.497	0.958239	0.908092	0.433884	0.099783	0.523847	0.719316	0.999984	0.999952	0.999091	0.646954	0.99991	0.995093	63.3	82.1	107.3	197.6	103.6	87.2	43.4	10.82	1.37	13.94	16.11	3.46		20.52	19.3	41.5	73.5
High	[R].TPTPSDLYCTDPR.[T]	1xCarbamidomethyl [C9]; 1xTMTpro [N-Term]	0.0245491	0.00172427	1	1	1	1	A2AJA9	A2AJA9 [238-250]	A2AJA9 1xCarbamidomethyl [C246]	Apical junction component 1 homolog OS=Mus musculus OX=10090 GN=Ajm1 PE=1 SV=1	0	1826.89	0.407	3.719	0.478	0.366	0.506	0.57	0.29299	0.0431493	0.323018	0.122679	0.330773	0.786688	0.973812	0.742322	0.982386	0.705089	0.986329	0.99723	83.2	761	97.7	74.9	103.5	204.7	116.7	17.71	5.43	12.28	6.7	1.99		4.96	31.1	44.6	649.6
High	[R].VYEQLCEFVEANR.[R]	1xCarbamidomethyl [C6]; 1xTMTpro [N-Term]	3.73934e-06	2.82963e-05	1	1	1	1	A2AJA9	A2AJA9 [918-930]	A2AJA9 1xCarbamidomethyl [C923]	Apical junction component 1 homolog OS=Mus musculus OX=10090 GN=Ajm1 PE=1 SV=1	0	1960.98	0.9	1.804	1.009	0.826	0.929	1.502	0.78383	0.302332	0.584288	0.943469	0.846055	0.266476	0.999984	0.9889	0.999526	1	0.99991	0.994122	355.2	711.9	398.2	326	366.6	394.5	592.7	7.75	4.94	4.94	3.48	5.56		11.64	123.6	204.3	609.8
High	[R].VYEQLCEFVEANRR.[F]	1xCarbamidomethyl [C6]; 1xTMTpro [N-Term]	1.3523e-07	2.82963e-05	1	1	1	1	A2AJA9	A2AJA9 [918-931]	A2AJA9 1xCarbamidomethyl [C923]	Apical junction component 1 homolog OS=Mus musculus OX=10090 GN=Ajm1 PE=1 SV=1	1	2117.08	0.318	2.778	0.384	0.265	0.695	0.273	0.188098	0.255663	0.336752	0.0822758	0.73308	0.332962	0.903072	0.970351	0.984191	0.593129	0.99991	0.994122	243.1	2119.9	292.9	202.6	530.5	763.1	208.4	1.54	6.4	11.25	6.88	11.73		12.51	79.2	149.3	1797.2
High	[K].SCHSCYTYYCSR.[L]	3xCarbamidomethyl [C2; C5; C10]; 1xTMTpro [N-Term]	3.02288e-06	2.82963e-05	1	1	1	1	A2AJA9	A2AJA9 [685-696]	A2AJA9 3xCarbamidomethyl [C686; C689; C694]	Apical junction component 1 homolog OS=Mus musculus OX=10090 GN=Ajm1 PE=1 SV=1	0	1947.81	1.354	4.361	0.315	0.172	0.397	0.408	0.365277	0.0232581	0.041376	0.00489122	0.118636	0.585166	0.993035	0.644694	0.58858	0.104575	0.778179	0.995093	159.8	514.7	37.2	20.3	46.9	118	48.1	42.15	11.51	26.8	11.82	2.61		37.78	38.7	132	420.8
High	[R].HPGLEEFAACQSHAFMK.[G]	1xCarbamidomethyl [C10]; 1xTMTpro [K17]; 1xTMTpro [N-Term]	7.15579e-10	2.82963e-05	1	1	1	1	A2AJB2	A2AJB2 [17-33]	A2AJB2 1xCarbamidomethyl [C26]	Transmembrane protein 141 OS=Mus musculus OX=10090 GN=Tmem141 PE=3 SV=1	0	2568.3	0.66	0.444	1.51	0.934	0.566	0.813	0.821096	0.444672	0.350406	0.842637	0.456902	0.894489	0.999984	0.999596	0.987068	1	0.99991	0.998093	618.2	416.4	1415.1	875.6	530.6	937.2	762	2.19	9.8	11.53	7.91	0.33		2.03	200.5	381.5	395.9
High	[R].SASASPLTPCSAPR.[S]	1xCarbamidomethyl [C10]; 1xTMTpro [N-Term]	2.93968e-09	2.82963e-05	1	1	1	2	A2AJI0	A2AJI0 [366-379]	A2AJI0 1xCarbamidomethyl [C375]	MAP7 domain-containing protein 1 OS=Mus musculus OX=10090 GN=Map7d1 PE=1 SV=1	0	1705.89	0.803	2.767	1.219	0.362	0.539	2.117	0.820461	0.124503	0.3847	0.15985	0.540456	0.148074	0.999984	0.883468	0.991884	0.783856	0.99991	0.92039	365.1	1257.6	553.7	164.3	244.7	454.4	961.9	3.76	10.82	0.02	4.83	2.99		25.82	123.5	216	1033.2
High	[R].GHGLTCEGQPVTSR.[L]	1xCarbamidomethyl [C6]; 1xTMTpro [N-Term]	1.78056e-09	2.82963e-05	1	1	1	2	A2AJL3	A2AJL3 [276-289]	A2AJL3 1xCarbamidomethyl [C281]	FGGY carbohydrate kinase domain-containing protein OS=Mus musculus OX=10090 GN=Fggy PE=1 SV=1	0	1802.91	0.642	0.428	0.47	1.602	2.482	0.73	0.671523	0.267212	0.296901	0.340899	0.105695	0.902081	0.996109	0.973941	0.970254	0.956059	0.753502	0.998093	186.3	124	136.5	464.6	720.1	290.1	211.7	30.28	1.32	10.49	1.99	1.41		0.38	76.3	91.1	109
High	[R].LAVICGTSSCHMGISK.[D]	2xCarbamidomethyl [C5; C10]; 1xTMTpro [K16]; 1xTMTpro [N-Term]	4.98159e-13	2.82963e-05	1	1	1	1	A2AJL3	A2AJL3 [290-305]	A2AJL3 2xCarbamidomethyl [C294; C299]	FGGY carbohydrate kinase domain-containing protein OS=Mus musculus OX=10090 GN=Fggy PE=1 SV=1	0	2329.23	0.719	0.437	0.582	1.051	2.407	1.156	0.968428	0.526832	0.75192	0.862492	0.208245	0.466867	0.999984	0.999952	0.999996	1	0.922349	0.994122	543.2	330.4	439.8	793.9	1818	755.4	873.2	0.06	13.56	8.5	5.27	19.78		14.03	179	329.9	322.7
High	[K].WEPQFNHHEQSSEDIWAACCLVTK.[E]	2xCarbamidomethyl [C19; C20]; 1xTMTpro [K24]; 1xTMTpro [N-Term]	1.47016e-07	2.82963e-05	1	1	1	1	A2AJL3	A2AJL3 [45-68]	A2AJL3 2xCarbamidomethyl [C63; C64]	FGGY carbohydrate kinase domain-containing protein OS=Mus musculus OX=10090 GN=Fggy PE=1 SV=1	0	3580.72	1.103	0.995	1.379	1.107	1.568	1.221	0.479672	0.97393	0.322795	0.635832	0.246788	0.364086	0.996109	0.999952	0.982386	1	0.951028	0.994122	80.4	72.5	100.5	80.7	114.3	72.9	89	14.73	4.98	8.72	19.85	6.67		24.14	29.4	44	62.1
High	[R].HVCISR.[L]	1xCarbamidomethyl [C3]; 1xTMTpro [N-Term]	0.0300765	0.0021142	1	1	1	1	A2AJN7	A2AJN7 [202-207]	A2AJN7 1xCarbamidomethyl [C204]	Solute carrier family 4 member 11 OS=Mus musculus OX=10090 GN=Slc4a11 PE=2 SV=1	0	1075.6	0.176	0.226	0.344	3.898	0.1	0.01	0.0119131	0.0139899	0.193725	0.0161155	1.08941e-05	1e-17	0.264352	0.575156	0.908826	0.236162	0.00227927	1.39481e-15	26.7	34.3	52.2	592.6	15.2	152	0	6.55	12.3	26.93	0.29	7.11			8.4	17	27.9
High	[K].SPYLHPCVR.[E]	1xCarbamidomethyl [C7]; 1xTMTpro [N-Term]	0.000144307	2.82963e-05	1	1	1	1	A2AJN7	A2AJN7 [568-576]	A2AJN7 1xCarbamidomethyl [C574]	Solute carrier family 4 member 11 OS=Mus musculus OX=10090 GN=Slc4a11 PE=2 SV=1	0	1432.77	0.381	0.841	0.499	3.252	0.394	0.421	0.251933	0.821495	0.327045	0.0520525	0.182844	0.527746	0.957338	0.999952	0.982386	0.472033	0.893764	0.994122	82.3	181.7	107.9	702.8	85.1	216.1	91	6.94	7.6	9.71	7.45	1.13		34.38	25.8	52.5	152.7
High	[K].SDLEAATGGCVLLHTSR.[K]	1xCarbamidomethyl [C10]; 1xTMTpro [N-Term]	1.29736e-12	2.82963e-05	1	1	1	1	A2AJN7	A2AJN7 [70-86]	A2AJN7 1xCarbamidomethyl [C79]	Solute carrier family 4 member 11 OS=Mus musculus OX=10090 GN=Slc4a11 PE=2 SV=1	0	2091.08	0.522	0.782	0.971	3.073	0.439	0.895	0.589673	0.714975	0.78202	0.0484264	0.295481	0.745699	0.996109	0.999952	0.999996	0.453912	0.979484	0.995093	84	126	156.4	495.1	70.7	161.1	144.2	2.12	9.39	18.4	0.87	6.57		13.25	28.1	50.3	104.6
High	[K].ANYLIVEDAICNELGTTR.[G]	1xCarbamidomethyl [C11]; 1xTMTpro [N-Term]	9.62332e-10	2.82963e-05	1	1	1	1	A2AJQ3	A2AJQ3 [637-654]	A2AJQ3 1xCarbamidomethyl [C647]	Probable C-mannosyltransferase DPY19L4 OS=Mus musculus OX=10090 GN=Dpy19l4 PE=2 SV=1	0	2356.21	0.857	0.89	1.001	2.042	0.815	1.697	0.821017	0.984648	0.690767	0.183563	0.95516	0.238402	0.999984	0.999952	0.999996	0.819167	0.99999	0.98645	259.3	269.5	303	618.1	246.9	302.7	513.9	9.71	2.26	10.98	4.48	9.46		7.1	91.5	147.1	235.3
High	[R].VTCSDLGISGTVR.[V]	1xCarbamidomethyl [C3]; 1xTMTpro [N-Term]	4.03026e-05	2.82963e-05	1	1	1	1	A2AJW4	A2AJW4 [162-174]	A2AJW4 1xCarbamidomethyl [C164]	Protein phosphatase 1 regulatory subunit OS=Mus musculus OX=10090 GN=Ppp1r3d PE=1 SV=1	0	1668.89	1.855	1.268	2.334	0.384	0.328	1.111	0.214087	0.535679	0.140436	0.182062	0.189232	0.491919	0.929887	0.999952	0.846241	0.81651	0.902866	0.994122	967.7	661.6	1217.8	200.3	171	521.7	579.6	12.67	4.92	2.86	12.19	1.24		16.05	291.4	643.3	566.8
High	[K].AAGAPGAACGAGCNR.[Q]	2xCarbamidomethyl [C9; C13]; 1xTMTpro [N-Term]	0.000119367	2.82963e-05	1	1	1	1	A2AJW4	A2AJW4 [65-79]	A2AJW4 2xCarbamidomethyl [C73; C77]	Protein phosphatase 1 regulatory subunit OS=Mus musculus OX=10090 GN=Ppp1r3d PE=1 SV=1	0	1664.79	1.848	1.253	4.293	0.417	0.219	0.534	0.0970666	0.573079	0.0100912	0.202	0.0191805	0.851328	0.757261	0.999952	0.312702	0.84447	0.360979	0.997925	206.4	140	479.5	46.5	24.4	111.7	59.6	24.68	15.13	11.86	5.86	4.87			57	149.6	111.5
High	[R].GVCEEAQLSVR.[E]	1xCarbamidomethyl [C3]; 1xTMTpro [N-Term]	6.87779e-08	2.82963e-05	1	1	1	2	A2AKG8	A2AKG8 [207-217]	A2AKG8 1xCarbamidomethyl [C209]	Focadhesin OS=Mus musculus OX=10090 GN=Focad PE=1 SV=1	0	1551.81	0.917	1.466	0.924	1.339	1.499	0.576	0.906761	0.642809	0.838181	0.701436	0.686234	0.92005	0.999984	0.999952	0.999996	1	0.99991	0.998589	1077.4	1722.3	1086.1	1573.3	1761.6	1175.2	676.8	11.13	13.37	15.64	21.23	2.63		9.79	328	708.4	1389.6
High	[K].ITGECSSLIHLLER.[S]	1xCarbamidomethyl [C5]; 1xTMTpro [N-Term]	2.7018e-08	2.82963e-05	1	1	1	2	A2AKG8	A2AKG8 [282-295]	A2AKG8 1xCarbamidomethyl [C286]	Focadhesin OS=Mus musculus OX=10090 GN=Focad PE=1 SV=1	0	1932.05	1.243	1.204	1.089	1.299	1.787	0.986	0.430084	0.657483	0.617864	0.546349	0.21478	0.662324	0.996109	0.999952	0.999526	1	0.926676	0.995093	329.2	318.8	288.4	343.9	473.1	264.8	261.1	6.55	0.5	11.55	14.28	1.6		0.32	113.6	191	283.8
High	[R].HGDDSHTISCR.[L]	1xCarbamidomethyl [C10]; 1xTMTpro [N-Term]	1.10062e-06	2.82963e-05	1	1	1	3	A2AKG8	A2AKG8 [393-403]	A2AKG8 1xCarbamidomethyl [C402]	Focadhesin OS=Mus musculus OX=10090 GN=Focad PE=1 SV=1	0	1588.75	1.123	1.078	1.264	1.256	1.264	0.293	0.497135	0.761457	0.354586	0.555628	0.476245	0.389792	0.996109	0.999952	0.989232	1	0.99991	0.994122	428.5	411.3	482.3	479.3	482.2	381.6	111.8	14.32	5.65	15.76	15.64	9.04		38.89	127.5	288.2	350.6
High	[K].GGFPCTLHFR.[V]	1xCarbamidomethyl [C5]; 1xTMTpro [N-Term]	0.00020614	2.82963e-05	1	1	1	1	A2ALK8	A2ALK8 [97-106]	A2ALK8 1xCarbamidomethyl [C101]	Tyrosine-protein phosphatase non-receptor type 3 OS=Mus musculus OX=10090 GN=Ptpn3 PE=1 SV=1	0	1495.78	0.494	2.522	0.506	1.762	1.636	0.258	0.468108	0.128485	0.440804	0.205782	0.310656	0.230906	0.996109	0.886628	0.999091	0.847774	0.98144	0.981395	63.6	325	65.2	227.1	210.9	128.9	33.2	4.28	8.11	2.7	23.25	10.04		10.36	21.6	37.5	272.2
High	[K].MDVCEGR.[L]	1xCarbamidomethyl [C4]; 1xTMTpro [N-Term]	0.00322992	0.000207355	1	1	1	1	A2ALK8	A2ALK8 [132-138]	A2ALK8 1xCarbamidomethyl [C135]	Tyrosine-protein phosphatase non-receptor type 3 OS=Mus musculus OX=10090 GN=Ptpn3 PE=1 SV=1	0	1170.56	0.323	1.165	0.596	1.052	1.423	0.441	0.156207	0.539619	0.710865	0.795412	0.408647	0.594722	0.870196	0.999952	0.999996	1	0.9994	0.995093	123.6	446.3	228.4	402.9	545.1	383.2	169.1	4.4	0.34	4.17	9.61	3.27		18.59	42	72.8	394.9
High	[R].VDGEPALVHCSAGIGR.[T]	1xCarbamidomethyl [C10]; 1xTMTpro [N-Term]	1.9473e-07	2.82963e-05	1	1	1	1	A2ALK8	A2ALK8 [833-848]	A2ALK8 1xCarbamidomethyl [C842]	Tyrosine-protein phosphatase non-receptor type 3 OS=Mus musculus OX=10090 GN=Ptpn3 PE=1 SV=1	0	1942.01	0.52	1.395	1.515	0.983	1.176	0.877	0.546309	0.451136	0.26535	0.770135	0.551489	0.698611	0.996109	0.999596	0.956346	1	0.99991	0.995093	175.9	471.7	512.1	332.2	397.6	338.1	296.5	4.94	4.55	9.61	5.2	4.34		4.66	60	103.2	405.2
High	[K].FVCEAILR.[V]	1xCarbamidomethyl [C3]; 1xTMTpro [N-Term]	0.000369565	2.82963e-05	1	1	1	2	A2ALK8	A2ALK8 [893-900]	A2ALK8 1xCarbamidomethyl [C895]	Tyrosine-protein phosphatase non-receptor type 3 OS=Mus musculus OX=10090 GN=Ptpn3 PE=1 SV=1	0	1311.74	0.297	1.554	0.8	0.873	1.442	0.425	0.125363	0.798481	0.961563	0.716027	0.820694	0.504162	0.820974	0.999952	0.999996	1	0.99991	0.994122	455.6	2388.1	1229	1342	2215.2	1536.5	652.8	18.17	1.05	1.96	1.06	1.55		9.27	170.8	243.3	2134.2
High	[K].LVCEDVNVDR.[F]	1xCarbamidomethyl [C3]; 1xTMTpro [N-Term]	2.57715e-06	2.82963e-05	1	1	1	1	A2ALS5	A2ALS5 [159-168]	A2ALS5 1xCarbamidomethyl [C161]	Rap1 GTPase-activating protein 1 OS=Mus musculus OX=10090 GN=Rap1gap PE=1 SV=2	0	1522.79	0.371	2.819	0.773	0.722	0.296	0.832	0.27003	0.536653	0.906751	0.523011	0.0756065	0.964897	0.965783	0.999952	0.999996	1	0.662726	0.999948	594.7	4514	1238.1	1156.7	473.7	1601.3	1332.5	9.48	18.48	2.69	14.81	4.33		4.43	209.5	337.9	3511.2
High	[R].GGLDVTHGQTGTESVYCNFR.[N]	1xCarbamidomethyl [C17]; 1xTMTpro [N-Term]	5.32972e-12	2.82963e-05	1	1	1	1	A2ALS5	A2ALS5 [241-260]	A2ALS5 1xCarbamidomethyl [C257]	Rap1 GTPase-activating protein 1 OS=Mus musculus OX=10090 GN=Rap1gap PE=1 SV=2	0	2502.2	0.154	4.918	0.276	0.975	0.299	0.25	0.00361636	0.0297716	0.0459396	0.854436	0.0758756	0.194982	0.130189	0.684195	0.610858	1	0.663062	0.960427	45.3	1447.3	81.3	286.9	88.1	294.3	73.6	5.96	13.05	10.15	16.37	5.22		16.19	14.3	28.7	1170.4
High	[R].AFPEHLAACGAEASAYGKCVQASTAPGGR.[L]	2xCarbamidomethyl [C9; C19]; 1xTMTpro [K18]; 1xTMTpro [N-Term]	4.66386e-16	2.82963e-05	1	1	1	3	A2AMZ4	A2AMZ4 [17-45]	A2AMZ4 2xCarbamidomethyl [C25; C35]	NADH dehydrogenase [ubiquinone] 1 alpha subcomplex assembly factor 8 OS=Mus musculus OX=10090 GN=Ndufaf8 PE=1 SV=1	1	3542.78	0.645	1.658	1.459	1.067	0.607	0.521	0.791882	0.636475	0.617285	0.950474	0.430345	0.739393	0.999984	0.999952	0.999526	1	0.99991	0.995093	841.2	2161.9	1902.9	1391.5	792.2	1304.3	679.4	6.48	0.55	6.81	2.45	10.54		0.35	290.1	488.2	1910.3
High	[K].TYMNQLAMNSPEMSECDILHTLR.[W]	1xCarbamidomethyl [C16]; 1xTMTpro [N-Term]	5.91806e-10	2.82963e-05	1	1	1	1	A2AN08	A2AN08 [1018-1040]	A2AN08 1xCarbamidomethyl [C1033]	E3 ubiquitin-protein ligase UBR4 OS=Mus musculus OX=10090 GN=Ubr4 PE=1 SV=1	0	3058.44	1.166	1.218	1.166	0.94	1.103	2.444	0.487674	0.554022	0.572878	0.916169	0.637169	0.0637043	0.996109	0.999952	0.999526	1	0.99991	0.770733	320.3	334.6	320.3	258.2	303	274.7	671.3	2.79	3.12	3.61	2.46	2.74		11.59	107.6	190.8	290.3
High	[R].RVAMCVLSSPHGR.[R]	1xCarbamidomethyl [C5]; 1xTMTpro [N-Term]	1.13358e-05	2.82963e-05	1	1	1	1	A2AN08	A2AN08 [1894-1906]	A2AN08 1xCarbamidomethyl [C1898]	E3 ubiquitin-protein ligase UBR4 OS=Mus musculus OX=10090 GN=Ubr4 PE=1 SV=1	1	1773.95	2.053	1.573	1.204	1.796	1.207	0.86	0.0874927	0.413296	0.510715	0.225792	0.616358	0.758894	0.722162	0.999596	0.999526	0.872829	0.99991	0.995903	298.1	228.4	174.9	260.8	175.3	145.2	125	6.46	8.35	4.99	13.72	3.72		2.7	93.8	189.6	191
High	[R].VAMCVLSSPHGR.[R]	1xCarbamidomethyl [C4]; 1xTMTpro [N-Term]	2.63655e-06	2.82963e-05	1	1	1	1	A2AN08	A2AN08 [1895-1906]	A2AN08 1xCarbamidomethyl [C1898]	E3 ubiquitin-protein ligase UBR4 OS=Mus musculus OX=10090 GN=Ubr4 PE=1 SV=1	0	1617.85	1.167	1.882	1.059	1.346	1.427	1.371	0.441416	0.234004	0.634148	0.379534	0.358468	0.338739	0.996109	0.962729	0.999526	0.974434	0.989621	0.994122	117.6	189.7	106.7	135.7	143.9	100.8	138.2	11.04	3.92	10.2	23.24	0.75		22.06	41.9	66.1	163.7
High	[R].HTACNEQQR.[T]	1xCarbamidomethyl [C4]; 1xTMTpro [N-Term]	1.82928e-05	2.82963e-05	1	1	1	2	A2AN08	A2AN08 [2217-2225]	A2AN08 1xCarbamidomethyl [C2220]	E3 ubiquitin-protein ligase UBR4 OS=Mus musculus OX=10090 GN=Ubr4 PE=1 SV=1	0	1447.7	0.806	0.885	0.339	1.203	1.481	0.344	0.868358	0.804402	0.194975	0.641732	0.406896	0.460151	0.999984	0.999952	0.908826	1	0.999199	0.994122	361.3	397	152.2	539.6	664.6	448.6	154.5	17.41	1.06	12.61	20.38	17.45		20.48	134.7	194	349.5
High	[K].AVQCLNTSSK.[E]	1xCarbamidomethyl [C4]; 1xTMTpro [K10]; 1xTMTpro [N-Term]	4.45697e-07	2.82963e-05	1	1	1	2	A2AN08	A2AN08 [2549-2558]	A2AN08 1xCarbamidomethyl [C2552]	E3 ubiquitin-protein ligase UBR4 OS=Mus musculus OX=10090 GN=Ubr4 PE=1 SV=1	0	1715.96	0.456	1.48	0.6	1.601	1.462	0.161	0.404494	0.664102	0.723373	0.419442	0.569748	0.0774422	0.996109	0.999952	0.999996	0.991102	0.99991	0.805728	444	1441.3	583.8	1558.1	1423.5	973.5	156.9	5.24	2.08	1.17	18.21	2.21		17.06	151.8	260	1259.8
High	[K].EGESSGSQEDQLCTALVNQLNR.[F]	1xCarbamidomethyl [C13]; 1xTMTpro [N-Term]	2.48469e-17	2.82963e-05	1	1	1	2	A2AN08	A2AN08 [3377-3398]	A2AN08 1xCarbamidomethyl [C3389]	E3 ubiquitin-protein ligase UBR4 OS=Mus musculus OX=10090 GN=Ubr4 PE=1 SV=1	0	2739.32	0.855	0.922	0.511	1.087	1.19	0.433	0.819884	0.838572	0.668888	0.857206	0.72202	0.644794	0.999984	0.999952	0.999996	1	0.99991	0.995093	644	694.4	385.1	818.8	896.4	753.2	326.5	6.51	6.13	1.04	14.32	19.16		11.81	202.6	409.8	589.8
High	[K].EKEGESSGSQEDQLCTALVNQLNR.[F]	1xCarbamidomethyl [C15]; 1xTMTpro [K2]; 1xTMTpro [N-Term]	6.48822e-11	2.82963e-05	1	1	1	1	A2AN08	A2AN08 [3375-3398]	A2AN08 1xCarbamidomethyl [C3389]	E3 ubiquitin-protein ligase UBR4 OS=Mus musculus OX=10090 GN=Ubr4 PE=1 SV=1	1	3300.66	0.918	0.83	0.454	0.988	1.11	0.42	0.892504	0.910804	0.511644	0.953684	0.971837	0.464349	0.999984	0.999952	0.999526	1	0.99999	0.994122	1247.4	1127.9	616.9	1343.4	1508.2	1359.2	571.5	4.3	1.09	0.79	8.25	11.38		1.21	398.6	781.4	1008.3
High	[R].WQAHCLTLHIYR.[N]	1xCarbamidomethyl [C5]; 1xTMTpro [N-Term]	0.000183968	2.82963e-05	1	1	1	1	A2AN08	A2AN08 [3423-3434]	A2AN08 1xCarbamidomethyl [C3427]	E3 ubiquitin-protein ligase UBR4 OS=Mus musculus OX=10090 GN=Ubr4 PE=1 SV=1	0	1902.01	1.071	0.838	0.66	0.95	1.786	2.569	0.481308	0.964568	0.762717	0.820918	0.21053	0.082061	0.996109	0.999952	0.999996	1	0.922762	0.819417	369.4	289.2	227.7	327.6	616.1	345	886.4	7.14	2.94	1.18	10.51	9.78		4.92	128	213.4	251.3
High	[R].ALSVLGCGHTSSTK.[C]	1xCarbamidomethyl [C7]; 1xTMTpro [K14]; 1xTMTpro [N-Term]	3.52471e-08	2.82963e-05	1	1	1	1	A2AN08	A2AN08 [3855-3868]	A2AN08 1xCarbamidomethyl [C3861]	E3 ubiquitin-protein ligase UBR4 OS=Mus musculus OX=10090 GN=Ubr4 PE=1 SV=1	0	2026.12	0.96	1.045	1.715	1.32	0.938	0.508	0.701893	0.746591	0.252228	0.655695	0.95493	0.734024	0.999058	0.999952	0.950946	1	0.99999	0.995093	865.4	942.1	1545.8	1189.3	844.9	901.2	457.6	32.56	3.33	5.4	9.88	1.43		12.9	225.5	664.8	816.3
High	[R].QLMCLLTR.[D]	1xCarbamidomethyl [C4]; 1xTMTpro [N-Term]	0.00062778	2.82963e-05	1	1	1	1	A2AN08	A2AN08 [3924-3931]	A2AN08 1xCarbamidomethyl [C3927]	E3 ubiquitin-protein ligase UBR4 OS=Mus musculus OX=10090 GN=Ubr4 PE=1 SV=1	0	1338.76	0.92	1.043	0.698	1.261	1.233	0.497	0.904848	0.944597	0.916073	0.701766	0.863443	0.699107	0.999984	0.999952	0.999996	1	0.999916	0.995093	1087.9	1233.6	826.1	1491.9	1459.1	1183.1	588.5	12.58	6.3	6.23	15.7	2.68		5.04	327.8	722.7	1046.6
High	[R].QAACTIVEALATVPSR.[K]	1xCarbamidomethyl [C4]; 1xTMTpro [N-Term]	2.84702e-07	2.82963e-05	1	1	1	1	A2AN08	A2AN08 [4140-4155]	A2AN08 1xCarbamidomethyl [C4143]	E3 ubiquitin-protein ligase UBR4 OS=Mus musculus OX=10090 GN=Ubr4 PE=1 SV=1	0	1991.09	1.799	0.82	0.981	1.041	1.053	1.054	0.502659	0.864679	0.899034	0.956783	0.947949	0.719411	0.996109	0.999952	0.999996	1	0.99999	0.995093	2333.2	1063.9	1271.6	1349.7	1365.6	1296.8	1366.2	20.56	2.38	3.37	3.89	3.88		2.47	663.9	1641.3	959.8
High	[R].QAACTIVEALATVPSRK.[Q]	1xCarbamidomethyl [C4]; 1xTMTpro [K17]; 1xTMTpro [N-Term]	1.21686e-08	2.82963e-05	1	1	1	1	A2AN08	A2AN08 [4140-4156]	A2AN08 1xCarbamidomethyl [C4143]	E3 ubiquitin-protein ligase UBR4 OS=Mus musculus OX=10090 GN=Ubr4 PE=1 SV=1	1	2423.39	1.166	0.937	0.98	0.932	1.06	1.305	0.791942	0.96851	0.88732	0.899344	0.999039	0.468945	0.999984	0.999952	0.999996	1	0.99999	0.994122	1562.8	1255.1	1313.4	1249.2	1420.8	1339.9	1749	5.4	2.37	3.75	0.24	5.4		7.08	495.5	986.6	1132.2
High	[K].AFMAVCIETAK.[R]	1xCarbamidomethyl [C6]; 1xTMTpro [K11]; 1xTMTpro [N-Term]	1.48137e-07	2.82963e-05	1	1	1	2	A2AN08	A2AN08 [4305-4315]	A2AN08 1xCarbamidomethyl [C4310]	E3 ubiquitin-protein ligase UBR4 OS=Mus musculus OX=10090 GN=Ubr4 PE=1 SV=1	0	1849.02	0.854	0.946	0.692	1.275	1.327	0.537	0.800738	0.926501	0.770878	0.901134	0.984652	0.717777	0.999984	0.999952	0.999996	1	0.99999	0.995093	1770.1	1961.5	1433.2	2642.5	2750.9	2072.5	1112.8	8.74	1.53	7.78	10.7	14.47		4.04	548.1	1144.2	1758.9
High	[K].AFMAVCIETAKR.[Y]	1xCarbamidomethyl [C6]; 1xTMTpro [K11]; 1xTMTpro [N-Term]	4.55971e-07	2.82963e-05	1	1	1	1	A2AN08	A2AN08 [4305-4316]	A2AN08 1xCarbamidomethyl [C4310]	E3 ubiquitin-protein ligase UBR4 OS=Mus musculus OX=10090 GN=Ubr4 PE=1 SV=1	1	2005.12	0.528	1.088	0.65	1.174	1.443	0.447	0.641967	0.928545	0.805041	0.894064	0.637771	0.605	0.996109	0.999952	0.999996	1	0.99991	0.995093	600.5	1237.7	738.6	1334.9	1640.6	1137.1	507.9	5.62	11.35	1.79	6.79	13.55		6.13	190.1	379.7	1189.8
High	[K].VWCATNEGEPMR.[I]	1xCarbamidomethyl [C3]; 1xTMTpro [N-Term]	1.27257e-07	2.82963e-05	1	1	1	1	A2AN08	A2AN08 [4425-4436]	A2AN08 1xCarbamidomethyl [C4427]	E3 ubiquitin-protein ligase UBR4 OS=Mus musculus OX=10090 GN=Ubr4 PE=1 SV=1	0	1753.83	0.627	1.418	0.613	1.515	1.256	0.558	0.925744	0.455134	0.864682	0.453692	0.5679	0.847753	0.999984	0.999596	0.999996	1	0.99991	0.997925	375	848.1	366.6	906.1	751	598	333.9	16.19	9.84	7.19	12.41	1.72		3.49	110.1	255.6	701.7
High	[R].FKPYCSFEK.[Y]	1xCarbamidomethyl [C5]; 2xTMTpro [K2; K9]; 1xTMTpro [N-Term]	0.0150425	0.000968446	1	1	1	1	A2AN08	A2AN08 [4635-4643]	A2AN08 1xCarbamidomethyl [C4639]	E3 ubiquitin-protein ligase UBR4 OS=Mus musculus OX=10090 GN=Ubr4 PE=1 SV=1	0	2118.19	0.627	0.628	0.351	0.773	1.591	0.317	0.675879	0.668207	0.175147	0.518608	0.888269	0.293987	0.996523	0.999952	0.888938	1	0.999916	0.994122	1207.4	1208.1	675.4	1488.5	3062.1	1924.7	610	5.63	1.52	14.34	2.45	20.25		6.45	413.9	705	1060.2
High	[K].QQGYSTVSHFNIVHYDCHLAAVR.[L]	1xCarbamidomethyl [C17]; 1xTMTpro [N-Term]	3.12387e-09	2.82963e-05	1	1	1	1	A2AN08	A2AN08 [4871-4893]	A2AN08 1xCarbamidomethyl [C4887]	E3 ubiquitin-protein ligase UBR4 OS=Mus musculus OX=10090 GN=Ubr4 PE=1 SV=1	0	3006.5	1.523	1.287	1.294	1.357	1.291	0.735	0.224184	0.689585	0.41211	0.420358	0.429593	0.830358	0.941133	0.999952	0.998276	0.991409	0.99991	0.997925	126.7	107.1	107.7	112.9	107.4	83.2	61.1	6.17	9.83	8.25	11.01	1.26		1.52	43.6	73.7	88.6
High	[R].HNTYLQECTGQR.[E]	1xCarbamidomethyl [C8]; 1xTMTpro [N-Term]	1.51426e-06	2.82963e-05	1	1	1	1	A2AN08	A2AN08 [4936-4947]	A2AN08 1xCarbamidomethyl [C4943]	E3 ubiquitin-protein ligase UBR4 OS=Mus musculus OX=10090 GN=Ubr4 PE=1 SV=1	0	1810.88	0.639	1.209	0.745	1.271	1.308	0.584	0.772945	0.626127	0.940644	0.489665	0.414242	0.955822	0.999984	0.999952	0.999996	1	0.99991	0.999948	73.2	138.5	85.4	145.5	149.8	114.6	66.9	6.78	3.41	7.71	5.19	17.93		4.35	25.3	42.4	119.9
High	[K].VPTSNTEGGWSCSLAEYIR.[H]	1xCarbamidomethyl [C12]; 1xTMTpro [N-Term]	1.66426e-10	2.82963e-05	1	1	1	2	A2AN08	A2AN08 [5107-5125]	A2AN08 1xCarbamidomethyl [C5118]	E3 ubiquitin-protein ligase UBR4 OS=Mus musculus OX=10090 GN=Ubr4 PE=1 SV=1	0	2431.19	0.909	1.088	1.131	1.51	1.287	1.583	0.839589	0.695778	0.558799	0.490472	0.707088	0.333513	0.999984	0.999952	0.999526	1	0.99991	0.994122	720.2	862	895.4	1195.6	1018.9	792	1254.1	19	6.59	10.95	14.87	3.18		7.19	271.6	382.3	729.8
High	[R].FYCVLSTEASEEDLNR.[L]	1xCarbamidomethyl [C3]; 1xTMTpro [N-Term]	1.94568e-06	2.82963e-05	1	1	1	1	A2AN08	A2AN08 [932-947]	A2AN08 1xCarbamidomethyl [C934]	E3 ubiquitin-protein ligase UBR4 OS=Mus musculus OX=10090 GN=Ubr4 PE=1 SV=1	0	2237.07	1.257	1.163	1.47	0.996	1.291	1.549	0.350732	0.727886	0.284485	0.762162	0.519221	0.345663	0.992244	0.999952	0.966056	1	0.99991	0.994122	212.3	196.4	248.2	168.2	217.9	168.9	261.5	4.54	0.16	11.77	8.23	2.89		17.63	72.2	124.9	174.4
High	[K].SPNPSLLHLCGSLAQLACVEPVR.[L]	2xCarbamidomethyl [C10; C18]; 1xTMTpro [N-Term]	2.42519e-06	2.82963e-05	1	1	1	1	A2AN08	A2AN08 [1440-1462]	A2AN08 2xCarbamidomethyl [C1449; C1457]	E3 ubiquitin-protein ligase UBR4 OS=Mus musculus OX=10090 GN=Ubr4 PE=1 SV=1	0	2822.5	1.814	1.223	1.108	1.099	0.991	1.537	0.333951	0.611478	0.573806	0.778596	0.952258	0.386059	0.986771	0.999952	0.999526	1	0.99999	0.994122	1647.1	1110.5	1006.4	997.6	899.6	908.1	1395.7	7.88	8.94	0.97	15.53	0.91		6.11	573.7	946.5	924.7
High	[K].MVDGVGVCTVCAK.[V]	2xCarbamidomethyl [C8; C11]; 1xTMTpro [K13]; 1xTMTpro [N-Term]	2.98224e-08	2.82963e-05	1	1	1	2	A2AN08	A2AN08 [1683-1695]	A2AN08 2xCarbamidomethyl [C1690; C1693]	E3 ubiquitin-protein ligase UBR4 OS=Mus musculus OX=10090 GN=Ubr4 PE=1 SV=1	0	2004.06	0.55	0.88	0.919	0.972	1.33	0.827	0.580145	0.885576	0.760524	0.943972	0.580614	0.772852	0.996109	0.999952	0.999996	1	0.99991	0.997069	364.6	583.6	609.5	644.7	882.1	663.1	548.1	6.09	2.69	18.56	6.97	4.28		3.52	125.4	212.2	507.9
High	[K].QMEELIEEPGLTCCICR.[E]	3xCarbamidomethyl [C13; C14; C16]; 1xTMTpro [N-Term]	2.96453e-10	2.82963e-05	1	1	1	2	A2AN08	A2AN08 [4823-4839]	A2AN08 3xCarbamidomethyl [C4835; C4836; C4838]	E3 ubiquitin-protein ligase UBR4 OS=Mus musculus OX=10090 GN=Ubr4 PE=1 SV=1	0	2442.15	0.938	0.929	0.988	1.232	1.048	1.113	0.632213	0.857302	0.638046	0.624672	0.751714	0.518577	0.996109	0.999952	0.999526	1	0.99991	0.994122	547.8	543	577.2	719.5	612.3	584.2	650.1	2.44	1.29	0.72	5.08	4.72		4.63	183.6	327.2	477.3
High	[K].QMEELIEEPGLTCCICREGYK.[F]	3xCarbamidomethyl [C13; C14; C16]; 1xTMTpro [K21]; 1xTMTpro [N-Term]	2.27054e-09	2.82963e-05	1	1	1	2	A2AN08	A2AN08 [4823-4843]	A2AN08 3xCarbamidomethyl [C4835; C4836; C4838]	E3 ubiquitin-protein ligase UBR4 OS=Mus musculus OX=10090 GN=Ubr4 PE=1 SV=1	1	3223.58	0.334	0.677	0.507	1.09	1.205	0.398	0.31016	0.894627	0.596638	0.735938	0.556578	0.604145	0.97918	0.999952	0.999526	1	0.99991	0.995093	176.2	357.4	267.6	575.4	635.8	527.7	209.9	7.95	2.22	9.49	14.81	0.53		3.1	61.4	101.2	312.1
High	[R].GKPNPPHLPHSGCEPTSSSGR.[L]	1xCarbamidomethyl [C13]; 1xTMTpro [K2]; 1xTMTpro [N-Term]	0.000148755	2.82963e-05	1	1	1	1	A2APT9	A2APT9 [151-171]	A2APT9 1xCarbamidomethyl [C163]	Kelch domain-containing protein 7A OS=Mus musculus OX=10090 GN=Klhdc7a PE=1 SV=3	1	2807.45	2.213	1.169	0.648	1.37	0.796	1.929	0.0501473	0.668659	0.695009	0.430875	0.949138	0.201802	0.567725	0.999952	0.999996	0.991746	0.99999	0.96484	255.1	134.8	74.7	157.9	91.8	115.3	222.4	18.09	3.07	14.48	30.53	11.64		8.5	73.9	176.3	122.2
High	[K].ADSRPVPCPAALADAPSPGPGPEPLVTGAASR.[D]	1xCarbamidomethyl [C8]; 1xTMTpro [N-Term]	1.49113e-15	2.82963e-05	1	1	1	2	A2APT9	A2APT9 [297-328]	A2APT9 1xCarbamidomethyl [C304]	Kelch domain-containing protein 7A OS=Mus musculus OX=10090 GN=Klhdc7a PE=1 SV=3	1	3385.75	3.525	0.968	1.179	0.679	0.717	1.151	0.00984999	0.959402	0.481203	0.526449	0.739881	0.537282	0.237906	0.999952	0.999091	1	0.99991	0.994269	659.2	181.1	220.5	126.9	134.1	187	215.1	15.87	10.96	17.6	43.67	3.68		10.86	194	448.3	173.6
High	[R].LVVADMCPQDDSGR.[L]	1xCarbamidomethyl [C7]; 1xTMTpro [N-Term]	3.11874e-07	2.82963e-05	1	1	1	1	A2APT9	A2APT9 [490-503]	A2APT9 1xCarbamidomethyl [C496]	Kelch domain-containing protein 7A OS=Mus musculus OX=10090 GN=Klhdc7a PE=1 SV=3	0	1866.9	3.63	0.881	1.049	1.605	0.733	1.364	0.0259292	0.987576	0.600505	0.334213	0.80767	0.372975	0.414404	0.999952	0.999526	0.95249	0.99991	0.994122	1150.4	279.2	332.4	508.5	232.2	316.9	432.3	18.1	0.57	18.85	8.74	3.35		8.55	333.2	795	248.7
High	[R].LVALEGHLYAIGGECLNTVER.[Y]	1xCarbamidomethyl [C15]; 1xTMTpro [N-Term]	1.62141e-06	2.82963e-05	1	1	1	1	A2APT9	A2APT9 [580-600]	A2APT9 1xCarbamidomethyl [C594]	Kelch domain-containing protein 7A OS=Mus musculus OX=10090 GN=Klhdc7a PE=1 SV=3	0	2618.39	1.124	1.442	0.809	0.951	0.835	1.387	0.543187	0.527079	0.861162	0.972665	0.963178	0.290076	0.996109	0.999952	0.999996	1	0.99999	0.994122	872.5	1119	627.5	737.8	648.1	776	1076.7	3.34	3.73	0.51	16.23	5.69		9.42	294.3	517.8	1019.2
High	[R].LWYECATYR.[L]	1xCarbamidomethyl [C5]; 1xTMTpro [N-Term]	1.37065e-05	2.82963e-05	1	1	1	1	A2APT9	A2APT9 [697-705]	A2APT9 1xCarbamidomethyl [C701]	Kelch domain-containing protein 7A OS=Mus musculus OX=10090 GN=Klhdc7a PE=1 SV=3	0	1565.77	2.767	0.69	0.506	1.717	1.045	1.178	0.067466	0.874902	0.585246	0.33099	0.866466	0.470276	0.652789	0.999952	0.999526	0.950302	0.999916	0.994122	1989.4	496.1	364.2	1234.6	751.3	719.1	847.4	11.12	8.9	16.19	24.61	0.53		2.2	605.7	1307.9	468.7
High	[R].MLCFLADHISPR.[F]	1xCarbamidomethyl [C3]; 1xTMTpro [N-Term]	3.04847e-07	2.82963e-05	1	1	1	1	A2APT9	A2APT9 [729-740]	A2APT9 1xCarbamidomethyl [C731]	Kelch domain-containing protein 7A OS=Mus musculus OX=10090 GN=Klhdc7a PE=1 SV=3	0	1763.93	2.197	1.056	1.068	1.242	0.989	1.196	0.0687006	0.896011	0.742144	0.576603	0.778151	0.517174	0.656835	0.999952	0.999996	1	0.99991	0.994122	311.5	149.7	151.4	176	140.2	141.8	169.6	9.11	3.14	9.78	13.27	4.2		0.17	96.2	201.9	135.8
High	[R].LPYPDAFQCAVVDDHIYCVGR.[R]	2xCarbamidomethyl [C9; C18]; 1xTMTpro [N-Term]	1.62276e-07	2.82963e-05	1	1	1	1	A2APT9	A2APT9 [706-726]	A2APT9 2xCarbamidomethyl [C714; C723]	Kelch domain-containing protein 7A OS=Mus musculus OX=10090 GN=Klhdc7a PE=1 SV=3	0	2799.36	2.838	0.7	0.663	1.469	1.038	1.386	0.0868149	0.907289	0.923249	0.400245	0.64845	0.330311	0.721619	0.999952	0.999996	0.985175	0.99991	0.994122	1416	349.1	330.7	733	518.1	498.9	691.3	10.87	1.17	17.47	21.23	1.17		14.42	431.9	929.3	312.2
High	[K].DDVHVCIMCLR.[A]	2xCarbamidomethyl [C6; C9]; 1xTMTpro [N-Term]	0.000118464	2.82963e-05	2	2	1	2	A2APV2; Q9JL26	A2APV2 [219-229]; Q9JL26 [224-234]	A2APV2 2xCarbamidomethyl [C224; C227]; Q9JL26 2xCarbamidomethyl [C229; C232]	Formin-like protein 2 OS=Mus musculus OX=10090 GN=Fmnl2 PE=1 SV=2 Formin-like protein 1 OS=Mus musculus OX=10090 GN=Fmnl1 PE=1 SV=1	0	1721.85	0.934	1.116	0.941	1.11	1.107	1.015	0.714947	0.822242	0.827945	0.702896	0.676088	0.636991	0.999058	0.999952	0.999996	1	0.99991	0.995093	169.8	203	171.1	201.8	201.3	181.9	184.7	1.9	5.03	13.8	11.44	1.03		21.58	55.2	104.6	173.8
High	[R].CSLQLAETER.[E]	1xCarbamidomethyl [C1]; 1xTMTpro [N-Term]	1.07488e-05	2.82963e-05	1	1	1	1	A2APY7	A2APY7 [199-208]	A2APY7 1xCarbamidomethyl [C199]	Arginine-hydroxylase NDUFAF5, mitochondrial OS=Mus musculus OX=10090 GN=Ndufaf5 PE=1 SV=1	0	1510.79	1.013	0.861	0.842	0.901	0.57	0.513	0.626809	0.958429	0.841851	0.895355	0.520261	0.762394	0.996109	0.999952	0.999996	1	0.99991	0.995978	807.4	686.3	671.2	717.8	454.6	797	409	18.66	6.11	12.03	6.74	3.17		1.62	303.7	429.6	635.7
High	[R].EIVHIQIGQCGNQIGAK.[F]	1xCarbamidomethyl [C10]; 1xTMTpro [K17]; 1xTMTpro [N-Term]	1.71842e-12	2.82963e-05	1	1	1	1	A2AQ07	A2AQ07 [3-19]	A2AQ07 1xCarbamidomethyl [C12]	Tubulin beta-1 chain OS=Mus musculus OX=10090 GN=Tubb1 PE=1 SV=1	0	2473.38	0.657	0.547	1.165	1.054	1.26	0.949	0.869456	0.675251	0.529696	0.853694	0.653775	0.634244	0.999984	0.999952	0.999526	1	0.99991	0.995093	494.9	412.1	877.2	793.9	948.6	753.1	714.3	2.56	0.39	14.15	8.23	5.71		10.83	166	295.3	366.6
High	[R].NIMAACDPR.[R]	1xCarbamidomethyl [C6]; 1xTMTpro [N-Term]	0.00225732	0.000117823	1	1	1	1	A2AQ07	A2AQ07 [298-306]	A2AQ07 1xCarbamidomethyl [C303]	Tubulin beta-1 chain OS=Mus musculus OX=10090 GN=Tubb1 PE=1 SV=1	0	1351.68	1.076	0.484	0.872	0.926	1.207	0.465	0.502088	0.567487	0.727324	0.993121	0.639774	0.73917	0.996109	0.999952	0.999996	1	0.99991	0.995093	651.1	293	528	560.4	730.2	605.2	281.3	3.92	11.37	16.91	1.38	15.29		17.82	220.5	384.8	281.7
High	[R].YLTVACIFR.[G]	1xCarbamidomethyl [C6]; 1xTMTpro [N-Term]	0.00722933	0.000474396	1	1	1	1	A2AQ07	A2AQ07 [310-318]	A2AQ07 1xCarbamidomethyl [C315]	Tubulin beta-1 chain OS=Mus musculus OX=10090 GN=Tubb1 PE=1 SV=1	0	1446.81	1.173	0.694	1.009	0.872	1.395	1.025	0.541379	0.858462	0.636594	0.811039	0.608761	0.594327	0.996109	0.999952	0.999526	1	0.99991	0.995093	1086.6	642.8	934.2	807.3	1292.1	926.1	949.3	11.64	2.55	2.97	0.9	1.43		1.01	329.6	717	580.6
High	[R].SASAYCSPSLQAEMHMEQSLYR.[Q]	1xCarbamidomethyl [C6]; 1xTMTpro [N-Term]	8.61517e-14	2.82963e-05	1	1	1	2	A2AQ25	A2AQ25 [431-452]	A2AQ25 1xCarbamidomethyl [C436]	Sickle tail protein OS=Mus musculus OX=10090 GN=Skt PE=1 SV=1	0	2850.32	0.286	3.207	0.832	0.533	0.557	0.637	0.121012	0.0537303	0.948694	0.310641	0.509487	0.931545	0.812291	0.758739	0.999996	0.943712	0.99991	0.999687	92.4	1036.3	268.7	172.2	179.9	323.1	205.7	10.3	0.19	6.69	18.99	4.86		9.46	28.3	60.4	920.5
High	[R].GHGTCVQALTGPWGR.[A]	1xCarbamidomethyl [C5]; 1xTMTpro [N-Term]	3.63346e-08	2.82963e-05	1	1	1	2	A2ARS0	A2ARS0 [165-179]	A2ARS0 1xCarbamidomethyl [C169]	Ankyrin repeat domain-containing protein 63 OS=Mus musculus OX=10090 GN=Ankrd63 PE=1 SV=1	0	1900.98	0.66	2.551	1.047	0.492	0.585	1.132	0.942184	0.106589	0.573733	0.302845	0.64198	0.447633	0.999984	0.86131	0.999526	0.938858	0.99991	0.994122	267.2	1032.5	423.9	199.2	237	404.8	458.2	2	43.38	7.64	6.95	5.97		0.83	86.8	164.7	667.1
High	[R].SIIDCRAEQGR.[T]	1xCarbamidomethyl [C5]; 1xTMTpro [N-Term]	0.000433283	2.82963e-05	1	1	1	1	A2ARS0	A2ARS0 [38-48]	A2ARS0 1xCarbamidomethyl [C42]	Ankyrin repeat domain-containing protein 63 OS=Mus musculus OX=10090 GN=Ankrd63 PE=1 SV=1	1	1608.84	0.799	2.964	0.577	0.299	0.401	0.286	0.909226	0.105479	0.585877	0.0475609	0.161752	0.224067	0.999984	0.859302	0.999526	0.450426	0.859957	0.975548	251.3	932.3	181.6	94.2	126.2	314.6	89.8	28.86	46.32	10.34	8.51	14.12		8.99	67.3	187.8	588.6
High	[R].TALSLACER.[G]	1xCarbamidomethyl [C7]; 1xTMTpro [N-Term]	2.40456e-05	2.82963e-05	1	1	1	1	A2ARS0	A2ARS0 [86-94]	A2ARS0 1xCarbamidomethyl [C92]	Ankyrin repeat domain-containing protein 63 OS=Mus musculus OX=10090 GN=Ankrd63 PE=1 SV=1	0	1324.72	0.077	2.529	0.159	0.074	0.113	0.111	0.0018916	0.244438	0.0321725	4.13248e-05	0.00554305	0.0363801	0.0852413	0.96712	0.52902	0.00279724	0.175339	0.638894	59.4	1938.6	122	56.5	86.4	766.6	85	16.5	46.97	16.25	12.35	17.69		17.8	22	32.1	1217.6
High	[K].IYWPCGLSIDYPNR.[L]	1xCarbamidomethyl [C5]; 1xTMTpro [N-Term]	1.33081e-06	2.82963e-05	1	1	1	1	A2ARV4	A2ARV4 [1598-1611]	A2ARV4 1xCarbamidomethyl [C1602]	Low-density lipoprotein receptor-related protein 2 OS=Mus musculus OX=10090 GN=Lrp2 PE=1 SV=1	0	2058.04	0.446	0.449	1.429	3.776	0.254	0.391	0.40933	0.496803	0.36175	0.0372392	0.108291	0.513158	0.996109	0.999596	0.989327	0.395207	0.7567	0.994122	360.7	363.3	1155.1	3052.5	205.4	808.5	315.9	19	1.13	26.76	1.55	5.41		21.22	103.8	250.9	319.7
High	[R].SCSPYNSFIVVSMLPAVR.[G]	1xCarbamidomethyl [C2]; 1xTMTpro [N-Term]	0.000119367	2.82963e-05	1	1	1	1	A2ARV4	A2ARV4 [2058-2075]	A2ARV4 1xCarbamidomethyl [C2059]	Low-density lipoprotein receptor-related protein 2 OS=Mus musculus OX=10090 GN=Lrp2 PE=1 SV=1	0	2331.22	1.257	0.779	1.448	1.088	1.018	1.109	0.382183	0.997612	0.295659	0.745103	0.714305	0.472856	0.996089	0.999952	0.969429	1	0.99991	0.994122	588.6	364.8	677.9	509.5	476.6	468.1	519	7.86	1.93	3.29	7.58	8.74		2.62	205	338.3	328
High	[R].AIVLDPCR.[G]	1xCarbamidomethyl [C7]; 1xTMTpro [N-Term]	0.00243262	0.000117823	1	1	1	1	A2ARV4	A2ARV4 [2512-2519]	A2ARV4 1xCarbamidomethyl [C2518]	Low-density lipoprotein receptor-related protein 2 OS=Mus musculus OX=10090 GN=Lrp2 PE=1 SV=1	0	1247.71	0.165	0.095	0.261	4.922	0.242	0.109	0.0243324	0.00322612	0.123206	0.0166417	0.0975443	0.0482658	0.401224	0.307531	0.823077	0.241638	0.731037	0.707129	123.3	71	195.5	3687.2	181	749.2	81.4	9.78	7.18	8	12.46	7.86		67.29	37.9	80.3	66.3
High	[R].HHTCYPR.[E]	1xCarbamidomethyl [C4]; 1xTMTpro [N-Term]	0.00400679	0.000263321	1	1	1	2	A2ARV4	A2ARV4 [262-268]	A2ARV4 1xCarbamidomethyl [C265]	Low-density lipoprotein receptor-related protein 2 OS=Mus musculus OX=10090 GN=Lrp2 PE=1 SV=1	0	1274.64	0.157	0.105	0.351	3.959	0.101	0.279	0.0112868	0.00133709	0.194921	0.0150771	0.00136686	0.329971	0.255739	0.19853	0.908826	0.227641	0.0747278	0.994122	81	54	181.2	2042	52.2	515.7	144.1	34.77	3.07	17.79	7.31	12.88		1.03	34.3	38.3	46.9
High	[K].YCVVDTGAR.[C]	1xCarbamidomethyl [C2]; 1xTMTpro [N-Term]	9.87336e-05	2.82963e-05	1	1	1	1	A2ARV4	A2ARV4 [2692-2700]	A2ARV4 1xCarbamidomethyl [C2693]	Low-density lipoprotein receptor-related protein 2 OS=Mus musculus OX=10090 GN=Lrp2 PE=1 SV=1	0	1344.69	0.119	0.178	0.285	3.278	0.126	0.261	0.0015808	0.0487553	0.142553	0.0550356	0.00776535	0.221995	0.0761335	0.752586	0.849992	0.485954	0.214764	0.975432	108.3	161.1	258.5	2972.1	114.1	906.7	236.9	13.69	2.26	21.04	1.58	0.5		3.71	39.3	59.7	140.6
High	[R].CISQDWK.[C]	1xCarbamidomethyl [C1]; 1xTMTpro [K7]; 1xTMTpro [N-Term]	0.0048937	0.000317316	1	1	1	1	A2ARV4	A2ARV4 [2713-2719]	A2ARV4 1xCarbamidomethyl [C2713]	Low-density lipoprotein receptor-related protein 2 OS=Mus musculus OX=10090 GN=Lrp2 PE=1 SV=1	0	1544.84	0.223	0.225	0.242	1.89	0.21	0.369	0.0676011	0.0966695	0.104108	0.482315	0.0174673	0.376047	0.65291	0.847325	0.783728	1	0.341302	0.994122	387.3	390.2	421.3	3283.4	364.2	1737.5	641.9	5.03	1.45	14.66	14.5	2.67		16.05	132.2	227.1	342.6
High	[R].STAFTCANGR.[C]	1xCarbamidomethyl [C6]; 1xTMTpro [N-Term]	2.11525e-06	2.82963e-05	1	1	1	1	A2ARV4	A2ARV4 [2744-2753]	A2ARV4 1xCarbamidomethyl [C2749]	Low-density lipoprotein receptor-related protein 2 OS=Mus musculus OX=10090 GN=Lrp2 PE=1 SV=1	0	1388.69	0.018	0.026	0.208	3.761	0.016	0.058	1.49548e-07	7.12456e-07	0.0379564	0.0346153	1.58508e-07	0.00378857	6.88348e-05	0.000783095	0.570144	0.380056	9.58356e-05	0.195622	14.7	21	168.6	3042.5	13.1	808.9	47	22.75	7.01		12.87	14.97		9.35	5.7	7.6	19.6
High	[R].CVPYHYR.[C]	1xCarbamidomethyl [C1]; 1xTMTpro [N-Term]	0.0101876	0.000632568	1	1	1	2	A2ARV4	A2ARV4 [2754-2760]	A2ARV4 1xCarbamidomethyl [C2754]	Low-density lipoprotein receptor-related protein 2 OS=Mus musculus OX=10090 GN=Lrp2 PE=1 SV=1	0	1298.66	0.409	0.476	0.627	2.736	0.385	0.203	0.324012	0.29629	0.714266	0.095729	0.211011	0.101247	0.985066	0.984208	0.999996	0.634387	0.922762	0.853066	148.8	173.2	228	995.4	139.9	363.8	73.7	29.07	0.32	23.27	3.42	8.33		14.71	39.8	111.4	153.3
High	[R].SNEFQCVSPHR.[C]	1xCarbamidomethyl [C6]; 1xTMTpro [N-Term]	1.61994e-05	2.82963e-05	1	1	1	2	A2ARV4	A2ARV4 [2867-2877]	A2ARV4 1xCarbamidomethyl [C2872]	Low-density lipoprotein receptor-related protein 2 OS=Mus musculus OX=10090 GN=Lrp2 PE=1 SV=1	0	1664.81	0.418	1.229	0.787	1.086	0.569	0.391	0.330146	0.797716	0.950336	0.951102	0.45918	0.581321	0.986771	0.999952	0.999996	1	0.99991	0.995093	449.2	1321.5	846.1	1167.5	611.2	1075.1	420.7	23.5	3.34	7.57	9.76	2.6		4.47	175	230.8	1200.3
High	[R].RNDCGDYSDER.[G]	1xCarbamidomethyl [C4]; 1xTMTpro [N-Term]	1.92918e-05	2.82963e-05	1	1	1	2	A2ARV4	A2ARV4 [3017-3027]	A2ARV4 1xCarbamidomethyl [C3020]	Low-density lipoprotein receptor-related protein 2 OS=Mus musculus OX=10090 GN=Lrp2 PE=1 SV=1	1	1690.74	0.077	0.099	0.252	2.712	0.059	0.104	0.00010457	0.000998626	0.0777154	0.082849	1.15033e-06	0.0301447	0.0110193	0.173923	0.719124	0.595448	0.000407293	0.58299	31.3	40.3	102.6	1104.2	24.2	407.2	42.2	16.61	11.98	18.04	12.63	15.44		19.95	11.6	16.9	32.8
High	[K].CAPGYIREPDGK.[S]	1xCarbamidomethyl [C1]; 1xTMTpro [K12]; 1xTMTpro [N-Term]	0.0834901	0.00561335	1	1	1	1	A2ARV4	A2ARV4 [3180-3191]	A2ARV4 1xCarbamidomethyl [C3180]	Low-density lipoprotein receptor-related protein 2 OS=Mus musculus OX=10090 GN=Lrp2 PE=1 SV=1	1	1971.06	0.144	0.122	0.249	1.765	0.114	0.085	0.0124782	0.0350586	0.10298	0.656148	0.00166276	0.0102952	0.27239	0.712176	0.782526	1	0.0864099	0.35139	284.1	240.6	491	3483.2	225.9	1973.6	168.5	22.05	11.8	43.07	24.93	1.88		8.01	109.5	147.5	196.3
High	[R].EPDGKSCR.[Q]	1xCarbamidomethyl [C7]; 1xTMTpro [K5]; 1xTMTpro [N-Term]	0.167023	0.00906165	1	1	1	1	A2ARV4	A2ARV4 [3187-3194]	A2ARV4 1xCarbamidomethyl [C3193]	Low-density lipoprotein receptor-related protein 2 OS=Mus musculus OX=10090 GN=Lrp2 PE=1 SV=1	1	1556.83	0.033	0.041	0.217	3.236	0.029	0.053	3.40167e-07	2.75578e-05	0.0766133	0.0876663	2.27646e-06	0.00204655	0.000130478	0.0133987	0.717336	0.610007	0.000660788	0.129041	25.1	31.2	164.4	2453.1	21.9	758	40	39.5	10.05	49.52	5.42	7.7		16.86	6.2	20.3	25.8
High	[R].LGQFQCR.[D]	1xCarbamidomethyl [C6]; 1xTMTpro [N-Term]	0.00567219	0.000371496	1	1	1	1	A2ARV4	A2ARV4 [3557-3563]	A2ARV4 1xCarbamidomethyl [C3562]	Low-density lipoprotein receptor-related protein 2 OS=Mus musculus OX=10090 GN=Lrp2 PE=1 SV=1	0	1212.65	0.15	0.145	0.308	3.609	0.284	0.116	0.0101981	0.0541623	0.21188	0.0499388	0.145849	0.0469666	0.24289	0.758739	0.922413	0.462232	0.833172	0.701884	119.6	115.5	245.1	2867.8	225.8	794.6	92	1.42	4.72	8.21	4.49	4.45		7.54	39	73.4	105.9
High	[R].QDCADGSDEDR.[V]	1xCarbamidomethyl [C3]; 1xTMTpro [N-Term]	4.31536e-05	2.82963e-05	1	1	1	1	A2ARV4	A2ARV4 [3578-3588]	A2ARV4 1xCarbamidomethyl [C3580]	Low-density lipoprotein receptor-related protein 2 OS=Mus musculus OX=10090 GN=Lrp2 PE=1 SV=1	0	1571.66	0.068	0.067	0.143	2.301	0.045	0.01	1.18113e-06	2.26616e-06	0.000500406	0.112404	1.30469e-07	1e-17	0.000345963	0.00192146	0.0701039	0.679739	8.40745e-05	1.39481e-15	7.9	7.8	16.6	268	5.2	116.5	0		36.03		18.09				0	4.8	5.3
High	[R].VLCEHHR.[C]	1xCarbamidomethyl [C3]; 1xTMTpro [N-Term]	0.00123812	5.93436e-05	1	1	1	2	A2ARV4	A2ARV4 [3589-3595]	A2ARV4 1xCarbamidomethyl [C3591]	Low-density lipoprotein receptor-related protein 2 OS=Mus musculus OX=10090 GN=Lrp2 PE=1 SV=1	0	1254.67	0.056	0.083	0.32	4.085	0.079	0.115	2.18901e-05	0.000781758	0.174648	0.0233685	0.00029363	0.0396889	0.00340724	0.152055	0.888547	0.29927	0.0245761	0.659503	26.8	39.6	152.6	1949.1	37.7	477.1	54.7	11.71	17.51	15.03	1.75	24.2		30.41	9.6	15	31
High	[K].ALACDGR.[A]	1xCarbamidomethyl [C4]; 1xTMTpro [N-Term]	0.00311187	0.000207355	1	1	1	1	A2ARV4	A2ARV4 [3816-3822]	A2ARV4 1xCarbamidomethyl [C3819]	Low-density lipoprotein receptor-related protein 2 OS=Mus musculus OX=10090 GN=Lrp2 PE=1 SV=1	0	1066.56	0.316	0.201	0.257	3.988	0.13	0.335	0.267858	0.0944207	0.113472	0.0495623	0.0136421	0.500068	0.965783	0.845065	0.804744	0.459788	0.295227	0.994122	228.5	145.5	185.8	2886.1	93.8	723.6	242.2	1.17	0.33	10.58	4.28	7.03		0.77	75.9	137.7	128.8
High	[R].CAADGSPPLLLLPENVR.[I]	1xCarbamidomethyl [C1]; 1xTMTpro [N-Term]	5.98876e-06	2.82963e-05	1	1	1	2	A2ARV4	A2ARV4 [4049-4065]	A2ARV4 1xCarbamidomethyl [C4049]	Low-density lipoprotein receptor-related protein 2 OS=Mus musculus OX=10090 GN=Lrp2 PE=1 SV=1	0	2126.16	0.648	0.494	0.632	1.639	0.398	7.038	0.857619	0.581784	0.752131	0.506311	0.189609	0.707038	0.999984	0.999952	0.999996	1	0.903327	0.995093	688.7	525.2	671.8	1742	422.9	1063.1	7481.9	30.87	3.08	9.94	14.57	14.83		6.02	283.2	335.2	476.1
High	[R].LQNVECLSFDWISR.[N]	1xCarbamidomethyl [C6]; 1xTMTpro [N-Term]	3.47727e-10	2.82963e-05	1	1	1	2	A2ARV4	A2ARV4 [782-795]	A2ARV4 1xCarbamidomethyl [C787]	Low-density lipoprotein receptor-related protein 2 OS=Mus musculus OX=10090 GN=Lrp2 PE=1 SV=1	0	2071.06	0.095	0.071	0.242	4.516	0.053	0.121	0.00398671	0.00380473	0.121612	0.0678829	8.53069e-05	0.0359542	0.139366	0.335969	0.82089	0.543781	0.0106949	0.635273	96.3	71.5	245.3	4581.4	53.3	1014.4	123.2	13.91	16.37	26.09	1.29	4.15		9.78	35	53	56.5
High	[R].CACDPEYTLESDGR.[T]	2xCarbamidomethyl [C1; C3]; 1xTMTpro [N-Term]	1.2046e-05	2.82963e-05	1	1	1	1	A2ARV4	A2ARV4 [1414-1427]	A2ARV4 2xCarbamidomethyl [C1414; C1416]	Low-density lipoprotein receptor-related protein 2 OS=Mus musculus OX=10090 GN=Lrp2 PE=1 SV=1	0	1976.86	0.045	0.079	0.336	2.231	0.057	0.114	7.44593e-05	0.00104068	0.309749	0.167915	6.22241e-05	0.0659973	0.00885269	0.17864	0.978182	0.797295	0.00853133	0.775788	29.4	51.4	219.1	1455.4	36.9	652.3	74.4	8.69	10.33	38.04	14.63	4.33		24.35	10.3	16.8	42.4
High	[R].CNQFQFTCLNGR.[C]	2xCarbamidomethyl [C1; C8]; 1xTMTpro [N-Term]	3.91701e-07	2.82963e-05	1	1	1	1	A2ARV4	A2ARV4 [2701-2712]	A2ARV4 2xCarbamidomethyl [C2701; C2708]	Low-density lipoprotein receptor-related protein 2 OS=Mus musculus OX=10090 GN=Lrp2 PE=1 SV=1	0	1848.88	0.121	0.167	0.224	2.81	0.096	0.283	0.0102908	0.0374693	0.0872777	0.100003	0.00289947	0.325865	0.243442	0.726298	0.745516	0.647267	0.120233	0.994122	70.9	97.6	131.2	1644.8	56.1	585.3	165.7	18.99	2.08	14.29	8.25	0.48		3.44	20.4	49.3	85.3
High	[R].GFTCECPDDFQTVQLR.[D]	2xCarbamidomethyl [C4; C6]; 1xTMTpro [N-Term]	9.75461e-08	2.82963e-05	1	1	1	4	A2ARV4	A2ARV4 [3490-3505]	A2ARV4 2xCarbamidomethyl [C3493; C3495]	Low-density lipoprotein receptor-related protein 2 OS=Mus musculus OX=10090 GN=Lrp2 PE=1 SV=1	0	2277.06	0.377	0.481	1.179	4.259	0.406	0.56	0.209892	0.482954	0.890911	0.094181	0.179007	0.779443	0.929322	0.999596	0.999996	0.629828	0.889384	0.997212	656.4	837.9	2051.5	7413.9	706.4	1740.7	975.3	11.65	5.46	19.73	6.7	2.7		5.23	199.1	433.2	715.1
High	[K].GSYECFCVDGFK.[S]	2xCarbamidomethyl [C5; C7]; 1xTMTpro [K12]; 1xTMTpro [N-Term]	4.0445e-09	2.82963e-05	1	1	1	4	A2ARV4	A2ARV4 [4028-4039]	A2ARV4 2xCarbamidomethyl [C4032; C4034]	Low-density lipoprotein receptor-related protein 2 OS=Mus musculus OX=10090 GN=Lrp2 PE=1 SV=1	0	2077	0.308	0.26	0.609	3.399	0.271	0.488	0.112598	0.145289	0.470706	0.169081	0.0360897	0.677646	0.797795	0.902369	0.999091	0.799385	0.490844	0.995093	888	749.9	1752.6	9787.2	779.6	2879.5	1405.7	10	4.32	29.79	10.77	2.24		5.94	314	502.7	645.2
High	[R].QPSSPNPCASATCSHLCLLSAQEPR.[H]	3xCarbamidomethyl [C8; C13; C17]; 1xTMTpro [N-Term]	7.15579e-10	2.82963e-05	1	1	1	2	A2ARV4	A2ARV4 [1698-1722]	A2ARV4 3xCarbamidomethyl [C1705; C1710; C1714]	Low-density lipoprotein receptor-related protein 2 OS=Mus musculus OX=10090 GN=Lrp2 PE=1 SV=1	0	3072.46	0.088	0.342	0.519	3.711	0.101	0.133	0.00227111	0.309716	0.566414	0.176168	0.000790082	0.0636946	0.0965372	0.989613	0.999526	0.808618	0.0507101	0.770733	120.5	468	711.1	5081.3	138.8	1369.2	182.2	14.2	13.98	25.77	2.01	3.52		4.7	43.9	66.2	458.4
High	[R].HYSCACPSGWNLSDDSVNCVR.[G]	3xCarbamidomethyl [C4; C6; C19]; 1xTMTpro [N-Term]	4.9775e-12	2.82963e-05	1	1	1	1	A2ARV4	A2ARV4 [1723-1743]	A2ARV4 3xCarbamidomethyl [C1726; C1728; C1741]	Low-density lipoprotein receptor-related protein 2 OS=Mus musculus OX=10090 GN=Lrp2 PE=1 SV=1	0	2788.22	0.38	0.467	1.206	3.282	0.2	0.736	0.202183	0.172511	0.472283	0.0124271	0.0137267	0.840728	0.921406	0.925951	0.999091	0.199583	0.296233	0.997925	30.1	36.9	95.4	259.6	15.9	79.1	58.2	1.34	17.11	1.34	2.57	12.39		23.14	10	18.1	29
High	[K].AYDADLQTGTNYCSQTTHPNGDCSHFCFPVPNFQR.[V]	3xCarbamidomethyl [C13; C23; C27]; 1xTMTpro [N-Term]	8.27367e-11	2.82963e-05	1	1	1	1	A2ARV4	A2ARV4 [961-995]	A2ARV4 3xCarbamidomethyl [C973; C983; C987]	Low-density lipoprotein receptor-related protein 2 OS=Mus musculus OX=10090 GN=Lrp2 PE=1 SV=1	0	4409.94	0.757	0.569	0.912	4.04	0.523	2.528	0.952838	0.316247	0.874414	0.00668904	0.414613	0.0940611	0.999984	0.989785	0.999996	0.128669	0.99991	0.845495	63.9	48	77.1	341.3	44.2	84.5	213.6	28.34	18.73	9.29	2.22	1.07		19.4	25.8	31.7	37.3
High	[R].YNIHETCVQR.[A]	1xCarbamidomethyl [C7]; 1xTMTpro [N-Term]	0.112789	0.00673146	1	1	1	1	A2AS37	A2AS37 [291-300]	A2AS37 1xCarbamidomethyl [C297]	Expressed sequence AI182371 OS=Mus musculus OX=10090 GN=AI182371 PE=1 SV=2	0	1623.82	0.569	0.942	3.381	2.096	2.968	1.13	0.633025	0.978997	0.0204343	0.131388	0.041267	0.524226	0.996109	0.999952	0.438718	0.727	0.514731	0.994122	105.5	174.6	626.7	388.5	550	185.3	209.5	14.39	7.21	26.15	22.24	17.96		3.37	38.5	57.9	147.2
High	[R].VADLGNVNVNLYNLQDSCLLIR.[E]	1xCarbamidomethyl [C18]; 1xTMTpro [N-Term]	2.10099e-07	2.82963e-05	1	1	1	1	A2AS89	A2AS89 [127-148]	A2AS89 1xCarbamidomethyl [C144]	Agmatinase, mitochondrial OS=Mus musculus OX=10090 GN=Agmat PE=1 SV=1	0	2807.5	1.684	1.136	0.955	0.957	1.428	1.741	0.190366	0.77556	0.747265	0.980379	0.433254	0.296027	0.90748	0.999952	0.999996	1	0.99991	0.994122	353	238.2	200.3	200.7	299.5	209.7	365.1	26.32	2.9	0.94	0.83	1.79		8.42	140.4	177.7	207
High	[R].VVLAEDCWMK.[S]	1xCarbamidomethyl [C7]; 1xTMTpro [K10]; 1xTMTpro [N-Term]	1.36149e-06	2.82963e-05	1	1	1	2	A2AS89	A2AS89 [250-259]	A2AS89 1xCarbamidomethyl [C256]	Agmatinase, mitochondrial OS=Mus musculus OX=10090 GN=Agmat PE=1 SV=1	0	1859.01	0.226	0.221	0.228	0.165	4.255	0.261	0.104407	0.100518	0.0860942	0.00179122	0.240672	0.244222	0.777548	0.854765	0.741526	0.0498113	0.94853	0.989121	320.2	312	322.7	233.4	6020.5	1414.8	369.4	44.58	2.35	12.73	7.91	2.7		3.93	76.1	269.6	281.4
High	[R].EAHPQLEDCLGFGAAFEK.[W]	1xCarbamidomethyl [C9]; 1xTMTpro [K18]; 1xTMTpro [N-Term]	8.35047e-13	2.82963e-05	1	1	1	1	A2ASA8	A2ASA8 [201-218]	A2ASA8 1xCarbamidomethyl [C209]	Inositol 1,4,5-trisphosphate receptor-interacting protein-like 1 OS=Mus musculus OX=10090 GN=Itpripl1 PE=2 SV=2	0	2627.34	0.875	0.779	0.974	1.769	0.884	1.613	0.737918	0.968727	0.60145	0.275359	0.883594	0.305044	0.999984	0.999952	0.999526	0.920434	0.999916	0.994122	379.8	338.2	422.9	767.8	383.9	434	699.9	1.46	2.97	8.39	6.91	4.37		5.1	126.4	228.4	293.8
High	[R].AQCNQQR.[R]	1xCarbamidomethyl [C3]; 1xTMTpro [N-Term]	0.0026807	0.000117823	1	1	1	1	A2ASQ1	A2ASQ1 [121-127]	A2ASQ1 1xCarbamidomethyl [C123]	Agrin OS=Mus musculus OX=10090 GN=Agrn PE=1 SV=1	0	1208.61	0.417	2.581	0.642	1.229	0.308	1.418	0.359523	0.134077	0.702812	0.543926	0.0776939	0.342085	0.992786	0.891901	0.999996	1	0.668918	0.994122	126.1	780.4	194.1	371.5	93.1	302.4	428.8	21.41	9.49	2.07	30.34	24.18		5.58	48.4	65.8	740.4
High	[K].AYGTGFVGCLR.[D]	1xCarbamidomethyl [C9]; 1xTMTpro [N-Term]	1.80335e-06	2.82963e-05	1	1	1	1	A2ASQ1	A2ASQ1 [1913-1923]	A2ASQ1 1xCarbamidomethyl [C1921]	Agrin OS=Mus musculus OX=10090 GN=Agrn PE=1 SV=1	0	1504.79	1.222	1.885	1.236	0.921	0.98	1.148	0.413097	0.324944	0.418081	0.966417	0.816754	0.455191	0.996109	0.989785	0.999091	1	0.99991	0.994122	737.4	1137.2	745.8	555.8	590.9	603.2	692.7	7.03	7.37	5.91	4.57	10.43		11.86	255.3	426.3	957.5
High	[R].HACANQEHIFK.[K]	1xCarbamidomethyl [C3]; 1xTMTpro [K11]; 1xTMTpro [N-Term]	1.95871e-05	2.82963e-05	1	1	1	1	A2ASQ1	A2ASQ1 [196-206]	A2ASQ1 1xCarbamidomethyl [C198]	Agrin OS=Mus musculus OX=10090 GN=Agrn PE=1 SV=1	0	1963.05	0.977	1.235	0.594	0.821	0.46	3.048	0.576592	0.573492	0.629501	0.998525	0.347961	0.0553761	0.996109	0.999952	0.999526	1	0.988786	0.739726	353.7	447.2	215.2	297.3	166.5	362.1	1103.7	35.67	15.65	2.93	22.71	15.65		17.01	150.8	166.1	443.3
High	[K].GFSCSCTAGR.[A]	2xCarbamidomethyl [C4; C6]; 1xTMTpro [N-Term]	0.147704	0.00848186	1	1	1	1	A2ASQ1	A2ASQ1 [1234-1243]	A2ASQ1 2xCarbamidomethyl [C1237; C1239]	Agrin OS=Mus musculus OX=10090 GN=Agrn PE=1 SV=1	0	1406.65	0.528	2.106	1.041	1.115	0.672	0.637	0.500146	0.230192	0.683478	0.596515	0.756127	0.960602	0.996109	0.960592	0.999996	1	0.99991	0.999948	30.8	123.1	60.9	65.2	39.3	58.5	37.3	41.99	1.85	7.24	15.58	10.3		0.77	13.8	13.8	107.8
High	[K].LVEGGSVVFECQIGGNPK.[P]	1xCarbamidomethyl [C11]; 1xTMTpro [K18]; 1xTMTpro [N-Term]	2.81101e-10	2.82963e-05	1	1	1	1	A2ASS6	A2ASS6 [1095-1112]	A2ASS6 1xCarbamidomethyl [C1105]	Titin OS=Mus musculus OX=10090 GN=Ttn PE=1 SV=1	0	2498.36	1.373	0.36	2.58	0.322	0.331	0.495	0.325208	0.15021	0.0545567	0.105666	0.155924	0.802555	0.985403	0.907516	0.649401	0.664306	0.849344	0.997925	580.8	152.1	1091.1	136.3	139.9	422.9	209.5	37.28	3.31	11.82	3.58	0.06		3.37	250.6	269.4	138.1
High	[K].VSYNKQTGECR.[L]	1xCarbamidomethyl [C10]; 1xTMTpro [K5]; 1xTMTpro [N-Term]	0.0362871	0.00246699	1	1	1	1	A2ASS6	A2ASS6 [1132-1142]	A2ASS6 1xCarbamidomethyl [C1141]	Titin OS=Mus musculus OX=10090 GN=Ttn PE=1 SV=1	1	1950.04	1.12	0.879	5.09	0.281	0.297	0.713	0.447457	0.927256	0.00603282	0.0297601	0.0517616	0.949662	0.996109	0.999952	0.249843	0.346163	0.567055	0.999948	379	297.4	1721.9	95.2	100.5	338.3	241.4	35.05	6.31	0.18	20.88	11.65		17.04	160.8	178.8	252.3
High	[R].KLHIIDVQLSDAGEYTCVLR.[L]	1xCarbamidomethyl [C17]; 1xTMTpro [K1]; 1xTMTpro [N-Term]	1.04878e-12	2.82963e-05	1	1	1	1	A2ASS6	A2ASS6 [12963-12982]	A2ASS6 1xCarbamidomethyl [C12979]	Titin OS=Mus musculus OX=10090 GN=Ttn PE=1 SV=1	1	2938.63	0.833	0.99	3.394	0.584	0.76	0.819	0.815455	0.896339	0.0237486	0.421531	0.854982	0.838331	0.999984	0.999952	0.467999	0.991409	0.99991	0.997925	241.2	286.7	982.9	169	220.2	289.6	237.1	8.01	1.23	2.24	10.15	6.35		8.12	84.1	138.5	252.1
High	[K].LHIIDVQLSDAGEYTCVLR.[L]	1xCarbamidomethyl [C16]; 1xTMTpro [N-Term]	4.92768e-09	2.82963e-05	1	1	1	2	A2ASS6	A2ASS6 [12964-12982]	A2ASS6 1xCarbamidomethyl [C12979]	Titin OS=Mus musculus OX=10090 GN=Ttn PE=1 SV=1	0	2506.33	0.706	0.763	3.432	0.514	0.556	1.023	0.970576	0.942717	0.0146408	0.397971	0.574725	0.535309	0.999984	0.999952	0.372317	0.98408	0.99991	0.994122	297.9	322	1448.8	217	234.6	422.1	431.6	18.84	9.21	5.53	12.59	6.28		4.93	112.2	158.3	304.9
High	[K].GQPLYLSCELNK.[E]	1xCarbamidomethyl [C8]; 1xTMTpro [K12]; 1xTMTpro [N-Term]	4.56346e-08	2.82963e-05	1	1	1	4	A2ASS6	A2ASS6 [13016-13027]	A2ASS6 1xCarbamidomethyl [C13023]	Titin OS=Mus musculus OX=10090 GN=Ttn PE=1 SV=1	0	2030.12	0.417	0.257	3.491	0.064	0.075	0.181	0.259694	0.125811	0.448599	2.00537e-05	0.000462395	0.219726	0.96239	0.883666	0.999091	0.00159933	0.0337831	0.973675	1596.8	985.9	13368.4	246.5	288	3829.8	694.7	47.34	10.1	11.64	44.35	2.92		5.6	745.1	685	939.4
High	[K].GQPLYLSCELNKER.[D]	1xCarbamidomethyl [C8]; 1xTMTpro [K12]; 1xTMTpro [N-Term]	9.47821e-10	2.82963e-05	1	1	1	2	A2ASS6	A2ASS6 [13016-13029]	A2ASS6 1xCarbamidomethyl [C13023]	Titin OS=Mus musculus OX=10090 GN=Ttn PE=1 SV=1	1	2315.27	0.285	0.338	6.931	0.077	0.05	0.162	0.185548	0.256292	0.0904646	7.82867e-05	8.9817e-05	0.114281	0.899829	0.970683	0.75331	0.00456956	0.0110878	0.880902	321.4	380.4	7808.1	86.7	56.5	1126.5	182	46.6	3.33	4.76	32.34	2.77		15.67	149.1	138.7	345.5
High	[K].GTAVFTCDIAK.[D]	1xCarbamidomethyl [C7]; 1xTMTpro [K11]; 1xTMTpro [N-Term]	0.00475108	0.000288586	1	1	1	1	A2ASS6	A2ASS6 [13110-13120]	A2ASS6 1xCarbamidomethyl [C13116]	Titin OS=Mus musculus OX=10090 GN=Ttn PE=1 SV=1	0	1791	0.54	0.756	3.697	0.43	0.362	0.498	0.603319	0.984899	0.0548514	0.317633	0.210774	0.870979	0.996109	0.999952	0.650912	0.944308	0.922762	0.998045	258.9	362.7	1773.7	206.5	173.7	479.7	238.7	2.82	7.07	1.45	14.72	5.58		5.31	87	154.2	338.2
High	[K].GTAVFTCDIAKDTPNIK.[W]	1xCarbamidomethyl [C7]; 2xTMTpro [K11; K17]; 1xTMTpro [N-Term]	1.08492e-07	2.82963e-05	1	1	1	1	A2ASS6	A2ASS6 [13110-13126]	A2ASS6 1xCarbamidomethyl [C13116]	Titin OS=Mus musculus OX=10090 GN=Ttn PE=1 SV=1	1	2763.55	0.668	0.379	3.629	0.212	0.311	0.654	0.726333	0.322757	0.367258	0.00599203	0.0916771	0.879472	0.999984	0.989785	0.989327	0.119915	0.714282	0.998045	993.9	564	5402.4	315.2	462.7	1488.7	973.9	11.93	4.06	15.77	5.87	5.28		4.51	356.3	555	514.9
High	[R].ILEGMGVTFHCK.[M]	1xCarbamidomethyl [C11]; 1xTMTpro [K12]; 1xTMTpro [N-Term]	3.1717e-09	2.82963e-05	1	1	1	2	A2ASS6	A2ASS6 [1304-1315]	A2ASS6 1xCarbamidomethyl [C1314]	Titin OS=Mus musculus OX=10090 GN=Ttn PE=1 SV=1	0	2000.1	0.968	0.439	3.471	0.253	0.341	0.416	0.984903	0.431698	0.441039	0.0155404	0.0786725	0.463452	0.999984	0.999596	0.999091	0.231169	0.672433	0.994122	1992.5	902.7	7142.7	519.7	700.7	2057.7	855.5	35.08	11.44	8.95	3.02	0.99		4.04	845.6	939.8	738.4
High	[K].GELLRPSPTCEIK.[A]	1xCarbamidomethyl [C10]; 1xTMTpro [K13]; 1xTMTpro [N-Term]	0.109833	0.00664664	1	1	1	2	A2ASS6	A2ASS6 [13222-13234]	A2ASS6 1xCarbamidomethyl [C13231]	Titin OS=Mus musculus OX=10090 GN=Ttn PE=1 SV=1	0	2108.2	0.797	0.267	2.971	0.049	0.049	0.221	0.667032	0.151885	0.568141	2.05853e-07	1.70659e-05	0.156349	0.996109	0.909037	0.999526	4.39243e-05	0.00327299	0.931363	1680.2	563.4	6265.7	103.3	103.4	2108.8	466.9	49.36	14.18	11.22	61.42	2.82		9.61	796.8	709.2	552.7
High	[R].FECVLTR.[E]	1xCarbamidomethyl [C3]; 1xTMTpro [N-Term]	0.00554812	0.000371496	1	1	1	1	A2ASS6	A2ASS6 [13294-13300]	A2ASS6 1xCarbamidomethyl [C13296]	Titin OS=Mus musculus OX=10090 GN=Ttn PE=1 SV=1	0	1228.67	1.326	0.116	3.938	0.045	0.061	0.13	0.50928	0.0154856	0.160777	4.69682e-05	0.00049655	0.0387732	0.996109	0.586325	0.875781	0.00307585	0.0353176	0.652703	1096.4	95.7	3257.2	37.1	50.5	827.1	107.4	63.15	11.75	12.3		2.69		33.84	583.9	412.1	92.3
High	[K].EGQTATFVCELSHEK.[M]	1xCarbamidomethyl [C9]; 1xTMTpro [K15]; 1xTMTpro [N-Term]	2.34251e-10	2.82963e-05	1	1	1	2	A2ASS6	A2ASS6 [13376-13390]	A2ASS6 1xCarbamidomethyl [C13384]	Titin OS=Mus musculus OX=10090 GN=Ttn PE=1 SV=1	0	2344.21	1.648	0.254	2.737	0.097	0.131	0.269	0.398594	0.175956	0.347245	0.000589467	0.0116446	0.306822	0.996109	0.928887	0.98674	0.0216071	0.268394	0.994122	1737	268.2	2884.8	102.6	138.2	1054.2	283.4	57.4	6.19	19.28	32.38	11.5		29.07	880.2	686.1	248.6
High	[K].GEPLTASPDCEIIEDGKK.[H]	1xCarbamidomethyl [C10]; 2xTMTpro [K17; K18]; 1xTMTpro [N-Term]	5.90834e-08	2.82963e-05	1	1	1	2	A2ASS6	A2ASS6 [13576-13593]	A2ASS6 1xCarbamidomethyl [C13585]	Titin OS=Mus musculus OX=10090 GN=Ttn PE=1 SV=1	1	2871.56	2.641	0.382	1.293	0.295	0.624	0.655	0.385475	0.300263	0.658991	0.0486262	0.498062	0.966747	0.996089	0.98618	0.999996	0.454786	0.99991	0.999948	3371.4	487.2	1650.3	376.9	796.6	1276.6	836.2	54.5	1.53	22.28	4.79	2.55		8.35	1667.4	1364.5	427.5
High	[K].DEAKFECEVSR.[E]	1xCarbamidomethyl [C7]; 1xTMTpro [K4]; 1xTMTpro [N-Term]	0.00526888	0.000371496	1	1	1	1	A2ASS6	A2ASS6 [13644-13654]	A2ASS6 1xCarbamidomethyl [C13650]	Titin OS=Mus musculus OX=10090 GN=Ttn PE=1 SV=1	1	1978.02	1.486	0.167	1.278	0.105	0.094	0.219	0.706248	0.0337491	0.783009	0.000189975	0.000402432	0.160313	0.999058	0.705044	0.999996	0.00923225	0.0313197	0.935867	2237.9	251.6	1923.7	158.4	142.3	1505.7	329.2	67.53	6.43	35.01	17.39	22.13		13.67	1239.7	808.6	233.6
High	[K].VFEKDEAKFECEVSR.[E]	1xCarbamidomethyl [C11]; 2xTMTpro [K4; K8]; 1xTMTpro [N-Term]	1.37065e-05	2.82963e-05	1	1	1	2	A2ASS6	A2ASS6 [13640-13654]	A2ASS6 1xCarbamidomethyl [C13650]	Titin OS=Mus musculus OX=10090 GN=Ttn PE=1 SV=1	2	2785.5	0.715	0.266	1.95	0.223	0.121	0.336	0.774191	0.215366	0.72827	0.0138921	0.00269375	0.314686	0.999984	0.953189	0.999996	0.214574	0.115353	0.994122	1234.8	459.4	3368.8	385.6	209.5	1727.2	580.1	53.65	14.83	35.41	5.76	7.5		21.45	606.4	503.3	452.7
High	[K].GNAICSGK.[L]	1xCarbamidomethyl [C5]; 1xTMTpro [K8]; 1xTMTpro [N-Term]	0.000167958	2.82963e-05	1	1	1	2	A2ASS6	A2ASS6 [1373-1380]	A2ASS6 1xCarbamidomethyl [C1377]	Titin OS=Mus musculus OX=10090 GN=Ttn PE=1 SV=1	0	1414.8	0.486	0.176	4.794	0.028	0.036	0.072	0.36712	0.074117	0.234011	4.57296e-08	2.59319e-05	0.00383507	0.993579	0.810598	0.938924	1.31554e-05	0.00449207	0.196448	893.7	324	8820.8	51.3	66.1	1839.9	133.2	60.86	2.39	8.17	72.54	6.99		0.39	466.5	342.7	292.3
High	[K].LQDYTGVEKDEVILQCEISK.[A]	1xCarbamidomethyl [C16]; 2xTMTpro [K9; K20]; 1xTMTpro [N-Term]	2.4312e-09	2.82963e-05	1	1	1	2	A2ASS6	A2ASS6 [13813-13832]	A2ASS6 1xCarbamidomethyl [C13828]	Titin OS=Mus musculus OX=10090 GN=Ttn PE=1 SV=1	1	3279.8	0.423	0.174	2.581	0.045	0.03	0.115	0.203014	0.0326408	0.728979	1.40628e-06	4.46343e-07	0.129999	0.922324	0.700573	0.999996	0.000195304	0.000197002	0.904987	2220.5	913.9	13547.2	236.8	156.9	5248.8	602.7	63.23	29.22	36.33		8.19		18.6	1183.4	834	999.8
High	[K].IHVLILHNCR.[L]	1xCarbamidomethyl [C9]; 1xTMTpro [N-Term]	5.63566e-06	2.82963e-05	1	1	1	2	A2ASS6	A2ASS6 [13949-13958]	A2ASS6 1xCarbamidomethyl [C13957]	Titin OS=Mus musculus OX=10090 GN=Ttn PE=1 SV=1	0	1578.92	1.2	0.51	1.987	0.91	0.865	0.598	0.407744	0.570923	0.177753	0.986543	0.908981	0.976974	0.996109	0.999952	0.891567	1	0.999916	0.999948	673.8	286.6	1115.4	510.7	485.6	561.5	335.8	30.15	0.95	1.77	0.4	1.09		1.63	275.6	329.7	252.5
High	[K].EPPVEFTKPLEDQTVEEEATAVLECEVSR.[E]	1xCarbamidomethyl [C25]; 1xTMTpro [K8]; 1xTMTpro [N-Term]	3.96963e-14	2.82963e-05	1	1	1	2	A2ASS6	A2ASS6 [14071-14099]	A2ASS6 1xCarbamidomethyl [C14095]	Titin OS=Mus musculus OX=10090 GN=Ttn PE=1 SV=1	1	3940	1.235	0.24	3.936	0.058	0.139	0.291	0.816951	0.120416	0.356218	2.58876e-07	0.00307127	0.26555	0.999984	0.878762	0.989327	5.18074e-05	0.124787	0.994122	2123.3	412.6	6764.8	100.5	238.7	1718.6	500.5	56.59	15.72	19.6	44.79	12.49		1.43	1068.6	844.5	409.2
High	[K].LIIHGCTPEDIK.[T]	1xCarbamidomethyl [C6]; 1xTMTpro [K12]; 1xTMTpro [N-Term]	4.77235e-07	2.82963e-05	1	1	1	2	A2ASS6	A2ASS6 [14130-14141]	A2ASS6 1xCarbamidomethyl [C14135]	Titin OS=Mus musculus OX=10090 GN=Ttn PE=1 SV=1	0	2004.14	2.324	0.384	1.974	0.227	0.261	0.5	0.463904	0.313827	0.554956	0.0135833	0.0464425	0.732759	0.996109	0.989613	0.999526	0.2108	0.543939	0.995093	3247.1	536.8	2757.5	317.5	364.1	1397.3	698.3	60.42	5.14	20.6	6.23	1.84		15.56	1688.5	1249.9	493.8
High	[K].TYTCDAK.[D]	1xCarbamidomethyl [C4]; 1xTMTpro [K7]; 1xTMTpro [N-Term]	0.00237866	0.000117823	1	1	1	1	A2ASS6	A2ASS6 [14142-14148]	A2ASS6 1xCarbamidomethyl [C14145]	Titin OS=Mus musculus OX=10090 GN=Ttn PE=1 SV=1	0	1466.78	2.232	0.201	1.693	0.091	0.13	0.262	0.25884	0.0927075	0.397611	1.88245e-05	0.0140065	0.250156	0.962291	0.842678	0.994179	0.00152777	0.299181	0.991359	2159.5	194.4	1637.3	87.7	125.8	967.3	253.9	66.96	4.11	29.68	5.01	19.65		27.06	1190	784.4	177.5
High	[R].FECEISKENEK.[V]	1xCarbamidomethyl [C3]; 2xTMTpro [K7; K11]; 1xTMTpro [N-Term]	3.44246e-07	2.82963e-05	1	1	1	1	A2ASS6	A2ASS6 [14182-14192]	A2ASS6 1xCarbamidomethyl [C14184]	Titin OS=Mus musculus OX=10090 GN=Ttn PE=1 SV=1	1	2325.26	0.495	0.279	1.524	0.161	0.162	0.296	0.543465	0.16422	0.468542	0.00306493	0.0101227	0.242459	0.996109	0.918091	0.999091	0.0744738	0.245202	0.987658	533.2	300.6	1640.7	173.4	174.5	1076.6	318.4	45.66	10.63	26.33	4.69	6.12		20.27	245.5	231.8	287.5
High	[K].LVCEVSKPGAEVIWYKGDEEIIETGR.[F]	1xCarbamidomethyl [C3]; 2xTMTpro [K7; K16]; 1xTMTpro [N-Term]	0.0410964	0.00296648	1	1	1	1	A2ASS6	A2ASS6 [14271-14296]	A2ASS6 1xCarbamidomethyl [C14273]	Titin OS=Mus musculus OX=10090 GN=Ttn PE=1 SV=1	1	3890.12	1.169	0.59	4.661	0.348	0.27	1.041	0.475383	0.619287	0.0254329	0.141238	0.0876782	0.535969	0.996109	0.999952	0.480513	0.745647	0.702036	0.994122	536.9	270.7	2140.3	159.9	124	459.2	477.8	48.62	10.95	28.57	22.88	3.03		9.67	253.1	228	222.2
High	[R].ILIIQNAQLEDAGSYNCR.[L]	1xCarbamidomethyl [C17]; 1xTMTpro [N-Term]	4.17271e-10	2.82963e-05	1	1	1	3	A2ASS6	A2ASS6 [14307-14324]	A2ASS6 1xCarbamidomethyl [C14323]	Titin OS=Mus musculus OX=10090 GN=Ttn PE=1 SV=1	0	2382.24	1.17	0.636	4.875	0.235	0.261	0.906	0.770483	0.741226	0.236008	0.0209994	0.0711299	0.838144	0.999984	0.999952	0.940108	0.281097	0.650026	0.997925	1547.8	842	6451.4	311.3	345.9	1323.3	1199.1	41.34	3.82	1.78	21.42	3.17		11.77	689	696	727
High	[K].AEFVCTISK.[E]	1xCarbamidomethyl [C5]; 1xTMTpro [K9]; 1xTMTpro [N-Term]	3.11305e-05	2.82963e-05	1	1	1	1	A2ASS6	A2ASS6 [14358-14366]	A2ASS6 1xCarbamidomethyl [C14362]	Titin OS=Mus musculus OX=10090 GN=Ttn PE=1 SV=1	0	1662.94	1.768	0.149	2.582	0.127	0.099	0.287	0.463753	0.0579467	0.508556	0.00243088	0.00083972	0.266207	0.996109	0.773761	0.999526	0.0619531	0.0530506	0.994122	2466.1	207.7	3600.7	177.1	138.5	1394.5	400.4	58.96	0.1	22.74	6.14	14.97		16.29	1266.3	961.3	184.4
High	[K].EQQEVVFNCEVNTEGAK.[A]	1xCarbamidomethyl [C9]; 1xTMTpro [K17]; 1xTMTpro [N-Term]	3.50379e-10	2.82963e-05	1	1	1	3	A2ASS6	A2ASS6 [14442-14458]	A2ASS6 1xCarbamidomethyl [C14450]	Titin OS=Mus musculus OX=10090 GN=Ttn PE=1 SV=1	0	2589.31	1.198	0.251	2.495	0.139	0.111	0.257	0.887647	0.141198	0.763832	0.00133733	0.00138647	0.290874	0.999984	0.897118	0.999996	0.0402489	0.0755178	0.994122	3358.1	703.1	6992.6	388.7	312.2	2802.4	721	50.03	16.06	26.21	7.8	6.6		14.11	1601.1	1409.8	699
High	[K].VKEQQEVVFNCEVNTEGAK.[A]	1xCarbamidomethyl [C11]; 2xTMTpro [K2; K19]; 1xTMTpro [N-Term]	1.70402e-11	2.82963e-05	1	1	1	3	A2ASS6	A2ASS6 [14440-14458]	A2ASS6 1xCarbamidomethyl [C14450]	Titin OS=Mus musculus OX=10090 GN=Ttn PE=1 SV=1	1	3120.68	0.958	0.332	2.422	0.202	0.242	0.666	0.976907	0.275114	0.610797	0.00299444	0.0506173	0.851659	0.999984	0.974193	0.999526	0.0730363	0.562376	0.997925	1652.9	572.1	4177.1	349.2	416.6	1724.5	1149.3	41.03	11.65	22.84	0.58	9.55		11.63	734	745	551.2
High	[K].KSVTFWCK.[V]	1xCarbamidomethyl [C7]; 2xTMTpro [K1; K8]; 1xTMTpro [N-Term]	0.069575	0.00480857	1	1	1	1	A2ASS6	A2ASS6 [14538-14545]	A2ASS6 1xCarbamidomethyl [C14544]	Titin OS=Mus musculus OX=10090 GN=Ttn PE=1 SV=1	1	1968.16	1.522	0.796	1.609	0.657	0.461	0.534	0.339924	0.97787	0.298552	0.524291	0.451727	0.81208	0.987965	0.999952	0.970521	1	0.99991	0.997925	1235	646.1	1305.4	532.8	374.5	811.5	433.1	17.01	2.57	8.68	6.71	4.5		11.79	459.1	665	562.8
High	[K].KSVTFWCKVNR.[L]	1xCarbamidomethyl [C7]; 2xTMTpro [K1; K8]; 1xTMTpro [N-Term]	0.125382	0.007323	1	1	1	1	A2ASS6	A2ASS6 [14538-14548]	A2ASS6 1xCarbamidomethyl [C14544]	Titin OS=Mus musculus OX=10090 GN=Ttn PE=1 SV=1	2	2337.37	1.305	0.558	1.922	0.617	0.553	1.4	0.435555	0.692371	0.125193	0.553738	0.637434	0.370299	0.996109	0.999952	0.826164	1	0.99991	0.994122	838.5	358.4	1234.7	396.6	355.3	642.5	899.8	28.13	6.9	17.81	8.13	0.45		5.01	337.9	416.5	333.8
High	[K].SVTFWCK.[V]	1xCarbamidomethyl [C6]; 1xTMTpro [K7]; 1xTMTpro [N-Term]	0.00155154	9.06176e-05	1	1	1	1	A2ASS6	A2ASS6 [14539-14545]	A2ASS6 1xCarbamidomethyl [C14544]	Titin OS=Mus musculus OX=10090 GN=Ttn PE=1 SV=1	0	1535.85	1.929	0.28	2.317	0.322	0.238	0.402	0.753453	0.171236	0.703841	0.0442371	0.0361714	0.518372	0.999984	0.924486	0.999996	0.432177	0.491235	0.994122	3741.9	543.3	4494	624.4	462	1940	780.6	44.24	0.99	16.11	7.39	1.8		8.53	1703.7	1645	485.3
High	[K].HSLIIKDCGFPDEGEYVVTAGQDK.[S]	1xCarbamidomethyl [C8]; 2xTMTpro [K6; K24]; 1xTMTpro [N-Term]	1.44176e-11	2.82963e-05	1	1	1	2	A2ASS6	A2ASS6 [14577-14600]	A2ASS6 1xCarbamidomethyl [C14584]	Titin OS=Mus musculus OX=10090 GN=Ttn PE=1 SV=1	1	3590.9	1.31	0.23	1.753	0.171	0.146	0.369	0.860522	0.127444	0.869873	0.00259637	0.00592932	0.422098	0.999984	0.885605	0.999996	0.0651518	0.182214	0.994122	2531.9	445.3	3387.6	331.4	283	1932.8	713.1	53.27	15.25	31.12	3.39	7.71		3.07	1239.5	1035.2	440.2
High	[K].CLEGQTAR.[F]	1xCarbamidomethyl [C1]; 1xTMTpro [N-Term]	0.00252523	0.000117823	1	1	1	1	A2ASS6	A2ASS6 [1474-1481]	A2ASS6 1xCarbamidomethyl [C1474]	Titin OS=Mus musculus OX=10090 GN=Ttn PE=1 SV=1	0	1238.65	1.722	0.097	2.524	0.061	0.331	0.055	0.224703	0.00308151	0.160133	5.29694e-06	0.204041	0.00307846	0.941839	0.30015	0.874809	0.000543527	0.916953	0.167265	1262.6	71.1	1850.5	44.4	242.5	733.3	40.1	70.48	7.29	14.21	0.7	33.25			718.8	443.9	66.4
High	[K].IHRLQICDIKPR.[D]	1xCarbamidomethyl [C7]; 1xTMTpro [K10]; 1xTMTpro [N-Term]	0.13837	0.00802363	1	1	1	1	A2ASS6	A2ASS6 [14754-14765]	A2ASS6 1xCarbamidomethyl [C14760]	Titin OS=Mus musculus OX=10090 GN=Ttn PE=1 SV=1	1	2157.29	0.901	0.682	2.52	0.692	0.246	0.346	0.762957	0.635167	0.0718908	0.571226	0.0397001	0.462515	0.999984	0.999952	0.703529	1	0.507594	0.994122	169.1	128.1	473.1	129.9	46.1	187.7	64.9	14.19	8.19	16.79	2.55	3.81		30.97	61.6	92.9	107.2
High	[R].LQICDIKPR.[D]	1xCarbamidomethyl [C4]; 1xTMTpro [K7]; 1xTMTpro [N-Term]	0.000102553	2.82963e-05	1	1	1	1	A2ASS6	A2ASS6 [14757-14765]	A2ASS6 1xCarbamidomethyl [C14760]	Titin OS=Mus musculus OX=10090 GN=Ttn PE=1 SV=1	1	1751.05	0.987	0.147	3.097	0.089	0.112	0.109	0.713834	0.0168188	0.131273	0.000166101	0.00388037	0.0358203	0.999058	0.593377	0.836105	0.00833992	0.141929	0.634678	696.8	103.9	2186.1	62.6	79.2	706	76.8	57.71	24.59	21.48	6.15	12.2		29.53	354	274.5	109.9
High	[R].ADSCEFTVTGLQK.[G]	1xCarbamidomethyl [C4]; 1xTMTpro [K13]; 1xTMTpro [N-Term]	5.65437e-10	2.82963e-05	1	1	1	2	A2ASS6	A2ASS6 [14932-14944]	A2ASS6 1xCarbamidomethyl [C14935]	Titin OS=Mus musculus OX=10090 GN=Ttn PE=1 SV=1	0	2064.09	2.441	0.206	2.358	0.201	0.173	0.45	0.231374	0.0777251	0.235961	0.0182372	0.0419564	0.642546	0.945342	0.820743	0.940108	0.256595	0.518196	0.995093	2282.3	192.4	2205	188.3	162.1	935.1	420.5	63.59	6.45	22.01	3.82	22.64		23.7	1220.2	854.5	178.6
High	[R].IKGYIVEKCPR.[G]	1xCarbamidomethyl [C9]; 2xTMTpro [K2; K8]; 1xTMTpro [N-Term]	0.0780497	0.00527636	1	1	1	1	A2ASS6	A2ASS6 [15408-15418]	A2ASS6 1xCarbamidomethyl [C15416]	Titin OS=Mus musculus OX=10090 GN=Ttn PE=1 SV=1	2	2275.38	0.567	0.443	2.913	0.617	0.202	0.361	0.594775	0.463888	0.493449	0.344307	0.0186847	0.463519	0.996109	0.999596	0.999091	0.9576	0.355804	0.994122	875.8	685.4	4503.1	953.6	311.8	1545.9	557.3	29.86	3.63	25.06	4.43	7.48		6.32	357.5	429.5	623.8
High	[K].RSDTGTYIIEAVNVCGR.[A]	1xCarbamidomethyl [C15]; 1xTMTpro [N-Term]	6.79637e-12	2.82963e-05	1	1	1	3	A2ASS6	A2ASS6 [15544-15560]	A2ASS6 1xCarbamidomethyl [C15558]	Titin OS=Mus musculus OX=10090 GN=Ttn PE=1 SV=1	1	2215.15	0.916	0.567	4.959	0.411	0.431	1.319	0.757995	0.691738	0.115619	0.284127	0.376881	0.380511	0.999984	0.999952	0.809307	0.92654	0.990648	0.994122	646.4	400.2	3499	290	303.9	705.6	930.6	13.9	1.78	5.1	5.52	9.93		13.04	235	355.9	350.6
High	[R].SDTGTYIIEAVNVCGR.[A]	1xCarbamidomethyl [C14]; 1xTMTpro [N-Term]	9.92837e-11	2.82963e-05	1	1	1	3	A2ASS6	A2ASS6 [15545-15560]	A2ASS6 1xCarbamidomethyl [C15558]	Titin OS=Mus musculus OX=10090 GN=Ttn PE=1 SV=1	0	2059.04	0.501	0.256	4.149	0.119	0.189	0.267	0.459432	0.154977	0.314437	0.000412829	0.0196706	0.267568	0.996109	0.912962	0.981519	0.0165029	0.364594	0.994122	741.7	378.6	6136.7	176.7	279	1479.1	394.4	45.76	1.77	13.84	47.82	11.11		6.48	341.8	322.2	340.1
High	[K].DAVTLTWCEPDDDGGSPITGYWVER.[L]	1xCarbamidomethyl [C8]; 1xTMTpro [N-Term]	6.79079e-11	2.82963e-05	1	1	1	1	A2ASS6	A2ASS6 [15686-15710]	A2ASS6 1xCarbamidomethyl [C15693]	Titin OS=Mus musculus OX=10090 GN=Ttn PE=1 SV=1	0	3143.46	0.571	0.365	4.293	0.286	0.359	0.697	0.789325	0.278029	0.101084	0.0729175	0.276693	0.862997	0.999984	0.975559	0.780142	0.560731	0.968711	0.998045	350.2	224.1	2633.7	175.4	220	613.5	427.7	45.7	2.16	10.99	8.51	10.7		7.92	161.3	152.2	195.8
High	[K].AGESEPSEPSDPVLCR.[E]	1xCarbamidomethyl [C15]; 1xTMTpro [N-Term]	1.85101e-10	2.82963e-05	1	1	1	2	A2ASS6	A2ASS6 [15852-15867]	A2ASS6 1xCarbamidomethyl [C15866]	Titin OS=Mus musculus OX=10090 GN=Ttn PE=1 SV=1	0	2033.98	1.816	0.345	3.814	0.72	0.678	0.555	0.241036	0.303265	0.161537	0.691635	0.744084	0.815158	0.949643	0.98902	0.876571	1	0.99991	0.997925	1335	253.6	2804.1	529	498.4	735.2	407.7	59.77	6.95	3.65	31.88	27.86		5.52	690.3	516.8	236.3
High	[K].TSGPDCNFR.[V]	1xCarbamidomethyl [C6]; 1xTMTpro [N-Term]	0.00579897	0.000397541	1	1	1	2	A2ASS6	A2ASS6 [16025-16033]	A2ASS6 1xCarbamidomethyl [C16030]	Titin OS=Mus musculus OX=10090 GN=Ttn PE=1 SV=1	0	1357.65	1.004	0.145	3.148	0.065	0.058	0.123	0.933729	0.0196083	0.472871	4.82673e-06	4.24503e-05	0.0274205	0.999984	0.61552	0.999091	0.000509892	0.00636162	0.55917	1541.6	222.1	4834.3	100.2	88.7	1535.6	188.3	74.99	13.48	21.52	34.55	17.18		17.78	916.6	519	216.8
High	[K].TSGPDCNFRVTDVIEGTEVQFQVR.[A]	1xCarbamidomethyl [C6]; 1xTMTpro [N-Term]	5.98876e-06	2.82963e-05	1	1	1	1	A2ASS6	A2ASS6 [16025-16048]	A2ASS6 1xCarbamidomethyl [C16030]	Titin OS=Mus musculus OX=10090 GN=Ttn PE=1 SV=1	1	3058.52	0.98	0.753	3.369	1.025	0.555	1.74	0.644717	0.666663	0.00967613	0.790867	0.394263	0.29973	0.996109	0.999952	0.309023	1	0.994803	0.994122	217.8	167.4	748.9	227.9	123.4	222.3	386.9	12.52	0.21	9.5	1.72	3.26		2.63	78.4	121.1	148.3
High	[K].NGGSPIIGYHVEMCPVGTEK.[W]	1xCarbamidomethyl [C14]; 1xTMTpro [K20]; 1xTMTpro [N-Term]	9.31229e-07	2.82963e-05	1	1	1	1	A2ASS6	A2ASS6 [16100-16119]	A2ASS6 1xCarbamidomethyl [C16113]	Titin OS=Mus musculus OX=10090 GN=Ttn PE=1 SV=1	0	2753.42	0.606	0.441	1.909	0.633	0.28	1.141	0.790914	0.376131	0.155443	0.524461	0.143142	0.472187	0.999984	0.996752	0.867675	1	0.828905	0.994122	298.8	217.3	940.7	311.8	138	492.7	562.4	60.95	1.23	27.61	27.72	1.55		0.51	156.1	114.5	191.1
High	[R].CKVNVEVEFAEPEPER.[K]	1xCarbamidomethyl [C1]; 1xTMTpro [K2]; 1xTMTpro [N-Term]	6.67194e-08	2.82963e-05	1	1	1	1	A2ASS6	A2ASS6 [1649-1664]	A2ASS6 1xCarbamidomethyl [C1649]	Titin OS=Mus musculus OX=10090 GN=Ttn PE=1 SV=1	1	2540.33	0.835	0.248	3.101	0.11	0.143	0.292	0.975968	0.146683	0.406884	0.00024367	0.00530307	0.26096	0.999984	0.904057	0.996438	0.0110578	0.171207	0.994122	1143.7	339.3	4250	151.3	196.5	1370.4	399.6	65.09	5.77	16.31	16.17	10.96		3.77	619.7	422.5	313.5
High	[K].APCSVSVLDTPGPPINFVFEDIR.[K]	1xCarbamidomethyl [C3]; 1xTMTpro [N-Term]	5.86845e-09	2.82963e-05	1	1	1	1	A2ASS6	A2ASS6 [16581-16603]	A2ASS6 1xCarbamidomethyl [C16583]	Titin OS=Mus musculus OX=10090 GN=Ttn PE=1 SV=1	0	2834.47	0.75	0.551	4.271	0.34	0.56	0.531	0.926682	0.297168	0.00294795	0.10557	0.450867	0.759387	0.999984	0.98483	0.181939	0.664005	0.99991	0.995903	144.7	106.3	824.1	65.6	108	193	102.5	20.63	3.13	2.5	2.42	1.64		0.77	55.2	75.9	92.2
High	[R].FGPGPPCVSKPLLAK.[D]	1xCarbamidomethyl [C7]; 2xTMTpro [K10; K15]; 1xTMTpro [N-Term]	1.84645e-07	2.82963e-05	1	1	1	1	A2ASS6	A2ASS6 [16672-16686]	A2ASS6 1xCarbamidomethyl [C16678]	Titin OS=Mus musculus OX=10090 GN=Ttn PE=1 SV=1	1	2480.49	0.989	0.239	2.499	0.182	0.177	0.323	0.78029	0.143446	0.398934	0.00461848	0.024831	0.375676	0.999984	0.900885	0.994179	0.100478	0.412267	0.994122	1179.6	284.5	2979.8	216.9	211.2	1192.2	385.5	47.15	8.2	28.21	11.29	3.39		1.84	549.6	506.8	267.5
High	[R].VCAENAAGPGK.[F]	1xCarbamidomethyl [C2]; 1xTMTpro [K11]; 1xTMTpro [N-Term]	9.97947e-08	2.82963e-05	1	1	1	2	A2ASS6	A2ASS6 [16765-16775]	A2ASS6 1xCarbamidomethyl [C16766]	Titin OS=Mus musculus OX=10090 GN=Ttn PE=1 SV=1	0	1681.92	2.094	0.244	1.87	0.198	0.358	0.584	0.252529	0.133622	0.473529	0.00931874	0.126051	0.90401	0.957682	0.891901	0.999091	0.164071	0.794013	0.998395	2386.7	277.7	2131.8	226	407.6	1139.9	665.5	47.64	8.7	26.78	5.12	17.08		15.55	1116.3	1021.4	262
High	[R].YVITATNSCGSK.[F]	1xCarbamidomethyl [C9]; 1xTMTpro [K12]; 1xTMTpro [N-Term]	2.39258e-08	2.82963e-05	1	1	1	2	A2ASS6	A2ASS6 [16963-16974]	A2ASS6 1xCarbamidomethyl [C16971]	Titin OS=Mus musculus OX=10090 GN=Ttn PE=1 SV=1	0	1909.03	0.707	0.29	3.31	0.144	0.136	0.273	0.788446	0.187252	0.442063	0.00117054	0.00490373	0.277196	0.999984	0.937973	0.999091	0.0365454	0.163919	0.994122	1040.8	426.7	4871.2	212.5	199.6	1471.5	401	29.6	7.31	17.63	18.92	4.07		17.12	424	511.4	398.6
High	[K].MCLLNWSDPADDGGSDITGFIIER.[K]	1xCarbamidomethyl [C2]; 1xTMTpro [N-Term]	6.94163e-10	2.82963e-05	1	1	1	1	A2ASS6	A2ASS6 [17001-17024]	A2ASS6 1xCarbamidomethyl [C17002]	Titin OS=Mus musculus OX=10090 GN=Ttn PE=1 SV=1	0	2986.42	1.533	1.14	1.226	0.881	1.232	1.639	0.218311	0.773107	0.54829	0.876792	0.503167	0.294956	0.934827	0.999952	0.999526	1	0.99991	0.994122	191.7	142.6	153.3	110.2	154.1	125.1	205	18.09	2.88	5.31	8.07	3.53		27.33	71.8	102.4	129.1
High	[R].SKCDITGLIEGQEYK.[F]	1xCarbamidomethyl [C3]; 2xTMTpro [K2; K15]; 1xTMTpro [N-Term]	1.33301e-08	2.82963e-05	1	1	1	1	A2ASS6	A2ASS6 [17041-17055]	A2ASS6 1xCarbamidomethyl [C17043]	Titin OS=Mus musculus OX=10090 GN=Ttn PE=1 SV=1	1	2653.47	0.74	0.184	2.368	0.089	0.086	0.268	0.776601	0.0905726	0.680891	2.01834e-05	0.000367879	0.224684	0.999984	0.838621	0.999996	0.00160075	0.0292668	0.976064	1415.3	352.6	4526.8	169.3	164.5	1911.8	513.3	49.36	21.82	33.33	16.72	0.16		0.44	671.1	597.4	365.4
High	[K].FGCGPPVEIGPILAVDPLGPPTSPER.[L]	1xCarbamidomethyl [C3]; 1xTMTpro [N-Term]	1.81079e-11	2.82963e-05	1	1	1	1	A2ASS6	A2ASS6 [17064-17089]	A2ASS6 1xCarbamidomethyl [C17066]	Titin OS=Mus musculus OX=10090 GN=Ttn PE=1 SV=1	0	2976.58	1.669	0.525	2.552	0.448	0.62	0.866	0.247365	0.667439	0.083361	0.361433	0.788185	0.705408	0.953013	0.999952	0.733519	0.968507	0.99991	0.995093	977.4	307.4	1494.1	262.5	363.3	585.6	507.1	22.79	0.15	4.77	9.79	4.77		15.64	378.8	504.8	272.4
High	[R].LCPTTSFLVENLDEHQMYEFR.[V]	1xCarbamidomethyl [C2]; 1xTMTpro [N-Term]	2.04314e-10	2.82963e-05	1	1	1	1	A2ASS6	A2ASS6 [17137-17157]	A2ASS6 1xCarbamidomethyl [C17138]	Titin OS=Mus musculus OX=10090 GN=Ttn PE=1 SV=1	0	2933.41	1.292	0.833	4.445	0.414	0.45	0.842	0.33819	0.963552	0.0249322	0.179995	0.360215	0.738543	0.987736	0.999952	0.477689	0.813378	0.989798	0.995093	544.6	351	1873.3	174.7	189.8	421.5	355.1	41.27	4.4	2.1	1.63	2.81		7.24	242.3	245	301.8
High	[R].FGPAHFECR.[L]	1xCarbamidomethyl [C8]; 1xTMTpro [N-Term]	0.000142133	2.82963e-05	1	1	1	3	A2ASS6	A2ASS6 [1723-1731]	A2ASS6 1xCarbamidomethyl [C1730]	Titin OS=Mus musculus OX=10090 GN=Ttn PE=1 SV=1	0	1424.71	1.22	0.247	4.04	0.2	0.287	0.196	0.729739	0.174057	0.319385	0.013852	0.0953989	0.174671	0.999984	0.928806	0.982386	0.214263	0.72521	0.947297	1573.6	319.1	5211	257.6	370.1	1289.9	252.5	53.27	16.73	2.45	17.36	23.94		3.97	770.4	643.4	318.8
High	[K].RFGPAHFECR.[L]	1xCarbamidomethyl [C9]; 1xTMTpro [N-Term]	2.90737e-05	2.82963e-05	1	1	1	4	A2ASS6	A2ASS6 [1722-1731]	A2ASS6 1xCarbamidomethyl [C1730]	Titin OS=Mus musculus OX=10090 GN=Ttn PE=1 SV=1	1	1580.81	0.775	0.589	4.918	0.474	0.434	0.426	0.955146	0.748287	0.185562	0.329962	0.380952	0.575465	0.999984	0.999952	0.901122	0.950302	0.99191	0.995093	618	469.5	3919.7	377.7	345.8	797	339.2	28.91	5.63	8.41	0.15	1.82		8.77	250.5	305.2	400.2
High	[K].YGISDECKSDK.[V]	1xCarbamidomethyl [C7]; 2xTMTpro [K8; K11]; 1xTMTpro [N-Term]	0.00425167	0.000288586	1	1	1	1	A2ASS6	A2ASS6 [17368-17378]	A2ASS6 1xCarbamidomethyl [C17374]	Titin OS=Mus musculus OX=10090 GN=Ttn PE=1 SV=1	1	2214.19	0.515	0.146	1.347	0.04	0.087	0.173	0.447715	0.0381311	0.904309	2.87135e-07	0.000289424	0.0799311	0.996109	0.729562	0.999996	5.47425e-05	0.0243479	0.81191	1149.8	326.1	3006.2	89.1	194.3	2232.5	387.2	69.71	24.17	43.68		5.58		22.25	649.9	407.2	343.8
High	[R].AMAINAAGIGPPSEPSDPAVAGDPIYPPGPPSCPEVK.[D]	1xCarbamidomethyl [C33]; 1xTMTpro [K37]; 1xTMTpro [N-Term]	1.43584e-06	2.82963e-05	1	1	1	1	A2ASS6	A2ASS6 [17467-17503]	A2ASS6 1xCarbamidomethyl [C17499]	Titin OS=Mus musculus OX=10090 GN=Ttn PE=1 SV=1	0	4235.16	1.127	0.836	2.618	0.514	0.622	1.521	0.453658	0.921759	0.0561988	0.240984	0.628084	0.282818	0.996109	0.999952	0.654637	0.88745	0.99991	0.994122	356.2	264.1	827.4	162.4	196.5	316	480.6	32.17	1.02	5.58	0.28	0.16		3.82	147.9	171.7	232.6
High	[R].MINEFGYCSLDYGAAYSR.[D]	1xCarbamidomethyl [C8]; 1xTMTpro [N-Term]	3.19588e-09	2.82963e-05	1	1	1	2	A2ASS6	A2ASS6 [1759-1776]	A2ASS6 1xCarbamidomethyl [C1766]	Titin OS=Mus musculus OX=10090 GN=Ttn PE=1 SV=1	0	2421.12	0.867	0.586	8.047	0.217	0.211	0.805	0.942024	0.726013	0.0576569	0.0252499	0.0713598	0.728655	0.999984	0.999952	0.66358	0.312664	0.650107	0.995093	864.6	584.7	8022.6	215.9	210.6	997	802.2	36.25	15.63	11.63	31.95	3.75		6.99	370.2	404.2	464.2
High	[K].DGVHDIPEDAQLETAENSSVIIIPECTR.[A]	1xCarbamidomethyl [C26]; 1xTMTpro [N-Term]	4.9775e-12	2.82963e-05	1	1	1	1	A2ASS6	A2ASS6 [17645-17672]	A2ASS6 1xCarbamidomethyl [C17670]	Titin OS=Mus musculus OX=10090 GN=Ttn PE=1 SV=1	0	3412.69	0.753	0.493	4.436	0.255	0.221	1.131	0.985356	0.339464	0.00539584	0.0199944	0.0135832	0.557734	0.999984	0.991935	0.237325	0.273322	0.294317	0.995093	216.4	141.6	1274.7	73.2	63.6	287.3	325	41.86	10.38	2.74	5.76	8.98		4.45	96.7	96.9	135.2
High	[K].VSDITRGSCR.[L]	1xCarbamidomethyl [C9]; 1xTMTpro [N-Term]	0.00151695	9.06176e-05	1	1	1	1	A2ASS6	A2ASS6 [17709-17718]	A2ASS6 1xCarbamidomethyl [C17717]	Titin OS=Mus musculus OX=10090 GN=Ttn PE=1 SV=1	1	1454.77	1.552	0.39	6.23	0.174	0.134	0.293	0.216067	0.148803	0.00167232	0.000614758	0.0013596	0.293346	0.931531	0.905278	0.13641	0.0222306	0.0746275	0.994122	406.7	102.2	1632.7	45.6	35	262.1	76.8	53.7	6.85	1.74	14	17.42		17.28	199.8	165.7	86.4
High	[K].NDGGSPVTHYIVECLAWDPTGK.[K]	1xCarbamidomethyl [C14]; 1xTMTpro [K22]; 1xTMTpro [N-Term]	2.39848e-11	2.82963e-05	1	1	1	1	A2ASS6	A2ASS6 [17826-17847]	A2ASS6 1xCarbamidomethyl [C17839]	Titin OS=Mus musculus OX=10090 GN=Ttn PE=1 SV=1	0	3024.54	1.32	0.503	1.79	0.274	0.343	1.423	0.496859	0.60745	0.336775	0.0582409	0.165328	0.431484	0.996109	0.999952	0.984191	0.500539	0.866077	0.994122	1265.9	482.2	1715.7	262.6	329.3	958.7	1364.5	53.17	7.42	23.33	7.32	10.86		2.56	619.2	518	450.8
High	[R].DSGVITCR.[A]	1xCarbamidomethyl [C7]; 1xTMTpro [N-Term]	0.00280346	0.000117823	1	1	1	1	A2ASS6	A2ASS6 [1777-1784]	A2ASS6 1xCarbamidomethyl [C1783]	Titin OS=Mus musculus OX=10090 GN=Ttn PE=1 SV=1	0	1211.64	0.68	0.13	4.684	0.071	0.034	0.067	0.956548	0.0216954	0.156621	3.53586e-05	1.46802e-06	0.0172541	0.999984	0.630888	0.868695	0.00246592	0.000487624	0.445346	456.8	87.5	3146.8	48	23	671.8	45.3	66.46	8.12	7.48		14.51		16.96	250.6	166.7	82.2
High	[K].DQTCPPAIELK.[E]	1xCarbamidomethyl [C4]; 1xTMTpro [K11]; 1xTMTpro [N-Term]	1.17947e-07	2.82963e-05	1	1	1	1	A2ASS6	A2ASS6 [17902-17912]	A2ASS6 1xCarbamidomethyl [C17905]	Titin OS=Mus musculus OX=10090 GN=Ttn PE=1 SV=1	0	1880.04	1.969	0.223	1.898	0.151	0.171	0.317	0.369171	0.128217	0.365323	0.00657071	0.0245422	0.40532	0.994266	0.886326	0.989327	0.12742	0.408868	0.994122	1972.9	223.8	1902	151.1	171.1	1002.1	317.6	47.94	0.04	25.02	6.24	7.66		15.34	925	842.3	198.5
High	[K].QVVDDTCTLVIPQSR.[R]	1xCarbamidomethyl [C7]; 1xTMTpro [N-Term]	3.1477e-09	2.82963e-05	1	1	1	3	A2ASS6	A2ASS6 [17962-17976]	A2ASS6 1xCarbamidomethyl [C17968]	Titin OS=Mus musculus OX=10090 GN=Ttn PE=1 SV=1	0	2035.08	1.268	0.279	5.628	0.154	0.16	0.536	0.700499	0.165019	0.165664	0.00228556	0.00748878	0.797787	0.999058	0.918091	0.881259	0.0596281	0.209844	0.997925	1653.5	363.4	7340.3	200.3	208.6	1304.3	699	51.49	0.54	0.63	36.08	8.8		9.94	797.8	686	321.1
High	[K].QVVDDTCTLVIPQSRR.[S]	1xCarbamidomethyl [C7]; 1xTMTpro [N-Term]	4.89441e-10	2.82963e-05	1	1	1	1	A2ASS6	A2ASS6 [17962-17977]	A2ASS6 1xCarbamidomethyl [C17968]	Titin OS=Mus musculus OX=10090 GN=Ttn PE=1 SV=1	1	2191.18	0.849	0.83	4.735	0.609	0.595	0.819	0.912611	0.849497	0.00232986	0.463291	0.555091	0.870604	0.999984	0.999952	0.158038	1	0.99991	0.998045	153.4	149.9	855.4	110	107.5	180.7	147.9	23.36	3	7.97	7.52	2.06		11.16	59.7	78.9	130.2
High	[R].VSSEPKECMYTIPK.[L]	1xCarbamidomethyl [C8]; 2xTMTpro [K6; K14]; 1xTMTpro [N-Term]	9.2338e-06	2.82963e-05	1	1	1	1	A2ASS6	A2ASS6 [18056-18069]	A2ASS6 1xCarbamidomethyl [C18063]	Titin OS=Mus musculus OX=10090 GN=Ttn PE=1 SV=1	1	2581.42	1.464	0.335	1.964	0.293	0.195	0.504	0.531839	0.251353	0.525017	0.0319643	0.0251276	0.693646	0.996109	0.968712	0.999526	0.360897	0.414548	0.995093	2081.8	476.5	2793.5	417.4	277.1	1422.4	716.8	50.81	12.41	24.91	7.82	1.65		19.03	998.8	868.5	461.6
High	[R].ALPQEAAIETTAISSSMVIKNCQR.[S]	1xCarbamidomethyl [C22]; 1xTMTpro [K20]; 1xTMTpro [N-Term]	3.25549e-13	2.82963e-05	1	1	1	1	A2ASS6	A2ASS6 [18353-18376]	A2ASS6 1xCarbamidomethyl [C18374]	Titin OS=Mus musculus OX=10090 GN=Ttn PE=1 SV=1	1	3226.74	1.527	0.483	5.216	0.279	0.306	1.216	0.308687	0.585874	0.162958	0.0784658	0.159214	0.555883	0.978002	0.999952	0.877855	0.580654	0.856782	0.995093	1325.7	418.9	4526.7	241.8	265.7	867.9	1055.1	30.63	1.33	1.89	8.39	0.11		7.08	544.2	646.4	368.1
High	[K].RSDSGKYCVVVENSTGSR.[K]	1xCarbamidomethyl [C8]; 1xTMTpro [K6]; 1xTMTpro [N-Term]	1.28227e-07	2.82963e-05	1	1	1	1	A2ASS6	A2ASS6 [18672-18689]	A2ASS6 1xCarbamidomethyl [C18679]	Titin OS=Mus musculus OX=10090 GN=Ttn PE=1 SV=1	2	2609.36	0.412	0.399	6.596	0.173	0.09	0.216	0.33992	0.22867	0.0206127	0.00173139	6.17349e-05	0.135296	0.987965	0.958782	0.439656	0.0487207	0.00850381	0.909669	154.3	149.7	2471.6	64.8	33.7	374.7	81	54.01	15.1	7.95	8.17	9.94		13.96	76	62.7	147.8
High	[R].SDSGKYCVVVENSTGSR.[K]	1xCarbamidomethyl [C7]; 1xTMTpro [K5]; 1xTMTpro [N-Term]	4.02379e-12	2.82963e-05	1	1	1	3	A2ASS6	A2ASS6 [18673-18689]	A2ASS6 1xCarbamidomethyl [C18679]	Titin OS=Mus musculus OX=10090 GN=Ttn PE=1 SV=1	1	2453.26	0.659	0.265	4.248	0.07	0.092	0.204	0.755409	0.202552	0.312543	3.50666e-06	0.000634723	0.131285	0.999984	0.94858	0.98074	0.000399239	0.0426058	0.906271	1041.4	418.5	6713.4	110.7	145.7	1580.2	322.5	60.46	13.5	16.22	46.15	5.21		15.21	541.7	400.7	408.5
High	[K].YCVVVENSTGSR.[K]	1xCarbamidomethyl [C2]; 1xTMTpro [N-Term]	1.99219e-07	2.82963e-05	1	1	1	2	A2ASS6	A2ASS6 [18678-18689]	A2ASS6 1xCarbamidomethyl [C18679]	Titin OS=Mus musculus OX=10090 GN=Ttn PE=1 SV=1	0	1674.84	0.761	0.326	4.611	0.295	0.195	0.332	0.990371	0.312105	0.217145	0.080069	0.0375426	0.423402	0.999984	0.989613	0.92595	0.585525	0.496154	0.994122	716.4	307.4	4342.7	277.6	183.9	941.9	312.5	39.4	4.42	5.85	44.25	5.71		8.93	314.2	327	281.3
High	[R].VPDLLEGCQYEFR.[V]	1xCarbamidomethyl [C8]; 1xTMTpro [N-Term]	3.7355e-05	2.82963e-05	1	1	1	1	A2ASS6	A2ASS6 [18862-18874]	A2ASS6 1xCarbamidomethyl [C18869]	Titin OS=Mus musculus OX=10090 GN=Ttn PE=1 SV=1	0	1929.97	2.279	0.297	3.578	0.278	0.514	0.814	0.0789838	0.0340263	0.00559222	0.0458716	0.390514	0.70331	0.691878	0.707764	0.239438	0.441168	0.993437	0.995093	199.3	26	313	24.3	44.9	87.5	71.2	53.42	18.46	2.63	4.9	24.93		9.92	97.7	81.4	26.3
High	[K].YRVPDLLEGCQYEFR.[V]	1xCarbamidomethyl [C10]; 1xTMTpro [N-Term]	7.04211e-09	2.82963e-05	1	1	1	2	A2ASS6	A2ASS6 [18860-18874]	A2ASS6 1xCarbamidomethyl [C18869]	Titin OS=Mus musculus OX=10090 GN=Ttn PE=1 SV=1	1	2249.13	1.028	0.634	3.6	0.583	0.491	0.601	0.647921	0.684094	0.2976	0.391757	0.36167	0.901817	0.996109	0.999952	0.970254	0.981245	0.989798	0.998093	1113.6	686.4	3899.8	631.4	532.1	1083.4	651	37.3	1.26	1.8	6.6	4.78		2.26	480.6	516.5	614.3
High	[R].ANHTPESCPETK.[Y]	1xCarbamidomethyl [C8]; 1xTMTpro [K12]; 1xTMTpro [N-Term]	7.7438e-05	2.82963e-05	1	1	1	1	A2ASS6	A2ASS6 [18951-18962]	A2ASS6 1xCarbamidomethyl [C18958]	Titin OS=Mus musculus OX=10090 GN=Ttn PE=1 SV=1	0	1979.01	2.939	0.207	2.688	0.07	0.084	0.633	0.18124	0.124671	0.185092	1.72798e-05	0.00191765	0.979871	0.895702	0.883468	0.899936	0.00142029	0.0936161	0.999948	2200.9	155.2	2013	52.2	63.1	748.8	473.9	63.73	20.49	15.43		57.06		23.01	1178.1	823	159.3
High	[K].NLDCVVTGLQQGK.[T]	1xCarbamidomethyl [C4]; 1xTMTpro [K13]; 1xTMTpro [N-Term]	2.05872e-10	2.82963e-05	1	1	1	2	A2ASS6	A2ASS6 [19253-19265]	A2ASS6 1xCarbamidomethyl [C19256]	Titin OS=Mus musculus OX=10090 GN=Ttn PE=1 SV=1	0	2040.14	1.982	0.255	2.562	0.179	0.275	0.376	0.506222	0.163986	0.548351	0.00413758	0.0614436	0.495956	0.996109	0.918091	0.999526	0.0932575	0.612295	0.994122	2892.5	371.7	3738.2	260.9	400.7	1459.2	549.2	55.49	4.37	20.65	25.99	1.12		7.23	1442.3	1161.1	319.7
High	[K].AENIIGLGLPDTTIPIECQEK.[L]	1xCarbamidomethyl [C18]; 1xTMTpro [K21]; 1xTMTpro [N-Term]	1.23448e-07	2.82963e-05	1	1	1	3	A2ASS6	A2ASS6 [19273-19293]	A2ASS6 1xCarbamidomethyl [C19290]	Titin OS=Mus musculus OX=10090 GN=Ttn PE=1 SV=1	0	2919.6	1.835	0.404	1.94	0.242	0.418	1.402	0.628811	0.318794	0.743076	0.0226134	0.199636	0.563831	0.996109	0.989785	0.999996	0.294148	0.913814	0.995093	3136.3	690.4	3316.7	413.4	713.8	1709.5	2396.7	55.16	6.26	16.47	0.29	10.01		2.49	1559.6	1262.4	640.2
High	[K].GCEYVFR.[V]	1xCarbamidomethyl [C2]; 1xTMTpro [N-Term]	0.0147224	0.000968446	1	1	1	1	A2ASS6	A2ASS6 [19460-19466]	A2ASS6 1xCarbamidomethyl [C19461]	Titin OS=Mus musculus OX=10090 GN=Ttn PE=1 SV=1	0	1234.62	2.141	0.133	5.683	0.051	0.038	0.147	0.0788569	0.00410053	0.00939399	6.22669e-08	3.72796e-09	0.0650918	0.691878	0.347904	0.304501	1.68592e-05	5.71976e-06	0.773707	845.8	52.4	2244.7	20.2	14.9	395	58	48.39	5.3	6.97		9.48		29.12	398	359.8	44.8
High	[K].LKVPHLQKGCEYVFR.[V]	1xCarbamidomethyl [C10]; 2xTMTpro [K2; K8]; 1xTMTpro [N-Term]	0.0168661	0.00109426	1	1	1	2	A2ASS6	A2ASS6 [19452-19466]	A2ASS6 1xCarbamidomethyl [C19461]	Titin OS=Mus musculus OX=10090 GN=Ttn PE=1 SV=1	2	2786.63	1.747	1.3	3.576	0.402	0.542	0.396	0.659412	0.826389	0.426676	0.0705137	0.314626	0.457551	0.996109	0.999952	0.999091	0.551796	0.98292	0.994122	3065	2281.7	6275.2	705.5	950.7	1754.9	695.6	36.08	2.73	10.46	1.1	5.27		2.06	1310.6	1434.7	1985.3
High	[K].DILHPPEVELDVTCR.[D]	1xCarbamidomethyl [C14]; 1xTMTpro [N-Term]	6.2259e-07	2.82963e-05	1	1	1	3	A2ASS6	A2ASS6 [19690-19704]	A2ASS6 1xCarbamidomethyl [C19703]	Titin OS=Mus musculus OX=10090 GN=Ttn PE=1 SV=1	0	2097.1	1.587	0.864	2.707	0.649	0.696	0.854	0.23311	0.802634	0.0624591	0.606767	0.833782	0.735079	0.945895	0.999952	0.677196	1	0.99991	0.995093	713	388.2	1216.3	291.6	312.7	449.4	383.7	44.38	2.61	3.48	1.15	1.1		3.19	325	313.1	338.1
High	[K].DILHPPEVELDVTCRDVITVR.[V]	1xCarbamidomethyl [C14]; 1xTMTpro [N-Term]	3.5457e-06	2.82963e-05	1	1	1	3	A2ASS6	A2ASS6 [19690-19710]	A2ASS6 1xCarbamidomethyl [C19703]	Titin OS=Mus musculus OX=10090 GN=Ttn PE=1 SV=1	1	2780.49	1.442	0.651	4.319	0.556	0.379	0.476	0.310044	0.700641	0.01536	0.456018	0.214945	0.663591	0.97918	0.999952	0.380691	1	0.92688	0.995093	533.2	240.8	1596.7	205.4	140.1	369.7	176.1	45.34	1.61	2.77	10.77	4.08		13.71	244.9	232.4	211.2
High	[K].NSSGHAQGSAIVNVLDRPGPCQNLK.[V]	1xCarbamidomethyl [C21]; 1xTMTpro [K25]; 1xTMTpro [N-Term]	3.1717e-09	2.82963e-05	1	1	1	1	A2ASS6	A2ASS6 [19774-19798]	A2ASS6 1xCarbamidomethyl [C19794]	Titin OS=Mus musculus OX=10090 GN=Ttn PE=1 SV=1	1	3227.72	0.665	0.158	2.713	0.062	0.045	0.168	0.688678	0.0510606	0.582239	8.09294e-06	9.53492e-07	0.129822	0.998376	0.755408	0.999526	0.000766925	0.000353121	0.904987	1164.1	276.9	4745.8	108.2	78.8	1749.5	293.5	75.04	8.9	24.15		16.5		23.28	692.5	391.7	261.6
High	[K].ENCTISWENPLDNGGSEITNFIVEYR.[K]	1xCarbamidomethyl [C3]; 1xTMTpro [N-Term]	3.2229e-10	2.82963e-05	1	1	1	2	A2ASS6	A2ASS6 [19805-19830]	A2ASS6 1xCarbamidomethyl [C19807]	Titin OS=Mus musculus OX=10090 GN=Ttn PE=1 SV=1	0	3361.6	0.817	0.741	3.603	0.467	0.498	1.036	0.903419	0.681316	0.0227921	0.261017	0.314255	0.624816	0.999984	0.999952	0.460415	0.908336	0.982801	0.995093	222.6	201.8	981.6	127.2	135.6	272.4	282.3	43.02	2.06	2.35	2.84	2.56		12.37	100.4	98.8	181.6
High	[R].VCAENK.[V]	1xCarbamidomethyl [C2]; 1xTMTpro [K6]; 1xTMTpro [N-Term]	0.0220875	0.00147441	1	1	1	1	A2ASS6	A2ASS6 [19863-19868]	A2ASS6 1xCarbamidomethyl [C19864]	Titin OS=Mus musculus OX=10090 GN=Ttn PE=1 SV=1	0	1328.75	1.379	0.087	2.443	0.042	0.036	0.13	0.530135	0.00571957	0.356589	6.22871e-07	3.22464e-05	0.039914	0.996109	0.407709	0.989327	0.000103984	0.0053281	0.662384	1491.1	93.6	2642.4	45.8	38.7	1081.5	140.8	68.95	18.27	28.78		14.92		31.88	836.9	531.8	94.5
High	[K].ETHYMVDKCVENQIYEFR.[V]	1xCarbamidomethyl [C9]; 1xTMTpro [K8]; 1xTMTpro [N-Term]	2.44974e-09	2.82963e-05	1	1	1	2	A2ASS6	A2ASS6 [19946-19963]	A2ASS6 1xCarbamidomethyl [C19954]	Titin OS=Mus musculus OX=10090 GN=Ttn PE=1 SV=1	1	2969.48	1.155	0.553	3.93	0.365	0.262	0.828	0.518401	0.693208	0.174347	0.16953	0.116203	0.752067	0.996109	0.999952	0.888363	0.799606	0.773776	0.995093	940.1	449.9	3198	296.7	213.1	813.7	673.9	42.39	9.51	8.98	5.16	9.89		2.09	421.9	419.3	426.9
High	[R].WDPPEDDGGCEIQNYILEK.[C]	1xCarbamidomethyl [C10]; 1xTMTpro [K19]; 1xTMTpro [N-Term]	0.000375207	2.82963e-05	1	1	1	1	A2ASS6	A2ASS6 [20106-20124]	A2ASS6 1xCarbamidomethyl [C20115]	Titin OS=Mus musculus OX=10090 GN=Ttn PE=1 SV=1	0	2886.41	1.086	0.652	2.001	0.395	0.716	0.793	0.470903	0.724291	0.148782	0.228782	0.846035	0.796034	0.996109	0.999952	0.858818	0.877125	0.99991	0.997925	511	306.8	941.4	185.8	337	470.5	373.3	40.04	1.26	8.12	1.77	9.43		2.44	225.2	232.1	269.7
High	[R].CNAAAQLIR.[M]	1xCarbamidomethyl [C1]; 1xTMTpro [N-Term]	3.13679e-05	2.82963e-05	1	1	1	1	A2ASS6	A2ASS6 [20340-20348]	A2ASS6 1xCarbamidomethyl [C20340]	Titin OS=Mus musculus OX=10090 GN=Ttn PE=1 SV=1	0	1320.74	1.394	0.498	2.919	0.157	0.139	0.214	0.470854	0.563013	0.271787	0.00734275	0.00681229	0.139988	0.996109	0.999952	0.959214	0.137853	0.198267	0.913116	1309.3	467.8	2741.9	147.5	130.6	939.4	201.2	74.88	3.93	9.96	12.01	6.59		25.66	777.6	441.3	403.6
High	[K].IADASPDEGWKRCNAAAQLIR.[M]	1xCarbamidomethyl [C13]; 1xTMTpro [K11]; 1xTMTpro [N-Term]	2.55978e-07	2.82963e-05	1	1	1	1	A2ASS6	A2ASS6 [20328-20348]	A2ASS6 1xCarbamidomethyl [C20340]	Titin OS=Mus musculus OX=10090 GN=Ttn PE=1 SV=1	2	2950.58	1.707	0.419	2.49	0.341	0.323	0.555	0.241261	0.3299	0.0957939	0.128762	0.177089	0.910069	0.949643	0.989785	0.766294	0.72064	0.887582	0.998563	952	233.5	1388.6	190.1	179.9	557.8	309.8	42.11	3.24	9.89	4.03	4.82		5.09	426.3	425.5	202.4
High	[K].RCNAAAQLIR.[M]	1xCarbamidomethyl [C2]; 1xTMTpro [N-Term]	2.75951e-06	2.82963e-05	1	1	1	1	A2ASS6	A2ASS6 [20339-20348]	A2ASS6 1xCarbamidomethyl [C20340]	Titin OS=Mus musculus OX=10090 GN=Ttn PE=1 SV=1	1	1476.84	1.155	0.546	4.616	0.254	0.267	0.807	0.450042	0.331256	0.00885808	0.00654206	0.0332746	0.862764	0.996109	0.989785	0.297609	0.12742	0.475142	0.998045	286.1	135.4	1144	63	66.1	247.9	200.1	34.16	2.04	2.21	0.3	2.96		15.83	120.6	135.9	118.4
High	[R].VCAQNQVGIGR.[P]	1xCarbamidomethyl [C2]; 1xTMTpro [N-Term]	3.11874e-07	2.82963e-05	1	1	1	1	A2ASS6	A2ASS6 [20366-20376]	A2ASS6 1xCarbamidomethyl [C20367]	Titin OS=Mus musculus OX=10090 GN=Ttn PE=1 SV=1	0	1505.82	2.162	0.068	2.929	0.042	0.044	0.09	0.184045	0.00496387	0.227224	2.94013e-05	4.70777e-05	0.023654	0.899017	0.381709	0.933718	0.00214075	0.00680199	0.519164	1800.5	56.5	2439.3	35.3	36.4	832.8	74.9	61.53	8.17	14.23		11.09			945.3	686.4	53.1
High	[R].VCAQNQVGIGRPAELK.[E]	1xCarbamidomethyl [C2]; 1xTMTpro [K16]; 1xTMTpro [N-Term]	7.54042e-09	2.82963e-05	1	1	1	1	A2ASS6	A2ASS6 [20366-20381]	A2ASS6 1xCarbamidomethyl [C20367]	Titin OS=Mus musculus OX=10090 GN=Ttn PE=1 SV=1	1	2348.34	0.909	0.228	3.679	0.056	0.035	0.181	0.825886	0.133253	0.290254	1.42527e-05	2.66161e-05	0.125807	0.999984	0.891901	0.96844	0.00119902	0.00458594	0.899706	958.5	239.9	3879.9	59.2	36.8	1054.5	191	61.72	16.44	18.2		0.31		30.34	504.1	364.8	239.2
High	[R].AGCPIRLFAIVR.[G]	1xCarbamidomethyl [C3]; 1xTMTpro [N-Term]	0.000160482	2.82963e-05	1	1	1	1	A2ASS6	A2ASS6 [20409-20420]	A2ASS6 1xCarbamidomethyl [C20411]	Titin OS=Mus musculus OX=10090 GN=Ttn PE=1 SV=1	1	1677	2.79	0.816	3.944	0.506	0.472	1.342	0.0547201	0.820601	0.0111673	0.372787	0.315605	0.441272	0.593174	0.999952	0.326507	0.971935	0.983061	0.994122	509.7	149	720.6	92.4	86.3	182.7	245.2	33.09	1.61	5.5	8.19	11.57		1.96	213.1	244	133.7
High	[R].STEYPCAGLVEGLEYSFR.[I]	1xCarbamidomethyl [C6]; 1xTMTpro [N-Term]	5.24504e-11	2.82963e-05	1	1	1	3	A2ASS6	A2ASS6 [20937-20954]	A2ASS6 1xCarbamidomethyl [C20942]	Titin OS=Mus musculus OX=10090 GN=Ttn PE=1 SV=1	0	2382.16	2.489	0.346	4.51	0.082	0.14	0.541	0.291556	0.346892	0.267397	8.79257e-05	0.00365291	0.872905	0.973801	0.993373	0.956371	0.00500524	0.136698	0.998045	2964.3	412.1	5371.3	97.2	166.5	1190.9	644.5	50.6	1.81	6.81	52.23	15.93		6.56	1419.9	1238.7	360.9
High	[K].AGTNVCLDATVFGK.[P]	1xCarbamidomethyl [C6]; 1xTMTpro [K14]; 1xTMTpro [N-Term]	3.19851e-10	2.82963e-05	1	1	1	1	A2ASS6	A2ASS6 [21098-21111]	A2ASS6 1xCarbamidomethyl [C21103]	Titin OS=Mus musculus OX=10090 GN=Ttn PE=1 SV=1	0	2061.13	1.999	0.308	3.048	0.181	0.295	0.888	0.354613	0.213328	0.289275	0.00718618	0.134994	0.71497	0.992244	0.952827	0.96844	0.135561	0.812542	0.995093	2151	330.9	3279.1	195	317.4	1075.9	955.5	41.51	0.29	11.78	3.33	14.68		12.23	958.8	965.9	292.9
High	[R].NLCTLELFSVNR.[K]	1xCarbamidomethyl [C3]; 1xTMTpro [N-Term]	2.54249e-08	2.82963e-05	1	1	1	1	A2ASS6	A2ASS6 [21138-21149]	A2ASS6 1xCarbamidomethyl [C21140]	Titin OS=Mus musculus OX=10090 GN=Ttn PE=1 SV=1	0	1769.95	1.912	0.414	3.485	0.322	0.442	0.883	0.394568	0.395675	0.273419	0.063056	0.284832	0.731382	0.996089	0.999596	0.960029	0.523154	0.973403	0.995093	1910.1	413.9	3481.7	321.3	441.5	998.9	881.9	42.8	3.37	0.85	2.74	4.96		4.71	860	849.2	358.5
High	[R].NLCTLELFSVNRK.[D]	1xCarbamidomethyl [C3]; 1xTMTpro [K13]; 1xTMTpro [N-Term]	1.04448e-07	2.82963e-05	1	1	1	1	A2ASS6	A2ASS6 [21138-21150]	A2ASS6 1xCarbamidomethyl [C21140]	Titin OS=Mus musculus OX=10090 GN=Ttn PE=1 SV=1	1	2202.26	1.242	0.565	3.56	0.261	0.346	0.543	0.733965	0.654443	0.398765	0.0118637	0.124985	0.74203	0.999984	0.999952	0.994179	0.193106	0.792171	0.995093	1793.9	816.1	5143.7	377.2	500.2	1444.9	784.7	40.56	4.01	6.91	16.39	4.87		2.27	793.8	811.5	703.7
High	[K].RNLCTLELFSVNR.[K]	1xCarbamidomethyl [C4]; 1xTMTpro [N-Term]	4.32358e-07	2.82963e-05	1	1	1	1	A2ASS6	A2ASS6 [21137-21149]	A2ASS6 1xCarbamidomethyl [C21140]	Titin OS=Mus musculus OX=10090 GN=Ttn PE=1 SV=1	1	1926.06	1.675	0.758	2.194	0.742	0.768	0.786	0.374445	0.940141	0.23055	0.693524	0.757911	0.905524	0.994868	0.999952	0.934829	1	0.99991	0.998552	1601.4	724.6	2097.6	709.1	733.9	956.1	751.7	20.94	2.4	1.62	0.57	7.75		2.91	612.4	838.2	631.9
High	[R].ETSRPNWAQVSATVPITSCTVEK.[L]	1xCarbamidomethyl [C19]; 1xTMTpro [K23]; 1xTMTpro [N-Term]	4.08204e-11	2.82963e-05	1	1	1	4	A2ASS6	A2ASS6 [21218-21240]	A2ASS6 1xCarbamidomethyl [C21236]	Titin OS=Mus musculus OX=10090 GN=Ttn PE=1 SV=1	1	3169.68	0.823	0.371	3.598	0.169	0.186	0.389	0.738894	0.293343	0.424336	0.00307685	0.00547268	0.448687	0.999984	0.981709	0.999091	0.0747069	0.173916	0.994122	1928.3	870.9	8434	395	434.9	2344.3	912.4	50.19	5.51	13.1	24.51	4.11		12.73	920.6	808.5	803.2
High	[R].ICAENK.[Y]	1xCarbamidomethyl [C2]; 1xTMTpro [K6]; 1xTMTpro [N-Term]	0.030287	0.00213783	1	1	1	2	A2ASS6	A2ASS6 [21251-21256]	A2ASS6 1xCarbamidomethyl [C21252]	Titin OS=Mus musculus OX=10090 GN=Ttn PE=1 SV=1	0	1342.76	0.949	0.106	2.701	0.036	0.042	0.13	0.755628	0.0294002	0.682946	8.41071e-08	8.78788e-06	0.0776581	0.999984	0.679538	0.999996	2.1251e-05	0.00195273	0.805728	2872.5	320.5	8178.1	107.6	127.4	3027.7	393.6	62.3	9.52	25.05	34.91	8.01		16.02	1518.4	1087.7	304.1
High	[K].IGYSDPSDVPDKHCPK.[D]	1xCarbamidomethyl [C14]; 2xTMTpro [K12; K16]; 1xTMTpro [N-Term]	9.87336e-05	2.82963e-05	1	1	1	1	A2ASS6	A2ASS6 [21459-21474]	A2ASS6 1xCarbamidomethyl [C21472]	Titin OS=Mus musculus OX=10090 GN=Ttn PE=1 SV=1	1	2727.46	2.149	0.275	1.602	0.263	0.339	0.518	0.291137	0.194715	0.362948	0.0582655	0.158749	0.786717	0.973728	0.94285	0.989327	0.500617	0.855881	0.99723	2073.7	265.9	1546.3	254.3	327.4	965	499.6	52.69	7.22	24.57	9.82	13.16		2.68	1010.4	851.9	248.2
High	[R].CENVNKYDAGK.[Y]	1xCarbamidomethyl [C1]; 2xTMTpro [K6; K11]; 1xTMTpro [N-Term]	0.00262132	0.000117823	1	1	1	1	A2ASS6	A2ASS6 [21542-21552]	A2ASS6 1xCarbamidomethyl [C21542]	Titin OS=Mus musculus OX=10090 GN=Ttn PE=1 SV=1	1	2210.21	1.393	0.287	1.561	0.179	0.209	0.4	0.243989	0.105407	0.234148	0.0124742	0.0349732	0.60895	0.951038	0.859302	0.938924	0.200059	0.483413	0.995093	645.8	132.9	723.8	82.8	97	463.7	185.3	62.55	13.85	31.16	6.13	10.75		1.73	342.1	244	130.1
High	[K].YILTLENSCGK.[K]	1xCarbamidomethyl [C9]; 1xTMTpro [K11]; 1xTMTpro [N-Term]	1.28227e-07	2.82963e-05	1	1	1	1	A2ASS6	A2ASS6 [21553-21563]	A2ASS6 1xCarbamidomethyl [C21561]	Titin OS=Mus musculus OX=10090 GN=Ttn PE=1 SV=1	0	1906.06	1.026	0.347	2.626	0.276	0.315	0.879	0.81299	0.314689	0.476956	0.0550899	0.118482	0.837478	0.999984	0.989613	0.999091	0.486139	0.777812	0.997925	1291.1	437.1	3305.6	347.9	396.6	1258.8	1106.7	29.68	1.67	11.91	1.8	2.67		9.76	526.3	634	392.3
High	[K].SWSTVTTECSK.[T]	1xCarbamidomethyl [C9]; 1xTMTpro [K11]; 1xTMTpro [N-Term]	1.81861e-07	2.82963e-05	1	1	1	2	A2ASS6	A2ASS6 [21621-21631]	A2ASS6 1xCarbamidomethyl [C21629]	Titin OS=Mus musculus OX=10090 GN=Ttn PE=1 SV=1	0	1893.99	0.847	0.234	3.334	0.082	0.133	0.231	0.893603	0.137509	0.449001	0.000229765	0.00329301	0.148383	0.999984	0.894481	0.999091	0.0105959	0.129823	0.921175	1487	411.8	5856.5	144.5	233.8	1756.4	405.7	68.45	7.05	16.08	48.97	3.02		22.39	830.7	532.8	384
High	[K].SWSTVTTECSKTSFR.[V]	1xCarbamidomethyl [C9]; 1xTMTpro [K11]; 1xTMTpro [N-Term]	1.22514e-07	2.82963e-05	1	1	1	2	A2ASS6	A2ASS6 [21621-21635]	A2ASS6 1xCarbamidomethyl [C21629]	Titin OS=Mus musculus OX=10090 GN=Ttn PE=1 SV=1	1	2385.24	0.92	0.48	1.823	0.793	0.716	0.474	0.677879	0.320692	0.925365	0.447764	0.291955	0.599633	0.996807	0.989785	0.999996	0.998197	0.976821	0.995093	2963.7	1545.6	5874.8	2556.4	2307.2	3222.8	1529	34.21	4.81	3.9	0.6	11.81		0.23	1249.6	1407	1418.5
High	[K].SSCTIGWK.[K]	1xCarbamidomethyl [C3]; 1xTMTpro [K8]; 1xTMTpro [N-Term]	0.000862202	5.93436e-05	1	1	1	1	A2ASS6	A2ASS6 [21687-21694]	A2ASS6 1xCarbamidomethyl [C21689]	Titin OS=Mus musculus OX=10090 GN=Ttn PE=1 SV=1	0	1546.85	1.661	0.296	2.927	0.248	0.3	0.599	0.702977	0.225483	0.548455	0.0144159	0.082513	0.731968	0.999058	0.957829	0.999526	0.220446	0.684732	0.995093	3020.5	538.2	5322.4	451.2	545.9	1818.5	1089.5	51.24	1.38	14.2	9.92	0.74		12.36	1454.3	1255.7	472.8
High	[K].DDVVAPDLDLKDLPDLCYLAK.[E]	1xCarbamidomethyl [C17]; 2xTMTpro [K11; K21]; 1xTMTpro [N-Term]	0.00989569	0.000605469	1	1	1	1	A2ASS6	A2ASS6 [21764-21784]	A2ASS6 1xCarbamidomethyl [C21780]	Titin OS=Mus musculus OX=10090 GN=Ttn PE=1 SV=1	1	3300.82	1.465	1.073	1.293	0.531	0.744	1.408	0.255969	0.82948	0.42251	0.428654	0.760995	0.44152	0.96173	0.999952	0.999091	0.991746	0.99991	0.994122	360.2	263.8	318	130.6	183	245.9	346.3	34.93	1.86	4.06	2.79	4.99		1.46	152.7	170.1	237.1
High	[K].DLPDLCYLAK.[E]	1xCarbamidomethyl [C6]; 1xTMTpro [K10]; 1xTMTpro [N-Term]	0.0599163	0.00426988	1	1	1	1	A2ASS6	A2ASS6 [21775-21784]	A2ASS6 1xCarbamidomethyl [C21780]	Titin OS=Mus musculus OX=10090 GN=Ttn PE=1 SV=1	0	1816.02	1.442	0.599	1.754	0.545	0.724	0.756	0.233417	0.47683	0.16616	0.513639	0.747289	0.89976	0.945895	0.999596	0.881259	1	0.99991	0.998093	215.4	89.5	262.1	81.5	108.2	149.4	113	36.92	0.95	5.9	3.3	2.22		0.33	92.7	100.2	79.9
High	[K].DLPDLCYLAKENSNFR.[L]	1xCarbamidomethyl [C6]; 1xTMTpro [K10]; 1xTMTpro [N-Term]	2.13315e-07	2.82963e-05	1	1	1	1	A2ASS6	A2ASS6 [21775-21790]	A2ASS6 1xCarbamidomethyl [C21780]	Titin OS=Mus musculus OX=10090 GN=Ttn PE=1 SV=1	1	2563.35	1.312	0.414	2.487	0.528	0.716	0.725	0.546818	0.433022	0.234351	0.388877	0.825936	0.90274	0.996109	0.999596	0.938924	0.97939	0.99991	0.998093	1082.2	341.8	2051.6	435.5	590.4	824.8	598.4	38.54	7.01	3.71	13.93	25.16		3.22	471.5	497.2	288.5
High	[R].VSVESTAVNTTLVVYDCQK.[S]	1xCarbamidomethyl [C17]; 1xTMTpro [K19]; 1xTMTpro [N-Term]	6.05448e-10	2.82963e-05	1	1	1	2	A2ASS6	A2ASS6 [21818-21836]	A2ASS6 1xCarbamidomethyl [C21834]	Titin OS=Mus musculus OX=10090 GN=Ttn PE=1 SV=1	0	2721.46	1.082	0.776	2.243	0.405	0.559	1.433	0.64405	0.973474	0.125593	0.235943	0.602211	0.295001	0.996109	0.999952	0.826325	0.883142	0.99991	0.994122	791.6	567.8	1641.4	296.5	409	731.7	1048.5	38.43	1.97	9.83	0.75	11.26		4.79	344.6	364	510.7
High	[R].DSVNNKWVTCASAVQK.[T]	1xCarbamidomethyl [C10]; 2xTMTpro [K6; K16]; 1xTMTpro [N-Term]	5.99386e-07	2.82963e-05	1	1	1	1	A2ASS6	A2ASS6 [21906-21921]	A2ASS6 1xCarbamidomethyl [C21915]	Titin OS=Mus musculus OX=10090 GN=Ttn PE=1 SV=1	1	2719.5	2.44	0.307	2.937	0.228	0.232	0.582	0.589252	0.212732	0.511827	0.0097066	0.0287844	0.749274	0.996109	0.952827	0.999526	0.168604	0.441727	0.995093	3971.1	499.3	4779.4	371.2	377.6	1627.3	946.4	51.02	10.41	17.51	6.89	0.46		8.91	1908.6	1653.8	476.8
High	[K].WVTCASAVQK.[T]	1xCarbamidomethyl [C4]; 1xTMTpro [K10]; 1xTMTpro [N-Term]	9.45486e-07	2.82963e-05	1	1	1	1	A2ASS6	A2ASS6 [21912-21921]	A2ASS6 1xCarbamidomethyl [C21915]	Titin OS=Mus musculus OX=10090 GN=Ttn PE=1 SV=1	0	1757.99	1.693	0.175	3.875	0.101	0.074	0.192	0.491052	0.0692792	0.308936	0.000490864	0.000709461	0.17498	0.996109	0.804968	0.977984	0.0186505	0.0466001	0.94736	1864.7	192.4	4268.7	110.8	81.5	1101.5	211.2	61.21	8.02	11.03		2.45		21.92	976.3	712.9	180.6
High	[K].DTMATFECETSEPFIK.[V]	1xCarbamidomethyl [C8]; 1xTMTpro [K16]; 1xTMTpro [N-Term]	2.8087e-09	2.82963e-05	1	1	1	2	A2ASS6	A2ASS6 [2195-2210]	A2ASS6 1xCarbamidomethyl [C2202]	Titin OS=Mus musculus OX=10090 GN=Ttn PE=1 SV=1	0	2514.24	1.522	0.204	2.439	0.107	0.144	0.436	0.683868	0.106057	0.588372	0.000213037	0.00861427	0.535812	0.998201	0.859875	0.999526	0.0100646	0.227776	0.994122	2550.2	341.8	4085.8	178.8	241.2	1675.4	730.2	51.35	10.28	15.32	4.46	15.91		10.67	1229	1059.2	326.1
High	[K].EKDTMATFECETSEPFIK.[V]	1xCarbamidomethyl [C10]; 2xTMTpro [K2; K18]; 1xTMTpro [N-Term]	4.14453e-11	2.82963e-05	1	1	1	3	A2ASS6	A2ASS6 [2193-2210]	A2ASS6 1xCarbamidomethyl [C2202]	Titin OS=Mus musculus OX=10090 GN=Ttn PE=1 SV=1	1	3075.58	1.847	0.181	2.475	0.073	0.083	0.354	0.931771	0.0957289	0.772214	3.77276e-06	0.000443375	0.411937	0.999984	0.846428	0.999996	0.000423548	0.0331863	0.994122	6633.4	649.8	8890.4	261.1	299.3	3591.8	1272.9	47.09	12.22	23.9	17.33	16.52		0.17	3089.1	2851.2	628.6
High	[K].ANHVNVPDCAFTVTDLVEGGK.[Y]	1xCarbamidomethyl [C9]; 1xTMTpro [K21]; 1xTMTpro [N-Term]	1.85253e-11	2.82963e-05	1	1	1	2	A2ASS6	A2ASS6 [22112-22132]	A2ASS6 1xCarbamidomethyl [C22120]	Titin OS=Mus musculus OX=10090 GN=Ttn PE=1 SV=1	0	2851.49	2.245	0.291	2.775	0.122	0.137	0.432	0.41386	0.176668	0.457413	0.000610767	0.00334054	0.484795	0.996109	0.929954	0.999091	0.022136	0.130305	0.994122	3021.3	392	3734.8	164.8	184.3	1345.7	581.4	58.66	3.13	6.42	14.23	4.53		13.39	1547.5	1180.7	355.5
High	[K].NTAGAISAPSESTGTIICKDEYEAPTIVLDPTIK.[D]	1xCarbamidomethyl [C18]; 2xTMTpro [K19; K34]; 1xTMTpro [N-Term]	3.09514e-07	2.82963e-05	1	1	1	2	A2ASS6	A2ASS6 [22141-22174]	A2ASS6 1xCarbamidomethyl [C22158]	Titin OS=Mus musculus OX=10090 GN=Ttn PE=1 SV=1	1	4475.4	1.573	0.195	1.449	0.118	0.168	0.397	0.46434	0.10675	0.493119	0.000508918	0.0157517	0.588628	0.996109	0.861579	0.999091	0.0191782	0.321622	0.995093	1738.1	216	1600.7	130.4	185.5	1104.9	439	67.45	14.6	27.14	2.23	8.29		5.75	962.1	628.5	212.5
High	[R].LLWTVVSEDIQACR.[H]	1xCarbamidomethyl [C13]; 1xTMTpro [N-Term]	2.37055e-06	2.82963e-05	1	1	1	2	A2ASS6	A2ASS6 [22306-22319]	A2ASS6 1xCarbamidomethyl [C22318]	Titin OS=Mus musculus OX=10090 GN=Ttn PE=1 SV=1	0	1994.07	2.111	0.604	3.962	0.289	0.429	0.983	0.223588	0.753045	0.195114	0.0798421	0.267592	0.573157	0.941133	0.999952	0.908826	0.585061	0.9645	0.995093	1894.3	542	3554.7	259	385.2	897.1	881.6	36.65	2.94	5.11	1.06	4.6		5.69	813.5	882.9	470.9
High	[R].ANIENTESFTLLIIPECNR.[Y]	1xCarbamidomethyl [C17]; 1xTMTpro [N-Term]	1.23956e-12	2.82963e-05	1	1	1	2	A2ASS6	A2ASS6 [22610-22628]	A2ASS6 1xCarbamidomethyl [C22626]	Titin OS=Mus musculus OX=10090 GN=Ttn PE=1 SV=1	0	2538.32	1.437	0.577	3.621	0.446	0.564	1.428	0.347262	0.760801	0.0487509	0.260692	0.571086	0.319233	0.991317	0.999952	0.625798	0.908336	0.99991	0.994122	826.5	332.1	2082.2	256.3	324.3	575.1	821.2	40.24	3.73	8.45	1.95	10.25		6.92	364.8	374.8	286.9
High	[R].ANIENTESFTLLIIPECNRYDTGK.[F]	1xCarbamidomethyl [C17]; 1xTMTpro [K24]; 1xTMTpro [N-Term]	2.27054e-09	2.82963e-05	1	1	1	2	A2ASS6	A2ASS6 [22610-22633]	A2ASS6 1xCarbamidomethyl [C22626]	Titin OS=Mus musculus OX=10090 GN=Ttn PE=1 SV=1	1	3406.78	1.452	0.587	3.137	0.493	0.431	0.851	0.422304	0.65279	0.270505	0.254815	0.324167	0.704497	0.996109	0.999952	0.957675	0.902876	0.986077	0.995093	1395.9	564.4	3015	473.5	414.1	961.2	818.1	41.32	3	0.05	11.12	4.65		2.67	621.3	627.8	511.4
High	[K].VTGLTEGCEYFFR.[V]	1xCarbamidomethyl [C8]; 1xTMTpro [N-Term]	4.33069e-09	2.82963e-05	1	1	1	3	A2ASS6	A2ASS6 [22717-22729]	A2ASS6 1xCarbamidomethyl [C22724]	Titin OS=Mus musculus OX=10090 GN=Ttn PE=1 SV=1	0	1882.93	1.628	0.497	3.635	0.343	0.239	0.576	0.554952	0.51973	0.380243	0.0649838	0.0704037	0.76931	0.996109	0.999952	0.991802	0.531146	0.647008	0.996886	2491.7	761.4	5564.3	525.4	366.5	1530.9	882.3	48.36	0.18	1.42	34.8	4.97		20.59	1172.2	1060.2	674.5
High	[K].VTGLTEGCEYFFRVMAENEYGVGEPTETTEPVR.[A]	1xCarbamidomethyl [C8]; 1xTMTpro [N-Term]	1.86206e-08	2.82963e-05	1	1	1	1	A2ASS6	A2ASS6 [22717-22749]	A2ASS6 1xCarbamidomethyl [C22724]	Titin OS=Mus musculus OX=10090 GN=Ttn PE=1 SV=1	1	4071.93	1.197	1.154	1.639	0.905	1.25	1.787	0.445951	0.718713	0.215842	0.980777	0.513154	0.235581	0.996109	0.999952	0.92595	1	0.99991	0.984543	288.4	277.9	395	218.1	301.3	240.9	430.5	18.01	2.66	7.39	6.08	0.71		1.2	108	154.2	251.2
High	[K].GLECVVR.[N]	1xCarbamidomethyl [C4]; 1xTMTpro [N-Term]	0.00777866	0.000474396	1	1	1	2	A2ASS6	A2ASS6 [22808-22814]	A2ASS6 1xCarbamidomethyl [C22811]	Titin OS=Mus musculus OX=10090 GN=Ttn PE=1 SV=1	0	1136.64	3.077	0.225	5.022	0.131	0.137	0.286	0.245435	0.135912	0.220273	0.00374629	0.0191384	0.240574	0.952417	0.891901	0.928224	0.0864653	0.360979	0.9871	3264.1	238.2	5327.5	139.1	145.3	1060.9	303.1	54.38	1.77	11.63	5.5	8.77		9.93	1612.7	1322.4	208.7
High	[R].VNVENTATSTILNINECVR.[S]	1xCarbamidomethyl [C17]; 1xTMTpro [N-Term]	8.28047e-12	2.82963e-05	1	1	1	3	A2ASS6	A2ASS6 [22901-22919]	A2ASS6 1xCarbamidomethyl [C22917]	Titin OS=Mus musculus OX=10090 GN=Ttn PE=1 SV=1	0	2451.28	1.345	0.458	4.689	0.213	0.236	0.649	0.698484	0.500711	0.243194	0.0123099	0.067836	0.833674	0.999058	0.999596	0.944973	0.198295	0.636955	0.997925	2064.8	703.2	7201	327	362.1	1535.7	996.7	50.05	5.34	3.43	17.13	2.46		5.6	984.6	866.7	600.6
High	[K].ELQDIEVPESYSGELECIISPENIEGK.[W]	1xCarbamidomethyl [C17]; 1xTMTpro [K27]; 1xTMTpro [N-Term]	7.36446e-08	2.82963e-05	1	1	1	3	A2ASS6	A2ASS6 [2278-2304]	A2ASS6 1xCarbamidomethyl [C2294]	Titin OS=Mus musculus OX=10090 GN=Ttn PE=1 SV=1	0	3685.87	1.901	0.215	3.264	0.095	0.146	0.377	0.741838	0.101006	0.49045	9.43665e-05	0.00850912	0.425783	0.999984	0.855161	0.999091	0.00528781	0.225279	0.994122	3884.3	439	6670.1	194.6	299	2043.4	771.3	51.8	11.18	11.88	31.11	16.33		4.77	1878.8	1607.4	421.5
High	[K].NAAGAISPPSEPSDAITCRDDLEAPR.[I]	1xCarbamidomethyl [C18]; 1xTMTpro [N-Term]	1.01406e-08	2.82963e-05	1	1	1	2	A2ASS6	A2ASS6 [23224-23249]	A2ASS6 1xCarbamidomethyl [C23241]	Titin OS=Mus musculus OX=10090 GN=Ttn PE=1 SV=1	1	3014.48	2.325	0.409	3.119	0.262	0.279	0.884	0.241852	0.444098	0.301756	0.0620139	0.139111	0.670733	0.950016	0.999596	0.972907	0.519119	0.821557	0.995093	2200.5	386.8	2951.4	248.3	263.8	946.4	836.2	64.19	4.23	2.07	1.41	8.83		11.29	1182.7	819.5	353.5
High	[K].DSMVVCWGHPDSDGGSEIINYIVER.[R]	1xCarbamidomethyl [C6]; 1xTMTpro [N-Term]	5.78946e-11	2.82963e-05	1	1	1	2	A2ASS6	A2ASS6 [23458-23482]	A2ASS6 1xCarbamidomethyl [C23463]	Titin OS=Mus musculus OX=10090 GN=Ttn PE=1 SV=1	0	3139.48	1.414	0.303	4.456	0.099	0.137	0.345	0.673371	0.252104	0.268636	3.38484e-05	0.00963931	0.397997	0.996109	0.969433	0.957036	0.00238121	0.242829	0.994122	2363	505.5	7446.1	166	228.3	1671	577	56.26	4.58	1.46	55.9	7.92		2.95	1186	942.4	434.1
High	[K].ACDTVFKPGPPGNPR.[V]	1xCarbamidomethyl [C2]; 1xTMTpro [K7]; 1xTMTpro [N-Term]	4.46064e-08	2.82963e-05	1	1	1	2	A2ASS6	A2ASS6 [23538-23552]	A2ASS6 1xCarbamidomethyl [C23539]	Titin OS=Mus musculus OX=10090 GN=Ttn PE=1 SV=1	1	2221.2	1.494	0.216	3.807	0.135	0.117	0.238	0.393753	0.120312	0.259461	0.00408852	0.00681147	0.248309	0.996089	0.878762	0.95421	0.0923139	0.198267	0.989612	1588.9	229.3	4047.7	143.5	124.2	1063.2	253.3	61.8	2.16	7.62	30.83	0.35		5.79	836.2	604.3	206.5
High	[R].IMAENAAGISAPSATSPFYKACDTVFKPGPPGNPR.[V]	1xCarbamidomethyl [C22]; 2xTMTpro [K20; K27]; 1xTMTpro [N-Term]	3.42765e-11	2.82963e-05	1	1	1	4	A2ASS6	A2ASS6 [23518-23552]	A2ASS6 1xCarbamidomethyl [C23539]	Titin OS=Mus musculus OX=10090 GN=Ttn PE=1 SV=1	2	4532.39	1.727	0.475	2.419	0.402	0.315	0.824	0.97761	0.327794	0.796364	0.128852	0.0790949	0.830039	0.999984	0.989785	0.999996	0.721019	0.673834	0.997925	5133.3	1413	7188.8	1195.2	936.8	2972.1	2448.2	41.89	8.27	16.42	5.54	1.61		8.04	2294.8	2298.4	1329
High	[K].AYSTVATNCHK.[T]	1xCarbamidomethyl [C9]; 1xTMTpro [K11]; 1xTMTpro [N-Term]	0.0993888	0.00628124	1	1	1	1	A2ASS6	A2ASS6 [23786-23796]	A2ASS6 1xCarbamidomethyl [C23794]	Titin OS=Mus musculus OX=10090 GN=Ttn PE=1 SV=1	0	1859.99	0.736	1.45	1.997	0.986	1.289	0.282	0.75746	0.513284	0.132136	0.83686	0.480942	0.320582	0.999984	0.999626	0.83673	1	0.99991	0.994122	136.6	269.1	370.5	182.9	239.2	185.6	52.4	35.36	0.89	1.86	25.27	20.62		22.03	58.1	64.3	240.2
High	[R].KAYSTVATNCHK.[T]	1xCarbamidomethyl [C10]; 2xTMTpro [K1; K12]; 1xTMTpro [N-Term]	2.52325e-08	2.82963e-05	1	1	1	2	A2ASS6	A2ASS6 [23785-23796]	A2ASS6 1xCarbamidomethyl [C23794]	Titin OS=Mus musculus OX=10090 GN=Ttn PE=1 SV=1	1	2292.3	0.523	0.336	4.137	0.194	0.201	0.314	0.486962	0.262695	0.322553	0.00518364	0.0297851	0.291436	0.996109	0.973507	0.982386	0.108382	0.448867	0.994122	1001.6	643.6	7924.6	371.4	385.1	1915.5	600.7	30.48	4.03	7.25	8.13	4.52		6.73	410.7	488.9	587.4
High	[K].TSWKVDQLQEGCSYYFR.[V]	1xCarbamidomethyl [C12]; 1xTMTpro [K4]; 1xTMTpro [N-Term]	0.122925	0.00723456	1	1	1	1	A2ASS6	A2ASS6 [23797-23813]	A2ASS6 1xCarbamidomethyl [C23808]	Titin OS=Mus musculus OX=10090 GN=Ttn PE=1 SV=1	1	2775.41	0.742	1.02	1.34	0.622	1.099	0.72	0.864856	0.991595	0.57629	0.450586	0.906361	0.942902	0.999984	0.999952	0.999526	0.99848	0.999916	0.999948	884.1	1215.4	1597.1	741.4	1309.5	1192	858.8	22.01	3.39	7.25	4.77	12.46		9.38	340.7	459.2	1052.6
High	[K].VDQLQEGCSYYFR.[V]	1xCarbamidomethyl [C8]; 1xTMTpro [N-Term]	9.3353e-10	2.82963e-05	1	1	1	4	A2ASS6	A2ASS6 [23801-23813]	A2ASS6 1xCarbamidomethyl [C23808]	Titin OS=Mus musculus OX=10090 GN=Ttn PE=1 SV=1	0	1968.94	2.213	0.28	3.496	0.079	0.056	0.474	0.806522	0.217377	0.447426	4.60265e-05	2.20131e-06	0.685084	0.999984	0.953581	0.999091	0.00302648	0.000644783	0.995093	5358.6	678.6	8462.9	190.1	136.1	2421	1148.7	60.45	1.6	1.65	27.37	43.75		18.78	2787.1	2062.2	595.2
High	[R].WATCATVK.[V]	1xCarbamidomethyl [C4]; 1xTMTpro [K8]; 1xTMTpro [N-Term]	0.000123046	2.82963e-05	1	1	1	1	A2ASS6	A2ASS6 [23884-23891]	A2ASS6 1xCarbamidomethyl [C23887]	Titin OS=Mus musculus OX=10090 GN=Ttn PE=1 SV=1	0	1544.88	1.633	0.181	2.963	0.284	0.111	1.619	0.495387	0.0867878	0.313281	0.0355557	0.00439068	0.461698	0.996109	0.834999	0.980809	0.385442	0.15318	0.994122	1808.4	199.9	3281.7	314.4	122.8	1107.5	1792.6	61.62	3.17	13.02	3.85	2.87		23.33	950.2	688.9	173.4
High	[K].TGCEYQFR.[I]	1xCarbamidomethyl [C3]; 1xTMTpro [N-Term]	0.000407811	2.82963e-05	1	1	1	1	A2ASS6	A2ASS6 [24096-24103]	A2ASS6 1xCarbamidomethyl [C24098]	Titin OS=Mus musculus OX=10090 GN=Ttn PE=1 SV=1	0	1364.66	2.39	0.119	2.8	0.063	0.072	0.215	0.240738	0.0145054	0.298094	6.98208e-05	0.000503652	0.226924	0.949643	0.5799	0.970254	0.00422009	0.0356652	0.978336	2144.5	107.1	2511.9	56.7	65	897.3	192.5	67.83	1.86	7.37	14.27	18.67		6.62	1191.2	772.8	96.3
High	[K].ACDPIYKPGPPNNPK.[V]	1xCarbamidomethyl [C2]; 2xTMTpro [K7; K15]; 1xTMTpro [N-Term]	7.42062e-08	2.82963e-05	1	1	1	1	A2ASS6	A2ASS6 [24620-24634]	A2ASS6 1xCarbamidomethyl [C24621]	Titin OS=Mus musculus OX=10090 GN=Ttn PE=1 SV=1	1	2580.44	1.144	0.167	2.904	0.06	0.059	0.259	0.667875	0.0600689	0.296715	3.42395e-05	0.000305735	0.271927	0.996109	0.777184	0.970254	0.00240348	0.0251938	0.994122	1203.4	175.4	3054.7	62.7	62.1	1052	272.6	60.75	20	16.14		22.67		11.73	627.6	461.9	179.4
High	[R].ICAINK.[A]	1xCarbamidomethyl [C2]; 1xTMTpro [K6]; 1xTMTpro [N-Term]	0.0338549	0.00232706	1	1	1	1	A2ASS6	A2ASS6 [24702-24707]	A2ASS6 1xCarbamidomethyl [C24703]	Titin OS=Mus musculus OX=10090 GN=Ttn PE=1 SV=1	0	1326.81	0.982	1.087	2.231	0.153	0.151	0.251	0.837067	0.893302	0.459736	0.00171907	0.00600065	0.219029	0.999984	0.999952	0.999091	0.0485013	0.183784	0.973467	1289.8	1427.5	2930.1	201.3	198.3	1313.6	330.1	58.92	20.43	13.72	7.75	0.2		15.54	662.1	502.9	1094.8
High	[K].AVLECKVSVPDVTSVK.[W]	1xCarbamidomethyl [C5]; 2xTMTpro [K6; K16]; 1xTMTpro [N-Term]	3.52471e-08	2.82963e-05	1	1	1	1	A2ASS6	A2ASS6 [2468-2483]	A2ASS6 1xCarbamidomethyl [C2472]	Titin OS=Mus musculus OX=10090 GN=Ttn PE=1 SV=1	1	2643.56	1.951	0.301	2.955	0.152	0.187	0.529	0.747971	0.189527	0.577773	0.00151865	0.0140498	0.700423	0.999984	0.940052	0.999526	0.0443305	0.299504	0.995093	4006	617.1	6067.1	312.5	384.4	2052.9	1086.9	44.79	9.82	20.6	12.02	5.2		2.34	1831.9	1753.5	586.9
High	[K].AVLECK.[VT]	1xCarbamidomethyl [C5]; 1xTMTpro [K6]; 1xTMTpro [N-Term]	0.022244	0.00149987	2	2	1	3	A2ASS6; E9Q555	A2ASS6 [2468-2473]; E9Q555 [4290-4295]	A2ASS6 1xCarbamidomethyl [C2472]; E9Q555 1xCarbamidomethyl [C4294]	Titin OS=Mus musculus OX=10090 GN=Ttn PE=1 SV=1 E3 ubiquitin-protein ligase RNF213 OS=Mus musculus OX=10090 GN=Rnf213 PE=1 SV=3	0	1327.79	1.567	0.138	3.171	0.133	0.172	0.174	0.87617	0.030068	0.530748	0.00133499	0.00605005	0.0992403	0.999984	0.685313	0.999526	0.040237	0.184417	0.851028	3619	318.3	7321.6	306.5	397.4	2309.1	402	55.77	3.91	13.39	21.04	6.77		12.24	1808.9	1449.3	290.3
High	[R].KSYAAVVTNCHK.[N]	1xCarbamidomethyl [C10]; 2xTMTpro [K1; K12]; 1xTMTpro [N-Term]	5.86363e-08	2.82963e-05	1	1	1	1	A2ASS6	A2ASS6 [24867-24878]	A2ASS6 1xCarbamidomethyl [C24876]	Titin OS=Mus musculus OX=10090 GN=Ttn PE=1 SV=1	1	2290.32	0.511	0.25	3.443	0.148	0.182	0.161	0.592836	0.141171	0.231523	0.00638425	0.0277629	0.115077	0.996109	0.897118	0.936386	0.125274	0.435195	0.880902	487	238.6	3284.3	140.7	173.3	953.9	153.6	63.3	11.51	10.65	7.44	6.19		3.56	259.7	182.8	229.6
High	[K].SYAAVVTNCHK.[N]	1xCarbamidomethyl [C9]; 1xTMTpro [K11]; 1xTMTpro [N-Term]	2.56188e-08	2.82963e-05	1	1	1	2	A2ASS6	A2ASS6 [24868-24878]	A2ASS6 1xCarbamidomethyl [C24876]	Titin OS=Mus musculus OX=10090 GN=Ttn PE=1 SV=1	0	1858.01	0.726	0.174	2.915	0.041	0.026	0.124	0.935471	0.0536656	0.0702426	3.19608e-07	9.10723e-08	0.0763377	0.999984	0.758739	0.700664	5.95247e-05	6.82407e-05	0.803537	397.3	95.4	1594.7	22.2	14.1	547	67.8	80.04	26.51	13.48		13.23		45.32	248.6	127.1	102.3
High	[K].IDQLQEGCSYYFR.[V]	1xCarbamidomethyl [C8]; 1xTMTpro [N-Term]	2.23447e-08	2.82963e-05	1	1	1	2	A2ASS6	A2ASS6 [24883-24895]	A2ASS6 1xCarbamidomethyl [C24890]	Titin OS=Mus musculus OX=10090 GN=Ttn PE=1 SV=1	0	1982.96	1.83	0.312	3.681	0.08	0.07	0.411	0.787293	0.210828	0.406546	2.32958e-05	0.000139043	0.433578	0.999984	0.952827	0.996119	0.00178712	0.0149831	0.994122	3822.2	650.8	7687.7	166.4	145.4	2088.7	859.1	66.14	5.7	1.71	53.16	39.56		15.07	2090.7	1398.7	554.5
High	[K].NTDKWSECAR.[V]	1xCarbamidomethyl [C8]; 1xTMTpro [K4]; 1xTMTpro [N-Term]	4.69642e-06	2.82963e-05	1	1	1	1	A2ASS6	A2ASS6 [24962-24971]	A2ASS6 1xCarbamidomethyl [C24969]	Titin OS=Mus musculus OX=10090 GN=Ttn PE=1 SV=1	1	1874.97	2.024	0.113	2.77	0.087	0.061	0.209	0.0857635	0.00239666	0.0518659	9.65925e-05	9.71532e-06	0.156479	0.7183	0.272864	0.6375	0.00538753	0.00210086	0.931363	742	41.3	1015.3	31.8	22.3	366.6	76.6	73.53	12.65	15.08	5.77	21.05		3.18	434.9	253.4	40.1
High	[K].NSECYVAR.[D]	1xCarbamidomethyl [C4]; 1xTMTpro [N-Term]	0.000682215	2.82963e-05	1	1	1	1	A2ASS6	A2ASS6 [25300-25307]	A2ASS6 1xCarbamidomethyl [C25303]	Titin OS=Mus musculus OX=10090 GN=Ttn PE=1 SV=1	0	1302.64	2.144	0.13	2.653	0.063	0.048	0.139	0.119944	0.0254405	0.195064	6.65216e-06	9.54669e-05	0.0884418	0.810367	0.659959	0.908826	0.000653453	0.0116073	0.834269	1640.5	99.6	2030.4	47.9	36.7	765.3	106.6	79.21	11.72	6.55	5.55	14.19		44.16	1017.7	529.3	96
High	[R].DPCDPPGTPEAIIVK.[R]	1xCarbamidomethyl [C3]; 1xTMTpro [K15]; 1xTMTpro [N-Term]	3.06612e-05	2.82963e-05	1	1	1	2	A2ASS6	A2ASS6 [25308-25322]	A2ASS6 1xCarbamidomethyl [C25310]	Titin OS=Mus musculus OX=10090 GN=Ttn PE=1 SV=1	0	2217.21	2.558	0.614	1.994	0.443	0.244	0.702	0.395317	0.735523	0.49694	0.214072	0.0573683	0.973378	0.996089	0.999952	0.999091	0.859339	0.593198	0.999948	3415.9	820	2662.3	591.8	325.3	1335.2	936.7	54.08	5.88	8.11	5.36	20.11		7.35	1683.5	1387.3	758.3
High	[R].VETSCNLSVEK.[I]	1xCarbamidomethyl [C5]; 1xTMTpro [K11]; 1xTMTpro [N-Term]	2.5404e-07	2.82963e-05	1	1	1	1	A2ASS6	A2ASS6 [2528-2538]	A2ASS6 1xCarbamidomethyl [C2532]	Titin OS=Mus musculus OX=10090 GN=Ttn PE=1 SV=1	0	1874.02	1.623	0.085	2.77	0.048	0.046	0.137	0.718625	0.00972255	0.551761	1.34037e-06	1.17251e-05	0.0745587	0.999265	0.505985	0.999526	0.00019025	0.00243399	0.799282	2988.9	157.3	5102.3	88.4	85	1841.8	252.4	60.16	15.89	22.52		14.45			1550.7	1153.1	156.2
High	[K].EIEESARCEIK.[N]	1xCarbamidomethyl [C8]; 1xTMTpro [K11]; 1xTMTpro [N-Term]	0.133908	0.00768882	1	1	1	1	A2ASS6	A2ASS6 [25454-25464]	A2ASS6 1xCarbamidomethyl [C25461]	Titin OS=Mus musculus OX=10090 GN=Ttn PE=1 SV=1	1	1972.07	2.221	0.704	1.72	0.483	0.711	1.961	0.110444	0.802597	0.218261	0.414028	0.867886	0.137998	0.792926	0.999952	0.926737	0.989772	0.999916	0.909669	1043.6	330.8	808.2	226.8	334	469.9	921.6	49.06	1.39	9.16	6.9	5.35		11.93	493.7	441.6	290.6
High	[K].CTLAWSPPLQDGGSDISHYVVEK.[R]	1xCarbamidomethyl [C1]; 1xTMTpro [K23]; 1xTMTpro [N-Term]	5.77046e-07	2.82963e-05	1	1	1	1	A2ASS6	A2ASS6 [25525-25547]	A2ASS6 1xCarbamidomethyl [C25525]	Titin OS=Mus musculus OX=10090 GN=Ttn PE=1 SV=1	0	3167.63	1.537	0.398	2.146	0.287	0.291	0.917	0.279004	0.451206	0.166659	0.0532406	0.173728	0.667075	0.967965	0.999596	0.881259	0.477577	0.883309	0.995093	974.2	252	1360.2	182.1	184.3	633.8	581.2	53.49	2.55	9.34	10.61	4.83		14.76	477.8	397.6	227.6
High	[K].DSMTVCWNRPDSDGGSEIIGYIVEK.[R]	1xCarbamidomethyl [C6]; 1xTMTpro [K25]; 1xTMTpro [N-Term]	2.62309e-09	2.82963e-05	1	1	1	1	A2ASS6	A2ASS6 [25622-25646]	A2ASS6 1xCarbamidomethyl [C25627]	Titin OS=Mus musculus OX=10090 GN=Ttn PE=1 SV=1	1	3436.7	1.871	0.167	3.042	0.07	0.054	0.317	0.77325	0.0588538	0.546012	1.16434e-05	4.45295e-05	0.351707	0.999984	0.775715	0.999526	0.00103347	0.00660271	0.994122	3899.4	347.1	6340.2	146.7	111.5	2084.4	661.6	60.83	4.02	11.53		32.07		0.17	2034.9	1495.7	299.3
High	[K].ACDPVFKPGPPTNAHVVDTTK.[N]	1xCarbamidomethyl [C2]; 2xTMTpro [K7; K21]; 1xTMTpro [N-Term]	5.22783e-07	2.82963e-05	1	1	1	1	A2ASS6	A2ASS6 [25702-25722]	A2ASS6 1xCarbamidomethyl [C25703]	Titin OS=Mus musculus OX=10090 GN=Ttn PE=1 SV=1	1	3163.74	1.872	0.188	2.133	0.095	0.107	0.353	0.386985	0.0864224	0.422605	0.000249738	0.0043938	0.497453	0.996089	0.834999	0.999091	0.011254	0.15318	0.994122	2068.5	207.8	2357.7	104.7	118.7	1105.1	389.7	56.95	8.45	17.6	20.03	15.63		14.95	1044.2	820.2	195.7
High	[R].VCALNK.[V]	1xCarbamidomethyl [C2]; 1xTMTpro [K6]; 1xTMTpro [N-Term]	0.0431282	0.00311056	1	1	1	1	A2ASS6	A2ASS6 [25784-25789]	A2ASS6 1xCarbamidomethyl [C25785]	Titin OS=Mus musculus OX=10090 GN=Ttn PE=1 SV=1	0	1312.79	2.44	0.149	2.966	0.076	0.087	0.225	0.213444	0.0288188	0.326375	2.74878e-06	0.000931709	0.179393	0.929887	0.677404	0.982386	0.000330469	0.0572894	0.949346	2401.1	146.9	2919	75.2	85.2	984.1	221.6	60.54	12.6	14.65	10.85	14.71		16.16	1249.9	923.3	142.5
High	[K].GINFTQLSIDNCDR.[N]	1xCarbamidomethyl [C12]; 1xTMTpro [N-Term]	3.77412e-08	2.82963e-05	1	1	1	1	A2ASS6	A2ASS6 [25863-25876]	A2ASS6 1xCarbamidomethyl [C25874]	Titin OS=Mus musculus OX=10090 GN=Ttn PE=1 SV=1	0	1956.98	1.521	0.513	3.199	0.489	0.493	1.232	0.258082	0.45898	0.0365628	0.263876	0.448471	0.402879	0.962291	0.999596	0.562524	0.91116	0.99991	0.994122	605.1	204	1272.4	194.4	195.9	397.7	490.1	42.51	0.92	9.69	2.08	5.82		1.78	271.8	269.6	179.8
High	[K].GINFTQLSIDNCDRNDAGK.[Y]	1xCarbamidomethyl [C12]; 1xTMTpro [K19]; 1xTMTpro [N-Term]	3.95337e-09	2.82963e-05	1	1	1	2	A2ASS6	A2ASS6 [25863-25881]	A2ASS6 1xCarbamidomethyl [C25874]	Titin OS=Mus musculus OX=10090 GN=Ttn PE=1 SV=1	1	2746.41	1.552	0.215	4.042	0.047	0.057	0.232	0.888224	0.108474	0.33832	1.34306e-07	2.72448e-05	0.184185	0.999984	0.864518	0.984191	3.13575e-05	0.0046693	0.951631	3576.5	495.5	9311.1	108.9	130.5	2303.7	533.4	59.7	4.68	1.06	48.78	18.29		5.63	1848.2	1385.3	425.2
High	[K].VCNAVVSGLSSGQEYQFR.[V]	1xCarbamidomethyl [C2]; 1xTMTpro [N-Term]	1.89679e-12	2.82963e-05	1	1	1	2	A2ASS6	A2ASS6 [26056-26073]	A2ASS6 1xCarbamidomethyl [C26057]	Titin OS=Mus musculus OX=10090 GN=Ttn PE=1 SV=1	0	2305.16	2.212	0.427	3.708	0.214	0.23	3.592	0.311988	0.49357	0.202662	0.0291355	0.0681294	0.1617	0.97918	0.999596	0.918157	0.341487	0.638305	0.93877	2021.7	390.4	3388.9	196	210.3	913.8	3282.7	25.57	3.63	4.98	1.67	0.91		16.62	799.6	1023.2	355.3
High	[K].LTVAGGAISTPLTDQTVAESQEAVFECEVANPESEGEWLK.[D]	1xCarbamidomethyl [C27]; 1xTMTpro [K40]; 1xTMTpro [N-Term]	2.08852e-09	2.82963e-05	1	1	1	1	A2ASS6	A2ASS6 [2621-2660]	A2ASS6 1xCarbamidomethyl [C2647]	Titin OS=Mus musculus OX=10090 GN=Ttn PE=1 SV=1	0	4871.44	2.053	0.261	2.386	0.138	0.277	1.204	0.132059	0.153996	0.108331	0.0022806	0.10734	0.435718	0.831097	0.912243	0.795082	0.0595469	0.755388	0.994122	1099.9	139.6	1278.6	73.9	148.5	535.8	645.3	47	8.88	14.68	18.82	17.58		1.68	511.8	473.1	131.9
High	[K].TTLIVKDCIR.[T]	1xCarbamidomethyl [C8]; 1xTMTpro [K6]; 1xTMTpro [N-Term]	3.1848e-05	2.82963e-05	1	1	1	1	A2ASS6	A2ASS6 [26553-26562]	A2ASS6 1xCarbamidomethyl [C26560]	Titin OS=Mus musculus OX=10090 GN=Ttn PE=1 SV=1	1	1827.1	1.959	0.717	1.532	0.872	0.732	1.253	0.192257	0.892599	0.368681	0.910363	0.862296	0.439446	0.908695	0.999952	0.989389	1	0.999916	0.994122	1382.9	505.8	1081.2	615.1	516.4	705.7	884.4	8.77	1.17	1.42	8.4	6.84		4.53	484.7	789.7	445
High	[K].YGIGEALESEPVIACNPYK.[R]	1xCarbamidomethyl [C15]; 1xTMTpro [K19]; 1xTMTpro [N-Term]	7.84521e-11	2.82963e-05	1	1	1	2	A2ASS6	A2ASS6 [26671-26689]	A2ASS6 1xCarbamidomethyl [C26685]	Titin OS=Mus musculus OX=10090 GN=Ttn PE=1 SV=1	0	2718.43	1.712	0.266	2.374	0.231	0.208	0.823	0.422957	0.174312	0.414852	0.0422865	0.017834	0.936054	0.996109	0.92883	0.999091	0.421426	0.344904	0.9999	2191.1	340.3	3038.8	295.2	266	1279.8	1053.4	62.17	6.01	8.8	0.52	6.86		23.85	1156.8	830.7	315
High	[K].YGIGEALESEPVIACNPYKR.[P]	1xCarbamidomethyl [C15]; 1xTMTpro [K19]; 1xTMTpro [N-Term]	1.49758e-11	2.82963e-05	1	1	1	3	A2ASS6	A2ASS6 [26671-26690]	A2ASS6 1xCarbamidomethyl [C26685]	Titin OS=Mus musculus OX=10090 GN=Ttn PE=1 SV=1	1	2874.53	1.803	0.491	2.764	0.261	0.34	0.66	0.446712	0.507526	0.493221	0.0235228	0.102546	0.898948	0.996109	0.999596	0.999091	0.30016	0.743808	0.998093	2494.2	679.1	3822.9	361.4	470.4	1383.3	913.7	48.83	3.92	7.1	5.25	5.58		2.85	1177.7	1057.3	619.3
High	[R].ACDALYPPGPPSNPK.[V]	1xCarbamidomethyl [C2]; 1xTMTpro [K15]; 1xTMTpro [N-Term]	4.35288e-06	2.82963e-05	1	1	1	2	A2ASS6	A2ASS6 [26785-26799]	A2ASS6 1xCarbamidomethyl [C26786]	Titin OS=Mus musculus OX=10090 GN=Ttn PE=1 SV=1	0	2192.17	1.233	0.496	2.777	0.861	0.385	0.346	0.886252	0.51301	0.561902	0.739525	0.238352	0.371769	0.999984	0.999596	0.999526	1	0.947512	0.994122	2069.6	832	4663.3	1446.1	645.8	1679.1	581.2	52.05	0.85	4.36	0.48	5.86		14.56	1003.1	854.7	742.5
High	[R].VAAENAAGVGEPSEPSVFYRACDALYPPGPPSNPK.[V]	1xCarbamidomethyl [C22]; 1xTMTpro [K35]; 1xTMTpro [N-Term]	1.3341e-09	2.82963e-05	1	1	1	2	A2ASS6	A2ASS6 [26765-26799]	A2ASS6 1xCarbamidomethyl [C26786]	Titin OS=Mus musculus OX=10090 GN=Ttn PE=1 SV=1	1	4223.14	2.34	0.587	3.032	0.426	0.454	2.53	0.0995558	0.64531	0.0216625	0.313937	0.454947	0.0941484	0.76454	0.999952	0.44858	0.943749	0.99991	0.845495	1082.9	271.6	1403.6	197.3	210.2	462.9	1170.9	46.11	4.54	3.38	1	13.39		13.63	500.4	469.1	248.8
High	[K].AAADEWTTCTPPSGLQGK.[Q]	1xCarbamidomethyl [C9]; 1xTMTpro [K18]; 1xTMTpro [N-Term]	4.4643e-09	2.82963e-05	1	1	1	3	A2ASS6	A2ASS6 [26833-26850]	A2ASS6 1xCarbamidomethyl [C26841]	Titin OS=Mus musculus OX=10090 GN=Ttn PE=1 SV=1	0	2498.28	3.148	0.363	3.557	0.186	0.192	0.627	0.468634	0.312994	0.380401	0.00197516	0.0138454	0.835508	0.996109	0.989613	0.991802	0.0531658	0.297071	0.997925	4726.4	545.3	5340.1	278.9	287.6	1501.3	941.7	52.15	0.22	3.53	25.81	3.51		12.43	2292.6	1950.4	483
High	[K].KAAADEWTTCTPPSGLQGK.[Q]	1xCarbamidomethyl [C10]; 2xTMTpro [K1; K19]; 1xTMTpro [N-Term]	5.92292e-11	2.82963e-05	1	1	1	1	A2ASS6	A2ASS6 [26832-26850]	A2ASS6 1xCarbamidomethyl [C26841]	Titin OS=Mus musculus OX=10090 GN=Ttn PE=1 SV=1	1	2930.59	1.623	0.355	3.405	0.155	0.118	0.557	0.28302	0.245649	0.058078	0.0116609	0.00467077	0.862492	0.969158	0.967205	0.664043	0.190717	0.159279	0.998045	954.2	208.5	2002	90.9	69.6	587.9	327.2	44.48	6.64	12.32	10.49	18.81		20.25	435.3	418.7	193.9
High	[K].ENTEYNFRICAFNTEGVGEPATIPGSVVAQER.[M]	1xCarbamidomethyl [C10]; 1xTMTpro [N-Term]	3.76715e-15	2.82963e-05	1	1	1	2	A2ASS6	A2ASS6 [26859-26890]	A2ASS6 1xCarbamidomethyl [C26868]	Titin OS=Mus musculus OX=10090 GN=Ttn PE=1 SV=1	1	3859.89	3.547	0.54	4.023	0.29	0.269	1.213	0.0283229	0.574374	0.0190396	0.0827264	0.0616339	0.351399	0.434347	0.999952	0.423524	0.594965	0.612452	0.994122	1519.6	231.1	1723.5	124.4	115.4	428.4	519.6	50.03	0.57	7.06	1.59	15.11		6.26	724.5	638	204.2
High	[R].ICAFNTEGVGEPATIPGSVVAQER.[M]	1xCarbamidomethyl [C2]; 1xTMTpro [N-Term]	7.84521e-11	2.82963e-05	1	1	1	2	A2ASS6	A2ASS6 [26867-26890]	A2ASS6 1xCarbamidomethyl [C26868]	Titin OS=Mus musculus OX=10090 GN=Ttn PE=1 SV=1	0	2806.44	1.636	0.617	2.967	0.469	0.459	0.98	0.160861	0.699445	0.06185	0.314786	0.36901	0.576482	0.875297	0.999952	0.674385	0.943749	0.990086	0.995093	817	308	1481.2	234.4	229.3	499.3	489.2	46.18	1.72	3.11	5.57	6.95		6.1	377.7	353.7	269.9
High	[K].LKENTEYNFRICAFNTEGVGEPATIPGSVVAQER.[M]	1xCarbamidomethyl [C12]; 1xTMTpro [K2]; 1xTMTpro [N-Term]	4.64094e-10	2.82963e-05	1	1	1	1	A2ASS6	A2ASS6 [26857-26890]	A2ASS6 1xCarbamidomethyl [C26868]	Titin OS=Mus musculus OX=10090 GN=Ttn PE=1 SV=1	2	4405.27	2.335	0.409	4.603	0.213	0.19	0.964	0.12304	0.327607	0.0564444	0.0160098	0.0226868	0.560979	0.817476	0.989785	0.65608	0.235756	0.393417	0.995093	1168	204.6	2302	106.5	95.2	500.1	482.3	42.25	2.04	2.34	4.33	1.44		7.16	523.6	521.5	178.9
High	[K].AYATITNNCTK.[N]	1xCarbamidomethyl [C9]; 1xTMTpro [K11]; 1xTMTpro [N-Term]	4.10305e-08	2.82963e-05	1	1	1	2	A2ASS6	A2ASS6 [27033-27043]	A2ASS6 1xCarbamidomethyl [C27041]	Titin OS=Mus musculus OX=10090 GN=Ttn PE=1 SV=1	0	1865.01	1.018	0.27	3.751	0.155	0.146	0.312	0.697293	0.143192	0.195365	0.00710868	0.0146788	0.411946	0.998922	0.900143	0.908826	0.134256	0.307367	0.994122	904.2	240.1	3333	138.1	129.4	888.5	277.1	64.24	4.63	2.62	6.54	4.27		11.45	486.2	336.6	220.1
High	[R].KAYATITNNCTK.[N]	1xCarbamidomethyl [C10]; 2xTMTpro [K1; K12]; 1xTMTpro [N-Term]	5.3166e-09	2.82963e-05	1	1	1	1	A2ASS6	A2ASS6 [27032-27043]	A2ASS6 1xCarbamidomethyl [C27041]	Titin OS=Mus musculus OX=10090 GN=Ttn PE=1 SV=1	1	2297.31	0.567	0.292	3.602	0.108	0.237	0.17	0.660441	0.186951	0.211021	0.00218288	0.0824045	0.0982201	0.996109	0.937973	0.921382	0.0576024	0.68465	0.851028	519.4	267.7	3298.5	98.5	217.4	915.7	155.7	61.53	14.69	12.41	8.99	0.04		31.31	272.7	198	263.6
High	[K].IENLQEGCSYYFR.[V]	1xCarbamidomethyl [C8]; 1xTMTpro [N-Term]	9.04847e-09	2.82963e-05	1	1	1	3	A2ASS6	A2ASS6 [27048-27060]	A2ASS6 1xCarbamidomethyl [C27055]	Titin OS=Mus musculus OX=10090 GN=Ttn PE=1 SV=1	0	1982.96	2.874	0.393	3.197	0.249	0.456	0.867	0.232583	0.344572	0.247759	0.0377767	0.373342	0.631562	0.945895	0.993373	0.94785	0.397899	0.990086	0.995093	2813.2	385.2	3129.4	243.9	446.6	979	849.1	54.86	1.98	3.05	0.24	8.2		8.47	1395.4	1135.2	346.5
High	[K].WSACTQVK.[T]	1xCarbamidomethyl [C4]; 1xTMTpro [K8]; 1xTMTpro [N-Term]	0.00021249	2.82963e-05	1	1	1	2	A2ASS6	A2ASS6 [27131-27138]	A2ASS6 1xCarbamidomethyl [C27134]	Titin OS=Mus musculus OX=10090 GN=Ttn PE=1 SV=1	0	1587.88	1.236	0.273	2.67	0.228	0.134	0.314	0.949843	0.153349	0.63248	0.00644436	0.00994793	0.32425	0.999984	0.911849	0.999526	0.126305	0.244674	0.994122	2532	558.2	5467.8	467.1	274.6	2048.2	643.5	61.01	0.87	11.55	5.1	3.92		7.65	1323.4	969.7	498.2
High	[K].EASREDVGTYELCVSNTAGSITVPITVIVLDRPGPPGPIR.[I]	1xCarbamidomethyl [C13]; 1xTMTpro [N-Term]	0.000214108	2.82963e-05	1	1	1	1	A2ASS6	A2ASS6 [27245-27284]	A2ASS6 1xCarbamidomethyl [C27257]	Titin OS=Mus musculus OX=10090 GN=Ttn PE=1 SV=1	1	4540.4	1.466	1.517	4.646	0.747	1.03	1.818	0.319371	0.435416	0.0075898	0.792451	0.727382	0.230704	0.983387	0.999596	0.277504	1	0.99991	0.981395	170.9	176.9	541.7	87.1	120.1	116.6	212	12.25	0.33	22.66	8.51	10.53		6.65	61.4	95.2	157.3
High	[R].LTTGSEYQFRVCAENR.[Y]	1xCarbamidomethyl [C12]; 1xTMTpro [N-Term]	0.0093361	0.000605469	1	1	1	3	A2ASS6	A2ASS6 [27340-27355]	A2ASS6 1xCarbamidomethyl [C27351]	Titin OS=Mus musculus OX=10090 GN=Ttn PE=1 SV=1	1	2235.11	1.401	0.751	4.298	0.611	0.635	0.847	0.522181	0.891779	0.28237	0.500714	0.644782	0.792961	0.996109	0.999952	0.964853	1	0.99991	0.997787	1637.1	877.4	5021.8	713.4	742.3	1168.5	989.8	41.4	4.09	13.18	5.09	7.84		7.61	729.1	735.8	756.1
High	[R].VCAENR.[Y]	1xCarbamidomethyl [C2]; 1xTMTpro [N-Term]	0.0422458	0.00298932	1	1	1	1	A2ASS6	A2ASS6 [27350-27355]	A2ASS6 1xCarbamidomethyl [C27351]	Titin OS=Mus musculus OX=10090 GN=Ttn PE=1 SV=1	0	1052.55	2.264	0.098	3.703	0.026	0.04	0.121	0.110023	0.00672456	0.0830718	6.93488e-09	7.33656e-06	0.0535525	0.792654	0.436855	0.733076	3.19202e-06	0.00173812	0.731507	1420.8	61.5	2324.6	16.2	25.1	627.7	76	68.93	0.05	3.61				33.99	797.3	506.8	54.5
High	[K].ACEPVPAR.[D]	1xCarbamidomethyl [C2]; 1xTMTpro [N-Term]	0.00155154	9.06176e-05	1	1	1	1	A2ASS6	A2ASS6 [27464-27471]	A2ASS6 1xCarbamidomethyl [C27465]	Titin OS=Mus musculus OX=10090 GN=Ttn PE=1 SV=1	0	1203.65	3.056	0.188	3.317	0.096	0.099	0.377	0.0387601	0.0282989	0.037485	0.000406129	0.0010756	0.515278	0.509578	0.677404	0.568295	0.0163079	0.063356	0.994122	1547.8	95.2	1680.3	48.4	50.1	506.6	190.8	51.23	3.77	1.88	1.17	10.98		17.05	745.2	643.5	86.7
High	[R].DPCDPPGQPEVTNITR.[K]	1xCarbamidomethyl [C3]; 1xTMTpro [N-Term]	6.13708e-08	2.82963e-05	1	1	1	2	A2ASS6	A2ASS6 [27472-27487]	A2ASS6 1xCarbamidomethyl [C27474]	Titin OS=Mus musculus OX=10090 GN=Ttn PE=1 SV=1	0	2100.04	4.591	0.316	2.879	0.207	0.248	0.469	0.0712127	0.265391	0.188781	0.0294684	0.0865724	0.737172	0.669333	0.973887	0.904608	0.343763	0.697341	0.995093	3387.2	233.3	2124	152.8	182.8	737.8	346	55.61	0.32	4.75	1.03	5.03		33.59	1690.7	1358.3	206.5
High	[K].CNFTNVQETYFEVTELTEDQR.[Y]	1xCarbamidomethyl [C1]; 1xTMTpro [N-Term]	2.05872e-10	2.82963e-05	1	1	1	1	A2ASS6	A2ASS6 [27523-27543]	A2ASS6 1xCarbamidomethyl [C27523]	Titin OS=Mus musculus OX=10090 GN=Ttn PE=1 SV=1	0	2927.37	2.096	0.545	1.853	0.389	0.537	1.102	0.102125	0.369278	0.188242	0.137917	0.414531	0.598124	0.773133	0.996752	0.904406	0.739975	0.99991	0.995093	505.4	131.4	446.9	93.7	129.5	241.2	265.8	70.9	0.78	5.13	9.05	10.77		9.93	288.9	177	117.2
High	[K].TEIVSTDYTTTLTVKDCVR.[R]	1xCarbamidomethyl [C17]; 1xTMTpro [K15]; 1xTMTpro [N-Term]	5.40243e-10	2.82963e-05	1	1	1	1	A2ASS6	A2ASS6 [27625-27643]	A2ASS6 1xCarbamidomethyl [C27641]	Titin OS=Mus musculus OX=10090 GN=Ttn PE=1 SV=1	1	2810.51	2.511	0.356	2.343	0.279	0.307	0.722	0.213555	0.316792	0.237771	0.069005	0.147282	0.856756	0.929887	0.989785	0.941387	0.546947	0.835166	0.998045	2172.8	307.6	2027.3	241.6	265.9	865.2	624.4	59.06	0.3	10.64	10.77	2.24		10.3	1116.7	846.2	272.3
High	[R].TMAVNCK.[V]	1xCarbamidomethyl [C6]; 1xTMTpro [K7]; 1xTMTpro [N-Term]	0.00320596	0.000207355	1	1	1	2	A2ASS6	A2ASS6 [27661-27667]	A2ASS6 1xCarbamidomethyl [C27666]	Titin OS=Mus musculus OX=10090 GN=Ttn PE=1 SV=1	0	1431.79	1.926	0.127	3.467	0.037	0.049	0.167	0.580686	0.0272839	0.427486	2.16108e-08	1.05797e-05	0.0921433	0.996109	0.673912	0.999091	7.65164e-06	0.00222797	0.843708	3092.8	204.3	5566.7	60.1	78.6	1605.7	268.6	65.92	18.44	13.44	48.91	5.49		25.98	1688.3	1134.1	206.6
High	[K].CSLSWGRPQEDGGADIDYYIVEK.[R]	1xCarbamidomethyl [C1]; 1xTMTpro [K23]; 1xTMTpro [N-Term]	1.4237e-05	2.82963e-05	1	1	1	1	A2ASS6	A2ASS6 [27689-27711]	A2ASS6 1xCarbamidomethyl [C27689]	Titin OS=Mus musculus OX=10090 GN=Ttn PE=1 SV=1	0	3266.63	1.124	0.378	1.567	0.429	0.893	0.612	0.821564	0.367762	0.676847	0.130682	0.750665	0.759759	0.999984	0.996752	0.999996	0.725462	0.99991	0.995903	1779.5	597.7	2479.4	678.7	1413.6	1582.6	968.6	70.28	7.76	17.54	3.31	5.87		15.38	1011.2	626.8	560.1
High	[R].LAWTICEAELR.[T]	1xCarbamidomethyl [C6]; 1xTMTpro [N-Term]	6.36942e-07	2.82963e-05	1	1	1	2	A2ASS6	A2ASS6 [27717-27727]	A2ASS6 1xCarbamidomethyl [C27722]	Titin OS=Mus musculus OX=10090 GN=Ttn PE=1 SV=1	0	1665.9	2.097	0.149	4.718	0.079	0.125	0.086	0.297726	0.0293437	0.186814	1.12804e-05	0.00805313	0.0120055	0.974428	0.678718	0.902987	0.00100402	0.218595	0.3811	2065.5	146.8	4646.5	78.2	123.6	984.8	84.4	57.72	0.11	3.42	56.15	10.33		85.85	1049.5	813.7	130.3
High	[K].IKNCAMADESVYGFK.[L]	1xCarbamidomethyl [C4]; 2xTMTpro [K2; K15]; 1xTMTpro [N-Term]	7.26534e-10	2.82963e-05	1	1	1	1	A2ASS6	A2ASS6 [2772-2786]	A2ASS6 1xCarbamidomethyl [C2775]	Titin OS=Mus musculus OX=10090 GN=Ttn PE=1 SV=1	1	2645.42	0.844	0.375	2.396	0.27	0.252	0.526	0.890843	0.312869	0.672134	0.0214012	0.0452586	0.642329	0.999984	0.989613	0.999996	0.284069	0.536304	0.995093	1593.2	708.7	4524.2	509.6	475.9	1888.3	993.6	45.65	4.58	18.67	15.17	4.9		18.06	733.5	692.7	649.4
High	[K].DSMTLCWSRPETDGGSDISGYIIER.[R]	1xCarbamidomethyl [C6]; 1xTMTpro [N-Term]	7.77306e-09	2.82963e-05	1	1	1	1	A2ASS6	A2ASS6 [27786-27810]	A2ASS6 1xCarbamidomethyl [C27791]	Titin OS=Mus musculus OX=10090 GN=Ttn PE=1 SV=1	1	3149.48	2.251	0.24	4.17	0.08	0.074	0.42	0.134151	0.112308	0.0609012	0.000395462	0.000960469	0.639075	0.834055	0.866871	0.672402	0.0159893	0.0584996	0.995093	1356.1	144.4	2512.4	48.5	44.5	602.5	253.3	65.5	1.21	3.96	8.59	6.63		8.5	737.5	499.1	127
High	[K].STGLREGCEYEYR.[V]	1xCarbamidomethyl [C8]; 1xTMTpro [N-Term]	1.10153e-07	2.82963e-05	1	1	1	2	A2ASS6	A2ASS6 [27833-27845]	A2ASS6 1xCarbamidomethyl [C27840]	Titin OS=Mus musculus OX=10090 GN=Ttn PE=1 SV=1	1	1923.92	3.566	0.298	4.227	0.185	0.166	0.46	0.0574161	0.158517	0.0954137	0.0113557	0.0129832	0.724689	0.604756	0.915786	0.764924	0.187823	0.286055	0.995093	2200.6	183.9	2608.1	114.1	102.3	617.1	283.9	50.98	6.94	7.12	17.87	10.34		18.71	1057.3	916.8	155.3
High	[K].AWVSVTNNCNR.[L]	1xCarbamidomethyl [C9]; 1xTMTpro [N-Term]	1.28227e-07	2.82963e-05	1	1	1	2	A2ASS6	A2ASS6 [28112-28122]	A2ASS6 1xCarbamidomethyl [C28120]	Titin OS=Mus musculus OX=10090 GN=Ttn PE=1 SV=1	0	1624.82	1.396	0.281	4.545	0.548	0.177	0.349	0.386771	0.230765	0.191715	0.389016	0.032474	0.411926	0.996089	0.960965	0.907561	0.97939	0.46897	0.994122	1402.6	282.2	4566.6	550.1	177.4	1004.7	350.9	63.29	4.1	12.47	5.99	4.62		19.04	747.9	526.5	243.2
High	[K].KAWVSVTNNCNR.[L]	1xCarbamidomethyl [C10]; 1xTMTpro [K1]; 1xTMTpro [N-Term]	4.55971e-07	2.82963e-05	1	1	1	1	A2ASS6	A2ASS6 [28111-28122]	A2ASS6 1xCarbamidomethyl [C28120]	Titin OS=Mus musculus OX=10090 GN=Ttn PE=1 SV=1	1	2057.12	1.27	0.312	4.662	0.218	0.198	0.581	0.555536	0.286812	0.195007	0.0243306	0.0512127	0.8909	0.996109	0.977673	0.908826	0.306583	0.565343	0.998093	1266.3	311.5	4649.1	217	197.2	997.3	579.2	58.41	10.66	3.09	6.18	4.11		4.84	647.2	495.9	256.2
High	[R].FGISDHIDSVCVVVK.[L]	1xCarbamidomethyl [C11]; 1xTMTpro [K15]; 1xTMTpro [N-Term]	3.29719e-10	2.82963e-05	1	1	1	2	A2ASS6	A2ASS6 [28439-28453]	A2ASS6 1xCarbamidomethyl [C28449]	Titin OS=Mus musculus OX=10090 GN=Ttn PE=1 SV=1	0	2283.27	2.232	0.3	2.827	0.135	0.138	0.784	0.473392	0.184276	0.477686	0.000641461	0.00439763	0.955304	0.996109	0.937224	0.999091	0.0230411	0.15318	0.999948	3304.4	444.9	4185.7	199.6	204.7	1480.4	1160.1	47.97	13.48	9.56	3.47	4.41		11.93	1549.6	1410.4	434.2
High	[K].PSHPSEPVLAIDACEPPRNVR.[I]	1xCarbamidomethyl [C14]; 1xTMTpro [N-Term]	5.81447e-07	2.82963e-05	1	1	1	1	A2ASS6	A2ASS6 [28544-28564]	A2ASS6 1xCarbamidomethyl [C28557]	Titin OS=Mus musculus OX=10090 GN=Ttn PE=1 SV=1	1	2645.38	3.774	1.245	2.176	0.539	0.714	1.075	0.0161129	0.66062	0.0847305	0.418732	0.831173	0.555932	0.317334	0.999952	0.736936	0.991025	0.99991	0.995093	505.7	166.9	291.6	72.2	95.7	134	144	33.38	3.55	6.91	6.76	1.62		1.83	211.9	241.6	151.8
High	[R].VYAENAAGIGKPSHPSEPVLAIDACEPPR.[N]	1xCarbamidomethyl [C25]; 1xTMTpro [K11]; 1xTMTpro [N-Term]	3.13158e-12	2.82963e-05	1	1	1	4	A2ASS6	A2ASS6 [28533-28561]	A2ASS6 1xCarbamidomethyl [C28557]	Titin OS=Mus musculus OX=10090 GN=Ttn PE=1 SV=1	1	3653.92	1.654	0.361	3.564	0.242	0.24	0.623	0.942563	0.267825	0.431808	0.0186917	0.0279172	0.834689	0.999984	0.973941	0.999091	0.261425	0.435211	0.997925	4328	944	9328	633.7	628.7	2617.3	1631.8	50.75	9	0.51	16.09	2.25		10.31	2075.5	1806.5	785.7
High	[R].VYAENAAGIGKPSHPSEPVLAIDACEPPRNVR.[I]	1xCarbamidomethyl [C25]; 1xTMTpro [K11]; 1xTMTpro [N-Term]	2.44974e-09	2.82963e-05	1	1	1	1	A2ASS6	A2ASS6 [28533-28564]	A2ASS6 1xCarbamidomethyl [C28557]	Titin OS=Mus musculus OX=10090 GN=Ttn PE=1 SV=1	2	4023.14	2.495	0.316	5.498	0.164	0.161	0.397	0.136179	0.171412	0.0750675	0.00650578	0.0233681	0.549887	0.838626	0.924486	0.712949	0.12704	0.398996	0.995093	1360	172	2997.3	89.2	88	545.1	216.2	43.96	12.73	3.41	15.17	10.23		3.93	617.9	599.2	139.4
High	[R].NAVGSVSNPSEVVGPITCIDSYGGPVIDLPLEYTEVVK.[Y]	1xCarbamidomethyl [C18]; 1xTMTpro [K38]; 1xTMTpro [N-Term]	2.01233e-10	2.82963e-05	1	1	1	2	A2ASS6	A2ASS6 [28635-28672]	A2ASS6 1xCarbamidomethyl [C28652]	Titin OS=Mus musculus OX=10090 GN=Ttn PE=1 SV=1	0	4583.41	2.019	0.255	1.951	0.139	0.148	0.491	0.1567	0.103812	0.195154	0.00280661	0.01867	0.791188	0.870196	0.858517	0.908826	0.0692943	0.355734	0.997787	1347.9	170.2	1302.4	92.5	98.6	667.7	328.1	67.94	8.24	14.07	1.33	20.79		20.22	749.5	485.2	160
High	[K].ELQTNALVCVENSTDLASILIK.[D]	1xCarbamidomethyl [C9]; 1xTMTpro [K22]; 1xTMTpro [N-Term]	2.37642e-09	2.82963e-05	1	1	1	1	A2ASS6	A2ASS6 [28701-28722]	A2ASS6 1xCarbamidomethyl [C28709]	Titin OS=Mus musculus OX=10090 GN=Ttn PE=1 SV=1	0	3039.69	1.942	0.668	2.465	0.433	0.603	1.192	0.14766	0.761501	0.0773042	0.311355	0.631138	0.439828	0.859212	0.999952	0.717762	0.943749	0.99991	0.994122	936	321.8	1187.9	208.8	290.7	482	574.7	38.31	1.86	2.64	11.04	2.84		10.86	407.1	430.8	289.2
High	[K].LMLQSISPSDAGEYTAMVGQLECK.[A]	1xCarbamidomethyl [C23]; 1xTMTpro [K24]; 1xTMTpro [N-Term]	2.6541e-05	2.82963e-05	1	1	1	1	A2ASS6	A2ASS6 [2857-2880]	A2ASS6 1xCarbamidomethyl [C2879]	Titin OS=Mus musculus OX=10090 GN=Ttn PE=1 SV=1	0	3236.65	1.421	1.467	1.216	0.695	1.045	1.415	0.270622	0.439099	0.376813	0.711294	0.723686	0.337828	0.965783	0.999596	0.991802	1	0.99991	0.994122	637.4	658.2	545.4	311.6	468.9	448.6	634.6	9.51	17.31	5.46	8.43	1.47		0.84	224.6	362.1	660.3
High	[R].VCAVNAAGVGPFSEPSDFYK.[A]	1xCarbamidomethyl [C2]; 1xTMTpro [K20]; 1xTMTpro [N-Term]	5.23644e-09	2.82963e-05	1	1	1	1	A2ASS6	A2ASS6 [28929-28948]	A2ASS6 1xCarbamidomethyl [C28930]	Titin OS=Mus musculus OX=10090 GN=Ttn PE=1 SV=1	0	2723.4	1.45	0.176	3.022	0.053	0.048	0.292	0.582421	0.0802432	0.403655	2.6486e-07	4.38869e-05	0.281705	0.996109	0.827604	0.995115	5.23546e-05	0.00654647	0.994122	1981	240.1	4130.3	71.9	66.1	1366.7	399.4	52.79	5.95	13.55		7.45		1.76	966	813.2	222.1
High	[K].VTGLTENSDYQYRVCAVNAAGVGPFSEPSDFYK.[A]	1xCarbamidomethyl [C15]; 1xTMTpro [K33]; 1xTMTpro [N-Term]	2.26868e-08	2.82963e-05	1	1	1	1	A2ASS6	A2ASS6 [28916-28948]	A2ASS6 1xCarbamidomethyl [C28930]	Titin OS=Mus musculus OX=10090 GN=Ttn PE=1 SV=1	1	4250.1	1.874	0.359	3.588	0.202	0.23	0.785	0.185175	0.326982	0.234549	0.0303447	0.0652098	0.784799	0.899829	0.989785	0.938924	0.350558	0.626604	0.997212	1570.9	300.6	3007.8	168.9	192.4	838.3	658.2	42.01	0.22	5.92	11.52	2		5.42	702.9	702.7	266.2
High	[K].AASFECEVSHFNVPSMWLK.[N]	1xCarbamidomethyl [C6]; 1xTMTpro [K19]; 1xTMTpro [N-Term]	7.4895e-10	2.82963e-05	1	1	1	1	A2ASS6	A2ASS6 [2904-2922]	A2ASS6 1xCarbamidomethyl [C2909]	Titin OS=Mus musculus OX=10090 GN=Ttn PE=1 SV=1	0	2847.45	1.415	0.314	5.223	0.145	0.183	0.511	0.489039	0.253297	0.194809	0.0019791	0.0113375	0.684133	0.996109	0.96968	0.908826	0.0532274	0.263941	0.995093	1609.4	357.1	5942.6	164.5	208.3	1137.7	581	39.73	10.13	0.54	12.05	2.8		9.5	707.6	732.7	294.8
High	[K].VLDTPAACQK.[L]	1xCarbamidomethyl [C8]; 1xTMTpro [K10]; 1xTMTpro [N-Term]	2.95477e-06	2.82963e-05	1	1	1	3	A2ASS6	A2ASS6 [29151-29160]	A2ASS6 1xCarbamidomethyl [C29158]	Titin OS=Mus musculus OX=10090 GN=Ttn PE=1 SV=1	0	1710.97	1.81	0.184	3.124	0.112	0.117	0.295	0.960056	0.0910137	0.544266	0.000257604	0.00255619	0.358362	0.999984	0.838657	0.999526	0.0115125	0.112361	0.994122	5010.9	509.8	8647.7	310.8	322.9	2768.6	816.1	62.3	1.35	8.36	3.77	14		10.7	2648.7	1897.5	447.9
High	[R].TWSVVSHKCSGTSFK.[V]	1xCarbamidomethyl [C9]; 2xTMTpro [K8; K15]; 1xTMTpro [N-Term]	2.38863e-06	2.82963e-05	1	1	1	1	A2ASS6	A2ASS6 [29200-29214]	A2ASS6 1xCarbamidomethyl [C29208]	Titin OS=Mus musculus OX=10090 GN=Ttn PE=1 SV=1	1	2623.45	2.236	0.439	3.029	0.335	0.278	0.761	0.291172	0.489223	0.2697	0.0831613	0.0917824	0.839226	0.973728	0.999596	0.957575	0.596017	0.714282	0.997925	2252.1	442.4	3051.3	337.4	279.6	1007.4	766.5	34.5	1.3	12.89	1.39	3.05		6.69	951.6	1066.9	396.1
High	[R].VLAENEIGIGEPCETTEPVK.[A]	1xCarbamidomethyl [C13]; 1xTMTpro [K20]; 1xTMTpro [N-Term]	1.50652e-09	2.82963e-05	1	1	1	3	A2ASS6	A2ASS6 [29228-29247]	A2ASS6 1xCarbamidomethyl [C29240]	Titin OS=Mus musculus OX=10090 GN=Ttn PE=1 SV=1	0	2793.48	2.367	0.329	3.115	0.19	0.169	0.581	0.562205	0.2898	0.468604	0.00842416	0.0217152	0.70814	0.996109	0.979382	0.999091	0.153003	0.38584	0.995093	3840	533.4	5052.7	308.5	274.5	1622.1	942.4	54.45	5.51	6.22	2.34	11.54		6.13	1898.3	1554.8	492
High	[K].GEQAWSHAGISKTCEIEIGQLK.[E]	1xCarbamidomethyl [C14]; 2xTMTpro [K12; K22]; 1xTMTpro [N-Term]	0.00248777	0.000117823	1	1	1	1	A2ASS6	A2ASS6 [29294-29315]	A2ASS6 1xCarbamidomethyl [C29307]	Titin OS=Mus musculus OX=10090 GN=Ttn PE=1 SV=1	1	3354.83	0.953	0.614	3.544	0.46	0.216	0.426	0.766238	0.774535	0.139289	0.304166	0.0848702	0.596045	0.999984	0.999952	0.844429	0.939335	0.691533	0.995093	677.6	436.3	2518.9	326.9	153.7	710.7	302.8	24.4	3.02	0.58	10.03	2.47		4.84	265.7	345.9	395.4
High	[K].TCEIEIGQLK.[E]	1xCarbamidomethyl [C2]; 1xTMTpro [K10]; 1xTMTpro [N-Term]	2.73862e-06	2.82963e-05	1	1	1	2	A2ASS6	A2ASS6 [29306-29315]	A2ASS6 1xCarbamidomethyl [C29307]	Titin OS=Mus musculus OX=10090 GN=Ttn PE=1 SV=1	0	1799.02	2.384	0.186	2.176	0.115	0.14	0.472	0.500106	0.0534491	0.613273	0.000598431	0.00614718	0.619349	0.996109	0.758739	0.999526	0.0218116	0.186851	0.995093	3492.5	273.2	3189.1	169.1	205	1465.3	691.2	64.33	11.31	20.14	14.81	17.76		14.83	1879.5	1299	262.6
High	[K].EHGGKYTVILDNAVCR.[N]	1xCarbamidomethyl [C15]; 1xTMTpro [K5]; 1xTMTpro [N-Term]	8.56576e-07	2.82963e-05	1	1	1	1	A2ASS6	A2ASS6 [29418-29433]	A2ASS6 1xCarbamidomethyl [C29432]	Titin OS=Mus musculus OX=10090 GN=Ttn PE=1 SV=1	1	2440.33	1.326	0.529	5.465	0.34	0.352	0.34	0.371464	0.367883	0.00425514	0.0543753	0.101995	0.348008	0.994266	0.996752	0.214156	0.482504	0.742373	0.994122	423.2	168.8	1743.7	108.4	112.5	319.1	108.6	43.85	2.64	2.34	12.4	0.88		5.2	192.1	186.6	147
High	[K].KEHGGKYTVILDNAVCR.[N]	1xCarbamidomethyl [C16]; 2xTMTpro [K1; K6]; 1xTMTpro [N-Term]	0.023868	0.00169995	1	1	1	1	A2ASS6	A2ASS6 [29417-29433]	A2ASS6 1xCarbamidomethyl [C29432]	Titin OS=Mus musculus OX=10090 GN=Ttn PE=1 SV=1	2	2872.63	1.122	0.988	1.514	0.984	1.193	1.253	0.44895	0.828003	0.216941	0.918921	0.52504	0.455393	0.996109	0.999952	0.92595	1	0.99991	0.994122	452.3	398	610.2	396.5	480.8	403	505	5.48	6.35	2.19	6.35	1.42		5.33	154.9	264.4	337.5
High	[K].YTVILDNAVCR.[N]	1xCarbamidomethyl [C10]; 1xTMTpro [N-Term]	2.5021e-07	2.82963e-05	1	1	1	4	A2ASS6	A2ASS6 [29423-29433]	A2ASS6 1xCarbamidomethyl [C29432]	Titin OS=Mus musculus OX=10090 GN=Ttn PE=1 SV=1	0	1627.88	1.745	0.532	3.805	0.299	0.31	0.529	0.472318	0.605386	0.34102	0.0819247	0.122677	0.750048	0.996109	0.999952	0.98435	0.591695	0.787665	0.995093	2514.4	766.4	5481.4	430	447.1	1440.7	762.4	54.61	3.81	4.12	5.72	0.7		0.39	1244.7	1016.7	661.8
High	[K].ADSAIMSWDIPEDDGGGEITCYSIEK.[R]	1xCarbamidomethyl [C21]; 1xTMTpro [K26]; 1xTMTpro [N-Term]	2.3053e-09	2.82963e-05	1	1	1	2	A2ASS6	A2ASS6 [29460-29485]	A2ASS6 1xCarbamidomethyl [C29480]	Titin OS=Mus musculus OX=10090 GN=Ttn PE=1 SV=1	0	3467.65	1.592	0.265	3.692	0.076	0.131	0.319	0.701181	0.197945	0.401237	0.000120278	0.00227145	0.298858	0.999058	0.946244	0.994192	0.00646476	0.10381	0.994122	2777.3	463.1	6442.1	132.9	229	1744.9	556.7	60.92	6.23	8.65	53.01	20.56		2.6	1450.5	1064.4	429.3
High	[K].ADSAIMSWDIPEDDGGGEITCYSIEKR.[E]	1xCarbamidomethyl [C21]; 1xTMTpro [K26]; 1xTMTpro [N-Term]	7.49565e-11	2.82963e-05	1	1	1	4	A2ASS6	A2ASS6 [29460-29486]	A2ASS6 1xCarbamidomethyl [C29480]	Titin OS=Mus musculus OX=10090 GN=Ttn PE=1 SV=1	1	3623.75	1.543	0.42	5.05	0.166	0.171	0.521	0.918696	0.350101	0.207398	0.0032602	0.00339784	0.75502	0.999984	0.993373	0.920341	0.0779257	0.131743	0.995562	3499.8	952.3	11452.5	376.1	388	2268	1181.2	54.45	3.24	0.66	13.54	13.11		14.25	1730.1	1417.1	825.6
High	[R].EASQTNWKMVCSSVAR.[T]	1xCarbamidomethyl [C11]; 1xTMTpro [K8]; 1xTMTpro [N-Term]	2.44974e-09	2.82963e-05	1	1	1	1	A2ASS6	A2ASS6 [29487-29502]	A2ASS6 1xCarbamidomethyl [C29497]	Titin OS=Mus musculus OX=10090 GN=Ttn PE=1 SV=1	1	2462.28	3.398	0.182	4.631	0.116	0.121	0.292	0.135574	0.0563679	0.212918	0.00226213	0.00630778	0.358647	0.836993	0.766435	0.923628	0.0591127	0.189576	0.994122	2918.4	156.4	3978.2	100	103.9	858.9	250.9	49.11	4.98	1.83	22.15	10.71			1381.2	1234.3	133.9
High	[K].MVCSSVAR.[T]	1xCarbamidomethyl [C3]; 1xTMTpro [N-Term]	0.000515691	2.82963e-05	1	1	1	1	A2ASS6	A2ASS6 [29495-29502]	A2ASS6 1xCarbamidomethyl [C29497]	Titin OS=Mus musculus OX=10090 GN=Ttn PE=1 SV=1	0	1213.64	2.602	0.132	5.604	0.051	0.059	0.149	0.0574503	0.00138702	0.00528741	3.16123e-07	1.91998e-06	0.0525659	0.604771	0.201545	0.23498	5.9218e-05	0.000583601	0.728582	834.6	42.2	1797.6	16.5	19	320.8	47.8	61.35	0.15	3.36		23.7		32.55	437.5	318.7	37.4
High	[K].CREPVNPPSAPSVVK.[V]	1xCarbamidomethyl [C1]; 1xTMTpro [K15]; 1xTMTpro [N-Term]	1.20666e-07	2.82963e-05	1	1	1	2	A2ASS6	A2ASS6 [30036-30050]	A2ASS6 1xCarbamidomethyl [C30036]	Titin OS=Mus musculus OX=10090 GN=Ttn PE=1 SV=1	1	2245.26	4.077	0.486	1.3	0.398	0.483	1.213	0.048571	0.510124	0.465676	0.277037	0.426134	0.456529	0.560595	0.999596	0.999091	0.922121	0.99991	0.994122	2858.5	340.9	911.1	278.7	338.7	701.1	850.6	62.27	6.14	9.84	2.79	12.37		23.32	1510.6	1082.7	315.8
High	[K].VNTEPCVK.[T]	1xCarbamidomethyl [C6]; 1xTMTpro [K8]; 1xTMTpro [N-Term]	0.00039564	2.82963e-05	1	1	1	1	A2ASS6	A2ASS6 [30092-30099]	A2ASS6 1xCarbamidomethyl [C30097]	Titin OS=Mus musculus OX=10090 GN=Ttn PE=1 SV=1	0	1554.88	1.178	0.081	2.673	0.052	0.039	0.118	0.578369	0.00456477	0.326884	2.67764e-06	9.43179e-06	0.0225222	0.996109	0.36954	0.982386	0.000326512	0.00206729	0.50569	1278.5	88.1	2901.1	56.7	42.4	1085.3	127.7	64.41	0.87	17.35		15.91		3.84	688.5	475.2	78.6
High	[K].VNTEPCVKTRYTVTDLQAGEEYK.[F]	1xCarbamidomethyl [C6]; 2xTMTpro [K8; K23]; 1xTMTpro [N-Term]	0.0700479	0.00480857	1	1	1	1	A2ASS6	A2ASS6 [30092-30114]	A2ASS6 1xCarbamidomethyl [C30097]	Titin OS=Mus musculus OX=10090 GN=Ttn PE=1 SV=1	2	3613.94	3.507	0.363	1.266	0.369	0.332	2.185	0.0107067	0.124908	0.412128	0.0721825	0.10637	0.144936	0.24758	0.883468	0.998276	0.558396	0.754237	0.918012	810.6	83.8	292.6	85.2	76.6	231.1	505.1	52.08	3.25	15.22	4.18	20.28		12.23	393	334.7	76.1
High	[R].VSAVNGAGKGDSCEVTGTIK.[A]	1xCarbamidomethyl [C13]; 2xTMTpro [K9; K20]; 1xTMTpro [N-Term]	8.58692e-10	2.82963e-05	1	1	1	2	A2ASS6	A2ASS6 [30117-30136]	A2ASS6 1xCarbamidomethyl [C30129]	Titin OS=Mus musculus OX=10090 GN=Ttn PE=1 SV=1	1	2862.58	0.526	0.197	3.231	0.062	0.052	0.164	0.45361	0.100772	0.514058	1.25472e-06	2.10439e-06	0.0724635	0.996109	0.855161	0.999526	0.000181314	0.00062781	0.793389	1397.2	523.6	8582.6	164.2	138	2656.2	436.8	76.91	14.05	23.65	53.36	15.12		27.99	846.7	461.5	513.2
High	[R].ADIHTTDSFSTLTVENCNR.[N]	1xCarbamidomethyl [C17]; 1xTMTpro [N-Term]	5.35715e-09	2.82963e-05	1	1	1	2	A2ASS6	A2ASS6 [30191-30209]	A2ASS6 1xCarbamidomethyl [C30207]	Titin OS=Mus musculus OX=10090 GN=Ttn PE=1 SV=1	0	2485.19	1.237	0.46	4.01	0.292	0.223	0.59	0.527581	0.478715	0.19778	0.116001	0.0723349	0.906695	0.996109	0.999596	0.912596	0.68895	0.654042	0.998563	952.2	353.9	3087	224.7	171.9	769.8	454.1	58.76	0.53	5.9	6.85	1.04		14.69	488.1	371.8	315.1
High	[R].ADIHTTDSFSTLTVENCNRNDAGK.[Y]	1xCarbamidomethyl [C17]; 1xTMTpro [K24]; 1xTMTpro [N-Term]	6.53769e-11	2.82963e-05	1	1	1	2	A2ASS6	A2ASS6 [30191-30214]	A2ASS6 1xCarbamidomethyl [C30207]	Titin OS=Mus musculus OX=10090 GN=Ttn PE=1 SV=1	1	3274.63	1.799	0.297	4.038	0.161	0.222	0.327	0.468432	0.208581	0.31663	0.00342344	0.0423957	0.383514	0.996109	0.952827	0.981698	0.0809862	0.520575	0.994122	2529.9	417.7	5677.2	225.7	312.8	1406	459.4	54.54	3.45	4.76	4.33	13.71		11.14	1251.6	1023.6	379.7
High	[R].RSWQVVSEKCTR.[Q]	1xCarbamidomethyl [C10]; 1xTMTpro [K9]; 1xTMTpro [N-Term]	0.0245491	0.00172427	1	1	1	1	A2ASS6	A2ASS6 [30282-30293]	A2ASS6 1xCarbamidomethyl [C30291]	Titin OS=Mus musculus OX=10090 GN=Ttn PE=1 SV=1	2	2144.19	1.787	0.522	4.877	0.171	0.142	0.623	0.129933	0.466154	0.00663818	0.00358039	0.00344931	0.981842	0.827371	0.999596	0.258776	0.0837764	0.132687	0.999948	713.7	208.5	1948.1	68.1	56.8	399.4	248.8	42.59	0.83	6.23	5.51	6.4		11.05	320.8	317.8	186
High	[R].SWQVVSEKCTR.[Q]	1xCarbamidomethyl [C9]; 1xTMTpro [K8]; 1xTMTpro [N-Term]	1.67144e-06	2.82963e-05	1	1	1	1	A2ASS6	A2ASS6 [30283-30293]	A2ASS6 1xCarbamidomethyl [C30291]	Titin OS=Mus musculus OX=10090 GN=Ttn PE=1 SV=1	1	1988.09	2.323	0.277	3.576	0.151	0.197	0.322	0.131321	0.162677	0.183008	0.00662102	0.0551532	0.438079	0.829871	0.918091	0.898937	0.127972	0.583704	0.994122	1902.9	227	2929.4	124.1	161.1	819.2	263.8	51.37	12.72	4.98	1.34	7.17		4.58	917.2	790.2	220.4
High	[K].EPQIEPTADLTGITNQLITCK.[A]	1xCarbamidomethyl [C20]; 1xTMTpro [K21]; 1xTMTpro [N-Term]	3.44246e-07	2.82963e-05	1	1	1	4	A2ASS6	A2ASS6 [30429-30449]	A2ASS6 1xCarbamidomethyl [C30448]	Titin OS=Mus musculus OX=10090 GN=Ttn PE=1 SV=1	0	2950.61	1.941	0.206	2.753	0.069	0.126	0.326	0.945521	0.124985	0.663991	2.6196e-06	0.00214559	0.336002	0.999984	0.883468	0.999996	0.000322151	0.100627	0.994122	5442.8	576.4	7718.1	194.3	352.4	2803.5	914.1	59.69	4.07	9.8	50.51	1.32		12.72	2812.4	2108.4	526.2
High	[K].YKEYCFR.[V]	1xCarbamidomethyl [C5]; 1xTMTpro [K2]; 1xTMTpro [N-Term]	0.00315857	0.000207355	1	1	1	1	A2ASS6	A2ASS6 [30597-30603]	A2ASS6 1xCarbamidomethyl [C30601]	Titin OS=Mus musculus OX=10090 GN=Ttn PE=1 SV=1	1	1673.9	1.874	0.131	2.475	0.053	0.09	0.173	0.39944	0.0294679	0.426984	2.76765e-05	0.00159556	0.109355	0.996109	0.680125	0.999091	0.00203593	0.0837528	0.868689	2113.3	147.7	2790.2	59.4	101.7	1127.6	194.6	63.99	18.92	12.65	3.54	0.71		32.14	1133.9	788.4	149.9
High	[K].YKEYCFRVSSENR.[F]	1xCarbamidomethyl [C5]; 1xTMTpro [K2]; 1xTMTpro [N-Term]	0.0980698	0.00621843	1	1	1	1	A2ASS6	A2ASS6 [30597-30609]	A2ASS6 1xCarbamidomethyl [C30601]	Titin OS=Mus musculus OX=10090 GN=Ttn PE=1 SV=1	2	2346.22	2.931	0.53	2.334	0.316	0.427	0.682	0.156744	0.572378	0.106912	0.1393	0.35484	0.968803	0.870291	0.999952	0.79298	0.743603	0.989183	0.999948	2150.7	388.7	1712.6	231.6	313.4	733.6	500.5	53.48	5.34	1.8	1.28	5.73		1.43	1054.7	877.8	332
High	[K].GSESTGPVTCRDEYAPPK.[A]	1xCarbamidomethyl [C10]; 1xTMTpro [K18]; 1xTMTpro [N-Term]	1.52833e-08	2.82963e-05	1	1	1	1	A2ASS6	A2ASS6 [30817-30834]	A2ASS6 1xCarbamidomethyl [C30826]	Titin OS=Mus musculus OX=10090 GN=Ttn PE=1 SV=1	1	2559.3	2.659	0.108	4.171	0.079	0.065	0.146	0.0621474	0.00690671	0.060566	0.000141814	0.000287845	0.0687635	0.629613	0.441562	0.671364	0.0074056	0.0242784	0.783129	1596	64.8	2502.9	47.2	38.9	600.1	87.8	52.3	5.25	0.69		32.53		28.02	775.1	657.8	59.7
High	[K].GSESTGPVTCRDEYAPPKAELDAR.[L]	1xCarbamidomethyl [C10]; 1xTMTpro [K18]; 1xTMTpro [N-Term]	7.64957e-08	2.82963e-05	1	1	1	1	A2ASS6	A2ASS6 [30817-30840]	A2ASS6 1xCarbamidomethyl [C30826]	Titin OS=Mus musculus OX=10090 GN=Ttn PE=1 SV=1	2	3214.63	1.553	0.338	6.853	0.075	0.04	0.17	0.197293	0.135883	0.0474802	2.91404e-06	7.0488e-07	0.0994081	0.913989	0.891901	0.620362	0.000345185	0.000276966	0.851028	683.7	149	3017.5	33.2	17.6	440.3	75	52.98	0.87	5.51		22.07		9.2	333.9	280.2	133
High	[R].AMFECEVSEPDITVQWMK.[D]	1xCarbamidomethyl [C5]; 1xTMTpro [K18]; 1xTMTpro [N-Term]	1.35341e-08	2.82963e-05	1	1	1	2	A2ASS6	A2ASS6 [3081-3098]	A2ASS6 1xCarbamidomethyl [C3085]	Titin OS=Mus musculus OX=10090 GN=Ttn PE=1 SV=1	0	2808.39	1.769	0.342	4.809	0.166	0.184	0.546	0.23296	0.226083	0.0461918	0.00625252	0.0304369	0.87138	0.945895	0.957829	0.612873	0.123517	0.452968	0.998045	960.3	185.7	2610.4	90	99.7	542.8	296.5	41.04	4.23	1.86	6.42	11.85		1.9	426.5	432.8	169.7
High	[K].ELDLCEK.[I]	1xCarbamidomethyl [C5]; 1xTMTpro [K7]; 1xTMTpro [N-Term]	0.00299806	0.000207355	1	1	1	2	A2ASS6	A2ASS6 [30876-30882]	A2ASS6 1xCarbamidomethyl [C30880]	Titin OS=Mus musculus OX=10090 GN=Ttn PE=1 SV=1	0	1514.84	3.285	0.26	1.771	0.198	0.228	0.404	0.641424	0.201136	0.924916	0.00495531	0.0325972	0.480658	0.996109	0.94818	0.999996	0.105525	0.469505	0.994122	7612.3	602	4103	458.2	528.9	2316.9	937	64.64	4.03	13.24	3.65	22.06		9.36	4108.1	2823.4	549.4
High	[R].ATAVIKYCDRSDSGK.[Y]	1xCarbamidomethyl [C8]; 2xTMTpro [K6; K15]; 1xTMTpro [N-Term]	0.000380935	2.82963e-05	1	1	1	1	A2ASS6	A2ASS6 [30892-30906]	A2ASS6 1xCarbamidomethyl [C30899]	Titin OS=Mus musculus OX=10090 GN=Ttn PE=1 SV=1	2	2583.44	2.71	0.251	2.246	0.159	0.229	0.483	0.230128	0.121382	0.372062	0.00407482	0.02571	0.751618	0.944228	0.881446	0.990267	0.0920691	0.418228	0.995093	2973.9	275.8	2464.9	175	251.6	1097.4	530.1	57.58	7.87	15.7	10.94	8.22		9.94	1509.3	1172.9	258.7
High	[R].VTEEKCTLAWSLPQEDGGAEITHYIVER.[R]	1xCarbamidomethyl [C6]; 1xTMTpro [K5]; 1xTMTpro [N-Term]	1.97874e-08	2.82963e-05	1	1	1	1	A2ASS6	A2ASS6 [30941-30968]	A2ASS6 1xCarbamidomethyl [C30946]	Titin OS=Mus musculus OX=10090 GN=Ttn PE=1 SV=1	1	3839.98	1.512	1.177	2.427	0.818	1.044	2.166	0.271539	0.725662	0.0591102	0.7843	0.785398	0.151079	0.965783	0.999952	0.665588	1	0.99991	0.925242	352.2	274.2	565.3	190.6	243.2	232.9	504.6	31.29	4.23	0.41	0.56	5.8		7.26	145.3	170.9	236.1
High	[R].LKVTSLMEGCDYQFR.[V]	1xCarbamidomethyl [C10]; 1xTMTpro [K2]; 1xTMTpro [N-Term]	1.69702e-06	2.82963e-05	1	1	1	1	A2ASS6	A2ASS6 [31089-31103]	A2ASS6 1xCarbamidomethyl [C31098]	Titin OS=Mus musculus OX=10090 GN=Ttn PE=1 SV=1	1	2455.3	1.828	0.652	3.12	0.374	0.59	0.953	0.627101	0.67835	0.469282	0.100181	0.335937	0.779326	0.996109	0.999952	0.999091	0.647988	0.987609	0.997212	2957.1	1055.4	5047.3	604.5	954.4	1617.7	1541.2	37.26	2.2	1.51	0.39	4.94		4.21	1275.8	1371.9	950.9
High	[K].VTSLMEGCDYQFR.[V]	1xCarbamidomethyl [C8]; 1xTMTpro [N-Term]	1.76563e-08	2.82963e-05	1	1	1	3	A2ASS6	A2ASS6 [31091-31103]	A2ASS6 1xCarbamidomethyl [C31098]	Titin OS=Mus musculus OX=10090 GN=Ttn PE=1 SV=1	0	1909.91	2.053	0.729	2.616	1.049	0.542	1.273	0.181804	0.923537	0.105064	0.851344	0.508197	0.430456	0.896279	0.999952	0.787427	1	0.99991	0.994122	1425.8	506.3	1817.2	728.9	376.7	694.6	884	42.37	2.52	5.94	0.51	0.6		7.63	639.8	636	441.2
High	[R].VTAVNAAGNSEPSEASNFISCR.[E]	1xCarbamidomethyl [C21]; 1xTMTpro [N-Term]	1.97022e-12	2.82963e-05	1	1	1	3	A2ASS6	A2ASS6 [31104-31125]	A2ASS6 1xCarbamidomethyl [C31124]	Titin OS=Mus musculus OX=10090 GN=Ttn PE=1 SV=1	0	2585.26	1.373	0.604	3.009	0.498	0.463	0.93	0.431908	0.785794	0.21529	0.367001	0.435384	0.674591	0.996109	0.999952	0.92595	0.970199	0.99991	0.995093	1123.1	494.3	2461.4	407.7	379.2	818.1	761.2	44.53	0.41	5.59	5.95	7.8		13.36	512.5	492.6	439.7
High	[R].VTAVNAAGNSEPSEASNFISCREPSYTPGPPSAPR.[V]	1xCarbamidomethyl [C21]; 1xTMTpro [N-Term]	2.33052e-13	2.82963e-05	1	1	1	6	A2ASS6	A2ASS6 [31104-31138]	A2ASS6 1xCarbamidomethyl [C31124]	Titin OS=Mus musculus OX=10090 GN=Ttn PE=1 SV=1	1	3921.9	2.627	0.38	5.176	0.103	0.119	0.527	0.329434	0.368401	0.214295	0.000526173	0.00266789	0.775983	0.986402	0.996752	0.925307	0.0196902	0.114762	0.997212	3210.4	464.8	6326	126.2	145.4	1222.1	644.4	50.11	10.79	6.04	28.66	3.24		1.68	1531.6	1347	382
High	[K].DTDQWCRVHTNATIR.[N]	1xCarbamidomethyl [C6]; 1xTMTpro [N-Term]	3.49223e-06	2.82963e-05	1	1	1	3	A2ASS6	A2ASS6 [31173-31187]	A2ASS6 1xCarbamidomethyl [C31178]	Titin OS=Mus musculus OX=10090 GN=Ttn PE=1 SV=1	1	2177.08	5.127	0.521	2.698	0.22	0.343	0.849	0.0224127	0.660005	0.0788648	0.0290614	0.223505	0.725862	0.3833	0.999952	0.719431	0.341004	0.935122	0.995093	2981.5	303.1	1568.8	127.7	199.6	581.5	493.8	46.34	6.38	4.87	8.13	11.57		18.37	1380.2	1289.2	281.3
High	[K].VYDTPGPCPSVSVK.[E]	1xCarbamidomethyl [C8]; 1xTMTpro [K14]; 1xTMTpro [N-Term]	1.73758e-07	2.82963e-05	1	1	1	4	A2ASS6	A2ASS6 [31323-31336]	A2ASS6 1xCarbamidomethyl [C31330]	Titin OS=Mus musculus OX=10090 GN=Ttn PE=1 SV=1	0	2114.14	4.131	0.595	2.071	0.333	0.336	1.154	0.493369	0.601433	0.797927	0.049117	0.105999	0.790502	0.996109	0.999952	0.999996	0.457517	0.753785	0.997787	8803.4	1268.6	4413.5	709.4	716.3	2130.9	2458.3	44.79	3.7	5.72	3	3.7		7.73	4025.8	3853.3	1155.1
High	[K].VYDTPGPCPSVSVKEVSR.[D]	1xCarbamidomethyl [C8]; 1xTMTpro [K14]; 1xTMTpro [N-Term]	1.49389e-08	2.82963e-05	1	1	1	1	A2ASS6	A2ASS6 [31323-31340]	A2ASS6 1xCarbamidomethyl [C31330]	Titin OS=Mus musculus OX=10090 GN=Ttn PE=1 SV=1	1	2585.39	3.188	0.277	2.925	0.186	0.197	0.577	0.228232	0.165362	0.285812	0.00439682	0.0255174	0.842349	0.942422	0.918091	0.967309	0.0971698	0.416639	0.997925	3350.4	291.1	3074.1	195	207	1050.8	605.9	45.88	4.03	1.6	2.44	11.4		6.02	1545.3	1454	251
High	[K].TVTTKCSKTLYR.[I]	1xCarbamidomethyl [C6]; 2xTMTpro [K5; K8]; 1xTMTpro [N-Term]	0.0146172	0.000942949	1	1	1	1	A2ASS6	A2ASS6 [31375-31386]	A2ASS6 1xCarbamidomethyl [C31380]	Titin OS=Mus musculus OX=10090 GN=Ttn PE=1 SV=1	2	2370.4	4.442	0.266	2.408	0.185	0.206	0.616	0.136962	0.129956	0.243263	0.022447	0.0589733	0.968594	0.840547	0.887734	0.945126	0.292692	0.599632	0.999948	3691	220.8	2000.9	153.5	170.9	830.9	511.9	46.54	7.67	7.1	0.05	13.79		7.92	1711.3	1593.5	206.8
High	[R].VLPENIYGIGEPCETSDAVLVSEVPLVPTK.[L]	1xCarbamidomethyl [C13]; 1xTMTpro [K30]; 1xTMTpro [N-Term]	1.11084e-08	2.82963e-05	1	1	1	2	A2ASS6	A2ASS6 [31400-31429]	A2ASS6 1xCarbamidomethyl [C31412]	Titin OS=Mus musculus OX=10090 GN=Ttn PE=1 SV=1	0	3834.07	2.1	0.271	3.36	0.094	0.134	0.422	0.364914	0.19822	0.340587	0.000151386	0.00554531	0.576549	0.993035	0.94626	0.984191	0.00778808	0.175339	0.995093	2665.1	344.4	4265.4	119.4	169.5	1269.3	536.3	54.64	4.06	2.46	6.14	4.85		7.02	1319.6	1077.4	314.4
High	[R].LTGYVLEACKAGTER.[W]	1xCarbamidomethyl [C9]; 1xTMTpro [K10]; 1xTMTpro [N-Term]	5.08389e-10	2.82963e-05	1	1	1	1	A2ASS6	A2ASS6 [31455-31469]	A2ASS6 1xCarbamidomethyl [C31463]	Titin OS=Mus musculus OX=10090 GN=Ttn PE=1 SV=1	1	2276.26	4.896	0.266	2.312	0.271	0.22	0.661	0.0971326	0.150278	0.15926	0.08547	0.0751832	0.963734	0.757427	0.907581	0.873721	0.602997	0.661927	0.999948	3729.1	202.6	1760.7	206.4	167.8	761.7	503.6	52.62	5.69	1.71	20.69	10.55		11.56	1815.8	1532.9	187.1
High	[R].FGIGSYLQSEVIECR.[S]	1xCarbamidomethyl [C14]; 1xTMTpro [N-Term]	4.85737e-10	2.82963e-05	1	1	1	2	A2ASS6	A2ASS6 [31701-31715]	A2ASS6 1xCarbamidomethyl [C31714]	Titin OS=Mus musculus OX=10090 GN=Ttn PE=1 SV=1	0	2062.06	1.827	0.325	4.827	0.047	0.063	0.315	0.28055	0.308575	0.196026	3.92139e-05	0.000299712	0.389758	0.968794	0.989613	0.909667	0.00268253	0.0248885	0.994122	1495.5	266.1	3951.2	38.5	51.8	818.6	257.9	62.16	6.26	2.37	65.04	15.52		13.77	789.5	567	246.7
High	[R].VAATNRFGIGSYLQSEVIECR.[S]	1xCarbamidomethyl [C20]; 1xTMTpro [N-Term]	1.04271e-05	2.82963e-05	1	1	1	1	A2ASS6	A2ASS6 [31695-31715]	A2ASS6 1xCarbamidomethyl [C31714]	Titin OS=Mus musculus OX=10090 GN=Ttn PE=1 SV=1	1	2674.39	3.759	0.537	4.44	0.517	0.367	1.174	0.0264091	0.504854	0.0259419	0.396514	0.271085	0.392933	0.419164	0.999596	0.483988	0.983048	0.965794	0.994122	1763.9	252	2083.1	242.5	172.4	469.2	551.1	43.69	5.82	11.07	0.58	2.18		4.5	799.7	778.8	214.5
High	[R].FRVLACNAGGPGEPAEVPGTVK.[V]	1xCarbamidomethyl [C6]; 1xTMTpro [K22]; 1xTMTpro [N-Term]	9.63122e-11	2.82963e-05	1	1	1	2	A2ASS6	A2ASS6 [31894-31915]	A2ASS6 1xCarbamidomethyl [C31899]	Titin OS=Mus musculus OX=10090 GN=Ttn PE=1 SV=1	1	2834.55	2.605	0.431	2.987	0.439	0.341	0.931	0.607812	0.43232	0.514376	0.152151	0.108556	0.814347	0.996109	0.999596	0.999526	0.766308	0.757662	0.997925	4636.2	766.9	5315.8	782	607.5	1779.7	1657	43.25	1.06	2.57	0.71	2.59		6.16	2094.7	2053.9	685.4
High	[R].VLACNAGGPGEPAEVPGTVK.[V]	1xCarbamidomethyl [C4]; 1xTMTpro [K20]; 1xTMTpro [N-Term]	1.18141e-09	2.82963e-05	1	1	1	4	A2ASS6	A2ASS6 [31896-31915]	A2ASS6 1xCarbamidomethyl [C31899]	Titin OS=Mus musculus OX=10090 GN=Ttn PE=1 SV=1	0	2531.38	1.938	0.27	3.423	0.099	0.126	0.453	0.844944	0.190701	0.464716	0.000245695	0.00158471	0.650206	0.999984	0.940837	0.999091	0.0111028	0.0834304	0.995093	4605.7	640.9	8133.4	236.2	298.6	2376.1	1076.8	54.3	8.84	5.42	19.01	9.95		11.58	2274.1	1867.1	605.3
High	[K].LGEAAQLSCQIVGR.[P]	1xCarbamidomethyl [C9]; 1xTMTpro [N-Term]	1.79561e-10	2.82963e-05	1	1	1	3	A2ASS6	A2ASS6 [32335-32348]	A2ASS6 1xCarbamidomethyl [C32343]	Titin OS=Mus musculus OX=10090 GN=Ttn PE=1 SV=1	0	1805.99	2.545	0.52	2.3	0.403	0.421	1.021	0.22518	0.574445	0.376913	0.16943	0.203444	0.606685	0.942061	0.999952	0.991802	0.799606	0.916953	0.995093	2786.3	569.3	2518.4	441.5	461.4	1094.9	1117.8	49.57	1	0.87	9.07	5.16		11.05	1323.5	1174.1	501.4
High	[K].LGEAAQLSCQIVGRPLPDIK.[W]	1xCarbamidomethyl [C9]; 1xTMTpro [K20]; 1xTMTpro [N-Term]	1.837e-10	2.82963e-05	1	1	1	2	A2ASS6	A2ASS6 [32335-32354]	A2ASS6 1xCarbamidomethyl [C32343]	Titin OS=Mus musculus OX=10090 GN=Ttn PE=1 SV=1	1	2773.59	2.108	0.222	2.617	0.122	0.16	0.451	0.891609	0.129229	0.71489	0.000200914	0.00674088	0.512518	0.999984	0.886628	0.999996	0.00967577	0.197446	0.994122	5665.4	596.5	7033.4	327.3	429.7	2687.7	1211.2	50.57	6.78	15.4	12.95	6.61		3.75	2712.9	2368.2	555.1
High	[K].EGAEWQLVSSAISVTTCR.[I]	1xCarbamidomethyl [C17]; 1xTMTpro [N-Term]	9.486e-11	2.82963e-05	1	1	1	2	A2ASS6	A2ASS6 [32556-32573]	A2ASS6 1xCarbamidomethyl [C32572]	Titin OS=Mus musculus OX=10090 GN=Ttn PE=1 SV=1	0	2298.17	2.106	0.4	4.126	0.129	0.206	0.605	0.299422	0.385769	0.22528	0.00169238	0.0652799	0.979453	0.975081	0.999289	0.933017	0.0480852	0.626604	0.999948	2100.7	398.4	4114.6	128.4	205.7	997.3	602.9	53.33	2.35	4.96	8.09	3.85		4.28	1028.9	858.5	347.6
High	[K].DSCVVAWKPPASDGGAK.[I]	1xCarbamidomethyl [C3]; 2xTMTpro [K8; K17]; 1xTMTpro [N-Term]	6.09564e-09	2.82963e-05	1	1	1	2	A2ASS6	A2ASS6 [32628-32644]	A2ASS6 1xCarbamidomethyl [C32630]	Titin OS=Mus musculus OX=10090 GN=Ttn PE=1 SV=1	1	2657.45	2.379	0.376	1.667	0.143	0.172	0.439	0.711369	0.372204	0.916496	0.000368817	0.00413361	0.54689	0.999058	0.996752	0.999996	0.0150995	0.147686	0.994655	5142.7	813.4	3604.9	308.6	371.6	2162.2	949.8	45.38	17.27	25.78	4.33	0.05		3.81	2362.6	2240.7	815.7
High	[R].FCAVISGRPQPK.[I]	1xCarbamidomethyl [C2]; 1xTMTpro [K12]; 1xTMTpro [N-Term]	2.63655e-06	2.82963e-05	1	1	1	1	A2ASS6	A2ASS6 [3264-3275]	A2ASS6 1xCarbamidomethyl [C3265]	Titin OS=Mus musculus OX=10090 GN=Ttn PE=1 SV=1	1	1968.13	1.765	0.138	3.062	0.081	0.093	0.178	0.315941	0.0258055	0.224857	0.000592216	0.00183964	0.0890012	0.981451	0.661367	0.933017	0.021634	0.0916125	0.836772	1466.6	114.3	2545	67.6	77.6	831.1	147.7	55.06	9.06	13.91	2.06	3.69		2	728.7	590.8	108.1
High	[K].CENLGGESEWSEISEPVTPK.[S]	1xCarbamidomethyl [C1]; 1xTMTpro [K20]; 1xTMTpro [N-Term]	2.1079e-11	2.82963e-05	1	1	1	1	A2ASS6	A2ASS6 [32690-32709]	A2ASS6 1xCarbamidomethyl [C32690]	Titin OS=Mus musculus OX=10090 GN=Ttn PE=1 SV=1	0	2856.42	3.256	0.425	1.346	0.287	0.393	0.862	0.0203185	0.160875	0.396792	0.0228542	0.21249	0.822079	0.363741	0.917533	0.994179	0.296204	0.924155	0.997925	771.6	100.8	319	67.9	93.1	237	204.4	73.29	5.38	17.23	0.39	5.92		18.58	451.2	264.1	86.1
High	[R].VKCENLGGESEWSEISEPVTPK.[S]	1xCarbamidomethyl [C3]; 2xTMTpro [K2; K22]; 1xTMTpro [N-Term]	4.75573e-12	2.82963e-05	1	1	1	2	A2ASS6	A2ASS6 [32688-32709]	A2ASS6 1xCarbamidomethyl [C32690]	Titin OS=Mus musculus OX=10090 GN=Ttn PE=1 SV=1	1	3387.79	1.986	0.191	2.25	0.062	0.099	0.434	0.926031	0.095473	0.856868	7.67837e-07	0.00188946	0.465875	0.999984	0.845967	0.999996	0.00012432	0.0926613	0.994122	5495.7	528.5	6228.4	172.5	273.7	2767.9	1200.1	56.46	16.22	23.91	46.27	22.01		5.54	2762.9	2188.1	526.1
High	[R].YQSNATLVCK.[V]	1xCarbamidomethyl [C9]; 1xTMTpro [K10]; 1xTMTpro [N-Term]	3.23677e-06	2.82963e-05	1	1	1	2	A2ASS6	A2ASS6 [32730-32739]	A2ASS6 1xCarbamidomethyl [C32738]	Titin OS=Mus musculus OX=10090 GN=Ttn PE=1 SV=1	0	1791.99	2.165	0.277	3.36	0.038	0.036	0.453	0.740872	0.159787	0.467547	2.2863e-08	3.16834e-06	0.572371	0.999984	0.916534	0.999091	7.92091e-06	0.000880033	0.995093	4511.4	577.2	7000.4	78.8	74.3	2083.4	944	56.05	7.21	12.56	60.27	55.57		7.83	2260.2	1802.4	538.8
High	[K].DAGFYVVCAK.[N]	1xCarbamidomethyl [C8]; 1xTMTpro [K10]; 1xTMTpro [N-Term]	1.19549e-05	2.82963e-05	1	1	1	1	A2ASS6	A2ASS6 [32884-32893]	A2ASS6 1xCarbamidomethyl [C32891]	Titin OS=Mus musculus OX=10090 GN=Ttn PE=1 SV=1	0	1737.95	2.178	0.109	3.07	0.072	0.114	0.185	0.237864	0.0139592	0.332333	0.000146621	0.00534063	0.134858	0.947859	0.575148	0.983442	0.00759504	0.171561	0.909669	2395.4	120.3	3375.8	79.1	125.9	1099.8	203	52.91	8.7	12.14	3.79	20.42			1169.2	982.3	113.5
High	[R].KDAGFYVVCAK.[N]	1xCarbamidomethyl [C9]; 2xTMTpro [K1; K11]; 1xTMTpro [N-Term]	7.54042e-09	2.82963e-05	1	1	1	3	A2ASS6	A2ASS6 [32883-32893]	A2ASS6 1xCarbamidomethyl [C32891]	Titin OS=Mus musculus OX=10090 GN=Ttn PE=1 SV=1	1	2170.25	1.409	0.322	2.831	0.208	0.17	0.407	0.76097	0.136308	0.636549	0.00517514	0.0113603	0.530246	0.999984	0.89249	0.999526	0.108275	0.264089	0.994122	5355.9	1223.7	10763	791.1	644.9	3801.5	1546.8	46.65	5.32	15.11	10.63	4.01		7.21	2485.3	2310.3	1127.2
High	[R].KDAGFYVVCAKNR.[F]	1xCarbamidomethyl [C9]; 2xTMTpro [K1; K11]; 1xTMTpro [N-Term]	0.0719708	0.00492009	1	1	1	1	A2ASS6	A2ASS6 [32883-32895]	A2ASS6 1xCarbamidomethyl [C32891]	Titin OS=Mus musculus OX=10090 GN=Ttn PE=1 SV=1	2	2440.4	2.371	0.659	1.713	0.701	0.561	1.06	0.19541	0.746977	0.442915	0.519689	0.431827	0.584418	0.912525	0.999952	0.999091	1	0.99991	0.995093	2474.3	687.7	1787.3	731.6	585.9	1043.6	1106.3	32.13	0.17	5.38	7.73	4.61		4.02	1027.1	1193.1	610.8
High	[K].CATTAER.[W]	1xCarbamidomethyl [C1]; 1xTMTpro [N-Term]	0.00588503	0.000397541	1	1	1	1	A2ASS6	A2ASS6 [32950-32956]	A2ASS6 1xCarbamidomethyl [C32950]	Titin OS=Mus musculus OX=10090 GN=Ttn PE=1 SV=1	0	1112.57	2.913	0.073	2.634	0.021	0.039	0.181	0.15146	0.000647302	0.210539	2.39057e-09	2.80003e-05	0.151243	0.862182	0.135429	0.921139	1.3513e-06	0.00474826	0.925548	2261.5	57	2044.8	16.7	30.5	776.3	140.3	77.33	31.3	10.79				37.98	1376.3	743.8	63.3
High	[R].DSVNLTWTEPASDGGSKVTNYIVEKCATTAER.[W]	1xCarbamidomethyl [C26]; 2xTMTpro [K17; K25]; 1xTMTpro [N-Term]	1.21686e-08	2.82963e-05	1	1	1	1	A2ASS6	A2ASS6 [32925-32956]	A2ASS6 1xCarbamidomethyl [C32950]	Titin OS=Mus musculus OX=10090 GN=Ttn PE=1 SV=1	2	4412.29	2.108	0.357	3.506	0.115	0.139	0.726	0.16088	0.277444	0.243073	0.0027011	0.0177336	0.856934	0.875297	0.975559	0.944973	0.0671111	0.343474	0.998045	1834.6	310.9	3050.5	100.1	121.2	870.2	632.2	50.74	12.32	14.52	9.72	8.64		25.19	879.7	765.8	301
High	[K].VTNYIVEKCATTAER.[W]	1xCarbamidomethyl [C9]; 1xTMTpro [K8]; 1xTMTpro [N-Term]	3.60892e-09	2.82963e-05	1	1	1	2	A2ASS6	A2ASS6 [32942-32956]	A2ASS6 1xCarbamidomethyl [C32950]	Titin OS=Mus musculus OX=10090 GN=Ttn PE=1 SV=1	1	2363.29	2.41	0.538	2.22	0.991	0.158	0.227	0.865817	0.390423	0.882732	0.693003	0.00293582	0.223906	0.999984	0.999596	0.999996	1	0.120962	0.975548	7063.3	1577.2	6507.5	2905.8	463.8	2931.3	665.2	47.54	5.42	5	6.05	11.62		80.12	3301	3025.2	1346.4
High	[R].CVETSSKR.[T]	1xCarbamidomethyl [C1]; 1xTMTpro [K7]; 1xTMTpro [N-Term]	0.0240366	0.00169995	1	1	1	1	A2ASS6	A2ASS6 [33057-33064]	A2ASS6 1xCarbamidomethyl [C33057]	Titin OS=Mus musculus OX=10090 GN=Ttn PE=1 SV=1	1	1574.88	0.781	0.218	3.692	0.139	0.112	0.107	0.911503	0.0815639	0.104012	0.0054524	0.00386662	0.0338257	0.999984	0.829749	0.783608	0.112397	0.141893	0.616439	469.6	130.9	2220.6	83.6	67.1	601.4	64.5	65.59	5.15	10.21	10.36	10.87		20.96	255.6	172.7	120.4
High	[R].ISCGGAIR.[S]	1xCarbamidomethyl [C3]; 1xTMTpro [N-Term]	0.000358532	2.82963e-05	1	1	1	1	A2ASS6	A2ASS6 [33332-33339]	A2ASS6 1xCarbamidomethyl [C33334]	Titin OS=Mus musculus OX=10090 GN=Ttn PE=1 SV=1	0	1137.64	1.18	0.143	4.943	0.091	0.044	0.082	0.422449	0.0273744	0.10193	0.000394531	7.88156e-06	0.0245409	0.996109	0.673912	0.780449	0.0159893	0.00181389	0.528228	699.9	84.6	2931.7	54.2	26.2	593.1	48.6	56.48	10.24	0.32		3.58			351.9	278.6	80.7
High	[K].FDDGTYRCK.[V]	1xCarbamidomethyl [C8]; 1xTMTpro [K9]; 1xTMTpro [N-Term]	0.05635	0.00404959	1	1	1	1	A2ASS6	A2ASS6 [33423-33431]	A2ASS6 1xCarbamidomethyl [C33430]	Titin OS=Mus musculus OX=10090 GN=Ttn PE=1 SV=1	1	1769.91	1.866	0.273	3.577	0.149	0.131	0.285	0.270298	0.187705	0.216187	0.0018615	0.0100221	0.322407	0.965783	0.937974	0.92595	0.0512191	0.245202	0.994122	1740.6	254.8	3336	138.5	121.9	932.6	265.8	53.75	4.65	13.44	11.13	3.43		11.64	855.5	708.9	233.6
High	[R].EVYDYYCR.[R]	1xCarbamidomethyl [C7]; 1xTMTpro [N-Term]	0.000456868	2.82963e-05	1	1	1	2	A2ASS6	A2ASS6 [33452-33459]	A2ASS6 1xCarbamidomethyl [C33458]	Titin OS=Mus musculus OX=10090 GN=Ttn PE=1 SV=1	0	1471.68	1.685	0.189	4.694	0.156	0.155	0.205	0.509662	0.0763652	0.256198	0.00221152	0.0113999	0.138578	0.996109	0.817438	0.951538	0.0582627	0.26482	0.911036	2422.4	271.4	6746.4	224.5	222.6	1437.3	294.9	56.63	0.01	2.5	32.83	12.16		11.18	1219.6	963.1	240.7
High	[K].HGEDSCK.[A]	1xCarbamidomethyl [C6]; 1xTMTpro [K7]; 1xTMTpro [N-Term]	0.000182577	2.82963e-05	1	1	1	3	A2ASS6	A2ASS6 [33559-33565]	A2ASS6 1xCarbamidomethyl [C33564]	Titin OS=Mus musculus OX=10090 GN=Ttn PE=1 SV=1	0	1440.74	1.31	0.139	1.837	0.053	0.047	0.188	0.445045	0.0235573	0.2142	7.31349e-06	6.74733e-05	0.147555	0.996109	0.645169	0.925307	0.000705511	0.00905829	0.919473	1153	121.9	1616.3	46.8	41.7	879.8	165.8	71.71	15.1	21.77	33.98	50.21		7.26	664.1	400.7	120.4
High	[R].NKHGEDSCK.[A]	1xCarbamidomethyl [C8]; 2xTMTpro [K2; K9]; 1xTMTpro [N-Term]	0.0274647	0.0019439	1	1	1	1	A2ASS6	A2ASS6 [33557-33565]	A2ASS6 1xCarbamidomethyl [C33564]	Titin OS=Mus musculus OX=10090 GN=Ttn PE=1 SV=1	1	1987.08	0.425	0.512	3.25	0.657	1.036	0.101	0.302049	0.648259	0.103416	0.680307	0.865111	0.0235759	0.97556	0.999952	0.783556	1	0.999916	0.518404	305.5	367.8	2334.2	472	743.9	718.1	72.7	44.34	4.81	18.01	15.72	11.29		19.4	139.2	134.2	337.5
High	[R].DTLPEDTGYYRVTATNTAGSTSCQAHLQVER.[L]	1xCarbamidomethyl [C23]; 1xTMTpro [N-Term]	4.0578e-13	2.82963e-05	1	1	1	1	A2ASS6	A2ASS6 [33645-33675]	A2ASS6 1xCarbamidomethyl [C33667]	Titin OS=Mus musculus OX=10090 GN=Ttn PE=1 SV=1	1	3745.8	1.304	1.021	3.085	0.717	0.589	1.18	0.316591	0.999467	0.0192706	0.69241	0.495566	0.463874	0.982135	0.999952	0.4266	1	0.99991	0.994122	129.3	101.3	305.9	71.1	58.4	99.2	117	41.43	0.6	11.3	7.98	14.29		6.77	57.6	58.1	90.2
High	[R].VTATNTAGSTSCQAHLQVER.[L]	1xCarbamidomethyl [C12]; 1xTMTpro [N-Term]	2.74259e-17	2.82963e-05	1	1	1	19	A2ASS6	A2ASS6 [33656-33675]	A2ASS6 1xCarbamidomethyl [C33667]	Titin OS=Mus musculus OX=10090 GN=Ttn PE=1 SV=1	0	2435.23	1.318	0.909	4.527	0.423	0.366	0.98	0.986909	0.843792	0.266111	0.128568	0.141033	0.818677	0.999984	0.999952	0.956346	0.719925	0.826445	0.997925	2887.1	1990.7	9915	925.8	801	2190	2145.7	40.73	4.56	8.66	5.82	4.93		11.17	1279.2	1304.3	1709.8
High	[R].VTATNTAGSTSCQAHLQVERLR.[Y]	1xCarbamidomethyl [C12]; 1xTMTpro [N-Term]	1.88902e-07	2.82963e-05	1	1	1	8	A2ASS6	A2ASS6 [33656-33677]	A2ASS6 1xCarbamidomethyl [C33667]	Titin OS=Mus musculus OX=10090 GN=Ttn PE=1 SV=1	1	2704.41	1.228	1.09	3.327	0.737	0.857	1.492	0.490451	0.736014	0.103853	0.814137	0.959471	0.326559	0.996109	0.999952	0.783608	1	0.99999	0.994122	856.7	760.6	2321.5	514.4	597.7	697.8	1041.3	14.59	0.88	11.56	0.53	6.9		3.18	313	469.4	670.5
High	[R].FQCQVSGTDLK.[V]	1xCarbamidomethyl [C3]; 1xTMTpro [K11]; 1xTMTpro [N-Term]	8.12887e-08	2.82963e-05	1	1	1	2	A2ASS6	A2ASS6 [3370-3380]	A2ASS6 1xCarbamidomethyl [C3372]	Titin OS=Mus musculus OX=10090 GN=Ttn PE=1 SV=1	0	1891.02	1.784	0.438	2.471	0.162	0.153	0.357	0.330539	0.46609	0.34198	0.0101213	0.0256428	0.454952	0.986771	0.999596	0.984434	0.173882	0.4177	0.994122	1780.7	437.7	2467.2	162	152.7	998.3	356.7	50.36	4.24	14.58	0.17	13.4		6.28	851.3	745.6	400.1
High	[R].SHRVPCGQNTR.[F]	1xCarbamidomethyl [C6]; 1xTMTpro [N-Term]	1.06675e-05	2.82963e-05	1	1	1	10	A2ASS6	A2ASS6 [34171-34181]	A2ASS6 1xCarbamidomethyl [C34176]	Titin OS=Mus musculus OX=10090 GN=Ttn PE=1 SV=1	1	1615.84	0.843	0.897	4.418	0.557	0.489	0.316	0.86135	0.823405	0.122368	0.498285	0.536697	0.471391	0.999984	0.999952	0.820912	1	0.99991	0.994122	556.6	592	2916.8	367.9	322.8	660.3	208.9	14.34	2.63	6.09	17.02	0.69		14.08	203	305.5	515.5
High	[K].IHYTNTSGVLTLEILDCQTEDGGTYR.[A]	1xCarbamidomethyl [C17]; 1xTMTpro [N-Term]	1.32836e-13	2.82963e-05	1	1	1	2	A2ASS6	A2ASS6 [34209-34234]	A2ASS6 1xCarbamidomethyl [C34225]	Titin OS=Mus musculus OX=10090 GN=Ttn PE=1 SV=1	0	3260.61	1.348	1.045	2.395	0.749	0.806	2.76	0.327692	0.74741	0.0583486	0.82196	0.954565	0.125482	0.985849	0.999952	0.664375	1	0.99999	0.899127	739.7	573.4	1314.7	411.2	442.7	548.9	1515.3	20.26	6.88	7.96	3.29	8.11		1.51	281.5	389.1	484.5
High	[R].AVCTNYK.[G]	1xCarbamidomethyl [C3]; 1xTMTpro [K7]; 1xTMTpro [N-Term]	0.00162307	9.06176e-05	1	1	1	1	A2ASS6	A2ASS6 [34235-34241]	A2ASS6 1xCarbamidomethyl [C34237]	Titin OS=Mus musculus OX=10090 GN=Ttn PE=1 SV=1	0	1463.82	0.245	0.085	2.921	0.033	0.022	0.031	0.103433	0.00471714	0.262282	8.25872e-07	1.05743e-07	0.00057249	0.77531	0.37435	0.955488	0.000132386	7.24901e-05	0.0516684	213.8	74.1	2549.7	28.4	19.5	872.8	27	21.69	11.06	10.28		3.2			82.2	111.3	71.1
High	[R].FSCDTDGEPVPTVTWLR.[E]	1xCarbamidomethyl [C3]; 1xTMTpro [N-Term]	1.13738e-09	2.82963e-05	1	1	1	2	A2ASS6	A2ASS6 [34369-34385]	A2ASS6 1xCarbamidomethyl [C34371]	Titin OS=Mus musculus OX=10090 GN=Ttn PE=1 SV=1	0	2284.12	0.696	0.417	3.72	0.23	0.229	0.466	0.755352	0.344336	0.394626	0.0163033	0.0242627	0.53126	0.999984	0.993373	0.994008	0.237796	0.406546	0.994122	1186.9	711.1	6347.5	392.2	391	1706.3	794.5	35.63	8.85	1.46	15.45	9.1		2.67	505.8	557.5	592.5
High	[R].FSCDTDGEPVPTVTWLREGQVVSTSAR.[H]	1xCarbamidomethyl [C3]; 1xTMTpro [N-Term]	1.98036e-09	2.82963e-05	1	1	1	1	A2ASS6	A2ASS6 [34369-34395]	A2ASS6 1xCarbamidomethyl [C34371]	Titin OS=Mus musculus OX=10090 GN=Ttn PE=1 SV=1	1	3298.63	0.356	0.474	5.386	0.264	0.21	1	0.271893	0.519639	0.112348	0.0469751	0.0570951	0.473849	0.965783	0.999952	0.802954	0.44754	0.591512	0.994122	233.7	311.3	3537.4	173.4	138	656.8	656.9	24.95	2.26	3.37	19.02	9.14		9.79	92	118.8	280.6
High	[R].SITVHEGESARFSCDTDGEPVPTVTWLR.[E]	1xCarbamidomethyl [C14]; 1xTMTpro [N-Term]	1.80782e-09	2.82963e-05	1	1	1	1	A2ASS6	A2ASS6 [34358-34385]	A2ASS6 1xCarbamidomethyl [C34371]	Titin OS=Mus musculus OX=10090 GN=Ttn PE=1 SV=1	1	3450.69	0.717	0.763	7.751	0.349	0.582	0.462	0.863351	0.733001	0.00021167	0.111672	0.55074	0.654537	0.999984	0.999952	0.0408384	0.678048	0.99991	0.995093	127.9	136.1	1382.8	62.3	103.9	178.4	82.4	4.14	0.13	12.01	1.56	19.07		33.26	43.4	75.5	120.8
High	[K].CQFDLTLSEELSDAPSFITQPR.[S]	1xCarbamidomethyl [C1]; 1xTMTpro [N-Term]	2.04482e-11	2.82963e-05	1	1	1	1	A2ASS6	A2ASS6 [34909-34930]	A2ASS6 1xCarbamidomethyl [C34909]	Titin OS=Mus musculus OX=10090 GN=Ttn PE=1 SV=1	0	2858.42	0.523	0.322	2.605	0.16	0.181	0.409	0.572653	0.0956102	0.0610404	0.00589313	0.00884265	0.462023	0.996109	0.846368	0.672407	0.118599	0.232151	0.994122	176.2	108.5	878.2	54.1	61.1	337.1	137.8	54.18	0.53	12.04	2.79	19.62		9.41	86.9	71.5	96.6
High	[K].TSQGVVKCQFDLTLSEELSDAPSFITQPR.[S]	1xCarbamidomethyl [C8]; 1xTMTpro [K7]; 1xTMTpro [N-Term]	2.00571e-06	2.82963e-05	1	1	1	1	A2ASS6	A2ASS6 [34902-34930]	A2ASS6 1xCarbamidomethyl [C34909]	Titin OS=Mus musculus OX=10090 GN=Ttn PE=1 SV=1	1	3862.02	0.958	0.887	1.762	0.688	1.054	2.217	0.667643	0.876972	0.19402	0.517283	0.727675	0.196112	0.996109	0.999952	0.908826	1	0.99991	0.960439	176.8	163.7	325.3	127	194.5	184.6	409.4	17.78	0.18	4.35	11.43	5.78		0.34	66.1	94.7	145
High	[R].SQNINEGQNVLFSCEVSGEPSPEIEWFK.[N]	1xCarbamidomethyl [C14]; 1xTMTpro [K28]; 1xTMTpro [N-Term]	4.50574e-11	2.82963e-05	1	1	1	1	A2ASS6	A2ASS6 [34931-34958]	A2ASS6 1xCarbamidomethyl [C34944]	Titin OS=Mus musculus OX=10090 GN=Ttn PE=1 SV=1	0	3832.9	0.553	0.247	2.275	0.179	0.191	0.383	0.572974	0.107065	0.126181	0.00757038	0.0350179	0.545188	0.996109	0.861579	0.826344	0.140911	0.483823	0.994655	363.9	162.4	1497	117.5	125.6	658	252.2	41.12	7.77	19.8	1.92	4.17		0.57	161.7	163.9	152.2
High	[K].NFHGQCSATASLTVLPLVEEPPR.[E]	1xCarbamidomethyl [C6]; 1xTMTpro [N-Term]	3.99662e-13	2.82963e-05	1	1	1	1	A2ASS6	A2ASS6 [34999-35021]	A2ASS6 1xCarbamidomethyl [C35004]	Titin OS=Mus musculus OX=10090 GN=Ttn PE=1 SV=1	0	2827.47	1	0.802	2.261	0.495	0.802	1.296	0.597637	0.77472	0.100991	0.20563	0.909081	0.401279	0.996109	0.999952	0.780142	0.847774	0.999916	0.994122	209.6	168	473.8	103.8	168.1	209.5	271.6	11.86	0.11	6.26	1.04	1.86		0.88	75.1	117.1	148.9
High	[K].LSVTVTGCPKPK.[I]	1xCarbamidomethyl [C8]; 2xTMTpro [K10; K12]; 1xTMTpro [N-Term]	9.53482e-08	2.82963e-05	1	1	1	1	A2ASS6	A2ASS6 [3528-3539]	A2ASS6 1xCarbamidomethyl [C3535]	Titin OS=Mus musculus OX=10090 GN=Ttn PE=1 SV=1	1	2199.34	0.084	0.181	3.14	0.089	0.055	0.087	0.000893273	0.0723682	0.462491	2.53014e-05	1.8301e-05	0.0102213	0.0532476	0.80973	0.999091	0.00190079	0.00342824	0.34998	126.4	274	4749.4	135.1	83.5	1512.8	131.2	11.44	15.97	22.58	19.19	4.24		20.71	38.4	83.3	272.2
High	[R].FQDEGEYTCLASNEYGK.[A]	1xCarbamidomethyl [C9]; 1xTMTpro [K17]; 1xTMTpro [N-Term]	5.93657e-05	2.82963e-05	1	1	1	1	A2ASS6	A2ASS6 [3573-3589]	A2ASS6 1xCarbamidomethyl [C3581]	Titin OS=Mus musculus OX=10090 GN=Ttn PE=1 SV=1	0	2619.25	0.725	1.185	1.65	0.789	1.049	1.863	0.832412	0.754765	0.210256	0.778084	0.683071	0.258298	0.999984	0.999952	0.921139	1	0.99991	0.994122	130.8	213.7	297.5	142.3	189.2	180.3	336	4.86	2.56	1.52	7.09	4.07		23.88	44.6	76.8	186.2
High	[K].AVCSAHLR.[I]	1xCarbamidomethyl [C3]; 1xTMTpro [N-Term]	0.000174452	2.82963e-05	1	1	1	3	A2ASS6	A2ASS6 [3590-3597]	A2ASS6 1xCarbamidomethyl [C3592]	Titin OS=Mus musculus OX=10090 GN=Ttn PE=1 SV=1	0	1217.67	0.106	0.314	7.89	0.112	0.121	0.135	0.00886616	0.223144	0.0587669	0.000559805	0.00538895	0.102084	0.222913	0.957303	0.664375	0.0206609	0.172768	0.855345	67.6	201.1	5050.4	71.4	77.2	640.1	86.5	6.21	0.32	9.93	46.35	3.38		18.66	21.3	42.9	178.8
High	[K].EDMPLYTSVCYTIIHSPDGSGTFIVNDPQR.[G]	1xCarbamidomethyl [C10]; 1xTMTpro [N-Term]	4.22964e-08	2.82963e-05	1	1	1	1	A2ASS6	A2ASS6 [3661-3690]	A2ASS6 1xCarbamidomethyl [C3670]	Titin OS=Mus musculus OX=10090 GN=Ttn PE=1 SV=1	0	3716.79	1.012	0.834	1.726	0.747	0.75	2.51	0.588673	0.878433	0.156754	0.655461	0.680759	0.0602392	0.996109	0.999952	0.868847	1	0.99991	0.762067	277.2	228.4	472.8	204.6	205.4	274	687.8	15.19	3.45	6.16	3.06	0.44		2.99	101.7	151.2	207.6
High	[R].GDSGLYLCK.[A]	1xCarbamidomethyl [C8]; 1xTMTpro [K9]; 1xTMTpro [N-Term]	2.73597e-05	2.82963e-05	1	1	1	3	A2ASS6	A2ASS6 [3691-3699]	A2ASS6 1xCarbamidomethyl [C3698]	Titin OS=Mus musculus OX=10090 GN=Ttn PE=1 SV=1	0	1620.89	0.146	0.256	4.696	0.152	0.137	0.184	0.0101163	0.144005	0.245314	0.00161266	0.00406457	0.0907201	0.241801	0.900885	0.946022	0.0464247	0.14693	0.841152	282.6	494.7	9070	294.5	265.5	1931.5	354.8	9.11	4.37	1.23	38.94	4.52		1.11	99.3	161	425.5
High	[R].ALLLSQSLAEGCVESLEVPDVAVSNMR.[S]	1xCarbamidomethyl [C12]; 1xTMTpro [N-Term]	5.45257e-12	2.82963e-05	1	1	1	2	A2ASS6	A2ASS6 [3925-3951]	A2ASS6 1xCarbamidomethyl [C3936]	Titin OS=Mus musculus OX=10090 GN=Ttn PE=1 SV=1	0	3191.66	1.02	0.706	2.797	0.51	0.564	0.46	0.715346	0.929903	0.201489	0.381241	0.622044	0.769629	0.999058	0.999952	0.917867	0.975631	0.99991	0.996886	770.3	533.1	2113.1	385.2	426.3	755.5	347.5	5.02	2.53	1.64	3.84	2.96		22.37	244.9	485	464.5
High	[R].SEPQVPFQHTCTEGK.[I]	1xCarbamidomethyl [C11]; 1xTMTpro [K15]; 1xTMTpro [N-Term]	4.66866e-08	2.82963e-05	1	1	1	1	A2ASS6	A2ASS6 [3952-3966]	A2ASS6 1xCarbamidomethyl [C3962]	Titin OS=Mus musculus OX=10090 GN=Ttn PE=1 SV=1	0	2353.21	0.083	0.274	2.824	0.108	0.068	0.107	0.000819904	0.165567	0.315214	0.000704804	0.000416931	0.0202525	0.0497501	0.918091	0.981519	0.0246032	0.0316083	0.478049	91.6	301.6	3113	118.7	74.9	1102.4	117.6	5.61	14.37	21.52	10.03	2.18		4.28	31.4	53.5	296.3
High	[K].FTCEIQGAPNVR.[F]	1xCarbamidomethyl [C3]; 1xTMTpro [N-Term]	2.91021e-06	2.82963e-05	1	1	1	1	A2ASS6	A2ASS6 [4363-4374]	A2ASS6 1xCarbamidomethyl [C4365]	Titin OS=Mus musculus OX=10090 GN=Ttn PE=1 SV=1	0	1695.88	3.418	0.329	3.626	0.2	0.167	0.333	0.00678516	0.0390799	0.0098424	0.00609347	0.00229872	0.351444	0.191242	0.734906	0.310296	0.121267	0.104706	0.994122	372.8	35.9	395.4	21.8	18.2	109.1	36.3	57.52	2.59	4.87	12.24	5.16			189.1	147.1	32.4
High	[R].EIYESDKCSIR.[S]	1xCarbamidomethyl [C8]; 1xTMTpro [K7]; 1xTMTpro [N-Term]	9.16393e-06	2.82963e-05	1	1	1	1	A2ASS6	A2ASS6 [4383-4393]	A2ASS6 1xCarbamidomethyl [C4390]	Titin OS=Mus musculus OX=10090 GN=Ttn PE=1 SV=1	1	2008.07	1.733	0.204	3.048	0.12	0.12	0.21	0.144195	0.0110343	0.0149808	0.000167539	0.00135934	0.166058	0.852976	0.529058	0.375043	0.00838214	0.0746275	0.940219	450.3	52.9	792.2	31.1	31.3	259.9	54.6	55.73	1.05	13.72	4.8	8.54		16.29	225	180.4	46.6
High	[R].EIYESDKCSIRSSNYVSSLEILR.[T]	1xCarbamidomethyl [C8]; 1xTMTpro [K7]; 1xTMTpro [N-Term]	0.000637345	2.82963e-05	1	1	1	1	A2ASS6	A2ASS6 [4383-4405]	A2ASS6 1xCarbamidomethyl [C4390]	Titin OS=Mus musculus OX=10090 GN=Ttn PE=1 SV=1	2	3356.77	2.608	0.759	2.393	0.374	0.584	1.036	0.0462951	0.737353	0.0561543	0.0829621	0.505365	0.649385	0.549605	0.999952	0.654603	0.595535	0.99991	0.995093	656.9	191.2	602.9	94.2	147.1	251.9	260.9	30.64	1.43	4.08	12.99	11.82		2.09	269.7	320.3	167.9
High	[K].DGAALSPSPDCR.[V]	1xCarbamidomethyl [C11]; 1xTMTpro [N-Term]	5.8588e-07	2.82963e-05	1	1	1	1	A2ASS6	A2ASS6 [4475-4486]	A2ASS6 1xCarbamidomethyl [C4485]	Titin OS=Mus musculus OX=10090 GN=Ttn PE=1 SV=1	0	1549.76	9.6	0.345	0.527	0.365	0.174	2.239	0.00100126	0.147655	0.526377	0.107302	0.00814644	0.12058	0.0570985	0.904916	0.999526	0.669978	0.219891	0.893379	3190.4	114.5	175.2	121.4	58	332.3	744.1	53.27	11.28	1.1	11.21			15.26	1561.8	1304.5	93.8
High	[K].IHLECQVDEDR.[K]	1xCarbamidomethyl [C5]; 1xTMTpro [N-Term]	9.66439e-06	2.82963e-05	1	1	1	1	A2ASS6	A2ASS6 [4549-4559]	A2ASS6 1xCarbamidomethyl [C4553]	Titin OS=Mus musculus OX=10090 GN=Ttn PE=1 SV=1	0	1717.85	1.447	0.094	0.665	2.872	0.1	0.211	0.279885	0.000897656	0.932111	0.0722778	0.000877836	0.190448	0.968226	0.164508	0.999996	0.558865	0.0548137	0.956358	793.6	51.7	364.9	1575.4	54.9	548.4	115.7	56.64	16.17	39.34	15.47	6.99		21.1	399.6	315.5	40.9
High	[K].IHLECQVDEDRK.[V]	1xCarbamidomethyl [C5]; 1xTMTpro [K12]; 1xTMTpro [N-Term]	1.52444e-05	2.82963e-05	1	1	1	2	A2ASS6	A2ASS6 [4549-4560]	A2ASS6 1xCarbamidomethyl [C4553]	Titin OS=Mus musculus OX=10090 GN=Ttn PE=1 SV=1	1	2150.15	5.192	1.371	0.432	1.202	0.236	0.744	0.105132	0.515473	0.510289	0.684668	0.0954302	0.803684	0.780317	0.999952	0.999526	1	0.72521	0.997925	4037.4	1065.7	335.5	934.4	183.5	777.6	578.2	60.9	15.57	0.35	10.58	25.94		31.53	2108.1	1547.7	1055.8
High	[K].DSGTYTCTASNEAGSSSSSAAVAVR.[E]	1xCarbamidomethyl [C7]; 1xTMTpro [N-Term]	1.7729e-13	2.82963e-05	1	1	1	1	A2ASS6	A2ASS6 [4598-4622]	A2ASS6 1xCarbamidomethyl [C4604]	Titin OS=Mus musculus OX=10090 GN=Ttn PE=1 SV=1	0	2740.27	4.073	0.847	1.649	0.557	0.64	2.172	0.000748553	0.60542	0.234907	0.401501	0.487922	0.0716831	0.0468318	0.999952	0.939163	0.985929	0.99991	0.791014	114.7	23.9	46.5	15.7	18	28.2	61.2	57.95	10.56	6.39	20.21	26.45		9.89	58.4	45.1	22.8
High	[K].LKDSGTYTCTASNEAGSSSSSAAVAVR.[E]	1xCarbamidomethyl [C9]; 1xTMTpro [K2]; 1xTMTpro [N-Term]	5.67763e-15	2.82963e-05	1	1	1	1	A2ASS6	A2ASS6 [4596-4622]	A2ASS6 1xCarbamidomethyl [C4604]	Titin OS=Mus musculus OX=10090 GN=Ttn PE=1 SV=1	1	3285.65	5.616	0.233	1.016	0.064	0.123	0.9	0.00438819	0.0277434	0.653751	2.24873e-07	0.000412914	0.686872	0.147125	0.674933	0.999996	4.7048e-05	0.0316083	0.995093	1820.2	75.6	329.2	20.9	40	324.1	291.8	58.52	13.57	8.6	2.61	44.18		23.36	931.2	712.2	73.8
High	[K].YTCLAENEAGSQTSVGELIVK.[E]	1xCarbamidomethyl [C3]; 1xTMTpro [K21]; 1xTMTpro [N-Term]	1.66153e-08	2.82963e-05	1	1	1	1	A2ASS6	A2ASS6 [4882-4902]	A2ASS6 1xCarbamidomethyl [C4884]	Titin OS=Mus musculus OX=10090 GN=Ttn PE=1 SV=1	0	2877.52	5.84	0.648	0.804	0.52	0.636	2.662	0.00426182	0.631725	0.890912	0.413573	0.663972	0.056365	0.14487	0.999952	0.999996	0.989772	0.99991	0.744906	2106.6	233.9	289.9	187.5	229.6	360.7	960.2	54.61	7.33	11.05	2.34	2.58		15.28	1042.8	851.8	197
High	[R].NVDSVVGGACR.[L]	1xCarbamidomethyl [C10]; 1xTMTpro [N-Term]	5.0232e-05	2.82963e-05	1	1	1	1	A2ASS6	A2ASS6 [5009-5019]	A2ASS6 1xCarbamidomethyl [C5018]	Titin OS=Mus musculus OX=10090 GN=Ttn PE=1 SV=1	0	1437.74	10.367	0.295	0.753	0.45	0.403	1.766	0.0102069	0.0925548	0.977049	0.281054	0.243151	0.206254	0.24289	0.842678	0.999996	0.924891	0.948562	0.96743	4015.6	114.3	291.6	174.2	156	387.3	684	64.3	1.83	20.49	16.82	6.87		1.14	2160.4	1494	100.1
High	[R].VDMNDAGNFTCR.[A]	1xCarbamidomethyl [C11]; 1xTMTpro [N-Term]	1.88902e-07	2.82963e-05	1	1	1	1	A2ASS6	A2ASS6 [5063-5074]	A2ASS6 1xCarbamidomethyl [C5073]	Titin OS=Mus musculus OX=10090 GN=Ttn PE=1 SV=1	0	1703.78	9.058	0.159	0.534	0.138	0.19	0.684	0.00528625	0.00291573	0.453629	0.000591298	0.00578472	0.977318	0.163615	0.296356	0.999091	0.021625	0.180055	0.999948	2805.1	49.2	165.5	42.9	59	309.7	211.8	62.85	1.08	4.86	1.22	20.77		34.45	1489.9	1057.1	44
High	[R].DVLPGSAVCLK.[S]	1xCarbamidomethyl [C9]; 1xTMTpro [K11]; 1xTMTpro [N-Term]	1.373e-07	2.82963e-05	1	1	1	1	A2ASS6	A2ASS6 [5104-5114]	A2ASS6 1xCarbamidomethyl [C5112]	Titin OS=Mus musculus OX=10090 GN=Ttn PE=1 SV=1	0	1767.03	6.525	0.436	0.783	0.497	0.552	0.964	0.0280295	0.392462	0.83014	0.348431	0.598132	0.520856	0.431724	0.999596	0.999996	0.960986	0.99991	0.994122	3208.2	214.6	385.1	244.4	271.6	491.6	473.9	56.54	2.21	1.96	9.26	3.42		10.43	1613.9	1276.5	187.4
High	[K].ELVSGGSCYITK.[E]	1xCarbamidomethyl [C8]; 1xTMTpro [K12]; 1xTMTpro [N-Term]	9.57805e-05	2.82963e-05	1	1	1	1	A2ASS6	A2ASS6 [5133-5144]	A2ASS6 1xCarbamidomethyl [C5140]	Titin OS=Mus musculus OX=10090 GN=Ttn PE=1 SV=1	0	1922.05	4.028	1.595	1.213	0.781	0.808	1.202	0.00546325	0.369517	0.488807	0.816534	0.94893	0.538768	0.16757	0.996752	0.999091	1	0.99999	0.994417	823.4	326.1	248	159.7	165.3	204.4	245.6	60.65	10.98	1.4	5.17	5.49		6.92	429	316.3	267.6
High	[K].TSDSGTYTCK.[V]	1xCarbamidomethyl [C9]; 1xTMTpro [K10]; 1xTMTpro [N-Term]	5.89166e-05	2.82963e-05	1	1	1	1	A2ASS6	A2ASS6 [5158-5167]	A2ASS6 1xCarbamidomethyl [C5166]	Titin OS=Mus musculus OX=10090 GN=Ttn PE=1 SV=1	0	1727.88	8.57	0.3	0.333	0.115	0.233	0.634	0.00054632	0.0328758	0.142611	0.000268989	0.020904	0.900031	0.0371491	0.700724	0.849992	0.011926	0.376903	0.998093	1913.4	66.9	74.4	25.7	52.1	223.3	141.6	74.41	9.47	29.13	5.97	21.43		50.71	1131.2	647.8	63.5
High	[K].VSNVAGSVECSADLFVK.[E]	1xCarbamidomethyl [C10]; 1xTMTpro [K17]; 1xTMTpro [N-Term]	5.98876e-06	2.82963e-05	1	1	1	1	A2ASS6	A2ASS6 [5168-5184]	A2ASS6 1xCarbamidomethyl [C5177]	Titin OS=Mus musculus OX=10090 GN=Ttn PE=1 SV=1	0	2390.29	3.281	1.227	1.361	1.094	1.211	1.704	0.0160329	0.669326	0.381242	0.819741	0.63195	0.254289	0.31692	0.999952	0.991802	1	0.99991	0.994088	658.5	246.3	273.1	219.5	243.1	200.7	342	32.55	6.42	7.61	2.9	6.78		3.91	274.2	316.5	208.8
High	[K].FVAADAGEYQCR.[V]	1xCarbamidomethyl [C11]; 1xTMTpro [N-Term]	2.24779e-06	2.82963e-05	1	1	1	1	A2ASS6	A2ASS6 [5343-5354]	A2ASS6 1xCarbamidomethyl [C5353]	Titin OS=Mus musculus OX=10090 GN=Ttn PE=1 SV=1	0	1690.82	2.577	1.231	1.74	1.145	1.017	0.934	0.041553	0.681027	0.17776	0.631882	0.721432	0.630255	0.527857	0.999952	0.891567	1	0.99991	0.995093	337	161	227.5	149.7	133	130.8	122.1	33.55	11.98	12.91	6.48	5.58		16.23	141.4	160.8	131.2
High	[R].VTNEVGSSTCSAR.[V]	1xCarbamidomethyl [C10]; 1xTMTpro [N-Term]	6.58214e-10	2.82963e-05	1	1	1	1	A2ASS6	A2ASS6 [5355-5367]	A2ASS6 1xCarbamidomethyl [C5364]	Titin OS=Mus musculus OX=10090 GN=Ttn PE=1 SV=1	0	1671.83	9.568	0.063	0.48	0.056	0.149	0.5	0.0237973	2.7862e-05	0.522481	1.12479e-07	0.00397562	0.784475	0.395256	0.0133987	0.999526	2.72276e-05	0.144903	0.997212	4146.8	27.5	208.1	24.1	64.7	433.4	216.9	59.32	21.65	8.31	27.24				2135.9	1611.5	20.9
High	[K].AADSGTYICQLSNDVGTTSSK.[A]	1xCarbamidomethyl [C9]; 1xTMTpro [K21]; 1xTMTpro [N-Term]	1.07937e-10	2.82963e-05	1	1	1	2	A2ASS6	A2ASS6 [5720-5740]	A2ASS6 1xCarbamidomethyl [C5728]	Titin OS=Mus musculus OX=10090 GN=Ttn PE=1 SV=1	0	2783.4	6.818	0.624	0.854	0.393	0.391	1.322	0.132673	0.768186	0.826517	0.220735	0.294112	0.398608	0.832148	0.999952	0.999996	0.866797	0.978463	0.994122	5041.3	461.2	631.3	290.5	289.2	739.4	977.5	50.73	1.39	6.53	0.57	4.62		4.58	2417.2	2104.5	413.2
High	[R].VENSGTYVCEAR.[N]	1xCarbamidomethyl [C9]; 1xTMTpro [N-Term]	2.52325e-08	2.82963e-05	1	1	1	1	A2ASS6	A2ASS6 [5814-5825]	A2ASS6 1xCarbamidomethyl [C5822]	Titin OS=Mus musculus OX=10090 GN=Ttn PE=1 SV=1	0	1688.82	10.055	0.102	0.405	0.073	0.195	0.38	0.0168742	0.000509562	0.245048	2.04634e-06	0.00527419	0.501255	0.325018	0.11562	0.946022	0.000262681	0.171132	0.994122	4109.6	41.7	165.3	29.8	79.8	408.7	155.2	60.82	0.79	2.5	0.79				2144.3	1576.5	37.2
High	[K].SVDVTEKDPVTLECVVAGTPELK.[V]	1xCarbamidomethyl [C14]; 2xTMTpro [K7; K23]; 1xTMTpro [N-Term]	1.86512e-10	2.82963e-05	1	1	1	1	A2ASS6	A2ASS6 [6037-6059]	A2ASS6 1xCarbamidomethyl [C6050]	Titin OS=Mus musculus OX=10090 GN=Ttn PE=1 SV=1	1	3398.89	9.04	0.156	0.523	0.167	0.199	1.497	0.10826	0.0347845	0.586913	0.0184093	0.0495481	0.359063	0.788459	0.711592	0.999526	0.258337	0.557747	0.994122	7615.9	131.3	440.7	140.6	167.4	842.5	1261.5	53.68	1.45	12.18	11.54	34.24		3.97	3741.1	3103.3	117.7
High	[K].VENDFGSSSCDAYLR.[V]	1xCarbamidomethyl [C10]; 1xTMTpro [N-Term]	1.16264e-08	2.82963e-05	1	1	1	1	A2ASS6	A2ASS6 [6103-6117]	A2ASS6 1xCarbamidomethyl [C6112]	Titin OS=Mus musculus OX=10090 GN=Ttn PE=1 SV=1	0	2023.94	7.813	0.619	0.644	0.341	0.432	1.574	0.00507912	0.715195	0.858154	0.0788788	0.316804	0.206699	0.159037	0.999952	0.999996	0.582048	0.983873	0.96743	3066.6	242.8	252.9	133.8	169.6	392.5	617.7	62.26	3.97	8.16	2.72	1.48		9.14	1620.3	1161.7	221.5
High	[K].VSNVAGDNACSGILTVK.[E]	1xCarbamidomethyl [C10]; 1xTMTpro [K17]; 1xTMTpro [N-Term]	1.28227e-07	2.82963e-05	1	1	1	1	A2ASS6	A2ASS6 [6199-6215]	A2ASS6 1xCarbamidomethyl [C6208]	Titin OS=Mus musculus OX=10090 GN=Ttn PE=1 SV=1	0	2313.27	4.038	0.85	1.209	0.697	0.71	1.608	0.0262153	0.978115	0.439824	0.699526	0.844838	0.246503	0.41732	0.999952	0.999091	1	0.99991	0.989477	1535.4	323.3	459.8	265.1	269.8	380.2	611.2	49.72	3.3	5.25	2.81	11.53		5.8	730.2	646.2	280.2
High	[R].CNIVTTEK.[T]	1xCarbamidomethyl [C1]; 1xTMTpro [K8]; 1xTMTpro [N-Term]	0.000463839	2.82963e-05	1	1	1	1	A2ASS6	A2ASS6 [6920-6927]	A2ASS6 1xCarbamidomethyl [C6920]	Titin OS=Mus musculus OX=10090 GN=Ttn PE=1 SV=1	0	1572.89	6.529	0.582	0.989	0.754	0.486	1.38	0.00414397	0.446141	0.696014	0.744028	0.317768	0.437623	0.142496	0.999596	0.999996	1	0.984302	0.994122	1661.1	148	251.6	191.9	123.7	254.4	351.2	74.81	8.18	4.73	0.25	4.77		24.11	985.9	560.2	123.9
High	[K].GDAGHYSCEIENEAGR.[D]	1xCarbamidomethyl [C8]; 1xTMTpro [N-Term]	1.10153e-07	2.82963e-05	1	1	1	1	A2ASS6	A2ASS6 [6939-6954]	A2ASS6 1xCarbamidomethyl [C6946]	Titin OS=Mus musculus OX=10090 GN=Ttn PE=1 SV=1	0	2068.93	7.275	0.654	1.068	0.372	0.4	1.387	0.000528365	0.520177	0.646422	0.142938	0.170783	0.429365	0.036532	0.999952	0.999995	0.747398	0.878034	0.994122	1363.9	122.7	200.1	69.7	75	187.5	259.9	52.48	2.64	17.97	12.22	7.34		23.85	663.4	561.3	106.8
High	[K].DIEQTVGLPVTLTCR.[L]	1xCarbamidomethyl [C14]; 1xTMTpro [N-Term]	1.37526e-09	2.82963e-05	1	1	1	2	A2ASS6	A2ASS6 [7071-7085]	A2ASS6 1xCarbamidomethyl [C7084]	Titin OS=Mus musculus OX=10090 GN=Ttn PE=1 SV=1	0	2006.09	7.798	0.274	0.926	0.236	0.289	1.755	0.152722	0.227696	0.785374	0.0380132	0.103822	0.291125	0.865689	0.958252	0.999996	0.399083	0.747856	0.994122	7674.9	270.1	911.3	232.2	284.8	984.2	1727.5	56.19	4.75	2.45	9.78	16.97		22.94	3849.7	3062.7	231.7
High	[K].ILQTDLSHSGQYSCSASNPLGTASSTAR.[L]	1xCarbamidomethyl [C14]; 1xTMTpro [N-Term]	1.92741e-13	2.82963e-05	1	1	1	1	A2ASS6	A2ASS6 [7122-7149]	A2ASS6 1xCarbamidomethyl [C7135]	Titin OS=Mus musculus OX=10090 GN=Ttn PE=1 SV=1	0	3213.58	5.226	0.365	2.497	0.174	0.213	1.47	0.00239961	0.100191	0.0640397	0.00635134	0.0246432	0.412127	0.0999235	0.852879	0.682061	0.124902	0.410125	0.994122	994.1	69.5	474.9	33	40.4	190.2	279.7	64.25	9.72	7.2	1.81	11.88		17.48	534.6	370	66
High	[K].EIRPGGNYTITCVGNTPHLR.[I]	1xCarbamidomethyl [C12]; 1xTMTpro [N-Term]	1.78202e-10	2.82963e-05	1	1	1	3	A2ASS6	A2ASS6 [7198-7217]	A2ASS6 1xCarbamidomethyl [C7209]	Titin OS=Mus musculus OX=10090 GN=Ttn PE=1 SV=1	1	2559.34	6.879	0.296	1.451	0.163	0.259	1.089	0.162158	0.233765	0.380664	0.0156458	0.0716355	0.485305	0.876697	0.962729	0.991802	0.232267	0.651085	0.994122	5857.4	251.8	1235.7	138.4	220.5	851.4	927.3	49.75	2.4	4.34	4.81	11.95		9.38	2786.4	2464.6	227.2
High	[R].PGGNYTITCVGNTPHLR.[I]	1xCarbamidomethyl [C9]; 1xTMTpro [N-Term]	3.04847e-07	2.82963e-05	1	1	1	1	A2ASS6	A2ASS6 [7201-7217]	A2ASS6 1xCarbamidomethyl [C7209]	Titin OS=Mus musculus OX=10090 GN=Ttn PE=1 SV=1	0	2161.11	2.357	1.069	1.181	0.768	0.852	1.955	0.0554187	0.741438	0.454848	0.735358	0.972477	0.156605	0.596988	0.999952	0.999091	1	0.99999	0.931478	683.1	309.8	342.2	222.7	247.1	289.9	566.7	40.87	0.55	5.17	1.75	0.62		6.51	303	308.3	275.9
High	[K].GDSGQYTCQATNDVGK.[D]	1xCarbamidomethyl [C8]; 1xTMTpro [K16]; 1xTMTpro [N-Term]	1.08308e-05	2.82963e-05	1	1	1	1	A2ASS6	A2ASS6 [7224-7239]	A2ASS6 1xCarbamidomethyl [C7231]	Titin OS=Mus musculus OX=10090 GN=Ttn PE=1 SV=1	0	2309.13	5.244	1.488	1.979	0.952	0.886	2.743	0.00128016	0.500464	0.142694	0.81177	0.875563	0.0851253	0.0675809	0.999596	0.849992	1	0.999916	0.825131	366.7	104.1	138.4	66.6	61.9	69.9	191.8	57.77	5.8	16.46	15.41	11.06		1.44	186.4	144.4	88.6
High	[K].QGESIQLECK.[I]	1xCarbamidomethyl [C9]; 1xTMTpro [K10]; 1xTMTpro [N-Term]	3e-06	2.82963e-05	1	1	1	4	A2ASS6	A2ASS6 [7266-7275]	A2ASS6 1xCarbamidomethyl [C7274]	Titin OS=Mus musculus OX=10090 GN=Ttn PE=1 SV=1	0	1799.98	7.937	0.38	0.77	0.324	0.306	0.627	0.190246	0.368942	0.733397	0.0465738	0.0634377	0.89761	0.907299	0.996752	0.999996	0.445152	0.619216	0.998093	17235.2	825.8	1672.9	703.5	664.9	2171.6	1362	66.48	1.55	8.37	2.51	21.05		28.1	9456.7	6287.5	740.6
High	[K].GSDVILQCEISGTPPFEVVWVK.[D]	1xCarbamidomethyl [C8]; 1xTMTpro [K22]; 1xTMTpro [N-Term]	3.00992e-10	2.82963e-05	1	1	1	1	A2ASS6	A2ASS6 [7360-7381]	A2ASS6 1xCarbamidomethyl [C7367]	Titin OS=Mus musculus OX=10090 GN=Ttn PE=1 SV=1	0	3068.66	4.255	0.777	1.526	0.501	0.732	1.674	0.0247607	0.96771	0.255261	0.407582	0.885039	0.277401	0.404283	0.999952	0.951361	0.988187	0.999916	0.994122	1834.6	335.2	658.1	215.9	315.6	431.1	721.6	40.5	1.63	2.8	5.62	7		0.57	811.4	830.3	293.9
High	[K].YVCQIK.[N]	1xCarbamidomethyl [C3]; 1xTMTpro [K6]; 1xTMTpro [N-Term]	0.0478138	0.00333311	1	1	1	1	A2ASS6	A2ASS6 [7510-7515]	A2ASS6 1xCarbamidomethyl [C7512]	Titin OS=Mus musculus OX=10090 GN=Ttn PE=1 SV=1	0	1418.83	8.758	0.175	0.983	0.197	0.335	0.614	0.16029	0.0603998	0.706477	0.0262087	0.113245	0.975744	0.874164	0.779051	0.999996	0.319987	0.768156	0.999948	8707.8	174.2	977	196.1	332.7	994.3	610.6	57.08	4.65	12.54	3.74	16.83			4400.4	3449.1	159.7
High	[K].SSCTVSVHVSDR.[V]	1xCarbamidomethyl [C3]; 1xTMTpro [N-Term]	5.43469e-08	2.82963e-05	1	1	1	2	A2ASS6	A2ASS6 [7614-7625]	A2ASS6 1xCarbamidomethyl [C7616]	Titin OS=Mus musculus OX=10090 GN=Ttn PE=1 SV=1	0	1637.82	6.077	0.296	1.733	0.187	0.196	1.131	0.0048732	0.10308	0.161903	0.0151701	0.0101292	0.524733	0.156545	0.858517	0.876791	0.228402	0.245202	0.994122	1929.7	94.1	550.2	59.5	62.3	317.5	359.1	62.87	1.76	0.44	2.2	8.56		23.27	1025.1	727.1	82.4
High	[R].VGKSSCTVSVHVSDR.[V]	1xCarbamidomethyl [C6]; 1xTMTpro [K3]; 1xTMTpro [N-Term]	1.08581e-08	2.82963e-05	1	1	1	1	A2ASS6	A2ASS6 [7611-7625]	A2ASS6 1xCarbamidomethyl [C7616]	Titin OS=Mus musculus OX=10090 GN=Ttn PE=1 SV=1	1	2226.22	4.179	0.544	1.133	0.685	0.96	13.687	0.0119564	0.471865	0.487436	0.712855	0.782618	0.0403381	0.264949	0.999596	0.999091	1	0.99991	0.662772	1409.9	183.6	382.2	231.1	324	337.3	4617.3	32	10	8.11	25.29	17.69		10.99	584.7	680.5	174.8
High	[K].DTSATLGASVVLECR.[V]	1xCarbamidomethyl [C14]; 1xTMTpro [N-Term]	2.39455e-09	2.82963e-05	1	1	1	8	A2ASS6	A2ASS6 [7637-7651]	A2ASS6 1xCarbamidomethyl [C7650]	Titin OS=Mus musculus OX=10090 GN=Ttn PE=1 SV=1	0	1882.99	6.505	0.515	1.102	0.451	0.498	1.172	0.262972	0.530036	0.880725	0.0873692	0.218164	0.678616	0.965523	0.999952	0.999996	0.608525	0.928689	0.995093	11146.9	881.7	1888.8	772.8	854	1713.7	2008.9	56.31	1.48	0.18	1.68	8.47		9.45	5596.8	4443.8	774
High	[K].VDHSDVGEYTCK.[A]	1xCarbamidomethyl [C11]; 1xTMTpro [K12]; 1xTMTpro [N-Term]	6.18896e-09	2.82963e-05	1	1	1	1	A2ASS6	A2ASS6 [7970-7981]	A2ASS6 1xCarbamidomethyl [C7980]	Titin OS=Mus musculus OX=10090 GN=Ttn PE=1 SV=1	0	2018.01	6.718	0.257	1.054	0.432	0.407	0.686	0.0297728	0.138635	0.514583	0.269696	0.352068	0.956323	0.443495	0.895491	0.999526	0.915407	0.989183	0.999948	3627.4	138.8	569.3	233	219.7	540	370.4	65.64	5.74	10.74	5.29	16.36		25.47	1975.1	1333.5	128.2
High	[K].DVHETLGFPVAFECR.[I]	1xCarbamidomethyl [C14]; 1xTMTpro [N-Term]	8.01288e-09	2.82963e-05	1	1	1	2	A2ASS6	A2ASS6 [8012-8026]	A2ASS6 1xCarbamidomethyl [C8025]	Titin OS=Mus musculus OX=10090 GN=Ttn PE=1 SV=1	0	2081.04	5.743	0.74	1.637	0.518	0.529	2.146	0.0012909	0.787561	0.188956	0.30261	0.411582	0.0832349	0.067797	0.999952	0.904829	0.938858	0.999794	0.822899	1729.9	222.8	492.9	156	159.2	301.2	646.2	39.43	8.29	6	10.3	4.47		13.44	758.8	789.4	186.4
High	[K].GDAGQYTCYASNVAGK.[D]	1xCarbamidomethyl [C8]; 1xTMTpro [K16]; 1xTMTpro [N-Term]	1.90009e-05	2.82963e-05	1	1	1	1	A2ASS6	A2ASS6 [8165-8180]	A2ASS6 1xCarbamidomethyl [C8172]	Titin OS=Mus musculus OX=10090 GN=Ttn PE=1 SV=1	0	2270.14	1.842	0.982	2.236	0.89	0.726	1.241	0.179346	0.889511	0.0773197	0.900639	0.792142	0.510144	0.894202	0.999952	0.717762	1	0.99991	0.994122	485.6	258.9	589.4	234.7	191.4	263.6	327	45.43	1.86	2.48	11	0.09		9.54	223.2	211.5	232.7
High	[K].QDEYTRYECKIGGSPEIK.[V]	1xCarbamidomethyl [C9]; 2xTMTpro [K10; K18]; 1xTMTpro [N-Term]	0.0115238	0.000763256	1	1	1	1	A2ASS6	A2ASS6 [8207-8224]	A2ASS6 1xCarbamidomethyl [C8215]	Titin OS=Mus musculus OX=10090 GN=Ttn PE=1 SV=1	2	3085.64	1.308	0.437	0.361	0.184	0.827	0.647	0.955125	0.316475	0.346166	0.00497456	0.564083	0.898528	0.999984	0.989785	0.986682	0.105597	0.99991	0.998093	3445.2	1150.4	950.4	485.4	2178.1	2634.7	1703.7	55.69	21.45	20.49	35.02	19.15		1.81	1720.9	1380.6	1189.1
High	[K].GADVHLECELQGTPPFQVSWHK.[D]	1xCarbamidomethyl [C8]; 1xTMTpro [K22]; 1xTMTpro [N-Term]	1.2963e-11	2.82963e-05	1	1	1	3	A2ASS6	A2ASS6 [8301-8322]	A2ASS6 1xCarbamidomethyl [C8308]	Titin OS=Mus musculus OX=10090 GN=Ttn PE=1 SV=1	0	3143.62	2.292	0.424	5.091	0.161	0.223	0.51	0.292907	0.44117	0.215837	0.00383602	0.0453457	0.769613	0.973801	0.999596	0.92595	0.0880318	0.536532	0.996886	2706.2	500.6	6011.2	190.5	262.9	1180.8	602.3	54.43	1.05	2.65	26.64	0.54		6.73	1337.6	1095.9	440.8
High	[K].ATNDVGSDTCVGSVTMK.[A]	1xCarbamidomethyl [C10]; 1xTMTpro [K17]; 1xTMTpro [N-Term]	1.56227e-07	2.82963e-05	1	1	1	1	A2ASS6	A2ASS6 [8361-8377]	A2ASS6 1xCarbamidomethyl [C8370]	Titin OS=Mus musculus OX=10090 GN=Ttn PE=1 SV=1	0	2350.19	0.981	0.674	2.918	0.431	0.396	0.964	0.62906	0.688257	0.0357312	0.15177	0.162167	0.700025	0.996109	0.999952	0.556972	0.765334	0.861007	0.995093	304.1	208.8	904.4	133.4	122.7	309.9	298.8	46.35	10.23	4.29	1.1	6.34		5.72	140.8	131.5	199.1
High	[K].YTCQIK.[N]	1xCarbamidomethyl [C3]; 1xTMTpro [K6]; 1xTMTpro [N-Term]	0.0210216	0.00131987	1	1	1	1	A2ASS6	A2ASS6 [8451-8456]	A2ASS6 1xCarbamidomethyl [C8453]	Titin OS=Mus musculus OX=10090 GN=Ttn PE=1 SV=1	0	1420.81	2.049	0.183	2.441	0.099	0.089	0.217	0.310437	0.0505608	0.38955	0.00026621	0.000776125	0.132399	0.97918	0.755408	0.993251	0.0118307	0.0500135	0.907517	2388.1	213.3	2845.7	115	103.3	1165.7	252.8	66.77	5.98	19.08	2.45	13.27		23.45	1313.8	868.9	181.4
High	[K].ETNGLSGSSVVMECK.[V]	1xCarbamidomethyl [C14]; 1xTMTpro [K15]; 1xTMTpro [N-Term]	3.23948e-07	2.82963e-05	1	1	1	1	A2ASS6	A2ASS6 [8578-8592]	A2ASS6 1xCarbamidomethyl [C8591]	Titin OS=Mus musculus OX=10090 GN=Ttn PE=1 SV=1	0	2206.13	0.841	1.175	1.731	0.552	0.518	0.613	0.782632	0.548048	0.208533	0.462077	0.522417	0.959397	0.999984	0.999952	0.920856	1	0.99991	0.999948	395.3	552.2	813.2	259.3	243.6	469.9	288	43.26	5.58	20.14	1.08	10.59		16	178.6	175.1	470.9
High	[K].LRPTATCK.[M]	1xCarbamidomethyl [C7]; 1xTMTpro [K8]; 1xTMTpro [N-Term]	0.0764852	0.00514013	1	1	1	1	A2ASS6	A2ASS6 [8889-8896]	A2ASS6 1xCarbamidomethyl [C8895]	Titin OS=Mus musculus OX=10090 GN=Ttn PE=1 SV=1	0	1554.93	1.505	0.217	3.903	0.143	0.125	0.218	0.324703	0.0662468	0.0720909	0.0104067	0.0104427	0.280412	0.985066	0.795942	0.704508	0.177355	0.250717	0.994122	888	127.9	2303	84.5	73.9	590.1	128.9	56.82	14.25	12.99	4.13	18.86		3.36	447.8	352.5	125.5
High	[R].SLSGQYSCTATNPIGSASSGAK.[L]	1xCarbamidomethyl [C8]; 1xTMTpro [K22]; 1xTMTpro [N-Term]	2.39848e-11	2.82963e-05	1	1	1	2	A2ASS6	A2ASS6 [9010-9031]	A2ASS6 1xCarbamidomethyl [C9017]	Titin OS=Mus musculus OX=10090 GN=Ttn PE=1 SV=1	0	2752.41	0.801	0.608	4.391	0.416	0.27	0.524	0.906919	0.804832	0.0515477	0.24208	0.104479	0.848714	0.999984	0.999952	0.636613	0.888564	0.749594	0.997925	445.6	338.5	2443.5	231.6	150	556.4	291.4	53.47	5.92	11.41	8.54	0.61		9.08	218.5	181.9	313.1
High	[K].NNVEIHPTSNCEIMFK.[N]	1xCarbamidomethyl [C11]; 1xTMTpro [K16]; 1xTMTpro [N-Term]	6.46693e-07	2.82963e-05	1	1	1	1	A2ASS6	A2ASS6 [9174-9189]	A2ASS6 1xCarbamidomethyl [C9184]	Titin OS=Mus musculus OX=10090 GN=Ttn PE=1 SV=1	0	2541.31	1.418	0.417	2.092	0.243	0.482	0.653	0.431016	0.483785	0.178106	0.0460795	0.450883	0.977435	0.996109	0.999596	0.892331	0.442264	0.99991	0.999948	1085.8	319	1601.4	185.7	369.4	765.5	499.5	69.57	11.61	25.79	14.04	5.94		26.84	612.9	385	307.2
High	[K].ATNDAGSALCTSSIVIK.[E]	1xCarbamidomethyl [C10]; 1xTMTpro [K17]; 1xTMTpro [N-Term]	2.46232e-06	2.82963e-05	1	1	1	1	A2ASS6	A2ASS6 [9212-9228]	A2ASS6 1xCarbamidomethyl [C9221]	Titin OS=Mus musculus OX=10090 GN=Ttn PE=1 SV=1	0	2316.27	0.916	1.068	2.445	0.556	0.558	1.168	0.657613	0.659813	0.0764446	0.505155	0.556997	0.473606	0.996109	0.999952	0.717044	1	0.99991	0.994122	333.9	389.2	891	202.6	203.5	364.4	425.6	30.65	10	7.5	11.28	4.41		6.65	137.1	162.8	370.6
High	[K].ATNDAGSALCTSSIVIKEPK.[K]	1xCarbamidomethyl [C10]; 2xTMTpro [K17; K20]; 1xTMTpro [N-Term]	1.25441e-08	2.82963e-05	1	1	1	2	A2ASS6	A2ASS6 [9212-9231]	A2ASS6 1xCarbamidomethyl [C9221]	Titin OS=Mus musculus OX=10090 GN=Ttn PE=1 SV=1	1	2974.67	0.868	0.582	2.846	0.604	0.434	0.884	0.941671	0.580197	0.54729	0.35261	0.20133	0.892294	0.999984	0.999952	0.999526	0.964114	0.915246	0.998093	1484.8	995.9	4867.7	1032.8	742.6	1710.6	1512.1	23.97	3.9	16.14	0.84	3		4.61	580.4	760.3	908.1
High	[K].KPPVFDQHLAPVTASEGDSVQLSCHVQGSEPIR.[I]	1xCarbamidomethyl [C24]; 1xTMTpro [K1]; 1xTMTpro [N-Term]	9.54265e-09	2.82963e-05	1	1	1	1	A2ASS6	A2ASS6 [9232-9264]	A2ASS6 1xCarbamidomethyl [C9255]	Titin OS=Mus musculus OX=10090 GN=Ttn PE=1 SV=1	1	4194.19	1.254	0.577	4.758	0.273	0.249	0.464	0.334892	0.486123	0.0112294	0.0331995	0.0277976	0.657668	0.986771	0.999596	0.32722	0.369878	0.435195	0.995093	445	204.9	1687.9	97	88.5	354.8	164.7	50.39	2.23	3.61	9.28	6.65		19.31	212.8	186.3	178.9
High	[K].ADSGDYVCK.[A]	1xCarbamidomethyl [C8]; 1xTMTpro [K9]; 1xTMTpro [N-Term]	5.25737e-05	2.82963e-05	1	1	1	1	A2ASS6	A2ASS6 [9299-9307]	A2ASS6 1xCarbamidomethyl [C9306]	Titin OS=Mus musculus OX=10090 GN=Ttn PE=1 SV=1	0	1622.83	1.707	0.32	2.806	0.137	0.125	0.272	0.233962	0.255262	0.0788188	0.00439707	0.0071018	0.356265	0.945895	0.970335	0.719431	0.0971698	0.203034	0.994122	982.5	184.2	1615.2	79	72.1	575.5	156.4	37.44	4.05	17.66	4.03	5.8		2.53	424.5	455.2	168.1
High	[K].ADSGDYVCKASNVAGSDTSK.[C]	1xCarbamidomethyl [C8]; 2xTMTpro [K9; K20]; 1xTMTpro [N-Term]	0.00109755	5.93436e-05	1	1	1	1	A2ASS6	A2ASS6 [9299-9318]	A2ASS6 1xCarbamidomethyl [C9306]	Titin OS=Mus musculus OX=10090 GN=Ttn PE=1 SV=1	1	2944.51	0.899	0.337	1.965	0.805	0.282	0.436	0.760683	0.142675	0.0908513	0.937716	0.0395198	0.49241	0.999984	0.898427	0.754246	1	0.506451	0.994122	288	107.9	629.5	258	90.2	320.4	139.8	41.24	11.6	18.62	7.02	6.44		8.14	128.1	129.6	103.9
High	[R].VKNCQPK.[D]	1xCarbamidomethyl [C4]; 2xTMTpro [K2; K7]; 1xTMTpro [N-Term]	0.0446385	0.0031243	1	1	1	1	A2ASS6	A2ASS6 [9604-9610]	A2ASS6 1xCarbamidomethyl [C9607]	Titin OS=Mus musculus OX=10090 GN=Ttn PE=1 SV=1	1	1786.08	0.807	0.319	2.196	0.239	0.136	0.468	0.943316	0.24659	0.441884	0.028437	0.00982509	0.714143	0.999984	0.967205	0.999091	0.336358	0.243649	0.995093	1013	400.7	2757	300.3	170.4	1255.4	587.7	51.98	4.1	32.35	4.74	7.67		14.02	490.7	418.6	365.9
High	[K].NVTVIEGESVTLECHISGYPSPK.[V]	1xCarbamidomethyl [C14]; 1xTMTpro [K23]; 1xTMTpro [N-Term]	6.31474e-15	2.82963e-05	1	1	1	2	A2ASS6	A2ASS6 [954-976]	A2ASS6 1xCarbamidomethyl [C967]	Titin OS=Mus musculus OX=10090 GN=Ttn PE=1 SV=1	0	3124.65	1.131	0.312	3.099	0.184	0.193	0.508	0.735828	0.224654	0.421408	0.00861984	0.0179367	0.716738	0.999984	0.957494	0.999091	0.155289	0.346476	0.995093	1486.6	410	4074.1	242.5	253.3	1314.8	668.1	57.08	1.49	18.47	12.67	5.46		13.23	751.3	588.8	359.9
High	[R].AEDQGQYTCK.[H]	1xCarbamidomethyl [C9]; 1xTMTpro [K10]; 1xTMTpro [N-Term]	6.36942e-07	2.82963e-05	1	1	1	1	A2ASS6	A2ASS6 [9696-9705]	A2ASS6 1xCarbamidomethyl [C9704]	Titin OS=Mus musculus OX=10090 GN=Ttn PE=1 SV=1	0	1807.91	1.386	0.089	2.452	0.063	0.042	0.29	0.383523	0.00195906	0.114044	4.37145e-05	5.70935e-05	0.29424	0.996089	0.248508	0.805673	0.00291611	0.00799293	0.994122	1005.9	64.3	1780.2	46	30.4	726	210.4	74.34	25.37	31.6		27.56		12.6	594.3	340.8	68.4
High	[R].AEDQGQYTCKHEDLETSAELR.[I]	1xCarbamidomethyl [C9]; 1xTMTpro [K10]; 1xTMTpro [N-Term]	4.57096e-10	2.82963e-05	1	1	1	1	A2ASS6	A2ASS6 [9696-9716]	A2ASS6 1xCarbamidomethyl [C9704]	Titin OS=Mus musculus OX=10090 GN=Ttn PE=1 SV=1	1	3088.51	0.608	0.212	3.465	0.083	0.085	0.17	0.740276	0.098446	0.232786	3.30179e-05	0.00047022	0.0971198	0.999984	0.850703	0.9374	0.00233297	0.0341227	0.849687	602	209.8	3430.1	82.2	84.1	990	168.3	60.33	6.91	19.03	12.54	44		36.81	312.8	231.9	195.4
High	[K].DKGEYVCDCGTDTTK.[A]	2xCarbamidomethyl [C7; C9]; 2xTMTpro [K2; K15]; 1xTMTpro [N-Term]	5.81447e-07	2.82963e-05	1	1	1	2	A2ASS6	A2ASS6 [13516-13530]	A2ASS6 2xCarbamidomethyl [C13522; C13524]	Titin OS=Mus musculus OX=10090 GN=Ttn PE=1 SV=1	1	2661.33	0.244	0.28	1.796	0.173	0.176	0.217	0.0792428	0.151732	0.607853	0.00278633	0.0132704	0.144837	0.693296	0.908699	0.999526	0.0688462	0.290077	0.918012	358.5	411.6	2636.5	253.4	257.8	1467.9	318.7	34.15	7.97	30.24	13.66	1.8		2.42	151.1	170.3	386.3
High	[K].SDIGQYTCDCGTDQTSGK.[L]	2xCarbamidomethyl [C8; C10]; 1xTMTpro [K18]; 1xTMTpro [N-Term]	2.72912e-11	2.82963e-05	1	1	1	2	A2ASS6	A2ASS6 [13871-13888]	A2ASS6 2xCarbamidomethyl [C13878; C13880]	Titin OS=Mus musculus OX=10090 GN=Ttn PE=1 SV=1	0	2601.21	0.092	0.167	2.422	0.037	0.033	0.07	0.00399684	0.057931	0.58592	1.93434e-08	2.81952e-07	0.00255579	0.139366	0.773761	0.999526	7.08232e-06	0.000144198	0.148642	145.2	263.5	3828.6	58.1	52.3	1580.4	110.2	55.02	18.9	24.81	26.61	3.07		3.8	72.1	58.5	267.4
High	[K].SDIGQYTCDCGTDQTSGKLDIEDR.[E]	2xCarbamidomethyl [C8; C10]; 1xTMTpro [K18]; 1xTMTpro [N-Term]	4.17614e-11	2.82963e-05	1	1	1	2	A2ASS6	A2ASS6 [13871-13894]	A2ASS6 2xCarbamidomethyl [C13878; C13880]	Titin OS=Mus musculus OX=10090 GN=Ttn PE=1 SV=1	1	3342.57	0.134	0.359	4.229	0.114	0.11	0.22	0.00784454	0.343872	0.224262	0.00188263	0.00450174	0.217556	0.206039	0.993275	0.932916	0.0516189	0.155897	0.972712	142	381	4483.3	121.3	116.1	1060	233.5	25.47	12.8	18.58	43.47	0.88		6.43	56.1	71.9	370.1
High	[K].CLLNDEAEYSCEVR.[T]	2xCarbamidomethyl [C1; C11]; 1xTMTpro [N-Term]	1.27361e-08	2.82963e-05	1	1	1	1	A2ASS6	A2ASS6 [14224-14237]	A2ASS6 2xCarbamidomethyl [C14224; C14234]	Titin OS=Mus musculus OX=10090 GN=Ttn PE=1 SV=1	0	2061.95	0.633	0.294	2.29	0.11	0.083	0.375	0.88207	0.278699	0.153989	0.000455173	0.00180376	0.594747	0.999984	0.975559	0.8664	0.0176908	0.0901039	0.995093	443.7	205.8	1605.2	77.4	58.5	701.1	263.1	67.76	14.11	15.99	10.28	16.23		14.71	246.3	160	201.8
High	[R].LEDECEYACGVEDR.[K]	2xCarbamidomethyl [C5; C9]; 1xTMTpro [N-Term]	2.07271e-09	2.82963e-05	1	1	1	1	A2ASS6	A2ASS6 [14675-14688]	A2ASS6 2xCarbamidomethyl [C14679; C14683]	Titin OS=Mus musculus OX=10090 GN=Ttn PE=1 SV=1	0	2048.89	0.532	0.272	2.799	0.091	0.097	0.263	0.698836	0.111011	0.0750812	0.000669557	0.00111195	0.275962	0.999058	0.865459	0.712949	0.0237096	0.0649733	0.994122	332.1	169.8	1746	56.6	60.5	623.9	164.1	68.08	20.13	12.29	9.42	6.81		21.06	184.9	119.4	173.8
High	[K].AVNEAGESEPSDTTGEIPATDIQEVPEVFIDIGAQDCLVCK.[A]	2xCarbamidomethyl [C37; C40]; 1xTMTpro [K41]; 1xTMTpro [N-Term]	2.27054e-09	2.82963e-05	1	1	1	1	A2ASS6	A2ASS6 [17572-17612]	A2ASS6 2xCarbamidomethyl [C17608; C17611]	Titin OS=Mus musculus OX=10090 GN=Ttn PE=1 SV=1	0	5012.45	0.603	1.033	2.786	0.407	0.712	1.374	0.680415	0.96684	0.0290899	0.18492	0.694446	0.335395	0.997641	0.999952	0.510285	0.820376	0.99991	0.994122	57.2	98	264.3	38.6	67.5	94.9	130.3	15.24	9.98	4.6	18.85	11.07		0.99	21	31.2	81
High	[K].NSECYVARDPCDPPGTPEAIIVKR.[N]	2xCarbamidomethyl [C4; C11]; 1xTMTpro [K23]; 1xTMTpro [N-Term]	0.084621	0.00565615	1	1	1	1	A2ASS6	A2ASS6 [25300-25323]	A2ASS6 2xCarbamidomethyl [C25303; C25310]	Titin OS=Mus musculus OX=10090 GN=Ttn PE=1 SV=1	2	3352.73	1.36	1.041	2.98	0.577	0.589	2.052	0.302271	0.91601	0.0374808	0.589603	0.566381	0.223816	0.97556	0.999952	0.568295	1	0.99991	0.975548	200.2	153.2	438.5	85	86.6	147.1	301.9	41.05	8.55	4.38	1.21	5.13		10.13	88.9	90.2	127.9
High	[K].ACEPVPARDPCDPPGQPEVTNITR.[K]	2xCarbamidomethyl [C2; C11]; 1xTMTpro [N-Term]	6.93593e-09	2.82963e-05	1	1	1	2	A2ASS6	A2ASS6 [27464-27487]	A2ASS6 2xCarbamidomethyl [C27465; C27474]	Titin OS=Mus musculus OX=10090 GN=Ttn PE=1 SV=1	1	2980.46	1.895	0.462	4.831	0.227	0.14	0.554	0.23734	0.570626	0.170325	0.0143071	0.0118359	0.910512	0.947362	0.999952	0.884188	0.219199	0.271232	0.998563	1623.2	395.9	4137.7	194.7	119.8	856.6	474.3	55.26	0.1	10.7	6.78	7		12.33	807.9	652.8	351.4
High	[R].CNFTDVSECQYTVTGLSPGDRYEFR.[I]	2xCarbamidomethyl [C1; C9]; 1xTMTpro [N-Term]	1.20049e-10	2.82963e-05	1	1	1	1	A2ASS6	A2ASS6 [29692-29716]	A2ASS6 2xCarbamidomethyl [C29692; C29700]	Titin OS=Mus musculus OX=10090 GN=Ttn PE=1 SV=1	1	3305.52	0.693	0.248	3.808	0.094	0.066	0.342	0.948135	0.0570408	0.0358779	4.54554e-05	9.88954e-05	0.516244	0.999984	0.770589	0.558448	0.00300118	0.011979	0.994122	332.3	118.9	1826.9	45.2	31.8	479.7	164.1	78.33	7.13	0.59	12.46	6.31		17.31	204.3	108.2	100.3
High	[R].LLANAECHEGQSVCFEIR.[V]	2xCarbamidomethyl [C7; C14]; 1xTMTpro [N-Term]	7.33278e-12	2.82963e-05	1	1	1	3	A2ASS6	A2ASS6 [33588-33605]	A2ASS6 2xCarbamidomethyl [C33594; C33601]	Titin OS=Mus musculus OX=10090 GN=Ttn PE=1 SV=1	0	2437.19	1.262	0.751	3.873	0.562	0.636	1.36	0.485561	0.964764	0.193283	0.450123	0.587611	0.434701	0.996109	0.999952	0.908826	0.99848	0.99991	0.994122	1019.8	607.2	3130.1	454.4	513.7	808.2	1099.6	21.2	6.58	9.46	1.89	2.02		9.91	390.7	532.8	514.1
High	[K].RLLANAECHEGQSVCFEIR.[V]	2xCarbamidomethyl [C8; C15]; 1xTMTpro [N-Term]	8.2394e-06	2.82963e-05	1	1	1	1	A2ASS6	A2ASS6 [33587-33605]	A2ASS6 2xCarbamidomethyl [C33594; C33601]	Titin OS=Mus musculus OX=10090 GN=Ttn PE=1 SV=1	1	2593.29	1.038	1.436	3.175	1.055	0.915	0.81	0.605291	0.516891	0.0250841	0.761878	0.939371	0.80582	0.996109	0.999952	0.478557	1	0.99999	0.997925	220	304.1	672.5	223.4	193.8	211.8	171.5	17.41	5.76	10.03	5.5	8.32		9.74	82	118.1	259
High	[K].IHNLSESDCGEYVCEVSGEGGTSK.[T]	2xCarbamidomethyl [C9; C14]; 1xTMTpro [K24]; 1xTMTpro [N-Term]	4.51315e-13	2.82963e-05	1	1	1	1	A2ASS6	A2ASS6 [34567-34590]	A2ASS6 2xCarbamidomethyl [C34575; C34580]	Titin OS=Mus musculus OX=10090 GN=Ttn PE=1 SV=1	0	3222.52	0.267	0.403	2.469	0.293	0.193	0.681	0.0608183	0.113548	0.0479469	0.0534322	0.00421741	0.980283	0.622281	0.867784	0.622279	0.478434	0.149298	0.999948	57.6	87	532.6	63.3	41.7	215.8	146.9	20.2	21.43	14.57	0.86	0.76		0.49	21.9	30.3	89.9
High	[K].TETSDGGLYACTVTNSAGSVSSSCK.[L]	2xCarbamidomethyl [C11; C24]; 1xTMTpro [K25]; 1xTMTpro [N-Term]	5.37477e-13	2.82963e-05	1	1	1	1	A2ASS6	A2ASS6 [34703-34727]	A2ASS6 2xCarbamidomethyl [C34713; C34726]	Titin OS=Mus musculus OX=10090 GN=Ttn PE=1 SV=1	0	3147.51	0.14	0.296	2.116	0.15	0.121	0.226	0.00350668	0.040046	0.0852115	0.000274506	7.55416e-05	0.257989	0.127523	0.736111	0.738241	0.0120663	0.00976638	0.994122	21.2	44.6	319	22.6	18.3	150.7	34	52.58	0.78	27.31	3.1	23.51		28.34	10.3	8.7	39.8
High	[R].FQDEGEYTCLASNEYGKAVCSAHLR.[I]	2xCarbamidomethyl [C9; C20]; 1xTMTpro [K17]; 1xTMTpro [N-Term]	1.14511e-08	2.82963e-05	1	1	1	1	A2ASS6	A2ASS6 [3573-3597]	A2ASS6 2xCarbamidomethyl [C3581; C3592]	Titin OS=Mus musculus OX=10090 GN=Ttn PE=1 SV=1	1	3513.7	0.818	0.802	2.865	0.64	0.521	1.63	0.893754	0.793306	0.0199596	0.509888	0.353997	0.278199	0.999984	0.999952	0.434173	1	0.989183	0.994122	221.9	217.5	777.1	173.7	141.4	271.2	442.1	7	4.18	7.26	3.56	3.94		11.41	76.8	128.3	187.3
High	[R].TQVVDCGEYTCK.[A]	2xCarbamidomethyl [C6; C11]; 1xTMTpro [K12]; 1xTMTpro [N-Term]	7.08999e-08	2.82963e-05	1	1	1	2	A2ASS6	A2ASS6 [4406-4417]	A2ASS6 2xCarbamidomethyl [C4411; C4416]	Titin OS=Mus musculus OX=10090 GN=Ttn PE=1 SV=1	0	2068.03	0.928	0.472	1.942	0.501	0.28	0.499	0.701194	0.491651	0.189947	0.441822	0.123816	0.775482	0.999058	0.999596	0.906255	0.996187	0.789658	0.997212	520.8	265	1089.5	280.9	157	561	280.1	49.67	1.89	14.89	6.35	4.7		8.75	247.6	219.3	232
High	[K].AQNEVGSDACVCAVK.[L]	2xCarbamidomethyl [C10; C12]; 1xTMTpro [K15]; 1xTMTpro [N-Term]	6.62145e-08	2.82963e-05	1	1	1	1	A2ASS6	A2ASS6 [6479-6493]	A2ASS6 2xCarbamidomethyl [C6488; C6490]	Titin OS=Mus musculus OX=10090 GN=Ttn PE=1 SV=1	0	2216.13	5.816	0.832	1.458	0.527	0.645	2.569	0.00267764	0.870548	0.31638	0.301043	0.624327	0.0926564	0.107554	0.999952	0.981698	0.938858	0.99991	0.844552	1316.5	188.4	330	119.3	146.1	226.4	581.6	70.19	5.13	4.55	8.85	15.85		8.59	747.5	464.1	161.2
High	[K].VTTGDTCTLECTVSGTPELSTK.[W]	2xCarbamidomethyl [C7; C11]; 1xTMTpro [K22]; 1xTMTpro [N-Term]	1.04792e-11	2.82963e-05	1	1	1	7	A2ASS6	A2ASS6 [8485-8506]	A2ASS6 2xCarbamidomethyl [C8491; C8495]	Titin OS=Mus musculus OX=10090 GN=Ttn PE=1 SV=1	0	2965.5	0.573	0.662	3.623	0.284	0.32	0.577	0.596826	0.665611	0.407963	0.0292559	0.0532991	0.789647	0.996109	0.999952	0.997009	0.34215	0.573388	0.997547	1140.1	1317.7	7208.9	564.2	637.6	1989.7	1148.4	37.39	12.19	11.96	6.07	1.83		4.14	492.4	528.4	1274.4
High	[K].EGQTCTMTCQFSVPNVK.[S]	2xCarbamidomethyl [C5; C9]; 1xTMTpro [K17]; 1xTMTpro [N-Term]	1.52958e-09	2.82963e-05	1	1	1	1	A2ASS6	A2ASS6 [9646-9662]	A2ASS6 2xCarbamidomethyl [C9650; C9654]	Titin OS=Mus musculus OX=10090 GN=Ttn PE=1 SV=1	0	2595.29	0.4	0.338	3.77	0.315	0.244	0.936	0.339693	0.236954	0.0813475	0.0952308	0.0636443	0.677391	0.987822	0.963871	0.726245	0.633023	0.620085	0.995093	231	195.2	2179	182.3	141.2	578	540.9	21.85	2.84	19.45	8.95	0.45		2.79	88.9	120.1	176.7
High	[R].LIIKDCRLEDECEYACGVEDR.[K]	3xCarbamidomethyl [C6; C12; C16]; 1xTMTpro [K4]; 1xTMTpro [N-Term]	1.78971e-06	2.82963e-05	1	1	1	1	A2ASS6	A2ASS6 [14668-14688]	A2ASS6 3xCarbamidomethyl [C14673; C14679; C14683]	Titin OS=Mus musculus OX=10090 GN=Ttn PE=1 SV=1	2	3251.6	0.76	0.676	4.003	0.38	0.25	1.002	0.980457	0.500628	0.00830866	0.155809	0.0286361	0.568633	0.999984	0.999596	0.288672	0.775509	0.44104	0.995093	75.2	66.9	396	37.6	24.7	98.9	99.1	29.43	2.97	11.97	9.31	8.5		1.75	30.6	37	60.6
High	[R].SNNMCIVGGFTQMIR.[E]	1xCarbamidomethyl [C5]; 1xTMTpro [N-Term]	3.37597e-11	2.82963e-05	1	1	1	1	A2ASZ8	A2ASZ8 [221-235]	A2ASZ8 1xCarbamidomethyl [C225]	Calcium-binding mitochondrial carrier protein SCaMC-2 OS=Mus musculus OX=10090 GN=Slc25a25 PE=1 SV=1	0	2032.01	0.588	0.994	0.776	1.427	1.179	0.786	0.648102	0.943277	0.95008	0.676792	0.907131	0.948262	0.996109	0.999952	0.999996	1	0.999916	0.999948	787.1	1329.3	1037.9	1909.5	1577.1	1337.8	1051	2.75	1.93	25.73	28.87	1.85		14.88	254.3	487.7	1195.4
High	[R].KTGQYSGMLDCAR.[R]	1xCarbamidomethyl [C11]; 1xTMTpro [K1]; 1xTMTpro [N-Term]	7.19853e-08	2.82963e-05	1	1	1	1	A2ASZ8	A2ASZ8 [312-324]	A2ASZ8 1xCarbamidomethyl [C322]	Calcium-binding mitochondrial carrier protein SCaMC-2 OS=Mus musculus OX=10090 GN=Slc25a25 PE=1 SV=1	1	2095.09	0.235	1.664	0.347	1.597	0.95	0.237	0.0582676	0.496761	0.250737	0.397313	0.94915	0.196524	0.60954	0.999596	0.949659	0.983491	0.99999	0.96056	231.4	1639.2	341.9	1573.3	936	985.3	233.3	12.83	8.54	19.18	35	13.38		3.14	69.6	154	1544.7
High	[K].TGQYSGMLDCAR.[R]	1xCarbamidomethyl [C10]; 1xTMTpro [N-Term]	5.22783e-07	2.82963e-05	1	1	1	2	A2ASZ8	A2ASZ8 [313-324]	A2ASZ8 1xCarbamidomethyl [C322]	Calcium-binding mitochondrial carrier protein SCaMC-2 OS=Mus musculus OX=10090 GN=Slc25a25 PE=1 SV=1	0	1662.79	0.464	0.805	0.207	0.875	1.925	0.752	0.520247	0.975226	0.0887422	0.788469	0.499473	0.908395	0.996109	0.999952	0.749187	1	0.99991	0.998563	553.6	959.9	247	1043	2295.4	1192.5	897	18.36	3.29	8.32	32.74	6.54		6.54	207.8	295.2	871.5
High	[K].TGQYSGMLDCARR.[I]	1xCarbamidomethyl [C10]; 1xTMTpro [N-Term]	2.00385e-05	2.82963e-05	1	1	1	1	A2ASZ8	A2ASZ8 [313-325]	A2ASZ8 1xCarbamidomethyl [C322]	Calcium-binding mitochondrial carrier protein SCaMC-2 OS=Mus musculus OX=10090 GN=Slc25a25 PE=1 SV=1	1	1818.89	0.61	1.408	0.56	1.521	0.981	0.541	0.773373	0.502581	0.621807	0.376146	0.784822	0.804432	0.999984	0.999596	0.999526	0.973667	0.99991	0.997925	201.3	465.2	184.9	502.3	324.1	330.3	178.7	7.71	1	24.71	27.91	1.02		4.68	62.8	129.2	409.7
High	[K].LVGCAIIHVNGDSPEEVVR.[A]	1xCarbamidomethyl [C4]; 1xTMTpro [N-Term]	1.31291e-08	2.82963e-05	1	1	1	1	A2ATU0	A2ATU0 [390-408]	A2ATU0 1xCarbamidomethyl [C393]	2-oxoadipate dehydrogenase complex component E1 OS=Mus musculus OX=10090 GN=Dhtkd1 PE=1 SV=1	0	2368.26	1.531	0.64	0.895	1.302	2.4	1.096	0.224997	0.634387	0.821832	0.512295	0.155125	0.539339	0.942061	0.999952	0.999996	1	0.848333	0.994566	555.9	232.4	324.7	472.5	871.1	363	397.8	15.2	0.63	15.65	21.31	12.53		3.44	164.4	376.3	205.2
High	[K].DVIVDLLCYR.[Q]	1xCarbamidomethyl [C8]; 1xTMTpro [N-Term]	5.10572e-06	2.82963e-05	1	1	1	1	A2ATU0	A2ATU0 [423-432]	A2ATU0 1xCarbamidomethyl [C430]	2-oxoadipate dehydrogenase complex component E1 OS=Mus musculus OX=10090 GN=Dhtkd1 PE=1 SV=1	0	1569.86	0.178	0.184	0.127	1.289	2.842	0.144	0.0390789	0.0645075	0.0104762	0.619406	0.279692	0.0539683	0.512463	0.791784	0.317904	1	0.970247	0.732609	149.2	153.9	106.5	1078.6	2378.4	836.9	120.1	6.84	5.55	13.34	19.92	9		2.14	51.6	86.4	142
High	[R].WQGLVQPEACVTTWDTGVPLELLR.[F]	1xCarbamidomethyl [C10]; 1xTMTpro [N-Term]	2.8278e-08	2.82963e-05	1	1	1	1	A2ATU0	A2ATU0 [510-533]	A2ATU0 1xCarbamidomethyl [C519]	2-oxoadipate dehydrogenase complex component E1 OS=Mus musculus OX=10090 GN=Dhtkd1 PE=1 SV=1	0	3072.61	1.257	1.448	1.026	1.025	1.219	1.7	0.344668	0.441209	0.542658	0.813445	0.508083	0.233136	0.990605	0.999596	0.999526	1	0.99991	0.983104	547	630	446.5	445.9	530.4	435.1	739.8	6.15	0.7	2.38	1.25	2.99		7.69	188.2	318.2	561.6
High	[R].LVTVYCEHGHK.[A]	1xCarbamidomethyl [C6]; 1xTMTpro [K11]; 1xTMTpro [N-Term]	1.00556e-07	2.82963e-05	1	1	1	3	A2ATU0	A2ATU0 [60-70]	A2ATU0 1xCarbamidomethyl [C65]	2-oxoadipate dehydrogenase complex component E1 OS=Mus musculus OX=10090 GN=Dhtkd1 PE=1 SV=1	0	1951.07	0.572	0.387	0.511	1.505	2.187	0.588	0.637362	0.396195	0.546158	0.585565	0.416534	0.937805	0.996109	0.999596	0.999526	1	0.99991	0.999948	664.4	449.8	594.5	1749.8	2542	1162.5	683	17.3	0.85	5.22	24.96	5.96		13.68	247.5	357	396.6
High	[K].TLIFCSGK.[H]	1xCarbamidomethyl [C5]; 1xTMTpro [K8]; 1xTMTpro [N-Term]	0.000159269	2.82963e-05	1	1	1	1	A2ATU0	A2ATU0 [805-812]	A2ATU0 1xCarbamidomethyl [C809]	2-oxoadipate dehydrogenase complex component E1 OS=Mus musculus OX=10090 GN=Dhtkd1 PE=1 SV=1	0	1533.9	0.382	0.392	0.445	1.124	1.916	0.399	0.288994	0.33887	0.449174	0.951851	0.833665	0.457179	0.973307	0.991935	0.999091	1	0.99991	0.994122	725.9	743.2	845.4	2134	3636.1	1897.8	757.5	19.52	8.17	2.92	8.69	5.32		9.11	208.1	506.8	698.5
High	[R].LEELCPFPLDALQQEMSK.[Y]	1xCarbamidomethyl [C5]; 1xTMTpro [K18]; 1xTMTpro [N-Term]	1.10993e-07	2.82963e-05	1	1	1	1	A2ATU0	A2ATU0 [836-853]	A2ATU0 1xCarbamidomethyl [C840]	2-oxoadipate dehydrogenase complex component E1 OS=Mus musculus OX=10090 GN=Dhtkd1 PE=1 SV=1	0	2756.45	0.329	0.221	0.207	0.867	2.363	0.237	0.19817	0.13107	0.0392228	0.874275	0.342337	0.263106	0.916008	0.888707	0.577059	1	0.987609	0.994122	290.6	195.1	182.4	765	2085.5	882.5	209.4	29.6	7.51	9.51	6.84	13.55		11.55	118.4	142.8	182.5
High	[R].LAPGNCLAILR.[L]	1xCarbamidomethyl [C6]; 1xTMTpro [N-Term]	3.99976e-05	2.82963e-05	1	1	1	1	A2AUC9	A2AUC9 [130-140]	A2AUC9 1xCarbamidomethyl [C135]	Kelch-like protein 41 OS=Mus musculus OX=10090 GN=Klhl41 PE=1 SV=1	0	1501.88	3.843	0.375	1.929	0.32	0.375	0.66	0.274744	0.313894	0.437962	0.0829901	0.155532	0.918697	0.965817	0.989613	0.999091	0.595535	0.848788	0.998589	4258.2	415.2	2137.6	354.1	416	1108	730.9	41.6	5.91	6.7	5.03	0.63		0.57	1899.4	1910.8	384
High	[R].LGLLLDCPR.[L]	1xCarbamidomethyl [C7]; 1xTMTpro [N-Term]	0.000175781	2.82963e-05	1	1	1	1	A2AUC9	A2AUC9 [141-149]	A2AUC9 1xCarbamidomethyl [C147]	Kelch-like protein 41 OS=Mus musculus OX=10090 GN=Klhl41 PE=1 SV=1	0	1360.79	4.486	0.479	2.42	0.379	0.437	0.542	0.25894	0.485742	0.328882	0.109243	0.260357	0.869052	0.962291	0.999596	0.982386	0.673829	0.961417	0.998045	4682.2	499.6	2525.9	395.1	456.2	1043.8	565.8	38.47	6.32	11.12	15.63	2.86			2038.8	2152.3	423.8
High	[K].NLSEVFDCIR.[F]	1xCarbamidomethyl [C8]; 1xTMTpro [N-Term]	2.35261e-06	2.82963e-05	1	1	1	2	A2AUC9	A2AUC9 [214-223]	A2AUC9 1xCarbamidomethyl [C221]	Kelch-like protein 41 OS=Mus musculus OX=10090 GN=Klhl41 PE=1 SV=1	0	1556.81	4.057	0.36	1.694	0.291	0.304	0.579	0.425208	0.299739	0.785254	0.0381576	0.0920589	0.765634	0.996109	0.98618	0.999996	0.399778	0.715076	0.996756	6884.1	611.5	2874.5	493.5	515.9	1696.7	981.8	45.68	5.99	1.16	4.09	7.26		0.1	3170.1	2992.3	519.9
High	[K].DLQTEASLDSVLCYDPVAAK.[W]	1xCarbamidomethyl [C13]; 1xTMTpro [K20]; 1xTMTpro [N-Term]	1.07671e-07	2.82963e-05	1	1	1	1	A2AUC9	A2AUC9 [407-426]	A2AUC9 1xCarbamidomethyl [C419]	Kelch-like protein 41 OS=Mus musculus OX=10090 GN=Klhl41 PE=1 SV=1	0	2803.47	1.962	0.266	1.247	0.61	2.08	0.595	0.297829	0.210871	0.478926	0.484325	0.306429	0.875323	0.974428	0.952827	0.999091	1	0.981188	0.998045	1690.3	229.5	1074.2	525.2	1791.3	861.3	512.8	32.92	5.58	2.01	14.29	1.8		21.44	705.8	810.3	211.8
High	[K].SFPCHR.[L]	1xCarbamidomethyl [C4]; 1xTMTpro [N-Term]	0.0691051	0.00478914	1	1	1	2	A2AUC9	A2AUC9 [43-48]	A2AUC9 1xCarbamidomethyl [C46]	Kelch-like protein 41 OS=Mus musculus OX=10090 GN=Klhl41 PE=1 SV=1	0	1107.57	2.501	0.564	3.862	0.569	0.251	0.7	0.0671199	0.500512	0.0273505	0.393857	0.0309606	0.971776	0.65119	0.999596	0.493794	0.981792	0.457157	0.999948	838.3	188.9	1294.5	190.8	84	335.2	234.7	29.11	1.5	18.29	14.55	3.35		6.67	340.3	413.4	165.8
High	[R].LILSACSPYFR.[E]	1xCarbamidomethyl [C6]; 1xTMTpro [N-Term]	5.9485e-07	2.82963e-05	1	1	1	1	A2AUC9	A2AUC9 [49-59]	A2AUC9 1xCarbamidomethyl [C54]	Kelch-like protein 41 OS=Mus musculus OX=10090 GN=Klhl41 PE=1 SV=1	0	1630.89	3.066	0.326	2.048	0.372	0.559	0.566	0.170099	0.308381	0.310614	0.121165	0.430482	0.88773	0.886985	0.989613	0.978584	0.701893	0.99991	0.998045	2974.5	316.3	1986.3	361.3	542.1	970	548.9	38.17	3.94	10.33	15.23	4.73		16.6	1292.3	1370.4	288.5
High	[R].YASGASCLATR.[L]	1xCarbamidomethyl [C7]; 1xTMTpro [N-Term]	7.01595e-05	2.82963e-05	1	1	1	1	A2AUC9	A2AUC9 [587-597]	A2AUC9 1xCarbamidomethyl [C593]	Kelch-like protein 41 OS=Mus musculus OX=10090 GN=Klhl41 PE=1 SV=1	0	1460.75	1.792	1.208	1.349	1.32	1.043	0.767	0.133264	0.701265	0.322843	0.409232	0.685282	0.783507	0.83255	0.999952	0.982386	0.98822	0.99991	0.997212	128.8	86.7	96.9	94.8	74.9	71.8	55.1	2.26	2.88	19.66	14.71	5.87		17.83	43.1	77	75.4
High	[R].ASELQAECAGLR.[K]	1xCarbamidomethyl [C8]; 1xTMTpro [N-Term]	1.39287e-06	2.82963e-05	1	1	1	1	A2AV25	A2AV25 [149-160]	A2AV25 1xCarbamidomethyl [C156]	Fibrinogen C domain-containing protein 1 OS=Mus musculus OX=10090 GN=Fibcd1 PE=2 SV=1	0	1608.83	0.64	2.729	0.751	0.865	0.866	1.267	0.709909	0.0700871	0.921838	0.85717	0.987589	0.48639	0.999058	0.808031	0.999996	1	0.99999	0.994122	146	622.3	171.3	197.3	197.5	228	289	13.91	3.21	6.84	0.96	7.56		26.38	53.1	80.4	539.6
High	[R].TCPHLR.[Q]	1xCarbamidomethyl [C2]; 1xTMTpro [N-Term]	0.0240366	0.00169995	1	1	1	1	A2AVA0	A2AVA0 [438-443]	A2AVA0 1xCarbamidomethyl [C439]	Sushi, von Willebrand factor type A, EGF and pentraxin domain-containing protein 1 OS=Mus musculus OX=10090 GN=Svep1 PE=1 SV=1	0	1087.6	1.098	0.86	0.597	1.072	1.146	7.922	0.501332	0.796396	0.399074	0.687871	0.59416	0.00450375	0.996109	0.999952	0.994179	1	0.99991	0.216583	103.1	80.8	56	100.6	107.6	93.9	744	48.05	5.78	7.42	4.78	10.03		17.84	48.4	44	68.8
High	[K].GHIPYPLPPNYSYGLCSR.[F]	1xCarbamidomethyl [C16]; 1xTMTpro [N-Term]	5.73622e-09	2.82963e-05	1	1	1	1	A2AVZ9	A2AVZ9 [211-228]	A2AVZ9 1xCarbamidomethyl [C226]	Equilibrative nucleobase transporter 1 OS=Mus musculus OX=10090 GN=Slc43a3 PE=1 SV=1	0	2395.22	1.168	0.902	1.701	1.221	1.023	1.31	0.415186	0.833157	0.14602	0.607688	0.795546	0.437178	0.996109	0.999952	0.855643	1	0.99991	0.994122	461.1	356.1	671.4	482	403.6	394.6	517.1	2.33	0.29	4.07	6.68	12.8		0.83	149.4	284.8	315.2
High	[K].LTYLGCASVNAPR.[S]	1xCarbamidomethyl [C6]; 1xTMTpro [N-Term]	9.74656e-07	2.82963e-05	1	1	1	1	A2AWA9	A2AWA9 [145-157]	A2AWA9 1xCarbamidomethyl [C150]	Rab GTPase-activating protein 1 OS=Mus musculus OX=10090 GN=Rabgap1 PE=1 SV=1	0	1725.93	0.984	1.422	0.959	1.239	0.86	1.748	0.838311	0.650381	0.764681	0.690495	0.873226	0.297558	0.999984	0.999952	0.999996	1	0.999916	0.994122	1124.7	1624.4	1096.4	1415.7	982.2	1142.7	1997.9	4.84	5.5	5.06	15.1	4.87		4.23	383.4	660.4	1385.9
High	[R].GHDGTPESDCFAFTESHYNAELFR.[I]	1xCarbamidomethyl [C10]; 1xTMTpro [N-Term]	3.90016e-11	2.82963e-05	1	1	1	2	A2AWA9	A2AWA9 [216-239]	A2AWA9 1xCarbamidomethyl [C225]	Rab GTPase-activating protein 1 OS=Mus musculus OX=10090 GN=Rabgap1 PE=1 SV=1	0	3091.38	0.676	2.195	0.867	1.369	0.776	0.832	0.907859	0.224308	0.728837	0.516839	0.975845	0.711472	0.999984	0.957494	0.999996	1	0.99999	0.995093	360.9	1171.8	462.5	730.6	414.4	533.8	444	11.08	4.54	5.02	27.94	9.19		11.71	109.9	237.2	1006.6
High	[R].CEIQEAVSR.[I]	1xCarbamidomethyl [C1]; 1xTMTpro [N-Term]	0.000247295	2.82963e-05	1	1	1	2	A2AWA9	A2AWA9 [245-253]	A2AWA9 1xCarbamidomethyl [C245]	Rab GTPase-activating protein 1 OS=Mus musculus OX=10090 GN=Rabgap1 PE=1 SV=1	0	1395.72	0.957	1.102	0.517	0.828	0.705	1.207	0.762652	0.688523	0.616617	0.841514	0.706897	0.430798	0.999984	0.999952	0.999526	1	0.99991	0.994122	757.2	872.3	408.8	655.3	558.2	791.4	955.5	20.82	0.89	4.13	4.93	14.48		23.06	289.3	396.7	778.7
High	[R].IHVFRCEIQEAVSR.[I]	1xCarbamidomethyl [C6]; 1xTMTpro [N-Term]	5.59301e-06	2.82963e-05	1	1	1	1	A2AWA9	A2AWA9 [240-253]	A2AWA9 1xCarbamidomethyl [C245]	Rab GTPase-activating protein 1 OS=Mus musculus OX=10090 GN=Rabgap1 PE=1 SV=1	1	2048.1	0.625	2.196	1.554	1.317	0.834	0.616	0.727284	0.142445	0.264442	0.467804	0.919071	0.96747	0.999984	0.898427	0.956346	1	0.999916	0.999948	58.7	206.2	145.9	123.7	78.3	93.9	57.8	3.24	13.2	42.2	28.05	12.52		15.77	18.9	36.5	166.6
High	[K].DKDRQCFK.[L]	1xCarbamidomethyl [C6]; 2xTMTpro [K2; K8]; 1xTMTpro [N-Term]	0.158629	0.00888224	1	1	1	1	A2AWA9	A2AWA9 [308-315]	A2AWA9 1xCarbamidomethyl [C313]	Rab GTPase-activating protein 1 OS=Mus musculus OX=10090 GN=Rabgap1 PE=1 SV=1	2	2009.14	0.424	1.067	0.539	0.798	0.542	0.442	0.35327	0.769429	0.627991	0.803152	0.428765	0.622288	0.992244	0.999952	0.999526	1	0.99991	0.995093	362	911.3	460.1	681.5	462.8	853.9	377.4	3.43	6.87	3.47	7.38	4.64		23.96	116.4	225.4	848.7
High	[K].IVICVQQTANK.[E]	1xCarbamidomethyl [C4]; 1xTMTpro [K11]; 1xTMTpro [N-Term]	3.31688e-08	2.82963e-05	1	1	1	1	A2AWA9	A2AWA9 [324-334]	A2AWA9 1xCarbamidomethyl [C327]	Rab GTPase-activating protein 1 OS=Mus musculus OX=10090 GN=Rabgap1 PE=1 SV=1	0	1882.11	0.652	1.472	0.581	1.221	0.779	0.965	0.821245	0.516273	0.720981	0.742084	0.769443	0.594999	0.999984	0.999952	0.999996	1	0.99991	0.995093	539	1217.3	480.5	1010.1	644.3	827.1	798.4	10.96	2.99	9.05	15.53	1.53		11.85	164.3	354	1102.9
High	[K].KNNADTLYEVVCLESESERER.[R]	1xCarbamidomethyl [C12]; 1xTMTpro [K1]; 1xTMTpro [N-Term]	7.61665e-12	2.82963e-05	1	1	1	1	A2AWA9	A2AWA9 [460-480]	A2AWA9 1xCarbamidomethyl [C471]	Rab GTPase-activating protein 1 OS=Mus musculus OX=10090 GN=Rabgap1 PE=1 SV=1	2	3149.6	0.296	2.091	0.799	1.582	0.652	0.256	0.152513	0.32986	0.882946	0.44479	0.736633	0.303006	0.865247	0.989785	0.999996	0.997321	0.99991	0.994122	209.2	1477	564.6	1117.1	460.1	706.2	181	4.17	9.09	6.09	18.74	26.91		4.46	66.9	130.9	1397.3
High	[K].DTGGDGQDSLYKICK.[A]	1xCarbamidomethyl [C14]; 2xTMTpro [K12; K15]; 1xTMTpro [N-Term]	0.0181118	0.00114543	1	1	1	1	A2AWA9	A2AWA9 [617-631]	A2AWA9 1xCarbamidomethyl [C630]	Rab GTPase-activating protein 1 OS=Mus musculus OX=10090 GN=Rabgap1 PE=1 SV=1	1	2569.37	0.582	0.988	0.67	0.692	0.66	0.441	0.782979	0.779349	0.872289	0.606541	0.652126	0.644757	0.999984	0.999952	0.999996	1	0.99991	0.995093	478.1	811.6	550.2	568.1	542.1	821.4	361.9	4.01	6.1	4.06	6.48	5.46		4.86	153.1	298.9	751.7
High	[K].QNFEDLHCKFYQLER.[L]	1xCarbamidomethyl [C8]; 1xTMTpro [K9]; 1xTMTpro [N-Term]	0.000830266	5.93436e-05	1	1	1	1	A2AWA9	A2AWA9 [681-695]	A2AWA9 1xCarbamidomethyl [C688]	Rab GTPase-activating protein 1 OS=Mus musculus OX=10090 GN=Rabgap1 PE=1 SV=1	1	2635.36	1.117	0.987	0.839	1.027	0.698	3.377	0.657621	0.87427	0.960042	0.967566	0.593345	0.17311	0.996109	0.999952	0.999996	1	0.99991	0.945619	1078.8	953.5	810.6	991.5	673.7	965.6	3261.3	9.42	8.37	0.97	7.46	3.98		6.92	379.9	613.2	797.2
High	[R].LMELACNTK.[I]	1xCarbamidomethyl [C6]; 1xTMTpro [K9]; 1xTMTpro [N-Term]	7.52156e-06	2.82963e-05	1	1	1	1	A2AWA9	A2AWA9 [795-803]	A2AWA9 1xCarbamidomethyl [C800]	Rab GTPase-activating protein 1 OS=Mus musculus OX=10090 GN=Rabgap1 PE=1 SV=1	0	1687.94	0.907	1.056	1.019	1.336	0.743	0.781	0.963334	0.9936	0.954086	0.738801	0.618656	0.990988	0.999984	0.999952	0.999996	1	0.99991	0.999948	1508.2	1757	1694.4	2221.7	1236.5	1663.4	1299.4	17.92	1.78	2.94	8.38	12.27		5.25	437.4	1041	1578.3
High	[K].QICSQLSER.[L]	1xCarbamidomethyl [C3]; 1xTMTpro [N-Term]	5.33783e-05	2.82963e-05	1	1	1	1	A2AWA9	A2AWA9 [934-942]	A2AWA9 1xCarbamidomethyl [C936]	Rab GTPase-activating protein 1 OS=Mus musculus OX=10090 GN=Rabgap1 PE=1 SV=1	0	1424.75	0.599	2.303	0.511	1.364	0.839	0.585	0.75768	0.164118	0.470412	0.50977	0.970686	0.881795	0.999984	0.918091	0.999091	1	0.99999	0.998045	229.4	882.3	195.8	522.3	321.3	383.1	224.1	12.9	9.95	13.47	23.83	7.87		3.09	82.8	127.2	729.4
High	[K].EICSVAIISGGQGYR.[H]	1xCarbamidomethyl [C3]; 1xTMTpro [N-Term]	3.49516e-07	2.82963e-05	1	1	1	2	A2AWP8	A2AWP8 [1234-1248]	A2AWP8 1xCarbamidomethyl [C1236]	Rho guanine nucleotide exchange factor 10-like protein OS=Mus musculus OX=10090 GN=Arhgef10l PE=1 SV=1	0	1914.01	0.742	1.231	1.226	1.013	1.479	1.12	0.97578	0.63226	0.46328	0.882282	0.577101	0.496176	0.999984	0.999952	0.999091	1	0.99991	0.994122	610	1012.3	1008.4	833.6	1216.2	822.6	921.3	11.63	7.5	3.78	13.11	3.3		0.29	218.2	341.3	851.5
High	[R].QVCSTDR.[V]	1xCarbamidomethyl [C3]; 1xTMTpro [N-Term]	0.00151695	9.06176e-05	1	1	1	1	A2AWP8	A2AWP8 [440-446]	A2AWP8 1xCarbamidomethyl [C442]	Rho guanine nucleotide exchange factor 10-like protein OS=Mus musculus OX=10090 GN=Arhgef10l PE=1 SV=1	0	1169.59	0.233	0.813	0.68	1.119	1.724	0.472	0.115478	0.924825	0.963596	0.704136	0.304385	0.730961	0.801429	0.999952	0.999996	1	0.980456	0.995093	119.1	415.4	347.1	571.6	880.5	510.7	241	40.05	8.4	0.16	30.44	4.76		80.26	52.5	54.1	347.2
High	[R].EENQPGWLCPDEDKK.[S]	1xCarbamidomethyl [C9]; 2xTMTpro [K14; K15]; 1xTMTpro [N-Term]	3.06915e-06	2.82963e-05	1	1	1	1	A2AWP8	A2AWP8 [757-771]	A2AWP8 1xCarbamidomethyl [C765]	Rho guanine nucleotide exchange factor 10-like protein OS=Mus musculus OX=10090 GN=Arhgef10l PE=1 SV=1	1	2757.43	0.523	0.408	0.412	0.468	0.915	0.74	0.614784	0.400861	0.472787	0.30827	0.941957	0.913047	0.996109	0.999596	0.999091	0.941825	0.99999	0.998573	414.3	322.7	326.1	370.7	724.3	791.4	585.8	25.36	5.66	6.59	8.51	17.21		2.03	163.6	210	298
High	[K].SFPVAAPVLCIEYIPDPEEEAEGAEESR.[A]	1xCarbamidomethyl [C10]; 1xTMTpro [N-Term]	2.38229e-12	2.82963e-05	1	1	1	2	A2AWP8	A2AWP8 [852-879]	A2AWP8 1xCarbamidomethyl [C861]	Rho guanine nucleotide exchange factor 10-like protein OS=Mus musculus OX=10090 GN=Arhgef10l PE=1 SV=1	0	3408.65	0.8	1.109	1.067	1.09	1.611	1.056	0.906719	0.692536	0.640464	0.657181	0.313847	0.57258	0.999984	0.999952	0.999526	1	0.982801	0.995093	268.1	371.7	357.5	365.2	539.8	335.1	353.8	17.75	5.78	5.86	19.69	1.46		2.95	100.2	143.6	316.5
High	[K].SPGPQPVLCLR.[H]	1xCarbamidomethyl [C9]; 1xTMTpro [N-Term]	0.000207709	2.82963e-05	1	1	1	1	A2AWP8	A2AWP8 [919-929]	A2AWP8 1xCarbamidomethyl [C927]	Rho guanine nucleotide exchange factor 10-like protein OS=Mus musculus OX=10090 GN=Arhgef10l PE=1 SV=1	0	1527.86	0.364	1.151	1.235	1.302	1.431	0.484	0.307025	0.748068	0.555228	0.751645	0.631389	0.692164	0.977388	0.999952	0.999526	1	0.99991	0.995093	376.4	1190.8	1278.4	1347.5	1481.4	1034.8	500.7	3.63	9.38	11.59	22.68	5.76		19.15	127.2	222.9	988.4
High	[R].TLLSLEDAAWASCGPR.[V]	1xCarbamidomethyl [C13]; 1xTMTpro [N-Term]	1.56356e-08	2.82963e-05	1	1	1	2	A2AWP8	A2AWP8 [974-989]	A2AWP8 1xCarbamidomethyl [C986]	Rho guanine nucleotide exchange factor 10-like protein OS=Mus musculus OX=10090 GN=Arhgef10l PE=1 SV=1	0	2051.06	1.16	1.057	1.17	1.077	1.54	2.38	0.431738	0.80535	0.527263	0.736515	0.34356	0.0969659	0.996109	0.999952	0.999526	1	0.987609	0.849435	294.4	268.3	296.8	273.4	390.9	253.8	604.1	6.97	4.16	13.31	13.11	5.17		15.87	101.9	170.3	231.1
High	[R].LNSAVECVAYPR.[A]	1xCarbamidomethyl [C7]; 1xTMTpro [N-Term]	2.34059e-09	2.82963e-05	1	1	1	2	A2BDX3	A2BDX3 [148-159]	A2BDX3 1xCarbamidomethyl [C154]	Adenylyltransferase and sulfurtransferase MOCS3 OS=Mus musculus OX=10090 GN=Mocs3 PE=1 SV=1	0	1682.89	0.622	1.245	0.729	1.205	1.843	0.532	0.635284	0.75474	0.96238	0.846415	0.584515	0.658405	0.996109	0.999952	0.999996	1	0.99991	0.995093	786.4	1573.9	921.6	1524.3	2330.4	1264.6	673.1	6.78	8.35	10.47	15.96	4.81		10.06	246.9	501.3	1316
High	[R].RLNSAVECVAYPR.[A]	1xCarbamidomethyl [C8]; 1xTMTpro [N-Term]	9.62332e-10	2.82963e-05	1	1	1	2	A2BDX3	A2BDX3 [147-159]	A2BDX3 1xCarbamidomethyl [C154]	Adenylyltransferase and sulfurtransferase MOCS3 OS=Mus musculus OX=10090 GN=Mocs3 PE=1 SV=1	1	1838.99	0.842	1.666	1.119	1.56	1.291	0.79	0.896306	0.420005	0.591584	0.460269	0.68432	0.794155	0.999984	0.999596	0.999526	1	0.99991	0.997787	640.3	1266.8	850.8	1186.5	981.9	760.5	601	4.93	5.37	12.78	20.4	21.29		4.16	218.4	375.7	1081.9
High	[R].FEGQMTVYHHDGGPCYR.[C]	1xCarbamidomethyl [C15]; 1xTMTpro [N-Term]	6.57134e-08	2.82963e-05	1	1	1	2	A2BDX3	A2BDX3 [208-224]	A2BDX3 1xCarbamidomethyl [C222]	Adenylyltransferase and sulfurtransferase MOCS3 OS=Mus musculus OX=10090 GN=Mocs3 PE=1 SV=1	0	2358.07	0.62	1.18	0.723	1.057	1.574	0.886	0.805033	0.671027	0.76529	0.740926	0.262276	0.690364	0.999984	0.999952	0.999996	1	0.963547	0.995093	163.3	310.9	190.6	278.6	414.8	263.5	233.5	20.41	6.59	3.1	17.4	10.1		18.59	62.2	85.8	263.2
High	[R].LQDYEAFCGSSATDK.[C]	1xCarbamidomethyl [C8]; 1xTMTpro [K15]; 1xTMTpro [N-Term]	2.05195e-06	2.82963e-05	1	1	1	1	A2BDX3	A2BDX3 [309-323]	A2BDX3 1xCarbamidomethyl [C316]	Adenylyltransferase and sulfurtransferase MOCS3 OS=Mus musculus OX=10090 GN=Mocs3 PE=1 SV=1	0	2300.14	2.158	0.903	1.083	0.808	0.873	3.189	0.108908	0.885686	0.466136	0.998387	0.87485	0.0552372	0.790138	0.999952	0.999091	1	0.999916	0.739432	801.3	335.1	402.1	299.8	324.1	371.2	1184	22.14	1.11	1.17	5.15	10.35		7.26	309.1	415.8	294.9
High	[R].GYDVVADCCDNVPTR.[Y]	2xCarbamidomethyl [C8; C9]; 1xTMTpro [N-Term]	2.84936e-08	2.82963e-05	1	1	1	2	A2BDX3	A2BDX3 [172-186]	A2BDX3 2xCarbamidomethyl [C179; C180]	Adenylyltransferase and sulfurtransferase MOCS3 OS=Mus musculus OX=10090 GN=Mocs3 PE=1 SV=1	0	2044.94	1.027	1.909	1.035	1.172	1.352	1.311	0.56396	0.239361	0.6397	0.598654	0.426501	0.468092	0.996109	0.964746	0.999526	1	0.99991	0.994122	269.7	501.5	271.9	307.8	355.2	262.6	344.3	5.99	2.72	9.6	11.38	10.02		12.55	92.7	157.1	453.5
High	[R].RPDCVVCGQQPTVTR.[L]	2xCarbamidomethyl [C4; C7]; 1xTMTpro [N-Term]	3.8029e-08	2.82963e-05	1	1	1	1	A2BDX3	A2BDX3 [294-308]	A2BDX3 2xCarbamidomethyl [C297; C300]	Adenylyltransferase and sulfurtransferase MOCS3 OS=Mus musculus OX=10090 GN=Mocs3 PE=1 SV=1	1	2077.06	0.622	1.423	0.79	1.423	1.914	0.681	0.792001	0.510635	0.843479	0.43184	0.159844	0.958474	0.999984	0.999596	0.999996	0.991746	0.857946	0.999948	95.9	219.2	121.7	219.2	294.9	154.1	105	8.36	6.49	5.13	18.84	3.77		4.19	33.5	54.9	185.7
High	[R].RRPDCVVCGQQPTVTR.[L]	2xCarbamidomethyl [C5; C8]; 1xTMTpro [N-Term]	8.6969e-07	2.82963e-05	1	1	1	1	A2BDX3	A2BDX3 [293-308]	A2BDX3 2xCarbamidomethyl [C297; C300]	Adenylyltransferase and sulfurtransferase MOCS3 OS=Mus musculus OX=10090 GN=Mocs3 PE=1 SV=1	2	2233.16	0.652	1.748	0.827	1.666	1.814	0.521	0.815235	0.29908	0.936968	0.274672	0.211014	0.857461	0.999984	0.985678	0.999996	0.91957	0.922762	0.998045	75.7	203	96	193.4	210.6	116.1	60.5	10.86	6.82	13.8	26.43	15.59		28.32	23.1	49.7	171.6
High	[K].ACTLAR.[R]	1xCarbamidomethyl [C2]; 1xTMTpro [N-Term]	0.0141018	0.000862909	2	2	1	2	A2CG49; Q0KL02	A2CG49 [1038-1043]; Q0KL02 [1073-1078]	A2CG49 1xCarbamidomethyl [C1039]; Q0KL02 1xCarbamidomethyl [C1074]	Kalirin OS=Mus musculus OX=10090 GN=Kalrn PE=1 SV=1 Triple functional domain protein OS=Mus musculus OX=10090 GN=Trio PE=1 SV=3	0	995.563	0.302	3.732	0.348	0.637	0.295	0.323	0.204847	0.358429	0.239874	0.598495	0.0947964	0.423686	0.922684	0.995378	0.943144	1	0.724758	0.994122	293.4	3627	338.6	619.6	286.8	972	313.9	3.42	5.62	12.59	2.99	0.62		1.26	99	174	3092
High	[R].LDQCQQYVVFER.[S]	1xCarbamidomethyl [C4]; 1xTMTpro [N-Term]	1.31183e-07	2.82963e-05	2	2	1	2	A2CG49; Q0KL02	A2CG49 [1099-1110]; Q0KL02 [1134-1145]	A2CG49 1xCarbamidomethyl [C1102]; Q0KL02 1xCarbamidomethyl [C1137]	Kalirin OS=Mus musculus OX=10090 GN=Kalrn PE=1 SV=1 Triple functional domain protein OS=Mus musculus OX=10090 GN=Trio PE=1 SV=3	0	1888.95	0.298	3.001	0.501	0.504	0.354	0.411	0.196336	0.135666	0.629009	0.376512	0.229716	0.547308	0.912774	0.891901	0.999526	0.973737	0.939231	0.994789	143.5	1443.7	241.1	242.3	170.2	481	197.9	1.29	3.81	14.34	2.43	8.26		8.39	47.7	86.4	1246.6
High	[R].RLDQCQQYVVFER.[S]	1xCarbamidomethyl [C5]; 1xTMTpro [N-Term]	1.09319e-07	2.82963e-05	2	2	1	2	A2CG49; Q0KL02	A2CG49 [1098-1110]; Q0KL02 [1133-1145]	A2CG49 1xCarbamidomethyl [C1102]; Q0KL02 1xCarbamidomethyl [C1137]	Kalirin OS=Mus musculus OX=10090 GN=Kalrn PE=1 SV=1 Triple functional domain protein OS=Mus musculus OX=10090 GN=Trio PE=1 SV=3	1	2045.06	0.326	4.479	0.826	0.881	0.695	0.448	0.199167	0.142577	0.771599	0.94088	0.86734	0.66396	0.917096	0.898427	0.999996	1	0.999916	0.995093	181.6	2494.2	459.7	490.4	387.2	556.9	249.6	6.45	8.25	8.83	18.77	7.59		25.2	62.6	105.4	2087
High	[K].AGLECSDIEK.[A]	1xCarbamidomethyl [C5]; 1xTMTpro [K10]; 1xTMTpro [N-Term]	9.10247e-07	2.82963e-05	1	1	1	1	A2CG49	A2CG49 [2051-2060]	A2CG49 1xCarbamidomethyl [C2055]	Kalirin OS=Mus musculus OX=10090 GN=Kalrn PE=1 SV=1	0	1729.93	0.386	1.414	0.797	1.296	1.299	0.658	0.441199	0.457059	0.860957	0.59794	0.487082	0.960642	0.996109	0.999596	0.999996	1	0.99991	0.999948	196.5	720.9	406.3	660.6	662.2	509.7	335.4	9.65	26.76	3.6	10.83	9.35		22.92	69.3	111.5	774.5
High	[K].RCNDMMNLGR.[L]	1xCarbamidomethyl [C2]; 1xTMTpro [N-Term]	0.000292185	2.82963e-05	1	1	1	1	A2CG49	A2CG49 [2071-2080]	A2CG49 1xCarbamidomethyl [C2072]	Kalirin OS=Mus musculus OX=10090 GN=Kalrn PE=1 SV=1	1	1570.76	0.479	1.9	0.964	1.309	0.912	0.409	0.447951	0.248903	0.727048	0.502386	0.915065	0.637318	0.996109	0.967205	0.999996	1	0.999916	0.995093	60.5	240.1	121.8	165.5	115.2	126.4	51.7	17.73	4.69	0.38	3.26	9.8			22.6	32.4	206
High	[K].LDQCFQLR.[L]	1xCarbamidomethyl [C4]; 1xTMTpro [N-Term]	0.00104902	5.93436e-05	2	2	1	1	A2CG49; Q0KL02	A2CG49 [288-295]; Q0KL02 [336-343]	A2CG49 1xCarbamidomethyl [C291]; Q0KL02 1xCarbamidomethyl [C339]	Kalirin OS=Mus musculus OX=10090 GN=Kalrn PE=1 SV=1 Triple functional domain protein OS=Mus musculus OX=10090 GN=Trio PE=1 SV=3	0	1383.74	0.846	1.823	0.567	0.869	0.607	1.021	0.888484	0.424961	0.732276	0.86363	0.59612	0.564368	0.999984	0.999596	0.999996	1	0.99991	0.995093	681.1	1468.9	456.8	700.2	489.2	805.6	822.9	0.96	11.87	5.95	11.1	4.73		22.04	225.9	411.1	1197.9
High	[K].EVLEDVCADSVDAVQELIK.[Q]	1xCarbamidomethyl [C7]; 1xTMTpro [K19]; 1xTMTpro [N-Term]	5.27637e-09	2.82963e-05	1	1	1	1	A2CG49	A2CG49 [645-663]	A2CG49 1xCarbamidomethyl [C651]	Kalirin OS=Mus musculus OX=10090 GN=Kalrn PE=1 SV=1	0	2740.46	0.901	2.14	0.996	0.587	0.869	1.395	0.722087	0.224047	0.728768	0.48516	0.97318	0.385264	0.99964	0.957494	0.999996	1	0.99999	0.994122	115.6	274.7	127.9	75.4	111.5	128.4	179.1	23.06	7.73	4.46	8.34	13.73		3.08	44.9	59.6	257.4
High	[KR].LEQCLQLR.[H]	1xCarbamidomethyl [C4]; 1xTMTpro [N-Term]	0.000251074	2.82963e-05	1	2	1	1	A2CG49	A2CG49 [868-875]	A2CG49 1xCarbamidomethyl [C871]	Kalirin OS=Mus musculus OX=10090 GN=Kalrn PE=1 SV=1	0	1363.77	0.704	2.251	0.674	0.888	0.24	0.524	0.916197	0.456253	0.87534	0.790592	0.0874478	0.788427	0.999984	0.999596	0.999996	1	0.700888	0.997361	666.7	2133	638.6	841.8	227.8	947.6	496.4	11.18	9.24	3.83	7.74	6.09		3.34	202.9	438.5	1772.3
High	[K].RLEQCLQLR.[H]	1xCarbamidomethyl [C5]; 1xTMTpro [N-Term]	0.000327368	2.82963e-05	1	1	1	1	A2CG49	A2CG49 [867-875]	A2CG49 1xCarbamidomethyl [C871]	Kalirin OS=Mus musculus OX=10090 GN=Kalrn PE=1 SV=1	1	1519.87	0.223	4.532	0.344	0.47	0.294	0.213	0.055262	0.0516248	0.110431	0.176635	0.0557668	0.146162	0.595898	0.755408	0.798005	0.808859	0.586905	0.919374	63.8	1296.3	98.3	134.4	84	286	61.1	2.51	6.09	29.76	6.56	7.11		22.7	21.4	38.1	1101.4
High	[R].GEDTEVCLQVNQVTPSQLGNVSLR.[H]	1xCarbamidomethyl [C7]; 1xTMTpro [N-Term]	1.19336e-12	2.82963e-05	1	1	1	1	A2RSJ4	A2RSJ4 [1206-1229]	A2RSJ4 1xCarbamidomethyl [C1212]	UHRF1-binding protein 1-like OS=Mus musculus OX=10090 GN=Uhrf1bp1l PE=1 SV=2	0	2947.51	0.454	2.827	0.743	0.882	0.914	1.708	0.319787	0.0542773	0.783938	0.91861	0.861225	0.247421	0.983387	0.758739	0.999996	1	0.999916	0.989612	34.7	215.9	56.7	67.3	69.8	76.4	130.4	14.68	9.16	6.03	12.81	8.69		1.65	10.3	23.4	179.5
High	[R].IEADATQSSHLEIMCAPVR.[L]	1xCarbamidomethyl [C15]; 1xTMTpro [N-Term]	1.16551e-11	2.82963e-05	1	1	1	1	A2RSJ4	A2RSJ4 [190-208]	A2RSJ4 1xCarbamidomethyl [C204]	UHRF1-binding protein 1-like OS=Mus musculus OX=10090 GN=Uhrf1bp1l PE=1 SV=2	0	2432.22	1.324	1.411	0.797	1.033	1.123	1.187	0.341649	0.376259	0.8822	0.766675	0.647589	0.460121	0.988676	0.996752	0.999996	1	0.99991	0.994122	468.6	499.2	281.9	365.5	397.5	353.8	420	2.09	4.66	9.2	15.51	5.74		12.76	152.1	289	428.5
High	[K].EFQTCDQVTLNTSQSESSDLAGR.[M]	1xCarbamidomethyl [C5]; 1xTMTpro [N-Term]	6.19913e-11	2.82963e-05	1	1	1	1	A2RSJ4	A2RSJ4 [740-762]	A2RSJ4 1xCarbamidomethyl [C744]	UHRF1-binding protein 1-like OS=Mus musculus OX=10090 GN=Uhrf1bp1l PE=1 SV=2	0	2877.35	0.864	1.577	1.008	1.043	0.843	1.663	0.863406	0.425609	0.723749	0.867893	0.997942	0.250587	0.999984	0.999596	0.999996	1	0.99999	0.991603	128.8	235.1	150.2	155.5	125.6	149	247.9	13.18	6.25	16.91	14.09	2.49		1.38	46.6	71.3	199.5
High	[K].TFCHYVNAINTAPR.[N]	1xCarbamidomethyl [C3]; 1xTMTpro [N-Term]	1.35118e-06	2.82963e-05	1	1	1	1	A2RSQ0	A2RSQ0 [1184-1197]	A2RSQ0 1xCarbamidomethyl [C1186]	DENN domain-containing protein 5B OS=Mus musculus OX=10090 GN=Dennd5b PE=1 SV=2	0	1968.01	0.369	0.71	0.961	0.595	0.71	0.256	0.327014	0.832989	0.6484	0.539444	0.82578	0.291549	0.985849	0.999952	0.999996	1	0.99991	0.994122	168.1	323.2	437.6	271.2	323.4	455.5	116.5	27.46	2.24	18.87	11.69	3.33		16.68	67.4	83.9	291.3
High	[R].QIIFCTLAALAK.[E]	1xCarbamidomethyl [C5]; 1xTMTpro [K12]; 1xTMTpro [N-Term]	0.00444492	0.000288586	1	1	1	1	A2RSY6	A2RSY6 [258-269]	A2RSY6 1xCarbamidomethyl [C262]	TRMT1-like protein OS=Mus musculus OX=10090 GN=Trmt1l PE=1 SV=1	0	1957.18	1.107	0.819	0.797	0.808	1.147	0.695	0.549344	0.616639	0.873939	0.941202	0.626696	0.795378	0.996109	0.999952	0.999996	1	0.99991	0.997851	41.3	30.6	29.8	30.2	42.8	37.4	26	5.89	0.7	8.67	12.65	10.09		40.72	14.2	24.1	27
High	[R].RHYGCNIVR.[T]	1xCarbamidomethyl [C5]; 1xTMTpro [N-Term]	0.000637345	2.82963e-05	1	1	1	1	A2RSY6	A2RSY6 [410-418]	A2RSY6 1xCarbamidomethyl [C414]	TRMT1-like protein OS=Mus musculus OX=10090 GN=Trmt1l PE=1 SV=1	1	1478.8	0.754	0.981	1.131	1.448	1.496	1.081	0.985525	0.99104	0.584688	0.374204	0.305166	0.596893	0.999984	0.999952	0.999526	0.972213	0.980456	0.995093	112.7	146.7	169.2	216.5	223.7	149.5	161.7	2.9	12.6	20.59	25.3	15.97		7.58	37.9	67.1	119
High	[R].LELSGCNDFTEAGLWSSLSAR.[I]	1xCarbamidomethyl [C6]; 1xTMTpro [N-Term]	8.50795e-08	2.82963e-05	1	1	1	1	A2RT62	A2RT62 [223-243]	A2RT62 1xCarbamidomethyl [C228]	F-box/LRR-repeat protein 16 OS=Mus musculus OX=10090 GN=Fbxl16 PE=1 SV=1	0	2617.29	1.307	1.402	1.177	0.836	1.839	1.712	0.361285	0.508906	0.588198	0.929795	0.194507	0.305968	0.993035	0.999596	0.999526	1	0.908552	0.994122	199.9	214.5	180	127.9	281.3	153	261.9	2.89	2.54	7.96	0.64	7.73		10.3	67.2	119	186.9
High	[R].SLDLSWCPR.[I]	1xCarbamidomethyl [C7]; 1xTMTpro [N-Term]	4.69134e-05	2.82963e-05	1	1	1	2	A2RT62	A2RT62 [350-358]	A2RT62 1xCarbamidomethyl [C356]	F-box/LRR-repeat protein 16 OS=Mus musculus OX=10090 GN=Fbxl16 PE=1 SV=1	0	1437.75	0.345	3.915	0.381	0.541	0.249	0.231	0.207659	0.381103	0.295149	0.265271	0.0477274	0.167562	0.925835	0.999117	0.96934	0.912656	0.550385	0.940219	620.5	7048.1	685.5	974.8	447.6	1800.5	415.1	14.52	10	4.48	16.08	9.41		5.49	184.4	418	5824.6
High	[R].ITDMALEYVACDLHR.[L]	1xCarbamidomethyl [C11]; 1xTMTpro [N-Term]	4.92768e-09	2.82963e-05	1	1	1	2	A2RT62	A2RT62 [359-373]	A2RT62 1xCarbamidomethyl [C369]	F-box/LRR-repeat protein 16 OS=Mus musculus OX=10090 GN=Fbxl16 PE=1 SV=1	0	2111.06	0.63	2.33	1.57	0.486	0.722	0.895	0.782986	0.160189	0.244583	0.275256	0.796164	0.767244	0.999984	0.91738	0.946022	0.920304	0.99991	0.996886	200.1	740.4	498.9	154.5	229.4	317.8	284.4	6.5	9.63	9.87	1.81	6.7		10.93	69	116.1	613.5
High	[R].VALAGGPCPPASGPASGPVSGPPVERPPLATDEK.[I]	1xCarbamidomethyl [C8]; 1xTMTpro [K34]; 1xTMTpro [N-Term]	2.2212e-10	2.82963e-05	1	1	1	2	A2RT62	A2RT62 [67-100]	A2RT62 1xCarbamidomethyl [C74]	F-box/LRR-repeat protein 16 OS=Mus musculus OX=10090 GN=Fbxl16 PE=1 SV=1	1	3844.06	0.552	2.42	0.407	0.277	0.46	1.168	0.750028	0.270847	0.401294	0.0679683	0.373249	0.479448	0.999984	0.973941	0.994192	0.543931	0.990086	0.994122	404.7	1772.9	298	202.7	337.1	732.7	856	15.94	9.94	12.43	4.35	6.73		8.39	149.3	219.6	1465.8
High	[K].TYLQDCSEVTCMIR.[V]	2xCarbamidomethyl [C6; C11]; 1xTMTpro [N-Term]	7.87908e-07	2.82963e-05	1	1	1	1	A2RT67	A2RT67 [1191-1204]	A2RT67 2xCarbamidomethyl [C1196; C1201]	DENN domain-containing protein 3 OS=Mus musculus OX=10090 GN=Dennd3 PE=1 SV=2	0	2079.98	0.76	0.593	1.117	1.948	0.812	1.227	0.959312	0.367027	0.559266	0.121053	0.938185	0.403718	0.999984	0.996752	0.999526	0.701622	0.99999	0.994122	83.7	65.2	122.9	214.3	89.3	110	135	2.38	3.9	4.73	30.38	12.2		7.9	27.1	51.7	56.3
High	[R].HYCLCWATR.[G]	2xCarbamidomethyl [C3; C5]; 1xTMTpro [N-Term]	0.0641344	0.00437713	1	1	1	1	A2RTH5	A2RTH5 [312-320]	A2RTH5 2xCarbamidomethyl [C314; C316]	Leucine carboxyl methyltransferase 1 OS=Mus musculus OX=10090 GN=Lcmt1 PE=1 SV=1	0	1570.76	0.592	1.67	0.685	0.848	0.868	0.626	0.658974	0.284396	0.690909	0.82829	0.982533	0.954458	0.996109	0.976265	0.999996	1	0.99999	0.999948	135.4	382	156.6	193.9	198.6	228.8	143.2	4.34	8.4	2.22	12.95	9.63		16.45	46	79.8	319.3
High	[K].EQSWNILFSECGR.[G]	1xCarbamidomethyl [C11]; 1xTMTpro [N-Term]	9.44664e-06	2.82963e-05	1	1	1	1	A3KGB4	A3KGB4 [457-469]	A3KGB4 1xCarbamidomethyl [C467]	TBC1 domain family member 8B OS=Mus musculus OX=10090 GN=Tbc1d8b PE=1 SV=1	0	1929.94	1.241	0.904	1.137	1.195	1.291	2.172	0.408022	0.835749	0.415933	0.673305	0.498321	0.146708	0.996109	0.999952	0.999091	1	0.99991	0.919374	449.7	327.6	412.2	433	467.7	362.4	787.2	1.96	1.05	3.12	6.93	3.93		11.2	150.2	269.5	288.5
High	[K].HHDPSLPYLEQYQIDCQQFR.[V]	1xCarbamidomethyl [C16]; 1xTMTpro [N-Term]	1.07937e-10	2.82963e-05	1	1	1	1	A3KGB4	A3KGB4 [824-843]	A3KGB4 1xCarbamidomethyl [C839]	TBC1 domain family member 8B OS=Mus musculus OX=10090 GN=Tbc1d8b PE=1 SV=1	0	2878.39	0.814	0.708	0.556	1.18	1.749	1.471	0.866467	0.566096	0.422961	0.517108	0.235249	0.343651	0.999984	0.999952	0.999091	1	0.943471	0.994122	87.9	76.5	60	127.5	188.9	108	158.8	1.78	2.82	10.53	14.01	8.89		19.85	28.6	54.1	66.5
High	[K].NATEEPNECAR.[C]	1xCarbamidomethyl [C9]; 1xTMTpro [N-Term]	1.87472e-07	2.82963e-05	1	1	1	1	A3KGS3	A3KGS3 [1147-1157]	A3KGS3 1xCarbamidomethyl [C1155]	Ral GTPase-activating protein subunit alpha-2 OS=Mus musculus OX=10090 GN=Ralgapa2 PE=1 SV=2	0	1594.75	1.326	0.223	0.426	1.484	0.936	0.257	0.424768	0.0889618	0.471698	0.491466	0.9888	0.25134	0.996109	0.83565	0.999091	1	0.99999	0.991872	1128.2	189.9	362.4	1262.7	796.6	850.6	219	5.37	4.12	8.11	15.11	9.22		30.41	357.8	712.1	163.6
High	[R].GPCTLETLINPSPSIVDAK.[I]	1xCarbamidomethyl [C3]; 1xTMTpro [K19]; 1xTMTpro [N-Term]	1.72443e-07	2.82963e-05	1	1	1	1	A3KGS3	A3KGS3 [167-185]	A3KGS3 1xCarbamidomethyl [C169]	Ral GTPase-activating protein subunit alpha-2 OS=Mus musculus OX=10090 GN=Ralgapa2 PE=1 SV=2	0	2620.45	1.52	0.677	0.878	1.317	0.957	2.127	0.331564	0.890143	0.76335	0.619479	0.807907	0.0991491	0.986771	0.999952	0.999996	1	0.99991	0.851028	885.7	394.5	511.7	767.1	557.5	582.6	1239.1	12.15	2.64	0.83	10.17	1.26		17.52	267.7	586.6	343.5
High	[R].QAFLLPSCEISVTR.[K]	1xCarbamidomethyl [C8]; 1xTMTpro [N-Term]	1.27039e-05	2.82963e-05	1	1	1	1	A3KGS3	A3KGS3 [411-424]	A3KGS3 1xCarbamidomethyl [C418]	Ral GTPase-activating protein subunit alpha-2 OS=Mus musculus OX=10090 GN=Ralgapa2 PE=1 SV=2	0	1925.05	1.642	1.369	1.09	1.178	1.277	1.365	0.189763	0.576795	0.628797	0.617301	0.516483	0.415267	0.906736	0.999952	0.999526	1	0.99991	0.994122	277.8	231.7	184.4	199.3	216.2	169.2	231	4.75	16.41	13.43	2.81	3.15		4.94	88.5	174.6	182.9
High	[R].GCVTEEDNTNVK.[A]	1xCarbamidomethyl [C2]; 1xTMTpro [K12]; 1xTMTpro [N-Term]	0.000334896	2.82963e-05	1	1	1	1	A3KGS3	A3KGS3 [494-505]	A3KGS3 1xCarbamidomethyl [C495]	Ral GTPase-activating protein subunit alpha-2 OS=Mus musculus OX=10090 GN=Ralgapa2 PE=1 SV=2	0	1974.01	1.025	0.87	0.834	1.212	1.006	1.522	0.605101	0.96945	0.900094	0.64878	0.76001	0.27642	0.996109	0.999952	0.999996	1	0.99991	0.994122	284.7	241.6	231.6	336.7	279.5	277.8	422.9	7.64	8.16	9.67	9.9	4.56		10.23	99	163.9	202.3
High	[K].NAGLPLSTTSNEACK.[L]	1xCarbamidomethyl [C14]; 1xTMTpro [K15]; 1xTMTpro [N-Term]	1.21586e-07	2.82963e-05	1	1	1	2	A3KMP2	A3KMP2 [11-25]	A3KMP2 1xCarbamidomethyl [C24]	Tetratricopeptide repeat protein 38 OS=Mus musculus OX=10090 GN=Ttc38 PE=1 SV=2	0	2171.16	0.56	0.42	0.313	0.452	2.596	0.425	0.679168	0.446233	0.181914	0.1851	0.299826	0.620303	0.997316	0.999596	0.896816	0.820376	0.980456	0.995093	584.6	438	326.9	471.8	2709.5	1043.6	443	14.59	11.34	7	7.17	1.51		6.79	213.6	320.3	358.5
High	[K].DVGLPLCQALLEAENGNPDR.[V]	1xCarbamidomethyl [C7]; 1xTMTpro [N-Term]	3.78343e-11	2.82963e-05	1	1	1	2	A3KMP2	A3KMP2 [370-389]	A3KMP2 1xCarbamidomethyl [C376]	Tetratricopeptide repeat protein 38 OS=Mus musculus OX=10090 GN=Ttc38 PE=1 SV=2	0	2485.27	0.848	0.3	0.536	0.841	2.986	0.82	0.969388	0.23263	0.582911	0.695366	0.280922	0.821196	0.999984	0.961577	0.999526	1	0.970715	0.997925	953	337.3	602.8	945.4	3355.1	1123.7	921.5	14.03	11.06	8.7	8.66	22.97		6.06	346.8	524.2	323.6
High	[K].SLGGIEGCLSK.[L]	1xCarbamidomethyl [C8]; 1xTMTpro [K11]; 1xTMTpro [N-Term]	2.58142e-08	2.82963e-05	1	1	1	2	A3KMP2	A3KMP2 [42-52]	A3KMP2 1xCarbamidomethyl [C49]	Tetratricopeptide repeat protein 38 OS=Mus musculus OX=10090 GN=Ttc38 PE=1 SV=2	0	1728.98	0.455	0.274	0.506	0.75	2.865	0.352	0.446264	0.182056	0.519853	0.660143	0.346373	0.42367	0.996109	0.935482	0.999526	1	0.987609	0.994122	553.9	333.1	615.5	912.8	3487.7	1217.5	428.3	1.88	6.48	6.96	9.42	5.88		6.04	184.9	332.1	309.3
High	[R].LRDHLEAAGHMCVLR.[D]	1xCarbamidomethyl [C12]; 1xTMTpro [N-Term]	0.0021582	0.000117823	1	1	1	1	A4FUP9	A4FUP9 [22-36]	A4FUP9 1xCarbamidomethyl [C33]	Glycosyltransferase 1 domain-containing protein 1 OS=Mus musculus OX=10090 GN=Glt1d1 PE=2 SV=2	1	2082.1	0.771	2.373	1.599	0.982	1.776	1.848	0.911809	0.125802	0.267029	0.741938	0.193361	0.142615	0.999984	0.883666	0.956346	1	0.907753	0.916375	21.2	65.4	44.1	27.1	49	27.6	50.9	0.07	13.29	8.59	1.9	4.64			7	12.9	52.8
High	[R].GVSCGAGAEAQVSLAFK.[V]	1xCarbamidomethyl [C4]; 1xTMTpro [K17]; 1xTMTpro [N-Term]	1.91794e-07	2.82963e-05	1	1	1	1	A6H584	A6H584 [1265-1281]	A6H584 1xCarbamidomethyl [C1268]	Collagen alpha-5(VI) chain OS=Mus musculus OX=10090 GN=Col6a5 PE=1 SV=4	0	2260.23	0.843	0.545	0.836	0.691	1.139	5.619	0.777602	0.440884	0.832851	0.700769	0.58306	0.0120299	0.999984	0.999596	0.999996	1	0.99991	0.3815	290.5	187.8	288.1	238	392.5	344.6	1936.6	3.81	4.76	11.07	2.93	16.92		25.87	98.3	171.8	161.1
High	[R].ENNCPVGAR.[V]	1xCarbamidomethyl [C4]; 1xTMTpro [N-Term]	5.67216e-05	2.82963e-05	1	1	1	1	A6H584	A6H584 [1824-1832]	A6H584 1xCarbamidomethyl [C1827]	Collagen alpha-5(VI) chain OS=Mus musculus OX=10090 GN=Col6a5 PE=1 SV=4	0	1320.66	0.314	0.055	0.049	0.106	0.115	22.45	0.190999	2.29127e-05	8.68541e-06	0.00117377	0.00355571	0.49124	0.907793	0.0121024	0.00538161	0.0366106	0.134782	0.994122	174.6	30.4	27.4	59.2	64.3	556.6	12494.5	78.04	8	27.75	0.01	47.34		60.57	107	57	25.5
High	[K].TGCVDTK.[E]	1xCarbamidomethyl [C3]; 1xTMTpro [K7]; 1xTMTpro [N-Term]	0.00558918	0.000371496	1	1	1	1	A6H584	A6H584 [465-471]	A6H584 1xCarbamidomethyl [C467]	Collagen alpha-5(VI) chain OS=Mus musculus OX=10090 GN=Col6a5 PE=1 SV=4	0	1388.77	0.588	0.399	0.295	0.361	0.388	29.641	0.695958	0.193256	0.0504126	0.0901764	0.204135	0.390424	0.998922	0.942533	0.632267	0.618745	0.916953	0.994122	194.1	131.6	97.4	119.2	128.1	330.1	9783.7	47.91	11.48	15.21	0.76	27.04		27.79	91	82.9	126.6
High	[K].VNVCTR.[A]	1xCarbamidomethyl [C4]; 1xTMTpro [N-Term]	0.042538	0.00303795	1	1	1	1	A6H5Y3	A6H5Y3 [501-506]	A6H5Y3 1xCarbamidomethyl [C504]	Methionine synthase OS=Mus musculus OX=10090 GN=Mtr PE=1 SV=1	0	1052.58	1.381	0.836	0.374	1.052	1.274	1.215	0.291571	0.934978	0.322772	0.812315	0.502421	0.491539	0.973801	0.999952	0.982386	1	0.99991	0.994122	718.8	435	194.6	547.7	663.3	520.5	632.2	2.02	13.87	4.93	10.22	10.26		9.45	240.2	430.6	349.7
High	[R].EAAQEACR.[S]	1xCarbamidomethyl [C7]; 1xTMTpro [N-Term]	0.00011319	2.82963e-05	1	1	1	1	A6H611	A6H611 [134-141]	A6H611 1xCarbamidomethyl [C140]	Mitochondrial intermediate peptidase OS=Mus musculus OX=10090 GN=Mipep PE=1 SV=1	0	1238.61	0.793	0.621	1.287	1.432	1.845	0.096	0.957416	0.787574	0.503009	0.527222	0.371909	0.0372395	0.999984	0.999952	0.999299	1	0.990086	0.643948	600.4	470.5	974.8	1084.9	1397.5	757.4	72.9	5.83	9.35	2.57	16.15	3.04		2.21	189.8	380.2	445.9
High	[K].IGHPDPAFREAAQEACR.[S]	1xCarbamidomethyl [C16]; 1xTMTpro [N-Term]	0.000410911	2.82963e-05	1	1	1	1	A6H611	A6H611 [125-141]	A6H611 1xCarbamidomethyl [C140]	Mitochondrial intermediate peptidase OS=Mus musculus OX=10090 GN=Mipep PE=1 SV=1	1	2229.12	0.705	1.09	2.664	2.142	0.945	0.718	0.886194	0.817909	0.0496171	0.163651	0.926213	0.935177	0.999984	0.999952	0.629347	0.791955	0.99999	0.9999	140.7	217.3	531.1	427.2	188.3	199.4	143.2	5.08	3.23	9.68	13.1	21.42		66.48	44.7	88.6	188.4
High	[K].GEVWCNDIR.[K]	1xCarbamidomethyl [C5]; 1xTMTpro [N-Term]	8.74403e-05	2.82963e-05	1	1	1	1	A6H611	A6H611 [408-416]	A6H611 1xCarbamidomethyl [C412]	Mitochondrial intermediate peptidase OS=Mus musculus OX=10090 GN=Mipep PE=1 SV=1	0	1452.72	1.148	0.628	0.751	1.502	2.056	0.264	0.602107	0.758683	0.969301	0.580606	0.307947	0.22641	0.996109	0.999952	0.999996	1	0.981188	0.978168	1037.9	567.9	679.5	1358.2	1859.5	904.3	238.4	7.51	3.89	1.15	25.04	23.97		7.24	324.2	665.1	490.1
High	[R].ANKPQQDCHFTIR.[G]	1xCarbamidomethyl [C8]; 1xTMTpro [K3]; 1xTMTpro [N-Term]	3.0895e-05	2.82963e-05	1	1	1	2	A6H611	A6H611 [439-451]	A6H611 1xCarbamidomethyl [C446]	Mitochondrial intermediate peptidase OS=Mus musculus OX=10090 GN=Mipep PE=1 SV=1	1	2223.19	1.009	0.835	1.474	1.522	1.663	0.361	0.556769	0.95331	0.32558	0.485305	0.391505	0.553105	0.996109	0.999952	0.982386	1	0.993558	0.995093	645.5	533.9	942.8	973.5	1063.7	639.7	231.1	20.91	0.33	2.87	11.08	6.81		29.89	183.2	455.2	474.7
High	[K].ECFLQDPFNR.[A]	1xCarbamidomethyl [C2]; 1xTMTpro [N-Term]	0.00014763	2.82963e-05	1	1	1	1	A6H611	A6H611 [646-655]	A6H611 1xCarbamidomethyl [C647]	Mitochondrial intermediate peptidase OS=Mus musculus OX=10090 GN=Mipep PE=1 SV=1	0	1629.8	2.992	0.558	1.024	1.248	1.372	0.648	0.144712	0.682412	0.677033	0.735948	0.534619	0.891964	0.854427	0.999952	0.999996	1	0.99991	0.998093	2375.4	442.7	813.3	990.4	1089	793.9	514.1	16.31	2.72	3.03	13.22	25.04		16.53	696.9	1620.6	385.2
High	[R].ACSTPPGPQTVLIFDELSDCLCR.[V]	3xCarbamidomethyl [C2; C20; C22]; 1xTMTpro [N-Term]	4.49096e-07	2.82963e-05	1	1	1	1	A6H611	A6H611 [93-115]	A6H611 3xCarbamidomethyl [C94; C112; C114]	Mitochondrial intermediate peptidase OS=Mus musculus OX=10090 GN=Mipep PE=1 SV=1	0	2940.42	1.134	0.8	1.398	1.104	1.697	1.139	0.484923	0.743833	0.397244	0.60033	0.224084	0.485546	0.996109	0.999952	0.994179	1	0.935381	0.994122	180.7	127.5	222.8	176	270.5	159.4	181.6	16.02	12.92	13.51	7.29	4.27		11.93	66.7	98	103.2
High	[R].TLKCELQVGLQPGQAEQLTASDPHWLTTGR.[Y]	1xCarbamidomethyl [C4]; 1xTMTpro [K3]; 1xTMTpro [N-Term]	1.90812e-10	2.82963e-05	1	1	1	1	A6H630	A6H630 [400-429]	A6H630 1xCarbamidomethyl [C403]	Damage-control phosphatase ARMT1 OS=Mus musculus OX=10090 GN=Armt1 PE=1 SV=1	1	3943.1	0.825	1.285	0.918	0.581	1.129	1.077	0.746465	0.523277	0.63936	0.583379	0.646862	0.528836	0.999984	0.999952	0.999526	1	0.99991	0.994122	441	686.9	490.6	310.7	603.5	534.4	575.4	2.26	15.16	1.3	6.74	7.25		8.58	147.6	263.7	678.5
High	[K].SSNLESMSTCGACWEAYAR.[M]	2xCarbamidomethyl [C10; C13]; 1xTMTpro [N-Term]	1.28649e-11	2.82963e-05	1	1	1	2	A6H630	A6H630 [304-322]	A6H630 2xCarbamidomethyl [C313; C316]	Damage-control phosphatase ARMT1 OS=Mus musculus OX=10090 GN=Armt1 PE=1 SV=1	0	2484.09	0.394	1.412	1.089	1.089	1.221	0.318	0.391578	0.452242	0.474202	0.779785	0.558537	0.390798	0.996089	0.999596	0.999091	1	0.99991	0.994122	201.8	724.1	558.7	558.7	626.3	512.9	162.9	7.27	11.78	4.68	3.52	2.13		9.02	70	116.5	698.2
High	[K].DILGVCSDPLVLAQQLTHIELER.[V]	1xCarbamidomethyl [C6]; 1xTMTpro [N-Term]	0.000895359	5.93436e-05	1	1	1	1	A6H650	A6H650 [207-229]	A6H650 1xCarbamidomethyl [C212]	RasGEF domain family, member 1A OS=Mus musculus OX=10090 GN=Rasgef1a PE=1 SV=1	0	2923.59	1.388	1.241	1.3	1.086	1.541	1.65	0.300973	0.617538	0.418852	0.657075	0.288498	0.276876	0.975307	0.999952	0.999091	1	0.975655	0.994122	152.9	136.7	143.2	119.7	169.7	110.1	181.7	0.16	12.17	4.14	10.82	8.66		11.3	50.3	93	132.2
High	[R].VGQICLEQR.[Q]	1xCarbamidomethyl [C5]; 1xTMTpro [N-Term]	0.00749909	0.000474396	1	1	1	2	A6H650	A6H650 [90-98]	A6H650 1xCarbamidomethyl [C94]	RasGEF domain family, member 1A OS=Mus musculus OX=10090 GN=Rasgef1a PE=1 SV=1	0	1406.77	0.18	4.393	0.374	0.289	0.275	0.285	0.0195027	0.174138	0.332439	0.0586423	0.141875	0.343738	0.353617	0.92883	0.983468	0.502772	0.827516	0.994122	114.1	2778.7	236.6	182.9	173.8	632.6	180.4	16.25	5.18	13.36	10.27	4.47		19.8	42.2	61.8	2376.3
High	[K].LTYLGCMK.[V]	1xCarbamidomethyl [C6]; 1xTMTpro [K8]; 1xTMTpro [N-Term]	0.000361259	2.82963e-05	1	1	1	1	A6H6A9	A6H6A9 [134-141]	A6H6A9 1xCarbamidomethyl [C139]	Rab GTPase-activating protein 1-like OS=Mus musculus OX=10090 GN=Rabgap1l PE=1 SV=1	0	1593.9	0.58	0.811	0.784	1.445	1.061	0.812	0.581146	0.798173	0.835798	0.738332	0.849765	0.964544	0.996109	0.999952	0.999996	1	0.99991	0.999948	1048.4	1464	1415.3	2609.2	1915.8	1806.2	1466.1	1.84	2.88	5.05	16.87	1.37		7.43	340.9	645.4	1325.4
High	[R].LMEQACNIK.[V]	1xCarbamidomethyl [C6]; 1xTMTpro [K9]; 1xTMTpro [N-Term]	2.57468e-05	2.82963e-05	1	1	1	1	A6H6A9	A6H6A9 [772-780]	A6H6A9 1xCarbamidomethyl [C777]	Rab GTPase-activating protein 1-like OS=Mus musculus OX=10090 GN=Rabgap1l PE=1 SV=1	0	1714.95	0.69	0.831	0.725	1.026	1.113	1.749	0.851152	0.832864	0.753957	0.796211	0.627333	0.203477	0.999984	0.999952	0.999996	1	0.99991	0.96658	186.7	224.8	196.1	277.8	301.3	270.6	473.4	18.18	6.56	8.1	11.58	15.54		8.85	70	99.7	190.4
High	[R].VLIACHADVNAADNEKR.[S]	1xCarbamidomethyl [C5]; 1xTMTpro [K16]; 1xTMTpro [N-Term]	0.0512067	0.00366099	1	1	1	1	A6H6J9	A6H6J9 [37-53]	A6H6J9 1xCarbamidomethyl [C41]	Ankyrin repeat domain 50 OS=Mus musculus OX=10090 GN=Ankrd50 PE=1 SV=1	1	2504.35	0.603	1.739	0.575	0.532	0.833	1.11	0.834431	0.328026	0.718093	0.423079	0.927339	0.471187	0.999984	0.989785	0.999996	0.991409	0.99999	0.994122	243.4	702.4	232.2	215	336.4	403.8	448.3	0.75	11	0.5	4.83	7.53		1.77	80.6	147.1	673.6
High	[R].LMPGCEVIQATPYGR.[C]	1xCarbamidomethyl [C5]; 1xTMTpro [N-Term]	6.03956e-07	2.82963e-05	1	1	1	1	A6H8H2	A6H8H2 [111-125]	A6H8H2 1xCarbamidomethyl [C115]	DENN domain-containing protein 4C OS=Mus musculus OX=10090 GN=Dennd4c PE=1 SV=1	0	1996.03	1.064	0.663	1.483	1.885	0.901	1.236	0.539234	0.646687	0.21768	0.240911	0.874423	0.456516	0.996109	0.999952	0.926199	0.88745	0.999916	0.994122	324.9	202.6	452.9	575.6	275.2	305.4	377.3	10.99	5.94	10.59	26.06	28.38		13.86	99	213.4	172.3
High	[R].CANVNNSSTTSQR.[I]	1xCarbamidomethyl [C1]; 1xTMTpro [N-Term]	1.56356e-08	2.82963e-05	1	1	1	2	A6H8H2	A6H8H2 [126-138]	A6H8H2 1xCarbamidomethyl [C126]	DENN domain-containing protein 4C OS=Mus musculus OX=10090 GN=Dennd4c PE=1 SV=1	0	1742.84	0.558	0.481	0.6	1.174	1.262	0.552	0.687312	0.358049	0.622744	0.620383	0.535807	0.809418	0.998376	0.995378	0.999526	1	0.99991	0.997925	191.8	165.3	206.3	403.6	433.9	343.9	189.9	23.45	35.94	1.67	9.18	6.1		30.19	74.7	98.6	113.1
High	[R].LYQQLCSVHR.[K]	1xCarbamidomethyl [C6]; 1xTMTpro [N-Term]	0.000256851	2.82963e-05	1	1	1	1	A6H8H2	A6H8H2 [522-531]	A6H8H2 1xCarbamidomethyl [C527]	DENN domain-containing protein 4C OS=Mus musculus OX=10090 GN=Dennd4c PE=1 SV=1	0	1607.86	1.245	1.113	1.673	1.401	1.158	1.74	0.41605	0.819135	0.201601	0.372567	0.622573	0.255017	0.996109	0.999952	0.917867	0.971935	0.99991	0.994088	170.8	152.7	229.6	192.3	158.9	137.2	238.7	0.42	8.79	20.91	6.44	2.42		23.24	56.1	104.1	127.3
High	[K].SPELFLCYR.[R]	1xCarbamidomethyl [C7]; 1xTMTpro [N-Term]	1.74778e-05	2.82963e-05	1	1	1	1	A6H8H2	A6H8H2 [82-90]	A6H8H2 1xCarbamidomethyl [C88]	DENN domain-containing protein 4C OS=Mus musculus OX=10090 GN=Dennd4c PE=1 SV=1	0	1488.78	1.075	0.706	1.179	1.336	1.417	1.417	0.495633	0.937362	0.48229	0.590577	0.523218	0.363302	0.996109	0.999952	0.999091	1	0.99991	0.994122	689	452.4	756.1	856.6	908.3	641	908.3	0.52	0.29	16.25	18.1	13.2		5.97	227.8	417.1	400.5
High	[R].SKPGCSMPEIWDVEDPDNAGK.[T]	1xCarbamidomethyl [C5]; 2xTMTpro [K2; K21]; 1xTMTpro [N-Term]	0.00133491	5.93436e-05	1	1	1	1	A6X919	A6X919 [694-714]	A6X919 1xCarbamidomethyl [C698]	Probable C-mannosyltransferase DPY19L1 OS=Mus musculus OX=10090 GN=Dpy19l1 PE=1 SV=1	0	3244.64	0.632	2.358	0.725	0.337	0.737	1.074	0.976308	0.193197	0.9746	0.113874	0.9143	0.549788	0.999984	0.942533	0.999996	0.683201	0.999916	0.995093	275.6	1027.5	316	147	321.2	435.8	467.9	6.1	20.39	4.51	7.51	17.3		1.9	94.8	160.4	1053.9
High	[K].GVVPLAGTNGETTTQGLDGLSERCAQYKK.[D]	1xCarbamidomethyl [C24]; 2xTMTpro [K28; K29]; 1xTMTpro [N-Term]	1.7791e-08	2.82963e-05	2	2	1	2	A6ZI46; P05064	A6ZI46 [167-195]; P05064 [112-140]	A6ZI46 1xCarbamidomethyl [C190]; P05064 1xCarbamidomethyl [C135]	Fructose-bisphosphate aldolase OS=Mus musculus OX=10090 GN=Aldoart1 PE=1 SV=1 Fructose-bisphosphate aldolase A OS=Mus musculus OX=10090 GN=Aldoa PE=1 SV=2	2	3963.14	0.704	1.532	1.055	0.403	0.437	0.6	0.732663	0.974139	0.971953	0.145511	0.182493	0.798206	0.999984	0.999952	0.999996	0.752331	0.893468	0.997925	1347.7	2932.1	2018.6	770.9	835.9	1913.8	1149	7.64	3.59	13.75	21.48	2.36		11.09	468.6	775.8	2667.8
High	[R].YASICQQNGIVPIVEPEILPDGDHDLSCCQYVTEK.[V]	1xCarbamidomethyl [C5]; 2xNethylmaleimide [C28; C29]; 1xTMTpro [K35]; 1xTMTpro [N-Term]	0.0207263	0.00129435	1	1	1	1	A6ZI46	A6ZI46 [229-263]	A6ZI46 1xCarbamidomethyl [C233]	Fructose-bisphosphate aldolase OS=Mus musculus OX=10090 GN=Aldoart1 PE=1 SV=1	0	4792.34	0.734	0.841	1.207	1.654	2.36	1.715	0.933291	0.767719	0.506572	0.193976	0.101413	0.229206	0.999984	0.999952	0.999496	0.831658	0.73991	0.97901	48.9	56	80.4	110.1	157.1	66.6	114.2	10.91	4.92	14.94	46.13	10.45		24.69	17.4	27.5	48
High	[R].AHGCAPK.[L]	1xCarbamidomethyl [C4]; 1xTMTpro [K7]; 1xTMTpro [N-Term]	0.000656913	2.82963e-05	1	1	1	2	A7MCT6	A7MCT6 [135-141]	A7MCT6 1xCarbamidomethyl [C138]	Ethanolamine kinase 2 OS=Mus musculus OX=10090 GN=Etnk2 PE=1 SV=1	0	1348.77	0.522	0.217	0.124	0.092	4.799	0.099	0.654578	0.0916322	0.00380629	5.15233e-05	0.0621896	0.0316653	0.996109	0.840892	0.203736	0.00330036	0.614181	0.598356	280.3	116.6	66.7	49.3	2576.6	536.9	53.3	3.92	0.8	2.21	6.16	2.39			89.8	175.1	104
High	[K].AVASAGCWEPPGPPR.[A]	1xCarbamidomethyl [C7]; 1xTMTpro [N-Term]	5.3166e-09	2.82963e-05	1	1	1	2	A7MCT6	A7MCT6 [33-47]	A7MCT6 1xCarbamidomethyl [C39]	Ethanolamine kinase 2 OS=Mus musculus OX=10090 GN=Etnk2 PE=1 SV=1	0	1855.94	0.35	0.605	0.805	0.53	4.897	0.524	0.269076	0.652291	0.857177	0.500654	0.0268622	0.795329	0.965783	0.999952	0.999996	1	0.428678	0.997851	159.3	275.3	366.6	241.3	2229.5	455.2	238.7	41.08	5.42	9.48	11.68	11.06		15.03	38.9	130.5	235
High	[R].AAVPCFSVTVEQDDILPGALR.[L]	1xCarbamidomethyl [C5]; 1xTMTpro [N-Term]	1.62676e-10	2.82963e-05	1	1	1	2	A7MCT6	A7MCT6 [48-68]	A7MCT6 1xCarbamidomethyl [C52]	Ethanolamine kinase 2 OS=Mus musculus OX=10090 GN=Etnk2 PE=1 SV=1	0	2562.36	0.961	0.695	0.811	0.472	3.208	2.163	0.620814	0.868279	0.795363	0.325719	0.0944611	0.157636	0.996109	0.999952	0.999996	0.948712	0.723694	0.931932	464	335.5	391.7	227.8	1549	482.9	1044.4	15.55	1.07	17.01	0.36	10.2		4.42	170.7	252.5	299.9
High	[R].TNADFLQELSDVTACTK.[A]	1xCarbamidomethyl [C15]; 1xTMTpro [K17]; 1xTMTpro [N-Term]	1.49143e-06	2.82963e-05	1	1	1	1	A8C756	A8C756 [1416-1432]	A8C756 1xCarbamidomethyl [C1430]	Thyroid adenoma-associated protein homolog OS=Mus musculus OX=10090 GN=Thada PE=1 SV=1	0	2521.31	1.045	1.087	0.759	0.979	1.14	1.165	0.501583	0.762473	0.953873	0.782517	0.614128	0.462326	0.996109	0.999952	0.999996	1	0.99991	0.994122	365.1	379.8	265.2	342.1	398.4	349.5	407.1	14.82	3.62	3.89	2.1	7.66		2	133.6	199.7	328.4
High	[R].EMQVAALTVCHQDMETLR.[S]	1xCarbamidomethyl [C10]; 1xTMTpro [N-Term]	2.70624e-10	2.82963e-05	1	1	1	1	A8C756	A8C756 [8-25]	A8C756 1xCarbamidomethyl [C17]	Thyroid adenoma-associated protein homolog OS=Mus musculus OX=10090 GN=Thada PE=1 SV=1	0	2436.2	0.975	0.869	1.37	1.392	1.259	1.807	0.636417	0.877679	0.337071	0.469574	0.502787	0.190427	0.996109	0.999952	0.984191	1	0.99991	0.956358	449.5	400.8	631.8	641.8	580.8	461.2	833.6	19.17	0.42	9.58	14.66	0.71		0.12	169.7	238.3	356.6
High	[K].QGLIHQHCQVR.[I]	1xCarbamidomethyl [C8]; 1xTMTpro [N-Term]	1.08308e-05	2.82963e-05	1	1	1	2	A8C756	A8C756 [619-629]	A8C756 1xCarbamidomethyl [C626]	Thyroid adenoma-associated protein homolog OS=Mus musculus OX=10090 GN=Thada PE=1 SV=1	0	1679.91	0.81	1.089	0.755	1.635	1.459	2.551	0.866753	0.827942	0.897898	0.22497	0.385452	0.133582	0.999984	0.999952	0.999996	0.871943	0.992635	0.908755	104.3	140.1	97.1	210.4	187.7	128.6	328.2	1.46	0.49	12.21	22.26	1.21		15.07	34.7	62.7	124.7
High	[R].VHCITR.[A]	1xCarbamidomethyl [C3]; 1xTMTpro [N-Term]	0.0237006	0.00169995	1	1	1	2	A8C756	A8C756 [915-920]	A8C756 1xCarbamidomethyl [C917]	Thyroid adenoma-associated protein homolog OS=Mus musculus OX=10090 GN=Thada PE=1 SV=1	0	1089.62	0.528	0.844	0.606	1.814	1.594	0.361	0.568704	0.928036	0.638802	0.253965	0.288043	0.358216	0.996109	0.999952	0.999526	0.901673	0.975551	0.994122	179.3	286.2	205.8	615.6	540.6	339.3	122.3	0.36	6.6	2.11	17.57	2.42		12.51	58.9	109.2	242.3
High	[R].EIMCQSLTWR.[K]	1xCarbamidomethyl [C4]; 1xTMTpro [N-Term]	4.2548e-06	2.82963e-05	1	1	1	1	A8Y5H7	A8Y5H7 [296-305]	A8Y5H7 1xCarbamidomethyl [C299]	SEC14-like protein 1 OS=Mus musculus OX=10090 GN=Sec14l1 PE=1 SV=1	0	1627.83	0.757	2.118	0.832	1.38	0.882	0.857	0.985736	0.190518	0.771556	0.474232	0.952064	0.750636	0.999984	0.940837	0.999996	1	0.99999	0.995093	320.6	896.9	352.2	584.4	373.4	423.4	362.7	9.68	7.36	6.32	15.68	10.09		5.18	113.1	181.9	755.2
High	[K].FHTMPACAATNLPR.[V]	1xCarbamidomethyl [C7]; 1xTMTpro [N-Term]	7.13206e-06	2.82963e-05	1	1	1	1	A8Y5H7	A8Y5H7 [638-651]	A8Y5H7 1xCarbamidomethyl [C644]	SEC14-like protein 1 OS=Mus musculus OX=10090 GN=Sec14l1 PE=1 SV=1	0	1890.96	4.337	1.224	1.116	1.156	0.837	1.222	0.00860085	0.568179	0.554572	0.592564	0.973792	0.456174	0.21864	0.999952	0.999526	1	0.99999	0.994122	1337.8	377.7	344.2	356.6	258.1	308.5	377.1	38.14	9.55	14.53	15.86	2.66		12.51	581.1	616.5	313.1
High	[R].LACPPDYALTLR.[R]	1xCarbamidomethyl [C3]; 1xTMTpro [N-Term]	2.38636e-05	2.82963e-05	1	1	1	1	B0F2B4	B0F2B4 [867-878]	B0F2B4 1xCarbamidomethyl [C869]	Neuroligin 4-like OS=Mus musculus OX=10090 GN=Nlgn4l PE=1 SV=1	0	1693.93	0.385	3.159	0.431	0.307	0.283	0.46	0.338329	0.423226	0.343758	0.0417901	0.110156	0.635254	0.987736	0.999596	0.986073	0.419724	0.761966	0.995093	412.9	3390.7	462.4	329.7	303.6	1073.5	493.5	5.2	11.8	7.56	13.81	3.13		2.51	141.1	241.8	3270.2
High	[R].FAPVCPQHLDER.[A]	1xCarbamidomethyl [C5]; 1xTMTpro [N-Term]	3.28633e-06	2.82963e-05	1	1	1	1	B0F2B4	B0F2B4 [89-100]	B0F2B4 1xCarbamidomethyl [C93]	Neuroligin 4-like OS=Mus musculus OX=10090 GN=Nlgn4l PE=1 SV=1	0	1772.91	0.398	3.323	0.688	0.402	0.477	0.556	0.281307	0.0605169	0.856638	0.130832	0.326406	0.862474	0.968857	0.779051	0.999996	0.72567	0.986077	0.998045	124.4	1039.4	215	125.7	149.3	312.8	173.8	2.4	1.87	19.31	14.53	3.25		10.53	40.3	76.9	934.3
High	[R].DENVYECVAQNSVGEITIHAK.[L]	1xCarbamidomethyl [C7]; 1xTMTpro [K21]; 1xTMTpro [N-Term]	3.6484e-13	2.82963e-05	1	1	1	1	B0V2N1	B0V2N1 [101-121]	B0V2N1 1xCarbamidomethyl [C107]	Receptor-type tyrosine-protein phosphatase S OS=Mus musculus OX=10090 GN=Ptprs PE=1 SV=1	0	2984.53	0.192	2.656	0.226	0.147	0.244	0.673	0.033322	0.166688	0.0477487	0.00467806	0.0532211	0.973913	0.471408	0.919468	0.62135	0.101091	0.573177	0.999948	91.1	1262.9	107.3	69.7	116.1	475.5	320	3.23	1.01	2.24	2	4.41		18.27	30.7	54.1	1128.3
High	[R].FITASLPCNKFK.[N]	1xCarbamidomethyl [C8]; 2xTMTpro [K10; K12]; 1xTMTpro [N-Term]	0.00610568	0.000397541	1	1	1	1	B0V2N1	B0V2N1 [1656-1667]	B0V2N1 1xCarbamidomethyl [C1663]	Receptor-type tyrosine-protein phosphatase S OS=Mus musculus OX=10090 GN=Ptprs PE=1 SV=1	1	2338.38	0.555	2.82	0.525	0.752	0.546	0.424	0.685251	0.418767	0.607606	0.628676	0.401853	0.608318	0.998376	0.999596	0.999526	1	0.997549	0.995093	621.7	3161.5	588.1	842.8	612.4	1121.1	475.8	19.46	13.91	17.94	61.13	27.55		8.84	235.2	328.9	3095.2
High	[K].EQFGQDGPISVHCSAGVGR.[T]	1xCarbamidomethyl [C13]; 1xTMTpro [N-Term]	1.09769e-12	2.82963e-05	2	2	1	1	B0V2N1; Q64487	B0V2N1 [1827-1845]; Q64487 [1832-1850]	B0V2N1 1xCarbamidomethyl [C1839]; Q64487 1xCarbamidomethyl [C1844]	Receptor-type tyrosine-protein phosphatase S OS=Mus musculus OX=10090 GN=Ptprs PE=1 SV=1 Receptor-type tyrosine-protein phosphatase delta OS=Mus musculus OX=10090 GN=Ptprd PE=1 SV=3	0	2305.13	0.357	3.005	0.481	1.052	0.889	0.377	0.233215	0.169588	0.563189	0.774775	0.887679	0.508606	0.945895	0.922063	0.999526	1	0.999916	0.994122	198.8	1671	267.6	585	494.2	556.1	209.8	11.42	5.92	9.42	4.69	8.32		3.72	71	111.4	1545.6
High	[K].TKEQFGQDGPISVHCSAGVGR.[T]	1xCarbamidomethyl [C15]; 1xTMTpro [K2]; 1xTMTpro [N-Term]	2.22485e-12	2.82963e-05	2	2	1	2	B0V2N1; Q64487	B0V2N1 [1825-1845]; Q64487 [1830-1850]	B0V2N1 1xCarbamidomethyl [C1839]; Q64487 1xCarbamidomethyl [C1844]	Receptor-type tyrosine-protein phosphatase S OS=Mus musculus OX=10090 GN=Ptprs PE=1 SV=1 Receptor-type tyrosine-protein phosphatase delta OS=Mus musculus OX=10090 GN=Ptprd PE=1 SV=3	1	2838.48	0.247	2.989	0.266	0.558	0.571	0.281	0.0667331	0.293175	0.11896	0.437534	0.506576	0.274851	0.648962	0.981709	0.816258	0.994178	0.99991	0.994122	204.6	2478.5	220.9	462.3	473.7	829.1	233	3.5	16.02	9.39	10.39	2.68		10.59	69.1	121.3	2463.5
High	[R].SGALQIESSEETDQGKYECVATNSAGVR.[Y]	1xCarbamidomethyl [C19]; 1xTMTpro [K16]; 1xTMTpro [N-Term]	1.57937e-11	2.82963e-05	1	1	1	1	B0V2N1	B0V2N1 [189-216]	B0V2N1 1xCarbamidomethyl [C207]	Receptor-type tyrosine-protein phosphatase S OS=Mus musculus OX=10090 GN=Ptprs PE=1 SV=1	1	3594.78	0.19	2.011	0.234	0.159	0.207	0.4	0.0548641	0.255043	0.0521949	0.00571314	0.0359345	0.552552	0.593195	0.970166	0.639194	0.116137	0.490054	0.995093	91.5	971	112.9	76.9	99.9	482.9	193.3	20.12	10.12	6.54	4.78	4.89		8.99	34.8	48.2	925.3
High	[K].DQIGVSGGVASFVCQATGDPKPR.[V]	1xCarbamidomethyl [C14]; 1xTMTpro [K21]; 1xTMTpro [N-Term]	2.31099e-12	2.82963e-05	1	1	1	1	B0V2N1	B0V2N1 [41-63]	B0V2N1 1xCarbamidomethyl [C54]	Receptor-type tyrosine-protein phosphatase S OS=Mus musculus OX=10090 GN=Ptprs PE=1 SV=1	1	2954.56	0.316	2.656	0.539	0.252	0.272	0.539	0.220171	0.596643	0.592975	0.0281255	0.0681872	0.817958	0.937805	0.999952	0.999526	0.334269	0.638574	0.997925	418.2	3519	714.6	333.5	359.8	1324.7	714.1	1.97	1.05	2.29	6.55	6.9		9.8	139.7	250.6	3144.8
High	[K].TCNPPDAGPIVVHCSAGVGR.[T]	2xCarbamidomethyl [C2; C14]; 1xTMTpro [N-Term]	4.78413e-10	2.82963e-05	1	1	1	1	B0V2N1	B0V2N1 [1535-1554]	B0V2N1 2xCarbamidomethyl [C1536; C1548]	Receptor-type tyrosine-protein phosphatase S OS=Mus musculus OX=10090 GN=Ptprs PE=1 SV=1	0	2368.18	0.536	1.998	0.982	0.626	0.493	0.705	0.48463	0.245541	0.753452	0.511916	0.349222	0.964095	0.996109	0.967205	0.999996	1	0.989079	0.999948	118.2	440.4	216.4	137.9	108.6	220.4	155.4	10.71	4.84	2.45	4.02	16.06		1.19	36.1	77.5	377.5
High	[R].VKTCNPPDAGPIVVHCSAGVGR.[T]	2xCarbamidomethyl [C4; C16]; 1xTMTpro [K2]; 1xTMTpro [N-Term]	6.05448e-10	2.82963e-05	1	1	1	1	B0V2N1	B0V2N1 [1533-1554]	B0V2N1 2xCarbamidomethyl [C1536; C1548]	Receptor-type tyrosine-protein phosphatase S OS=Mus musculus OX=10090 GN=Ptprs PE=1 SV=1	1	2899.55	0.49	3.526	0.974	0.566	0.461	0.804	0.44351	0.0385244	0.759641	0.352375	0.247566	0.849317	0.996109	0.733169	0.999996	0.963961	0.951224	0.997925	148.5	1067.5	294.7	171.3	139.6	302.7	243.5	0.3	4.19	1.88	5.09	0.59		7.64	48.8	90.4	919.3
High	[K].ATQRPPYCDGTHK.[S]	1xCarbamidomethyl [C8]; 1xTMTpro [K13]; 1xTMTpro [N-Term]	4.66482e-07	2.82963e-05	1	1	1	2	B1AR13	B1AR13 [112-124]	B1AR13 1xCarbamidomethyl [C119]	CDGSH iron-sulfur domain-containing protein 3, mitochondrial OS=Mus musculus OX=10090 GN=Cisd3 PE=1 SV=1	1	2139.13	1.716	0.339	1.03	1.199	1.024	0.473	0.267321	0.245356	0.642364	0.759791	0.875885	0.637651	0.965783	0.967205	0.999526	1	0.999916	0.995093	1347.4	266.4	808.7	940.9	804	785.1	371	8.04	3.61	7.4	0.25	4.67		14.57	419.3	866.7	242.4
High	[K].NQPFCDGSHFFQR.[T]	1xCarbamidomethyl [C5]; 1xTMTpro [N-Term]	2.10272e-08	2.82963e-05	1	1	1	4	B1AR13	B1AR13 [77-89]	B1AR13 1xCarbamidomethyl [C81]	CDGSH iron-sulfur domain-containing protein 3, mitochondrial OS=Mus musculus OX=10090 GN=Cisd3 PE=1 SV=1	0	1943.91	2.322	0.517	1.076	1.03	0.726	0.413	0.398593	0.591599	0.755706	0.951088	0.656446	0.572546	0.996109	0.999952	0.999996	1	0.99991	0.995093	3036	676	1407.1	1347	949.1	1307.6	539.5	6.55	7.08	7.53	11.13	1.79		48.85	954.8	1932.3	570.3
High	[R].TVALCTCK.[A]	2xCarbamidomethyl [C5; C7]; 1xTMTpro [K8]; 1xTMTpro [N-Term]	0.000296649	2.82963e-05	1	1	1	1	B1AR13	B1AR13 [104-111]	B1AR13 2xCarbamidomethyl [C108; C110]	CDGSH iron-sulfur domain-containing protein 3, mitochondrial OS=Mus musculus OX=10090 GN=Cisd3 PE=1 SV=1	0	1560.87	0.561	0.327	0.813	1.31	1.443	0.121	0.655121	0.266175	0.996759	0.765301	0.800006	0.0423314	0.996109	0.973941	0.999996	1	0.99991	0.674975	775.6	452.1	1123.8	1810.4	1994.7	1382.1	167.1	4.44	14.54	11.54	0.79	0.58		14.56	247.6	486.3	444.6
High	[R].TVALCTCKATQRPPYCDGTHK.[S]	3xCarbamidomethyl [C5; C7; C16]; 2xTMTpro [K8; K21]; 1xTMTpro [N-Term]	0.00961194	0.000605469	1	1	1	1	B1AR13	B1AR13 [104-124]	B1AR13 3xCarbamidomethyl [C108; C110; C119]	CDGSH iron-sulfur domain-containing protein 3, mitochondrial OS=Mus musculus OX=10090 GN=Cisd3 PE=1 SV=1	1	3376.77	0.767	0.271	1.094	1.245	0.727	0.278	0.825296	0.164506	0.877817	0.865435	0.60206	0.23582	0.999984	0.918091	0.999996	1	0.99991	0.984785	1290.8	455.5	1841.4	2095.5	1224.4	1683.5	468.2	8.91	12.08	12.81	0.1	15.41		19.13	399.2	835.4	440.2
High	[R].HLCEPGADGSETFADGVPR.[E]	1xCarbamidomethyl [C3]; 1xTMTpro [N-Term]	3.82159e-05	2.82963e-05	1	1	1	1	B1AR17	B1AR17 [1514-1532]	B1AR17 1xCarbamidomethyl [C1516]	DNA helicase OS=Mus musculus OX=10090 GN=Chd3 PE=1 SV=1	0	2319.1	0.705	1.436	1.305	1.308	0.695	1.368	0.892439	0.483137	0.39923	0.464916	0.625151	0.459564	0.999984	0.999596	0.994179	1	0.99991	0.994122	141.3	287.7	261.5	262.1	139.2	200.4	274	12.63	7.67	11.35	19.08	4.36		28.21	50.9	78.5	241.7
High	[R].DNAGPEVNRTFCPPSGLASVNSQEEAHFTR.[H]	1xCarbamidomethyl [C12]; 1xTMTpro [N-Term]	0.00178944	0.000117823	1	1	1	1	B1ART2	B1ART2 [1444-1473]	B1ART2 1xCarbamidomethyl [C1455]	Vacuolar protein sorting 13D OS=Mus musculus OX=10090 GN=Vps13d PE=1 SV=2	1	3591.72	1.801	1.064	0.945	1.031	0.877	2.4	0.12883	0.853439	0.835899	0.779857	0.939561	0.147018	0.827371	0.999952	0.999996	1	0.99999	0.919374	326	192.6	171	186.6	158.7	181	434.5	10.91	5.25	15.29	15.06	9.31		6.39	99.4	214	164.6
High	[R].TFCPPSGLASVNSQEEAHFTR.[H]	1xCarbamidomethyl [C3]; 1xTMTpro [N-Term]	3.74248e-07	2.82963e-05	1	1	1	1	B1ART2	B1ART2 [1453-1473]	B1ART2 1xCarbamidomethyl [C1455]	Vacuolar protein sorting 13D OS=Mus musculus OX=10090 GN=Vps13d PE=1 SV=2	0	2639.28	0.963	0.773	1.14	1.662	1.341	2.035	0.706635	0.807903	0.558924	0.351215	0.453022	0.148707	0.999058	0.999952	0.999526	0.963118	0.99991	0.921916	223.1	179.2	264.2	385.2	310.7	231.7	471.6	7.48	3.17	12.65	3.72	0.15		2.79	77.5	128.6	155.4
High	[K].EYLSQSCPSVSSVEYPDMPR.[S]	1xCarbamidomethyl [C7]; 1xTMTpro [N-Term]	0.00227428	0.000117823	1	1	1	1	B1ART2	B1ART2 [1705-1724]	B1ART2 1xCarbamidomethyl [C1711]	Vacuolar protein sorting 13D OS=Mus musculus OX=10090 GN=Vps13d PE=1 SV=2	0	2635.23	0.974	2.406	1.476	1.207	1.496	1.704	0.680514	0.151553	0.282934	0.657716	0.346383	0.300365	0.997641	0.908525	0.965487	1	0.987609	0.994122	187.3	462.6	283.8	232.1	287.5	192.2	327.5	6.07	1.1	7.35	3.75	7.01		2.87	59.1	118.8	407.2
High	[R].QTGGSLLTEPCR.[L]	1xCarbamidomethyl [C11]; 1xTMTpro [N-Term]	0.000519609	2.82963e-05	1	1	1	1	B1ART2	B1ART2 [2196-2207]	B1ART2 1xCarbamidomethyl [C2206]	Vacuolar protein sorting 13D OS=Mus musculus OX=10090 GN=Vps13d PE=1 SV=2	0	1622.85	0.786	0.995	1.254	1.698	1.143	0.462	0.966348	0.85216	0.488806	0.390569	0.771462	0.730619	0.999984	0.999952	0.999091	0.980362	0.99991	0.995093	595.8	754.2	950.4	1287.4	866.3	758.1	350.6	3.17	10.3	13.76	16.44	4.13		6.43	200.7	354	622
High	[R].QTGGSLLTEPCRLK.[L]	1xCarbamidomethyl [C11]; 1xTMTpro [K14]; 1xTMTpro [N-Term]	0.000504115	2.82963e-05	1	1	1	1	B1ART2	B1ART2 [2196-2209]	B1ART2 1xCarbamidomethyl [C2206]	Vacuolar protein sorting 13D OS=Mus musculus OX=10090 GN=Vps13d PE=1 SV=2	1	2168.24	0.887	0.798	1.071	1.115	0.941	0.625	0.72753	0.999333	0.585289	0.775205	0.939665	0.973788	0.999984	0.999952	0.999526	1	0.99999	0.999948	597.6	537.5	721.6	751.2	633.9	673.5	421.1	4.91	2.34	6.45	9.65	12.28		2.19	203.8	350.7	484.8
High	[K].SIPEQASAAAPDSSALEVDSISCSLPGASR.[I]	1xCarbamidomethyl [C23]; 1xTMTpro [N-Term]	3.77102e-07	2.82963e-05	1	1	1	1	B1ART2	B1ART2 [2592-2621]	B1ART2 1xCarbamidomethyl [C2614]	Vacuolar protein sorting 13D OS=Mus musculus OX=10090 GN=Vps13d PE=1 SV=2	0	3277.62	1.149	1.088	1.22	1.262	1.122	3.368	0.465136	0.893862	0.441498	0.492819	0.613611	0.0450508	0.996109	0.999952	0.999091	1	0.99991	0.688299	100.8	95.4	107	110.7	98.4	87.7	295.4	17.48	2.73	2.81	3.65	11.93		3.62	37.6	54.1	83
High	[R].LQELGFSMDDCRK.[A]	1xCarbamidomethyl [C11]; 1xTMTpro [K13]; 1xTMTpro [N-Term]	0.015703	0.001019	1	1	1	1	B1ART2	B1ART2 [2645-2657]	B1ART2 1xCarbamidomethyl [C2655]	Vacuolar protein sorting 13D OS=Mus musculus OX=10090 GN=Vps13d PE=1 SV=2	1	2207.14	0.853	0.795	0.942	0.963	0.942	0.672	0.800899	0.991581	0.692857	0.94852	0.942448	0.986555	0.999984	0.999952	0.999996	1	0.99999	0.999948	571.9	533.1	631.9	645.8	631.8	670.5	450.4	8.8	1.19	1.34	8.19	2.46		15.13	200.5	326.5	468.9
High	[R].IECDIQLETIPLK.[L]	1xCarbamidomethyl [C3]; 1xTMTpro [K13]; 1xTMTpro [N-Term]	0.0174783	0.00109426	1	1	1	2	B1ART2	B1ART2 [266-278]	B1ART2 1xCarbamidomethyl [C268]	Vacuolar protein sorting 13D OS=Mus musculus OX=10090 GN=Vps13d PE=1 SV=2	0	2180.25	1.112	1.161	1.283	1.536	1.341	2.309	0.558791	0.579881	0.377247	0.400046	0.578453	0.111737	0.996109	0.999952	0.991802	0.985175	0.99991	0.874676	741.2	773.6	854.8	1023.7	893.5	666.5	1539.1	6.19	4.28	7.57	6.1	5.32		2.42	255.1	431.1	665.8
High	[K].GMGVFFCK.[V]	1xCarbamidomethyl [C7]; 1xTMTpro [K8]; 1xTMTpro [N-Term]	0.145792	0.0083958	1	1	1	1	B1ART2	B1ART2 [3105-3112]	B1ART2 1xCarbamidomethyl [C3111]	Vacuolar protein sorting 13D OS=Mus musculus OX=10090 GN=Vps13d PE=1 SV=2	0	1553.85	1.281	0.564	0.886	0.718	0.801	1.289	0.699564	0.610959	0.941608	0.52053	0.608069	0.529111	0.999058	0.999952	0.999996	1	0.99991	0.994122	1886.9	831.1	1304.8	1058.3	1179.7	1473.1	1899.6	11.33	7.48	2.01	10.04	3.5		5.97	573.6	1242.4	777.3
High	[K].RECHSMDTEK.[S]	1xCarbamidomethyl [C3]; 1xTMTpro [K10]; 1xTMTpro [N-Term]	0.0869271	0.00588444	1	1	1	1	B1ART2	B1ART2 [3131-3140]	B1ART2 1xCarbamidomethyl [C3133]	Vacuolar protein sorting 13D OS=Mus musculus OX=10090 GN=Vps13d PE=1 SV=2	1	1900.95	0.97	0.998	0.798	1.004	1.06	2.437	0.657266	0.995745	0.924638	0.773324	0.664509	0.140954	0.996109	0.999952	0.999996	1	0.99991	0.91388	88.4	91	72.8	91.5	96.7	91.2	222.2	11.03	2.19	2.49	11.59	13.39		7.23	31.5	49.7	79.5
High	[K].EAALPTADTSQNIELGVSLENFPLCK.[E]	1xCarbamidomethyl [C25]; 1xTMTpro [K26]; 1xTMTpro [N-Term]	0.000178468	2.82963e-05	1	1	1	2	B1ART2	B1ART2 [3213-3238]	B1ART2 1xCarbamidomethyl [C3237]	Vacuolar protein sorting 13D OS=Mus musculus OX=10090 GN=Vps13d PE=1 SV=2	0	3425.81	1.445	1.036	1.16	0.884	1.233	2.321	0.26521	0.780037	0.458224	0.993667	0.484585	0.0845531	0.965783	0.999952	0.999091	1	0.99991	0.824839	569.5	408	457.1	348.5	485.9	394	914.4	17.67	3.74	0.78	0.39	5.66		2.6	212.7	305.2	352.5
High	[R].GIHPEGMPGWCQGFSLDGGSGVR.[A]	1xCarbamidomethyl [C11]; 1xTMTpro [N-Term]	2.37055e-06	2.82963e-05	1	1	1	1	B1ART2	B1ART2 [3342-3364]	B1ART2 1xCarbamidomethyl [C3352]	Vacuolar protein sorting 13D OS=Mus musculus OX=10090 GN=Vps13d PE=1 SV=2	0	2705.29	1.145	1.222	1.377	1.757	1.026	0.679	0.472311	0.641814	0.260908	0.288686	0.721729	0.990894	0.996109	0.999952	0.954754	0.929766	0.99991	0.999948	372.4	397.7	447.8	571.5	333.6	325.3	221	0.13	10.78	12.28	32.87	17.48		14.65	122.8	226.1	326.8
High	[R].NDYDQLLCVR.[L]	1xCarbamidomethyl [C8]; 1xTMTpro [N-Term]	0.0144089	0.000889533	1	1	1	1	B1ART2	B1ART2 [3449-3458]	B1ART2 1xCarbamidomethyl [C3456]	Vacuolar protein sorting 13D OS=Mus musculus OX=10090 GN=Vps13d PE=1 SV=2	0	1599.81	1.239	0.987	1.046	1.052	0.951	0.794	0.381152	0.800025	0.605525	0.700554	0.739765	0.767737	0.996089	0.999952	0.999526	1	0.99991	0.996886	426.5	339.8	360.1	361.9	327.5	344.2	273.4	11.3	6.52	6.5	2.21	12.53		2.71	152.2	239.2	287.8
High	[K].LTCGLHGLVVQAK.[G]	1xCarbamidomethyl [C3]; 1xTMTpro [K13]; 1xTMTpro [N-Term]	0.00209452	0.000117823	1	1	1	1	B1ART2	B1ART2 [3721-3733]	B1ART2 1xCarbamidomethyl [C3723]	Vacuolar protein sorting 13D OS=Mus musculus OX=10090 GN=Vps13d PE=1 SV=2	0	2004.19	1.116	0.713	0.878	1.215	0.98	1.703	0.751673	0.798214	0.969897	0.833671	0.849994	0.352367	0.999984	0.999952	0.999996	1	0.99991	0.994122	1495.8	955	1176.2	1628	1314	1340.3	2282.2	2.13	2.65	1.95	4.75	1.95		8.85	485.4	922.7	863.2
High	[R].ALQITDFCQR.[K]	1xCarbamidomethyl [C8]; 1xTMTpro [N-Term]	0.0176033	0.00111911	1	1	1	1	B1ART2	B1ART2 [3789-3798]	B1ART2 1xCarbamidomethyl [C3796]	Vacuolar protein sorting 13D OS=Mus musculus OX=10090 GN=Vps13d PE=1 SV=2	0	1555.82	0.894	1.543	1.322	1.749	1.338	0.78	0.711536	0.473901	0.334854	0.329215	0.616062	0.819678	0.999058	0.999596	0.984191	0.950198	0.99991	0.997925	597	1031.2	883.4	1168.6	894.1	668.1	521.2	1.95	2.66	16.16	27.6	3.6		4.5	199.4	357.8	897.7
High	[R].APQMTVNSLQCHR.[H]	1xCarbamidomethyl [C11]; 1xTMTpro [N-Term]	2.21756e-08	2.82963e-05	1	1	1	1	B1AS29	B1AS29 [340-352]	B1AS29 1xCarbamidomethyl [C350]	Glutamate receptor ionotropic, kainate 3 OS=Mus musculus OX=10090 GN=Grik3 PE=1 SV=1	0	1845.94	0.424	4.158	0.699	0.604	0.528	0.84	0.293668	0.0178487	0.744172	0.549475	0.465038	0.695276	0.974317	0.604483	0.999996	1	0.99991	0.995093	31	304.1	51.2	44.2	38.6	73.2	61.4	21.32	2.48	13.4	5.37	9.18		26.15	11.9	16.2	265.1
High	[R].SFCSTVADEIR.[F]	1xCarbamidomethyl [C3]; 1xTMTpro [N-Term]	1.4455e-05	2.82963e-05	1	1	1	1	B1AS29	B1AS29 [857-867]	B1AS29 1xCarbamidomethyl [C859]	Glutamate receptor ionotropic, kainate 3 OS=Mus musculus OX=10090 GN=Grik3 PE=1 SV=1	0	1588.8	0.336	3.744	0.632	0.362	0.314	0.618	0.128298	0.0857513	0.718441	0.0725938	0.0465558	0.936592	0.826089	0.834473	0.999996	0.560233	0.544627	0.9999	120.1	1339.1	226.1	129.5	112.4	357.6	220.9	1.53	5.19	6.11	15.11	7.92		7.69	40	72.2	1145.1
High	[R].FSLTCQR.[R]	1xCarbamidomethyl [C5]; 1xTMTpro [N-Term]	0.00200246	0.000117823	1	1	1	1	B1AS29	B1AS29 [868-874]	B1AS29 1xCarbamidomethyl [C872]	Glutamate receptor ionotropic, kainate 3 OS=Mus musculus OX=10090 GN=Grik3 PE=1 SV=1	0	1215.65	0.277	3.455	0.463	0.325	0.253	0.304	0.115238	0.151118	0.513286	0.0983204	0.0850024	0.38376	0.801429	0.908093	0.999526	0.641998	0.692135	0.994122	172.3	2148.3	287.6	202	157.2	621.7	188.8	3.19	11.94	12.14	10.79	3.47		3.28	55.5	107.1	1751
High	[R].QGFACLHR.[L]	1xCarbamidomethyl [C5]; 1xTMTpro [N-Term]	6.75457e-05	2.82963e-05	1	1	1	1	B1AUE5	B1AUE5 [167-174]	B1AUE5 1xCarbamidomethyl [C171]	Peroxisome biogenesis factor 10 OS=Mus musculus OX=10090 GN=Pex10 PE=2 SV=1	0	1292.69	0.66	0.569	1.093	1.651	1.211	0.596	0.830647	0.437469	0.605012	0.307618	0.540709	0.808616	0.999984	0.999596	0.999526	0.940754	0.99991	0.997925	136.7	118	226.5	342.2	250.9	207.3	123.6	12.55	4.04	4.57	39.33	17.49		18.86	41.2	90.8	101.7
High	[R].SSLEDRAVCR.[T]	1xCarbamidomethyl [C9]; 1xTMTpro [N-Term]	0.162778	0.00900302	1	1	1	1	B1AUE5	B1AUE5 [258-267]	B1AUE5 1xCarbamidomethyl [C266]	Peroxisome biogenesis factor 10 OS=Mus musculus OX=10090 GN=Pex10 PE=2 SV=1	1	1496.78	0.781	1.077	1.374	1.738	0.781	0.511	0.90791	0.651028	0.367657	0.278564	0.909382	0.644299	0.999984	0.999952	0.989327	0.922617	0.999916	0.995093	235.4	324.7	414.3	523.9	235.4	301.4	154.1	7.75	14	1.95	12.81	2.07		10.5	73.4	151.1	318.1
High	[R].TPLCTLCLEER.[R]	2xCarbamidomethyl [C4; C7]; 1xTMTpro [N-Term]	2.99705e-05	2.82963e-05	1	1	1	1	B1AUE5	B1AUE5 [268-278]	B1AUE5 2xCarbamidomethyl [C271; C274]	Peroxisome biogenesis factor 10 OS=Mus musculus OX=10090 GN=Pex10 PE=2 SV=1	0	1695.87	0.527	0.713	0.823	1.554	1.153	0.602	0.711186	0.906845	0.861979	0.381054	0.652815	0.970873	0.999058	0.999952	0.999996	0.975415	0.99991	0.999948	341.2	461.7	532.4	1005.6	746	647.3	389.9	11.67	1.46	2.4	17.81	23.86		9.26	122.1	190.9	405.3
High	[R].TPLCTLCLEERR.[H]	2xCarbamidomethyl [C4; C7]; 1xTMTpro [N-Term]	0.05051	0.00359097	1	1	1	1	B1AUE5	B1AUE5 [268-279]	B1AUE5 2xCarbamidomethyl [C271; C274]	Peroxisome biogenesis factor 10 OS=Mus musculus OX=10090 GN=Pex10 PE=2 SV=1	1	1851.97	0.923	1.443	1.295	2.015	1.164	1.884	0.714552	0.394734	0.41676	0.173776	0.596567	0.197845	0.999058	0.999596	0.999091	0.806625	0.99991	0.961531	504.3	788.4	707.4	1100.6	635.5	546.2	1028.8	25.54	9.73	14.08	24.06	1.57		16.54	199.4	255.3	652.8
High	[K].ASTPPDAGPIVIHCSAGTGR.[T]	1xCarbamidomethyl [C14]; 1xTMTpro [N-Term]	7.54661e-10	2.82963e-05	1	1	1	2	B1AUH1	B1AUH1 [1072-1091]	B1AUH1 1xCarbamidomethyl [C1085]	Receptor-type tyrosine-protein phosphatase U OS=Mus musculus OX=10090 GN=Ptpru PE=1 SV=1	0	2268.17	0.473	2.378	0.866	1.982	0.725	0.804	0.317883	0.175717	0.96479	0.214464	0.77858	0.918388	0.983166	0.92883	0.999996	0.859562	0.99991	0.998589	124.5	625.9	227.9	521.6	190.9	263.2	211.6	18.56	4.72	9.32	6.14	4.69		37.45	46.8	66.3	574.1
High	[R].TVVHCLNGGGR.[S]	1xCarbamidomethyl [C5]; 1xTMTpro [N-Term]	3.9695e-05	2.82963e-05	3	3	1	2	B1AUH1; Q99M80; P28828	B1AUH1 [1376-1386]; Q99M80 [1387-1397]; P28828 [1385-1395]	B1AUH1 1xCarbamidomethyl [C1380]; Q99M80 1xCarbamidomethyl [C1391]; P28828 1xCarbamidomethyl [C1389]	Receptor-type tyrosine-protein phosphatase U OS=Mus musculus OX=10090 GN=Ptpru PE=1 SV=1 Receptor-type tyrosine-protein phosphatase T OS=Mus musculus OX=10090 GN=Ptprt PE=1 SV=2 Receptor-type tyrosine-protein phosphatase mu OS=Mus musculus OX=10090 GN=Ptprm PE=1 SV=2	0	1473.79	0.701	1.639	1.611	0.932	0.354	0.239	0.926915	0.337132	0.193523	0.937209	0.0880906	0.13564	0.999984	0.991347	0.908826	1	0.703589	0.909669	231.8	541.9	532.4	308.2	117	330.5	79	12.44	0.34	2.63	9.63	6.71		27.54	69.9	153.8	481.8
High	[K].KDDTLTLAPYDACWNAFR.[G]	1xCarbamidomethyl [C13]; 1xTMTpro [K1]; 1xTMTpro [N-Term]	0.0235344	0.00159943	1	1	1	1	B1AUN2	B1AUN2 [269-286]	B1AUN2 1xCarbamidomethyl [C281]	Eukaryotic translation initiation factor 2B, subunit 3 OS=Mus musculus OX=10090 GN=Eif2b3 PE=1 SV=1	1	2765.42	1.366	0.899	1.159	0.783	1.484	1.669	0.259442	0.831857	0.433621	0.899992	0.350078	0.256786	0.962291	0.999952	0.999091	1	0.989183	0.994122	637.3	419.6	540.9	365.6	692.4	466.6	778.6	8.33	1.05	11.6	2.47	1.75		4.47	222.7	365.1	369.5
High	[R].CYVHIMK.[E]	1xCarbamidomethyl [C1]; 1xTMTpro [K7]; 1xTMTpro [N-Term]	0.0559667	0.004027	1	1	1	1	B1AUN2	B1AUN2 [300-306]	B1AUN2 1xCarbamidomethyl [C300]	Eukaryotic translation initiation factor 2B, subunit 3 OS=Mus musculus OX=10090 GN=Eif2b3 PE=1 SV=1	0	1558.87	0.706	0.832	0.66	0.6	1.34	0.766	0.938592	0.978053	0.85634	0.436956	0.61935	0.889806	0.999984	0.999952	0.999996	0.993732	0.99991	0.998045	664.1	782.2	621	564.2	1259.7	940.3	720.4	13.83	5.3	5.29	2.97	6.24		3.1	241.3	365.8	720.4
High	[K].HSVIGSSCVIR.[D]	1xCarbamidomethyl [C8]; 1xTMTpro [N-Term]	0.0119481	0.000763256	1	1	1	2	B1AUN2	B1AUN2 [372-382]	B1AUN2 1xCarbamidomethyl [C379]	Eukaryotic translation initiation factor 2B, subunit 3 OS=Mus musculus OX=10090 GN=Eif2b3 PE=1 SV=1	0	1518.84	0.775	0.653	0.945	1.546	1.611	0.359	0.923738	0.852733	0.679399	0.435877	0.404122	0.533583	0.999984	0.999952	0.999996	0.993215	0.99807	0.994122	469.3	395.4	572.5	936.3	975.7	605.7	217.5	16.96	1.9	20.93	6.93	2.2		0.86	174.4	252.8	355.5
High	[K].NCLVGSGQR.[I]	1xCarbamidomethyl [C2]; 1xTMTpro [N-Term]	0.00619619	0.000397541	1	1	1	1	B1AUN2	B1AUN2 [423-431]	B1AUN2 1xCarbamidomethyl [C424]	Eukaryotic translation initiation factor 2B, subunit 3 OS=Mus musculus OX=10090 GN=Eif2b3 PE=1 SV=1	0	1294.69	0.276	0.524	0.249	0.327	1.556	0.371	0.0927461	0.506244	0.0664488	0.125757	0.41244	0.54049	0.742614	0.999596	0.690861	0.713989	0.999808	0.994655	130.3	247.4	117.7	154.6	735.2	472.4	175.4	19.5	3.49	0.28	5.09	23.99		24.29	49.3	68.9	224.9
High	[K].LDIVCIPDEADMGTADSLR.[H]	1xCarbamidomethyl [C5]; 1xTMTpro [N-Term]	0.00201752	0.000117823	1	1	1	1	B1AUN2	B1AUN2 [73-91]	B1AUN2 1xCarbamidomethyl [C77]	Eukaryotic translation initiation factor 2B, subunit 3 OS=Mus musculus OX=10090 GN=Eif2b3 PE=1 SV=1	0	2395.18	1.12	0.924	0.95	1.153	2.163	1.232	0.479583	0.973656	0.82486	0.675	0.17586	0.498081	0.996109	0.999952	0.999996	1	0.886316	0.994122	276.4	227.9	234.3	284.4	533.6	246.7	304	5.43	1.16	12.41	3.97	8.06		3.63	94.6	161.6	203.8
High	[K].MKLDIVCIPDEADMGTADSLR.[H]	1xCarbamidomethyl [C7]; 1xTMTpro [K2]; 1xTMTpro [N-Term]	0.0101876	0.000632568	1	1	1	1	B1AUN2	B1AUN2 [71-91]	B1AUN2 1xCarbamidomethyl [C77]	Eukaryotic translation initiation factor 2B, subunit 3 OS=Mus musculus OX=10090 GN=Eif2b3 PE=1 SV=1	1	2958.52	1.196	0.971	2.171	0.761	1.391	0.739	0.476948	0.761749	0.147001	0.827609	0.578602	0.942572	0.996109	0.999952	0.856293	1	0.99991	0.999948	780.9	634.1	1417.8	496.6	908.3	653	482.8	40.22	3.02	31.45	1.43	19.02		31.25	192	635.7	550.6
High	[R].ACEHPAAR.[Q]	1xCarbamidomethyl [C2]; 1xTMTpro [N-Term]	0.000519609	2.82963e-05	1	1	1	1	B1AVH7	B1AVH7 [655-662]	B1AVH7 1xCarbamidomethyl [C656]	TBC1 domain family member 2A OS=Mus musculus OX=10090 GN=Tbc1d2 PE=2 SV=1	0	1215.62	1.275	1.2	1.259	2.211	0.723	1.042	0.323259	0.673382	0.447369	0.0836005	0.730939	0.536511	0.985011	0.999952	0.999091	0.596559	0.99991	0.994122	133.6	125.8	131.9	231.6	75.7	104.8	109.2	14.2	4.07	30.22	22.06	7.78		16.29	39.8	89.8	108.4
High	[K].HSQSEQVPLCPTGMSR.[L]	1xCarbamidomethyl [C10]; 1xTMTpro [N-Term]	0.00121047	5.93436e-05	1	1	1	1	B1AVK5	B1AVK5 [1473-1488]	B1AVK5 1xCarbamidomethyl [C1482]	Collagen, type IV, alpha 6 OS=Mus musculus OX=10090 GN=Col4a6 PE=1 SV=1	0	2118.04	1.423	0.969	1.194	1.849	0.892	2.967	0.283446	0.997633	0.53387	0.24557	0.981309	0.0670868	0.969286	0.999952	0.999526	0.892853	0.99999	0.780901	250.5	170.6	210.1	325.4	157	176	522.3	0.84	7.11	10.53	3.95	8.3		37.67	83	151.3	143.9
High	[K].AHNQDLGFAGSCLPR.[F]	1xCarbamidomethyl [C12]; 1xTMTpro [N-Term]	0.00145005	5.93436e-05	1	1	1	1	B1AVK5	B1AVK5 [1504-1518]	B1AVK5 1xCarbamidomethyl [C1515]	Collagen, type IV, alpha 6 OS=Mus musculus OX=10090 GN=Col4a6 PE=1 SV=1	0	1946.98	0.886	1.652	1.097	0.976	0.474	14.881	0.762702	0.317362	0.5936	0.849014	0.308798	1.82197e-05	0.999984	0.989785	0.999526	1	0.981203	0.00241233	77.4	144.3	95.8	85.2	41.4	87.4	1299.9	21.37	7.53	13.92	7.67	19.28		49.87	29.7	40.4	121.4
High	[R].ATPFIECSGAR.[G]	1xCarbamidomethyl [C7]; 1xTMTpro [N-Term]	0.0770033	0.005231	1	1	1	1	B1AVK5	B1AVK5 [1630-1640]	B1AVK5 1xCarbamidomethyl [C1636]	Collagen, type IV, alpha 6 OS=Mus musculus OX=10090 GN=Col4a6 PE=1 SV=1	0	1512.78	0.605	1.784	0.979	0.502	0.385	4.975	0.73623	0.483624	0.737772	0.294642	0.337147	0.225885	0.999984	0.999596	0.999996	0.934269	0.987609	0.9774	505.2	1488.5	816.8	418.8	321.5	834.6	4152.2	32.57	0.67	15.92	19.01	13.23		37.51	210.4	242.8	1314.2
High	[R].GTCHYFANK.[Y]	1xCarbamidomethyl [C3]; 1xTMTpro [K9]; 1xTMTpro [N-Term]	2.28005e-05	2.82963e-05	2	2	1	4	B1AVK5; P08122	B1AVK5 [1641-1649]; P08122 [1658-1666]	B1AVK5 1xCarbamidomethyl [C1643]; P08122 1xCarbamidomethyl [C1660]	Collagen, type IV, alpha 6 OS=Mus musculus OX=10090 GN=Col4a6 PE=1 SV=1 Collagen alpha-2(IV) chain OS=Mus musculus OX=10090 GN=Col4a2 PE=1 SV=4	0	1705.9	1.791	0.44	0.618	0.408	0.554	19.474	0.801822	0.446323	0.626926	0.108317	0.344852	0.547777	0.999984	0.999596	0.999526	0.670857	0.987609	0.995059	3545.7	871.5	1223	808	1096	1979.8	38555.2	32.46	4.85	1.74	13.61	10.86		16.07	1475.5	1705.5	747
High	[R].AGGDHTCRDELER.[A]	1xCarbamidomethyl [C7]; 1xTMTpro [N-Term]	0.000446607	2.82963e-05	1	1	1	1	B1AVY7	B1AVY7 [808-820]	B1AVY7 1xCarbamidomethyl [C814]	Kinesin-like protein KIF16B OS=Mus musculus OX=10090 GN=Kif16b PE=1 SV=1	1	1819.87	0.739	0.915	1.098	1.977	0.98	1.09	0.986922	0.882418	0.610366	0.113471	0.737742	0.422582	0.999984	0.999952	0.999526	0.682732	0.99991	0.994122	42	52	62.3	112.3	55.7	56.8	61.9	5.71	4.74	1.22	20.37	5.25		15.19	14.4	24.5	44.6
High	[K].FDPDATQFIEFCK.[L]	1xCarbamidomethyl [C12]; 1xTMTpro [K13]; 1xTMTpro [N-Term]	6.26803e-06	2.82963e-05	1	3	1	1	B1AWN6	B1AWN6 [1806-1818]	B1AWN6 1xCarbamidomethyl [C1817]	Sodium channel protein type 2 subunit alpha OS=Mus musculus OX=10090 GN=Scn2a PE=1 SV=1	0	2226.14	0.142	2.199	0.231	0.081	0.215	0.187	0.0134143	0.398457	0.0789887	4.85417e-05	0.0458875	0.166422	0.285663	0.999596	0.719431	0.00313429	0.539991	0.940219	106.7	1651.9	173.5	60.7	161.3	751.3	140.2	2.68	14.42	1.55	4.13	8.97		5.29	34.5	66.1	1322.8
High	[K].MHSAVDCNGVVSLVGGPSALTSPVGQLLPEGTTTETEIR.[K]	1xCarbamidomethyl [C7]; 1xTMTpro [N-Term]	3.79276e-14	2.82963e-05	1	1	1	1	B1AWN6	B1AWN6 [644-682]	B1AWN6 1xCarbamidomethyl [C650]	Sodium channel protein type 2 subunit alpha OS=Mus musculus OX=10090 GN=Scn2a PE=1 SV=1	0	4284.18	1.217	1.787	1.208	0.767	1.074	1.872	0.4135	0.333298	0.502348	0.857438	0.728886	0.26711	0.996109	0.991067	0.999299	1	0.99991	0.994122	176.6	259.3	175.3	111.3	155.9	145.1	271.6	4.4	5.61	10.45	0.18	1.91		3.62	60	104	221.1
High	[K].ISNDCELPR.[W]	1xCarbamidomethyl [C5]; 1xTMTpro [N-Term]	6.35647e-05	2.82963e-05	1	1	1	1	B1AWN6	B1AWN6 [915-923]	B1AWN6 1xCarbamidomethyl [C919]	Sodium channel protein type 2 subunit alpha OS=Mus musculus OX=10090 GN=Scn2a PE=1 SV=1	0	1407.72	0.284	3.354	0.37	0.206	0.179	0.401	0.13731	0.341337	0.302592	0.0254827	0.039298	0.504534	0.840547	0.991935	0.974254	0.314459	0.50565	0.994122	276.2	3261.9	360.3	200.3	173.9	972.7	389.6	14.64	9.36	9.38	7.92	29.98		15.54	82	186.2	2707.9
High	[R].DNPAGCTGLPSYSEHPTLR.[R]	1xCarbamidomethyl [C6]; 1xTMTpro [N-Term]	1.12692e-07	2.82963e-05	1	1	1	1	B1AXH1	B1AXH1 [445-463]	B1AXH1 1xCarbamidomethyl [C450]	NHS-like protein 2 OS=Mus musculus OX=10090 GN=Nhsl2 PE=1 SV=2	0	2376.16	1.038	2.19	1.374	1.409	1.096	1.378	0.568655	0.229142	0.375263	0.462272	0.624754	0.394885	0.996109	0.959219	0.991802	1	0.99991	0.994122	132.5	279.6	175.4	179.9	140	127.7	176	16.3	5.9	7.64	8	5.24		6.08	49	71.7	237.9
High	[K].MGGDDVMACVHDDNGR.[V]	1xCarbamidomethyl [C9]; 1xTMTpro [N-Term]	6.24127e-10	2.82963e-05	1	1	1	1	B1AXV0	B1AXV0 [154-169]	B1AXV0 1xCarbamidomethyl [C162]	DOMON domain-containing protein FRRS1L OS=Mus musculus OX=10090 GN=Frrs1l PE=1 SV=1	0	2052.89	0.636	2.406	0.846	0.504	0.497	2.602	0.786116	0.151546	0.949267	0.301765	0.358517	0.0589169	0.999984	0.908525	0.999996	0.938858	0.989621	0.758341	170.5	644.4	226.5	134.9	133.2	267.9	697.2	18.38	1.66	4.01	0.86	2.84		7.74	64	90.9	578.4
[truncated: 17,764 more rows]
[truncated: 46 more columns]

## Sheet: Table S2
Confidence	Annotated Sequence	Modifications	Qvality PEP	Qvality q-value	# Protein Groups	# Proteins	# Isoforms	# PSMs	Master Protein Accessions	Positions in Master Proteins	Modifications in Master Proteins	Master Protein Descriptions	# Missed Cleavages	Theo. MH+ [Da]	Abundance Ratio: (BAT) / (MIX)	Abundance Ratio: (Brain) / (MIX)	Abundance Ratio: (Heart) / (MIX)	Abundance Ratio: (Kidney) / (MIX)	Abundance Ratio: (Liver) / (MIX)	Abundance Ratio: (WAT) / (MIX)	Abundance Ratio P-Value: (BAT) / (MIX)	Abundance Ratio P-Value: (Brain) / (MIX)	Abundance Ratio P-Value: (Heart) / (MIX)	Abundance Ratio P-Value: (Kidney) / (MIX)	Abundance Ratio P-Value: (Liver) / (MIX)	Abundance Ratio P-Value: (WAT) / (MIX)	Abundance Ratio Adj. P-Value: (BAT) / (MIX)	Abundance Ratio Adj. P-Value: (Brain) / (MIX)	Abundance Ratio Adj. P-Value: (Heart) / (MIX)	Abundance Ratio Adj. P-Value: (Kidney) / (MIX)	Abundance Ratio Adj. P-Value: (Liver) / (MIX)	Abundance Ratio Adj. P-Value: (WAT) / (MIX)	Abundances (Grouped): BAT	Abundances (Grouped): Brain	Abundances (Grouped): Heart	Abundances (Grouped): Kidney	Abundances (Grouped): Liver	Abundances (Grouped): MIX	Abundances (Grouped): WAT	Abundances (Grouped) CV [%]: BAT	Abundances (Grouped) CV [%]: Brain	Abundances (Grouped) CV [%]: Heart	Abundances (Grouped) CV [%]: Kidney	Abundances (Grouped) CV [%]: Liver	Abundances (Grouped) CV [%]: MIX	Abundances (Grouped) CV [%]: WAT	Abundance: F1: 130C, Sample, BAT	Abundance: F1: 131N, Sample, BAT	Abundance: F1: 128C, Sample, Brain
[truncated: 16,823 more rows]
[truncated: 46 more columns]

[truncated: 1 more sheets: Table S3]
