# Supplementary material for: Enrichment of Cysteine S-palmitoylated peptides using Sodium Deoxycholate Acid Precipitation
Source: Research Square preprint supplement (doi:10.21203/rs.3.rs-4969255/v1), 2024-09-05
Supplement: Supplementary file 2 [file 7314d78d5c52a88f03a7ad30.xlsx]

## Sheet: Summary
Diabetic Mouse Brain S-Palmitoylated Proteome
	Table S1 - Diabetic Mouse Brain S-Palmitoylated proteome
	Table S2 - Diabetic Mouse Brain S-Palmitoylated proteome - No disulfide sites

## Sheet: Table S1
Master Protein Accessions	Master Protein Descriptions	Annotated Sequence	Modifications	Qvality PEP	Qvality q-value	# Protein Groups	# Proteins	# Isoforms	# PSMs	Positions in Master Proteins	Modifications in Master Proteins	# Missed Cleavages	Theo. MH+ [Da]	Abundance Ratio: (dbdb) / (WT)	Abundance Ratio P-Value: (dbdb) / (WT)	Abundance Ratio Adj. P-Value: (dbdb) / (WT)	Abundances (Grouped): dbdb	Abundances (Grouped): WT	Abundances (Grouped) CV [%]: dbdb	Abundances (Grouped) CV [%]: WT	Abundances (Normalized): F1: 130N, Sample, dbdb	Abundances (Normalized): F1: 131N, Sample, dbdb	Abundances (Normalized): F1: 132N, Sample, dbdb	Abundances (Normalized): F1: 133N, Sample, dbdb	Abundances (Normalized): F1: 126, Sample, WT	Abundances (Normalized): F1: 127N, Sample, WT	Abundances (Normalized): F1: 128N, Sample, WT	Abundances (Normalized): F1: 129N, Sample, WT	Quan Info	Found in Sample: [S5] F1: 130N, Sample, dbdb	Found in Sample: [S6] F1: 131N, Sample, dbdb	Found in Sample: [S7] F1: 132N, Sample, dbdb	Found in Sample: [S8] F1: 133N, Sample, dbdb	Found in Sample: [S1] F1: 126, Sample, WT	Found in Sample: [S2] F1: 127N, Sample, WT	Found in Sample: [S3] F1: 128N, Sample, WT	Found in Sample: [S4] F1: 129N, Sample, WT	Confidence (by Search Engine): Mascot	Confidence (by Search Engine): Sequest HT	Percolator q-Value (by Search Engine): Mascot	Percolator q-Value (by Search Engine): Sequest HT	Percolator PEP (by Search Engine): Mascot	Percolator PEP (by Search Engine): Sequest HT	Ions Score (by Search Engine): Mascot	XCorr (by Search Engine): Sequest HT	Channel Occupancy [%]
Q7TSS2	Ubiquitin-conjugating enzyme E2 Q1 OS=Mus musculus OX=10090 GN=Ube2q1 PE=1 SV=2	[R].IHCNITESYPAVPPIWSVESDDPNLAAVLER.[L]	1xCarbamidomethyl [C3]; 1xTMTpro [N-Term]	8.59418e-09	4.83621e-05	1	1	1	1	Q7TSS2 [104-134]	Q7TSS2 1xCarbamidomethyl [C106]	0	3796.92	0.79	0.0203479	0.24628	292	369.4	7.69	10.45	321.7	306.1	278.5	274.1	319.1	390.2	402.5	349.8		High	High	High	High	High	High	High	High	High	Low	2.13e-05	0.9539	2.442e-10	1	38	1.59	100
P42932	T-complex protein 1 subunit theta OS=Mus musculus OX=10090 GN=Cct8 PE=1 SV=3	[R].IGLSVSEVISGYEIACK.[K]	1xCarbamidomethyl [C16]; 1xTMTpro [K17]; 1xTMTpro [N-Term]	7.92368e-12	4.83621e-05	1	1	1	42	P42932 [121-137]	P42932 1xCarbamidomethyl [C136]	0	2433.36	0.975	0.837144	0.949646	22182.3	22743.4	10.47	1.52	22186.9	21663.1	26847.4	22177.7	23367.5	22633.2	22854.1	22631.2		High	High	High	High	High	High	High	High	High	High	2.13e-05	0.0003185	2.647e-14	0.002967	129	3.63	100
P42932	T-complex protein 1 subunit theta OS=Mus musculus OX=10090 GN=Cct8 PE=1 SV=3	[R].IGLSVSEVISGYEIACKK.[A]	1xCarbamidomethyl [C16]; 2xTMTpro [K17; K18]; 1xTMTpro [N-Term]	2.03714e-11	4.83621e-05	1	1	1	4	P42932 [121-138]	P42932 1xCarbamidomethyl [C136]	1	2865.66	0.94	0.964287	0.989779	3351.1	3564.2	17.73	4.4	3419.2	3098.2	4508.6	3284.4	3360	3530.4	3598.3	3736.6		High	High	High	High	High	High	High	High	High	High	2.13e-05	0.001607	9.044e-14	0.07989	73	2.46	100
Q9WUA3	ATP-dependent 6-phosphofructokinase, platelet type OS=Mus musculus OX=10090 GN=Pfkp PE=1 SV=1	[R].LGITNLCVIGGDGSLTGANLFR.[K]	1xCarbamidomethyl [C7]; 1xTMTpro [N-Term]	4.66276e-13	4.83621e-05	1	1	1	29	Q9WUA3 [116-137]	Q9WUA3 1xCarbamidomethyl [C122]	0	2552.38	1.033	0.413408	0.751196	16618.6	16092.4	7.87	3.27	15676.4	16816.7	18795	16422.8	17027.7	16222.7	15963.1	15848.3		High	High	High	High	High	High	High	High	High	High	2.13e-05	0.0003185	1.159e-15	0.0004042	123	2.71	100
Q9WUA3	ATP-dependent 6-phosphofructokinase, platelet type OS=Mus musculus OX=10090 GN=Pfkp PE=1 SV=1	[R].LGITNLCVIGGDGSLTGANLFRK.[E]	1xCarbamidomethyl [C7]; 1xTMTpro [K23]; 1xTMTpro [N-Term]	1.43454e-12	4.83621e-05	1	1	1	5	Q9WUA3 [116-138]	Q9WUA3 1xCarbamidomethyl [C122]	1	2984.68	0.917	0.195163	0.565818	2608.4	2843.8	6.35	6.75	2671.8	2546.6	2904.4	2543.4	3090.4	2628.8	2891.4	2797		High	High	High	High	High	High	High	High	High	n/a	2.13e-05		2.822e-15		61		100
Q9QYJ0	DnaJ homolog subfamily A member 2 OS=Mus musculus OX=10090 GN=Dnaja2 PE=1 SV=1	[K].IGLVEALCGFQFTFK.[H]	1xCarbamidomethyl [C8]; 1xTMTpro [K15]; 1xTMTpro [N-Term]	7.20064e-07	4.83621e-05	1	1	1	2	Q9QYJ0 [273-287]	Q9QYJ0 1xCarbamidomethyl [C280]	0	2338.31	0.835	0.00125389	0.107568	1138.4	1363.6	4.75	4	1127.9	1167	1046.2	1149	1394.2	1381	1346.4	1273.8		High	High	High	High	High	High	High	High	High	High	2.13e-05	0.0003185	7.969e-08	0.01184	65	2.38	100
Q9CZ42	ATP-dependent (S)-NAD(P)H-hydrate dehydratase OS=Mus musculus OX=10090 GN=Naxd PE=1 SV=1	[R].IGIVGGCQEYTGAPYFAGISALK.[V]	1xCarbamidomethyl [C7]; 1xTMTpro [K23]; 1xTMTpro [N-Term]	7.80541e-11	4.83621e-05	1	1	1	2	Q9CZ42 [72-94]	Q9CZ42 1xCarbamidomethyl [C78]	0	2980.61	0.832	0.18722	0.556748	1307.6	1571.8	6.96	12.93	1461.2	1306.9	1308.3	1243.5	1222.2	1565.2	1578.4	1662.8		High	High	High	High	High	High	High	High	High	n/a	2.13e-05		5.261e-13		102		100
Q9JLC8	Sacsin OS=Mus musculus OX=10090 GN=Sacs PE=1 SV=2	[R].LGLVPCGAVGVLLHETQEQK.[W]	1xCarbamidomethyl [C6]; 1xTMTpro [K20]; 1xTMTpro [N-Term]	3.29864e-09	4.83621e-05	1	1	1	3	Q9JLC8 [1843-1862]	Q9JLC8 1xCarbamidomethyl [C1848]	0	2756.56	0.939	0.105077	0.442368	1459	1553.6	3.4	11.08	1491.8	1436.1	1384.2	1482.2	1909.9	1535.9	1564.1	1543.1		High	High	High	High	High	High	High	High	High	n/a	2.13e-05		6.986e-11		52		100
O54991	Contactin-associated protein 1 OS=Mus musculus OX=10090 GN=Cntnap1 PE=1 SV=2	[R].LGIYGCPYTSSILYFDGDDAISYR.[F]	1xCarbamidomethyl [C6]; 1xTMTpro [N-Term]	2.54064e-08	4.83621e-05	1	1	1	1	O54991 [164-187]	O54991 1xCarbamidomethyl [C169]	0	3050.48	1.031	0.492842	0.797902	186.7	181.1	12.43	4.33	181.5	225.2	169.7	192.1	192	174	184.5	177.9		High	High	High	High	High	High	High	High	High	n/a	2.13e-05		1.005e-09		51		100
Q99JX7	Nuclear RNA export factor 1 OS=Mus musculus OX=10090 GN=Nxf1 PE=1 SV=3	[R].TFIAVPASNSGLCIVNDELFVR.[N]	1xCarbamidomethyl [C13]; 1xTMTpro [N-Term]	1.7946e-07	4.83621e-05	1	1	1	1	Q99JX7 [515-536]	Q99JX7 1xCarbamidomethyl [C527]	0	2726.45	1.028	0.669342	0.884815	580.9	565.1	9.87	10.76	545.8	662.8	542.8	618.2	651.7	592.7	538.6	512.3		High	High	High	High	High	High	High	High	High	n/a	2.13e-05		1.3e-08		54		100
Q62018	RNA polymerase-associated protein CTR9 homolog OS=Mus musculus OX=10090 GN=Ctr9 PE=1 SV=2	[R].LGMGHCFVK.[L]	1xCarbamidomethyl [C6]; 1xTMTpro [K9]; 1xTMTpro [N-Term]	1.21772e-05	4.83621e-05	1	1	1	1	Q62018 [202-210]	Q62018 1xCarbamidomethyl [C207]	0	1656.92	1.029	0.723376	0.90723	738.5	718	5.6	5.01	746	731	692.2	792.5	702.3	781.8	706.3	729.8		High	High	High	High	High	High	High	High	High	n/a	2.13e-05		3.269e-06		36		100
Q920I9	WD repeat-containing protein 7 OS=Mus musculus OX=10090 GN=Wdr7 PE=1 SV=3	[R].LGMLKPHCTVSFGLLSR.[G]	1xCarbamidomethyl [C8]; 1xTMTpro [K5]; 1xTMTpro [N-Term]	1.16957e-06	4.83621e-05	1	1	1	1	Q920I9 [824-840]	Q920I9 1xCarbamidomethyl [C831]	1	2524.44	0.997	0.499364	0.80066	295.4	296.3	12.81	6.91	302.6	304.5	228	288.3	299.9	270.3	319.8	292.7		High	High	High	High	High	High	High	High	High	n/a	2.13e-05		1.503e-07		44		100
P19096	Fatty acid synthase OS=Mus musculus OX=10090 GN=Fasn PE=1 SV=2	[K].LGMLSPDGTCR.[S]	1xCarbamidomethyl [C10]; 1xTMTpro [N-Term]	8.584e-05	4.83621e-05	1	1	1	1	P19096 [203-213]	P19096 1xCarbamidomethyl [C212]	0	1510.77	0.876	0.00184576	0.117135	848.5	968.3	3.34	3.48	861.4	892	829.3	835.7	934.5	983.4	953.3	1011.4		High	High	High	High	High	High	High	High	High	n/a	2.13e-05		4.73e-05		31		100
Q91VI7	Ribonuclease inhibitor OS=Mus musculus OX=10090 GN=Rnh1 PE=1 SV=1	[K].LGNAGIAALCPGLLLPSCK.[L]	2xCarbamidomethyl [C10; C18]; 1xTMTpro [K19]; 1xTMTpro [N-Term]	1.52254e-08	4.83621e-05	1	1	1	6	Q91VI7 [234-252]	Q91VI7 2xCarbamidomethyl [C243; C251]	0	2533.45	0.95	0.60008	0.854075	2545.4	2680.4	11.19	5.58	2717.3	2384.4	2981.5	2372.9	2542.3	2745	2617.3	2885		High	High	High	High	High	High	High	High	High	n/a	2.13e-05		5.179e-10		81		100
Q80T79	CUB and sushi domain-containing protein 3 OS=Mus musculus OX=10090 GN=Csmd3 PE=1 SV=3	[R].IGNDFAVGSLVLFECNPGYILHGSR.[A]	1xCarbamidomethyl [C15]; 1xTMTpro [N-Term]	6.14368e-11	4.83621e-05	1	1	1	1	Q80T79 [1890-1914]	Q80T79 1xCarbamidomethyl [C1904]	0	3039.57	1.05	0.223909	0.59389	359.8	342.8	4.85	3.6	332.9	366.4	371.7	353.4	349.3	326.5	353.4	336.4		High	High	High	High	High	High	High	High	High	n/a	2.13e-05		3.824e-13		69		100
Q8R5H1	Ubiquitin carboxyl-terminal hydrolase 15 OS=Mus musculus OX=10090 GN=Usp15 PE=1 SV=1	[K].IGNILDLCTALSALSGVPADK.[M]	1xCarbamidomethyl [C8]; 1xTMTpro [K21]; 1xTMTpro [N-Term]	4.41983e-09	4.83621e-05	1	1	1	3	Q8R5H1 [499-519]	Q8R5H1 1xCarbamidomethyl [C506]	0	2736.55	0.845	0.390574	0.734153	1732.6	2051.4	12.74	12.49	1729.5	1661	2168.5	1735.8	1640.5	1957.6	2177.5	2149.8		High	High	High	High	High	High	High	High	High	n/a	2.13e-05		1.03e-10		60		100
Q8JZW5	SH2 domain-containing protein 5 OS=Mus musculus OX=10090 GN=Sh2d5 PE=1 SV=3	[R].LGNPYCSPTLVR.[K]	1xCarbamidomethyl [C6]; 1xTMTpro [N-Term]	2.71282e-05	4.83621e-05	1	1	1	3	Q8JZW5 [231-242]	Q8JZW5 1xCarbamidomethyl [C236]	0	1680.91	0.976	0.465303	0.781424	2460.6	2521.2	17.41	8.87	2453.8	2606.7	1716.6	2467.5	2688.2	2392.9	2656.5	2225.6		High	High	High	High	High	High	High	High	High	Low	2.13e-05	0.8642	9.519e-06	1	55	1.75	100
P02468	Laminin subunit gamma-1 OS=Mus musculus OX=10090 GN=Lamc1 PE=1 SV=2	[R].LGNTEACSPCHCSPVGSLSTQCDSYGR.[C]	4xCarbamidomethyl [C7; C10; C12; C22]; 1xTMTpro [N-Term]	5.57011e-12	4.83621e-05	1	1	1	2	P02468 [387-413]	P02468 4xCarbamidomethyl [C393; C396; C398; C408]	0	3304.44	1.165	0.219852	0.590149	3024.9	2596.9	10.39	8.57	2465.6	2988.4	3061.9	3128.3	2952.4	2647.2	2547.5	2421.7		High	High	High	High	High	High	High	High	High	n/a	2.13e-05		1.661e-14		105		100
Q9D753	Exosome complex component RRP43 OS=Mus musculus OX=10090 GN=Exosc8 PE=1 SV=1	[K].LGNTTVICGVK.[A]	1xCarbamidomethyl [C8]; 1xTMTpro [K11]; 1xTMTpro [N-Term]	3.98524e-07	4.83621e-05	1	1	1	2	Q9D753 [53-63]	Q9D753 1xCarbamidomethyl [C60]	0	1770.04	1.048	0.502365	0.80211	1569.1	1496.8	17.92	20.65	1546.7	1526.7	2164.7	1591.9	2010.5	1540.5	1246.6	1454.3		High	High	High	High	High	High	High	High	High	n/a	2.13e-05		3.692e-08		53		100
P24549	Aldehyde dehydrogenase 1A1 OS=Mus musculus OX=10090 GN=Aldh1a1 PE=1 SV=5	[K].IGPALSCGNTVVVK.[P]	1xCarbamidomethyl [C7]; 1xTMTpro [K14]; 1xTMTpro [N-Term]	2.99436e-07	4.83621e-05	1	2	1	4	P24549 [180-193]	P24549 1xCarbamidomethyl [C186]	0	2023.19	0.916	0.760066	0.922046	1852.5	2022.9	25.25	14.39	1857.4	1684.4	2820.8	1847.5	2131.9	2150.9	1550.5	1919.6		High	High	High	High	High	High	High	High	High	n/a	2.13e-05		2.531e-08		74		100
Q9D8S3	ADP-ribosylation factor GTPase-activating protein 3 OS=Mus musculus OX=10090 GN=Arfgap3 PE=1 SV=2	[R].LGMGFGSCR.[S]	1xCarbamidomethyl [C8]; 1xTMTpro [N-Term]	2.16328e-05	4.83621e-05	1	1	1	1	Q9D8S3 [305-313]	Q9D8S3 1xCarbamidomethyl [C312]	0	1288.65	1.119	0.137308	0.494156	371.2	331.8	8.6	3.42	351.7	393.2	329	391.8	326.5	326	350.4	337.3		High	High	High	High	High	High	High	High	High	Low	2.13e-05	0.9689	7.04e-06	1	25	1.1	100
P24549	Aldehyde dehydrogenase 1A1 OS=Mus musculus OX=10090 GN=Aldh1a1 PE=1 SV=5	[K].IGPALSCGNTVVVKPAEQTPLTALHLASLIK.[E]	1xCarbamidomethyl [C7]; 2xTMTpro [K14; K31]; 1xTMTpro [N-Term]	2.84675e-06	4.83621e-05	1	1	1	1	P24549 [180-210]	P24549 1xCarbamidomethyl [C186]	1	4111.41	0.952	0.88953	0.970025	336.3	353.3	21.37	6.76	328	292.5	468.7	344.8	340.8	366.9	317.7	366.2		High	High	High	High	High	High	High	High	High	n/a	2.13e-05		4.803e-07		27		100
Q8BP74	L-seryl-tRNA(Sec) kinase OS=Mus musculus OX=10090 GN=Pstk PE=1 SV=2	[K].LGLCVLCGLPAAGK.[S]	2xCarbamidomethyl [C4; C7]; 1xTMTpro [K14]; 1xTMTpro [N-Term]	5.83151e-05	4.83621e-05	1	1	1	1	Q8BP74 [18-31]	Q8BP74 2xCarbamidomethyl [C21; C24]	0	2037.18	1.159	0.0236298	0.257544	549.9	474.7	6.43	4.99	500.9	585.7	544	555.8	515.3	462.1	482.7	466.8		High	High	High	High	High	High	High	High	n/a	High		0.0003185		0.001329		3.31	100
Q9JHW4	Selenocysteine-specific elongation factor OS=Mus musculus OX=10090 GN=Eefsec PE=1 SV=2	[R].LGICVTQFDPK.[L]	1xCarbamidomethyl [C4]; 1xTMTpro [K11]; 1xTMTpro [N-Term]	4.96644e-06	4.83621e-05	1	1	1	3	Q9JHW4 [272-282]	Q9JHW4 1xCarbamidomethyl [C275]	0	1886.07	1.036	0.0567024	0.353049	2231.5	2153.4	0.99	2.58	2263.7	2230.5	2210.4	2232.5	2217.3	2088.7	2175.6	2131.4		High	High	High	High	High	High	High	High	High	n/a	2.13e-05		9.973e-07		31		100
Q64737	Trifunctional purine biosynthetic protein adenosine-3 OS=Mus musculus OX=10090 GN=Gart PE=1 SV=3	[R].TFNCGIGAALVVSK.[D]	1xCarbamidomethyl [C4]; 1xTMTpro [K14]; 1xTMTpro [N-Term]	4.92458e-10	4.83621e-05	1	1	1	3	Q64737 [730-743]	Q64737 1xCarbamidomethyl [C733]	0	2045.17	1.011	0.496125	0.799665	2082.9	2060.5	4.84	5.53	2055.9	2110.2	2232.6	1993.5	1891.3	2039.9	2081.3	2160.5		High	High	High	High	High	High	High	High	High	n/a	2.13e-05		5.84e-12		91		100
Q8BH69	Selenide, water dikinase 1 OS=Mus musculus OX=10090 GN=Sephs1 PE=1 SV=1	[R].LGIGMDTCVIPLR.[H]	1xCarbamidomethyl [C8]; 1xTMTpro [N-Term]	3.56638e-08	4.83621e-05	1	1	1	3	Q8BH69 [64-76]	Q8BH69 1xCarbamidomethyl [C71]	0	1748.97	0.982	0.572574	0.841278	2600.8	2649.4	17.18	9.11	2456.1	2683.9	3491.9	2520.2	2676.6	2871.5	2297.3	2622.5		High	High	High	High	High	High	High	High	High	Low	2.13e-05	0.9597	1.578e-09	1	66	2.06	100
P11214	Tissue-type plasminogen activator OS=Mus musculus OX=10090 GN=Plat PE=1 SV=3	[K].LGLGNHNYCR.[N]	1xCarbamidomethyl [C9]; 1xTMTpro [N-Term]	5.11946e-05	4.83621e-05	1	1	1	1	P11214 [168-177]	P11214 1xCarbamidomethyl [C176]	0	1507.78	1.132	0.0228191	0.254399	346.8	306.4	5.29	4.02	364.9	348.2	320.6	345.4	328.1	301.3	311	301.9		High	High	High	High	High	High	High	High	High	n/a	2.13e-05		2.262e-05		22		100
Q69Z98	Serine/threonine-protein kinase BRSK2 OS=Mus musculus OX=10090 GN=Brsk2 PE=1 SV=2	[K].LGIHCVTCQK.[V]	2xCarbamidomethyl [C5; C8]; 1xTMTpro [K10]; 1xTMTpro [N-Term]	1.95028e-06	4.83621e-05	1	1	1	1	Q69Z98 [36-45]	Q69Z98 2xCarbamidomethyl [C40; C43]	0	1824.01	0.886	0.0209927	0.248672	569.4	642.8	5.78	5.2	553	530.7	586.3	603.9	608	668.4	618.1	672.3		High	High	High	High	High	High	High	High	High	Low	2.13e-05	0.2168	2.934e-07	0.6855	55	2.06	100
P18293	Atrial natriuretic peptide receptor 1 OS=Mus musculus OX=10090 GN=Npr1 PE=1 SV=2	[R].IGIHTGPVCAGVVGLK.[M]	1xCarbamidomethyl [C9]; 1xTMTpro [K16]; 1xTMTpro [N-Term]	1.02341e-09	4.83621e-05	1	1	1	1	P18293 [969-984]	P18293 1xCarbamidomethyl [C977]	0	2186.3	1.358	0.175394	0.540929	725.5	534.2	3.95	25.08	734.7	683.9	750.2	716.5	555.6	826.2	513.6	512		High	High	High	High	High	High	High	High	High	n/a	2.13e-05		1.52e-11		62		100
Q8BL74	General transcription factor 3C polypeptide 2 OS=Mus musculus OX=10090 GN=Gtf3c2 PE=2 SV=2	[R].LGLLALACSDGK.[V]	1xCarbamidomethyl [C8]; 1xTMTpro [K12]; 1xTMTpro [N-Term]	2.748e-05	4.83621e-05	1	1	1	1	Q8BL74 [492-503]	Q8BL74 1xCarbamidomethyl [C499]	0	1826.07	1.06	0.170895	0.534459	391	368.9	5.54	7.26	368.6	397.1	420.3	385	366.9	394.5	330.3	370.8		High	High	High	High	High	High	High	High	High	n/a	2.13e-05		9.675e-06		46		100
Q9WVD4	H(+)/Cl(-) exchange transporter 5 OS=Mus musculus OX=10090 GN=Clcn5 PE=1 SV=2	[K].LGLRQCLVTHNGR.[L]	1xCarbamidomethyl [C6]; 1xTMTpro [N-Term]	1.70033e-05	4.83621e-05	1	1	1	2	Q9WVD4 [776-788]	Q9WVD4 1xCarbamidomethyl [C781]	1	1828.03	1.047	0.847245	0.952374	298.1	284.7	11.08	4.73	283.4	325.3	252.7	313.5	307.8	289.9	278.3	279.5		High	High	High	High	High	High	High	High	High	n/a	2.13e-05		5.071e-06		43		100
Q99104	Unconventional myosin-Va OS=Mus musculus OX=10090 GN=Myo5a PE=1 SV=2	[K].LGILDLLDEECKMPK.[G]	1xCarbamidomethyl [C11]; 2xTMTpro [K12; K15]; 1xTMTpro [N-Term]	2.73345e-08	4.83621e-05	1	1	1	2	Q99104 [503-517]	Q99104 1xCarbamidomethyl [C513]	1	2686.53	0.869	0.441902	0.767121	2772.8	3190.3	20.75	22.87	3144.6	2143.7	3366.6	2444.8	2410.7	2692.2	3803.7	3780.6		High	High	High	High	High	High	High	High	High	n/a	2.13e-05		1.106e-09		26		100
P51660	Peroxisomal multifunctional enzyme type 2 OS=Mus musculus OX=10090 GN=Hsd17b4 PE=1 SV=3	[K].LGILGLCNTLAIEGR.[K]	1xCarbamidomethyl [C7]; 1xTMTpro [N-Term]	4.48681e-10	4.83621e-05	1	1	1	5	P51660 [169-183]	P51660 1xCarbamidomethyl [C175]	0	1904.1	1.116	0.112161	0.454297	3388.8	3035.5	6.33	7.63	3211.2	3618.7	3225.8	3560.1	3434.1	3133.1	2941	2923.7		High	High	High	High	High	High	High	High	High	n/a	2.13e-05		5.171e-12		84		100
P80315	T-complex protein 1 subunit delta OS=Mus musculus OX=10090 GN=Cct4 PE=1 SV=3	[K].IGLIQFCLSAPK.[T]	1xCarbamidomethyl [C7]; 1xTMTpro [K12]; 1xTMTpro [N-Term]	2.16182e-07	4.83621e-05	1	1	1	5	P80315 [246-257]	P80315 1xCarbamidomethyl [C252]	0	1955.16	0.912	0.593843	0.851347	3461.3	3794.4	18.29	4.55	3595.7	3106.4	4624.4	3331.9	3648.4	4044.2	3725	3865.1		High	High	High	High	High	High	High	High	High	n/a	2.13e-05		1.658e-08		54		100
O35218	Cleavage and polyadenylation specificity factor subunit 2 OS=Mus musculus OX=10090 GN=Cpsf2 PE=1 SV=1	[K].LGLNCAIYATIPVYK.[M]	1xCarbamidomethyl [C5]; 1xTMTpro [K15]; 1xTMTpro [N-Term]	6.22115e-07	4.83621e-05	1	1	1	3	O35218 [78-92]	O35218 1xCarbamidomethyl [C82]	0	2304.33	0.966	0.933045	0.982007	1515.8	1569.4	10.41	4.41	1512	1517.2	1847.3	1514.4	1577.7	1683	1518.6	1561.2		High	High	High	High	High	High	High	High	High	Low	2.13e-05	0.8816	6.581e-08	1	43	1.79	100
Q9CXY9	GPI-anchor transamidase OS=Mus musculus OX=10090 GN=Pigk PE=1 SV=2	[R].LGIPDSHIVLMLADDMACNAR.[N]	1xCarbamidomethyl [C18]; 1xTMTpro [N-Term]	2.25689e-06	4.83621e-05	1	1	1	1	Q9CXY9 [75-95]	Q9CXY9 1xCarbamidomethyl [C92]	0	2616.33	0.991	0.200175	0.571789	593.4	598.6	1.31	2.7	598	600	583.5	588.9	597.7	599.5	630.7	596.7		High	High	High	High	High	High	High	High	High	n/a	2.13e-05		3.558e-07		55		100
P70303	CTP synthase 2 OS=Mus musculus OX=10090 GN=Ctps2 PE=1 SV=1	[R].LGLPINDCSSNLLFK.[W]	1xCarbamidomethyl [C8]; 1xTMTpro [K15]; 1xTMTpro [N-Term]	9.72075e-11	4.83621e-05	1	1	1	2	P70303 [270-284]	P70303 1xCarbamidomethyl [C277]	0	2299.3	0.997	0.464327	0.78115	1504.2	1509.3	11.06	3.43	1521.4	1437	1821.4	1487.1	1498.8	1519.9	1416.9	1529.3		High	High	High	High	High	High	High	High	High	n/a	2.13e-05		6.982e-13		88		100
Q3LAC4	Phosphatidylinositol 3,4,5-trisphosphate-dependent Rac exchanger 2 protein OS=Mus musculus OX=10090 GN=Prex2 PE=1 SV=2	[R].TFLLNCMLLGGR.[K]	1xCarbamidomethyl [C6]; 1xTMTpro [N-Term]	1.44656e-06	4.83621e-05	1	1	1	1	Q3LAC4 [136-147]	Q3LAC4 1xCarbamidomethyl [C141]	0	1698.94	1.121	0.455815	0.775827	859.4	766.9	7.85	10.08	870	865.4	733.3	853.4	723.8	903	746.3	788		High	High	High	High	High	High	High	High	High	n/a	2.13e-05		1.988e-07		18		100
Q3TL44	NLR family member X1 OS=Mus musculus OX=10090 GN=Nlrx1 PE=1 SV=1	[K].LGLQLNNLGPEACR.[D]	1xCarbamidomethyl [C13]; 1xTMTpro [N-Term]	1.5875e-06	4.83621e-05	1	1	1	1	Q3TL44 [755-768]	Q3TL44 1xCarbamidomethyl [C767]	0	1859.01	1.157	0.0591499	0.359973	218.2	188.6	11.39	6.11	203.4	259.6	207.9	229.1	208.2	187.7	189.5	180.9		High	High	High	High	High	High	High	High	High	n/a	2.13e-05		2.236e-07		43		100
P27612	Phospholipase A-2-activating protein OS=Mus musculus OX=10090 GN=Plaa PE=1 SV=4	[R].TFLGHEDCVR.[G]	1xCarbamidomethyl [C8]; 1xTMTpro [N-Term]	3.41759e-05	4.83621e-05	1	1	1	1	P27612 [186-195]	P27612 1xCarbamidomethyl [C193]	0	1537.78	0.993	0.598942	0.853799	264.1	266	15.83	5.61	247.7	261.8	346	266.4	254.6	277.8	251.6	279.9		High	High	High	High	High	High	High	High	High	n/a	2.13e-05		1.299e-05		49		100
Q99104	Unconventional myosin-Va OS=Mus musculus OX=10090 GN=Myo5a PE=1 SV=2	[K].LGILDLLDEECK.[MV]	1xCarbamidomethyl [C11]; 1xTMTpro [K12]; 1xTMTpro [N-Term]	8.50204e-07	4.83621e-05	1	2	1	2	Q99104 [503-514]	Q99104 1xCarbamidomethyl [C513]	0	2026.14	0.953	0.544772	0.826767	2915.8	3059.1	10.35	12.22	3131.8	2440.1	2965.2	2867.3	2566.2	2852.1	3281.1	3342.5		High	High	High	High	High	High	High	High	High	n/a	2.13e-05		9.938e-08		36		100
P35762	CD81 antigen OS=Mus musculus OX=10090 GN=Cd81 PE=1 SV=2	[K].TFHETLNCCGSNALTTLTTTILR.[N]	2xCarbamidomethyl [C8; C9]; 1xTMTpro [N-Term]	1.2559e-12	4.83621e-05	1	1	1	16	P35762 [149-171]	P35762 2xCarbamidomethyl [C156; C157]	0	2928.49	1.08	0.890725	0.970202	14257.4	13199.1	10.96	9.96	14456.4	14478.9	11376.7	14061.1	15262.4	12055.7	13124.4	13274.3		High	High	High	High	High	High	High	High	High	High	2.13e-05	0.0003185	2.389e-15	0.001571	114	1.47	100
P51175	Protoporphyrinogen oxidase OS=Mus musculus OX=10090 GN=Ppox PE=1 SV=1	[R].LGPEVASLAMDSLCR.[G]	1xCarbamidomethyl [C14]; 1xTMTpro [N-Term]	4.35061e-06	4.83621e-05	1	1	1	1	P51175 [154-168]	P51175 1xCarbamidomethyl [C167]	0	1923	1.12	0.047605	0.329875	235.3	210.1	4.5	7.67	234.1	236.5	252.7	227.5	233.3	213.3	194.3	206.9		High	High	High	High	High	High	High	High	High	n/a	2.13e-05		8.404e-07		56		100
Q9JI90	E3 ubiquitin-protein ligase RNF14 OS=Mus musculus OX=10090 GN=Rnf14 PE=1 SV=2	[K].LGSDCMYFLECK.[H]	2xCarbamidomethyl [C5; C11]; 1xTMTpro [K12]; 1xTMTpro [N-Term]	7.12147e-08	4.83621e-05	1	1	1	2	Q9JI90 [229-240]	Q9JI90 2xCarbamidomethyl [C233; C239]	0	2131.05	1.07	0.0160323	0.224185	1534.2	1433.9	3.24	2.47	1519.3	1461	1576.4	1549.3	1452.8	1372.1	1434.3	1433.4		High	High	High	High	High	High	High	High	High	n/a	2.13e-05		3.89e-09		43		100
Q9JI90	E3 ubiquitin-protein ligase RNF14 OS=Mus musculus OX=10090 GN=Rnf14 PE=1 SV=2	[K].LGSDCMYFLECKHVYCK.[A]	3xCarbamidomethyl [C5; C11; C16]; 2xTMTpro [K12; K17]; 1xTMTpro [N-Term]	2.19777e-06	4.83621e-05	1	1	1	1	Q9JI90 [229-245]	Q9JI90 3xCarbamidomethyl [C233; C239; C244]	1	3122.58	1.024	0.578178	0.844278	772.4	754.2	9.28	5.96	774.8	639.8	786.1	770	729.1	735.1	773.7	828.4		High	High	High	High	High	High	High	High	High	n/a	2.13e-05		3.422e-07		22		100
Q8BU33	2-hydroxyacyl-CoA lyase 2 OS=Mus musculus OX=10090 GN=Ilvbl PE=1 SV=1	[R].LGSDVACSLAYTDYHK.[A]	1xCarbamidomethyl [C7]; 1xTMTpro [K16]; 1xTMTpro [N-Term]	9.17197e-12	4.83621e-05	1	1	1	1	Q8BU33 [562-577]	Q8BU33 1xCarbamidomethyl [C568]	0	2408.24	1.042	0.544707	0.826767	932.7	895	2.75	12.93	957.9	945.6	900.9	919.9	1017.5	966.5	769.7	828.8		High	High	High	High	High	High	High	High	High	n/a	2.13e-05		3.211e-14		97		100
Q810C1	SLIT and NTRK-like protein 1 OS=Mus musculus OX=10090 GN=Slitrk1 PE=2 SV=1	[R].LGSEVLMSDLKCETPVNFFR.[K]	1xCarbamidomethyl [C12]; 1xTMTpro [K11]; 1xTMTpro [N-Term]	1.61927e-09	4.83621e-05	1	1	1	2	Q810C1 [547-566]	Q810C1 1xCarbamidomethyl [C558]	1	2950.57	0.76	0.06049	0.362442	1848.5	2431.3	8	17.89	1841.4	1749.7	2102.8	1855.7	2024	2133.4	2890.1	2770.8		High	High	High	High	High	High	High	High	High	n/a	2.13e-05		2.765e-11		41		100
Q9DBL1	Short/branched chain specific acyl-CoA dehydrogenase, mitochondrial OS=Mus musculus OX=10090 GN=Acadsb PE=1 SV=1	[K].LGSFCLSEAGAGSDSFAMK.[T]	1xCarbamidomethyl [C5]; 1xTMTpro [K19]; 1xTMTpro [N-Term]	3.27103e-08	4.83621e-05	1	1	1	1	Q9DBL1 [171-189]	Q9DBL1 1xCarbamidomethyl [C175]	0	2543.28	1.018	0.721075	0.906375	546.9	537	2.82	2.92	553.2	524.2	558.9	540.7	524.7	534.2	539.9	561.9		High	High	High	High	High	High	High	High	High	n/a	2.13e-05		1.397e-09		52		100
Q9D6R2	Isocitrate dehydrogenase [NAD] subunit alpha, mitochondrial OS=Mus musculus OX=10090 GN=Idh3a PE=1 SV=1	[K].TFDLYANVRPCVSIEGYK.[T]	1xCarbamidomethyl [C11]; 1xTMTpro [K18]; 1xTMTpro [N-Term]	2.11271e-09	4.83621e-05	1	1	1	9	Q9D6R2 [117-134]	Q9D6R2 1xCarbamidomethyl [C127]	1	2740.46	1.088	0.208416	0.5796	12068.3	11095.3	6.54	10.33	12597.7	10782.7	11966.1	12171.3	9386.1	10670.9	11536.6	11920		High	High	High	High	High	High	High	High	High	n/a	2.13e-05		3.911e-11		38		100
Q8BGS1	Band 4.1-like protein 5 OS=Mus musculus OX=10090 GN=Epb41l5 PE=1 SV=1	[K].IGSPYCLHLR.[V]	1xCarbamidomethyl [C6]; 1xTMTpro [N-Term]	2.27192e-06	4.83621e-05	1	1	1	1	Q8BGS1 [110-119]	Q8BGS1 1xCarbamidomethyl [C115]	0	1519.84	1.09	0.0987877	0.433735	417	382.6	5	6.24	430.6	423.6	383.8	410.5	404.7	396	353.1	369.6		High	High	High	High	High	High	High	High	High	n/a	2.13e-05		3.585e-07		61		100
Q9EPE9	Endoplasmic reticulum transmembrane helix translocase OS=Mus musculus OX=10090 GN=Atp13a1 PE=1 SV=2	[K].LGSTDLCYIAAVK.[G]	1xCarbamidomethyl [C7]; 1xTMTpro [K13]; 1xTMTpro [N-Term]	3.16538e-06	4.83621e-05	1	1	1	3	Q9EPE9 [639-651]	Q9EPE9 1xCarbamidomethyl [C645]	0	2019.14	1.047	0.723222	0.907215	2062.1	1970	6.16	5.2	2050.3	2139.3	1849.4	2074.1	2140.8	2001.9	1938.6	1906.1		High	High	High	High	High	High	High	High	High	High	2.13e-05	0.002132	2.304e-06	0.1082	34	2.83	100
Q9JHU4	Cytoplasmic dynein 1 heavy chain 1 OS=Mus musculus OX=10090 GN=Dync1h1 PE=1 SV=2	[K].TFDHYCEYRR.[T]	1xCarbamidomethyl [C6]; 1xTMTpro [N-Term]	7.85301e-05	4.83621e-05	1	1	1	2	Q9JHU4 [2632-2641]	Q9JHU4 1xCarbamidomethyl [C2637]	1	1750.83	1.009	0.614768	0.860201	597.5	592.3	5.04	12.7	561.5	593.2	634.8	601.8	737.5	611.2	574.1	567.4		High	High	High	High	High	High	High	High	High	n/a	3.58e-05		0.0001719		24		100
Q9JHU4	Cytoplasmic dynein 1 heavy chain 1 OS=Mus musculus OX=10090 GN=Dync1h1 PE=1 SV=2	[K].TFDHYCEYR.[R]	1xCarbamidomethyl [C6]; 1xTMTpro [N-Term]	5.21603e-05	4.83621e-05	1	1	1	1	Q9JHU4 [2632-2640]	Q9JHU4 1xCarbamidomethyl [C2637]	0	1594.73	0.909	0.4002	0.740554	222.8	245.1	7.28	9.45	221.2	222.2	255.8	223.4	270.4	241.6	214.5	248.7		High	High	High	High	High	High	High	High	High	n/a	2.13e-05		2.887e-05		30		100
Q8C4B4	Protein unc-119 homolog B OS=Mus musculus OX=10090 GN=Unc119b PE=1 SV=1	[K].TFDFDFGFCIPSSR.[N]	1xCarbamidomethyl [C9]; 1xTMTpro [N-Term]	2.33303e-06	4.83621e-05	1	1	1	2	Q8C4B4 [185-198]	Q8C4B4 1xCarbamidomethyl [C193]	0	1999.95	1.05	0.280188	0.64989	1138.1	1083.8	5.47	1.7	1123.5	1188.2	1043.5	1153	1070.4	1068.2	1097.3	1104.4		High	High	High	High	High	High	High	High	High	n/a	2.13e-05		3.704e-07		18		100
Q922B2	Aspartate--tRNA ligase, cytoplasmic OS=Mus musculus OX=10090 GN=Dars1 PE=1 SV=2	[K].IGSCTQQDVELHVQK.[I]	1xCarbamidomethyl [C4]; 1xTMTpro [K15]; 1xTMTpro [N-Term]	1.73061e-09	4.83621e-05	1	1	1	2	Q922B2 [127-141]	Q922B2 1xCarbamidomethyl [C130]	0	2350.27	0.96	0.0223509	0.253389	1492.3	1554.9	2.01	1.74	1519.6	1485.5	1499.1	1448.7	1576.9	1515	1564.7	1545.1		High	High	High	High	High	High	High	High	High	Low	2.13e-05	0.892	3.005e-11	1	50	1.85	100
Q07076	Annexin A7 OS=Mus musculus OX=10090 GN=Anxa7 PE=1 SV=2	[R].LGTDESCFNMILATR.[S]	1xCarbamidomethyl [C7]; 1xTMTpro [N-Term]	9.51219e-10	4.83621e-05	1	1	1	5	Q07076 [332-346]	Q07076 1xCarbamidomethyl [C338]	0	2032.02	1.082	0.380837	0.727041	4453.7	4115.2	9.3	2.87	4425.6	4605.1	3717.2	4481.9	4139.4	3914.4	4091.1	4180.2		High	High	High	High	High	High	High	High	High	Low	2.13e-05	0.7397	1.379e-11	1	46	1.52	100
P58252	Elongation factor 2 OS=Mus musculus OX=10090 GN=Eef2 PE=1 SV=2	[R].TFCQLILDPIFK.[V]	1xCarbamidomethyl [C3]; 1xTMTpro [K12]; 1xTMTpro [N-Term]	6.64867e-07	4.83621e-05	1	1	1	4	P58252 [288-299]	P58252 1xCarbamidomethyl [C290]	0	2103.22	0.943	0.64765	0.876678	2271.2	2407.9	11.31	4.75	2242.1	2081.9	2701.9	2300.6	2240.4	2391.9	2424	2513.6		High	High	High	High	High	High	High	High	High	High	2.13e-05	0.0003185	7.172e-08	0.01112	35	2.81	100
Q8K1A6	Coiled-coil and C2 domain-containing protein 1A OS=Mus musculus OX=10090 GN=Cc2d1a PE=1 SV=2	[K].LGTLETACEVHEILEVLDGR.[R]	1xCarbamidomethyl [C8]; 1xTMTpro [N-Term]	8.0693e-11	4.83621e-05	1	1	1	1	Q8K1A6 [751-770]	Q8K1A6 1xCarbamidomethyl [C758]	0	2558.35	0.823	0.0104752	0.190848	512	622.1	8.37	3.23	545.1	518.7	445.5	505.4	603.2	608.4	636	644		High	High	High	High	High	High	High	High	High	n/a	2.13e-05		5.464e-13		102		100
Q9CQR4	Acyl-coenzyme A thioesterase 13 OS=Mus musculus OX=10090 GN=Acot13 PE=1 SV=1	[K].LGTLHGGLTATLVDSISTMALMCTER.[G]	1xCarbamidomethyl [C23]; 1xTMTpro [N-Term]	2.69819e-12	4.83621e-05	1	1	1	24	Q9CQR4 [52-77]	Q9CQR4 1xCarbamidomethyl [C74]	0	3052.58	0.976	0.834097	0.948616	3665.2	3755.2	4.54	4.38	3581	3965.1	3656.8	3673.7	3932	3535.8	3786.1	3724.5		High	High	High	High	High	High	High	High	High	High	2.13e-05	0.0003185	6.454e-15	1.776e-05	59	4.31	100
Q8QZZ7	EKC/KEOPS complex subunit Tprkb OS=Mus musculus OX=10090 GN=Tprkb PE=1 SV=1	[R].IGTLLDAIICR.[M]	1xCarbamidomethyl [C10]; 1xTMTpro [N-Term]	4.7731e-06	4.83621e-05	1	1	1	1	Q8QZZ7 [158-168]	Q8QZZ7 1xCarbamidomethyl [C167]	0	1548.91	1.008	0.524747	0.817492	1213.7	1203.9	10.22	6.31	1201.8	1179.9	1458.7	1225.8	1162.5	1307.2	1141.7	1246.8		High	High	High	High	High	High	High	High	High	n/a	2.13e-05		9.527e-07		20		100
Q9CWE0	Mitochondrial fission regulator 1-like OS=Mus musculus OX=10090 GN=Mtfr1l PE=1 SV=1	[R].IGTNLPLKPCPR.[A]	1xCarbamidomethyl [C10]; 1xTMTpro [K8]; 1xTMTpro [N-Term]	7.58096e-06	4.83621e-05	1	1	1	2	Q9CWE0 [25-36]	Q9CWE0 1xCarbamidomethyl [C34]	1	1974.18	1.063	0.242523	0.612893	2493.7	2344.8	7.19	7.58	2559.3	2429.7	2305.8	2726.3	2152.1	2231.2	2464.2	2519.1		High	High	High	High	High	High	High	High	High	n/a	2.13e-05		1.748e-06		27		100
Q99LC8	Translation initiation factor eIF-2B subunit alpha OS=Mus musculus OX=10090 GN=Eif2b1 PE=1 SV=1	[K].IGTNQMAVCAK.[A]	1xCarbamidomethyl [C9]; 1xTMTpro [K11]; 1xTMTpro [N-Term]	8.73697e-05	4.83621e-05	1	1	1	1	Q99LC8 [210-220]	Q99LC8 1xCarbamidomethyl [C218]	0	1801	1.036	0.306849	0.673221	332	320.6	8.4	8.71	313.8	380.3	331.1	332.8	341.3	340.6	286.8	301.7		High	High	High	High	High	High	High	High	High	n/a	2.13e-05		4.861e-05		28		100
Q8BWF0	Succinate-semialdehyde dehydrogenase, mitochondrial OS=Mus musculus OX=10090 GN=Aldh5a1 PE=1 SV=1	[K].LGTVADCGVPEAR.[A]	1xCarbamidomethyl [C7]; 1xTMTpro [N-Term]	1.69648e-06	4.83621e-05	1	1	1	1	Q8BWF0 [75-87]	Q8BWF0 1xCarbamidomethyl [C81]	0	1648.86	1.824	0.065312	0.372045	687.6	376.9	41.62	16.74	1106.9	884.2	442.4	534.6	410.3	346.2	332.3	474.8		High	High	High	High	High	High	High	High	High	Low	2.13e-05	0.9618	2.453e-07	1	58	1.12	100
Q6NWV3	Intraflagellar transport protein 122 homolog OS=Mus musculus OX=10090 GN=Ift122 PE=1 SV=1	[R].LGTVGEQNSWVWTCR.[V]	1xCarbamidomethyl [C14]; 1xTMTpro [N-Term]	7.15294e-07	4.83621e-05	1	1	1	1	Q6NWV3 [255-269]	Q6NWV3 1xCarbamidomethyl [C268]	0	2097.05	1.063	0.195192	0.565818	430.2	404.6	10.23	5.3	417.3	502.9	399.6	443.4	428.3	402.7	406.6	376.2		High	High	High	High	High	High	High	High	High	Low	2.13e-05	0.9682	7.928e-08	1	71	2.01	100
Q9D4F2	Polyisoprenoid diphosphate/phosphate phosphohydrolase PLPP6 OS=Mus musculus OX=10090 GN=Plpp6 PE=1 SV=1	[K].LGVCAGESSAWGSVRPLMK.[L]	1xCarbamidomethyl [C4]; 1xTMTpro [K19]; 1xTMTpro [N-Term]	3.17058e-13	4.83621e-05	1	1	1	1	Q9D4F2 [114-132]	Q9D4F2 1xCarbamidomethyl [C117]	1	2613.41	0.948	0.784705	0.93128	1830.7	1930.2	13.39	16.92	2092.4	1882	1507.2	1780.8	2140.8	2148.3	1740.3	1499.5		High	High	High	High	High	High	High	High	High	n/a	2.13e-05		1.011e-15		44		100
O54692	Centromere/kinetochore protein zw10 homolog OS=Mus musculus OX=10090 GN=Zw10 PE=1 SV=3	[R].LGTECFLAQMQAQK.[G]	1xCarbamidomethyl [C5]; 1xTMTpro [K14]; 1xTMTpro [N-Term]	2.04304e-06	4.83621e-05	1	1	1	1	O54692 [584-597]	O54692 1xCarbamidomethyl [C588]	0	2233.2	0.966	0.408806	0.748708	799.2	827.5	4.5	4.19	820.4	806.6	739.1	792	827.9	760.7	831.1	827.1		High	High	High	High	High	High	High	High	High	n/a	2.13e-05		3.119e-07		38		100
Q8R127	Saccharopine dehydrogenase-like oxidoreductase OS=Mus musculus OX=10090 GN=Sccpdh PE=1 SV=1	[K].LGRPSLSSEVGVIICDISNPASLDEMAK.[Q]	1xCarbamidomethyl [C15]; 1xTMTpro [K28]; 1xTMTpro [N-Term]	8.7396e-11	4.83621e-05	1	1	1	3	Q8R127 [63-90]	Q8R127 1xCarbamidomethyl [C77]	1	3566.91	1.167	0.159435	0.521207	1460	1251.1	15.5	9.06	1745.7	1402.8	1519.6	1201.4	1377.4	1137.4	1182.4	1323.9		High	High	High	High	High	High	High	High	High	n/a	2.13e-05		6.096e-13		54		100
Q3U1J4	DNA damage-binding protein 1 OS=Mus musculus OX=10090 GN=Ddb1 PE=1 SV=2	[R].IGRPSETGIIGIIDPECR.[M]	1xCarbamidomethyl [C17]; 1xTMTpro [N-Term]	5.97794e-07	4.83621e-05	1	1	1	1	Q3U1J4 [112-129]	Q3U1J4 1xCarbamidomethyl [C128]	1	2287.24	1.111	0.147863	0.507706	702.3	632.1	19.16	12.5	674.5	716.4	984.6	688.6	545.4	721.5	592.9	674		High	High	High	High	High	High	High	High	High	n/a	2.13e-05		6.278e-08		31		100
Q8VD12	Zinc finger protein 385A OS=Mus musculus OX=10090 GN=Znf385a PE=1 SV=2	[R].TFHCEICNVK.[V]	2xCarbamidomethyl [C4; C7]; 1xTMTpro [K10]; 1xTMTpro [N-Term]	2.8582e-07	4.83621e-05	1	1	1	1	Q8VD12 [260-269]	Q8VD12 2xCarbamidomethyl [C263; C266]	0	1916	0.897	0.39296	0.735716	676.7	754	7.39	21.71	641	686.3	667.2	759.6	992.2	835.9	612.8	680.1		High	High	High	High	High	High	High	High	High	n/a	2.13e-05		2.388e-08		49		100
Q9Z1M4	Ribosomal protein S6 kinase beta-2 OS=Mus musculus OX=10090 GN=Rps6kb2 PE=1 SV=1	[R].IGPHCFELLSVLGK.[G]	1xCarbamidomethyl [C5]; 1xTMTpro [K14]; 1xTMTpro [N-Term]	1.77719e-06	4.83621e-05	1	1	1	1	Q9Z1M4 [62-75]	Q9Z1M4 1xCarbamidomethyl [C66]	0	2178.26	0.995	0.949824	0.986246	556.5	559.6	4.32	2.52	545.5	527.1	567.7	581.4	557.3	561.9	564.1	533.7		High	High	High	High	High	High	High	High	High	n/a	2.13e-05		2.612e-07		27		100
Q8R1C0	Potassium voltage-gated channel subfamily C member 4 OS=Mus musculus OX=10090 GN=Kcnc4 PE=2 SV=1	[R].LGPHEGGSGPGAGSGGCRGWQPR.[M]	1xCarbamidomethyl [C17]; 1xTMTpro [N-Term]	1.74528e-05	4.83621e-05	1	1	1	1	Q8R1C0 [193-215]	Q8R1C0 1xCarbamidomethyl [C209]	1	2538.23	1.318	0.1793	0.546179	412.4	312.8	16.86	21.07	404.2	501.2	331	420.9	445.2	333.5	293.5	292.7		High	High	High	High	High	High	High	High	High	n/a	2.13e-05		5.277e-06		31		100
Q9QVP9	Protein-tyrosine kinase 2-beta OS=Mus musculus OX=10090 GN=Ptk2b PE=1 SV=2	[R].IGPNIQLAECYGLR.[L]	1xCarbamidomethyl [C10]; 1xTMTpro [N-Term]	3.14446e-06	4.83621e-05	1	1	1	8	Q9QVP9 [80-93]	Q9QVP9 1xCarbamidomethyl [C89]	0	1908.03	1.056	0.0328378	0.288792	4768.9	4517	2.39	3.38	4668.8	4943.6	4776.8	4760.9	4325.5	4494.2	4696.5	4539.9		High	High	High	High	High	High	High	High	High	n/a	2.13e-05		5.517e-07		42		100
P24270	Catalase OS=Mus musculus OX=10090 GN=Cat PE=1 SV=4	[R].LGPNYLQIPVNCPYR.[A]	1xCarbamidomethyl [C12]; 1xTMTpro [N-Term]	1.24493e-07	4.83621e-05	1	1	1	2	P24270 [366-380]	P24270 1xCarbamidomethyl [C377]	0	2108.13	1.182	0.00196134	0.11906	1470.7	1244.5	4.16	1.66	1463.6	1536.1	1387.9	1477.9	1264.1	1248.9	1215	1240.1		High	High	High	High	High	High	High	High	High	n/a	2.13e-05		8.018e-09		65		100
B1AY13	Ubiquitin carboxyl-terminal hydrolase 24 OS=Mus musculus OX=10090 GN=Usp24 PE=1 SV=1	[K].TFFENVNLCDHR.[L]	1xCarbamidomethyl [C9]; 1xTMTpro [N-Term]	8.16972e-07	4.83621e-05	1	1	1	2	B1AY13 [791-802]	B1AY13 1xCarbamidomethyl [C799]	0	1855.91	1.078	0.147816	0.507635	830.1	770	6.67	4.26	778.2	892.7	794.3	867.4	824.4	761.8	778.3	748.3		High	High	High	High	High	High	High	High	High	n/a	2.13e-05		9.414e-08		68		100
Q0GNC1	Inverted formin-2 OS=Mus musculus OX=10090 GN=Inf2 PE=1 SV=1	[K].LGPQDSDPTEANLESAEPELCIR.[L]	1xCarbamidomethyl [C21]; 1xTMTpro [N-Term]	1.98997e-09	4.83621e-05	1	1	1	1	Q0GNC1 [18-40]	Q0GNC1 1xCarbamidomethyl [C38]	0	2845.38	0.757	0.0218532	0.25166	321.8	424.9	5.37	16.37	293	318.8	332.2	324.8	536.3	377.8	459	393.2		High	High	High	High	High	High	High	High	High	n/a	2.13e-05		3.612e-11		78		100
Q8VEE0	Ribulose-phosphate 3-epimerase OS=Mus musculus OX=10090 GN=Rpe PE=1 SV=1	[K].IGPSILNSDLANLGAECLR.[M]	1xCarbamidomethyl [C17]; 1xTMTpro [N-Term]	6.13693e-06	4.83621e-05	1	1	1	1	Q8VEE0 [7-25]	Q8VEE0 1xCarbamidomethyl [C23]	0	2317.25	1.012	0.887897	0.969208	210.7	208.2	16.47	9.01	194.6	255.7	176.5	228.1	232.9	212.7	203.8	187.7		High	High	High	High	High	High	High	High	High	n/a	2.13e-05		1.321e-06		35		100
Q6GV12	3-ketodihydrosphingosine reductase OS=Mus musculus OX=10090 GN=Kdsr PE=1 SV=1	[K].LGPVDMLVNCAGTSMSGK.[F]	1xCarbamidomethyl [C10]; 1xTMTpro [K18]; 1xTMTpro [N-Term]	1.12544e-05	4.83621e-05	1	1	1	1	Q6GV12 [112-129]	Q6GV12 1xCarbamidomethyl [C121]	0	2445.28	1.046	0.164977	0.526858	749.4	716.7	11.28	6.54	730.2	762.1	918.5	736.9	724	754.2	644.4	709.4		High	High	High	High	High	High	High	High	High	n/a	2.13e-05		2.941e-06		54		100
Q9JJ28	Protein flightless-1 homolog OS=Mus musculus OX=10090 GN=Flii PE=1 SV=1	[K].LGQELCGMLHRPR.[H]	1xCarbamidomethyl [C6]; 1xTMTpro [N-Term]	1.60328e-05	4.83621e-05	1	1	1	2	Q9JJ28 [803-815]	Q9JJ28 1xCarbamidomethyl [C808]	1	1871.01	0.923	0.0317427	0.287093	267.5	289.9	5.64	3.65	264.1	271	240.8	273.1	302.6	289.8	290.1	276.7		High	High	High	High	High	High	High	High	High	n/a	2.13e-05		4.711e-06		24		100
Q04736	Tyrosine-protein kinase Yes OS=Mus musculus OX=10090 GN=Yes1 PE=1 SV=3	[K].LGQGCFGEVWMGTWNGTTK.[V]	1xCarbamidomethyl [C5]; 1xTMTpro [K19]; 1xTMTpro [N-Term]	5.35046e-08	4.83621e-05	1	1	1	1	Q04736 [281-299]	Q04736 1xCarbamidomethyl [C285]	0	2737.37	0.988	0.262614	0.632041	509.3	515.4	3.9	2.52	519.4	499.4	522.2	479.9	510.5	539.1	518.4	512.3		High	High	High	High	High	High	High	High	High	n/a	2.13e-05		2.678e-09		38		100
P05480	Proto-oncogene tyrosine-protein kinase Src OS=Mus musculus OX=10090 GN=Src PE=1 SV=5	[K].LGQGCFGEVWMGTWNGTTR.[V]	1xCarbamidomethyl [C5]; 1xTMTpro [N-Term]	4.00721e-10	4.83621e-05	1	1	1	2	P05480 [275-293]	P05480 1xCarbamidomethyl [C279]	0	2461.17	1.033	0.226253	0.595998	1695.5	1641	2.63	5.37	1710.6	1727.6	1626.5	1680.6	1498.5	1677	1686.9	1605.8		High	High	High	High	High	High	High	High	High	Low	2.13e-05	0.935	4.451e-12	1	60	1.38	100
O55029	Coatomer subunit beta' OS=Mus musculus OX=10090 GN=Copb2 PE=1 SV=2	[K].TFEVCDLPVR.[A]	1xCarbamidomethyl [C5]; 1xTMTpro [N-Term]	5.55017e-05	4.83621e-05	1	1	1	2	O55029 [52-61]	O55029 1xCarbamidomethyl [C56]	0	1539.82	1.044	0.193703	0.564365	1524.8	1460.3	4.51	4.51	1529.3	1561.2	1406	1520.3	1339	1477.5	1471.3	1449.3		High	High	High	High	High	High	High	High	High	High	2.13e-05	0.00993	2.544e-05	0.2269	23	1.87	100
Q80T41	Gamma-aminobutyric acid type B receptor subunit 2 OS=Mus musculus OX=10090 GN=Gabbr2 PE=1 SV=2	[K].TFETLCTVR.[T]	1xCarbamidomethyl [C6]; 1xTMTpro [N-Term]	2.14929e-05	4.83621e-05	1	1	1	1	Q80T41 [547-555]	Q80T41 1xCarbamidomethyl [C552]	0	1430.76	0.882	0.050253	0.337055	651.4	738.9	5	5.88	626.3	667.9	635.4	698.3	661.7	755.5	746.7	731.1		High	High	High	High	High	High	High	High	High	n/a	2.13e-05		6.934e-06		32		100
Q80V86	Integrator complex subunit 8 OS=Mus musculus OX=10090 GN=Ints8 PE=1 SV=1	[K].LGQLLAATCK.[E]	1xCarbamidomethyl [C9]; 1xTMTpro [K10]; 1xTMTpro [N-Term]	4.96219e-05	4.83621e-05	1	1	1	1	Q80V86 [693-702]	Q80V86 1xCarbamidomethyl [C701]	0	1683.01	0.995	0.935403	0.98226	384.6	386.5	5.51	5.21	398.1	351.4	392.6	376.7	349.1	391.5	385.4	387.7		High	High	High	High	High	High	High	High	High	n/a	2.13e-05		2.168e-05		47		100
Q61425	Hydroxyacyl-coenzyme A dehydrogenase, mitochondrial OS=Mus musculus OX=10090 GN=Hadh PE=1 SV=2	[K].TFESLVDFCK.[T]	1xCarbamidomethyl [C9]; 1xTMTpro [K10]; 1xTMTpro [N-Term]	1.80095e-06	4.83621e-05	1	1	1	2	Q61425 [193-202]	Q61425 1xCarbamidomethyl [C201]	0	1854	1.097	0.303123	0.670041	2181.7	1988.6	12.67	10.81	2461.3	1898.8	2379.2	2000.5	1721.9	2043.1	1935.6	2236.2		High	High	High	High	High	High	High	High	High	n/a	2.13e-05		2.655e-07		57		100
P70665	Sialate O-acetylesterase OS=Mus musculus OX=10090 GN=Siae PE=1 SV=3	[K].TFEISCCSDRHCK.[W]	3xCarbamidomethyl [C6; C7; C12]; 1xTMTpro [K13]; 1xTMTpro [N-Term]	5.51589e-05	4.83621e-05	1	1	1	1	P70665 [464-476]	P70665 3xCarbamidomethyl [C469; C470; C475]	1	2308.11	1.095	0.267271	0.63614	467.8	427.3	8.51	8.98	436.7	475.6	460.2	531.9	501.3	429.7	424.9	414		High	High	High	High	High	High	High	High	n/a	High		0.002853		0.1193		1.84	100
Q3UH93	Plexin-D1 OS=Mus musculus OX=10090 GN=Plxnd1 PE=1 SV=1	[K].IGQVSCDIQIISDR.[V]	1xCarbamidomethyl [C6]; 1xTMTpro [N-Term]	1.08991e-07	4.83621e-05	1	1	1	3	Q3UH93 [1217-1230]	Q3UH93 1xCarbamidomethyl [C1222]	0	1908.02	0.892	0.28514	0.653538	2977.3	3336.5	12.65	15.68	3151	3082.2	2350	2875.9	2587.2	3538.1	3748.4	3146.5		High	High	High	High	High	High	High	High	High	n/a	2.13e-05		6.76e-09		33		100
Q922S4	cGMP-dependent 3',5'-cyclic phosphodiesterase OS=Mus musculus OX=10090 GN=Pde2a PE=1 SV=4	[R].LGQVVEDKQCIQLK.[D]	1xCarbamidomethyl [C10]; 2xTMTpro [K8; K14]; 1xTMTpro [N-Term]	8.59289e-06	4.83621e-05	1	1	1	2	Q922S4 [291-304]	Q922S4 1xCarbamidomethyl [C300]	1	2570.52	0.862	0.744579	0.915104	1953.3	2264.9	26.77	15.37	2238.4	1668.1	2880.5	1704.6	1766	2100.8	2494.1	2441.7		High	High	High	High	High	High	High	High	High	High	2.13e-05	0.0003185	2.055e-06	5.475e-05	25	5.14	100
Q3TC72	Fumarylacetoacetate hydrolase domain-containing protein 2A OS=Mus musculus OX=10090 GN=Fahd2 PE=1 SV=1	[K].TFDTFCPLGPALVTK.[D]	1xCarbamidomethyl [C6]; 1xTMTpro [K15]; 1xTMTpro [N-Term]	2.02013e-10	4.83621e-05	1	1	1	2	Q3TC72 [209-223]	Q3TC72 1xCarbamidomethyl [C214]	0	2275.27	1.201	0.00513625	0.152612	987.5	822.1	6.32	6.06	1038.6	964.9	1010.6	897.1	835.5	808.9	737.9	846.9		High	High	High	High	High	High	High	High	High	n/a	2.13e-05		1.812e-12		82		100
P07214	SPARC OS=Mus musculus OX=10090 GN=Sparc PE=1 SV=1	[K].TFDSSCHFFATKCTLEGTK.[K]	2xCarbamidomethyl [C6; C13]; 2xTMTpro [K12; K19]; 1xTMTpro [N-Term]	1.82502e-06	4.83621e-05	1	1	1	2	P07214 [117-135]	P07214 2xCarbamidomethyl [C122; C129]	1	3149.62	0.534	0.0134695	0.212452	952	1782.3	7.36	27.13	963	941.2	975.4	826.4	2388.1	2158.9	1471.5	1374.7		High	High	High	High	High	High	High	High	n/a	High		0.0003185		4.234e-07		5.07	100
P07214	SPARC OS=Mus musculus OX=10090 GN=Sparc PE=1 SV=1	[K].TFDSSCHFFATK.[C]	1xCarbamidomethyl [C6]; 1xTMTpro [K12]; 1xTMTpro [N-Term]	2.08413e-06	4.83621e-05	1	1	1	2	P07214 [117-128]	P07214 1xCarbamidomethyl [C122]	0	2056.05	0.731	0.0434572	0.319367	1268.7	1735.2	11.83	20.18	1331.1	1209.2	1486.8	1138.2	2182.7	2020	1480	1490.5		High	High	High	High	High	High	High	High	High	n/a	2.13e-05		3.196e-07		31		100
Q6ZWX6	Eukaryotic translation initiation factor 2 subunit 1 OS=Mus musculus OX=10090 GN=Eif2s1 PE=1 SV=3	[R].IGRNECVVVIR.[V]	1xCarbamidomethyl [C6]; 1xTMTpro [N-Term]	4.37699e-05	4.83621e-05	1	1	1	1	Q6ZWX6 [65-75]	Q6ZWX6 1xCarbamidomethyl [C70]	1	1618.94	0.917	0.605694	0.857434	278.9	304	12.51	5.18	259.7	266.8	339.7	291.5	276.6	311.1	307.3	300.7		High	High	High	High	High	High	High	High	High	n/a	2.13e-05		2.682e-05		31		100
Q9CQB5	CDGSH iron-sulfur domain-containing protein 2 OS=Mus musculus OX=10090 GN=Cisd2 PE=1 SV=1	[K].TFPACDGSHNK.[H]	1xCarbamidomethyl [C5]; 1xTMTpro [K11]; 1xTMTpro [N-Term]	3.20763e-06	4.83621e-05	1	1	1	1	Q9CQB5 [106-116]	Q9CQB5 1xCarbamidomethyl [C110]	0	1841.95	1.077	0.403396	0.743595	755.5	701.4	14.75	7.2	845.8	715.5	596.8	797.7	605.3	705.6	704.1	698.7		High	High	High	High	High	High	High	High	High	n/a	2.13e-05		5.663e-07		26		100
O70318	Band 4.1-like protein 2 OS=Mus musculus OX=10090 GN=Epb41l2 PE=1 SV=2	[K].LGVCANGLLIYK.[D]	1xCarbamidomethyl [C4]; 1xTMTpro [K12]; 1xTMTpro [N-Term]	1.01304e-07	4.83621e-05	1	1	1	5	O70318 [414-425]	O70318 1xCarbamidomethyl [C417]	0	1929.15	1.053	0.571106	0.840707	3722.1	3534.4	0.72	8.98	3733.3	3711	3689.5	3751.3	4074.9	3369.1	3403.8	3670		High	High	High	High	High	High	High	High	High	High	2.13e-05	0.0003185	6.14e-09	0.01039	56	3.57	100
Q07417	Short-chain specific acyl-CoA dehydrogenase, mitochondrial OS=Mus musculus OX=10090 GN=Acads PE=1 SV=2	[R].IGIASQALGIAQASLDCAVK.[Y]	1xCarbamidomethyl [C17]; 1xTMTpro [K20]; 1xTMTpro [N-Term]	1.80106e-09	4.83621e-05	1	1	1	3	Q07417 [273-292]	Q07417 1xCarbamidomethyl [C289]	0	2594.48	1.123	0.0475942	0.329875	1339.6	1192.6	7.39	3.44	1413.5	1269.5	1437.7	1242.5	1220.6	1165.2	1157.2	1240.9		High	High	High	High	High	High	High	High	High	n/a	2.13e-05		3.185e-11		93		100
P47738	Aldehyde dehydrogenase, mitochondrial OS=Mus musculus OX=10090 GN=Aldh2 PE=1 SV=1	[K].TFPTVNPSTGEVICQVAEGNK.[E]	1xCarbamidomethyl [C14]; 1xTMTpro [K21]; 1xTMTpro [N-Term]	4.06086e-10	4.83621e-05	1	1	1	3	P47738 [55-75]	P47738 1xCarbamidomethyl [C68]	0	2856.51	1.107	0.102822	0.438614	1932.3	1745.9	12.28	3.98	1953.9	1911	2384.1	1831.1	1762.7	1729.2	1690.2	1854.2		High	High	High	High	High	High	High	High	High	n/a	2.13e-05		4.518e-12		68		100
Q62132	Receptor-type tyrosine-protein phosphatase R OS=Mus musculus OX=10090 GN=Ptprr PE=1 SV=1	[R].TGCFIATSIGCQQLK.[E]	2xCarbamidomethyl [C3; C11]; 1xTMTpro [K15]; 1xTMTpro [N-Term]	3.73583e-06	4.83621e-05	1	1	1	1	Q62132 [594-608]	Q62132 2xCarbamidomethyl [C596; C604]	0	2292.23	1.031	0.561346	0.836105	688.8	668.2	7.95	7.08	609.2	702.4	737.1	675.3	596.9	648.1	699.4	689		High	High	High	High	High	High	High	High	High	n/a	2.13e-05		6.904e-07		20		100
Q8BGG7	Ubiquitin-associated and SH3 domain-containing protein B OS=Mus musculus OX=10090 GN=Ubash3b PE=1 SV=1	[K].LGCDWVATIFSR.[D]	1xCarbamidomethyl [C3]; 1xTMTpro [N-Term]	5.05601e-05	4.83621e-05	1	1	1	1	Q8BGG7 [227-238]	Q8BGG7 1xCarbamidomethyl [C229]	0	1728.91	1.079	0.0641569	0.370434	297.4	275.6	5.96	7.89	281.7	286.2	309	318.8	234.7	275.2	276	278.5		High	High	High	High	High	High	High	High	High	n/a	2.13e-05		2.22e-05		32		100
Q9Z2A0	3-phosphoinositide-dependent protein kinase 1 OS=Mus musculus OX=10090 GN=Pdpk1 PE=1 SV=2	[R].LGCEEMEGYGPLK.[A]	1xCarbamidomethyl [C3]; 1xTMTpro [K13]; 1xTMTpro [N-Term]	1.4159e-05	4.83621e-05	1	1	1	1	Q9Z2A0 [328-340]	Q9Z2A0 1xCarbamidomethyl [C330]	0	2091.07	0.947	0.309348	0.675465	851.7	899.5	5.46	8.18	842.7	850.3	943.6	853.2	1028.2	922.4	877.1	860.6		High	High	High	High	High	High	High	High	High	n/a	2.13e-05		4e-06		20		100
Q61171	Peroxiredoxin-2 OS=Mus musculus OX=10090 GN=Prdx2 PE=1 SV=3	[K].LGCEVLGVSVDSQFTHLAWINTPR.[K]	1xCarbamidomethyl [C3]; 1xTMTpro [N-Term]	7.40328e-15	4.83621e-05	1	1	1	131	Q61171 [68-91]	Q61171 1xCarbamidomethyl [C70]	0	3003.57	1.076	0.174785	0.540265	65170.7	60569	17.12	4.86	62840.9	67587	87190.8	61319.3	62572.4	59640.4	55942.7	61512		High	High	High	High	High	High	High	High	High	High	2.13e-05	0.001778	2.665e-16	0.08993	121	3.76	100
Q07417	Short-chain specific acyl-CoA dehydrogenase, mitochondrial OS=Mus musculus OX=10090 GN=Acads PE=1 SV=2	[K].IGCFALSEPGNGSDAGAASTTAR.[E]	1xCarbamidomethyl [C3]; 1xTMTpro [N-Term]	5.35224e-12	4.83621e-05	1	1	1	2	Q07417 [149-171]	Q07417 1xCarbamidomethyl [C151]	0	2514.22	1.189	0.00053127	0.0898373	877.6	738.3	3.46	4.34	869.9	934	868.1	885.3	742.2	761.2	686.7	734.5		High	High	High	High	High	High	High	High	High	n/a	2.13e-05		1.587e-14		125		100
Q6ZPJ3	(E3-independent) E2 ubiquitin-conjugating enzyme UBE2O OS=Mus musculus OX=10090 GN=Ube2o PE=1 SV=3	[R].LGCFDHAQR.[Q]	1xCarbamidomethyl [C3]; 1xTMTpro [N-Term]	7.13347e-05	4.83621e-05	1	1	1	6	Q6ZPJ3 [334-342]	Q6ZPJ3 1xCarbamidomethyl [C336]	0	1407.71	1.067	0.331551	0.694309	2427	2273.7	5.56	4.93	2445.3	2541.8	2408.9	2222.6	2477.3	2261.9	2220.3	2285.6		High	High	High	High	High	High	High	High	High	High	2.13e-05	0.005775	3.636e-05	0.1784	49	2.75	100
P54830	Tyrosine-protein phosphatase non-receptor type 5 OS=Mus musculus OX=10090 GN=Ptpn5 PE=1 SV=2	[R].TGCFIATSICCQQLRR.[E]	3xCarbamidomethyl [C3; C10; C11]; 1xTMTpro [N-Term]	2.07034e-06	4.83621e-05	1	1	1	1	P54830 [479-494]	P54830 3xCarbamidomethyl [C481; C488; C489]	1	2275.14	0.911	0.44843	0.770634	492.6	540.4	5.53	12.43	474.9	510.9	463.6	519.6	437.2	569.1	579.5	513.1		High	High	High	High	High	High	High	High	High	n/a	2.13e-05		3.169e-07		19		100
O09106	Histone deacetylase 1 OS=Mus musculus OX=10090 GN=Hdac1 PE=1 SV=1	[R].LGCFNLTIK.[G]	1xCarbamidomethyl [C3]; 1xTMTpro [K9]; 1xTMTpro [N-Term]	2.67808e-05	4.83621e-05	1	1	1	2	O09106 [271-279]	O09106 1xCarbamidomethyl [C273]	0	1673.99	1.031	0.650006	0.877726	1816.4	1762.5	10.65	7.03	1794.7	1631.1	2104.3	1838.4	1696.7	1937.6	1666.6	1830.8		High	High	High	High	High	High	High	High	High	Medium	2.13e-05	0.04701	9.324e-06	0.401	33	2.34	100
P70288	Histone deacetylase 2 OS=Mus musculus OX=10090 GN=Hdac2 PE=1 SV=1	[R].LGCFNLTVK.[G]	1xCarbamidomethyl [C3]; 1xTMTpro [K9]; 1xTMTpro [N-Term]	6.83739e-05	4.83621e-05	1	1	1	3	P70288 [272-280]	P70288 1xCarbamidomethyl [C274]	0	1659.97	0.953	0.636462	0.870379	2962.7	3110.4	9.81	2.73	2916.9	2786.3	3473.5	3009.3	3037.8	3201.9	3047.3	3174.7		High	High	High	High	High	High	High	High	High	High	2.13e-05	0.0005594	3.398e-05	0.03071	22	1.89	100
Q3UYH7	Beta-adrenergic receptor kinase 2 OS=Mus musculus OX=10090 GN=Adrbk2 PE=1 SV=2	[R].LGCGGGGAR.[E]	1xCarbamidomethyl [C3]; 1xTMTpro [N-Term]	4.93128e-05	4.83621e-05	1	1	1	1	Q3UYH7 [437-445]	Q3UYH7 1xCarbamidomethyl [C439]	0	1108.59	0.86	0.106435	0.444537	713	828.9	13.71	7.55	846.9	749.3	616	678.5	777.7	923.6	851	807.4		High	High	High	High	High	High	High	High	High	Low	2.13e-05	0.5559	2.15e-05	0.9463	38	1.64	100
Q8BM13	Noelin-2 OS=Mus musculus OX=10090 GN=Olfm2 PE=1 SV=2	[K].LGCGKLTGVSNPITIR.[A]	1xCarbamidomethyl [C3]; 1xTMTpro [K5]; 1xTMTpro [N-Term]	6.99322e-09	4.83621e-05	1	1	1	1	Q8BM13 [187-202]	Q8BM13 1xCarbamidomethyl [C189]	1	2294.35	0.877	0.221998	0.592345	1334.6	1522.7	15.53	18.41	1319.7	1349.7	970	1398.1	1367.7	1179.1	1766.1	1695.2		High	High	High	High	High	High	High	High	High	n/a	2.13e-05		1.875e-10		35		100
Q8K411	Presequence protease, mitochondrial OS=Mus musculus OX=10090 GN=Pitrm1 PE=1 SV=1	[K].LGCGILNYR.[E]	1xCarbamidomethyl [C3]; 1xTMTpro [N-Term]	2.29328e-05	4.83621e-05	1	1	1	1	Q8K411 [625-633]	Q8K411 1xCarbamidomethyl [C627]	0	1369.76	1.047	0.666455	0.884003	965.2	921.8	12.72	9.54	1045.7	929.1	1002.6	774.1	952	892.5	782.8	975.3		High	High	High	High	High	High	High	High	High	Low	2.13e-05	0.2264	7.575e-06	0.6993	34	1.18	100
P54830	Tyrosine-protein phosphatase non-receptor type 5 OS=Mus musculus OX=10090 GN=Ptpn5 PE=1 SV=2	[R].TGCFIATSICCQQLR.[R]	3xCarbamidomethyl [C3; C10; C11]; 1xTMTpro [N-Term]	8.12314e-11	4.83621e-05	1	1	1	4	P54830 [479-493]	P54830 3xCarbamidomethyl [C481; C488; C489]	0	2119.04	0.95	0.46276	0.780497	3731.1	3926.7	5.24	7.87	3577	3891.9	3537.3	3896.7	3497.3	4140.2	4103.7	3757.3		High	High	High	High	High	High	High	High	High	High	2.13e-05	0.003019	5.521e-13	0.1312	91	3	100
Q9D0D3	Poly(A) RNA polymerase, mitochondrial OS=Mus musculus OX=10090 GN=Mtpap PE=1 SV=1	[K].LGCDLDMFLDLDETGK.[L]	1xCarbamidomethyl [C3]; 1xTMTpro [K16]; 1xTMTpro [N-Term]	1.96327e-06	4.83621e-05	1	1	1	1	Q9D0D3 [243-258]	Q9D0D3 1xCarbamidomethyl [C245]	0	2450.24	0.874	0.032188	0.288215	525.4	601	7.24	3.9	581	497.6	505.8	545.8	610.2	575.2	629.7	591.9		High	High	High	High	High	High	High	High	High	n/a	2.13e-05		2.969e-07		36		100
P68404; P20444	Protein kinase C beta type OS=Mus musculus OX=10090 GN=Prkcb PE=1 SV=4 Protein kinase C alpha type OS=Mus musculus OX=10090 GN=Prkca PE=1 SV=3	[R].LGCGPEGER.[D]	1xCarbamidomethyl [C3]; 1xTMTpro [N-Term]	3.85698e-05	4.83621e-05	2	2	1	2	P68404 [584-592]; P20444 [581-589]	P68404 1xCarbamidomethyl [C586]; P20444 1xCarbamidomethyl [C583]	0	1278.64	0.906	0.1411	0.499463	1448.8	1600	17.7	8.42	1405.9	1493.5	994.5	1493	1473.8	1558.1	1793.2	1642.9	Shared	High	High	High	High	High	High	High	High	High	n/a	2.13e-05		1.536e-05		28		100
Q9WUM5	Succinate--CoA ligase [ADP/GDP-forming] subunit alpha, mitochondrial OS=Mus musculus OX=10090 GN=Suclg1 PE=1 SV=4	[K].TGATASVIYVPPPFAAAAINEAIDAEIPLVVCITEGIPQQDMVR.[V]	1xCarbamidomethyl [C32]; 1xTMTpro [N-Term]	1.69648e-06	4.83621e-05	1	1	1	1	Q9WUM5 [111-154]	Q9WUM5 1xCarbamidomethyl [C142]	0	4912.58	0.886	0.200276	0.572003	130.2	146.9	3.4	12.48	130.2	132.6	122.5	130.2	138.3	121.1	160.3	156.1		High	High	High	High	High	High	High	High	High	n/a	2.13e-05		2.449e-07		41		100
Q61024	Asparagine synthetase [glutamine-hydrolyzing] OS=Mus musculus OX=10090 GN=Asns PE=1 SV=3	[R].IGCLLSGGLDSSLVAASLLK.[Q]	1xCarbamidomethyl [C3]; 1xTMTpro [K20]; 1xTMTpro [N-Term]	2.68882e-10	4.83621e-05	1	1	1	5	Q61024 [253-272]	Q61024 1xCarbamidomethyl [C255]	0	2582.51	0.916	0.00993266	0.188654	2552.7	2786	2.51	4.28	2570.1	2458.8	2608.6	2535.3	2765.7	2700.5	2982.3	2806.5		High	High	High	High	High	High	High	High	High	High	2.13e-05	0.002132	2.643e-12	0.1092	70	2.76	100
Q8C0Z1	Protein FAM234A OS=Mus musculus OX=10090 GN=Fam234a PE=1 SV=1	[R].TGAQYILLPCASALCGFSVK.[S]	2xCarbamidomethyl [C10; C15]; 1xTMTpro [K20]; 1xTMTpro [N-Term]	1.01975e-05	4.83621e-05	1	1	1	1	Q8C0Z1 [274-293]	Q8C0Z1 2xCarbamidomethyl [C283; C288]	0	2764.5	0.922	0.115509	0.458684	409.8	444.7	5.24	10.51	411.7	408	374.3	423.9	520.2	406.4	444.8	444.7		High	High	High	High	High	High	High	High	High	n/a	2.13e-05		2.571e-06		18		100
Q00558	40-kDa huntingtin-associated protein OS=Mus musculus OX=10090 GN=F8a1 PE=1 SV=2	[R].LGCPAAYGEPLQAAASALGAAVR.[L]	1xCarbamidomethyl [C3]; 1xTMTpro [N-Term]	3.85047e-10	4.83621e-05	1	1	1	1	Q00558 [108-130]	Q00558 1xCarbamidomethyl [C110]	0	2518.34	1.088	0.0344156	0.292954	465.7	427.9	3.97	4.27	444.8	487	457.5	474	410.8	425.5	455	430.2		High	High	High	High	High	High	High	High	High	n/a	2.13e-05		4.232e-12		79		100
P97494	Glutamate--cysteine ligase catalytic subunit OS=Mus musculus OX=10090 GN=Gclc PE=1 SV=4	[R].LGCPGFTLPEHRPNPEEGGASK.[S]	1xCarbamidomethyl [C3]; 1xTMTpro [K22]; 1xTMTpro [N-Term]	2.78319e-07	4.83621e-05	1	1	1	1	P97494 [150-171]	P97494 1xCarbamidomethyl [C152]	1	2958.54	0.865	0.167845	0.53097	563.4	651.1	12.31	3.95	587.9	528	686.5	539.9	619.6	635.6	667	673.6		High	High	High	High	High	High	High	High	High	n/a	2.13e-05		2.301e-08		45		100
Q80UJ7	Rab3 GTPase-activating protein catalytic subunit OS=Mus musculus OX=10090 GN=Rab3gap1 PE=1 SV=4	[K].IGCPLTPLPPVSIAIR.[L]	1xCarbamidomethyl [C3]; 1xTMTpro [N-Term]	4.20291e-07	4.83621e-05	1	1	1	3	Q80UJ7 [216-231]	Q80UJ7 1xCarbamidomethyl [C218]	0	2008.19	1.092	0.0165262	0.227014	2026.9	1856.6	4.29	2.68	2009.8	2113.5	2044.2	1905.4	1881.2	1778.4	1832.3	1882.5		High	High	High	High	High	High	High	High	High	Low	2.13e-05	0.06466	3.957e-08	0.4566	32	1.46	100
Q02956	Protein kinase C zeta type OS=Mus musculus OX=10090 GN=Prkcz PE=1 SV=2	[R].LGCRPQTGFSDIK.[S]	1xCarbamidomethyl [C3]; 1xTMTpro [K13]; 1xTMTpro [N-Term]	1.46302e-05	4.83621e-05	1	1	1	1	Q02956 [501-513]	Q02956 1xCarbamidomethyl [C503]	1	2087.16	0.769	0.0225596	0.253493	1262.3	1642.1	7.96	12.01	1293.4	1090.7	1302.8	1232	1299	1610.4	1716.7	1674.4		High	High	High	High	High	High	High	High	High	n/a	2.13e-05		4.145e-06		19		100
P59764	Dedicator of cytokinesis protein 4 OS=Mus musculus OX=10090 GN=Dock4 PE=1 SV=1	[K].IGCTVSLLNFYK.[T]	1xCarbamidomethyl [C3]; 1xTMTpro [K12]; 1xTMTpro [N-Term]	4.23949e-08	4.83621e-05	1	1	1	2	P59764 [1188-1199]	P59764 1xCarbamidomethyl [C1190]	0	2023.15	0.983	0.260694	0.630528	1257	1278.1	8.05	4.72	1270.7	1244.6	1067.8	1269.5	1234	1241	1316.3	1359.8		High	High	High	High	High	High	High	High	High	Low	2.13e-05	0.8329	1.97e-09	1	61	1.82	100
Q9CQ60	6-phosphogluconolactonase OS=Mus musculus OX=10090 GN=Pgls PE=1 SV=1	[R].TGALCWFLDEAAAR.[L]	1xCarbamidomethyl [C5]; 1xTMTpro [N-Term]	1.07745e-08	4.83621e-05	1	1	1	7	Q9CQ60 [232-245]	Q9CQ60 1xCarbamidomethyl [C236]	0	1884.96	1.093	0.0958267	0.429102	3036	2777.3	8.48	5.44	2956.1	3053.6	3536.3	3018.6	2735.9	3069.9	2774.9	2779.6		High	High	High	High	High	High	High	High	High	Low	2.13e-05	0.5035	3.29e-10	0.9184	44	1.07	100
P80318	T-complex protein 1 subunit gamma OS=Mus musculus OX=10090 GN=Cct3 PE=1 SV=1	[K].IGDEYFTFITDCK.[D]	1xCarbamidomethyl [C12]; 1xTMTpro [K13]; 1xTMTpro [N-Term]	1.57402e-08	4.83621e-05	1	1	1	4	P80318 [355-367]	P80318 1xCarbamidomethyl [C366]	0	2217.14	0.908	0.518698	0.812613	4643.2	5113.3	14.09	4.88	4868.1	4176	5716.2	4428.8	4661.7	5068.9	5158.1	5195.1		High	High	High	High	High	High	High	High	High	n/a	2.13e-05		5.376e-10		73		100
Q9JLM8	Serine/threonine-protein kinase DCLK1 OS=Mus musculus OX=10090 GN=Dclk1 PE=1 SV=1	[K].LGDFGLATIVDGPLYTVCGTPTYVAPEIIAETGYGLK.[V]	1xCarbamidomethyl [C18]; 1xTMTpro [K37]; 1xTMTpro [N-Term]	9.26251e-10	4.83621e-05	1	1	1	1	Q9JLM8 [547-583]	Q9JLM8 1xCarbamidomethyl [C564]	0	4480.39	0.87	0.141732	0.500115	480.9	552.9	3.48	12.14	502.1	477.3	461.7	484.5	460.8	542.1	621.1	564		High	High	High	High	High	High	High	High	High	n/a	2.13e-05		1.336e-11		95		100
Q62074	Protein kinase C iota type OS=Mus musculus OX=10090 GN=Prkci PE=1 SV=3	[R].LGCHPQTGFADIQGHPFFR.[N]	1xCarbamidomethyl [C3]; 1xTMTpro [N-Term]	1.97679e-09	4.83621e-05	1	1	1	1	Q62074 [504-522]	Q62074 1xCarbamidomethyl [C506]	0	2489.25	0.944	0.309363	0.675465	362.6	384.2	17.42	5.93	349.5	376.3	256.4	388.2	352	393.5	403.3	375.2		High	High	High	High	High	High	High	High	High	n/a	2.13e-05		3.588e-11		61		100
Q3TJ22	Angio-associated migratory protein OS=Mus musculus OX=10090 GN=Aamp PE=1 SV=1	[R].LGDGELLFECAGHK.[D]	1xCarbamidomethyl [C10]; 1xTMTpro [K14]; 1xTMTpro [N-Term]	2.9306e-05	4.83621e-05	1	1	1	1	Q3TJ22 [122-135]	Q3TJ22 1xCarbamidomethyl [C131]	0	2154.15	1.072	0.0249139	0.262298	708.1	660.8	2.21	3.19	686.9	717.3	719.8	699.1	690.7	647.9	647.3	674		High	High	High	High	High	High	High	High	n/a	High		0.0003185		1.26e-05		4.8	100
Q8BHL7	CDC42 small effector protein 1 OS=Mus musculus OX=10090 GN=Cdc42se1 PE=1 SV=1	[K].LGCCVVEKPQPK.[K]	2xCarbamidomethyl [C3; C4]; 2xTMTpro [K8; K12]; 1xTMTpro [N-Term]	8.48036e-06	4.83621e-05	1	1	1	1	Q8BHL7 [8-19]	Q8BHL7 2xCarbamidomethyl [C10; C11]	0	2327.34	0.941	0.0675645	0.377273	866.1	920.2	6.76	3.51	900.3	881.4	769.9	851.2	910.4	911	980	929.5		High	High	High	High	High	High	High	High	n/a	High		0.0003185		0.009165		3.03	100
Q9DC23	DnaJ homolog subfamily C member 10 OS=Mus musculus OX=10090 GN=Dnajc10 PE=1 SV=2	[R].IGAVNCGDDR.[M]	1xCarbamidomethyl [C6]; 1xTMTpro [N-Term]	6.86632e-06	4.83621e-05	1	1	1	1	Q9DC23 [181-190]	Q9DC23 1xCarbamidomethyl [C186]	0	1380.69	0.938	0.189725	0.560267	788.2	840.2	9.77	6.38	793.5	858.8	675.4	783	920.5	824.5	856.2	793.9		High	High	High	High	High	High	High	High	High	Low	2.13e-05	0.9647	1.53e-06	1	36	0.42	100
Q99N93	39S ribosomal protein L16, mitochondrial OS=Mus musculus OX=10090 GN=Mrpl16 PE=1 SV=1	[K].TGCLVVEMGGR.[C]	1xCarbamidomethyl [C3]; 1xTMTpro [N-Term]	2.00276e-06	4.83621e-05	1	1	1	1	Q99N93 [156-166]	Q99N93 1xCarbamidomethyl [C158]	0	1482.77	1.133	0.0604377	0.362418	531.4	469	7.18	4.24	504.4	560.6	487.1	559.8	506	470.5	467.4	461.3		High	High	High	High	High	High	High	High	High	n/a	2.13e-05		3.056e-07		18		100
Q6QI06	Rapamycin-insensitive companion of mTOR OS=Mus musculus OX=10090 GN=Rictor PE=1 SV=2	[K].TGCHLLEVQSIITELCHNVR.[T]	2xCarbamidomethyl [C3; C16]; 1xTMTpro [N-Term]	2.59183e-08	4.83621e-05	1	1	1	1	Q6QI06 [891-910]	Q6QI06 2xCarbamidomethyl [C893; C906]	0	2683.4	1.064	0.405204	0.745053	346.1	325.2	6.52	8.57	326.4	377.8	336.3	356.3	374.4	327.9	322.5	308.6		High	High	High	High	High	High	High	High	High	n/a	2.13e-05		1.037e-09		58		100
Q8R2H9	Phosphoethanolamine/phosphocholine phosphatase OS=Mus musculus OX=10090 GN=Phospho1 PE=1 SV=1	[R].LFYVGDGANDFCPMGLLAGGDVAFPR.[R]	1xCarbamidomethyl [C12]; 1xTMTpro [N-Term]	3.69986e-10	4.83621e-05	1	1	1	1	Q8R2H9 [198-223]	Q8R2H9 1xCarbamidomethyl [C209]	0	3063.5	0.879	0.00567158	0.159101	380.5	433	4.31	3.05	375.5	404.6	366	385.6	442.3	411.7	430.8	435.2		High	High	High	High	High	High	High	High	High	n/a	2.13e-05		4.027e-12		59		100
Q9D0L4	AarF domain-containing protein kinase 1 OS=Mus musculus OX=10090 GN=Adck1 PE=1 SV=1	[R].LGAADLYPLFACMLTAR.[S]	1xCarbamidomethyl [C12]; 1xTMTpro [N-Term]	1.10107e-09	4.83621e-05	1	1	1	2	Q9D0L4 [368-384]	Q9D0L4 1xCarbamidomethyl [C379]	0	2187.16	1.046	0.530855	0.819825	2006.9	1918.8	7.5	5.23	1913.2	2105.2	1857.5	2173.3	2094.4	1892.2	1945.9	1866.4		High	High	High	High	High	High	High	High	High	n/a	2.13e-05		1.675e-11		52		100
Q69Z89	Ras-associating and dilute domain-containing protein OS=Mus musculus OX=10090 GN=Radil PE=1 SV=2	[R].LGAAPQSCR.[M]	1xCarbamidomethyl [C8]; 1xTMTpro [N-Term]	5.38071e-05	4.83621e-05	1	1	1	1	Q69Z89 [401-409]	Q69Z89 1xCarbamidomethyl [C408]	0	1263.68	1.087	0.43591	0.764015	372.7	342.9	8.16	18.19	351.9	422.5	363	382.6	431.5	376.3	312.4	289.9		High	High	High	High	High	High	High	High	High	n/a	0.0009467		0.02933		19		100
Q0VG49	Uncharacterized protein C15orf61 homolog OS=Mus musculus OX=10090 PE=2 SV=2	[R].TGCFPFIK.[Y]	1xCarbamidomethyl [C3]; 1xTMTpro [K8]; 1xTMTpro [N-Term]	0.000113147	4.83621e-05	1	1	1	1	Q0VG49 [82-89]	Q0VG49 1xCarbamidomethyl [C84]	0	1577.9	1.004	0.852083	0.954257	1191.1	1186	15.22	15.79	1219.6	1134.2	1551.5	1163.2	1518.4	1242.2	1077.6	1132.4		High	High	High	High	High	High	High	High	High	n/a	2.13e-05		7.193e-05		36		100
Q8VDK1	Deaminated glutathione amidase OS=Mus musculus OX=10090 GN=Nit1 PE=1 SV=2	[R].LGACLAFLPEAFDFIAR.[N]	1xCarbamidomethyl [C4]; 1xTMTpro [N-Term]	5.64279e-08	4.83621e-05	1	1	1	2	Q8VDK1 [73-89]	Q8VDK1 1xCarbamidomethyl [C76]	0	2215.19	1.036	0.8405	0.95041	1208.4	1166.8	15.18	6.12	1251.2	1167.1	1457.6	1012.6	1182.7	1151	1137.4	1298		High	High	High	High	High	High	High	High	High	n/a	2.13e-05		2.862e-09		50		100
O88507	Ciliary neurotrophic factor receptor subunit alpha OS=Mus musculus OX=10090 GN=Cntfr PE=1 SV=2	[R].LGADVTLPCGTASWDAAVTWR.[V]	1xCarbamidomethyl [C9]; 1xTMTpro [N-Term]	2.31044e-07	4.83621e-05	1	1	1	6	O88507 [38-58]	O88507 1xCarbamidomethyl [C46]	0	2551.29	1.031	0.497554	0.800451	1399.8	1357.6	7.35	4.29	1398.3	1562	1312.2	1401.3	1384.4	1326.4	1452.9	1331.2		High	High	High	High	High	High	High	High	High	n/a	2.13e-05		1.802e-08		31		100
Q8BH55	Threonine synthase-like 1 OS=Mus musculus OX=10090 GN=Thnsl1 PE=1 SV=1	[K].LGCCVIDVDSDVLEK.[A]	2xCarbamidomethyl [C3; C4]; 1xTMTpro [K15]; 1xTMTpro [N-Term]	2.29513e-07	4.83621e-05	1	1	1	1	Q8BH55 [79-93]	Q8BH55 2xCarbamidomethyl [C81; C82]	0	2330.22	1.007	0.489911	0.795488	352.5	350.2	8.5	3.21	408.3	353.8	338.9	351.2	363.9	336.8	347.7	352.7		High	High	High	High	High	High	High	High	High	n/a	2.13e-05		1.794e-08		61		100
Q9QUI0	Transforming protein RhoA OS=Mus musculus OX=10090 GN=Rhoa PE=1 SV=1	[R].IGAFGYMECSAK.[T]	1xCarbamidomethyl [C9]; 1xTMTpro [K12]; 1xTMTpro [N-Term]	3.56638e-08	4.83621e-05	1	1	1	16	Q9QUI0 [151-162]	Q9QUI0 1xCarbamidomethyl [C159]	0	1942.01	0.891	0.15358	0.514281	11942.7	13405	6	7.84	12413.7	11221.8	12715.7	11489.5	11511.3	13498.5	13312.1	13750.6		High	High	High	High	High	High	High	High	High	High	2.13e-05	0.0005594	1.564e-09	0.03522	67	2.9	100
Q14BI2	Metabotropic glutamate receptor 2 OS=Mus musculus OX=10090 GN=Grm2 PE=1 SV=2	[R].LGAHILDSCSK.[D]	1xCarbamidomethyl [C9]; 1xTMTpro [K11]; 1xTMTpro [N-Term]	4.37951e-06	4.83621e-05	1	1	1	3	Q14BI2 [84-94]	Q14BI2 1xCarbamidomethyl [C92]	0	1809.02	0.839	0.0722181	0.385465	1793.2	2136.3	3.75	12.8	1822.4	1723.7	1764.4	1878	2046.1	1825.8	2230.5	2472.1		High	High	High	High	High	High	High	High	High	n/a	2.13e-05		8.521e-07		49		100
A2A8L5; B0V2N1; Q64487	Receptor-type tyrosine-protein phosphatase F OS=Mus musculus OX=10090 GN=Ptprf PE=1 SV=1 Receptor-type tyrosine-protein phosphatase S OS=Mus musculus OX=10090 GN=Ptprs PE=1 SV=1 Receptor-type tyrosine-protein phosphatase delta OS=Mus musculus OX=10090 GN=Ptprd PE=1 SV=3	[R].TGCFIVIDAMLER.[MI]	1xCarbamidomethyl [C3]; 1xTMTpro [N-Term]	4.37951e-06	4.83621e-05	3	3	1	3	A2A8L5 [1546-1558]; B0V2N1 [1555-1567]; Q64487 [1560-1572]	A2A8L5 1xCarbamidomethyl [C1548]; B0V2N1 1xCarbamidomethyl [C1557]; Q64487 1xCarbamidomethyl [C1562]	0	1828.96	1.099	0.00988241	0.188654	584.5	531.8	3.81	3.58	556.8	595.2	606.8	574	503	532.1	531.5	548.6	Shared	High	High	High	High	High	High	High	High	High	n/a	2.13e-05		4.126e-06		64		100
Q6ZWR6	Nesprin-1 OS=Mus musculus OX=10090 GN=Syne1 PE=1 SV=2	[R].LGALEQALCK.[Q]	1xCarbamidomethyl [C9]; 1xTMTpro [K10]; 1xTMTpro [N-Term]	3.99171e-06	4.83621e-05	1	1	1	2	Q6ZWR6 [7336-7345]	Q6ZWR6 1xCarbamidomethyl [C7344]	0	1711.01	0.948	0.210173	0.581075	1527.4	1610.7	5.68	2.75	1683.9	1513.9	1484.6	1541	1594.1	1691.6	1600.2	1621.2		High	High	High	High	High	High	High	High	High	Low	2.13e-05	0.9623	7.534e-07	1	38	1.52	100
P46460	Vesicle-fusing ATPase OS=Mus musculus OX=10090 GN=Nsf PE=1 SV=2	[R].LGANSGLHIIIFDEIDAICK.[Q]	1xCarbamidomethyl [C19]; 1xTMTpro [K20]; 1xTMTpro [N-Term]	2.38135e-09	4.83621e-05	1	1	1	59	P46460 [316-335]	P46460 1xCarbamidomethyl [C334]	0	2807.56	0.99	0.593055	0.851212	20076.6	20279.4	5.3	5.82	20548.8	20208.3	18204.1	19945.8	18760.4	19719.8	21385.1	20855		High	High	High	High	High	High	High	High	High	n/a	2.13e-05		4.577e-11		56		100
Q9EQ06	Estradiol 17-beta-dehydrogenase 11 OS=Mus musculus OX=10090 GN=Hsd17b11 PE=1 SV=1	[K].LGAQAHPFVVDCSQR.[E]	1xCarbamidomethyl [C12]; 1xTMTpro [N-Term]	4.43248e-07	4.83621e-05	1	1	1	1	Q9EQ06 [83-97]	Q9EQ06 1xCarbamidomethyl [C94]	0	1989.03	1.033	0.947079	0.985424	1174.9	1137.8	13.68	5.39	1270.8	1198.9	912.9	1151.4	1152.3	1034.2	1123.4	1170.2		High	High	High	High	High	High	High	High	High	n/a	2.13e-05		4.248e-08		23		100
Q9EQ06	Estradiol 17-beta-dehydrogenase 11 OS=Mus musculus OX=10090 GN=Hsd17b11 PE=1 SV=1	[K].LGAQAHPFVVDCSQREEIYSAAK.[K]	1xCarbamidomethyl [C12]; 1xTMTpro [K23]; 1xTMTpro [N-Term]	6.20431e-09	4.83621e-05	1	1	1	1	Q9EQ06 [83-105]	Q9EQ06 1xCarbamidomethyl [C94]	1	3184.67	1.173	0.00581092	0.159301	893.1	761.4	7.64	4.55	1026.6	899.5	886.8	875.3	779.3	709.9	743.9	783.1		High	High	High	High	High	High	High	High	High	n/a	2.13e-05		1.6e-10		26		100
Q9Z2C4	Myotubularin-related protein 1 OS=Mus musculus OX=10090 GN=Mtmr1 PE=1 SV=1	[K].IGAQSHGDNSCGIEIVCK.[D]	2xCarbamidomethyl [C11; C17]; 1xTMTpro [K18]; 1xTMTpro [N-Term]	9.11118e-12	4.83621e-05	1	1	1	1	Q9Z2C4 [164-181]	Q9Z2C4 2xCarbamidomethyl [C174; C180]	0	2553.3	0.824	0.113018	0.456008	1004	1218.4	9.92	10.33	1034.5	936	1168.8	974.5	1000.1	1220.2	1216.6	1275.7		High	High	High	High	High	High	High	High	High	n/a	2.13e-05		3.163e-14		55		100
Q6PNC0	DmX-like protein 1 OS=Mus musculus OX=10090 GN=Dmxl1 PE=1 SV=1	[K].TFYPFAGHDLAELPVSSPLCHAVLK.[T]	1xCarbamidomethyl [C20]; 1xTMTpro [K25]; 1xTMTpro [N-Term]	1.37126e-09	4.83621e-05	1	1	1	1	Q6PNC0 [2490-2514]	Q6PNC0 1xCarbamidomethyl [C2509]	0	3377.82	0.811	0.00577978	0.159301	736.9	908.6	6	5.76	795.7	709.5	765.3	703.3	810.5	911.9	905.2	919.1		High	High	High	High	High	High	High	High	High	n/a	2.13e-05		2.217e-11		71		100
P70404	Isocitrate dehydrogenase [NAD] subunit gamma 1, mitochondrial OS=Mus musculus OX=10090 GN=Idh3g PE=1 SV=1	[K].LGDGLFLQCCR.[E]	2xCarbamidomethyl [C9; C10]; 1xTMTpro [N-Term]	3.59645e-05	4.83621e-05	1	1	1	2	P70404 [227-237]	P70404 2xCarbamidomethyl [C235; C236]	0	1642.84	1.089	0.445634	0.769282	970.6	891.6	12.38	11.68	917.2	1136.3	861	1027.1	1073.4	891.2	892.1	822.6		High	High	High	High	High	High	High	High	High	n/a	2.13e-05		1.427e-05		35		100
Q8JZN7	Mitochondrial Rho GTPase 2 OS=Mus musculus OX=10090 GN=Rhot2 PE=1 SV=1	[K].TFVHCATIYKR.[Y]	1xCarbamidomethyl [C5]; 1xTMTpro [K10]; 1xTMTpro [N-Term]	6.71388e-05	4.83621e-05	1	1	1	1	Q8JZN7 [502-512]	Q8JZN7 1xCarbamidomethyl [C506]	1	2004.13	0.922	0.137885	0.494811	429	465.2	6.7	8.2	421	383.6	437.3	448.5	503.5	486.5	420.3	444.9		High	High	High	High	High	High	High	High	High	n/a	2.13e-05		3.316e-05		18		100
Q8JZN7	Mitochondrial Rho GTPase 2 OS=Mus musculus OX=10090 GN=Rhot2 PE=1 SV=1	[K].TFVHCATIYK.[R]	1xCarbamidomethyl [C5]; 1xTMTpro [K10]; 1xTMTpro [N-Term]	5.85945e-06	4.83621e-05	1	1	1	1	Q8JZN7 [502-511]	Q8JZN7 1xCarbamidomethyl [C506]	0	1848.03	1.008	0.979127	0.994445	723.6	717.8	5.3	4.36	705.5	674.2	742.1	759.6	761.3	725.1	686.2	710.5		High	High	High	High	High	High	High	High	High	n/a	2.13e-05		1.239e-06		46		100
Q6P9R2; Q9Z1W9	Serine/threonine-protein kinase OSR1 OS=Mus musculus OX=10090 GN=Oxsr1 PE=1 SV=1 STE20/SPS1-related proline-alanine-rich protein kinase OS=Mus musculus OX=10090 GN=Stk39 PE=1 SV=1	[K].TFVGTPCWMAPEVMEQVR.[G]	1xCarbamidomethyl [C7]; 1xTMTpro [N-Term]	5.13048e-07	4.83621e-05	2	2	1	2	Q6P9R2 [185-202]; Q9Z1W9 [243-260]	Q6P9R2 1xCarbamidomethyl [C191]; Q9Z1W9 1xCarbamidomethyl [C249]	0	2442.19	0.906	0.0840943	0.410528	1833.7	2023.7	12.3	8.91	1898.6	1823.6	1429.9	1843.8	2318.1	1881.8	2036.2	2011.3	Shared	High	High	High	High	High	High	High	High	High	n/a	2.13e-05		5.136e-08		60		100
Q99LC5	Electron transfer flavoprotein subunit alpha, mitochondrial OS=Mus musculus OX=10090 GN=Etfa PE=1 SV=2	[R].LGGEVSCLVAGTK.[C]	1xCarbamidomethyl [C7]; 1xTMTpro [K13]; 1xTMTpro [N-Term]	7.83019e-09	4.83621e-05	1	1	1	3	Q99LC5 [47-59]	Q99LC5 1xCarbamidomethyl [C53]	0	1899.09	1.082	0.0129284	0.209477	2125.8	1964.1	2.99	3.53	2164.9	2087.4	2169.1	2038.5	1856.2	1935.3	1993.2	2007.7		High	High	High	High	High	High	High	High	High	n/a	2.13e-05		2.16e-10		65		100
Q99LC5	Electron transfer flavoprotein subunit alpha, mitochondrial OS=Mus musculus OX=10090 GN=Etfa PE=1 SV=2	[R].LGGEVSCLVAGTKCDK.[V]	2xCarbamidomethyl [C7; C14]; 2xTMTpro [K13; K16]; 1xTMTpro [N-Term]	2.63113e-09	4.83621e-05	1	1	1	2	Q99LC5 [47-62]	Q99LC5 2xCarbamidomethyl [C53; C60]	1	2606.45	0.991	0.993281	0.998318	2955.9	2982.1	21.41	15.69	3455.7	2275.5	3497.6	2528.4	2358	2716.9	3273.2	3300.5		High	High	High	High	High	High	High	High	High	n/a	2.13e-05		5.19e-11		35		100
B9EJ80	PDZ domain-containing protein 8 OS=Mus musculus OX=10090 GN=Pdzd8 PE=1 SV=1	[K].LGGLICLGHVSLK.[L]	1xCarbamidomethyl [C6]; 1xTMTpro [K13]; 1xTMTpro [N-Term]	5.60539e-08	4.83621e-05	1	1	1	1	B9EJ80 [716-728]	B9EJ80 1xCarbamidomethyl [C721]	0	1975.2	1.002	0.568432	0.839506	545.7	544.6	20.95	7.54	514.8	522	780.9	570.4	608.2	558.1	512.1	531.4		High	High	High	High	High	High	High	High	High	n/a	2.13e-05		2.842e-09		55		100
Q9DBQ7	Protein-associating with the carboxyl-terminal domain of ezrin OS=Mus musculus OX=10090 GN=Scyl3 PE=1 SV=3	[K].LGGMETVCQVPQATPEFLR.[N]	1xCarbamidomethyl [C8]; 1xTMTpro [N-Term]	2.62896e-06	4.83621e-05	1	1	1	1	Q9DBQ7 [140-158]	Q9DBQ7 1xCarbamidomethyl [C147]	0	2437.25	1.028	0.493645	0.798435	432.7	420.8	4.11	3.63	413.3	452	422.8	442.9	445.7	418.6	422.9	409.4		High	High	High	High	High	High	High	High	High	n/a	2.13e-05		4.33e-07		35		100
P58404	Striatin-4 OS=Mus musculus OX=10090 GN=Strn4 PE=1 SV=2	[R].LGGSVLEQIPFLQNCEDEDSDEDDELDSVQHK.[K]	1xCarbamidomethyl [C15]; 1xTMTpro [K32]; 1xTMTpro [N-Term]	1.13075e-09	4.83621e-05	1	1	1	1	P58404 [257-288]	P58404 1xCarbamidomethyl [C271]	0	4269.03	0.888	0.274456	0.644019	231	260.2	8.61	13.14	241.8	219.3	262.3	220.6	226.9	235.9	293.6	286.9		High	High	High	High	High	High	High	High	High	n/a	2.13e-05		1.721e-11		41		100
P80315	T-complex protein 1 subunit delta OS=Mus musculus OX=10090 GN=Cct4 PE=1 SV=3	[K].LGGTIDDCELVEGLVLTQK.[V]	1xCarbamidomethyl [C8]; 1xTMTpro [K19]; 1xTMTpro [N-Term]	1.78036e-10	4.83621e-05	1	1	1	11	P80315 [214-232]	P80315 1xCarbamidomethyl [C221]	0	2668.47	0.861	0.1849	0.554147	5897.4	6847.2	10.85	8.03	6205.2	5532.3	6953.1	5604.8	5948.8	6925.5	6769.8	7202.4		High	High	High	High	High	High	High	High	High	n/a	2.13e-05		1.544e-12		87		100
Q6PCX7	Repulsive guidance molecule A OS=Mus musculus OX=10090 GN=Rgma PE=1 SV=1	[R].TFTDHFQTCK.[V]	1xCarbamidomethyl [C9]; 1xTMTpro [K10]; 1xTMTpro [N-Term]	1.24193e-05	4.83621e-05	1	1	1	1	Q6PCX7 [174-183]	Q6PCX7 1xCarbamidomethyl [C182]	0	1892.98	0.913	0.166828	0.529861	935.9	1024.6	8.53	6.37	1041.5	908.3	853.6	964.3	943.4	1016.9	1102.3	1032.3		High	High	High	High	High	High	High	High	High	n/a	2.13e-05		3.354e-06		41		100
O89050	Muskelin OS=Mus musculus OX=10090 GN=Mkln1 PE=1 SV=1	[R].IGHCMLFHSK.[N]	1xCarbamidomethyl [C4]; 1xTMTpro [K10]; 1xTMTpro [N-Term]	1.53157e-05	4.83621e-05	1	1	1	1	O89050 [457-466]	O89050 1xCarbamidomethyl [C460]	0	1838.01	1.049	0.890851	0.970202	121.6	116	11.59	6.04	136.1	123.6	102.3	119.7	113.8	116.7	115.3	129.4		High	High	High	High	High	High	High	High	High	n/a	2.13e-05		4.432e-06		22		100
P63087; P62137; P62141	Serine/threonine-protein phosphatase PP1-gamma catalytic subunit OS=Mus musculus OX=10090 GN=Ppp1cc PE=1 SV=1 Serine/threonine-protein phosphatase PP1-alpha catalytic subunit OS=Mus musculus OX=10090 GN=Ppp1ca PE=1 SV=1 Serine/threonine-protein phosphatase PP1-beta catalytic subunit OS=Mus musculus OX=10090 GN=Ppp1cb PE=1 SV=3	[K].TFTDCFNCLPIAAIVDEK.[I]	2xCarbamidomethyl [C5; C8]; 1xTMTpro [K18]; 1xTMTpro [N-Term]	3.8183e-09	4.83621e-05	3	3	1	3	P63087 [151-168]; P62137 [151-168]; P62141 [150-167]	P63087 2xCarbamidomethyl [C155; C158]; P62137 2xCarbamidomethyl [C155; C158]; P62141 2xCarbamidomethyl [C154; C157]	0	2722.41	0.969	0.680412	0.890637	2922.5	3016.8	24.31	14.6	3171.2	2594	4283.9	2693.3	2390.3	3067.9	2966.5	3435.4	Shared	High	High	High	High	High	High	High	High	High	n/a	2.13e-05		8.484e-11		105		100
P57780; Q9JI91; Q7TPR4	Alpha-actinin-4 OS=Mus musculus OX=10090 GN=Actn4 PE=1 SV=1 Alpha-actinin-2 OS=Mus musculus OX=10090 GN=Actn2 PE=1 SV=2 Alpha-actinin-1 OS=Mus musculus OX=10090 GN=Actn1 PE=1 SV=1	[K].TFTAWCNSHLRK.[A]	1xCarbamidomethyl [C6]; 1xTMTpro [K12]; 1xTMTpro [N-Term]	3.26807e-05	4.83621e-05	3	4	1	1	P57780 [56-67]; Q9JI91 [43-54]; Q7TPR4 [36-47]	P57780 1xCarbamidomethyl [C61]; Q9JI91 1xCarbamidomethyl [C48]; Q7TPR4 1xCarbamidomethyl [C41]	1	2129.16	0.87	0.497633	0.800451	545.4	627.1	14.37	22.1	598.6	514.2	429.5	578.5	417.6	574.2	704.4	684.8	Shared	High	High	High	High	High	High	High	High	High	n/a	2.13e-05		4.751e-05		18		100
P57780; Q9JI91; Q7TPR4	Alpha-actinin-4 OS=Mus musculus OX=10090 GN=Actn4 PE=1 SV=1 Alpha-actinin-2 OS=Mus musculus OX=10090 GN=Actn2 PE=1 SV=2 Alpha-actinin-1 OS=Mus musculus OX=10090 GN=Actn1 PE=1 SV=1	[K].TFTAWCNSHLR.[K]	1xCarbamidomethyl [C6]; 1xTMTpro [N-Term]	2.63903e-07	4.83621e-05	3	4	1	4	P57780 [56-66]; Q9JI91 [43-53]; Q7TPR4 [36-46]	P57780 1xCarbamidomethyl [C61]; Q9JI91 1xCarbamidomethyl [C48]; Q7TPR4 1xCarbamidomethyl [C41]	0	1696.85	1.034	0.906584	0.975636	2501.6	2418.7	11.4	6.64	2450	2630.2	2014.9	2554.3	2161.5	2404.6	2534.8	2432.8	Shared	High	High	High	High	High	High	High	High	High	Low	2.13e-05	0.8532	2.155e-08	1	46	1.47	100
Q3UUJ4	STE20-related kinase adapter protein alpha OS=Mus musculus OX=10090 GN=Strada PE=1 SV=1	[R].TFSPHFHNFVEQCLQR.[N]	1xCarbamidomethyl [C13]; 1xTMTpro [N-Term]	1.25324e-07	4.83621e-05	1	1	1	2	Q3UUJ4 [347-362]	Q3UUJ4 1xCarbamidomethyl [C359]	0	2351.17	1.011	0.940716	0.983579	1163.7	1151	11.67	3.53	1122.1	1318	997.2	1206.9	1185.1	1184.9	1111.6	1118.1		High	High	High	High	High	High	High	High	High	n/a	2.13e-05		8.14e-09		48		100
Q03146	Epithelial discoidin domain-containing receptor 1 OS=Mus musculus OX=10090 GN=Ddr1 PE=2 SV=2	[R].TFQTMQVHCNNMHTLGAR.[L]	1xCarbamidomethyl [C9]; 1xTMTpro [N-Term]	6.75253e-08	4.83621e-05	1	1	1	1	Q03146 [281-298]	Q03146 1xCarbamidomethyl [C289]	0	2450.18	1.101	0.349713	0.706717	309.3	281	4.26	9.66	308.5	324.5	292.3	310	335.9	281.8	276.1	280.2		High	High	High	High	High	High	High	High	High	n/a	2.13e-05		3.608e-09		70		100
Q8BH95	Enoyl-CoA hydratase, mitochondrial OS=Mus musculus OX=10090 GN=Echs1 PE=1 SV=1	[R].TFQDCYSSK.[F]	1xCarbamidomethyl [C5]; 1xTMTpro [K9]; 1xTMTpro [N-Term]	1.7914e-05	4.83621e-05	1	1	1	3	Q8BH95 [107-115]	Q8BH95 1xCarbamidomethyl [C111]	0	1743.89	0.798	0.0298547	0.280426	2278.3	2856.3	12.79	6.79	2526.6	2011	2548.9	2054.4	2951.6	3067.2	2631.1	2764		High	High	High	High	High	High	High	High	High	n/a	2.13e-05		5.435e-06		42		100
O70133	ATP-dependent RNA helicase A OS=Mus musculus OX=10090 GN=Dhx9 PE=1 SV=2	[R].TFPVQEYFLEDCIQMTQFIPPPK.[D]	1xCarbamidomethyl [C12]; 1xTMTpro [K23]; 1xTMTpro [N-Term]	1.73592e-07	4.83621e-05	1	1	1	2	O70133 [569-591]	O70133 1xCarbamidomethyl [C580]	0	3436.78	1.004	0.715426	0.904009	1298.9	1293.9	3.63	2.16	1288.5	1224.7	1309.3	1334.1	1338.4	1293.1	1271.4	1294.6		High	High	High	High	High	High	High	High	High	n/a	2.13e-05		1.243e-08		43		100
Q69ZF3	Non-lysosomal glucosylceramidase OS=Mus musculus OX=10090 GN=Gba2 PE=1 SV=2	[R].LGLAFQTPEAYCQQQVFR.[S]	1xCarbamidomethyl [C12]; 1xTMTpro [N-Term]	1.93077e-07	4.83621e-05	1	1	1	3	Q69ZF3 [847-864]	Q69ZF3 1xCarbamidomethyl [C858]	0	2460.27	1.518	0.00110117	0.101501	3509.3	2312.3	4.61	9.4	3257	3542	3633.7	3476.9	2604.3	2461.3	2156.2	2172.3		High	High	High	High	High	High	High	High	High	n/a	2.13e-05		1.425e-08		48		100
Q5SUR0	Phosphoribosylformylglycinamidine synthase OS=Mus musculus OX=10090 GN=Pfas PE=1 SV=1	[R].LGGTALAQCFSQLGEHPPDLDLPENLVR.[A]	1xCarbamidomethyl [C9]; 1xTMTpro [N-Term]	6.59844e-10	4.83621e-05	1	1	1	3	Q5SUR0 [862-889]	Q5SUR0 1xCarbamidomethyl [C870]	0	3351.73	0.986	0.72169	0.9064	2278.2	2310.9	10.83	5.56	2287.2	2263.4	2793.4	2269.2	2323.9	2528.6	2224.3	2298.1		High	High	High	High	High	High	High	High	High	n/a	2.13e-05		8.566e-12		52		100
P62880	Guanine nucleotide-binding protein G(I)/G(S)/G(T) subunit beta-2 OS=Mus musculus OX=10090 GN=Gnb2 PE=1 SV=3	[R].TFVSGACDASIK.[L]	1xCarbamidomethyl [C7]; 1xTMTpro [K12]; 1xTMTpro [N-Term]	3.02016e-08	4.83621e-05	1	1	1	3	P62880 [198-209]	P62880 1xCarbamidomethyl [C204]	0	1864.01	1.02	0.23537	0.606153	2215.9	2171.9	4.05	2.38	2223.6	2160.1	2370.7	2208.2	2116.1	2137.3	2221.3	2207		High	High	High	High	High	High	High	High	High	n/a	2.13e-05		1.262e-09		79		100
P46096	Synaptotagmin-1 OS=Mus musculus OX=10090 GN=Syt1 PE=1 SV=1	[K].LGDICFSLR.[Y]	1xCarbamidomethyl [C5]; 1xTMTpro [N-Term]	6.3942e-05	4.83621e-05	1	2	1	7	P46096 [273-281]	P46096 1xCarbamidomethyl [C277]	0	1384.76	1.06	0.361439	0.714931	6853	6462.8	9.5	17.96	6739.6	6968.3	5801.8	7278.5	4468	6201.4	6735.2	6788		High	High	High	High	High	High	High	High	High	n/a	2.13e-05		3.092e-05		35		100
Q08274	Dystrophia myotonica WD repeat-containing protein OS=Mus musculus OX=10090 GN=Dmwd PE=1 SV=3	[R].LGDPDGAGEPPSTPSGLGAGGDRVCFNLGR.[E]	1xCarbamidomethyl [C25]; 1xTMTpro [N-Term]	1.6028e-07	4.83621e-05	1	1	1	1	Q08274 [100-129]	Q08274 1xCarbamidomethyl [C124]	1	3230.58	0.932	0.93318	0.982007	903.6	969.1	5.06	15.55	882.2	925.5	975.4	875.1	705.2	964.1	1019.5	974		High	High	High	High	High	High	High	High	High	n/a	2.13e-05		1.118e-08		33		100
Q920P5	Adenylate kinase isoenzyme 5 OS=Mus musculus OX=10090 GN=Ak5 PE=1 SV=2	[R].IGDPHLVICMDCSADTMTNR.[L]	2xCarbamidomethyl [C9; C12]; 1xTMTpro [N-Term]	1.86764e-07	4.83621e-05	1	1	1	2	Q920P5 [477-496]	Q920P5 2xCarbamidomethyl [C485; C488]	0	2610.21	1.071	0.669781	0.884815	1552.7	1450	11.42	6.64	1491.5	1675.8	1284.2	1616.5	1577.2	1383.5	1517.9	1385.2		High	High	High	High	High	High	High	High	High	n/a	2.13e-05		1.363e-08		40		100
Q68EF0	Rab-3A-interacting protein OS=Mus musculus OX=10090 GN=Rab3ip PE=1 SV=1	[R].LGDSSCCYYISPFCR.[Y]	3xCarbamidomethyl [C6; C7; C14]; 1xTMTpro [N-Term]	8.61578e-07	4.83621e-05	1	1	1	2	Q68EF0 [362-376]	Q68EF0 3xCarbamidomethyl [C367; C368; C375]	0	2188.98	1.055	0.314276	0.67988	618.2	586.1	9.19	5.92	591.3	676.6	549.6	646.3	609.9	530.1	592.1	580.1		High	High	High	High	High	High	High	High	High	n/a	2.13e-05		1.011e-07		20		100
Q01853	Transitional endoplasmic reticulum ATPase OS=Mus musculus OX=10090 GN=Vcp PE=1 SV=4	[R].LGDVISIQPCPDVK.[Y]	1xCarbamidomethyl [C10]; 1xTMTpro [K14]; 1xTMTpro [N-Term]	5.8211e-07	4.83621e-05	1	1	1	3	Q01853 [96-109]	Q01853 1xCarbamidomethyl [C105]	0	2149.22	1.072	0.452825	0.773639	3160.6	2947.9	16.35	16.95	3615.6	2758	3719.1	2762.8	2310.2	2786.9	3118.1	3474.2		High	High	High	High	High	High	High	High	High	n/a	2.13e-05		6.019e-08		39		100
Q99J23	GH3 domain-containing protein OS=Mus musculus OX=10090 GN=Ghdc PE=2 SV=2	[R].LGDVVQVVGTYNQCPVVR.[F]	1xCarbamidomethyl [C14]; 1xTMTpro [N-Term]	3.86166e-06	4.83621e-05	1	1	1	1	Q99J23 [365-382]	Q99J23 1xCarbamidomethyl [C378]	0	2307.25	1.068	0.137977	0.494986	450.9	422	8.19	4.64	452.1	526	449.7	446.4	461.4	421.2	422.8	420.2		High	High	High	High	High	High	High	High	High	n/a	2.13e-05		7.209e-07		59		100
Q61644	Protein kinase C and casein kinase substrate in neurons protein 1 OS=Mus musculus OX=10090 GN=Pacsin1 PE=1 SV=1	[K].LGEEDEQGWCR.[G]	1xCarbamidomethyl [C10]; 1xTMTpro [N-Term]	5.74423e-07	4.83621e-05	1	1	1	1	Q61644 [412-422]	Q61644 1xCarbamidomethyl [C421]	0	1682.78	1.132	0.0529242	0.344263	1144.4	1011.2	11.93	7.99	1155.3	1133.6	1404.7	1087	899.1	993.8	1028.9	1090.8		High	High	High	High	High	High	High	High	High	n/a	2.13e-05		5.916e-08		64		100
Q3ULB5	Serine/threonine-protein kinase PAK 6 OS=Mus musculus OX=10090 GN=Pak6 PE=2 SV=1	[K].IGEGSTGIVCLAR.[E]	1xCarbamidomethyl [C10]; 1xTMTpro [N-Term]	2.60987e-05	4.83621e-05	1	1	1	1	Q3ULB5 [414-426]	Q3ULB5 1xCarbamidomethyl [C423]	0	1636.9	0.932	0.111579	0.453517	1230.5	1320	6.65	3.1	1148	1272.9	1189.5	1330.6	1311	1286.5	1383.5	1329.1		High	High	High	High	High	High	High	High	High	Low	2.13e-05	0.9626	9.005e-06	1	21	1.98	100
E9PX29	Spectrin beta chain OS=Mus musculus OX=10090 GN=Sptbn4 PE=1 SV=1	[K].LGEIRQCWAELESTTQAK.[A]	1xCarbamidomethyl [C7]; 1xTMTpro [K18]; 1xTMTpro [N-Term]	1.73394e-05	4.83621e-05	1	1	1	1	E9PX29 [1381-1398]	E9PX29 1xCarbamidomethyl [C1387]	1	2728.46	0.963	0.32026	0.685084	371.1	385.3	9.18	3.59	375.7	366.6	324.8	406.8	408.2	390.1	380.5	377		High	High	High	High	High	High	High	High	n/a	High		0.0003185		6.559e-06		4.14	100
Q9DB26	Phytanoyl-CoA dioxygenase domain-containing protein 1 OS=Mus musculus OX=10090 GN=Phyhd1 PE=1 SV=2	[R].IGEIVAEMDVPLHCR.[T]	1xCarbamidomethyl [C14]; 1xTMTpro [N-Term]	4.12822e-08	4.83621e-05	1	1	1	1	Q9DB26 [36-50]	Q9DB26 1xCarbamidomethyl [C49]	0	2043.07	1.362	0.040558	0.312103	557	408.9	14.74	7.57	567.8	546.4	582.4	412.9	428	390.7	369.7	434.1		High	High	High	High	High	High	High	High	High	n/a	2.13e-05		1.904e-09		70		100
O08756	3-hydroxyacyl-CoA dehydrogenase type-2 OS=Mus musculus OX=10090 GN=Hsd17b10 PE=1 SV=4	[K].LGESCIFAPANVTSEK.[E]	1xCarbamidomethyl [C5]; 1xTMTpro [K16]; 1xTMTpro [N-Term]	2.16279e-11	4.83621e-05	1	1	1	2	O08756 [54-69]	O08756 1xCarbamidomethyl [C58]	0	2331.25	1.019	0.85474	0.955073	2374.5	2330.1	6.03	4.36	2496.9	2164.9	2416	2333.6	2438.3	2236.6	2257.9	2404.7		High	High	High	High	High	High	High	High	High	Low	2.13e-05	0.9444	9.817e-14	1	109	2.32	100
Q8CIE6	Coatomer subunit alpha OS=Mus musculus OX=10090 GN=Copa PE=1 SV=2	[K].LGEVALLQGNHQIVEMCYQR.[T]	1xCarbamidomethyl [C17]; 1xTMTpro [N-Term]	5.93244e-10	4.83621e-05	1	1	1	2	Q8CIE6 [677-696]	Q8CIE6 1xCarbamidomethyl [C693]	0	2662.38	1.079	0.353939	0.709985	1971.8	1826.7	5.36	5.29	1988.9	2000.2	1777.8	1954.9	1996	1792.6	1861.6	1782.8		High	High	High	High	High	High	High	High	High	n/a	2.13e-05		7.465e-12		82		100
P63323	40S ribosomal protein S12 OS=Mus musculus OX=10090 GN=Rps12 PE=1 SV=2	[K].LGEWVGLCK.[I]	1xCarbamidomethyl [C8]; 1xTMTpro [K9]; 1xTMTpro [N-Term]	5.11946e-05	4.83621e-05	1	1	1	3	P63323 [85-93]	P63323 1xCarbamidomethyl [C92]	0	1669.96	0.986	0.344385	0.703951	3550.4	3600.1	7.08	3.01	3717.4	3155.5	3630.5	3472.1	3601.7	3551.9	3798.5	3598.6		High	High	High	High	High	High	High	High	High	n/a	2.13e-05		2.265e-05		33		100
P29387	Guanine nucleotide-binding protein subunit beta-4 OS=Mus musculus OX=10090 GN=Gnb4 PE=1 SV=4	[K].TFVSGACDASSK.[L]	1xCarbamidomethyl [C7]; 1xTMTpro [K12]; 1xTMTpro [N-Term]	4.56122e-08	4.83621e-05	1	1	1	3	P29387 [198-209]	P29387 1xCarbamidomethyl [C204]	0	1837.96	0.888	0.321558	0.685871	2475.4	2787.7	8.26	11.97	2866.8	2414.8	2428.2	2523.5	2426.8	3087.8	3033.7	2561.7		High	High	High	High	High	High	High	High	High	n/a	2.13e-05		2.166e-09		68		100
P56818	Beta-secretase 1 OS=Mus musculus OX=10090 GN=Bace1 PE=1 SV=2	[R].IGFAVSACHVHDEFR.[T]	1xCarbamidomethyl [C8]; 1xTMTpro [N-Term]	1.23071e-08	4.83621e-05	1	1	1	3	P56818 [413-427]	P56818 1xCarbamidomethyl [C420]	0	2049.03	1.005	0.619826	0.862874	907.6	903.4	7.68	6.44	871.1	994.9	840.8	945.6	936.2	880	927.5	811.3		High	High	High	High	High	High	High	High	High	Low	2.13e-05	0.9637	3.909e-10	1	80	0.73	100
Q3UUG6	TBC1 domain family member 24 OS=Mus musculus OX=10090 GN=Tbc1d24 PE=1 SV=2	[K].LGFFGTGECFVFR.[L]	1xCarbamidomethyl [C9]; 1xTMTpro [N-Term]	2.22425e-08	4.83621e-05	1	1	1	4	Q3UUG6 [422-434]	Q3UUG6 1xCarbamidomethyl [C430]	0	1840.94	0.963	0.750997	0.917868	3233.8	3358.3	14.27	8.11	2962.2	3272.7	4069.8	3195.3	2882.3	3351.9	3364.6	3482.9		High	High	High	High	High	High	High	High	High	n/a	2.13e-05		8.48e-10		50		100
Q9Z0H3	SWI/SNF-related matrix-associated actin-dependent regulator of chromatin subfamily B member 1 OS=Mus musculus OX=10090 GN=Smarcb1 PE=1 SV=1	[R].TFPLCFDDHDPAVIHENASQPEVLVPIR.[L]	1xCarbamidomethyl [C5]; 1xTMTpro [N-Term]	2.04717e-10	4.83621e-05	1	1	1	1	Q9Z0H3 [163-190]	Q9Z0H3 1xCarbamidomethyl [C167]	0	3520.79	0.795	0.00113762	0.104011	491.9	619.2	2.33	5.45	491.8	492.1	513.5	488	630.3	678.6	603.5	608.2		High	High	High	High	High	High	High	High	High	n/a	2.13e-05		1.846e-12		80		100
F8VPN4	Glycogen debranching enzyme OS=Mus musculus OX=10090 GN=Agl PE=1 SV=1	[R].IGVDNHVLPLDCVTLQTFLAK.[C]	1xCarbamidomethyl [C12]; 1xTMTpro [K21]; 1xTMTpro [N-Term]	1.85073e-05	4.83621e-05	1	1	1	2	F8VPN4 [115-135]	F8VPN4 1xCarbamidomethyl [C126]	0	2961.67	0.954	0.430085	0.761213	1935.8	2030	10.27	5.12	1969.9	1754.1	2236.6	1902.4	1972.2	2075.1	1985.8	2201.2		High	High	High	High	High	High	High	High	n/a	High		0.0003185		7.158e-06		7.77	100
Q8CGC7	Bifunctional glutamate/proline--tRNA ligase OS=Mus musculus OX=10090 GN=Eprs1 PE=1 SV=4	[K].LGVENCYFPIFVSQAALEK.[E]	1xCarbamidomethyl [C6]; 1xTMTpro [K19]; 1xTMTpro [N-Term]	4.11992e-07	4.83621e-05	1	1	1	1	Q8CGC7 [1071-1089]	Q8CGC7 1xCarbamidomethyl [C1076]	0	2793.51	0.829	0.269143	0.637596	368.1	444.1	13.92	9.05	379.8	356.8	470.6	355.8	373.6	452.2	459	436.1		High	High	High	High	High	High	High	High	High	n/a	2.13e-05		3.861e-08		64		100
P17710	Hexokinase-1 OS=Mus musculus OX=10090 GN=Hk1 PE=1 SV=3	[R].LGVEPSHDDCVSVQHVCTIVSFR.[S]	2xCarbamidomethyl [C10; C17]; 1xTMTpro [N-Term]	5.05887e-14	4.83621e-05	1	1	1	10	P17710 [415-437]	P17710 2xCarbamidomethyl [C424; C431]	0	2945.46	1.19	0.0663518	0.374854	3522.6	2959.3	10.98	4.53	2975.7	3536	3904.3	3509.3	2967.6	3157.2	2830.6	2951		High	High	High	High	High	High	High	High	High	Low	2.13e-05	0.9253	5.263e-16	1	104	2.35	100
Q922S4	cGMP-dependent 3',5'-cyclic phosphodiesterase OS=Mus musculus OX=10090 GN=Pde2a PE=1 SV=4	[K].LKCECQALLQVAK.[N]	2xCarbamidomethyl [C3; C5]; 2xTMTpro [K2; K13]; 1xTMTpro [N-Term]	2.91183e-05	4.83621e-05	1	1	1	1	Q922S4 [388-400]	Q922S4 2xCarbamidomethyl [C390; C392]	1	2473.45	1.045	0.814613	0.941138	1179	1128.6	14.6	9.18	1300.6	1000.6	1353.3	1068.8	1296.2	1046.9	1112	1145.4		High	High	High	High	High	High	High	High	n/a	High		0.0003185		1.252e-05		6.08	100
P01867	Immunoglobulin heavy constant gamma 2B OS=Mus musculus OX=10090 GN=Ighg2b PE=1 SV=3	[K].TDSFSCNVR.[H]	1xCarbamidomethyl [C6]; 1xTMTpro [N-Term]	1.06779e-05	4.83621e-05	1	1	1	2	P01867 [308-316]	P01867 1xCarbamidomethyl [C313]	0	1389.68	4.412	0.0028813	0.134162	2535.7	574.8	32.26	9.9	2932.2	2192.9	3145.5	1423.4	541.3	500.5	617	610.4		High	High	High	High	High	High	High	High	High	Low	2.13e-05	0.9334	2.745e-06	1	37	0.77	100
Q61730	Interleukin-1 receptor accessory protein OS=Mus musculus OX=10090 GN=Il1rap PE=1 SV=1	[R].IKCPLFEHFLK.[Y]	1xCarbamidomethyl [C3]; 2xTMTpro [K2; K11]; 1xTMTpro [N-Term]	2.26375e-05	4.83621e-05	1	1	1	1	Q61730 [45-55]	Q61730 1xCarbamidomethyl [C47]	1	2344.4	0.834	0.259209	0.629635	561.7	673.5	13.87	11.41	673.1	501.8	607.4	519.5	685.1	535.4	662.1	692.9		High	High	High	High	High	High	High	High	High	n/a	2.13e-05		7.474e-06		19		100
Q8R5H1	Ubiquitin carboxyl-terminal hydrolase 15 OS=Mus musculus OX=10090 GN=Usp15 PE=1 SV=1	[K].LKDCIELFTTK.[E]	1xCarbamidomethyl [C4]; 2xTMTpro [K2; K11]; 1xTMTpro [N-Term]	7.64446e-07	4.83621e-05	1	1	1	1	Q8R5H1 [788-798]	Q8R5H1 1xCarbamidomethyl [C791]	1	2280.35	0.803	0.641521	0.872708	1608.9	2003.7	23.42	25.91	1723.9	1290.1	2208.4	1501.6	1171.9	1911.1	2100.7	2265.8		High	High	High	High	High	High	High	High	High	n/a	2.13e-05		8.654e-08		23		100
Q8K4T5	Dual specificity protein phosphatase 19 OS=Mus musculus OX=10090 GN=Dusp19 PE=2 SV=1	[K].LKDGVVLVHCNAGVSR.[A]	1xCarbamidomethyl [C10]; 1xTMTpro [K2]; 1xTMTpro [N-Term]	6.03077e-08	4.83621e-05	1	1	1	1	Q8K4T5 [140-155]	Q8K4T5 1xCarbamidomethyl [C149]	1	2332.34	0.884	0.196551	0.567464	621.8	703.1	7.87	13.4	661.9	644.4	553.8	600	583.6	656.8	789.1	752.7		High	High	High	High	High	High	High	High	High	n/a	2.13e-05		3.114e-09		39		100
Q8CBE3	WD repeat-containing protein 37 OS=Mus musculus OX=10090 GN=Wdr37 PE=1 SV=1	[R].TDSAINRINVCVGQK.[I]	1xCarbamidomethyl [C11]; 1xTMTpro [K15]; 1xTMTpro [N-Term]	2.39578e-06	4.83621e-05	1	1	1	1	Q8CBE3 [409-423]	Q8CBE3 1xCarbamidomethyl [C419]	1	2283.27	0.868	0.0156534	0.221684	830.2	955.9	6.1	3.1	887	766.8	845	815.7	952.5	899.8	961.4	959.4		High	High	High	High	High	High	High	High	High	n/a	2.13e-05		3.837e-07		22		100
D3Z7P3	Glutaminase kidney isoform, mitochondrial OS=Mus musculus OX=10090 GN=Gls PE=1 SV=1	[R].LKECMDMLR.[L]	1xCarbamidomethyl [C4]; 1xTMTpro [K2]; 1xTMTpro [N-Term]	7.3077e-05	4.83621e-05	1	1	1	2	D3Z7P3 [180-188]	D3Z7P3 1xCarbamidomethyl [C183]	1	1803.98	0.995	0.977974	0.993857	2067.6	2078.3	13.62	12.04	2437.8	2022.5	1750.5	2113.8	1791.7	1941.6	2332.8	2224.5		High	High	High	High	High	High	High	High	n/a	High		0.001956		0.09481		1.84	100
Q3TIR3	Synembryn-A OS=Mus musculus OX=10090 GN=Ric8a PE=1 SV=2	[R].LKECVAPVLNVLTECAR.[M]	2xCarbamidomethyl [C4; C15]; 1xTMTpro [K2]; 1xTMTpro [N-Term]	1.00145e-08	4.83621e-05	1	1	1	2	Q3TIR3 [326-342]	Q3TIR3 2xCarbamidomethyl [C329; C340]	1	2580.45	0.961	0.0401145	0.310816	1366.7	1422.6	2.18	2.57	1376.3	1357.2	1407.4	1337.5	1398.5	1435.2	1481.3	1410.1		High	High	High	High	High	High	High	High	High	High	2.13e-05	0.0003185	2.98e-10	0.0151	52	3.58	100
Q61838	Pregnancy zone protein OS=Mus musculus OX=10090 GN=Pzp PE=1 SV=3	[K].IKEEGTGIELTGIGSCEIANALSK.[L]	1xCarbamidomethyl [C16]; 2xTMTpro [K2; K24]; 1xTMTpro [N-Term]	4.25435e-10	4.83621e-05	1	1	1	1	Q61838 [325-348]	Q61838 1xCarbamidomethyl [C340]	1	3402.9	0.674	0.6334	0.868536	663.7	985.1	65.88	18.79	715.8	605.5	1908.3	615.5	777.5	959.3	1011.5	1231.7		High	High	High	High	High	High	High	High	High	n/a	2.13e-05		4.808e-12		38		100
P51863	V-type proton ATPase subunit d 1 OS=Mus musculus OX=10090 GN=Atp6v0d1 PE=1 SV=2	[K].LKEQECRNIVWIAECIAQR.[H]	2xCarbamidomethyl [C6; C15]; 1xTMTpro [K2]; 1xTMTpro [N-Term]	1.05427e-07	4.83621e-05	1	1	1	2	P51863 [321-339]	P51863 2xCarbamidomethyl [C326; C335]	2	3024.64	0.944	0.762876	0.922887	3190.9	3380.1	13.58	10.6	3257.6	2823.2	3879.7	3125.6	2940.6	3596.3	3177	3697.6		High	High	High	High	High	High	High	High	High	n/a	2.13e-05		6.466e-09		23		100
P58802	TBC1 domain family member 10A OS=Mus musculus OX=10090 GN=Tbc1d10a PE=1 SV=1	[K].LKACQGQYETIEQLR.[S]	1xCarbamidomethyl [C4]; 1xTMTpro [K2]; 1xTMTpro [N-Term]	1.17473e-08	4.83621e-05	1	1	1	1	P58802 [321-335]	P58802 1xCarbamidomethyl [C324]	1	2445.34	0.756	0.000456096	0.0887932	981.6	1299.1	5.73	6.43	1039.1	997.2	906.1	966.4	1283.1	1234.6	1433.5	1315.2		High	High	High	High	High	High	High	High	High	n/a	2.13e-05		3.689e-10		18		100
Q9JKV1	Proteasomal ubiquitin receptor ADRM1 OS=Mus musculus OX=10090 GN=Adrm1 PE=1 SV=2	[K].TDQDEEHCR.[K]	1xCarbamidomethyl [C8]; 1xTMTpro [N-Term]	6.67315e-05	4.83621e-05	1	1	1	1	Q9JKV1 [114-122]	Q9JKV1 1xCarbamidomethyl [C121]	0	1493.66	0.881	0.864188	0.95947	102	115.7	11.18	22.16	95.3	101.6	122.5	102.4	77.4	104.6	128.9	128.1		High	High	High	High	High	High	High	High	High	Low	2.13e-05	0.9689	3.291e-05	1	40	0.96	100
Q9R0K7	Plasma membrane calcium-transporting ATPase 2 OS=Mus musculus OX=10090 GN=Atp2b2 PE=1 SV=2	[K].IKETYGDTEAICRR.[L]	1xCarbamidomethyl [C12]; 1xTMTpro [K2]; 1xTMTpro [N-Term]	1.83872e-05	4.83621e-05	1	1	1	2	Q9R0K7 [46-59]	Q9R0K7 1xCarbamidomethyl [C57]	2	2320.26	0.779	0.0274875	0.271425	2037.3	2613.8	4.35	11.05	2059.6	2015.3	1919.6	2131	2125.2	2641.8	2763.9	2586.2		High	High	High	High	High	High	High	High	n/a	High		0.0003185		0.0002905		3.84	100
P47757	F-actin-capping protein subunit beta OS=Mus musculus OX=10090 GN=Capzb PE=1 SV=3	[K].IKGCWDSIHVVEVQEK.[S]	1xCarbamidomethyl [C4]; 2xTMTpro [K2; K16]; 1xTMTpro [N-Term]	7.39462e-07	4.83621e-05	1	1	1	1	P47757 [144-159]	P47757 1xCarbamidomethyl [C147]	1	2839.6	0.895	0.375161	0.724307	1263.5	1411.8	12.56	12.77	1449.2	1110.6	1365.5	1169.1	1166.5	1334.3	1493.9	1565.3		High	High	High	High	High	High	High	High	High	n/a	2.13e-05		8.229e-08		22		100
P42859	Huntingtin OS=Mus musculus OX=10090 GN=Htt PE=1 SV=2	[R].IKGDIGQPNDDDSAPLVHCVR.[L]	1xCarbamidomethyl [C19]; 1xTMTpro [K2]; 1xTMTpro [N-Term]	5.8211e-07	4.83621e-05	1	1	1	1	P42859 [646-666]	P42859 1xCarbamidomethyl [C664]	1	2914.53	0.901	0.000767637	0.0928221	642.3	712.7	2.58	2.44	646.6	638	655.1	616.6	697.1	705	720.5	736.5		High	High	High	High	High	High	High	High	High	n/a	2.13e-05		6.029e-08		62		100
P32921	Tryptophan--tRNA ligase, cytoplasmic OS=Mus musculus OX=10090 GN=Wars1 PE=1 SV=2	[R].TDIQCLIPCAIDQDPYFR.[M]	2xCarbamidomethyl [C5; C9]; 1xTMTpro [N-Term]	1.01979e-07	4.83621e-05	1	1	1	2	P32921 [305-322]	P32921 2xCarbamidomethyl [C309; C313]	0	2529.24	0.92	0.0705596	0.38203	791.2	859.9	4.58	7.65	789.2	841.4	793.1	752.9	975.9	859.7	820.4	860.1		High	High	High	High	High	High	High	High	High	n/a	2.13e-05		6.224e-09		60		100
Q69ZR2	E3 ubiquitin-protein ligase HECTD1 OS=Mus musculus OX=10090 GN=Hectd1 PE=1 SV=2	[R].TDLGTWLCDDNFPDDESR.[H]	1xCarbamidomethyl [C8]; 1xTMTpro [N-Term]	3.69343e-09	4.83621e-05	1	1	1	2	Q69ZR2 [2193-2210]	Q69ZR2 1xCarbamidomethyl [C2200]	0	2460.09	0.978	0.755204	0.919947	530.7	542.5	2.01	8.71	512.2	533.5	528	535.6	514.5	481.9	579.3	572		High	High	High	High	High	High	High	High	High	n/a	2.13e-05		8.092e-11		65		100
Q80TM9	Nischarin OS=Mus musculus OX=10090 GN=Nisch PE=1 SV=2	[K].TDLGHILDFTCR.[L]	1xCarbamidomethyl [C11]; 1xTMTpro [N-Term]	4.83962e-05	4.83621e-05	1	1	1	2	Q80TM9 [176-187]	Q80TM9 1xCarbamidomethyl [C186]	0	1751.91	0.967	0.172643	0.536968	1376.6	1423.8	5.67	2.89	1431.2	1423.6	1270.2	1331.2	1491	1404.4	1443.5	1403.1		High	High	High	High	High	High	High	High	High	n/a	2.13e-05		2.091e-05		45		100
Q920I9	WD repeat-containing protein 7 OS=Mus musculus OX=10090 GN=Wdr7 PE=1 SV=3	[K].LKPCPAGIIDQLSVIPNSNEPLK.[V]	1xCarbamidomethyl [C4]; 2xTMTpro [K2; K23]; 1xTMTpro [N-Term]	2.57465e-08	4.83621e-05	1	1	1	9	Q920I9 [386-408]	Q920I9 1xCarbamidomethyl [C389]	1	3415.98	0.922	0.649245	0.87748	6018.4	6530.8	8.09	12.99	6821.9	5696.4	5861.6	6179.3	5360.1	6108.9	7155.9	6981.8		High	High	High	High	High	High	High	High	High	n/a	2.13e-05		1.03e-09		28		100
Q9CZ30	Obg-like ATPase 1 OS=Mus musculus OX=10090 GN=Ola1 PE=1 SV=1	[K].LKPEYDIMCK.[V]	1xCarbamidomethyl [C9]; 2xTMTpro [K2; K10]; 1xTMTpro [N-Term]	5.82084e-06	4.83621e-05	1	1	1	1	Q9CZ30 [179-188]	Q9CZ30 1xCarbamidomethyl [C187]	1	2209.25	0.834	0.241184	0.611635	1184.1	1420.3	13.67	14.33	1352.7	1004.1	1281.5	1094.2	1072.5	1446.3	1394.7	1507.8		High	High	High	High	High	High	High	High	High	n/a	2.13e-05		1.235e-06		26		100
Q91YT0	NADH dehydrogenase [ubiquinone] flavoprotein 1, mitochondrial OS=Mus musculus OX=10090 GN=Ndufv1 PE=1 SV=1	[R].LKPPFPADVGVFGCPTTVANVETVAVSPTICR.[R]	2xCarbamidomethyl [C14; C31]; 1xTMTpro [K2]; 1xTMTpro [N-Term]	1.10107e-09	4.83621e-05	1	1	1	5	Q91YT0 [225-256]	Q91YT0 2xCarbamidomethyl [C238; C255]	1	4008.16	1.132	0.797032	0.935519	2791	2466.3	27.24	9.51	3481.3	2993.2	1739.6	2602.5	2330.4	2317.5	2610.1	2814.9		High	High	High	High	High	High	High	High	High	n/a	2.13e-05		1.67e-11		65		100
Q91YT0	NADH dehydrogenase [ubiquinone] flavoprotein 1, mitochondrial OS=Mus musculus OX=10090 GN=Ndufv1 PE=1 SV=1	[R].LKPPFPADVGVFGCPTTVANVETVAVSPTICRR.[G]	2xCarbamidomethyl [C14; C31]; 1xTMTpro [K2]; 1xTMTpro [N-Term]	3.48493e-10	4.83621e-05	1	1	1	2	Q91YT0 [225-257]	Q91YT0 2xCarbamidomethyl [C238; C255]	2	4164.26	1.163	0.736549	0.912753	1494.8	1284.8	35.49	11	1982.4	1672.4	785.1	1336	1259.2	1089.2	1310.9	1425.7		High	High	High	High	High	High	High	High	High	n/a	2.13e-05		3.721e-12		45		100
Q9R0K7	Plasma membrane calcium-transporting ATPase 2 OS=Mus musculus OX=10090 GN=Atp2b2 PE=1 SV=2	[K].IKETYGDTEAICR.[R]	1xCarbamidomethyl [C12]; 1xTMTpro [K2]; 1xTMTpro [N-Term]	6.26263e-07	4.83621e-05	1	1	1	1	Q9R0K7 [46-58]	Q9R0K7 1xCarbamidomethyl [C57]	1	2164.16	0.656	0.0273774	0.271088	892.1	1358.9	12.74	19.68	887.3	896.9	720.9	988.1	942.4	1416	1534.1	1304.1		High	High	High	High	High	High	High	High	High	n/a	2.13e-05		6.631e-08		19		100
Q9QXT0	Protein canopy homolog 2 OS=Mus musculus OX=10090 GN=Cnpy2 PE=1 SV=1	[R].TDLCDHALHR.[S]	1xCarbamidomethyl [C4]; 1xTMTpro [N-Term]	2.01412e-05	4.83621e-05	1	1	1	2	Q9QXT0 [168-177]	Q9QXT0 1xCarbamidomethyl [C171]	0	1541.78	0.969	0.470182	0.78474	462.7	477.6	7.13	3.88	431.2	469.6	510.7	455.8	504	466.6	488.9	465.3		High	High	High	High	High	High	High	High	High	n/a	2.13e-05		6.392e-06		44		100
Q9WUA3	ATP-dependent 6-phosphofructokinase, platelet type OS=Mus musculus OX=10090 GN=Pfkp PE=1 SV=1	[R].LKAACNLAR.[L]	1xCarbamidomethyl [C5]; 1xTMTpro [K2]; 1xTMTpro [N-Term]	6.96292e-05	4.83621e-05	1	1	1	1	Q9WUA3 [107-115]	Q9WUA3 1xCarbamidomethyl [C111]	1	1624.98	0.97	0.616323	0.860972	640.7	660.5	10.32	8.76	719.6	643	558	638.3	732.8	595.5	642.6	678.8		High	High	High	High	High	High	High	High	n/a	High		0.004429		0.1593		1.98	100
P62855	40S ribosomal protein S26 OS=Mus musculus OX=10090 GN=Rps26 PE=1 SV=3	[K].LHYCVSCAIHSK.[V]	2xCarbamidomethyl [C4; C7]; 1xTMTpro [K12]; 1xTMTpro [N-Term]	1.30661e-08	4.83621e-05	1	1	1	4	P62855 [71-82]	P62855 2xCarbamidomethyl [C74; C77]	0	2083.11	1.256	0.0286845	0.275761	2904.2	2311.5	11.22	9.16	2988.3	2822.5	2334.3	3003.2	1933.3	2264.2	2369.1	2359.7		High	High	High	High	High	High	High	High	High	n/a	2.13e-05		4.243e-10		40		100
Q62277	Synaptophysin OS=Mus musculus OX=10090 GN=Syp PE=1 SV=2	[R].LHQVYFDAPSCVKGGTTK.[I]	1xCarbamidomethyl [C11]; 2xTMTpro [K13; K18]; 1xTMTpro [N-Term]	2.17343e-10	4.83621e-05	1	1	1	2	Q62277 [77-94]	Q62277 1xCarbamidomethyl [C87]	1	2920.62	1.056	0.990179	0.997258	1878.1	1779.2	35.85	30.26	2685.4	1806.4	1047.1	1952.5	1268.3	1468.4	2438.7	2155.9		High	High	High	High	High	High	High	High	High	n/a	2.13e-05		2.004e-12		30		100
Q8VD65	Phosphoinositide 3-kinase regulatory subunit 4 OS=Mus musculus OX=10090 GN=Pik3r4 PE=1 SV=3	[R].LHSAQNCLPFQK.[A]	1xCarbamidomethyl [C7]; 1xTMTpro [K12]; 1xTMTpro [N-Term]	7.59382e-07	4.83621e-05	1	1	1	1	Q8VD65 [78-89]	Q8VD65 1xCarbamidomethyl [C84]	0	2051.14	0.83	0.0915021	0.422898	440.1	530.3	4.56	10.39	469.8	442.7	437.4	421.2	428.1	532.3	538.8	528.2		High	High	High	High	High	High	High	High	High	n/a	2.13e-05		8.554e-08		38		100
Q9JKY5; Q8VD75	Huntingtin-interacting protein 1-related protein OS=Mus musculus OX=10090 GN=Hip1r PE=1 SV=2 Huntingtin-interacting protein 1 OS=Mus musculus OX=10090 GN=Hip1 PE=1 SV=2	[K].LHSCLPADTLQGHR.[D]	1xCarbamidomethyl [C4]; 1xTMTpro [N-Term]	6.78257e-07	4.83621e-05	2	2	1	2	Q9JKY5 [237-250]; Q8VD75 [246-259]	Q9JKY5 1xCarbamidomethyl [C240]; Q8VD75 1xCarbamidomethyl [C249]	0	1909	0.896	0.836785	0.949508	1486.5	1658.7	23.74	22.23	2116.1	1526.7	1240	1447.4	1203.9	1484	2011.1	1854	Shared	High	High	High	High	High	High	High	High	High	n/a	2.13e-05		7.387e-08		69		100
Q6KAR6	Exocyst complex component 3 OS=Mus musculus OX=10090 GN=Exoc3 PE=1 SV=2	[K].TEAEEGLCLSQPSMDGILDAIAK.[E]	1xCarbamidomethyl [C8]; 1xTMTpro [K23]; 1xTMTpro [N-Term]	3.27206e-06	4.83621e-05	1	1	1	1	Q6KAR6 [524-546]	Q6KAR6 1xCarbamidomethyl [C531]	0	3056.58	0.96	0.163195	0.524958	452.8	471.7	4.39	2.83	440.1	477	435.7	465.9	476.6	466.9	491.9	461.2		High	High	High	High	High	High	High	High	High	n/a	2.13e-05		5.771e-07		35		100
Q3UVC0	Kinase suppressor of Ras 2 OS=Mus musculus OX=10090 GN=Ksr2 PE=1 SV=2	[K].IHSGVGSCENIPAQQR.[S]	1xCarbamidomethyl [C8]; 1xTMTpro [N-Term]	1.21445e-08	4.83621e-05	1	1	1	1	Q3UVC0 [342-357]	Q3UVC0 1xCarbamidomethyl [C349]	0	2057.05	0.997	0.744197	0.915104	704.4	706.8	12.44	8.99	752.1	828.7	659.7	633.4	742.2	755.6	673.1	621		High	High	High	High	High	High	High	High	High	Low	2.13e-05	0.9689	3.852e-10	1	49	1.92	100
Q9JHU4	Cytoplasmic dynein 1 heavy chain 1 OS=Mus musculus OX=10090 GN=Dync1h1 PE=1 SV=2	[K].LHSLQPHACFR.[L]	1xCarbamidomethyl [C9]; 1xTMTpro [N-Term]	2.05664e-06	4.83621e-05	1	1	1	6	Q9JHU4 [4111-4121]	Q9JHU4 1xCarbamidomethyl [C4119]	0	1669.89	0.991	0.824886	0.944454	1225.9	1236.8	3.68	7.65	1168.3	1265.1	1200.9	1251.5	1345.1	1271.1	1123.7	1203.4		High	High	High	High	High	High	High	High	High	n/a	2.13e-05		3.145e-07		68		100
O89112	Glutathione S-transferase LANCL1 OS=Mus musculus OX=10090 GN=Lancl1 PE=1 SV=1	[K].LHSLVKPSVDFVCR.[L]	1xCarbamidomethyl [C13]; 1xTMTpro [K6]; 1xTMTpro [N-Term]	4.58227e-07	4.83621e-05	1	1	1	5	O89112 [240-253]	O89112 1xCarbamidomethyl [C252]	1	2265.3	0.817	0.0314344	0.286706	3355.6	4107.1	4.92	9.07	3649.2	3301.5	3410.6	3285.2	3517.7	4013.9	4202.5	4357.9		High	High	High	High	High	High	High	High	High	n/a	2.13e-05		4.419e-08		26		100
Q7TPH6	E3 ubiquitin-protein ligase MYCBP2 OS=Mus musculus OX=10090 GN=Mycbp2 PE=1 SV=3	[K].LHSNPSAFNIYCNVR.[H]	1xCarbamidomethyl [C12]; 1xTMTpro [N-Term]	1.92154e-08	4.83621e-05	1	1	1	1	Q7TPH6 [141-155]	Q7TPH6 1xCarbamidomethyl [C152]	0	2096.07	1.009	0.998581	0.999681	523.9	519.1	7.11	2.98	505.6	552.2	471.9	542.8	528.8	509.6	499.3	531.3		High	High	High	High	High	High	High	High	High	n/a	2.13e-05		6.981e-10		81		100
Q6PB66	Leucine-rich PPR motif-containing protein, mitochondrial OS=Mus musculus OX=10090 GN=Lrpprc PE=1 SV=2	[K].LHSSSLQFTLHCALQANR.[T]	1xCarbamidomethyl [C12]; 1xTMTpro [N-Term]	9.62277e-09	4.83621e-05	1	1	1	1	Q6PB66 [401-418]	Q6PB66 1xCarbamidomethyl [C412]	0	2387.26	0.976	0.485033	0.79297	423.6	433.9	9.48	6.35	413.1	434.3	354	438.1	424.9	390.6	443.1	451.9		High	High	High	High	High	High	High	High	High	n/a	2.13e-05		2.836e-10		59		100
Q80TJ1	Calcium-dependent secretion activator 1 OS=Mus musculus OX=10090 GN=Cadps PE=1 SV=3	[R].TDYNLCNGK.[F]	1xCarbamidomethyl [C6]; 1xTMTpro [K9]; 1xTMTpro [N-Term]	1.45347e-05	4.83621e-05	1	1	1	2	Q80TJ1 [962-970]	Q80TJ1 1xCarbamidomethyl [C967]	0	1692.89	0.983	0.725375	0.908247	1568.5	1596.2	17.81	17.73	1668.3	1285.3	1950.3	1474.7	1135.1	1567.5	1625.4	1758.2		High	High	High	High	High	High	High	High	High	Low	2.13e-05	0.5733	4.121e-06	0.9553	35	1.87	100
P63318	Protein kinase C gamma type OS=Mus musculus OX=10090 GN=Prkcg PE=1 SV=1	[R].LHSYSSPTFCDHCGSLLYGLVHQGMK.[C]	2xCarbamidomethyl [C10; C13]; 1xTMTpro [K26]; 1xTMTpro [N-Term]	2.66407e-06	4.83621e-05	1	1	1	1	P63318 [105-130]	P63318 2xCarbamidomethyl [C114; C117]	0	3602.78	1.718	0.000195068	0.0652741	2190.3	1274.8	7.59	3.77	2266.6	2225.2	1904.7	2155.9	1342.7	1227.3	1264.7	1285		High	High	High	High	High	High	High	High	High	n/a	2.13e-05		4.416e-07		29		100
Q8K0C9	GDP-mannose 4,6 dehydratase OS=Mus musculus OX=10090 GN=Gmds PE=1 SV=1	[K].LHYGDLTDSTCLVK.[I]	1xCarbamidomethyl [C11]; 1xTMTpro [K14]; 1xTMTpro [N-Term]	1.07031e-08	4.83621e-05	1	1	1	1	Q8K0C9 [82-95]	Q8K0C9 1xCarbamidomethyl [C92]	0	2230.2	1.115	0.061202	0.363196	667.6	598.9	5.98	0.88	601.9	687.5	682.3	653.3	594.9	600.8	597.1	607		High	High	High	High	High	High	High	High	High	n/a	2.13e-05		3.269e-10		56		100
Q9CQC6	eIF5-mimic protein 2 OS=Mus musculus OX=10090 GN=Bzw1 PE=1 SV=1	[R].TDVCVFAAQEDLETMQAFAQVFNK.[L]	1xCarbamidomethyl [C4]; 1xTMTpro [K24]; 1xTMTpro [N-Term]	4.98184e-09	4.83621e-05	1	1	1	1	Q9CQC6 [93-116]	Q9CQC6 1xCarbamidomethyl [C96]	0	3370.69	0.833	0.0155949	0.221684	342	410.4	7.44	5.82	353.1	311.2	369.3	331.2	406.1	366.9	414.8	417.1		High	High	High	High	High	High	High	High	High	n/a	2.13e-05		1.202e-10		57		100
Q80YV3	Transformation/transcription domain-associated protein OS=Mus musculus OX=10090 GN=Trrap PE=1 SV=2	[R].IHTIPTVPIVDCFQK.[I]	1xCarbamidomethyl [C12]; 1xTMTpro [K15]; 1xTMTpro [N-Term]	1.52549e-06	4.83621e-05	1	1	1	1	Q80YV3 [1752-1766]	Q80YV3 1xCarbamidomethyl [C1763]	0	2376.36	1.058	0.149383	0.510145	604.2	571.1	6.44	2.97	601.8	558.8	654.1	606.7	544.8	572	570.3	585.1		High	High	High	High	High	High	High	High	High	n/a	2.13e-05		2.128e-07		55		100
Q80U19; Q8BPM0	Disheveled-associated activator of morphogenesis 2 OS=Mus musculus OX=10090 GN=Daam2 PE=1 SV=4 Disheveled-associated activator of morphogenesis 1 OS=Mus musculus OX=10090 GN=Daam1 PE=1 SV=4	[R].IHTSLIGCIK.[A]	1xCarbamidomethyl [C8]; 1xTMTpro [K10]; 1xTMTpro [N-Term]	1.61349e-07	4.83621e-05	2	2	1	3	Q80U19 [173-182]; Q8BPM0 [177-186]	Q80U19 1xCarbamidomethyl [C180]; Q8BPM0 1xCarbamidomethyl [C184]	0	1750.05	0.862	0.261395	0.631279	1357.1	1573.5	15.08	8.79	1401.2	1281	1753.7	1314.3	1774.6	1550.7	1438.6	1596.7	Shared	High	High	High	High	High	High	High	High	High	n/a	2.13e-05		1.128e-08		62		100
Q9CXW3	Calcyclin-binding protein OS=Mus musculus OX=10090 GN=Cacybp PE=1 SV=1	[K].TDTVIILCRK.[K]	1xCarbamidomethyl [C8]; 1xTMTpro [K10]; 1xTMTpro [N-Term]	0.000103953	4.83621e-05	1	1	1	1	Q9CXW3 [148-157]	Q9CXW3 1xCarbamidomethyl [C155]	1	1827.1	0.801	0.258164	0.628789	548.7	684.9	22.15	8.28	561.1	493.7	788	536.5	612.5	652.9	732.1	718.5		High	High	High	High	High	High	High	High	High	Medium	2.13e-05	0.01942	6.296e-05	0.2873	20	3.25	100
Q9CXW3	Calcyclin-binding protein OS=Mus musculus OX=10090 GN=Cacybp PE=1 SV=1	[K].TDTVIILCR.[K]	1xCarbamidomethyl [C8]; 1xTMTpro [N-Term]	8.09047e-05	4.83621e-05	1	1	1	2	Q9CXW3 [148-156]	Q9CXW3 1xCarbamidomethyl [C155]	0	1394.8	0.858	0.190644	0.560892	1884.7	2196.4	14.09	2.59	1793.8	1816.2	2397.6	1955.8	2207.9	2166.6	2184.9	2296		High	High	High	High	High	High	High	High	High	n/a	2.13e-05		4.332e-05		36		100
A2AWA9	Rab GTPase-activating protein 1 OS=Mus musculus OX=10090 GN=Rabgap1 PE=1 SV=1	[R].IHVFRCEIQEAVSR.[I]	1xCarbamidomethyl [C6]; 1xTMTpro [N-Term]	4.43789e-06	4.83621e-05	1	1	1	1	A2AWA9 [240-253]	A2AWA9 1xCarbamidomethyl [C245]	1	2048.1	1.076	0.287672	0.655749	277.8	258.3	8.41	2.56	245	297	268	288	260.7	267.3	255.9	251.9		High	High	High	High	High	High	High	High	High	Low	2.13e-05	0.1276	8.652e-07	0.5746	29	2.62	100
Q922E6	FAST kinase domain-containing protein 2, mitochondrial OS=Mus musculus OX=10090 GN=Fastkd2 PE=2 SV=2	[K].LHVLNTCLK.[L]	1xCarbamidomethyl [C7]; 1xTMTpro [K9]; 1xTMTpro [N-Term]	6.05097e-05	4.83621e-05	1	1	1	1	Q922E6 [526-534]	Q922E6 1xCarbamidomethyl [C532]	0	1706.03	0.909	0.0868738	0.414959	414	455.6	3.51	8.68	415.3	400.4	412.7	435.6	472.1	515.4	424.7	439.6		High	High	High	High	High	High	High	High	High	n/a	2.13e-05		2.869e-05		40		100
Q8C6G8	WD repeat-containing protein 26 OS=Mus musculus OX=10090 GN=Wdr26 PE=1 SV=3	[R].IHVLSGYLMCSHAEDLR.[A]	1xCarbamidomethyl [C10]; 1xTMTpro [N-Term]	8.82584e-09	4.83621e-05	1	1	1	2	Q8C6G8 [230-246]	Q8C6G8 1xCarbamidomethyl [C239]	0	2305.18	1.043	0.203864	0.575843	612.6	587.2	6.17	5.74	627	653.1	565.4	598.4	594.6	526.6	597.7	579.9		High	High	High	High	High	High	High	High	High	n/a	2.13e-05		2.538e-10		84		100
Q924C1	Exportin-5 OS=Mus musculus OX=10090 GN=Xpo5 PE=1 SV=1	[K].TDSSQEAEAQANCR.[V]	1xCarbamidomethyl [C13]; 1xTMTpro [N-Term]	4.97306e-08	4.83621e-05	1	1	1	2	Q924C1 [209-222]	Q924C1 1xCarbamidomethyl [C221]	0	1870.85	0.91	0.257418	0.628094	508.3	558.4	3.1	10.21	529.2	492.1	513.6	503	478.3	535.2	582.6	605.2		High	High	High	High	High	High	High	High	High	n/a	2.13e-05		2.424e-09		52		100
Q9JIF0	Protein arginine N-methyltransferase 1 OS=Mus musculus OX=10090 GN=Prmt1 PE=1 SV=1	[K].IHWWENVYGFDMSCIK.[D]	1xCarbamidomethyl [C14]; 1xTMTpro [K16]; 1xTMTpro [N-Term]	1.91198e-05	4.83621e-05	1	1	1	1	Q9JIF0 [213-228]	Q9JIF0 1xCarbamidomethyl [C226]	0	2693.35	0.963	0.903395	0.974133	904.1	938.7	7.36	5.33	912.2	896.2	1034.6	887.9	856.6	972.4	941.2	936.3		High	High	High	High	High	High	High	High	High	n/a	2.13e-05		5.925e-06		27		100
Q8BPN8	DmX-like protein 2 OS=Mus musculus OX=10090 GN=Dmxl2 PE=1 SV=3	[R].LHTCLLTSLPPLYR.[V]	1xCarbamidomethyl [C4]; 1xTMTpro [N-Term]	3.12226e-08	4.83621e-05	1	1	1	5	Q8BPN8 [1574-1587]	Q8BPN8 1xCarbamidomethyl [C1577]	0	1988.13	0.977	0.446263	0.769651	1455.5	1489.3	6.47	2.86	1409.7	1502.9	1324.8	1529.4	1523.4	1465.4	1513.5	1432.8		High	High	High	High	High	High	High	High	High	n/a	2.13e-05		1.318e-09		92		100
A2A5R2; G3X9K3	Brefeldin A-inhibited guanine nucleotide-exchange protein 2 OS=Mus musculus OX=10090 GN=Arfgef2 PE=1 SV=1 Brefeldin A-inhibited guanine nucleotide-exchange protein 1 OS=Mus musculus OX=10090 GN=Arfgef1 PE=1 SV=1	[R].TCYNIYLASK.[N]	1xCarbamidomethyl [C2]; 1xTMTpro [K10]; 1xTMTpro [N-Term]	4.09888e-06	4.83621e-05	2	2	1	1	A2A5R2 [165-174]; G3X9K3 [177-186]	A2A5R2 1xCarbamidomethyl [C166]; G3X9K3 1xCarbamidomethyl [C178]	0	1841.01	0.891	0.93924	0.983249	1047.5	1175.1	20.95	17.56	1087.4	897.8	1435.3	1009.1	834.9	1205.5	1145.4	1281.7	Shared	High	High	High	High	High	High	High	High	High	n/a	2.13e-05		7.783e-07		46		100
Q924C1	Exportin-5 OS=Mus musculus OX=10090 GN=Xpo5 PE=1 SV=1	[R].LIAGCIGKPLGEQFR.[K]	1xCarbamidomethyl [C5]; 1xTMTpro [K8]; 1xTMTpro [N-Term]	1.79792e-08	4.83621e-05	1	1	1	1	Q924C1 [1153-1167]	Q924C1 1xCarbamidomethyl [C1157]	1	2267.32	0.911	0.111046	0.453317	1235	1355.4	11.88	6.32	1235.5	1234.6	987	1312.4	1478	1373.7	1337.4	1271.5		High	High	High	High	High	High	High	High	High	n/a	2.13e-05		6.429e-10		44		100
Q9WTS4	Teneurin-1 OS=Mus musculus OX=10090 GN=Tenm1 PE=1 SV=1	[R].IIAGRPIHCQVPGIDHFLVSK.[V]	1xCarbamidomethyl [C9]; 1xTMTpro [K21]; 1xTMTpro [N-Term]	4.8048e-06	4.83621e-05	1	1	1	2	Q9WTS4 [1404-1424]	Q9WTS4 1xCarbamidomethyl [C1412]	1	2965.71	0.923	0.261544	0.631504	727.8	788.5	10.29	11.59	775.9	744.3	607.6	711.7	672.1	817.8	886.6	760.2		High	High	High	High	High	High	High	High	High	n/a	2.13e-05		9.603e-07		35		100
Q8K135	Dyslexia-associated protein KIAA0319-like protein OS=Mus musculus OX=10090 GN=Kiaa0319l PE=1 SV=1	[R].LLAGSLPFHACR.[A]	1xCarbamidomethyl [C11]; 1xTMTpro [N-Term]	4.43789e-06	4.83621e-05	1	1	1	1	Q8K135 [75-86]	Q8K135 1xCarbamidomethyl [C85]	0	1645.92	1.216	0.0753577	0.393001	395.2	324.9	11.45	10.09	405.5	437.2	331	385.1	365.3	301.9	349.7	300.2		High	High	High	High	High	High	High	High	High	n/a	2.13e-05		8.667e-07		42		100
Q920Q4	Vacuolar protein sorting-associated protein 16 homolog OS=Mus musculus OX=10090 GN=Vps16 PE=1 SV=3	[R].ILAHWACYK.[A]	1xCarbamidomethyl [C7]; 1xTMTpro [K9]; 1xTMTpro [N-Term]	4.74162e-06	4.83621e-05	1	1	1	1	Q920Q4 [484-492]	Q920Q4 1xCarbamidomethyl [C490]	0	1770	0.984	0.472749	0.786172	565.4	574.4	5.62	9.86	590.1	541.8	530.2	590.2	664.7	606.3	543.3	544.1		High	High	High	High	High	High	High	High	High	n/a	2.13e-05		9.453e-07		54		100
P26043; P26041	Radixin OS=Mus musculus OX=10090 GN=Rdx PE=1 SV=3 Moesin OS=Mus musculus OX=10090 GN=Msn PE=1 SV=3	[R].ILALCMGNHELYMR.[R]	1xCarbamidomethyl [C5]; 1xTMTpro [N-Term]	3.33694e-08	4.83621e-05	2	2	1	1	P26043 [280-293]; P26041 [280-293]	P26043 1xCarbamidomethyl [C284]; P26041 1xCarbamidomethyl [C284]	0	2025.04	1.064	0.282189	0.651075	783	735.6	4.92	6.59	777	806.3	718.7	789.1	782.5	773.2	689	699.9	Shared	High	High	High	High	High	High	High	High	High	n/a	2.13e-05		1.439e-09		74		100
Q3UH60	Disco-interacting protein 2 homolog B OS=Mus musculus OX=10090 GN=Dip2b PE=1 SV=1	[R].TCVVVAEERPR.[V]	1xCarbamidomethyl [C2]; 1xTMTpro [N-Term]	6.38876e-07	4.83621e-05	1	1	1	2	Q3UH60 [1279-1289]	Q3UH60 1xCarbamidomethyl [C1280]	1	1619.89	1.085	0.119657	0.465298	900.8	829.9	6.85	8.42	861.4	928.4	999.1	874.1	914.6	847	746.7	813.2		High	High	High	High	High	High	High	High	High	n/a	2.13e-05		6.806e-08		42		100
Q5U4D8	Sodium-dependent multivitamin transporter OS=Mus musculus OX=10090 GN=Slc5a6 PE=1 SV=2	[K].LLALLPLSCQK.[R]	1xCarbamidomethyl [C9]; 1xTMTpro [K11]; 1xTMTpro [N-Term]	1.93738e-06	4.83621e-05	1	1	1	1	Q5U4D8 [567-577]	Q5U4D8 1xCarbamidomethyl [C575]	0	1864.16	0.941	0.858424	0.956266	1547.5	1645.2	15.2	3.44	1574.5	1511.1	2037.5	1520.9	1635.2	1655.3	1543.9	1667.3		High	High	High	High	High	High	High	High	High	Low	2.13e-05	0.07481	2.905e-07	0.4822	52	2.06	100
Q8CFQ3	RNA helicase aquarius OS=Mus musculus OX=10090 GN=Aqr PE=1 SV=2	[K].IIAMTCTHAALK.[R]	1xCarbamidomethyl [C6]; 1xTMTpro [K12]; 1xTMTpro [N-Term]	4.74688e-08	4.83621e-05	1	1	1	1	Q8CFQ3 [1038-1049]	Q8CFQ3 1xCarbamidomethyl [C1043]	0	1938.12	0.948	0.729305	0.909364	511.5	539.6	10.71	16.07	478.3	502.9	608.1	520.3	644.2	604	466.6	482		High	High	High	High	High	High	High	High	High	n/a	2.13e-05		2.273e-09		51		100
Q9ERG0	LIM domain and actin-binding protein 1 OS=Mus musculus OX=10090 GN=Lima1 PE=1 SV=3	[R].LLANQQVFHISCFR.[C]	1xCarbamidomethyl [C12]; 1xTMTpro [N-Term]	1.21713e-06	4.83621e-05	1	1	1	1	Q9ERG0 [401-414]	Q9ERG0 1xCarbamidomethyl [C412]	0	2037.1	1.091	0.843486	0.951278	874.8	802	13.64	3.58	871.1	878.5	655.9	890.6	837.3	783.2	821.1	778.2		High	High	High	High	High	High	High	High	High	n/a	2.13e-05		1.585e-07		28		100
P58404; Q9ERG2	Striatin-4 OS=Mus musculus OX=10090 GN=Strn4 PE=1 SV=2 Striatin-3 OS=Mus musculus OX=10090 GN=Strn3 PE=1 SV=1	[K].TCVQEITAHR.[K]	1xCarbamidomethyl [C2]; 1xTMTpro [N-Term]	1.45347e-05	4.83621e-05	2	2	1	2	P58404 [719-728]; Q9ERG2 [755-764]	P58404 1xCarbamidomethyl [C720]; Q9ERG2 1xCarbamidomethyl [C756]	0	1518.8	1.068	0.0737163	0.388594	288.6	270.2	3.4	5.32	275.2	298.2	291.7	285.6	263.5	277	249.9	281.5	Shared	High	High	High	High	High	High	High	High	High	n/a	2.13e-05		4.112e-06		49		100
P12970	60S ribosomal protein L7a OS=Mus musculus OX=10090 GN=Rpl7a PE=1 SV=2	[K].TCTTVAFTQVNSEDK.[G]	1xCarbamidomethyl [C2]; 1xTMTpro [K15]; 1xTMTpro [N-Term]	1.73664e-11	4.83621e-05	1	1	1	2	P12970 [198-212]	P12970 1xCarbamidomethyl [C199]	0	2309.19	1.041	0.374553	0.723975	1093.3	1050.2	6.13	1.89	1158.8	1006.8	1122.6	1064.8	1037.4	1032.9	1073.9	1063.2		High	High	High	High	High	High	High	High	High	n/a	2.13e-05		7.353e-14		113		100
Q3UHK6	Teneurin-4 OS=Mus musculus OX=10090 GN=Tenm4 PE=1 SV=2	[K].LLAPVALTCGSDGSLYVGDFNYIR.[R]	1xCarbamidomethyl [C9]; 1xTMTpro [N-Term]	2.53262e-10	4.83621e-05	1	1	1	2	Q3UHK6 [1231-1254]	Q3UHK6 1xCarbamidomethyl [C1239]	0	2905.51	1.069	0.0812891	0.405759	922	862.8	6.09	1.84	878.1	992.2	884.5	961.1	873.8	857.6	868	837.9		High	High	High	High	High	High	High	High	High	n/a	2.13e-05		2.435e-12		88		100
Q8CFI5	Probable proline--tRNA ligase, mitochondrial OS=Mus musculus OX=10090 GN=Pars2 PE=1 SV=2	[R].LLAPYQVCVIPPK.[K]	1xCarbamidomethyl [C8]; 1xTMTpro [K13]; 1xTMTpro [N-Term]	1.875e-05	4.83621e-05	1	1	1	2	Q8CFI5 [366-378]	Q8CFI5 1xCarbamidomethyl [C373]	0	2106.26	0.966	0.149499	0.510145	641.6	664.4	4.26	4.58	641.4	646.2	589.6	641.7	626.7	655.4	698.7	673.6		High	High	High	High	High	High	High	High	High	n/a	2.13e-05		5.796e-06		41		100
Q8CFI5	Probable proline--tRNA ligase, mitochondrial OS=Mus musculus OX=10090 GN=Pars2 PE=1 SV=2	[R].LLAPYQVCVIPPKK.[G]	1xCarbamidomethyl [C8]; 2xTMTpro [K13; K14]; 1xTMTpro [N-Term]	9.45574e-07	4.83621e-05	1	1	1	1	Q8CFI5 [366-379]	Q8CFI5 1xCarbamidomethyl [C373]	1	2538.57	0.94	0.0560654	0.351462	660.5	702.4	4.82	2.55	688.4	662.5	612.4	658.6	716.5	688.7	719.9	686.1		High	High	High	High	High	High	High	High	High	n/a	2.13e-05		1.141e-07		34		100
Q5SWU9	Acetyl-CoA carboxylase 1 OS=Mus musculus OX=10090 GN=Acaca PE=1 SV=1	[R].TDCNHIFLNFVPTVIMDPSK.[I]	1xCarbamidomethyl [C3]; 1xTMTpro [K20]; 1xTMTpro [N-Term]	7.01174e-07	4.83621e-05	1	1	1	1	Q5SWU9 [1467-1486]	Q5SWU9 1xCarbamidomethyl [C1469]	0	2956.56	0.957	0.830992	0.947156	494.9	517.2	13.12	2.05	515.4	463.7	612.9	475.3	518	514	516.4	537.2		High	High	High	High	High	High	High	High	High	n/a	2.13e-05		7.72e-08		45		100
O88736	3-keto-steroid reductase/17-beta-hydroxysteroid dehydrogenase 7 OS=Mus musculus OX=10090 GN=Hsd17b7 PE=1 SV=1	[R].LLAEDDDLHLCLACR.[N]	2xCarbamidomethyl [C11; C14]; 1xTMTpro [N-Term]	8.24332e-08	4.83621e-05	1	1	1	1	O88736 [22-36]	O88736 2xCarbamidomethyl [C32; C35]	0	2118.06	1.067	0.249009	0.619656	728.5	683	4.38	5.83	689.6	767.7	728.7	728.3	753.6	664.2	671.5	694.6		High	High	High	High	High	High	High	High	High	n/a	2.13e-05		4.686e-09		66		100
Q9WTX6	Cullin-1 OS=Mus musculus OX=10090 GN=Cul1 PE=1 SV=1	[K].LKQACGFEYTSK.[L]	1xCarbamidomethyl [C5]; 2xTMTpro [K2; K12]; 1xTMTpro [N-Term]	8.02696e-08	4.83621e-05	1	1	1	1	Q9WTX6 [492-503]	Q9WTX6 1xCarbamidomethyl [C496]	1	2344.32	0.872	0.940521	0.983579	814.8	934	47.35	5.32	849.7	683.3	1715.6	781.3	930.3	937.7	924.4	1032		High	High	High	High	High	High	High	High	High	n/a	2.13e-05		4.549e-09		19		100
Q9QZD8	Mitochondrial dicarboxylate carrier OS=Mus musculus OX=10090 GN=Slc25a10 PE=1 SV=2	[R].TDGFLALYNGLSASLCR.[Q]	1xCarbamidomethyl [C16]; 1xTMTpro [N-Term]	1.52549e-06	4.83621e-05	1	1	1	1	Q9QZD8 [53-69]	Q9QZD8 1xCarbamidomethyl [C68]	0	2162.12	1.14	0.034872	0.294758	395.8	347.3	6.95	3.17	361.9	380.6	420.9	411.6	363.1	339.6	341.2	353.5		High	High	High	High	High	High	High	High	High	Low	2.13e-05	0.9569	2.129e-07	1	45	1.62	100
P13595	Neural cell adhesion molecule 1 OS=Mus musculus OX=10090 GN=Ncam1 PE=1 SV=3	[K].TDEGTYRCEGR.[I]	1xCarbamidomethyl [C8]; 1xTMTpro [N-Term]	0.000113782	4.83621e-05	1	1	1	1	P13595 [182-192]	P13595 1xCarbamidomethyl [C189]	1	1647.77	0.945	0.944576	0.984597	115.8	122.5	23.11	10.67	155.3	135.3	99.1	98.1	117.9	104.8	127.3	134.8		High	High	High	High	High	High	High	High	High	Low	2.13e-05	0.9689	7.265e-05	1	19	0.92	100
Q9JLV5	Cullin-3 OS=Mus musculus OX=10090 GN=Cul3 PE=1 SV=1	[K].LKTECGCQFTSK.[L]	2xCarbamidomethyl [C5; C7]; 2xTMTpro [K2; K12]; 1xTMTpro [N-Term]	5.49468e-08	4.83621e-05	1	1	1	1	Q9JLV5 [458-469]	Q9JLV5 2xCarbamidomethyl [C462; C464]	1	2371.29	1.061	0.347154	0.70576	934	880.5	15.43	14.81	1091.3	801.5	1043.4	836.2	661.4	870.1	891.1	946		High	High	High	High	High	High	High	High	High	n/a	2.13e-05		2.765e-09		39		100
P50396	Rab GDP dissociation inhibitor alpha OS=Mus musculus OX=10090 GN=Gdi1 PE=1 SV=3	[R].TDDYLDQPCLETINR.[I]	1xCarbamidomethyl [C9]; 1xTMTpro [N-Term]	2.75168e-08	4.83621e-05	1	1	1	4	P50396 [194-208]	P50396 1xCarbamidomethyl [C202]	0	2157.05	1.185	0.0760578	0.394	2569.6	2169	9.38	16.91	2944.2	2637.3	2371.9	2503.7	1590.6	2115	2224.3	2414.9		High	High	High	High	High	High	High	High	High	n/a	2.13e-05		1.122e-09		49		100
Q8K3E5	Jouberin OS=Mus musculus OX=10090 GN=Ahi1 PE=1 SV=2	[R].ILAAACASR.[D]	1xCarbamidomethyl [C6]; 1xTMTpro [N-Term]	6.75483e-05	4.83621e-05	1	1	1	2	Q8K3E5 [473-481]	Q8K3E5 1xCarbamidomethyl [C478]	0	1236.71	1.554	0.127925	0.479413	2180.3	1402.9	5.61	35.43	2281.8	2306.3	2080.7	2083.3	2507.1	1435.4	1371.2	1253.6		High	High	High	High	High	High	High	High	High	n/a	2.13e-05		3.345e-05		30		100
Q8CFI5	Probable proline--tRNA ligase, mitochondrial OS=Mus musculus OX=10090 GN=Pars2 PE=1 SV=2	[R].ILAAAIEVLSTEDCIR.[W]	1xCarbamidomethyl [C14]; 1xTMTpro [N-Term]	3.33778e-06	4.83621e-05	1	1	1	1	Q8CFI5 [347-362]	Q8CFI5 1xCarbamidomethyl [C360]	0	2078.15	1.095	0.0755289	0.393248	366.3	334.5	5.06	2.99	332.2	370.6	370.3	362.3	346.1	328	325.4	341.2		High	High	High	High	High	High	High	High	High	n/a	2.13e-05		5.93e-07		45		100
P46061	Ran GTPase-activating protein 1 OS=Mus musculus OX=10090 GN=Rangap1 PE=1 SV=2	[K].ILAAALTECHR.[K]	1xCarbamidomethyl [C9]; 1xTMTpro [N-Term]	3.42746e-06	4.83621e-05	1	1	1	2	P46061 [161-171]	P46061 1xCarbamidomethyl [C169]	0	1558.87	1.051	0.0885612	0.418341	866.5	824.5	3.25	2.91	837.4	897.7	849.9	883.6	806.9	861.9	816.2	832.8		High	High	High	High	High	High	High	High	High	n/a	2.13e-05		6.159e-07		60		100
Q61598	Rab GDP dissociation inhibitor beta OS=Mus musculus OX=10090 GN=Gdi2 PE=1 SV=1	[R].TDDYLDQPCCETINR.[I]	2xCarbamidomethyl [C9; C10]; 1xTMTpro [N-Term]	7.7325e-06	4.83621e-05	1	1	1	1	Q61598 [194-208]	Q61598 2xCarbamidomethyl [C202; C203]	0	2203.99	1.336	0.0104035	0.190686	274.9	205.8	6.82	12.72	280.6	255.8	269.3	300.4	171.6	197.3	214.6	232.5		High	High	High	High	High	High	High	High	High	n/a	2.13e-05		1.789e-06		43		100
Q5HZI2	C2 calcium-dependent domain-containing protein 4C OS=Mus musculus OX=10090 GN=C2cd4c PE=1 SV=1	[R].LLAAEGLYDRPCDAR.[S]	1xCarbamidomethyl [C12]; 1xTMTpro [N-Term]	1.98951e-06	4.83621e-05	1	1	1	1	Q5HZI2 [324-338]	Q5HZI2 1xCarbamidomethyl [C335]	1	2024.06	1.044	0.656574	0.880914	852.8	817.2	21.09	15.28	858.4	950.4	559.1	847.2	730.2	787.9	1029.5	847.5		High	High	High	High	High	High	High	High	High	n/a	2.13e-05		3.02e-07		22		100
Q922R1	Phagosome assembly factor 1 OS=Mus musculus OX=10090 GN=Phaf1 PE=1 SV=2	[R].LLAAGCGPGVLADAK.[M]	1xCarbamidomethyl [C6]; 1xTMTpro [K15]; 1xTMTpro [N-Term]	3.137e-07	4.83621e-05	1	1	1	5	Q922R1 [217-231]	Q922R1 1xCarbamidomethyl [C222]	0	2021.17	1.054	0.800855	0.936791	3455.4	3278.4	9.12	5.47	3596.6	3486.9	2907.4	3424.1	3114	3194.6	3518.5	3364.4		High	High	High	High	High	High	High	High	High	High	2.13e-05	0.0003185	2.699e-08	0.0003585	58	3.1	100
Q9DBE0	Cysteine sulfinic acid decarboxylase OS=Mus musculus OX=10090 GN=Csad PE=1 SV=1	[K].LLAAGLQCSALLLR.[D]	1xCarbamidomethyl [C8]; 1xTMTpro [N-Term]	4.07368e-08	4.83621e-05	1	1	1	2	Q9DBE0 [306-319]	Q9DBE0 1xCarbamidomethyl [C313]	0	1803.08	1.04	0.853162	0.954709	1335.9	1284.5	16.77	11.84	1079.2	1304.6	1627.6	1367.9	1499.2	1376.8	1170.1	1198.3		High	High	High	High	High	High	High	High	High	n/a	2.13e-05		1.874e-09		24		100
E9PVA8	eIF-2-alpha kinase activator GCN1 OS=Mus musculus OX=10090 GN=Gcn1 PE=1 SV=1	[K].LIAALSTPSQQVQESVASCLPPLVPAVK.[E]	1xCarbamidomethyl [C19]; 1xTMTpro [K28]; 1xTMTpro [N-Term]	1.75375e-06	4.83621e-05	1	1	1	3	E9PVA8 [1344-1371]	E9PVA8 1xCarbamidomethyl [C1362]	0	3512.01	0.986	0.340195	0.702156	1200.8	1217.5	9.25	1.92	1235.6	1241.4	1010.3	1167.1	1224.1	1206.6	1258.5	1210.8		High	High	High	High	High	High	High	High	High	High	2.13e-05	0.0007911	2.547e-07	0.04437	66	2.88	100
Q6PB66	Leucine-rich PPR motif-containing protein, mitochondrial OS=Mus musculus OX=10090 GN=Lrpprc PE=1 SV=2	[R].LIAAYCNVGDIEGASK.[I]	1xCarbamidomethyl [C6]; 1xTMTpro [K16]; 1xTMTpro [N-Term]	3.24303e-07	4.83621e-05	1	1	1	1	Q6PB66 [202-217]	Q6PB66 1xCarbamidomethyl [C207]	0	2289.24	1.018	0.683903	0.89177	776.1	762.4	3.7	3.74	741.6	763.8	788.6	807.3	805.4	760	736.5	764.8		High	High	High	High	High	High	High	High	High	n/a	2.13e-05		2.806e-08		61		100
P43406	Integrin alpha-V OS=Mus musculus OX=10090 GN=Itgav PE=1 SV=2	[K].ILACAPLYHWR.[T]	1xCarbamidomethyl [C4]; 1xTMTpro [N-Term]	4.16153e-05	4.83621e-05	1	1	1	2	P43406 [135-145]	P43406 1xCarbamidomethyl [C138]	0	1703.94	1.176	0.321589	0.685871	633.8	539	14.44	4.73	599.5	671	485	669.9	587	531.1	544.4	533.6		High	High	High	High	High	High	High	High	High	n/a	2.13e-05		1.698e-05		26		100
Q9Z2I9	Succinate--CoA ligase [ADP-forming] subunit beta, mitochondrial OS=Mus musculus OX=10090 GN=Sucla2 PE=1 SV=2	[K].ILACDDLDEAAK.[M]	1xCarbamidomethyl [C4]; 1xTMTpro [K12]; 1xTMTpro [N-Term]	9.10285e-05	4.83621e-05	1	1	1	2	Q9Z2I9 [427-438]	Q9Z2I9 1xCarbamidomethyl [C430]	0	1942.04	0.808	0.00277127	0.132572	1099.6	1360.4	6.9	5.38	1102.1	1158.6	980.4	1097.2	1429.4	1408.5	1314	1278		High	High	High	High	High	High	High	High	High	High	2.13e-05	0.0003185	5.155e-05	8.597e-05	44	2.41	100
P52503	NADH dehydrogenase [ubiquinone] iron-sulfur protein 6, mitochondrial OS=Mus musculus OX=10090 GN=Ndufs6 PE=1 SV=2	[R].IIACDGGGGALGHPK.[V]	1xCarbamidomethyl [C4]; 1xTMTpro [K15]; 1xTMTpro [N-Term]	1.59788e-09	4.83621e-05	1	1	1	1	P52503 [76-90]	P52503 1xCarbamidomethyl [C79]	0	2031.13	1.116	0.402139	0.742197	1383	1239.5	11.39	2.4	1418.5	1349.2	1101	1417.5	1271.9	1223.4	1255.7	1206.6		High	High	High	High	High	High	High	High	High	n/a	2.13e-05		2.723e-11		63		100
Q9Z1Q2	Phosphatidylserine lipase ABHD16A OS=Mus musculus OX=10090 GN=Abhd16a PE=1 SV=3	[K].LLACDGNEIDTMFVDRR.[G]	1xCarbamidomethyl [C4]; 1xTMTpro [N-Term]	3.90202e-10	4.83621e-05	1	1	1	2	Q9Z1Q2 [255-271]	Q9Z1Q2 1xCarbamidomethyl [C258]	1	2329.16	1.087	0.618843	0.862409	930.7	856.3	13.41	14.78	862.6	1004.1	760.4	1016.3	988.3	961.7	762.5	746.8		High	High	High	High	High	High	High	High	High	n/a	2.13e-05		4.301e-12		51		100
P70206	Plexin-A1 OS=Mus musculus OX=10090 GN=Plxna1 PE=1 SV=1	[R].LLACGSASQGICQFLR.[L]	2xCarbamidomethyl [C4; C12]; 1xTMTpro [N-Term]	1.97635e-06	4.83621e-05	1	1	1	1	P70206 [125-140]	P70206 2xCarbamidomethyl [C128; C136]	0	2085.09	1.164	0.154093	0.514791	675.7	580.3	9.63	9.75	654.5	732.2	583.2	697.5	675.7	558	603.4	548.2		High	High	High	High	High	High	High	High	High	n/a	2.13e-05		3e-07		37		100
Q99104	Unconventional myosin-Va OS=Mus musculus OX=10090 GN=Myo5a PE=1 SV=2	[K].TDDDAEAICSMCNALTTAQIVK.[V]	2xCarbamidomethyl [C9; C12]; 1xTMTpro [K22]; 1xTMTpro [N-Term]	4.81892e-09	4.83621e-05	1	1	1	2	Q99104 [1758-1779]	Q99104 2xCarbamidomethyl [C1766; C1769]	0	3035.5	0.908	0.142258	0.500157	835.7	920.2	2.14	6.65	838.2	815.8	859.3	833.1	809.2	906.3	935.4	934.4		High	High	High	High	High	High	High	High	High	n/a	2.13e-05		1.152e-10		64		100
P42859	Huntingtin OS=Mus musculus OX=10090 GN=Htt PE=1 SV=2	[R].LLACLQNVHK.[V]	1xCarbamidomethyl [C4]; 1xTMTpro [K10]; 1xTMTpro [N-Term]	1.57114e-07	4.83621e-05	1	1	1	4	P42859 [3106-3115]	P42859 1xCarbamidomethyl [C3109]	0	1804.08	0.953	0.78726	0.931946	2307.6	2421.3	4.03	16.63	2244.9	2212.3	2401.7	2372.1	1720	2515.7	2330.4	2517.2		High	High	High	High	High	High	High	High	High	n/a	2.13e-05		1.091e-08		46		100
Q8BHH1	Aquaporin-11 OS=Mus musculus OX=10090 GN=Aqp11 PE=1 SV=1	[R].ILACRNPIHTDMSK.[A]	1xCarbamidomethyl [C4]; 1xTMTpro [K14]; 1xTMTpro [N-Term]	2.35346e-05	4.83621e-05	1	1	1	1	Q8BHH1 [152-165]	Q8BHH1 1xCarbamidomethyl [C155]	1	2264.25	1.108	0.177597	0.544263	1080.8	975.7	8.95	5.43	1163.1	1079	934.1	1082.7	1043	973.7	977.7	913.2		High	High	High	High	High	High	High	High	High	n/a	3.58e-05		8.201e-05		18		100
O35710	Nocturnin OS=Mus musculus OX=10090 GN=Noct PE=1 SV=3	[R].TDCSSSHSPIR.[V]	1xCarbamidomethyl [C3]; 1xTMTpro [N-Term]	1.91183e-06	4.83621e-05	1	1	1	1	O35710 [132-142]	O35710 1xCarbamidomethyl [C134]	0	1550.76	1.028	0.67536	0.888066	394	383.2	6.33	4.62	398.8	410.7	353.7	389.3	358.3	377.5	399.4	389		High	High	High	High	High	High	High	High	High	n/a	2.13e-05		2.856e-07		65		100
Q6P4S6	Serine/threonine-protein kinase SIK3 OS=Mus musculus OX=10090 GN=Sik3 PE=1 SV=4	[R].LIAECQQLK.[E]	1xCarbamidomethyl [C5]; 1xTMTpro [K9]; 1xTMTpro [N-Term]	8.48036e-06	4.83621e-05	1	1	1	4	Q6P4S6 [329-337]	Q6P4S6 1xCarbamidomethyl [C333]	0	1711.01	1.118	0.00638175	0.165081	2156.4	1928.4	3.61	3.63	2270.8	2151.2	2081.7	2161.7	2053.2	1905.5	1951.6	1900.1		High	High	High	High	High	High	High	High	High	n/a	2.13e-05		2.024e-06		48		100
Q62277	Synaptophysin OS=Mus musculus OX=10090 GN=Syp PE=1 SV=2	[R].LHQVYFDAPSCVK.[G]	1xCarbamidomethyl [C11]; 1xTMTpro [K13]; 1xTMTpro [N-Term]	7.7783e-09	4.83621e-05	1	1	1	33	Q62277 [77-89]	Q62277 1xCarbamidomethyl [C87]	0	2172.18	1.005	0.722025	0.9064	20790.6	20697	15.39	14.54	22549.9	20294.4	15534.4	21298.9	17255.7	19428.9	24156.4	22047.9		High	High	High	High	High	High	High	High	High	High	2.13e-05	0.0003185	2.148e-10	0.0009442	69	1.62	100
G5E829	Plasma membrane calcium-transporting ATPase 1 OS=Mus musculus OX=10090 GN=Atp2b1 PE=1 SV=1	[K].TECALLGFLLDLK.[R]	1xCarbamidomethyl [C3]; 1xTMTpro [K13]; 1xTMTpro [N-Term]	2.08115e-08	4.83621e-05	1	1	1	2	G5E829 [545-557]	G5E829 1xCarbamidomethyl [C547]	0	2101.22	0.997	0.926821	0.979807	1217.2	1221	7.24	17.12	1198.1	1058.4	1241.2	1236.6	973.5	1090.6	1391.7	1367.1		High	High	High	High	High	High	High	High	High	n/a	2.13e-05		7.798e-10		68		100
G5E829	Plasma membrane calcium-transporting ATPase 1 OS=Mus musculus OX=10090 GN=Atp2b1 PE=1 SV=1	[K].TECALLGFLLDLKR.[D]	1xCarbamidomethyl [C3]; 1xTMTpro [K13]; 1xTMTpro [N-Term]	2.50707e-08	4.83621e-05	1	1	1	2	G5E829 [545-558]	G5E829 1xCarbamidomethyl [C547]	1	2257.32	0.883	0.390799	0.734243	2050.8	2323	6.79	17.96	2105.3	1922.7	1997.7	2246.2	1827.2	2080.4	2691.4	2593.8		High	High	High	High	High	High	High	High	High	n/a	2.13e-05		9.895e-10		50		100
P63037	DnaJ homolog subfamily A member 1 OS=Mus musculus OX=10090 GN=Dnaja1 PE=1 SV=1	[R].IHQIGPGMVQQIQSVCMECQGHGER.[I]	2xCarbamidomethyl [C16; C19]; 1xTMTpro [N-Term]	6.32026e-12	4.83621e-05	1	1	1	1	P63037 [162-186]	P63037 2xCarbamidomethyl [C177; C180]	0	3183.52	1.063	0.252034	0.623019	258.9	243.6	7.79	4.68	253.7	287.6	239.3	264.2	261.9	245.6	234.8	241.7		High	High	High	High	High	High	High	High	High	n/a	2.13e-05		1.972e-14		72		100
Q5DQR4	Syntaxin-binding protein 5-like OS=Mus musculus OX=10090 GN=Stxbp5l PE=1 SV=1	[R].TFCFTNEGQALYLVSPTEIQR.[L]	1xCarbamidomethyl [C3]; 1xTMTpro [N-Term]	1.23286e-09	4.83621e-05	1	1	1	3	Q5DQR4 [1029-1049]	Q5DQR4 1xCarbamidomethyl [C1031]	0	2778.41	1.046	0.0778291	0.398371	711.8	680.3	4.24	2.24	691.9	732.2	686.7	748.6	679.7	655.4	680.8	691.1		High	High	High	High	High	High	High	High	High	n/a	2.13e-05		1.929e-11		76		100
Q8QZV4	Serine/threonine-protein kinase 32C OS=Mus musculus OX=10090 GN=Stk32c PE=1 SV=1	[R].LHCDPTFELEEMILESR.[P]	1xCarbamidomethyl [C3]; 1xTMTpro [N-Term]	5.51398e-10	4.83621e-05	1	1	1	1	Q8QZV4 [378-394]	Q8QZV4 1xCarbamidomethyl [C380]	0	2423.19	0.874	0.0609972	0.363026	502.2	574.9	11.08	4.9	502.2	546.8	416.5	502.2	574.4	575.3	610.7	541.6		High	High	High	High	High	High	High	High	High	n/a	2.13e-05		6.776e-12		69		100
E9PY46	Intraflagellar transport protein 140 homolog OS=Mus musculus OX=10090 GN=Ift140 PE=1 SV=1	[R].IHCFQGNIQK.[A]	1xCarbamidomethyl [C3]; 1xTMTpro [K10]; 1xTMTpro [N-Term]	1.24163e-06	4.83621e-05	1	1	1	1	E9PY46 [991-1000]	E9PY46 1xCarbamidomethyl [C993]	0	1853.03	1.181	0.0108054	0.193512	471.7	399.4	0.68	6.3	470.8	475.2	472.7	467.6	407.3	418.9	361.4	391.7		High	High	High	High	High	High	High	High	High	n/a	2.13e-05		1.632e-07		39		100
Q9CY34	NEDD8-conjugating enzyme UBE2F OS=Mus musculus OX=10090 GN=Ube2f PE=1 SV=1	[K].LHCFQLTVSPDEGYYQGGK.[F]	1xCarbamidomethyl [C3]; 1xTMTpro [K19]; 1xTMTpro [N-Term]	1.07933e-09	4.83621e-05	1	1	1	2	Q9CY34 [62-80]	Q9CY34 1xCarbamidomethyl [C64]	0	2807.43	0.839	0.00225432	0.122085	2003.7	2389.5	3.79	4.85	2123.8	1944.8	2020.9	1986.6	2236.9	2329.7	2488.7	2450.8		High	High	High	High	High	High	High	High	High	n/a	2.13e-05		1.631e-11		63		100
Q9ES56	Trafficking protein particle complex subunit 4 OS=Mus musculus OX=10090 GN=Trappc4 PE=1 SV=1	[K].LHCFQTLTGIK.[F]	1xCarbamidomethyl [C3]; 1xTMTpro [K11]; 1xTMTpro [N-Term]	1.18521e-06	4.83621e-05	1	1	1	4	Q9ES56 [144-154]	Q9ES56 1xCarbamidomethyl [C146]	0	1926.11	1.004	0.6889	0.893781	2009.2	2002	9.14	1.13	1870.9	1989.4	2313.1	2029.1	1995.5	2033.6	2008.6	1980.1		High	High	High	High	High	High	High	High	High	High	2.13e-05	0.0003185	1.536e-07	0.02114	55	2.32	100
Q8C7R4	Ubiquitin-like modifier-activating enzyme 6 OS=Mus musculus OX=10090 GN=Uba6 PE=1 SV=1	[K].TFCFEPLESQIK.[H]	1xCarbamidomethyl [C3]; 1xTMTpro [K12]; 1xTMTpro [N-Term]	2.8828e-08	4.83621e-05	1	1	1	2	Q8C7R4 [296-307]	Q8C7R4 1xCarbamidomethyl [C298]	0	2107.14	0.767	0.0764408	0.395324	1836.3	2394.6	12.95	12.71	1931.3	1669.1	2220	1746	1887	2325	2466.2	2542.5		High	High	High	High	High	High	High	High	High	n/a	2.13e-05		1.185e-09		76		100
Q8K400	Syntaxin-binding protein 5 OS=Mus musculus OX=10090 GN=Stxbp5 PE=1 SV=3	[R].TFCFANNGQALYLVSPTEIQR.[L]	1xCarbamidomethyl [C3]; 1xTMTpro [N-Term]	1.76856e-10	4.83621e-05	1	1	1	4	Q8K400 [996-1016]	Q8K400 1xCarbamidomethyl [C998]	0	2733.4	1.001	0.923257	0.979559	3054.7	3052.9	6.34	2.14	2785.3	3018.9	3248	3090.8	3048.8	3057.1	3109.7	2953.4		High	High	High	High	High	High	High	High	High	n/a	2.13e-05		1.523e-12		75		100
Q62261; P15508	Spectrin beta chain, non-erythrocytic 1 OS=Mus musculus OX=10090 GN=Sptbn1 PE=1 SV=2 Spectrin beta chain, erythrocytic OS=Mus musculus OX=10090 GN=Sptb PE=1 SV=4	[R].IHCLENVDK.[A]	1xCarbamidomethyl [C3]; 1xTMTpro [K9]; 1xTMTpro [N-Term]	5.13349e-06	4.83621e-05	2	2	1	5	Q62261 [110-118]; P15508 [110-118]	Q62261 1xCarbamidomethyl [C112]; P15508 1xCarbamidomethyl [C112]	0	1735.97	0.972	0.84047	0.95041	3030.6	3116.7	3.37	5.84	3142.3	2995.9	2902.7	3065.6	2790.4	3144.4	3089.2	3182.5	Shared	High	High	High	High	High	High	High	High	High	n/a	2.13e-05		1.048e-06		39		100
Q6VNB8	WD repeat and FYVE domain-containing protein 3 OS=Mus musculus OX=10090 GN=Wdfy3 PE=1 SV=1	[K].TFAWGYADLSCR.[L]	1xCarbamidomethyl [C11]; 1xTMTpro [N-Term]	2.38854e-07	4.83621e-05	1	1	1	2	Q6VNB8 [3031-3042]	Q6VNB8 1xCarbamidomethyl [C3041]	0	1750.85	1.179	0.00815226	0.177799	1506.5	1277.2	6.74	6.38	1416	1592.5	1425.1	1600.5	1313.1	1324.3	1150.2	1242.4		High	High	High	High	High	High	High	High	High	Medium	2.13e-05	0.01762	1.894e-08	0.2779	47	2.12	100
Q9D0A3	Arpin OS=Mus musculus OX=10090 GN=Arpin PE=1 SV=1	[R].YYVLYIQPSCIHR.[R]	1xCarbamidomethyl [C10]; 1xTMTpro [N-Term]	5.16757e-06	4.83621e-05	1	1	1	1	Q9D0A3 [59-71]	Q9D0A3 1xCarbamidomethyl [C68]	0	2016.07	1.07	0.317698	0.682966	433.9	405.5	8.23	4.3	439.5	465.7	381.3	428.4	427.5	384.7	404.8	406.2		High	High	High	High	High	High	High	High	High	n/a	2.13e-05		1.054e-06		62		100
Q9D7P6	Iron-sulfur cluster assembly enzyme ISCU, mitochondrial OS=Mus musculus OX=10090 GN=Iscu PE=1 SV=1	[K].LHCSMLAEDAIK.[A]	1xCarbamidomethyl [C3]; 1xTMTpro [K12]; 1xTMTpro [N-Term]	4.89722e-07	4.83621e-05	1	1	1	1	Q9D7P6 [137-148]	Q9D7P6 1xCarbamidomethyl [C139]	0	1996.09	1.025	0.483289	0.791218	466.9	455.5	4.4	4.13	480.6	437.6	478.4	455.7	427.8	460.8	450.4	471.6		High	High	High	High	High	High	High	High	High	n/a	2.13e-05		4.838e-08		40		100
Q6PDS3	NAD(+) hydrolase SARM1 OS=Mus musculus OX=10090 GN=Sarm1 PE=1 SV=1	[K].TFASYATCDR.[S]	1xCarbamidomethyl [C8]; 1xTMTpro [N-Term]	8.42464e-06	4.83621e-05	1	1	1	1	Q6PDS3 [475-484]	Q6PDS3 1xCarbamidomethyl [C482]	0	1495.72	1.112	0.128821	0.480555	322	289.6	9.18	5.52	291.7	325	319.1	364.1	280.6	290.8	288.4	317.9		High	High	High	High	High	High	High	High	High	n/a	2.13e-05		2.008e-06		35		100
Q8BG94	COMM domain-containing protein 7 OS=Mus musculus OX=10090 GN=Commd7 PE=1 SV=1	[R].LHCTQDPVPEAVR.[G]	1xCarbamidomethyl [C3]; 1xTMTpro [N-Term]	2.41173e-06	4.83621e-05	1	1	1	1	Q8BG94 [4-16]	Q8BG94 1xCarbamidomethyl [C6]	0	1825.95	1.145	0.0495463	0.335092	384.4	335.8	9.22	4.29	376.8	440.6	355.8	392.2	362.2	338	329.6	333.5		High	High	High	High	High	High	High	High	High	n/a	2.13e-05		3.895e-07		44		100
Q99JP0	Mitogen-activated protein kinase kinase kinase kinase 3 OS=Mus musculus OX=10090 GN=Map4k3 PE=1 SV=4	[K].IHCATSWINPDTR.[D]	1xCarbamidomethyl [C3]; 1xTMTpro [N-Term]	4.93369e-06	4.83621e-05	1	1	1	1	Q99JP0 [559-571]	Q99JP0 1xCarbamidomethyl [C561]	0	1874.95	1.137	0.513072	0.808587	1104.9	971.4	16.43	5.93	1075.4	1175.2	795.2	1135.2	1010.2	1019.9	902.9	934.1		High	High	High	High	High	High	High	High	High	n/a	2.13e-05		9.934e-07		58		100
P39054	Dynamin-2 OS=Mus musculus OX=10090 GN=Dnm2 PE=1 SV=2	[K].TEYAEFLHCK.[S]	1xCarbamidomethyl [C9]; 1xTMTpro [K10]; 1xTMTpro [N-Term]	1.66735e-05	4.83621e-05	1	1	1	1	P39054 [78-87]	P39054 1xCarbamidomethyl [C86]	0	1906	0.9	0.476046	0.786894	441.3	490.1	16.39	6.49	494.3	393.9	536.5	386.9	439.1	504.4	476.3	505.7		High	High	High	High	High	High	High	High	High	n/a	2.13e-05		4.972e-06		25		100
Q8K1M6	Dynamin-1-like protein OS=Mus musculus OX=10090 GN=Dnm1l PE=1 SV=2	[K].LHDAIVEVVTCLLR.[K]	1xCarbamidomethyl [C11]; 1xTMTpro [N-Term]	2.55759e-08	4.83621e-05	1	1	1	2	Q8K1M6 [466-479]	Q8K1M6 1xCarbamidomethyl [C476]	0	1942.11	0.985	0.559056	0.834942	259.6	263.5	7.27	2.6	232.2	275.7	265.4	254	259.1	268.1	269.2	255.2		High	High	High	High	High	High	High	High	High	n/a	2.13e-05		1.016e-09		94		100
Q8K1M6	Dynamin-1-like protein OS=Mus musculus OX=10090 GN=Dnm1l PE=1 SV=2	[K].LHDAIVEVVTCLLRK.[R]	1xCarbamidomethyl [C11]; 1xTMTpro [K15]; 1xTMTpro [N-Term]	2.58691e-07	4.83621e-05	1	1	1	4	Q8K1M6 [466-480]	Q8K1M6 1xCarbamidomethyl [C476]	1	2374.41	0.913	0.53171	0.82008	2541.2	2783.1	11.95	5.74	2529.6	2331.1	3064.5	2552.9	2496.7	2765.6	2843.7	2800.6		High	High	High	High	High	High	High	High	High	n/a	2.13e-05		2.086e-08		33		100
Q05816	Fatty acid-binding protein 5 OS=Mus musculus OX=10090 GN=Fabp5 PE=1 SV=3	[K].TETVCTFQDGALVQHQQWDGK.[E]	1xCarbamidomethyl [C5]; 1xTMTpro [K21]; 1xTMTpro [N-Term]	3.25506e-09	4.83621e-05	1	1	1	2	Q05816 [83-103]	Q05816 1xCarbamidomethyl [C87]	0	3056.54	1.142	0.29475	0.662718	1677.2	1469.1	20.27	18.33	1918.5	1447.7	2171.6	1466.2	1185.7	1448.6	1489.9	1851.5		High	High	High	High	High	High	High	High	High	n/a	2.13e-05		6.889e-11		77		100
Q91YE6	Importin-9 OS=Mus musculus OX=10090 GN=Ipo9 PE=1 SV=3	[K].IHEACMLALGSVK.[S]	1xCarbamidomethyl [C5]; 1xTMTpro [K13]; 1xTMTpro [N-Term]	1.92456e-06	4.83621e-05	1	1	1	2	Q91YE6 [446-458]	Q91YE6 1xCarbamidomethyl [C450]	0	2037.15	0.914	0.84336	0.951233	1776.5	1943.4	17.45	1.67	1721.8	1754.7	2427.6	1798.7	1932.5	1954.4	1898.1	1973.9		High	High	High	High	High	High	High	High	High	n/a	2.13e-05		2.9e-07		38		100
Q68FD5	Clathrin heavy chain 1 OS=Mus musculus OX=10090 GN=Cltc PE=1 SV=3	[R].IHEGCEEPATHNALAK.[I]	1xCarbamidomethyl [C5]; 1xTMTpro [K16]; 1xTMTpro [N-Term]	6.08362e-13	4.83621e-05	1	1	1	6	Q68FD5 [866-881]	Q68FD5 1xCarbamidomethyl [C870]	0	2385.25	1.037	0.124682	0.472306	4115.3	3968.4	6.06	7.11	4557.4	4037.6	3999.4	4194.4	3450.3	3940.7	3996.3	4041.8		High	High	High	High	High	High	High	High	High	n/a	2.13e-05		1.273e-15		53		100
Q80TL0	Protein phosphatase 1E OS=Mus musculus OX=10090 GN=Ppm1e PE=1 SV=2	[K].LHEICCSWVK.[D]	2xCarbamidomethyl [C5; C6]; 1xTMTpro [K10]; 1xTMTpro [N-Term]	1.30425e-07	4.83621e-05	1	1	1	3	Q80TL0 [206-215]	Q80TL0 2xCarbamidomethyl [C210; C211]	0	1940.04	0.963	0.331777	0.694402	2704.7	2807.9	5.75	7.88	2712	2422.7	2758.4	2697.4	2796.3	2511.5	2819.5	3049		High	High	High	High	High	High	High	High	High	n/a	2.13e-05		8.554e-09		61		100
Q8BYA0	Tubulin-specific chaperone D OS=Mus musculus OX=10090 GN=Tbcd PE=1 SV=1	[R].TEPVLIEAHICER.[V]	1xCarbamidomethyl [C11]; 1xTMTpro [N-Term]	2.74643e-07	4.83621e-05	1	1	1	2	Q8BYA0 [892-904]	Q8BYA0 1xCarbamidomethyl [C902]	0	1871	1.013	0.887408	0.969115	699.7	691.1	5.92	5.73	655.1	724.3	744.2	676	761.1	703.5	678.9	672.7		High	High	High	High	High	High	High	High	High	n/a	2.13e-05		2.263e-08		59		100
P62077	Mitochondrial import inner membrane translocase subunit Tim8 B OS=Mus musculus OX=10090 GN=Timm8b PE=1 SV=1	[R].TENCLSSCVDRFIDTTLAITGR.[F]	2xCarbamidomethyl [C4; C8]; 1xTMTpro [N-Term]	1.18044e-07	4.83621e-05	1	1	1	1	P62077 [52-73]	P62077 2xCarbamidomethyl [C55; C59]	1	2833.41	0.856	0.0576641	0.356272	1527.5	1783.9	6.7	8.79	1522	1412.7	1663.7	1533.1	1555.6	1709.5	1889.8	1861.6		High	High	High	High	High	High	High	High	High	Low	2.13e-05	0.8373	7.525e-09	1	39	3.72	100
P62077	Mitochondrial import inner membrane translocase subunit Tim8 B OS=Mus musculus OX=10090 GN=Timm8b PE=1 SV=1	[R].TENCLSSCVDR.[F]	2xCarbamidomethyl [C4; C8]; 1xTMTpro [N-Term]	2.56977e-07	4.83621e-05	1	1	1	1	P62077 [52-62]	P62077 2xCarbamidomethyl [C55; C59]	0	1644.76	1.052	0.216099	0.586872	439.9	418.3	6.11	5.26	429.3	417.6	479.4	450.7	398.5	404.8	432.3	444.9		High	High	High	High	High	High	High	High	High	n/a	2.13e-05		2.073e-08		40		100
Q08274	Dystrophia myotonica WD repeat-containing protein OS=Mus musculus OX=10090 GN=Dmwd PE=1 SV=3	[R].IHEVPLLEPLVCK.[K]	1xCarbamidomethyl [C12]; 1xTMTpro [K13]; 1xTMTpro [N-Term]	2.67435e-07	4.83621e-05	1	1	1	3	Q08274 [578-590]	Q08274 1xCarbamidomethyl [C589]	0	2155.28	1.083	0.0819829	0.407353	1905	1758.7	4.72	4.4	1928.6	1932.9	1743.9	1881.7	1644.3	1750.9	1829.3	1766.5		High	High	High	High	High	High	High	High	High	n/a	2.13e-05		2.196e-08		58		100
Q9R062	Glycogenin-1 OS=Mus musculus OX=10090 GN=Gyg1 PE=1 SV=3	[K].LHCWSLTQYSK.[C]	1xCarbamidomethyl [C3]; 1xTMTpro [K11]; 1xTMTpro [N-Term]	1.94365e-07	4.83621e-05	1	1	1	3	Q9R062 [87-97]	Q9R062 1xCarbamidomethyl [C89]	0	2031.1	0.676	0.119556	0.465184	2288.5	3385.8	25.66	15.13	2294	2281.8	3632.4	2283.1	3878.5	3647.1	2748.4	3143.2		High	High	High	High	High	High	High	High	High	n/a	2.13e-05		1.443e-08		63		100
P13439	Uridine 5'-monophosphate synthase OS=Mus musculus OX=10090 GN=Umps PE=1 SV=3	[R].LHAVCTLSQMLEILQQQEK.[I]	1xCarbamidomethyl [C5]; 1xTMTpro [K19]; 1xTMTpro [N-Term]	5.96163e-09	4.83621e-05	1	1	1	2	P13439 [170-188]	P13439 1xCarbamidomethyl [C174]	0	2877.58	0.865	0.157833	0.520191	979.3	1131.9	6.73	8.5	989.5	949.8	1100.4	969.2	962	1111.5	1165	1152.7		High	High	High	High	High	High	High	High	High	High	2.13e-05	0.0003185	1.523e-10	0.0007607	44	2.79	100
Q3UHD6	Sorting nexin-27 OS=Mus musculus OX=10090 GN=Snx27 PE=1 SV=2	[K].LHACTEEGQLENQVIAFEWDEMQR.[W]	1xCarbamidomethyl [C4]; 1xTMTpro [N-Term]	6.69301e-07	4.83621e-05	1	1	1	1	Q3UHD6 [451-474]	Q3UHD6 1xCarbamidomethyl [C454]	0	3237.53	1.063	0.0966175	0.430443	289.7	272.6	3.35	4.29	284.6	294.9	275.6	296.1	285.5	259.7	278.9	266.5		High	High	High	High	High	High	High	High	High	n/a	2.13e-05		7.266e-08		26		100
Q8C1B7	Septin-11 OS=Mus musculus OX=10090 GN=Septin11 PE=1 SV=4	[R].IHACLYFIAPTGHSLK.[S]	1xCarbamidomethyl [C4]; 1xTMTpro [K16]; 1xTMTpro [N-Term]	4.66133e-09	4.83621e-05	1	1	1	4	Q8C1B7 [147-162]	Q8C1B7 1xCarbamidomethyl [C150]	0	2436.37	0.748	0.433092	0.762223	1674.9	2239	35.84	4.51	1641.1	1539.5	3045.3	1709.4	2220.6	2265.8	2053.7	2257.6		High	High	High	High	High	High	High	High	High	n/a	2.13e-05		1.099e-10		67		100
Q8BYN5	FSD1-like protein OS=Mus musculus OX=10090 GN=Fsd1l PE=1 SV=2	[K].IGVFCDFDGGQLSFYDAHSK.[Q]	1xCarbamidomethyl [C5]; 1xTMTpro [K20]; 1xTMTpro [N-Term]	8.88473e-09	4.83621e-05	1	1	1	1	Q8BYN5 [429-448]	Q8BYN5 1xCarbamidomethyl [C433]	0	2871.43	1.004	0.687642	0.893369	601	598.5	10.13	2.68	565	605.6	709.5	596.4	626.5	590.3	594.4	602.7		High	High	High	High	High	High	High	High	High	n/a	2.13e-05		2.549e-10		75		100
P63143	Voltage-gated potassium channel subunit beta-1 OS=Mus musculus OX=10090 GN=Kcnab1 PE=1 SV=2	[K].IGVGAMTWSPLACGIISGK.[Y]	1xCarbamidomethyl [C13]; 1xTMTpro [K19]; 1xTMTpro [N-Term]	1.21657e-09	4.83621e-05	1	1	1	2	P63143 [270-288]	P63143 1xCarbamidomethyl [C282]	0	2526.41	0.937	0.365069	0.718088	1051.9	1122.5	7.04	6.11	1171.9	1029.3	1000	1075	1139.9	1195.5	1105.4	1032.3		High	High	High	High	High	High	High	High	High	n/a	2.13e-05		1.902e-11		75		100
P62482	Voltage-gated potassium channel subunit beta-2 OS=Mus musculus OX=10090 GN=Kcnab2 PE=1 SV=1	[K].IGVGAMTWSPLACGIVSGK.[Y]	1xCarbamidomethyl [C13]; 1xTMTpro [K19]; 1xTMTpro [N-Term]	4.56272e-12	4.83621e-05	1	1	1	6	P62482 [236-254]	P62482 1xCarbamidomethyl [C248]	0	2512.39	0.989	0.755821	0.919947	3242	3278.3	4.73	14.39	3513.8	3181.7	3300.6	3184.5	4026.8	3022.9	3000.1	3555.3		High	High	High	High	High	High	High	High	High	n/a	2.13e-05		1.289e-14		105		100
P97382	Voltage-gated potassium channel subunit beta-3 OS=Mus musculus OX=10090 GN=Kcnab3 PE=1 SV=1	[K].IGVGSVTWSPLACGLITSK.[Y]	1xCarbamidomethyl [C13]; 1xTMTpro [K19]; 1xTMTpro [N-Term]	3.26467e-07	4.83621e-05	1	1	1	1	P97382 [122-140]	P97382 1xCarbamidomethyl [C134]	0	2554.46	0.996	0.993546	0.998332	493.4	495.3	7.25	9.62	491.2	495.7	465	551.4	565.5	449.1	489.4	501.3		High	High	High	High	High	High	High	High	High	n/a	2.13e-05		2.849e-08		41		100
Q91W43	Glycine dehydrogenase (decarboxylating), mitochondrial OS=Mus musculus OX=10090 GN=Gldc PE=1 SV=1	[K].TFCIPHGGGGPGMGPIGVK.[K]	1xCarbamidomethyl [C3]; 1xTMTpro [K19]; 1xTMTpro [N-Term]	3.73752e-12	4.83621e-05	1	1	1	2	Q91W43 [760-778]	Q91W43 1xCarbamidomethyl [C762]	0	2447.32	1.018	0.603658	0.856361	1879.9	1847.2	6.97	4.54	2067.7	1907.9	1751.6	1852.3	1751.1	1860.7	1833.8	1955.1		High	High	High	High	High	High	High	High	High	n/a	2.13e-05		9.906e-15		71		100
Q5RJI5	Serine/threonine-protein kinase BRSK1 OS=Mus musculus OX=10090 GN=Brsk1 PE=1 SV=1	[K].LGVHCITGQK.[V]	1xCarbamidomethyl [C5]; 1xTMTpro [K10]; 1xTMTpro [N-Term]	3.40482e-06	4.83621e-05	1	1	1	2	Q5RJI5 [50-59]	Q5RJI5 1xCarbamidomethyl [C54]	0	1721	0.948	0.25316	0.623721	1060.2	1118	7.8	3.1	1053.5	1066.9	934.4	1129.7	1108.5	1056.5	1130.2	1127.7		High	High	High	High	High	High	High	High	High	Low	2.13e-05	0.9641	6.08e-07	1	60	2.23	100
Q9QYS2	Metabotropic glutamate receptor 3 OS=Mus musculus OX=10090 GN=Grm3 PE=1 SV=1	[K].LGVHILDTCSR.[D]	1xCarbamidomethyl [C9]; 1xTMTpro [N-Term]	1.71146e-05	4.83621e-05	1	1	1	4	Q9QYS2 [91-101]	Q9QYS2 1xCarbamidomethyl [C99]	0	1574.86	0.738	0.000153316	0.0625288	1896.3	2570.5	5.03	5.34	1813.7	1998.5	1825.7	1969.6	2763.9	2452.1	2510.5	2631.8		High	High	High	High	High	High	High	High	High	n/a	2.13e-05		5.129e-06		45		100
Q6VVW5	Atrial natriuretic peptide receptor 2 OS=Mus musculus OX=10090 GN=Npr2 PE=1 SV=2	[R].IGVHTGPVCAGVVGLK.[M]	1xCarbamidomethyl [C9]; 1xTMTpro [K16]; 1xTMTpro [N-Term]	1.27454e-09	4.83621e-05	1	1	1	1	Q6VVW5 [958-973]	Q6VVW5 1xCarbamidomethyl [C966]	0	2172.28	1.01	0.879681	0.96636	1256.5	1244	4.51	4.02	1259.1	1214	1349.5	1253.9	1336.6	1231.8	1227.1	1256.2		High	High	High	High	High	High	High	High	High	n/a	2.13e-05		2.028e-11		56		100
Q924Z6	Exportin-6 OS=Mus musculus OX=10090 GN=Xpo6 PE=1 SV=2	[R].LGVLAMSCINELMSK.[N]	1xCarbamidomethyl [C8]; 1xTMTpro [K15]; 1xTMTpro [N-Term]	0.000111259	4.83621e-05	1	1	1	1	Q924Z6 [308-322]	Q924Z6 1xCarbamidomethyl [C315]	0	2274.25	0.966	0.169262	0.532655	348.9	361.3	2.51	2.88	345.4	351.7	364.4	346.1	359.5	376.3	363.1	351.3		High	High	High	High	High	High	High	High	High	n/a	2.13e-05		6.993e-05		20		100
P70175	Disks large homolog 3 OS=Mus musculus OX=10090 GN=Dlg3 PE=1 SV=1	[R].LGVNDCVLR.[V]	1xCarbamidomethyl [C6]; 1xTMTpro [N-Term]	6.27789e-05	4.83621e-05	1	1	1	1	P70175 [195-203]	P70175 1xCarbamidomethyl [C200]	0	1349.75	1.015	0.82977	0.946925	633.4	624.2	8.14	14.07	626.3	640.6	539.1	645.8	487.7	597.7	680.4	651.9		High	High	High	High	High	High	High	High	High	Low	2.13e-05	0.656	3.005e-05	0.9941	43	1.44	100
Q6P9R4	Rho guanine nucleotide exchange factor 18 OS=Mus musculus OX=10090 GN=Arhgef18 PE=1 SV=3	[R].LGVQECILLVTQR.[I]	1xCarbamidomethyl [C6]; 1xTMTpro [N-Term]	1.58162e-07	4.83621e-05	1	1	1	2	Q6P9R4 [628-640]	Q6P9R4 1xCarbamidomethyl [C633]	0	1833.06	0.969	0.35252	0.709509	1239	1278.5	6.42	12.32	1111.3	1259	1291.3	1219.2	1532.6	1338.8	1167	1220.9		High	High	High	High	High	High	High	High	High	n/a	2.13e-05		1.104e-08		47		100
Q6P3A8	2-oxoisovalerate dehydrogenase subunit beta, mitochondrial OS=Mus musculus OX=10090 GN=Bckdhb PE=1 SV=2	[K].LGVSCEVIDLR.[T]	1xCarbamidomethyl [C5]; 1xTMTpro [N-Term]	1.75375e-06	4.83621e-05	1	1	1	3	Q6P3A8 [293-303]	Q6P3A8 1xCarbamidomethyl [C297]	0	1564.87	1.056	0.300776	0.667443	3589	3399	11.08	9.37	3298.2	3668.4	4249.8	3511.4	3564.9	3732.4	3025.4	3240.8		High	High	High	High	High	High	High	High	High	n/a	2.13e-05		2.566e-07		31		100
Q9D967	Magnesium-dependent phosphatase 1 OS=Mus musculus OX=10090 GN=Mdp1 PE=1 SV=1	[R].LGVTCIHIR.[D]	1xCarbamidomethyl [C5]; 1xTMTpro [N-Term]	3.14492e-05	4.83621e-05	1	1	1	2	Q9D967 [134-142]	Q9D967 1xCarbamidomethyl [C138]	0	1372.81	1.235	0.07497	0.391728	1887.5	1528.2	12.16	3.75	1878.7	1960.1	1478.7	1896.3	1434.6	1565.8	1516.7	1539.8		High	High	High	High	High	High	High	High	High	n/a	2.13e-05		1.165e-05		70		100
P49282	Natural resistance-associated macrophage protein 2 OS=Mus musculus OX=10090 GN=Slc11a2 PE=1 SV=2	[R].LGVVTGLHLAEVCHR.[Q]	1xCarbamidomethyl [C13]; 1xTMTpro [N-Term]	2.64376e-05	4.83621e-05	1	1	1	1	P49282 [125-139]	P49282 1xCarbamidomethyl [C137]	0	1965.1	1.168	0.593567	0.851347	163.6	140.1	19.08	4.8	166.5	174	109.8	160.8	150.3	134.2	141.6	138.6		High	High	High	High	High	High	High	High	High	n/a	2.13e-05		9.161e-06		48		100
A2RSQ0	DENN domain-containing protein 5B OS=Mus musculus OX=10090 GN=Dennd5b PE=1 SV=2	[K].TFCHYVNAINTAPR.[N]	1xCarbamidomethyl [C3]; 1xTMTpro [N-Term]	3.18517e-08	4.83621e-05	1	1	1	3	A2RSQ0 [1184-1197]	A2RSQ0 1xCarbamidomethyl [C1186]	0	1968.01	0.983	0.282987	0.65163	2737.2	2783.9	2.06	3.6	2757.6	2784.2	2655.3	2716.9	2932.2	2693.2	2760.8	2807.3		High	High	High	High	High	High	High	High	High	High	2.13e-05	0.0003185	1.359e-09	0.003421	55	4	100
Q9EPK7	Exportin-7 OS=Mus musculus OX=10090 GN=Xpo7 PE=1 SV=3	[K].LGWFDCQKDDYVFR.[N]	1xCarbamidomethyl [C6]; 1xTMTpro [K8]; 1xTMTpro [N-Term]	1.26662e-06	4.83621e-05	1	1	1	1	Q9EPK7 [118-131]	Q9EPK7 1xCarbamidomethyl [C123]	1	2457.25	0.824	0.456037	0.776	1455.2	1765.9	16.84	12.12	1515.8	1397.1	1921.5	1348	1368.7	1784.7	1747.5	1784.5		High	High	High	High	High	High	High	High	High	n/a	2.13e-05		1.67e-07		35		100
P97333	Neuropilin-1 OS=Mus musculus OX=10090 GN=Nrp1 PE=1 SV=2	[K].TFCHWEHDSHAQLR.[W]	1xCarbamidomethyl [C3]; 1xTMTpro [N-Term]	1.28356e-06	4.83621e-05	1	1	1	1	P97333 [659-672]	P97333 1xCarbamidomethyl [C661]	0	2128.01	1.048	0.396209	0.738406	178.1	170	7.49	8.03	175.5	180.7	156.1	186.2	174	147.1	166	176.5		High	High	High	High	High	High	High	High	High	n/a	2.13e-05		1.7e-07		66		100
Q99JY9	Actin-related protein 3 OS=Mus musculus OX=10090 GN=Actr3 PE=1 SV=3	[K].LGYAGNTEPQFIIPSCIAIK.[E]	1xCarbamidomethyl [C16]; 1xTMTpro [K20]; 1xTMTpro [N-Term]	2.79341e-09	4.83621e-05	1	1	1	5	Q99JY9 [19-38]	Q99JY9 1xCarbamidomethyl [C34]	0	2800.56	0.892	0.81807	0.942462	3755.2	4211.8	17.18	22.38	4621.2	3846.4	3038.3	3666.2	2737.6	3928.9	4715.4	4515		High	High	High	High	High	High	High	High	High	n/a	2.13e-05		5.644e-11		66		100
Q641P0	Actin-related protein 3B OS=Mus musculus OX=10090 GN=Actr3b PE=1 SV=1	[K].LGYAGNTEPQFIIPSCIAIR.[E]	1xCarbamidomethyl [C16]; 1xTMTpro [N-Term]	6.17392e-10	4.83621e-05	1	1	1	3	Q641P0 [19-38]	Q641P0 1xCarbamidomethyl [C34]	0	2524.36	0.936	0.492185	0.797189	2604.7	2782.2	18.95	17.86	2673.1	2740.8	1747.3	2538.2	2032.4	2634.7	3128.7	2937.9		High	High	High	High	High	High	High	High	High	n/a	2.13e-05		7.808e-12		61		100
O54991	Contactin-associated protein 1 OS=Mus musculus OX=10090 GN=Cntnap1 PE=1 SV=2	[K].LGYFAEVLFDTCGITDR.[C]	1xCarbamidomethyl [C12]; 1xTMTpro [N-Term]	8.12314e-11	4.83621e-05	1	1	1	4	O54991 [528-544]	O54991 1xCarbamidomethyl [C539]	0	2281.15	1.133	0.331488	0.69424	2994.4	2643.4	11.06	12.86	2900.1	3091.8	2457.7	3179.2	3025.9	2857.3	2445.5	2297.5		High	High	High	High	High	High	High	High	High	n/a	2.13e-05		5.555e-13		84		100
Q9WUA6; P31750; Q60823	RAC-gamma serine/threonine-protein kinase OS=Mus musculus OX=10090 GN=Akt3 PE=1 SV=1 RAC-alpha serine/threonine-protein kinase OS=Mus musculus OX=10090 GN=Akt1 PE=1 SV=2 RAC-beta serine/threonine-protein kinase OS=Mus musculus OX=10090 GN=Akt2 PE=1 SV=1	[K].TFCGTPEYLAPEVLEDNDYGR.[A]	1xCarbamidomethyl [C3]; 1xTMTpro [N-Term]	2.51146e-09	4.83621e-05	3	3	1	3	Q9WUA6 [305-325]; P31750 [308-328]; Q60823 [309-329]	Q9WUA6 1xCarbamidomethyl [C307]; P31750 1xCarbamidomethyl [C310]; Q60823 1xCarbamidomethyl [C311]	0	2750.29	0.867	0.0972882	0.431873	631.9	729.2	10.58	2.3	599.3	635.1	756.1	628.8	759.9	733.1	723	725.2	Shared	High	High	High	High	High	High	High	High	High	Medium	2.13e-05	0.03842	4.881e-11	0.3707	74	2.85	100
P30275	Creatine kinase U-type, mitochondrial OS=Mus musculus OX=10090 GN=Ckmt1 PE=1 SV=1	[R].LGYILTCPSNLGTGLR.[A]	1xCarbamidomethyl [C7]; 1xTMTpro [N-Term]	2.29513e-07	4.83621e-05	1	2	1	15	P30275 [311-326]	P30275 1xCarbamidomethyl [C317]	0	2039.13	1.22	0.00780194	0.175664	7801.4	6396	7.08	6.64	8398.7	8252.6	7362.1	7374.9	6538.5	6091.1	6256.6	7074.7		High	High	High	High	High	High	High	High	High	n/a	2.13e-05		1.793e-08		39		100
Q8C8R3	Ankyrin-2 OS=Mus musculus OX=10090 GN=Ank2 PE=1 SV=2	[K].LGYTPLIVACHYGNVK.[M]	1xCarbamidomethyl [C10]; 1xTMTpro [K16]; 1xTMTpro [N-Term]	3.22324e-11	4.83621e-05	1	1	1	6	Q8C8R3 [727-742]	Q8C8R3 1xCarbamidomethyl [C736]	0	2413.36	0.928	0.785699	0.93128	4143	4465.8	6.34	13.72	4492.8	4130.7	3848.4	4155.3	3425.8	4766	4455.1	4476.5		High	High	High	High	High	High	High	High	High	n/a	2.13e-05		1.656e-13		73		100
P68404; P63318; P20444	Protein kinase C beta type OS=Mus musculus OX=10090 GN=Prkcb PE=1 SV=4 Protein kinase C gamma type OS=Mus musculus OX=10090 GN=Prkcg PE=1 SV=1 Protein kinase C alpha type OS=Mus musculus OX=10090 GN=Prkca PE=1 SV=3	[KR].TFCGTPDYIAPEIIAYQPYGK.[S]	1xCarbamidomethyl [C3]; 1xTMTpro [K21]; 1xTMTpro [N-Term]	1.77089e-07	4.83621e-05	3	3	1	5	P68404 [500-520]; P63318 [514-534]; P20444 [497-517]	P68404 1xCarbamidomethyl [C502]; P63318 1xCarbamidomethyl [C516]; P20444 1xCarbamidomethyl [C499]	0	3012.57	0.962	0.415874	0.752611	5421.2	5632.7	12.4	10.2	5739.9	5449.6	4270.7	5393.1	4929.7	6177.4	5951.3	5331.1	Shared	High	High	High	High	High	High	High	High	High	n/a	2.13e-05		1.276e-08		46		100
Q8BM13	Noelin-2 OS=Mus musculus OX=10090 GN=Olfm2 PE=1 SV=2	[R].LHACAQK.[L]	1xCarbamidomethyl [C4]; 1xTMTpro [K7]; 1xTMTpro [N-Term]	0.000102774	4.83621e-05	1	1	1	2	Q8BM13 [180-186]	Q8BM13 1xCarbamidomethyl [C183]	0	1435.83	0.907	0.470122	0.78474	907.5	1000.7	3.42	17.96	905.3	909.7	901.3	968.1	871.5	827.9	1149	1172		High	High	High	High	High	High	High	High	High	n/a	2.13e-05		6.188e-05		19		100
P42859	Huntingtin OS=Mus musculus OX=10090 GN=Htt PE=1 SV=2	[K].LFYKCDQGQADPVVAVAR.[D]	1xCarbamidomethyl [C5]; 1xTMTpro [K4]; 1xTMTpro [N-Term]	2.76475e-07	4.83621e-05	1	1	1	2	P42859 [918-935]	P42859 1xCarbamidomethyl [C922]	1	2645.44	0.755	0.00603781	0.161554	1963.4	2599.2	9.97	7.33	2047.9	1882.3	2229.5	1777.3	2790.4	2529.3	2671	2350.5		High	High	High	High	High	High	High	High	High	High	2.13e-05	0.0003185	2.28e-08	0.0008032	40	2.75	100
B1AUN2	Eukaryotic translation initiation factor 2B, subunit 3 OS=Mus musculus OX=10090 GN=Eif2b3 PE=1 SV=1	[R].IHFHTGLVDAHLYCLK.[K]	1xCarbamidomethyl [C14]; 1xTMTpro [K16]; 1xTMTpro [N-Term]	3.22652e-05	4.83621e-05	1	1	1	1	B1AUN2 [193-208]	B1AUN2 1xCarbamidomethyl [C206]	0	2532.4	0.922	0.642528	0.873132	544.2	590.1	9.34	6.18	556.1	532.5	632.6	513.9	592.7	592.3	520.2	587.9		High	High	High	High	High	High	High	High	n/a	High		0.0003185		1.43e-05		4.62	100
E9Q137	Testis-expressed protein 264 homolog OS=Mus musculus OX=10090 GN=Tex264 PE=2 SV=1	[K].IHFMCPLAR.[Q]	1xCarbamidomethyl [C5]; 1xTMTpro [N-Term]	6.55229e-05	4.83621e-05	1	1	1	2	E9Q137 [178-186]	E9Q137 1xCarbamidomethyl [C182]	0	1448.78	1.154	0.37319	0.723123	437.5	379	13.29	5.86	454.2	467.1	342.4	421.4	421.4	384.1	373.8	373.2		High	High	High	High	High	High	High	High	High	n/a	2.13e-05		3.211e-05		42		100
Q8BGE6	Cysteine protease ATG4B OS=Mus musculus OX=10090 GN=Atg4b PE=1 SV=2	[K].TEEDFNDWCQQVK.[K]	1xCarbamidomethyl [C9]; 1xTMTpro [K13]; 1xTMTpro [N-Term]	2.6954e-05	4.83621e-05	1	1	1	1	Q8BGE6 [325-337]	Q8BGE6 1xCarbamidomethyl [C333]	0	2307.12	0.936	0.388654	0.732697	1173.4	1253.6	8.52	2.88	1191.7	1122.3	1353.8	1155.4	1255.2	1213.2	1301.4	1252		High	High	High	High	High	High	High	High	High	n/a	2.13e-05		9.407e-06		50		100
Q9DCP2	Sodium-coupled neutral amino acid transporter 3 OS=Mus musculus OX=10090 GN=Slc38a3 PE=1 SV=1	[R].TEDTQHCGEGK.[G]	1xCarbamidomethyl [C7]; 1xTMTpro [K11]; 1xTMTpro [N-Term]	5.17549e-08	4.83621e-05	1	1	1	2	Q9DCP2 [35-45]	Q9DCP2 1xCarbamidomethyl [C41]	0	1869.93	0.775	0.274023	0.643706	921	1188.4	38.55	38.69	849.7	791.6	1697.6	998.3	2286.3	1236.5	1129.3	1142.1		High	High	High	High	High	High	High	High	High	Low	2.13e-05	0.5894	2.548e-09	0.9639	46	2.18	100
Q8CIG8	Protein arginine N-methyltransferase 5 OS=Mus musculus OX=10090 GN=Prmt5 PE=1 SV=3	[R].LHNFHQLSAPKPCFTFSHPNR.[D]	1xCarbamidomethyl [C13]; 1xTMTpro [K11]; 1xTMTpro [N-Term]	2.49046e-08	4.83621e-05	1	1	1	2	Q8CIG8 [506-526]	Q8CIG8 1xCarbamidomethyl [C518]	1	3143.66	1.006	0.769329	0.925761	607.3	603.8	1.73	4.55	599.3	615.4	595.5	615.4	567.1	633.9	601.6	606		High	High	High	High	High	High	High	High	High	n/a	2.13e-05		9.792e-10		25		100
Q60676	Serine/threonine-protein phosphatase 5 OS=Mus musculus OX=10090 GN=Ppp5c PE=1 SV=3	[R].TECYGYALGDATR.[A]	1xCarbamidomethyl [C3]; 1xTMTpro [N-Term]	9.94809e-09	4.83621e-05	1	1	1	2	Q60676 [75-87]	Q60676 1xCarbamidomethyl [C77]	0	1780.85	0.973	0.816043	0.941729	1731.8	1780.5	3.2	12.56	1727.1	1736.4	1748.5	1629.3	1377.4	1819.2	1742.6	1825.3		High	High	High	High	High	High	High	High	High	n/a	2.13e-05		2.955e-10		65		100
P97412	Lysosomal-trafficking regulator OS=Mus musculus OX=10090 GN=Lyst PE=1 SV=1	[R].LHNIQIANHICNLLQK.[G]	1xCarbamidomethyl [C11]; 1xTMTpro [K16]; 1xTMTpro [N-Term]	1.27454e-09	4.83621e-05	1	1	1	1	P97412 [706-721]	P97412 1xCarbamidomethyl [C716]	0	2537.46	1.07	0.129446	0.481596	469.1	438.5	4.41	7.38	480.3	436.7	479	459.3	382.6	441.6	454.3	435.5		High	High	High	High	High	High	High	High	High	n/a	2.13e-05		2.02e-11		55		100
Q9JME7	Trafficking protein particle complex subunit 2-like protein OS=Mus musculus OX=10090 GN=Trappc2l PE=1 SV=1	[K].LHNSYTDVMCNPFYNPGDR.[I]	1xCarbamidomethyl [C10]; 1xTMTpro [N-Term]	1.28304e-09	4.83621e-05	1	1	1	1	Q9JME7 [103-121]	Q9JME7 1xCarbamidomethyl [C112]	0	2604.19	1.018	0.588727	0.848914	965.2	948.2	5.25	29.84	934	1026.1	919.2	997.5	1562.1	941	867.5	955.4		High	High	High	High	High	High	High	High	High	n/a	2.13e-05		2.043e-11		96		100
Q7TSK2	Seizure protein 6 OS=Mus musculus OX=10090 GN=Sez6 PE=1 SV=1	[R].LHPAGATIHFSCAPGYVLK.[G]	1xCarbamidomethyl [C12]; 1xTMTpro [K19]; 1xTMTpro [N-Term]	1.00319e-09	4.83621e-05	1	1	1	3	Q7TSK2 [852-870]	Q7TSK2 1xCarbamidomethyl [C863]	0	2647.47	0.816	0.0833059	0.409037	757.6	928.9	4.75	13.17	743.7	771.7	737	817.2	760.2	977.9	1035.4	882.3		High	High	High	High	High	High	High	High	High	n/a	2.13e-05		1.474e-11		48		100
Q7TNG8	Probable D-lactate dehydrogenase, mitochondrial OS=Mus musculus OX=10090 GN=Ldhd PE=1 SV=1	[R].LHPAPEATVAATCAFPSVQAAVDSTVQILQAAVPVAR.[I]	1xCarbamidomethyl [C13]; 1xTMTpro [N-Term]	6.00325e-13	4.83621e-05	1	1	1	2	Q7TNG8 [239-275]	Q7TNG8 1xCarbamidomethyl [C251]	0	4061.18	1.195	0.0379677	0.305024	315.1	263.7	10.01	5.89	339.6	329.2	270.3	301.7	255.9	271.8	276.1	242.5		High	High	High	High	High	High	High	High	High	n/a	2.13e-05		1.268e-15		103		100
Q9QZM2	DNA polymerase subunit gamma-2, mitochondrial OS=Mus musculus OX=10090 GN=Polg2 PE=1 SV=2	[K].LHPCLAPIK.[V]	1xCarbamidomethyl [C4]; 1xTMTpro [K9]; 1xTMTpro [N-Term]	5.977e-05	4.83621e-05	1	1	1	1	Q9QZM2 [348-356]	Q9QZM2 1xCarbamidomethyl [C351]	0	1657.01	0.994	0.975122	0.993242	407.3	409.6	6.2	10.96	412.8	401.9	393.2	451.5	422.7	474.3	396.9	367		High	High	High	High	High	High	High	High	High	n/a	2.13e-05		2.813e-05		37		100
Q3UJD6	Ubiquitin carboxyl-terminal hydrolase 19 OS=Mus musculus OX=10090 GN=Usp19 PE=1 SV=1	[R].LHPGCGPHTIFR.[W]	1xCarbamidomethyl [C5]; 1xTMTpro [N-Term]	5.31427e-05	4.83621e-05	1	1	1	2	Q3UJD6 [374-385]	Q3UJD6 1xCarbamidomethyl [C378]	0	1695.91	1.077	0.275687	0.644961	933.9	867.4	8.15	5.24	843.9	974.4	895.1	1011.7	836.8	933	894.4	841.3		High	High	High	High	High	High	High	High	High	n/a	2.13e-05		2.377e-05		67		100
Q3UHH1	Zinc finger SWIM domain-containing protein 8 OS=Mus musculus OX=10090 GN=Zswim8 PE=1 SV=1	[R].IHNASAVCLRAPVSESLSR.[L]	1xCarbamidomethyl [C8]; 1xTMTpro [N-Term]	4.40465e-05	4.83621e-05	1	1	1	1	Q3UHH1 [208-226]	Q3UHH1 1xCarbamidomethyl [C215]	1	2371.28	1.012	0.603809	0.856386	270.3	267	13.14	4.51	264.4	324.2	237.6	276.3	273.9	264.1	269.9	246.9		High	High	High	High	High	High	High	High	High	n/a	2.13e-05		1.832e-05		25		100
Q3U1J4	DNA damage-binding protein 1 OS=Mus musculus OX=10090 GN=Ddb1 PE=1 SV=2	[R].TECNHYNNIMALYLK.[T]	1xCarbamidomethyl [C3]; 1xTMTpro [K15]; 1xTMTpro [N-Term]	5.60539e-08	4.83621e-05	1	1	1	3	Q3U1J4 [901-915]	Q3U1J4 1xCarbamidomethyl [C903]	0	2492.29	0.969	0.546923	0.827889	2920.3	3015.1	15.95	5.3	2928.2	2792.1	3867	2912.5	2709	3030.4	3003.6	3026.7		High	High	High	High	High	High	High	High	High	n/a	2.13e-05		2.848e-09		56		100
Q6ZPR4	Potassium channel subfamily T member 1 OS=Mus musculus OX=10090 GN=Kcnt1 PE=1 SV=2	[R].TECHVFSEPHDVR.[A]	1xCarbamidomethyl [C3]; 1xTMTpro [N-Term]	3.06217e-06	4.83621e-05	1	1	1	1	Q6ZPR4 [1010-1022]	Q6ZPR4 1xCarbamidomethyl [C1012]	0	1916.92	1.016	0.812719	0.940677	424.4	417.8	5.68	9.43	417	439.7	385.9	432	480.7	416.9	418.6	384.8		High	High	High	High	High	High	High	High	High	n/a	2.13e-05		5.309e-07		49		100
A2RTH5	Leucine carboxyl methyltransferase 1 OS=Mus musculus OX=10090 GN=Lcmt1 PE=1 SV=1	[K].TECHCQILNLGAGMDTTFWK.[L]	2xCarbamidomethyl [C3; C5]; 1xTMTpro [K20]; 1xTMTpro [N-Term]	2.69964e-06	4.83621e-05	1	1	1	1	A2RTH5 [86-105]	A2RTH5 2xCarbamidomethyl [C88; C90]	0	2990.48	0.952	0.862797	0.958649	520.8	547.2	13.04	4.11	523	518.7	658.4	504.8	543	551.5	537.3	588		High	High	High	High	High	High	High	High	n/a	High		0.0003185		6.782e-07		7.3	100
Q6Q477	Plasma membrane calcium-transporting ATPase 4 OS=Mus musculus OX=10090 GN=Atp2b4 PE=1 SV=1	[K].TECGLLGFVTDLK.[Q]	1xCarbamidomethyl [C3]; 1xTMTpro [K13]; 1xTMTpro [N-Term]	1.83414e-08	4.83621e-05	1	1	1	5	Q6Q477 [536-548]	Q6Q477 1xCarbamidomethyl [C538]	0	2061.15	0.889	0.532368	0.82042	4498.7	5058.2	11.8	15.26	5264.2	4082.5	4785.6	4229	3969.3	4671.2	5564.8	5477.4		High	High	High	High	High	High	High	High	High	n/a	2.13e-05		6.571e-10		43		100
Q9R0K7	Plasma membrane calcium-transporting ATPase 2 OS=Mus musculus OX=10090 GN=Atp2b2 PE=1 SV=2	[K].TECGLLGFVLDLR.[Q]	1xCarbamidomethyl [C3]; 1xTMTpro [N-Term]	2.13725e-08	4.83621e-05	1	1	1	7	Q9R0K7 [524-536]	Q9R0K7 1xCarbamidomethyl [C526]	0	1796.99	0.841	0.228145	0.597474	9559.3	11365.7	11.41	13.76	9327.8	9796.6	8495.2	11137.1	8860.8	12424.2	11392.9	11338.6		High	High	High	High	High	High	High	High	High	High	2.13e-05	0.0003185	8.034e-10	0.01185	69	2.02	100
Q9D2V7	Coronin-7 OS=Mus musculus OX=10090 GN=Coro7 PE=1 SV=2	[K].TECDIQDVEFAR.[C]	1xCarbamidomethyl [C3]; 1xTMTpro [N-Term]	1.45065e-07	4.83621e-05	1	1	1	1	Q9D2V7 [785-796]	Q9D2V7 1xCarbamidomethyl [C787]	0	1786.86	1.029	0.291195	0.659708	752.3	730.7	4.56	11.35	788.1	730.1	717	775.1	581.2	722.1	752.1	739.4		High	High	High	High	High	High	High	High	High	n/a	2.13e-05		9.81e-09		51		100
Q61699	Heat shock protein 105 kDa OS=Mus musculus OX=10090 GN=Hsph1 PE=1 SV=2	[R].LHQECEK.[L]	1xCarbamidomethyl [C5]; 1xTMTpro [K7]; 1xTMTpro [N-Term]	8.84022e-05	4.83621e-05	1	1	1	2	Q61699 [266-272]	Q61699 1xCarbamidomethyl [C270]	0	1551.84	0.775	0.0157956	0.22239	893.7	1152.7	11.03	9.88	922.6	749.3	975	865.7	991.5	1090.1	1224	1218.9		High	High	High	High	High	High	High	High	High	n/a	2.13e-05		4.97e-05		31		100
Q6ZQL4	WD repeat-containing protein 43 OS=Mus musculus OX=10090 GN=Wdr43 PE=1 SV=2	[R].LHQEYVPSAHLSGTCTCLAWAPAR.[L]	2xCarbamidomethyl [C15; C17]; 1xTMTpro [N-Term]	1.61414e-11	4.83621e-05	1	1	1	1	Q6ZQL4 [48-71]	Q6ZQL4 2xCarbamidomethyl [C62; C64]	0	3029.5	1.092	0.483394	0.791222	411.7	377	11.27	8.71	390.1	451.2	349.7	434.6	425.7	397.1	356.3	357.9		High	High	High	High	High	High	High	High	High	n/a	2.13e-05		6.68e-14		81		100
Q0VF55	Calcium-transporting ATPase OS=Mus musculus OX=10090 GN=Atp2b3 PE=1 SV=1	[K].TECALLGFVLDLK.[R]	1xCarbamidomethyl [C3]; 1xTMTpro [K13]; 1xTMTpro [N-Term]	6.64329e-06	4.83621e-05	1	1	1	2	Q0VF55 [543-555]	Q0VF55 1xCarbamidomethyl [C545]	0	2087.21	1.002	0.825531	0.944905	1686.9	1683	7.41	9.18	1820.2	1520.5	1711.4	1662.8	1449.9	1814.1	1666.8	1699.4		High	High	High	High	High	High	High	High	n/a	High		0.0003185		2.024e-06		2.85	100
Q8R2Y0	Monoacylglycerol lipase ABHD6 OS=Mus musculus OX=10090 GN=Abhd6 PE=1 SV=1	[R].IHQFVECLK.[L]	1xCarbamidomethyl [C7]; 1xTMTpro [K9]; 1xTMTpro [N-Term]	1.59284e-05	4.83621e-05	1	1	1	2	Q8R2Y0 [128-136]	Q8R2Y0 1xCarbamidomethyl [C134]	0	1782.02	0.914	0.233761	0.604034	1964.2	2150	10.81	7.16	2216.2	1885.9	1720.6	2045.7	1965.4	2067.3	2299.9	2235.9		High	High	High	High	High	High	High	High	High	n/a	2.13e-05		4.654e-06		45		100
Q9CZX7	Type 2 phosphatidylinositol 4,5-bisphosphate 4-phosphatase OS=Mus musculus OX=10090 GN=Pip4p2 PE=1 SV=1	[K].LHQHVVKCTVCNEATPIK.[T]	2xCarbamidomethyl [C8; C11]; 2xTMTpro [K7; K18]; 1xTMTpro [N-Term]	2.13538e-05	4.83621e-05	1	1	1	1	Q9CZX7 [71-88]	Q9CZX7 2xCarbamidomethyl [C78; C81]	1	3046.71	1.041	0.273285	0.642941	428.4	411.5	6.34	2.02	405.7	452.9	405.3	452.3	399.8	414.4	408.7	419		High	High	High	High	High	High	High	High	n/a	High		0.0005594		0.03459		4	100
Q9EPU4	Cleavage and polyadenylation specificity factor subunit 1 OS=Mus musculus OX=10090 GN=Cpsf1 PE=1 SV=1	[R].LHPMGIDGPIDSFAPFHNVNCPR.[G]	1xCarbamidomethyl [C21]; 1xTMTpro [N-Term]	2.48692e-11	4.83621e-05	1	1	1	1	Q9EPU4 [961-983]	Q9EPU4 1xCarbamidomethyl [C981]	0	2895.44	1.045	0.907436	0.975636	306.4	293.2	7.68	11.87	294.1	319.3	285.5	337.4	360.4	302.3	282.3	284.4		High	High	High	High	High	High	High	High	High	n/a	2.13e-05		1.179e-13		49		100
P15508	Spectrin beta chain, erythrocytic OS=Mus musculus OX=10090 GN=Sptb PE=1 SV=4	[R].LHMLLEVCQFSR.[D]	1xCarbamidomethyl [C8]; 1xTMTpro [N-Term]	4.8367e-06	4.83621e-05	1	1	1	3	P15508 [1996-2007]	P15508 1xCarbamidomethyl [C2003]	0	1836.98	1.059	0.00182927	0.117135	1146.6	1082.5	0.54	1.43	1135.6	1145	1149	1148.2	1088.2	1058.7	1093.4	1076.7		High	High	High	High	High	High	High	High	High	n/a	2.13e-05		9.627e-07		53		100
Q8QZT1	Acetyl-CoA acetyltransferase, mitochondrial OS=Mus musculus OX=10090 GN=Acat1 PE=1 SV=1	[K].IHMGNCAENTAK.[K]	1xCarbamidomethyl [C6]; 1xTMTpro [K12]; 1xTMTpro [N-Term]	5.88287e-09	4.83621e-05	1	1	1	3	Q8QZT1 [188-199]	Q8QZT1 1xCarbamidomethyl [C193]	0	1954.01	0.887	0.634836	0.869483	1662	1874.3	20.77	19.11	1969.6	1698.6	1162.8	1626.2	1246.1	1862.8	1967.3	1885.9		High	High	High	High	High	High	High	High	High	n/a	2.13e-05		1.497e-10		72		100
Q9Z1Q5	Chloride intracellular channel protein 1 OS=Mus musculus OX=10090 GN=Clic1 PE=1 SV=3	[K].LHIVQVVCK.[K]	1xCarbamidomethyl [C8]; 1xTMTpro [K9]; 1xTMTpro [N-Term]	2.87463e-05	4.83621e-05	1	1	1	2	Q9Z1Q5 [184-192]	Q9Z1Q5 1xCarbamidomethyl [C191]	0	1704.05	0.833	0.214464	0.585747	696.7	836.4	13.37	10.79	709.9	677.2	885.8	683.8	827.6	930.5	713.1	845.4		High	High	High	High	High	High	High	High	High	n/a	2.13e-05		1.031e-05		37		100
O54774	AP-3 complex subunit delta-1 OS=Mus musculus OX=10090 GN=Ap3d1 PE=1 SV=1	[R].LHFSCSSYLITTPCYSDAFAK.[L]	2xCarbamidomethyl [C5; C14]; 1xTMTpro [K21]; 1xTMTpro [N-Term]	2.81694e-10	4.83621e-05	1	1	1	1	O54774 [1086-1106]	O54774 2xCarbamidomethyl [C1090; C1099]	0	3076.54	1.004	0.537264	0.822245	271.6	270.4	38.65	4.49	243.7	272	511.9	271.2	270.5	293.8	270.3	267		High	High	High	High	High	High	High	High	High	n/a	2.13e-05		2.806e-12		59		100
Q7TPV4	Myb-binding protein 1A OS=Mus musculus OX=10090 GN=Mybbp1a PE=1 SV=2	[K].LHGADTEDSEDQAANCLDLDFVTR.[V]	1xCarbamidomethyl [C16]; 1xTMTpro [N-Term]	5.4506e-11	4.83621e-05	1	1	1	1	Q7TPV4 [948-971]	Q7TPV4 1xCarbamidomethyl [C963]	0	2996.39	0.784	0.36926	0.721054	513.7	654.9	28.5	1.87	491.3	508.5	841.9	519	646.3	653.3	675.1	656.5		High	High	High	High	High	High	High	High	High	n/a	2.13e-05		3.295e-13		48		100
Q8R366	Immunoglobulin superfamily member 8 OS=Mus musculus OX=10090 GN=Igsf8 PE=1 SV=2	[R].LHGLGPEDEGIYHCAPSAWVQHADYSWYQAGSAR.[S]	1xCarbamidomethyl [C14]; 1xTMTpro [N-Term]	3.81083e-06	4.83621e-05	1	1	1	1	Q8R366 [529-562]	Q8R366 1xCarbamidomethyl [C542]	0	4132.93	1.003	0.718967	0.905543	464.2	462.8	6.71	4.23	467.2	522.5	451.5	461.2	494.6	472.2	452.5	453.5		High	High	High	High	High	High	High	High	High	n/a	2.13e-05		7.069e-07		24		100
O09117	Synaptophysin-like protein 1 OS=Mus musculus OX=10090 GN=Sypl1 PE=1 SV=2	[K].TEIQVNCPK.[V]	1xCarbamidomethyl [C7]; 1xTMTpro [K9]; 1xTMTpro [N-Term]	4.93128e-05	4.83621e-05	1	1	1	3	O09117 [58-66]	O09117 1xCarbamidomethyl [C64]	0	1696.95	1.023	0.824208	0.944454	1851.1	1810.1	13.49	31.97	2013.2	1639.2	2173.1	1702	2933.8	1692.2	1480.8	1936.1		High	High	High	High	High	High	High	High	High	n/a	2.13e-05		2.144e-05		45		100
P62918	60S ribosomal protein L8 OS=Mus musculus OX=10090 GN=Rpl8 PE=1 SV=2	[R].TELFIAAEGIHTGQFVYCGK.[K]	1xCarbamidomethyl [C18]; 1xTMTpro [K20]; 1xTMTpro [N-Term]	3.92123e-09	4.83621e-05	1	1	1	2	P62918 [73-92]	P62918 1xCarbamidomethyl [C90]	0	2849.52	0.947	0.941618	0.984039	1593.2	1682.2	14.7	1.47	1567.2	1572.9	2085.6	1613.8	1722.9	1664.8	1678.4	1685.9		High	High	High	High	High	High	High	High	High	n/a	2.13e-05		8.79e-11		47		100
Q3UPF5	Zinc finger CCCH-type antiviral protein 1 OS=Mus musculus OX=10090 GN=Zc3hav1 PE=1 SV=1	[R].LHICEHFTR.[G]	1xCarbamidomethyl [C4]; 1xTMTpro [N-Term]	6.27789e-05	4.83621e-05	1	1	1	1	Q3UPF5 [171-179]	Q3UPF5 1xCarbamidomethyl [C174]	0	1516.8	1.585	0.0703169	0.38174	127	80.1	22.12	2.62	125.7	129	76.9	128.3	80.9	79.6	76.4	80.7		High	High	High	High	High	High	High	High	High	n/a	2.13e-05		3.014e-05		27		100
Q9CPS6	Adenosine 5'-monophosphoramidase HINT3 OS=Mus musculus OX=10090 GN=Hint3 PE=1 SV=1	[K].TELFHCENEDLVCFK.[D]	2xCarbamidomethyl [C6; C13]; 1xTMTpro [K15]; 1xTMTpro [N-Term]	3.12226e-08	4.83621e-05	1	1	1	1	Q9CPS6 [44-58]	Q9CPS6 2xCarbamidomethyl [C49; C56]	0	2549.27	1.054	0.625977	0.866045	986	935.9	7.31	9.86	984	891.3	1066.8	988.1	1080.6	861.7	910.5	961.9		High	High	High	High	High	High	High	High	High	n/a	2.13e-05		1.317e-09		51		100
Q99P31	Hsp70-binding protein 1 OS=Mus musculus OX=10090 GN=Hspbp1 PE=1 SV=1	[R].TEHSPFHEHVLGALCSLVTDFPQGVR.[E]	1xCarbamidomethyl [C15]; 1xTMTpro [N-Term]	1.56904e-10	4.83621e-05	1	1	1	3	Q99P31 [281-306]	Q99P31 1xCarbamidomethyl [C295]	0	3237.64	1.014	0.431692	0.761856	1179.2	1162.8	17.71	2.92	1122.1	1188.7	1607.2	1169.8	1135.2	1144.7	1181.3	1209.1		High	High	High	High	High	High	High	High	High	High	2.13e-05	0.0003185	1.31e-12	0.0003743	40	5.9	100
P07214	SPARC OS=Mus musculus OX=10090 GN=Sparc PE=1 SV=1	[K].LHLDYIGPCK.[Y]	1xCarbamidomethyl [C9]; 1xTMTpro [K10]; 1xTMTpro [N-Term]	1.72266e-05	4.83621e-05	1	1	1	1	P07214 [140-149]	P07214 1xCarbamidomethyl [C148]	0	1824.03	0.907	0.352553	0.709509	1088.5	1200.7	7.57	19.05	1196.7	1053.3	1124.9	1007.5	1485.1	1386.2	1040	1028.8		High	High	High	High	High	High	High	High	High	Low	2.13e-05	0.2076	5.192e-06	0.6748	45	1.2	100
P52734	FYVE, RhoGEF and PH domain-containing protein 1 OS=Mus musculus OX=10090 GN=Fgd1 PE=1 SV=2	[R].LHLLDQVFCAR.[L]	1xCarbamidomethyl [C9]; 1xTMTpro [N-Term]	7.1911e-06	4.83621e-05	1	1	1	2	P52734 [391-401]	P52734 1xCarbamidomethyl [C399]	0	1675.93	1.029	0.880514	0.966534	834.9	811.6	6.11	7.83	785.1	870.6	800.6	888.8	919.5	778.8	838.4	785.6		High	High	High	High	High	High	High	High	High	n/a	2.13e-05		1.634e-06		25		100
Q7TNF0	Double C2-like domain-containing protein alpha OS=Mus musculus OX=10090 GN=Doc2a PE=2 SV=1	[K].LHLLPGACK.[A]	1xCarbamidomethyl [C8]; 1xTMTpro [K9]; 1xTMTpro [N-Term]	0.000103362	4.83621e-05	1	1	1	1	Q7TNF0 [136-144]	Q7TNF0 1xCarbamidomethyl [C143]	0	1616.98	0.857	0.197072	0.568461	440.8	514.6	11.05	16	508.4	436.4	388.9	445.3	421.6	482.4	612.6	548.9		High	High	High	High	High	High	High	High	High	n/a	2.13e-05		6.249e-05		43		100
E9Q912	Rap1 GTPase-GDP dissociation stimulator 1 OS=Mus musculus OX=10090 GN=Rap1gds1 PE=2 SV=1	[R].TEGSLEGCLDCLLQALAQNNAETSEK.[I]	2xCarbamidomethyl [C8; C11]; 1xTMTpro [K26]; 1xTMTpro [N-Term]	6.30929e-11	4.83621e-05	1	1	1	2	E9Q912 [19-44]	E9Q912 2xCarbamidomethyl [C26; C29]	0	3459.72	0.666	0.321244	0.68561	1356.4	2035.6	32.29	24.52	1486.6	1202.9	2278.5	1237.6	1262.5	1879	2205.2	2299.2		High	High	High	High	High	High	High	High	High	n/a	2.13e-05		3.973e-13		98		100
Q9D7X8	Gamma-glutamylcyclotransferase OS=Mus musculus OX=10090 GN=Ggct PE=1 SV=1	[R].IHLRNPSAVFCCVAR.[L]	2xCarbamidomethyl [C11; C12]; 1xTMTpro [N-Term]	1.80095e-06	4.83621e-05	1	1	1	1	Q9D7X8 [31-45]	Q9D7X8 2xCarbamidomethyl [C41; C42]	1	2104.12	0.954	0.674691	0.887651	108.8	114.1	16.53	7.14	94.5	112.5	138.3	105.3	127.8	116.5	111.7	109		High	High	High	High	High	High	High	High	High	n/a	2.13e-05		2.647e-07		35		100
Q99ME2	WD repeat-containing protein 6 OS=Mus musculus OX=10090 GN=Wdr6 PE=1 SV=1	[K].LHIVNCGGGHR.[S]	1xCarbamidomethyl [C6]; 1xTMTpro [N-Term]	1.25011e-05	4.83621e-05	1	1	1	3	Q99ME2 [648-658]	Q99ME2 1xCarbamidomethyl [C653]	0	1523.82	1.097	0.156791	0.519401	523.8	477.6	5.47	8.81	500.7	558.7	504.4	543.9	539	497	458.9	443.5		High	High	High	High	High	High	High	High	High	n/a	2.13e-05		3.366e-06		46		100
Q8BIJ6	Isoleucine--tRNA ligase, mitochondrial OS=Mus musculus OX=10090 GN=Iars2 PE=1 SV=1	[K].TEFCLHDGPPYANGDPHVGHALNK.[I]	1xCarbamidomethyl [C4]; 1xTMTpro [K24]; 1xTMTpro [N-Term]	2.69964e-06	4.83621e-05	1	1	1	1	Q8BIJ6 [107-130]	Q8BIJ6 1xCarbamidomethyl [C110]	0	3254.63	1.095	0.0204007	0.246289	445.8	407	3.71	4.04	461.5	439.6	452.1	423.4	407.1	407	387.9	428.2		High	High	High	High	High	High	High	High	High	n/a	2.13e-05		4.496e-07		18		100
Q3UHL1	CaM kinase-like vesicle-associated protein OS=Mus musculus OX=10090 GN=Camkv PE=1 SV=2	[K].TEEFCEIFR.[A]	1xCarbamidomethyl [C5]; 1xTMTpro [N-Term]	2.26375e-05	4.83621e-05	1	1	1	3	Q3UHL1 [32-40]	Q3UHL1 1xCarbamidomethyl [C36]	0	1534.75	0.94	0.472312	0.786172	1905.8	2027.6	10.47	13.51	2147.8	1955	1668.6	1857.9	1777.8	1835.7	2319.7	2239.6		High	High	High	High	High	High	High	High	High	n/a	2.13e-05		7.466e-06		44		100
A2AGT5	Cytoskeleton-associated protein 5 OS=Mus musculus OX=10090 GN=Ckap5 PE=1 SV=1	[R].TEMPCQALVK.[M]	1xCarbamidomethyl [C5]; 1xTMTpro [K10]; 1xTMTpro [N-Term]	2.61157e-06	4.83621e-05	1	1	1	1	A2AGT5 [633-642]	A2AGT5 1xCarbamidomethyl [C637]	0	1784.99	0.931	0.00571478	0.159301	1217.7	1308.1	0.95	2.63	1219	1216.7	1218.8	1195.1	1278.3	1289.7	1353.4	1326.8		High	High	High	High	High	High	High	High	High	n/a	2.13e-05		4.301e-07		33		100
P80315	T-complex protein 1 subunit delta OS=Mus musculus OX=10090 GN=Cct4 PE=1 SV=3	[K].TGCNVLLIQK.[S]	1xCarbamidomethyl [C3]; 1xTMTpro [K10]; 1xTMTpro [N-Term]	3.81083e-06	4.83621e-05	1	1	1	2	P80315 [293-302]	P80315 1xCarbamidomethyl [C295]	0	1754.05	1.033	0.461719	0.77988	2217.6	2146	16.01	5.96	2209.7	1990.2	2852.7	2225.5	2053.8	2283.1	2032.3	2242.3		High	High	High	High	High	High	High	High	High	n/a	2.13e-05		7.049e-07		54		100
Q9JMH7	Sialidase-3 OS=Mus musculus OX=10090 GN=Neu3 PE=1 SV=1	[R].TGCQGSVVSFRPLK.[M]	1xCarbamidomethyl [C3]; 1xTMTpro [K14]; 1xTMTpro [N-Term]	2.23459e-05	4.83621e-05	1	1	1	1	Q9JMH7 [275-288]	Q9JMH7 1xCarbamidomethyl [C277]	1	2144.21	0.968	0.979367	0.994445	694.3	716.9	10.33	11.13	685.2	703.5	839.4	682	812.9	778.4	655.2	660.3		High	High	High	High	High	High	High	High	High	n/a	2.13e-05		7.324e-06		38		100
Q3UTZ3	Trafficking protein particle complex subunit 14 OS=Mus musculus OX=10090 GN=Trappc14 PE=1 SV=2	[R].LDRPCFVMTASCESPVR.[T]	2xCarbamidomethyl [C5; C12]; 1xTMTpro [N-Term]	4.20291e-07	4.83621e-05	1	1	1	1	Q3UTZ3 [365-381]	Q3UTZ3 2xCarbamidomethyl [C369; C376]	1	2329.14	1.01	0.670726	0.885225	937.8	928.5	7.23	15.25	980.7	1017.8	874	896.8	1204.2	914.2	872.4	943.1		High	High	High	High	High	High	High	High	High	n/a	2.13e-05		3.944e-08		19		100
Q3UFK8	FERM domain-containing protein 8 OS=Mus musculus OX=10090 GN=Frmd8 PE=1 SV=2	[K].LDSFLPAHLCK.[R]	1xCarbamidomethyl [C10]; 1xTMTpro [K11]; 1xTMTpro [N-Term]	5.16469e-07	4.83621e-05	1	1	1	1	Q3UFK8 [197-207]	Q3UFK8 1xCarbamidomethyl [C206]	0	1909.09	1.027	0.81999	0.943162	1187.3	1156.5	5.47	13.94	1281.1	1123.9	1176.9	1197.7	1475.3	1149.2	1102.4	1163.8		High	High	High	High	High	High	High	High	High	n/a	2.13e-05		5.191e-08		58		100
Q8VCT3	Aminopeptidase B OS=Mus musculus OX=10090 GN=Rnpep PE=1 SV=2	[R].LDSHSCLEVTAATLR.[R]	1xCarbamidomethyl [C6]; 1xTMTpro [N-Term]	9.00368e-09	4.83621e-05	1	1	1	2	Q8VCT3 [80-94]	Q8VCT3 1xCarbamidomethyl [C85]	0	1977.04	0.979	0.986883	0.996904	997.8	1019.5	8.94	4.09	939.9	1029.6	1144.9	967	1062.6	1036.7	966.8	1002.6		High	High	High	High	High	High	High	High	High	n/a	2.13e-05		2.61e-10		67		100
Q9WUM3	Coronin-1B OS=Mus musculus OX=10090 GN=Coro1b PE=1 SV=1	[R].LDSLHPDLIYNVSWNHNGSLFCSACK.[D]	2xCarbamidomethyl [C22; C25]; 1xTMTpro [K26]; 1xTMTpro [N-Term]	9.24639e-09	4.83621e-05	1	1	1	1	Q9WUM3 [171-196]	Q9WUM3 2xCarbamidomethyl [C192; C195]	0	3655.83	1.109	0.15098	0.511642	1283.3	1156.9	12.65	16.32	1269.3	1178.1	1568.5	1297.6	863.3	1134.1	1180.2	1293.7		High	High	High	High	High	High	High	High	High	n/a	2.13e-05		2.7e-10		38		100
Q9D071	MMS19 nucleotide excision repair protein homolog OS=Mus musculus OX=10090 GN=Mms19 PE=1 SV=1	[K].LDSLQTLNACCAVYGQK.[E]	2xCarbamidomethyl [C10; C11]; 1xTMTpro [K17]; 1xTMTpro [N-Term]	7.0585e-07	4.83621e-05	1	1	1	1	Q9D071 [277-293]	Q9D071 2xCarbamidomethyl [C286; C287]	0	2549.33	1.234	0.132402	0.487213	764.4	619.4	16.67	9.12	701.1	893.5	613.4	833.5	712.5	634.9	604.2	579.7		High	High	High	High	High	High	High	High	High	n/a	2.13e-05		7.771e-08		27		100
Q8BMQ8	Vacuolar fusion protein MON1 homolog B OS=Mus musculus OX=10090 GN=Mon1b PE=2 SV=1	[R].LDSMPVCLLLLGTNR.[E]	1xCarbamidomethyl [C7]; 1xTMTpro [N-Term]	1.00384e-06	4.83621e-05	1	1	1	2	Q8BMQ8 [349-363]	Q8BMQ8 1xCarbamidomethyl [C355]	0	2006.11	1.02	0.644739	0.874588	809	792.9	13.07	1.19	714.8	798.9	973.9	819.1	787.7	798	787.4	807.3		High	High	High	High	High	High	High	High	High	n/a	2.13e-05		1.229e-07		52		100
Q9D2Q3	ATPase PAAT OS=Mus musculus OX=10090 GN=Paat PE=2 SV=1	[K].LDSPTHACK.[I]	1xCarbamidomethyl [C8]; 1xTMTpro [K9]; 1xTMTpro [N-Term]	4.46046e-05	4.83621e-05	1	1	1	1	Q9D2Q3 [137-145]	Q9D2Q3 1xCarbamidomethyl [C144]	0	1636.9	0.98	0.99972	0.999853	553.7	564.8	2.84	7.9	532.1	544.9	562.6	565.4	490.4	555.3	589.6	574.4		High	High	High	High	High	High	High	High	High	n/a	2.13e-05		1.874e-05		30		100
Q9D920	BLOC-1-related complex subunit 5 OS=Mus musculus OX=10090 GN=Borcs5 PE=1 SV=1	[K].LDSQQVLQLCLR.[Y]	1xCarbamidomethyl [C10]; 1xTMTpro [N-Term]	4.57406e-05	4.83621e-05	1	1	1	2	Q9D920 [84-95]	Q9D920 1xCarbamidomethyl [C93]	0	1777	1.097	0.201915	0.573636	446.1	406.5	3.78	10.2	433.3	473.2	449	443.2	473.4	394.1	375.8	419.2		High	High	High	High	High	High	High	High	High	n/a	2.13e-05		1.93e-05		32		100
Q6VNS1	NT-3 growth factor receptor OS=Mus musculus OX=10090 GN=Ntrk3 PE=1 SV=1	[R].LDSQSLYCISADGSQLPLFR.[M]	1xCarbamidomethyl [C8]; 1xTMTpro [N-Term]	5.15027e-09	4.83621e-05	1	1	1	4	Q6VNS1 [182-201]	Q6VNS1 1xCarbamidomethyl [C189]	0	2574.32	1.031	0.410052	0.749363	1199.1	1163.2	4.46	3.56	1158.2	1241.5	1148	1249.1	1182.6	1127.8	1221	1144.2		High	High	High	High	High	High	High	High	High	n/a	2.13e-05		1.255e-10		85		100
Q68FE6	Rho family-interacting cell polarization regulator 1 OS=Mus musculus OX=10090 GN=Ripor1 PE=1 SV=2	[R].LDSSNGQSLSTGCSALDATLVQHLYHCSR.[L]	2xCarbamidomethyl [C13; C27]; 1xTMTpro [N-Term]	5.14119e-08	4.83621e-05	1	1	1	1	Q68FE6 [884-912]	Q68FE6 2xCarbamidomethyl [C896; C910]	0	3481.68	1.063	0.0987781	0.433735	167.7	157.8	5.61	2.16	169	181.9	166.3	159.2	157.3	163.1	155	158.3		High	High	High	High	High	High	High	High	High	n/a	2.13e-05		2.534e-09		24		100
P58854	Gamma-tubulin complex component 3 OS=Mus musculus OX=10090 GN=Tubgcp3 PE=1 SV=2	[K].TLAALVDHCQGRK.[G]	1xCarbamidomethyl [C9]; 1xTMTpro [K13]; 1xTMTpro [N-Term]	1.44656e-06	4.83621e-05	1	1	1	1	P58854 [378-390]	P58854 1xCarbamidomethyl [C386]	1	2077.18	0.879	0.0589323	0.359434	470.5	535.3	8.81	6.82	533.9	450.6	441.9	491.2	522.6	513.2	596.2	548.3		High	High	High	High	High	High	High	High	High	n/a	2.13e-05		1.982e-07		32		100
Q8CHP8	Glycerol-3-phosphate phosphatase OS=Mus musculus OX=10090 GN=Pgp PE=1 SV=1	[R].LDTDILLGSTCSLK.[T]	1xCarbamidomethyl [C11]; 1xTMTpro [K14]; 1xTMTpro [N-Term]	1.10347e-05	4.83621e-05	1	1	1	2	Q8CHP8 [262-275]	Q8CHP8 1xCarbamidomethyl [C272]	0	2144.21	0.9	0.221613	0.592087	2216	2461.8	6.13	8.07	2469.2	2161.2	2234.2	2197.9	2178.2	2387.6	2538.3	2626.8		High	High	High	High	High	High	High	High	High	n/a	2.13e-05		2.876e-06		19		100
Q03141; Q8VHJ5; Q8CIP4; Q05512	MAP/microtubule affinity-regulating kinase 3 OS=Mus musculus OX=10090 GN=Mark3 PE=1 SV=2 Serine/threonine-protein kinase MARK1 OS=Mus musculus OX=10090 GN=Mark1 PE=1 SV=2 MAP/microtubule affinity-regulating kinase 4 OS=Mus musculus OX=10090 GN=Mark4 PE=1 SV=1 Serine/threonine-protein kinase MARK2 OS=Mus musculus OX=10090 GN=Mark2 PE=1 SV=3	[K].LDTFCGSPPYAAPELFQGK.[K]	1xCarbamidomethyl [C5]; 1xTMTpro [K19]; 1xTMTpro [N-Term]	3.73632e-08	4.83621e-05	4	4	1	2	Q03141 [209-227]; Q8VHJ5 [213-231]; Q8CIP4 [212-230]; Q05512 [206-224]	Q03141 1xCarbamidomethyl [C213]; Q8VHJ5 1xCarbamidomethyl [C217]; Q8CIP4 1xCarbamidomethyl [C216]; Q05512 1xCarbamidomethyl [C210]	0	2706.41	0.947	0.203791	0.575778	968.3	1022.7	8.91	7.21	1038.1	979.8	836.2	956.9	980.7	966.2	1124.6	1066.6	Shared	High	High	High	High	High	High	High	High	High	n/a	2.13e-05		1.667e-09		44		100
Q6RI63	Constitutive coactivator of peroxisome proliferator-activated receptor gamma OS=Mus musculus OX=10090 GN=Fam120b PE=1 SV=1	[R].LDTLLACFNLSSSR.[E]	1xCarbamidomethyl [C7]; 1xTMTpro [N-Term]	1.12544e-05	4.83621e-05	1	1	1	1	Q6RI63 [572-585]	Q6RI63 1xCarbamidomethyl [C578]	0	1901.01	1.1	0.32513	0.687877	717	652	30.87	5.35	616.7	684	1168.8	751.5	631.4	710.7	640.5	663.7		High	High	High	High	High	High	High	High	High	n/a	2.13e-05		2.952e-06		55		100
P58854	Gamma-tubulin complex component 3 OS=Mus musculus OX=10090 GN=Tubgcp3 PE=1 SV=2	[K].TLAALVDHCQGR.[K]	1xCarbamidomethyl [C9]; 1xTMTpro [N-Term]	1.71916e-06	4.83621e-05	1	1	1	1	P58854 [378-389]	P58854 1xCarbamidomethyl [C386]	0	1644.88	0.94	0.0907642	0.422132	361.7	385	6.43	3.58	358.3	365.2	319.9	369.7	396.1	383	386.9	363.6		High	High	High	High	High	High	High	High	High	n/a	2.13e-05		2.495e-07		57		100
Q8VEM9	Kelch domain-containing protein 3 OS=Mus musculus OX=10090 GN=Klhdc3 PE=2 SV=1	[K].LDTSTMTWTLVCTK.[G]	1xCarbamidomethyl [C12]; 1xTMTpro [K14]; 1xTMTpro [N-Term]	3.93108e-05	4.83621e-05	1	1	1	1	Q8VEM9 [160-173]	Q8VEM9 1xCarbamidomethyl [C171]	0	2265.21	1.011	0.855767	0.955532	611.9	605.5	8	4.67	582	642.3	684.7	583	658.4	612.8	598.3	596.9		High	High	High	High	High	High	High	High	High	n/a	2.13e-05		1.571e-05		30		100
Q60930	Voltage-dependent anion-selective channel protein 2 OS=Mus musculus OX=10090 GN=Vdac2 PE=1 SV=2	[K].TKSCSGVEFSTSGSSNTDTGK.[V]	1xCarbamidomethyl [C4]; 2xTMTpro [K2; K21]; 1xTMTpro [N-Term]	2.47828e-09	4.83621e-05	1	1	1	1	Q60930 [45-65]	Q60930 1xCarbamidomethyl [C48]	1	3049.56	0.851	0.0688659	0.379677	595.8	699.7	13.31	10.94	689	496.9	608.3	583.5	829	685.4	714.3	646.1		High	High	High	High	High	High	High	High	High	n/a	2.13e-05		4.799e-11		46		100
O08756	3-hydroxyacyl-CoA dehydrogenase type-2 OS=Mus musculus OX=10090 GN=Hsd17b10 PE=1 SV=4	[R].IDVAVNCAGIAVAIK.[T]	1xCarbamidomethyl [C7]; 1xTMTpro [K15]; 1xTMTpro [N-Term]	9.65632e-11	4.83621e-05	1	1	1	10	O08756 [85-99]	O08756 1xCarbamidomethyl [C91]	0	2122.25	1.087	0.0242035	0.259804	7710.6	7092.7	3.61	1.2	7602.1	7265.9	7871.6	7820.7	7031.8	7064.9	7120.7	7227.3		High	High	High	High	High	High	High	High	High	n/a	2.13e-05		6.931e-13		105		100
P62242	40S ribosomal protein S8 OS=Mus musculus OX=10090 GN=Rps8 PE=1 SV=2	[R].LDVGNFSWGSECCTR.[K]	2xCarbamidomethyl [C12; C13]; 1xTMTpro [N-Term]	7.92091e-08	4.83621e-05	1	1	1	2	P62242 [60-74]	P62242 2xCarbamidomethyl [C71; C72]	0	2091.95	1.018	0.971373	0.99166	1659.2	1630.6	5.79	5.01	1507.8	1674.2	1731.2	1644.4	1738.6	1657.1	1604.5	1545.6		High	High	High	High	High	High	High	High	High	n/a	2.13e-05		4.44e-09		21		100
P62242	40S ribosomal protein S8 OS=Mus musculus OX=10090 GN=Rps8 PE=1 SV=2	[R].LDVGNFSWGSECCTRK.[T]	2xCarbamidomethyl [C12; C13]; 1xTMTpro [K16]; 1xTMTpro [N-Term]	5.15027e-09	4.83621e-05	1	1	1	2	P62242 [60-75]	P62242 2xCarbamidomethyl [C71; C72]	1	2524.26	0.992	0.907865	0.975636	3328.6	3355	9.56	3.62	3360.5	3034.8	3811	3297	3206.1	3463.4	3283.4	3428.2		High	High	High	High	High	High	High	High	High	High	2.13e-05	0.0003185	1.249e-10	0.002301	23	3.77	100
Q9ERI6	Retinol dehydrogenase 14 OS=Mus musculus OX=10090 GN=Rdh14 PE=1 SV=1	[R].LDVLINNAGVFHCPYTK.[T]	1xCarbamidomethyl [C13]; 1xTMTpro [K17]; 1xTMTpro [N-Term]	1.08463e-08	4.83621e-05	1	1	1	2	Q9ERI6 [134-150]	Q9ERI6 1xCarbamidomethyl [C146]	0	2569.41	0.969	0.387291	0.731668	1834.1	1892.9	8.43	18.62	2070	1786.1	1706.1	1883.4	2632.3	1819.8	1882	1903.9		High	High	High	High	High	High	High	High	High	n/a	2.13e-05		3.329e-10		26		100
Q9WUA2	Phenylalanine--tRNA ligase beta subunit OS=Mus musculus OX=10090 GN=Farsb PE=1 SV=2	[K].IDVPANRYDLLCLEGLAR.[G]	1xCarbamidomethyl [C12]; 1xTMTpro [N-Term]	1.11643e-06	4.83621e-05	1	1	1	3	Q9WUA2 [65-82]	Q9WUA2 1xCarbamidomethyl [C76]	1	2392.3	0.974	0.541645	0.825235	1588.1	1629.6	2.11	4.42	1586.9	1609.7	1589.2	1531.8	1503.1	1625.4	1664	1633.9		High	High	High	High	High	High	High	High	High	High	2.13e-05	0.0003185	1.411e-07	0.02427	25	2.54	100
F8VPN4	Glycogen debranching enzyme OS=Mus musculus OX=10090 GN=Agl PE=1 SV=1	[R].LDNCHSTPLHVAEYMLDAAR.[K]	1xCarbamidomethyl [C4]; 1xTMTpro [N-Term]	4.89722e-07	4.83621e-05	1	1	1	1	F8VPN4 [525-544]	F8VPN4 1xCarbamidomethyl [C528]	0	2617.28	0.977	0.337805	0.699497	635.7	650.6	5.37	5.57	624.5	677	596.5	647.1	714.4	661.7	633.1	639.7		High	High	High	High	High	High	High	High	n/a	High		0.0003185		8.58e-08		6.31	100
O35927	Catenin delta-2 OS=Mus musculus OX=10090 GN=Ctnnd2 PE=1 SV=1	[R].IDNDRVVCAVATALR.[N]	1xCarbamidomethyl [C8]; 1xTMTpro [N-Term]	1.12326e-09	4.83621e-05	1	1	1	4	O35927 [925-939]	O35927 1xCarbamidomethyl [C932]	1	1977.09	0.887	0.0429979	0.318076	1795.1	2023.1	9.85	8.26	1845.3	1815.9	1476.5	1774.6	1911.2	1901.2	2240	2141.6		High	High	High	High	High	High	High	High	High	High	2.13e-05	0.0003185	1.713e-11	0.005374	59	2.7	100
P11862	Growth arrest-specific protein 2 OS=Mus musculus OX=10090 GN=Gas2 PE=1 SV=1	[K].LDNGALLCQLAATVQEK.[F]	1xCarbamidomethyl [C8]; 1xTMTpro [K17]; 1xTMTpro [N-Term]	6.47005e-06	4.83621e-05	1	1	1	1	P11862 [62-78]	P11862 1xCarbamidomethyl [C69]	0	2452.37	0.96	0.801919	0.937018	599.8	624.7	5.31	10.69	616.2	566.1	637.2	583.8	530.7	589	662.5	668.5		High	High	High	High	High	High	High	High	High	n/a	2.13e-05		1.417e-06		59		100
Q9Z2W0	Aspartyl aminopeptidase OS=Mus musculus OX=10090 GN=Dnpep PE=1 SV=2	[R].LDNLHSCFCALQALIDSCASPASLAR.[D]	3xCarbamidomethyl [C7; C9; C18]; 1xTMTpro [N-Term]	2.67565e-11	4.83621e-05	1	1	1	2	Q9Z2W0 [261-286]	Q9Z2W0 3xCarbamidomethyl [C267; C269; C278]	0	3194.57	1.15	0.0248064	0.261747	1235.4	1074.2	8.16	1.9	1163.4	1221.2	1403.9	1249.9	1092.7	1045.1	1068	1080.5		High	High	High	High	High	High	High	High	High	Low	2.13e-05	0.8784	1.292e-13	1	67	1.86	100
P16054	Protein kinase C epsilon type OS=Mus musculus OX=10090 GN=Prkce PE=1 SV=1	[K].LDNILLDAEGHCK.[L]	1xCarbamidomethyl [C12]; 1xTMTpro [K13]; 1xTMTpro [N-Term]	3.16962e-09	4.83621e-05	1	1	1	3	P16054 [535-547]	P16054 1xCarbamidomethyl [C546]	0	2106.15	0.901	0.441055	0.76701	2156.4	2394.3	9.82	14.31	2335.7	1990.9	2367.2	1975.9	1916.9	2244.2	2661.5	2554.5		High	High	High	High	High	High	High	High	High	n/a	2.13e-05		6.631e-11		51		100
Q8C6G8	WD repeat-containing protein 26 OS=Mus musculus OX=10090 GN=Wdr26 PE=1 SV=3	[K].LDNNLDSVSLLIDHVCSR.[R]	1xCarbamidomethyl [C16]; 1xTMTpro [N-Term]	2.03007e-09	4.83621e-05	1	1	1	3	Q8C6G8 [303-320]	Q8C6G8 1xCarbamidomethyl [C318]	0	2374.24	0.98	0.375755	0.724776	859.7	877.7	6.71	1.73	825.6	903.8	784.4	895.2	903.1	873.7	881.8	868.3		High	High	High	High	High	High	High	High	High	n/a	2.13e-05		3.725e-11		75		100
Q8C6G8	WD repeat-containing protein 26 OS=Mus musculus OX=10090 GN=Wdr26 PE=1 SV=3	[K].LDNNLDSVSLLIDHVCSRR.[Q]	1xCarbamidomethyl [C16]; 1xTMTpro [N-Term]	2.17624e-07	4.83621e-05	1	1	1	2	Q8C6G8 [303-321]	Q8C6G8 1xCarbamidomethyl [C318]	1	2530.34	1.014	0.797752	0.935877	1108.5	1093.7	7.5	1.91	1080.8	1169.7	982.7	1136.9	1088.7	1098.5	1133.1	1088.9		High	High	High	High	High	High	High	High	High	n/a	2.13e-05		1.667e-08		46		100
P35293	Ras-related protein Rab-18 OS=Mus musculus OX=10090 GN=Rab18 PE=1 SV=2	[K].LDNWLNELETYCTR.[N]	1xCarbamidomethyl [C12]; 1xTMTpro [N-Term]	7.85039e-07	4.83621e-05	1	1	1	2	P35293 [99-112]	P35293 1xCarbamidomethyl [C110]	0	2131.04	1.072	0.0341453	0.291888	2392	2231.8	4.03	3.04	2300.1	2477	2315.2	2471.3	2217.7	2141.7	2304.8	2245.9		High	High	High	High	High	High	High	High	High	n/a	2.13e-05		8.924e-08		20		100
Q91ZR1	Ras-related protein Rab-4B OS=Mus musculus OX=10090 GN=Rab4b PE=1 SV=2	[R].TLASPNIVVILCGNKK.[D]	1xCarbamidomethyl [C12]; 2xTMTpro [K15; K16]; 1xTMTpro [N-Term]	2.36557e-09	4.83621e-05	1	1	1	3	Q91ZR1 [108-123]	Q91ZR1 1xCarbamidomethyl [C119]	1	2639.61	0.906	0.407316	0.747413	4109.6	4536.6	17.46	10.13	4593.2	3461.6	4992.1	3677	4068.5	4252.3	4839.9	5032.4		High	High	High	High	High	High	High	High	High	n/a	2.13e-05		4.552e-11		54		100
Q3UTQ8	Cyclin-dependent kinase-like 5 OS=Mus musculus OX=10090 GN=Cdkl5 PE=1 SV=1	[K].LDPADRYLTEQCLNHPTFQTQR.[L]	1xCarbamidomethyl [C12]; 1xTMTpro [N-Term]	8.02696e-08	4.83621e-05	1	1	1	1	Q3UTQ8 [280-301]	Q3UTQ8 1xCarbamidomethyl [C291]	1	3007.5	0.979	0.678146	0.889555	735.7	751.8	16.18	17.45	701.4	771.6	546.7	803	589.1	697.6	886.4	810.3		High	High	High	High	High	High	High	High	High	n/a	2.13e-05		4.527e-09		21		100
Q61543	Golgi apparatus protein 1 OS=Mus musculus OX=10090 GN=Glg1 PE=1 SV=1	[K].LDPALQDKCLIDLGKWCSEK.[T]	2xCarbamidomethyl [C9; C17]; 3xTMTpro [K8; K15; K20]; 1xTMTpro [N-Term]	4.49705e-06	4.83621e-05	1	1	1	1	Q61543 [627-646]	Q61543 2xCarbamidomethyl [C635; C643]	2	3606.02	0.987	0.596257	0.852399	376.3	381.4	21.06	9.8	402.3	346.8	531.5	352	363.1	334.4	416.8	400.6		High	High	High	High	High	High	High	High	n/a	High		0.0003185		0.003133		4.49	100
Q8C167	Prolyl endopeptidase-like OS=Mus musculus OX=10090 GN=Prepl PE=1 SV=1	[K].LDQPFIDCIR.[V]	1xCarbamidomethyl [C8]; 1xTMTpro [N-Term]	1.48229e-05	4.83621e-05	1	1	1	2	Q8C167 [151-160]	Q8C167 1xCarbamidomethyl [C158]	0	1580.84	1.139	0.114895	0.457534	2149.2	1886.2	14.39	12.24	2116.3	2163.7	2800	2134.7	2288.3	1876.1	1731.3	1896.3		High	High	High	High	High	High	High	High	High	n/a	2.13e-05		4.22e-06		35		100
Q8VDD5; Q61879	Myosin-9 OS=Mus musculus OX=10090 GN=Myh9 PE=1 SV=4 Myosin-10 OS=Mus musculus OX=10090 GN=Myh10 PE=1 SV=2	[K].LDPHLVLDQLRCNGVLEGIR.[I]	1xCarbamidomethyl [C12]; 1xTMTpro [N-Term]	6.22115e-07	4.83621e-05	2	2	1	1	Q8VDD5 [683-702]; Q61879 [690-709]	Q8VDD5 1xCarbamidomethyl [C694]; Q61879 1xCarbamidomethyl [C701]	1	2621.45	1.008	0.587344	0.848447	663.3	657.8	7.08	7.28	595.7	672.8	706.8	654	659.2	749.5	656.5	641.2	Shared	High	High	High	High	High	High	High	High	High	n/a	2.13e-05		6.591e-08		18		100
P28474	Alcohol dehydrogenase class-3 OS=Mus musculus OX=10090 GN=Adh5 PE=1 SV=3	[K].IDPSAPLDKVCLLGCGISTGYGAAVNTAK.[V]	2xCarbamidomethyl [C11; C15]; 2xTMTpro [K9; K29]; 1xTMTpro [N-Term]	4.43524e-11	4.83621e-05	1	1	1	2	P28474 [160-188]	P28474 2xCarbamidomethyl [C170; C174]	1	3861.11	0.983	0.964117	0.989688	1815	1845.9	17.1	5.04	1830.6	1534	2301.5	1799.5	1907	1786.6	1769	1962.3		High	High	High	High	High	High	High	High	High	n/a	2.13e-05		2.513e-13		37		100
Q91W89	Alpha-mannosidase 2C1 OS=Mus musculus OX=10090 GN=Man2c1 PE=1 SV=1	[R].LDPTGCLTSLVLVASGR.[E]	1xCarbamidomethyl [C6]; 1xTMTpro [N-Term]	8.53722e-09	4.83621e-05	1	1	1	1	Q91W89 [697-713]	Q91W89 1xCarbamidomethyl [C702]	0	2063.15	1.255	0.0272091	0.270332	238.8	190.2	9.8	10.97	227.9	250.3	272.1	219.2	201.1	180	179.7	225.1		High	High	High	High	High	High	High	High	High	n/a	2.13e-05		2.426e-10		95		100
P80318	T-complex protein 1 subunit gamma OS=Mus musculus OX=10090 GN=Cct3 PE=1 SV=1	[K].TIADIIRTCLGPK.[S]	1xCarbamidomethyl [C9]; 1xTMTpro [K13]; 1xTMTpro [N-Term]	3.16406e-08	4.83621e-05	1	1	1	2	P80318 [32-44]	P80318 1xCarbamidomethyl [C40]	1	2066.23	0.942	0.356765	0.711901	3266.1	3467.6	9.7	4.6	3346.1	2998.4	3756	3188	3341.7	3718.3	3428.4	3507.3		High	High	High	High	High	High	High	High	High	n/a	2.13e-05		1.341e-09		22		100
Q9D1E6	Tubulin-folding cofactor B OS=Mus musculus OX=10090 GN=Tbcb PE=1 SV=2	[K].LDQEDALLGSYPVDDGCR.[I]	1xCarbamidomethyl [C17]; 1xTMTpro [N-Term]	7.68891e-10	4.83621e-05	1	1	1	2	Q9D1E6 [67-84]	Q9D1E6 1xCarbamidomethyl [C83]	0	2327.11	0.904	0.0205896	0.246298	889.5	983.8	5.81	4.88	928.9	854.9	925.5	826.3	954.2	963.4	1004.7	1060.8		High	High	High	High	High	High	High	High	High	n/a	2.13e-05		1.047e-11		61		100
Q9D1E6	Tubulin-folding cofactor B OS=Mus musculus OX=10090 GN=Tbcb PE=1 SV=2	[K].LDQEDALLGSYPVDDGCRIHVIDHSGVR.[L]	1xCarbamidomethyl [C17]; 1xTMTpro [N-Term]	1.3269e-06	4.83621e-05	1	1	1	1	Q9D1E6 [67-94]	Q9D1E6 1xCarbamidomethyl [C83]	1	3440.72	1.035	0.609596	0.858106	188	181.5	9.16	3.33	166.1	203.9	196.9	179.5	187.5	183.9	173.6	179.2		High	High	High	High	High	High	High	High	High	n/a	2.13e-05		6.699e-07		26		100
Q8BGX3	Leucine-rich repeat and transmembrane domain-containing protein 2 OS=Mus musculus OX=10090 GN=Lrtm2 PE=2 SV=1	[R].LDQLACTLPK.[E]	1xCarbamidomethyl [C6]; 1xTMTpro [K10]; 1xTMTpro [N-Term]	8.53352e-05	4.83621e-05	1	1	1	1	Q8BGX3 [223-232]	Q8BGX3 1xCarbamidomethyl [C228]	0	1767.03	1.104	0.0911045	0.422205	628.1	569.1	8.58	7.47	611.4	645.3	706.7	579.1	547	517.2	592.1	610.2		High	High	High	High	High	High	High	High	High	n/a	2.13e-05		4.682e-05		33		100
Q7TPR4	Alpha-actinin-1 OS=Mus musculus OX=10090 GN=Actn1 PE=1 SV=1	[K].IDQLECDHQLIQEALIFDNK.[H]	1xCarbamidomethyl [C6]; 1xTMTpro [K20]; 1xTMTpro [N-Term]	1.58452e-08	4.83621e-05	1	1	1	2	Q7TPR4 [685-704]	Q7TPR4 1xCarbamidomethyl [C690]	0	3050.61	0.745	0.0452547	0.323602	2023.6	2717.5	11.48	17.52	2217.9	1744.7	2178.8	1879.4	2124.2	2457.4	3005.2	3122.4		High	High	High	High	High	High	High	High	High	n/a	2.13e-05		5.455e-10		49		100
Q91ZR1	Ras-related protein Rab-4B OS=Mus musculus OX=10090 GN=Rab4b PE=1 SV=2	[R].TLASPNIVVILCGNK.[K]	1xCarbamidomethyl [C12]; 1xTMTpro [K15]; 1xTMTpro [N-Term]	4.11523e-10	4.83621e-05	1	1	1	5	Q91ZR1 [108-122]	Q91ZR1 1xCarbamidomethyl [C119]	0	2207.31	1.033	0.569308	0.839767	2717.2	2631.5	10.3	3.95	2695	2479.1	3160.8	2739.5	2592.2	2596.7	2666.8	2818		High	High	High	High	High	High	High	High	High	n/a	2.13e-05		4.623e-12		67		100
O55047	Serine/threonine-protein kinase tousled-like 2 OS=Mus musculus OX=10090 GN=Tlk2 PE=1 SV=2	[R].IDVQQLACDPYLLPHIR.[K]	1xCarbamidomethyl [C8]; 1xTMTpro [N-Term]	1.88661e-06	4.83621e-05	1	1	1	1	O55047 [676-692]	O55047 1xCarbamidomethyl [C683]	0	2355.28	0.952	0.730874	0.909965	175.7	184.5	7.84	7.32	177.1	193.5	159.8	174.2	189.1	185.6	183.5	160.2		High	High	High	High	High	High	High	High	High	n/a	2.13e-05		2.818e-07		49		100
P06909	Complement factor H OS=Mus musculus OX=10090 GN=Cfh PE=1 SV=2	[K].LDYECLVGFENEYK.[H]	1xCarbamidomethyl [C5]; 1xTMTpro [K14]; 1xTMTpro [N-Term]	3.57362e-05	4.83621e-05	1	1	1	1	P06909 [532-545]	P06909 1xCarbamidomethyl [C536]	0	2387.21	1.023	0.570656	0.840373	318.7	311.6	35.35	5.63	268.6	287.7	550.8	353.1	307.8	300	315.4	341		High	High	High	High	High	High	High	High	High	n/a	2.13e-05		1.384e-05		43		100
O54774	AP-3 complex subunit delta-1 OS=Mus musculus OX=10090 GN=Ap3d1 PE=1 SV=1	[K].LEDPDPGVQSAAVNVICELARR.[N]	1xCarbamidomethyl [C17]; 1xTMTpro [N-Term]	1.61944e-06	4.83621e-05	1	1	1	1	O54774 [192-213]	O54774 1xCarbamidomethyl [C208]	1	2713.43	1.023	0.335473	0.697862	673.9	658.6	9.57	3.68	646.6	674.5	795.9	673.4	658.4	688.8	629.3	658.9		High	High	High	High	High	High	High	High	High	n/a	2.13e-05		2.311e-07		19		100
O35245	Polycystin-2 OS=Mus musculus OX=10090 GN=Pkd2 PE=1 SV=2	[R].LEDQGAQCPSPAGGGDPLHR.[H]	1xCarbamidomethyl [C8]; 1xTMTpro [N-Term]	9.80273e-06	4.83621e-05	1	1	1	1	O35245 [155-174]	O35245 1xCarbamidomethyl [C162]	0	2366.15	1.136	0.44799	0.770523	189.6	166.9	6.87	20.03	165.6	190.2	193.1	189.1	208.4	190.9	138.1	145.8		High	High	High	High	High	High	High	High	High	Low	2.13e-05	0.9514	2.451e-06	1	32	1.73	100
Q3TEA8	Heterochromatin protein 1-binding protein 3 OS=Mus musculus OX=10090 GN=Hp1bp3 PE=1 SV=1	[K].LEDVLPLAFTRLCEPK.[E]	1xCarbamidomethyl [C13]; 1xTMTpro [K16]; 1xTMTpro [N-Term]	5.44676e-07	4.83621e-05	1	1	1	2	Q3TEA8 [259-274]	Q3TEA8 1xCarbamidomethyl [C271]	1	2509.43	1.135	0.15909	0.521207	2272.2	2002.7	7.68	18.31	2337.7	1961.1	2287.7	2256.9	1345.1	2037	2050.8	1968.9		High	High	High	High	High	High	High	High	High	n/a	2.13e-05		5.521e-08		30		100
Q9DB05	Alpha-soluble NSF attachment protein OS=Mus musculus OX=10090 GN=Napa PE=1 SV=1	[K].IEEACEIYAR.[A]	1xCarbamidomethyl [C5]; 1xTMTpro [N-Term]	2.62896e-06	4.83621e-05	1	1	1	3	Q9DB05 [38-47]	Q9DB05 1xCarbamidomethyl [C42]	0	1557.79	0.92	0.453887	0.774296	1808.6	1965.7	6.95	10.43	1837.5	1780.1	1626.7	1922.3	1607	1918.5	2013.9	2034.3		High	High	High	High	High	High	High	High	High	Low	2.13e-05	0.951	4.329e-07	1	38	1.13	100
P28663	Beta-soluble NSF attachment protein OS=Mus musculus OX=10090 GN=Napb PE=1 SV=2	[R].IEEACEMYTR.[A]	1xCarbamidomethyl [C5]; 1xTMTpro [N-Term]	3.20593e-05	4.83621e-05	1	1	1	2	P28663 [38-47]	P28663 1xCarbamidomethyl [C42]	0	1605.76	3.553	3.08272e-05	0.0437254	3012.8	848	14.24	15.79	2805.6	3255.2	2378.2	3235.4	647.5	847.2	848.7	961.1		High	High	High	High	High	High	High	High	High	High	2.13e-05	0.002723	1.188e-05	0.1163	56	1.19	100
Q8BQ47	Protein canopy homolog 4 OS=Mus musculus OX=10090 GN=Cnpy4 PE=1 SV=1	[R].LEEALENLCER.[I]	1xCarbamidomethyl [C9]; 1xTMTpro [N-Term]	7.20064e-07	4.83621e-05	1	1	1	2	Q8BQ47 [92-102]	Q8BQ47 1xCarbamidomethyl [C100]	0	1679.86	0.885	0.00819749	0.177799	746.6	844.1	3.21	4.68	739.5	731.2	786.1	753.8	888.1	870.6	818.4	806.5		High	High	High	High	High	High	High	High	High	n/a	2.13e-05		7.999e-08		41		100
Q69ZH9	Rho GTPase-activating protein 23 OS=Mus musculus OX=10090 GN=Arhgap23 PE=1 SV=2	[R].LEECQPATENQR.[V]	1xCarbamidomethyl [C4]; 1xTMTpro [N-Term]	6.70778e-08	4.83621e-05	1	1	1	2	Q69ZH9 [903-914]	Q69ZH9 1xCarbamidomethyl [C906]	0	1778.87	0.946	0.297969	0.665455	801	846.6	2.68	9.14	796.6	805.4	763.5	811.1	765.9	790.2	914	907		High	High	High	High	High	High	High	High	High	Low	2.13e-05	0.9093	3.581e-09	1	57	0.96	100
Q69ZH9	Rho GTPase-activating protein 23 OS=Mus musculus OX=10090 GN=Arhgap23 PE=1 SV=2	[R].LEECQPATENQRVPLIVAACCR.[I]	3xCarbamidomethyl [C4; C20; C21]; 1xTMTpro [N-Term]	1.30939e-06	4.83621e-05	1	1	1	1	Q69ZH9 [903-924]	Q69ZH9 3xCarbamidomethyl [C906; C922; C923]	1	2918.46	1.093	0.00351389	0.141361	338.2	309.2	2.61	2.06	326.1	342.8	345.3	333.6	320.3	305.6	308.2	310.3		High	High	High	High	High	High	High	High	High	n/a	2.13e-05		1.748e-07		21		100
Q8CDG3	Deubiquitinating protein VCPIP1 OS=Mus musculus OX=10090 GN=Vcpip1 PE=1 SV=1	[K].LEEDGGCVIGGDR.[S]	1xCarbamidomethyl [C7]; 1xTMTpro [N-Term]	1.63509e-07	4.83621e-05	1	1	1	3	Q8CDG3 [390-402]	Q8CDG3 1xCarbamidomethyl [C396]	0	1680.82	1.011	0.846054	0.95205	1353.9	1339.5	11.23	5.3	1353.4	1354.5	1101	1443.2	1312.6	1232	1390.3	1366.9		High	High	High	High	High	High	High	High	High	n/a	2.13e-05		1.152e-08		48		100
Q9R1V6	Disintegrin and metalloproteinase domain-containing protein 22 OS=Mus musculus OX=10090 GN=Adam22 PE=1 SV=2	[K].LEEDVDLGYVEDGTPCGPQMMCLEHR.[C]	2xCarbamidomethyl [C16; C22]; 1xTMTpro [N-Term]	6.71969e-09	4.83621e-05	1	1	1	2	Q9R1V6 [640-665]	Q9R1V6 2xCarbamidomethyl [C655; C661]	0	3354.51	1.033	0.506688	0.804679	283.1	274	4.2	7.33	278	304	278.9	287.3	307.8	260.2	277.1	271		High	High	High	High	High	High	High	High	High	n/a	2.13e-05		1.781e-10		76		100
O08529	Calpain-2 catalytic subunit OS=Mus musculus OX=10090 GN=Capn2 PE=1 SV=4	[K].LEEEDEDEEDGERGCTFLVGLIQK.[H]	1xCarbamidomethyl [C15]; 1xTMTpro [K24]; 1xTMTpro [N-Term]	2.85466e-10	4.83621e-05	1	1	1	4	O08529 [391-414]	O08529 1xCarbamidomethyl [C405]	1	3418.68	0.981	0.812827	0.940677	2218.2	2260.5	9.95	8.12	2357.6	2052.3	2521.8	2087	2103.5	2341.2	2182.5	2523.7		High	High	High	High	High	High	High	High	High	n/a	2.13e-05		2.869e-12		45		100
O54774	AP-3 complex subunit delta-1 OS=Mus musculus OX=10090 GN=Ap3d1 PE=1 SV=1	[K].LEDPDPGVQSAAVNVICELAR.[R]	1xCarbamidomethyl [C17]; 1xTMTpro [N-Term]	1.03562e-12	4.83621e-05	1	1	1	6	O54774 [192-212]	O54774 1xCarbamidomethyl [C208]	0	2557.33	1.039	0.16672	0.529841	3013.5	2900.8	8.51	3.25	2951.2	3033.9	3520.4	2993.2	2778.9	2991.7	2858.4	2943.8		High	High	High	High	High	High	High	High	High	Low	2.13e-05	0.806	1.843e-15	1	154	2.16	100
Q6ZPS2	Carnosine synthase 1 OS=Mus musculus OX=10090 GN=Carns1 PE=1 SV=2	[K].LEEEESVLVEAMCPPVR.[L]	1xCarbamidomethyl [C13]; 1xTMTpro [N-Term]	2.22015e-05	4.83621e-05	1	1	1	1	Q6ZPS2 [199-215]	Q6ZPS2 1xCarbamidomethyl [C211]	0	2291.16	1.22	0.000449128	0.0887932	423.3	347.1	2.86	4.16	419.9	430.3	403.2	426.8	347.5	326.9	346.6	361.9		High	High	High	High	High	High	High	High	High	Low	2.13e-05	0.9644	7.258e-06	1	44	2.98	100
E9Q735	Ubiquitin conjugation factor E4 A OS=Mus musculus OX=10090 GN=Ube4a PE=1 SV=1	[R].THQEMCEQLNINHMIQR.[I]	1xCarbamidomethyl [C6]; 1xTMTpro [N-Term]	2.91218e-10	4.83621e-05	1	1	1	4	E9Q735 [74-90]	E9Q735 1xCarbamidomethyl [C79]	0	2486.2	1.014	0.952051	0.986839	1062.3	1047.5	4.82	8.04	1048.7	1136.8	1015.1	1076.1	1195.9	1072.5	1004	1023		High	High	High	High	High	High	High	High	High	High	2.13e-05	0.0005594	2.937e-12	0.02745	47	2.59	100
P46460	Vesicle-fusing ATPase OS=Mus musculus OX=10090 GN=Nsf PE=1 SV=2	[R].THPSVVPGCIAFSLPQRK.[W]	1xCarbamidomethyl [C9]; 1xTMTpro [K18]; 1xTMTpro [N-Term]	3.29382e-06	4.83621e-05	1	1	1	2	P46460 [51-68]	P46460 1xCarbamidomethyl [C59]	1	2602.48	1.184	0.338667	0.700421	989.3	835.4	32.61	30.44	1558.4	1183.6	801	826.9	579.8	778.5	896.5	1209.5		High	High	High	High	High	High	High	High	High	High	2.13e-05	0.001607	5.831e-07	0.0762	25	1.99	100
A2RT62	F-box/LRR-repeat protein 16 OS=Mus musculus OX=10090 GN=Fbxl16 PE=1 SV=1	[R].LEELVLDRCVR.[I]	1xCarbamidomethyl [C9]; 1xTMTpro [N-Term]	7.75973e-05	4.83621e-05	1	1	1	1	A2RT62 [374-384]	A2RT62 1xCarbamidomethyl [C382]	1	1705.96	0.861	0.0160655	0.224274	470.6	546.4	6.35	4.7	449.2	481.9	517.6	459.6	512.3	546.9	574.9	546		High	High	High	High	High	High	High	High	High	n/a	2.13e-05		4.091e-05		23		100
Q8BQP9	Regulator of G-protein signaling 7-binding protein OS=Mus musculus OX=10090 GN=Rgs7bp PE=1 SV=1	[K].IEENAETPALEDSLSSPLESQQQCWQVATDIENTER.[D]	1xCarbamidomethyl [C24]; 1xTMTpro [N-Term]	2.43666e-07	4.83621e-05	1	1	1	1	Q8BQP9 [169-204]	Q8BQP9 1xCarbamidomethyl [C192]	0	4422.09	0.348	3.95706e-05	0.0437254	76.1	218.3	14.4	12.53	90.7	75.9	63.8	76.3	189.1	199.1	239.4	242.1		High	High	High	High	High	High	High	High	High	n/a	2.13e-05		1.934e-08		33		100
Q9JL04	Formin-2 OS=Mus musculus OX=10090 GN=Fmn2 PE=1 SV=2	[K].IEEPSIDCHEFEELFSK.[T]	1xCarbamidomethyl [C8]; 1xTMTpro [K17]; 1xTMTpro [N-Term]	8.86887e-08	4.83621e-05	1	1	1	1	Q9JL04 [1174-1190]	Q9JL04 1xCarbamidomethyl [C1181]	0	2717.36	0.892	0.219112	0.589475	921.3	1032.3	6.79	12.2	1003	892.3	951.1	861.2	881.1	975.1	1164.6	1092.8		High	High	High	High	High	High	High	High	High	n/a	2.13e-05		5.157e-09		48		100
Q8K1M6	Dynamin-1-like protein OS=Mus musculus OX=10090 GN=Dnm1l PE=1 SV=2	[R].LEEPSLRCVELVHEEMQR.[I]	1xCarbamidomethyl [C8]; 1xTMTpro [N-Term]	1.87413e-06	4.83621e-05	1	1	1	2	Q8K1M6 [430-447]	Q8K1M6 1xCarbamidomethyl [C437]	1	2558.3	1.034	0.499306	0.80066	1094.8	1058.4	4.49	3.27	1063.5	1146.2	1043.8	1127	1050	1057.1	1125.3	1059.8		High	High	High	High	High	High	High	High	High	n/a	2.13e-05		2.78e-07		22		100
Q8K010	5-oxoprolinase OS=Mus musculus OX=10090 GN=Oplah PE=1 SV=1	[R].LEEQCVDALQAQGFSR.[S]	1xCarbamidomethyl [C5]; 1xTMTpro [N-Term]	1.54293e-08	4.83621e-05	1	1	1	2	Q8K010 [554-569]	Q8K010 1xCarbamidomethyl [C558]	0	2155.08	1.093	0.0310742	0.28547	1066.1	975.8	5.51	4.43	1100.8	1153.4	1029.7	1032.6	936.7	1015.3	941	1011.9		High	High	High	High	High	High	High	High	High	Low	2.13e-05	0.9185	5.256e-10	1	36	2.04	100
Q9JLI8	Squamous cell carcinoma antigen recognized by T-cells 3 OS=Mus musculus OX=10090 GN=Sart3 PE=1 SV=1	[R].LEEQLSINGYDYNCHVELIR.[L]	1xCarbamidomethyl [C14]; 1xTMTpro [N-Term]	1.75683e-10	4.83621e-05	1	1	1	1	Q9JLI8 [102-121]	Q9JLI8 1xCarbamidomethyl [C115]	0	2769.38	1.059	0.510712	0.806758	539	508.9	6.26	4.92	480.1	531.4	552.9	546.6	526.1	541.6	490.9	492.2		High	High	High	High	High	High	High	High	High	n/a	2.13e-05		1.512e-12		76		100
Q6P9K8	Caskin-1 OS=Mus musculus OX=10090 GN=Caskin1 PE=1 SV=2	[K].LEETSACLAAALQAVEEK.[I]	1xCarbamidomethyl [C7]; 1xTMTpro [K18]; 1xTMTpro [N-Term]	1.36639e-07	4.83621e-05	1	1	1	1	Q6P9K8 [1372-1389]	Q6P9K8 1xCarbamidomethyl [C1378]	0	2541.37	1.044	0.556667	0.833771	449.5	430.7	5.36	9.59	427.3	432.7	475.5	467	427.6	391.5	492.6	433.8		High	High	High	High	High	High	High	High	High	n/a	2.13e-05		9.079e-09		34		100
Q9QYB1	Chloride intracellular channel protein 4 OS=Mus musculus OX=10090 GN=Clic4 PE=1 SV=3	[K].IEEFLEEVLCPPK.[Y]	1xCarbamidomethyl [C10]; 1xTMTpro [K13]; 1xTMTpro [N-Term]	1.66303e-06	4.83621e-05	1	1	1	1	Q9QYB1 [91-103]	Q9QYB1 1xCarbamidomethyl [C100]	0	2211.22	0.879	0.109608	0.451217	399	454	10.73	3.38	408.6	370.3	471.7	389.6	460.2	446.4	448	480		High	High	High	High	High	High	High	High	High	n/a	2.13e-05		2.381e-07		53		100
Q8C079	Striatin-interacting protein 1 OS=Mus musculus OX=10090 GN=Strip1 PE=1 SV=2	[R].THSNPDFLPVDNCLQSVLGQR.[V]	1xCarbamidomethyl [C13]; 1xTMTpro [N-Term]	2.80713e-08	4.83621e-05	1	1	1	1	Q8C079 [786-806]	Q8C079 1xCarbamidomethyl [C798]	0	2701.37	0.984	0.116581	0.460431	418.1	424.7	0.74	1.78	419.3	412.5	417.5	418.6	425.7	416.4	434.8	423.6		High	High	High	High	High	High	High	High	High	Low	2.13e-05	0.9637	1.147e-09	1	77	4.31	100
Q91YJ3	Thymocyte nuclear protein 1 OS=Mus musculus OX=10090 GN=Thyn1 PE=1 SV=1	[K].LEDEAFFYHSNCK.[Q]	1xCarbamidomethyl [C12]; 1xTMTpro [K13]; 1xTMTpro [N-Term]	4.26504e-06	4.83621e-05	1	1	1	1	Q91YJ3 [108-120]	Q91YJ3 1xCarbamidomethyl [C119]	0	2268.13	1.126	0.0640116	0.369868	565.9	502.7	6.15	11.12	573	558.8	612.5	528.4	407.1	529.1	495.9	509.5		High	High	High	High	High	High	High	High	High	n/a	2.13e-05		8.162e-07		23		100
P28352	DNA-(apurinic or apyrimidinic site) endonuclease OS=Mus musculus OX=10090 GN=Apex1 PE=1 SV=2	[R].LDYFLLSHSLLPALCDSK.[I]	1xCarbamidomethyl [C15]; 1xTMTpro [K18]; 1xTMTpro [N-Term]	1.73912e-08	4.83621e-05	1	1	1	3	P28352 [281-298]	P28352 1xCarbamidomethyl [C295]	0	2700.49	1.152	0.0152163	0.219072	1783	1547.4	8.4	5.82	1779.2	1769.3	2090.1	1786.7	1463.1	1575.6	1519.7	1676.1		High	High	High	High	High	High	High	High	High	High	2.13e-05	0.0003185	6.126e-10	0.009241	40	4.45	100
Q8BNJ6	Neuropilin and tolloid-like protein 2 OS=Mus musculus OX=10090 GN=Neto2 PE=1 SV=1	[K].TKPGQAVDCIWTIK.[A]	1xCarbamidomethyl [C9]; 2xTMTpro [K2; K14]; 1xTMTpro [N-Term]	3.71155e-08	4.83621e-05	1	1	1	1	Q8BNJ6 [199-212]	Q8BNJ6 1xCarbamidomethyl [C207]	1	2529.47	0.967	0.781216	0.9303	1227.9	1269.6	5.6	23.46	1279.6	1129.3	1260.5	1196.3	973.5	1094.4	1609.2	1472.9		High	High	High	High	High	High	High	High	High	n/a	2.13e-05		1.662e-09		37		100
Q9D6R2	Isocitrate dehydrogenase [NAD] subunit alpha, mitochondrial OS=Mus musculus OX=10090 GN=Idh3a PE=1 SV=1	[K].IEAACFATIK.[D]	1xCarbamidomethyl [C5]; 1xTMTpro [K10]; 1xTMTpro [N-Term]	1.21713e-06	4.83621e-05	1	1	1	7	Q9D6R2 [327-336]	Q9D6R2 1xCarbamidomethyl [C331]	0	1732	0.981	0.926234	0.979807	5914	6027.4	6.79	4.95	6456	5785.7	5505.7	6045.1	5583.8	5889.8	6168.3	6229		High	High	High	High	High	High	High	High	High	High	2.13e-05	0.0003185	1.582e-07	0.005045	49	2.01	100
Q9DBR0	A-kinase anchor protein 8 OS=Mus musculus OX=10090 GN=Akap8 PE=1 SV=1	[K].IEAAHCLACDMLIPAQHQLLQR.[H]	2xCarbamidomethyl [C6; C9]; 1xTMTpro [N-Term]	3.35265e-07	4.83621e-05	1	1	1	1	Q9DBR0 [473-494]	Q9DBR0 2xCarbamidomethyl [C478; C481]	0	2892.5	1.108	0.592017	0.850435	499.3	450.6	7.28	11.47	441.9	526.9	498.8	499.9	556.4	448.5	442.1	452.6		High	High	High	High	High	High	High	High	High	n/a	2.13e-05		2.948e-08		34		100
O88448	Kinesin light chain 2 OS=Mus musculus OX=10090 GN=Klc2 PE=1 SV=1	[K].LEAAHTLEDCASR.[S]	1xCarbamidomethyl [C10]; 1xTMTpro [N-Term]	8.18718e-05	4.83621e-05	1	1	1	1	O88448 [463-475]	O88448 1xCarbamidomethyl [C472]	0	1776.89	1.109	0.0333189	0.290305	395.5	356.7	2.78	4.53	375.1	394.2	396.8	398.5	386.9	356.8	356.5	350.3		High	High	High	High	High	High	High	High	High	Low	2.13e-05	0.9547	4.404e-05	1	48	0.89	100
Q9CQV8	14-3-3 protein beta/alpha OS=Mus musculus OX=10090 GN=Ywhab PE=1 SV=3	[K].IEAELQDICNDVLELLDK.[Y]	1xCarbamidomethyl [C9]; 1xTMTpro [K18]; 1xTMTpro [N-Term]	2.27304e-09	4.83621e-05	1	1	1	2	Q9CQV8 [88-105]	Q9CQV8 1xCarbamidomethyl [C96]	0	2738.48	0.862	0.995071	0.998402	949.4	1101.5	27.26	20.03	1009.4	806.3	1443.8	893	729.6	1073.9	1129.9	1190.4		High	High	High	High	High	High	High	High	High	n/a	2.13e-05		4.301e-11		75		100
P07901	Heat shock protein HSP 90-alpha OS=Mus musculus OX=10090 GN=Hsp90aa1 PE=1 SV=4	[K].TKFENLCK.[I]	1xCarbamidomethyl [C7]; 2xTMTpro [K2; K8]; 1xTMTpro [N-Term]	6.51245e-05	4.83621e-05	1	1	1	1	P07901 [567-574]	P07901 1xCarbamidomethyl [C573]	1	1952.15	0.748	0.463707	0.780884	827.7	1107	40.44	14.75	899.1	674.3	1539.9	762	872.7	1097.9	1116.2	1260.7		High	High	High	High	High	High	High	High	n/a	High		0.0003185		0.01298		2.46	100
P55194	SH3 domain-binding protein 1 OS=Mus musculus OX=10090 GN=Sh3bp1 PE=1 SV=3	[R].LEALHDVCSRLPQENFNNLR.[Y]	1xCarbamidomethyl [C8]; 1xTMTpro [N-Term]	1.97635e-06	4.83621e-05	1	1	1	1	P55194 [381-400]	P55194 1xCarbamidomethyl [C388]	1	2729.41	1.369	0.00580178	0.159301	561.1	410	9.96	3.78	483.7	564.9	618.4	557.3	410	410	390.4	428.4		High	High	High	High	High	High	High	High	High	n/a	2.13e-05		2.993e-07		37		100
Q8BGH2	Sorting and assembly machinery component 50 homolog OS=Mus musculus OX=10090 GN=Samm50 PE=1 SV=1	[R].TKDDIIICEIGEVFK.[A]	1xCarbamidomethyl [C8]; 2xTMTpro [K2; K15]; 1xTMTpro [N-Term]	2.8828e-08	4.83621e-05	1	1	1	4	Q8BGH2 [58-72]	Q8BGH2 1xCarbamidomethyl [C65]	1	2692.54	1.018	0.962559	0.989326	4017.3	3945.7	17.31	9.36	4425.3	3118.7	4572.8	3646.8	3520	3717.7	4187.8	4284.8		High	High	High	High	High	High	High	High	High	n/a	2.13e-05		1.192e-09		43		100
Q60872	Eukaryotic translation initiation factor 1A OS=Mus musculus OX=10090 GN=Eif1a PE=2 SV=3	[R].LEAMCFDGVR.[R]	1xCarbamidomethyl [C5]; 1xTMTpro [N-Term]	2.49453e-05	4.83621e-05	1	1	1	1	Q60872 [47-56]	Q60872 1xCarbamidomethyl [C51]	0	1501.75	0.995	0.640007	0.871941	1113.8	1119.6	11.87	9.67	1105.3	1122.4	869.4	1130.8	953.6	1086.1	1196.4	1154.1		High	High	High	High	High	High	High	High	High	n/a	2.13e-05		8.516e-06		35		100
Q6NVG1	Lysophospholipid acyltransferase LPCAT4 OS=Mus musculus OX=10090 GN=Lpcat4 PE=1 SV=1	[R].LEAPVLVAAPHSTFFDPIVLLPCDLPK.[V]	1xCarbamidomethyl [C23]; 1xTMTpro [K27]; 1xTMTpro [N-Term]	1.25324e-07	4.83621e-05	1	1	1	1	Q6NVG1 [119-145]	Q6NVG1 1xCarbamidomethyl [C141]	0	3568.01	0.942	0.0823169	0.407522	450.3	477.7	5.37	3.11	450.9	449.6	410.8	467	491.4	472	483.5	457.3		High	High	High	High	High	High	High	High	High	Low	2.13e-05	0.9593	8.092e-09	1	51	2.07	100
E9Q401	Ryanodine receptor 2 OS=Mus musculus OX=10090 GN=Ryr2 PE=1 SV=1	[R].LEASSGILEVLHCVLVESPEALNIIK.[E]	1xCarbamidomethyl [C13]; 1xTMTpro [K26]; 1xTMTpro [N-Term]	2.42051e-07	4.83621e-05	1	1	1	1	E9Q401 [565-590]	E9Q401 1xCarbamidomethyl [C577]	0	3441.95	0.934	0.30713	0.673325	322.7	345.6	3.34	8.65	321.9	318.4	342.7	323.6	316.9	323.1	369.8	373.3		High	High	High	High	High	High	High	High	High	n/a	2.13e-05		1.922e-08		38		100
O54865	Guanylate cyclase soluble subunit beta-1 OS=Mus musculus OX=10090 GN=Gucy1b1 PE=1 SV=1	[K].LECEDELTGAEISCLR.[L]	2xCarbamidomethyl [C3; C14]; 1xTMTpro [N-Term]	4.85107e-09	4.83621e-05	1	1	1	2	O54865 [290-305]	O54865 2xCarbamidomethyl [C292; C303]	0	2199.06	1.103	0.0547044	0.348488	930.1	843	3.05	8.69	911.6	926.3	977.9	934	884.8	724.6	820	866.5		High	High	High	High	High	High	High	High	High	Low	2.13e-05	0.964	1.163e-10	1	28	2.36	100
Q8BNN1	Spermatogenesis-associated protein 2-like protein OS=Mus musculus OX=10090 GN=Spata2l PE=1 SV=1	[R].LECEILSEVLTQLGTSVLPAEELLR.[A]	1xCarbamidomethyl [C3]; 1xTMTpro [N-Term]	4.56122e-08	4.83621e-05	1	1	1	1	Q8BNN1 [160-184]	Q8BNN1 1xCarbamidomethyl [C162]	0	3116.71	1.06	0.316758	0.68218	148.1	139.8	11.96	6.88	132	173.6	154.9	141.7	144.4	135.3	148.8	127.3		High	High	High	High	High	High	High	High	High	n/a	2.13e-05		2.167e-09		43		100
Q921I1	Serotransferrin OS=Mus musculus OX=10090 GN=Tf PE=1 SV=1	[K].IECESAETTEDCIEK.[I]	2xCarbamidomethyl [C3; C12]; 1xTMTpro [K15]; 1xTMTpro [N-Term]	3.60701e-07	4.83621e-05	1	1	1	1	Q921I1 [384-398]	Q921I1 2xCarbamidomethyl [C386; C395]	0	2422.16	1.379	0.12054	0.466367	371.7	269.6	60.58	8.7	371.2	351.4	998.9	372.2	262.3	251.6	277.1	306.6		High	High	High	High	High	High	High	High	High	n/a	2.13e-05		3.24e-08		52		100
Q9D009	Putative lipoyltransferase 2, mitochondrial OS=Mus musculus OX=10090 GN=Lipt2 PE=1 SV=2	[R].THVAALEACAVR.[L]	1xCarbamidomethyl [C9]; 1xTMTpro [N-Term]	0.000114419	4.83621e-05	1	1	1	1	Q9D009 [114-125]	Q9D009 1xCarbamidomethyl [C122]	0	1601.88	1.094	0.481015	0.790149	845.7	772.7	7.32	10.11	832.4	897.2	752.7	859.1	914.1	752.1	793.9	735		High	High	High	High	High	High	High	High	High	n/a	2.13e-05		7.314e-05		43		100
Q9JMB8	Contactin-6 OS=Mus musculus OX=10090 GN=Cntn6 PE=1 SV=2	[K].LECFALGNPVPDISWK.[R]	1xCarbamidomethyl [C3]; 1xTMTpro [K16]; 1xTMTpro [N-Term]	1.0944e-06	4.83621e-05	1	1	1	1	Q9JMB8 [247-262]	Q9JMB8 1xCarbamidomethyl [C249]	0	2454.33	0.994	0.761011	0.922374	645.9	649.5	5.58	9	627.4	633.9	708.2	658.1	586	700.4	693.2	608.6		High	High	High	High	High	High	High	High	High	n/a	2.13e-05		1.384e-07		40		100
Q07409	Contactin-3 OS=Mus musculus OX=10090 GN=Cntn3 PE=1 SV=2	[R].LECFALGNPVPQINWR.[R]	1xCarbamidomethyl [C3]; 1xTMTpro [N-Term]	9.37018e-09	4.83621e-05	1	1	1	3	Q07409 [247-262]	Q07409 1xCarbamidomethyl [C249]	0	2218.18	0.915	0.112911	0.455773	835.7	913.9	5.44	6.73	806.9	886.6	791.8	865.7	898.5	831.7	977.6	929.5		High	High	High	High	High	High	High	High	High	n/a	2.13e-05		2.746e-10		49		100
Q9CZY3	Ubiquitin-conjugating enzyme E2 variant 1 OS=Mus musculus OX=10090 GN=Ube2v1 PE=1 SV=1	[K].IECGPKYPEAPPSVR.[F]	1xCarbamidomethyl [C3]; 1xTMTpro [K6]; 1xTMTpro [N-Term]	1.60872e-06	4.83621e-05	1	1	1	1	Q9CZY3 [69-83]	Q9CZY3 1xCarbamidomethyl [C71]	1	2308.26	0.875	0.443773	0.767991	1176.5	1343.9	7.93	13.51	1324.6	1101	1194.8	1158.6	1032.9	1324.2	1364	1424.1		High	High	High	High	High	High	High	High	High	n/a	2.13e-05		2.275e-07		29		100
P61963	DDB1- and CUL4-associated factor 7 OS=Mus musculus OX=10090 GN=Dcaf7 PE=1 SV=1	[R].LECLLNNNK.[N]	1xCarbamidomethyl [C3]; 1xTMTpro [K9]; 1xTMTpro [N-Term]	2.62676e-05	4.83621e-05	1	1	1	2	P61963 [107-115]	P61963 1xCarbamidomethyl [C109]	0	1725.98	1.056	0.612279	0.859272	2162.7	2048	9.82	3.98	2368.3	2048.2	2283.5	1908.8	2031	2047.3	2048.8	2207.5		High	High	High	High	High	High	High	High	High	n/a	2.13e-05		9.111e-06		39		100
Q4KUS2	Protein unc-13 homolog A OS=Mus musculus OX=10090 GN=Unc13a PE=1 SV=3	[K].LECPDPQIVGHYMR.[R]	1xCarbamidomethyl [C3]; 1xTMTpro [N-Term]	1.646e-07	4.83621e-05	1	1	1	2	Q4KUS2 [1215-1228]	Q4KUS2 1xCarbamidomethyl [C1217]	0	2019.01	1.126	0.762626	0.922809	937.6	833	14.84	41.7	876.3	1022	730.7	1003.2	1640.3	904.9	746.3	766.8		High	High	High	High	High	High	High	High	High	High	2.13e-05	0.0005594	1.157e-08	0.02824	33	1.57	100
Q69ZH9	Rho GTPase-activating protein 23 OS=Mus musculus OX=10090 GN=Arhgap23 PE=1 SV=2	[R].LECQQALSHWLSNQIPR.[R]	1xCarbamidomethyl [C3]; 1xTMTpro [N-Term]	6.85509e-09	4.83621e-05	1	1	1	1	Q69ZH9 [282-298]	Q69ZH9 1xCarbamidomethyl [C284]	0	2384.25	1.007	0.590602	0.849794	550.6	546.6	5.09	4.95	552.8	548.3	528.9	596.1	527.9	517.1	571	565.9		High	High	High	High	High	High	High	High	High	n/a	2.13e-05		1.828e-10		90		100
Q68FD5	Clathrin heavy chain 1 OS=Mus musculus OX=10090 GN=Cltc PE=1 SV=3	[K].LECSEELGDLVK.[S]	1xCarbamidomethyl [C3]; 1xTMTpro [K12]; 1xTMTpro [N-Term]	5.38615e-08	4.83621e-05	1	1	1	3	Q68FD5 [457-468]	Q68FD5 1xCarbamidomethyl [C459]	0	2000.09	1.034	0.513192	0.808663	2169.4	2097.1	8.95	8.01	2333.2	1901	2086.7	2255.3	1824.7	2045.3	2150.2	2192.9		High	High	High	High	High	High	High	High	High	n/a	2.13e-05		2.686e-09		54		100
Q9D8B4	NADH dehydrogenase [ubiquinone] 1 alpha subcomplex subunit 11 OS=Mus musculus OX=10090 GN=Ndufa11 PE=1 SV=2	[R].THSYGTAAMGCVYMGTAAALFK.[I]	1xCarbamidomethyl [C11]; 1xTMTpro [K22]; 1xTMTpro [N-Term]	1.38041e-09	4.83621e-05	1	1	1	1	Q9D8B4 [105-126]	Q9D8B4 1xCarbamidomethyl [C115]	0	2916.47	1.089	0.116041	0.459584	285.3	261.9	3.15	7.03	291.3	297.7	279.5	279.5	291.7	254.2	250.5	269.9		High	High	High	High	High	High	High	High	High	n/a	2.13e-05		2.236e-11		48		100
Q8BGQ7	Alanine--tRNA ligase, cytoplasmic OS=Mus musculus OX=10090 GN=Aars1 PE=1 SV=1	[K].THSPQTSAMLFTVDNEAGKITCLCQVPQNAANR.[G]	2xCarbamidomethyl [C22; C24]; 1xTMTpro [K19]; 1xTMTpro [N-Term]	4.48681e-10	4.83621e-05	1	1	1	3	Q8BGQ7 [880-912]	Q8BGQ7 2xCarbamidomethyl [C901; C903]	1	4268.15	0.885	0.60884	0.857776	772.9	873	15.6	17.71	786.3	759.7	926.2	631	621.7	884.8	861.4	964		High	High	High	High	High	High	High	High	High	n/a	2.13e-05		5.149e-12		52		100
Q8CGC7	Bifunctional glutamate/proline--tRNA ligase OS=Mus musculus OX=10090 GN=Eprs1 PE=1 SV=4	[K].IDMSSNNGCMRDPTLYR.[C]	1xCarbamidomethyl [C9]; 1xTMTpro [N-Term]	3.33137e-05	4.83621e-05	1	1	1	1	Q8CGC7 [342-358]	Q8CGC7 1xCarbamidomethyl [C350]	1	2334.1	0.905	0.144745	0.503293	170.9	189	4.83	5.99	185.6	173	166.9	169	192.2	169.7	194.2	185.8		High	High	High	High	High	High	High	High	n/a	High		0.003529		0.1478		2.2	100
O08582	GTP-binding protein 1 OS=Mus musculus OX=10090 GN=Gtpbp1 PE=1 SV=2	[K].IDMCPANILQETLK.[L]	1xCarbamidomethyl [C4]; 1xTMTpro [K14]; 1xTMTpro [N-Term]	1.37028e-05	4.83621e-05	1	1	1	1	O08582 [310-323]	O08582 1xCarbamidomethyl [C313]	0	2254.24	1.08	0.0295444	0.278814	496.7	459.9	4.72	4.39	502	491.5	540.7	489.2	441.7	449.3	486.2	470.7		High	High	High	High	High	High	High	High	High	n/a	2.13e-05		3.822e-06		44		100
B1AUN2	Eukaryotic translation initiation factor 2B, subunit 3 OS=Mus musculus OX=10090 GN=Eif2b3 PE=1 SV=1	[K].LDIVCIPDEADMGTADSLR.[H]	1xCarbamidomethyl [C5]; 1xTMTpro [N-Term]	7.71345e-05	4.83621e-05	1	1	1	3	B1AUN2 [73-91]	B1AUN2 1xCarbamidomethyl [C77]	0	2395.18	0.949	0.0583863	0.358007	1560.2	1644.6	1.94	4.78	1529.3	1560.9	1603.2	1559.4	1786.9	1621.8	1667.7	1613.3		High	High	High	High	High	High	High	High	n/a	High		0.0003185		4.412e-05		5.13	100
Q8BNW9	Kelch repeat and BTB domain-containing protein 11 OS=Mus musculus OX=10090 GN=Kbtbd11 PE=1 SV=3	[R].LCTGRACLLAAALGTTGER.[S]	2xCarbamidomethyl [C2; C7]; 1xTMTpro [N-Term]	4.96276e-07	4.83621e-05	1	1	1	1	Q8BNW9 [295-313]	Q8BNW9 2xCarbamidomethyl [C296; C301]	1	2295.22	1.092	0.162873	0.52471	550.8	504.3	5.82	4.2	556.4	546.7	490.7	554.9	503.6	533.7	481.9	504.9		High	High	High	High	High	High	High	High	High	n/a	2.13e-05		4.919e-08		26		100
Q9D394	Protein RUFY3 OS=Mus musculus OX=10090 GN=Rufy3 PE=1 SV=1	[R].TLDSDYAPLQQFFVVMEHCLK.[H]	1xCarbamidomethyl [C19]; 1xTMTpro [K21]; 1xTMTpro [N-Term]	2.18794e-10	4.83621e-05	1	1	1	2	Q9D394 [93-113]	Q9D394 1xCarbamidomethyl [C111]	0	3149.63	0.914	0.538002	0.822871	1801.8	1971.5	12.53	2.19	1842.6	1742	2250.1	1761.8	1916.1	2018.8	1958.9	1984.1		High	High	High	High	High	High	High	High	High	n/a	2.13e-05		2.016e-12		93		100
Q9CZ13	Cytochrome b-c1 complex subunit 1, mitochondrial OS=Mus musculus OX=10090 GN=Uqcrc1 PE=1 SV=2	[R].LCTSATESEVTR.[G]	1xCarbamidomethyl [C2]; 1xTMTpro [N-Term]	1.64902e-08	4.83621e-05	1	1	1	8	Q9CZ13 [379-390]	Q9CZ13 1xCarbamidomethyl [C380]	0	1657.84	0.946	0.368338	0.7205	3740.1	3952.3	7.81	12.05	3287.9	3627.7	3855.9	3924	4467.8	4241.6	3441.8	3682.7		High	High	High	High	High	High	High	High	High	n/a	2.13e-05		5.753e-10		73		100
O88441	Metaxin-2 OS=Mus musculus OX=10090 GN=Mtx2 PE=1 SV=1	[K].TLDQVLEDVDQCCQALSQR.[L]	2xCarbamidomethyl [C12; C13]; 1xTMTpro [N-Term]	1.25154e-10	4.83621e-05	1	1	1	3	O88441 [178-196]	O88441 2xCarbamidomethyl [C189; C190]	0	2582.25	1.189	0.00561281	0.158869	1945.9	1636.5	5.38	3.83	1784.5	1944.1	1947.8	2033.2	1614.4	1753.2	1648.2	1624.8		High	High	High	High	High	High	High	High	High	n/a	2.13e-05		9.726e-13		92		100
F8VPN4	Glycogen debranching enzyme OS=Mus musculus OX=10090 GN=Agl PE=1 SV=1	[K].TLDPDDMVYCGVYDNALDNDNYNLAR.[G]	1xCarbamidomethyl [C10]; 1xTMTpro [N-Term]	2.098e-06	4.83621e-05	1	1	1	1	F8VPN4 [1416-1441]	F8VPN4 1xCarbamidomethyl [C1425]	0	3340.51	0.936	0.0581049	0.357543	202.7	216.4	3.38	5.96	203.7	201.7	193.5	210.1	238.4	212.1	220.9	209.2		High	High	High	High	High	High	High	High	n/a	High		0.0003185		4.985e-07		6.59	100
P10833	Ras-related protein R-Ras OS=Mus musculus OX=10090 GN=Rras PE=1 SV=1	[K].ICTVDGIPAR.[L]	1xCarbamidomethyl [C2]; 1xTMTpro [N-Term]	5.68925e-05	4.83621e-05	1	1	1	1	P10833 [69-78]	P10833 1xCarbamidomethyl [C70]	0	1405.78	1.042	0.715593	0.904009	228	218.8	4.72	7.96	226.8	230.7	208	229.3	214.1	242.1	200.4	223.6		High	High	High	High	High	High	High	High	High	n/a	2.13e-05		2.631e-05		34		100
Q3TKT4	Transcription activator BRG1 OS=Mus musculus OX=10090 GN=Smarca4 PE=1 SV=1	[R].LCTVNSVEEK.[I]	1xCarbamidomethyl [C2]; 1xTMTpro [K10]; 1xTMTpro [N-Term]	1.00642e-05	4.83621e-05	1	2	1	1	Q3TKT4 [1204-1213]	Q3TKT4 1xCarbamidomethyl [C1205]	0	1786.99	1.059	0.538074	0.822896	257.9	243.5	8.82	4.9	225.5	258.8	280.2	257	240.3	263	246.8	235.3		High	High	High	High	High	High	High	High	High	Low	2.13e-05	0.3447	2.536e-06	0.809	25	2.77	100
Q6P5U7	NACHT and WD repeat domain-containing protein 2 OS=Mus musculus OX=10090 GN=Nwd2 PE=1 SV=2	[K].ICTVTSEFSGGFVK.[F]	1xCarbamidomethyl [C2]; 1xTMTpro [K14]; 1xTMTpro [N-Term]	2.19154e-05	4.83621e-05	1	1	1	1	Q6P5U7 [1133-1146]	Q6P5U7 1xCarbamidomethyl [C1134]	0	2140.16	1.084	0.0106979	0.19281	660.2	609	3.04	2.56	626.5	673	661.6	658.8	610.6	626.2	588.3	607.4		High	High	High	High	High	High	High	High	High	n/a	2.13e-05		7.141e-06		28		100
Q8CHE4	PH domain leucine-rich repeat-containing protein phosphatase 1 OS=Mus musculus OX=10090 GN=Phlpp1 PE=1 SV=2	[K].LCVAALSVNNFR.[D]	1xCarbamidomethyl [C2]; 1xTMTpro [N-Term]	1.46302e-05	4.83621e-05	1	1	1	1	Q8CHE4 [1144-1155]	Q8CHE4 1xCarbamidomethyl [C1145]	0	1667.92	0.99	0.807612	0.939143	803.4	811.7	7.25	2.81	795.9	897.2	757.2	811	812.6	826.6	773.6	810.9		High	High	High	High	High	High	High	High	High	n/a	2.13e-05		4.178e-06		28		100
F8VPU2	FERM, ARHGEF and pleckstrin domain-containing protein 1 OS=Mus musculus OX=10090 GN=Farp1 PE=1 SV=1	[K].ICVEHHAFFR.[L]	1xCarbamidomethyl [C2]; 1xTMTpro [N-Term]	5.18365e-05	4.83621e-05	1	1	1	5	F8VPU2 [308-317]	F8VPU2 1xCarbamidomethyl [C309]	0	1619.84	1.143	0.0877339	0.417115	1706.5	1492.7	7.7	2.82	1713	1762.2	1474.6	1700.1	1470.8	1564.3	1507.5	1478.1		High	High	High	High	High	High	High	High	High	n/a	2.13e-05		2.31e-05		38		100
Q6P5E4	UDP-glucose:glycoprotein glucosyltransferase 1 OS=Mus musculus OX=10090 GN=Uggt1 PE=1 SV=4	[K].TIDLCNNPMTK.[E]	1xCarbamidomethyl [C5]; 1xTMTpro [K11]; 1xTMTpro [N-Term]	3.88066e-07	4.83621e-05	1	1	1	2	Q6P5E4 [1489-1499]	Q6P5E4 1xCarbamidomethyl [C1493]	0	1915.03	0.951	0.135159	0.49088	1823.4	1917.1	4.96	3.66	1798.9	1736.7	1952.1	1848.2	1867.5	1920.3	2034.1	1914		High	High	High	High	High	High	High	High	High	n/a	2.13e-05		3.552e-08		71		100
Q9CR16	Peptidyl-prolyl cis-trans isomerase D OS=Mus musculus OX=10090 GN=Ppid PE=1 SV=3	[K].LCVIAECGELK.[E]	2xCarbamidomethyl [C2; C7]; 1xTMTpro [K11]; 1xTMTpro [N-Term]	7.59382e-07	4.83621e-05	1	1	1	1	Q9CR16 [175-185]	Q9CR16 2xCarbamidomethyl [C176; C181]	0	1900.05	0.743	0.0489549	0.333389	510.9	687.6	13.28	13.28	601.3	504.6	434.8	517.2	527.5	666.8	712.7	709		High	High	High	High	High	High	High	High	High	n/a	2.13e-05		8.563e-08		22		100
Q64520	Guanylate kinase OS=Mus musculus OX=10090 GN=Guk1 PE=1 SV=2	[R].ICVLDVDLQGVR.[S]	1xCarbamidomethyl [C2]; 1xTMTpro [N-Term]	5.48309e-07	4.83621e-05	1	1	1	6	Q64520 [97-108]	Q64520 1xCarbamidomethyl [C98]	0	1690.95	1.025	0.836839	0.949522	3191.9	3112.8	6.6	7.1	2860.5	3325.5	3267	3118.4	3491	3183.1	2986.9	3044		High	High	High	High	High	High	High	High	High	n/a	2.13e-05		5.597e-08		26		100
P28652	Calcium/calmodulin-dependent protein kinase type II subunit beta OS=Mus musculus OX=10090 GN=Camk2b PE=1 SV=2	[K].LCTGHEYAAK.[I]	1xCarbamidomethyl [C2]; 1xTMTpro [K10]; 1xTMTpro [N-Term]	1.03775e-06	4.83621e-05	1	1	1	3	P28652 [34-43]	P28652 1xCarbamidomethyl [C35]	0	1757.95	1.144	0.0211481	0.249493	2624.4	2294.7	6.38	7.05	2755.5	2457	2499.5	2776.4	2032.1	2407	2291.2	2298.2		High	High	High	High	High	High	High	High	High	n/a	2.13e-05		1.293e-07		40		100
Q69ZK0	Phosphatidylinositol 3,4,5-trisphosphate-dependent Rac exchanger 1 protein OS=Mus musculus OX=10090 GN=Prex1 PE=1 SV=2	[R].LCVLNEILGTER.[D]	1xCarbamidomethyl [C2]; 1xTMTpro [N-Term]	1.53157e-05	4.83621e-05	1	1	1	2	Q69ZK0 [46-57]	Q69ZK0 1xCarbamidomethyl [C47]	0	1720.96	1.011	0.794122	0.934378	1063.5	1051.5	7.72	8.12	974.5	1142.2	1010	1119.8	1006.5	1201.8	1075.5	1027.9		High	High	High	High	High	High	High	High	High	n/a	2.13e-05		4.416e-06		35		100
O70325	Phospholipid hydroperoxide glutathione peroxidase OS=Mus musculus OX=10090 GN=Gpx4 PE=1 SV=4	[K].ICVNGDDAHPLWK.[W]	1xCarbamidomethyl [C2]; 1xTMTpro [K13]; 1xTMTpro [N-Term]	6.64867e-07	4.83621e-05	1	1	1	1	O70325 [133-145]	O70325 1xCarbamidomethyl [C134]	0	2133.14	1.153	0.202981	0.575051	1353.2	1174	14.9	6	1534.6	1352.1	1057.7	1354.4	1208.1	1065.4	1141	1213.6		High	High	High	High	High	High	High	High	High	n/a	2.13e-05		7.171e-08		38		100
Q80SW1; Q68FL4	S-adenosylhomocysteine hydrolase-like protein 1 OS=Mus musculus OX=10090 GN=Ahcyl1 PE=1 SV=1 Putative adenosylhomocysteinase 3 OS=Mus musculus OX=10090 GN=Ahcyl2 PE=1 SV=1	[K].LCVPAMNVNDSVTK.[Q]	1xCarbamidomethyl [C2]; 1xTMTpro [K14]; 1xTMTpro [N-Term]	1.34183e-08	4.83621e-05	2	2	1	8	Q80SW1 [271-284]; Q68FL4 [354-367]	Q80SW1 1xCarbamidomethyl [C272]; Q68FL4 1xCarbamidomethyl [C355]	0	2156.17	1.127	0.00832083	0.178515	9110.5	8086.4	4.31	4.55	9261.9	8652.9	9565.6	8961.6	8123.9	8497.2	7602.2	8049.1	Shared	High	High	High	High	High	High	High	High	High	n/a	2.13e-05		4.382e-10		38		100
P11881	Inositol 1,4,5-trisphosphate receptor type 1 OS=Mus musculus OX=10090 GN=Itpr1 PE=1 SV=2	[K].LCVQESASVR.[K]	1xCarbamidomethyl [C2]; 1xTMTpro [N-Term]	2.92328e-06	4.83621e-05	1	1	1	1	P11881 [1186-1195]	P11881 1xCarbamidomethyl [C1187]	0	1452.78	1.023	0.822094	0.9438	788.6	770.7	7.52	37.32	786.7	781.7	790.6	908.9	875.2	1366.9	678.6	645.6		High	High	High	High	High	High	High	High	High	n/a	2.13e-05		5.015e-07		40		100
P47753	F-actin-capping protein subunit alpha-1 OS=Mus musculus OX=10090 GN=Capza1 PE=1 SV=4	[K].TIDGQQTIIACIESHQFQPK.[N]	1xCarbamidomethyl [C11]; 1xTMTpro [K20]; 1xTMTpro [N-Term]	2.41323e-09	4.83621e-05	1	1	1	2	P47753 [147-166]	P47753 1xCarbamidomethyl [C157]	0	2922.56	0.87	0.322093	0.686016	1805.8	2076.6	15.39	6.52	1777.6	1687.2	2341.7	1834.4	1913.9	2232.9	2032.1	2122.1		High	High	High	High	High	High	High	High	High	n/a	2.13e-05		4.634e-11		58		100
E9Q3L2	Phosphatidylinositol 4-kinase alpha OS=Mus musculus OX=10090 GN=Pi4ka PE=1 SV=2	[K].ICWQAAIFK.[V]	1xCarbamidomethyl [C2]; 1xTMTpro [K9]; 1xTMTpro [N-Term]	2.29328e-05	4.83621e-05	1	1	1	3	E9Q3L2 [1845-1853]	E9Q3L2 1xCarbamidomethyl [C1846]	0	1745.01	0.979	0.146966	0.506542	1672.9	1708.2	5.09	2.14	1670.2	1675.7	1513	1690.8	1693.7	1702.2	1774.9	1714.1		High	High	High	High	High	High	High	High	High	n/a	2.13e-05		7.551e-06		25		100
Q8K3G9	DCC-interacting protein 13-beta OS=Mus musculus OX=10090 GN=Appl2 PE=1 SV=1	[K].ICYAINLGK.[E]	1xCarbamidomethyl [C2]; 1xTMTpro [K9]; 1xTMTpro [N-Term]	2.5107e-05	4.83621e-05	1	1	1	2	Q8K3G9 [603-611]	Q8K3G9 1xCarbamidomethyl [C604]	0	1659.97	0.865	0.104247	0.441278	2241.1	2592.3	5.3	12.12	2309.7	2174.5	2367.9	2110.6	2738.4	2933.1	2220.4	2454		High	High	High	High	High	High	High	High	High	Low	2.13e-05	0.6144	8.596e-06	0.9766	45	1.65	100
Q3UHJ0	AP2-associated protein kinase 1 OS=Mus musculus OX=10090 GN=Aak1 PE=1 SV=2	[K].LCYFTLPFGESQVAICDGSFTIPDNSR.[Y]	2xCarbamidomethyl [C2; C16]; 1xTMTpro [N-Term]	2.93161e-10	4.83621e-05	1	1	1	1	Q3UHJ0 [255-281]	Q3UHJ0 2xCarbamidomethyl [C256; C270]	0	3398.64	1.106	0.0393363	0.309199	469.6	424.5	5.03	4.24	435.8	461.6	490	477.8	416.2	449.9	409.4	433		High	High	High	High	High	High	High	High	High	n/a	2.13e-05		2.966e-12		77		100
Q8K1M6	Dynamin-1-like protein OS=Mus musculus OX=10090 GN=Dnm1l PE=1 SV=2	[R].ICYIFHETFGR.[T]	1xCarbamidomethyl [C2]; 1xTMTpro [N-Term]	8.42464e-06	4.83621e-05	1	1	1	6	Q8K1M6 [372-382]	Q8K1M6 1xCarbamidomethyl [C373]	0	1746.9	0.952	0.281809	0.650729	8593.5	9022.5	4.06	3	8315.7	8560.3	9152.2	8626.8	8534.6	8970.9	9122	9074.4		High	High	High	High	High	High	High	High	High	High	2.13e-05	0.0003185	2.009e-06	0.01228	46	1.85	100
P48774	Glutathione S-transferase Mu 5 OS=Mus musculus OX=10090 GN=Gstm5 PE=1 SV=1	[R].LCYNSNHENLK.[P]	1xCarbamidomethyl [C2]; 1xTMTpro [K11]; 1xTMTpro [N-Term]	2.71761e-06	4.83621e-05	1	1	1	2	P48774 [117-127]	P48774 1xCarbamidomethyl [C118]	0	2000.05	1.186	0.0924477	0.423457	1388.9	1171	15.68	3.81	1423.5	1165.8	1700	1355.2	1188.1	1154.1	1101	1199.7		High	High	High	High	High	High	High	High	High	n/a	2.13e-05		4.546e-07		30		100
P48774	Glutathione S-transferase Mu 5 OS=Mus musculus OX=10090 GN=Gstm5 PE=1 SV=1	[R].LCYNSNHENLKPQYLEQLPAQLK.[Q]	1xCarbamidomethyl [C2]; 2xTMTpro [K11; K23]; 1xTMTpro [N-Term]	3.44976e-08	4.83621e-05	1	1	1	3	P48774 [117-139]	P48774 1xCarbamidomethyl [C118]	1	3713.03	1.135	0.111431	0.453363	2405.7	2118.8	15.11	5.94	2585.4	2221.6	3032.2	2238.6	1985.3	2104.3	2133.4	2292.6		High	High	High	High	High	High	High	High	High	High	2.13e-05	0.0003185	1.506e-09	0.000481	26	6.28	100
P68134	Actin, alpha skeletal muscle OS=Mus musculus OX=10090 GN=Acta1 PE=1 SV=1	[K].LCYVALDFENEMATAASSSSLEK.[S]	1xCarbamidomethyl [C2]; 1xTMTpro [K23]; 1xTMTpro [N-Term]	4.17032e-10	4.83621e-05	1	4	1	5	P68134 [218-240]	P68134 1xCarbamidomethyl [C219]	0	3144.57	0.773	0.0219422	0.25166	3320.2	4297.2	12.39	2.83	3722.8	3330.7	2737.1	3309.7	4086.5	4341.3	4253.6	4342		High	High	High	High	High	High	High	High	High	n/a	2.13e-05		4.711e-12		88		100
Q8BIV3	Ran-binding protein 6 OS=Mus musculus OX=10090 GN=Ranbp6 PE=1 SV=3	[K].TIECISHVGLAVGK.[E]	1xCarbamidomethyl [C4]; 1xTMTpro [K14]; 1xTMTpro [N-Term]	9.60555e-08	4.83621e-05	1	1	1	1	Q8BIV3 [565-578]	Q8BIV3 1xCarbamidomethyl [C568]	0	2092.21	1.005	0.465752	0.781614	849.4	845	2.98	2.26	894.3	843.2	855.6	837.4	824.2	866.3	855.3	834.8		High	High	High	High	High	High	High	High	High	n/a	2.13e-05		5.718e-09		41		100
Q8BKC5	Importin-5 OS=Mus musculus OX=10090 GN=Ipo5 PE=1 SV=3	[K].TIECISLIGLAVGK.[E]	1xCarbamidomethyl [C4]; 1xTMTpro [K14]; 1xTMTpro [N-Term]	1.18257e-08	4.83621e-05	1	1	1	10	Q8BKC5 [557-570]	Q8BKC5 1xCarbamidomethyl [C560]	0	2082.25	0.923	0.580775	0.845103	3932.5	4261.1	4.97	10.29	3894.6	3761.5	4230	3970.9	3522.2	4115.5	4411.8	4430		High	High	High	High	High	High	High	High	High	n/a	2.13e-05		3.701e-10		48		100
Q7TQI7	Ankyrin repeat and BTB/POZ domain-containing protein 2 OS=Mus musculus OX=10090 GN=Abtb2 PE=1 SV=1	[R].TLEQSLLATCVGSISELSDLVSR.[A]	1xCarbamidomethyl [C10]; 1xTMTpro [N-Term]	9.72075e-11	4.83621e-05	1	1	1	1	Q7TQI7 [327-349]	Q7TQI7 1xCarbamidomethyl [C336]	0	2782.48	0.979	0.399847	0.740349	336.7	343.8	7.43	4.77	339.5	346.5	292.3	333.9	359	346.1	341.6	319.8		High	High	High	High	High	High	High	High	High	n/a	2.13e-05		6.994e-13		101		100
Q80T79	CUB and sushi domain-containing protein 3 OS=Mus musculus OX=10090 GN=Csmd3 PE=1 SV=3	[R].ICQQDHNWSGQLPSCVPVSCGHPGSPIYGR.[T]	3xCarbamidomethyl [C2; C15; C20]; 1xTMTpro [N-Term]	7.36477e-12	4.83621e-05	1	1	1	1	Q80T79 [2856-2885]	Q80T79 3xCarbamidomethyl [C2857; C2870; C2875]	0	3697.74	0.983	0.608346	0.857776	483	491.6	3.79	5.25	470.3	461	497	496	457.8	483.7	518.6	499.5		High	High	High	High	High	High	High	High	High	n/a	2.13e-05		2.406e-14		64		100
Q8BYA0	Tubulin-specific chaperone D OS=Mus musculus OX=10090 GN=Tbcd PE=1 SV=1	[R].ICQTVGVNTR.[G]	1xCarbamidomethyl [C2]; 1xTMTpro [N-Term]	3.99171e-06	4.83621e-05	1	1	1	1	Q8BYA0 [827-836]	Q8BYA0 1xCarbamidomethyl [C828]	0	1451.8	0.905	0.324864	0.687777	871.1	962.4	8.52	7.28	843.6	861	1012.1	881.3	1013.4	1010.7	874.6	916.4		High	High	High	High	High	High	High	High	High	n/a	2.13e-05		7.507e-07		52		100
Q8BM85	TBC domain-containing protein kinase-like protein OS=Mus musculus OX=10090 GN=Tbck PE=1 SV=1	[R].LCQYVDISR.[G]	1xCarbamidomethyl [C2]; 1xTMTpro [N-Term]	6.01388e-05	4.83621e-05	1	1	1	1	Q8BM85 [53-61]	Q8BM85 1xCarbamidomethyl [C54]	0	1457.77	0.915	0.382485	0.728608	345.1	377.1	12.99	9.51	300.2	359.4	407.1	331.4	403.1	410	352.8	338.5		High	High	High	High	High	High	High	High	High	n/a	2.13e-05		2.844e-05		25		100
Q68FD5	Clathrin heavy chain 1 OS=Mus musculus OX=10090 GN=Cltc PE=1 SV=3	[R].ICRESNCYDPER.[V]	2xCarbamidomethyl [C2; C7]; 1xTMTpro [N-Term]	2.49453e-05	4.83621e-05	1	1	1	2	Q68FD5 [747-758]	Q68FD5 2xCarbamidomethyl [C748; C753]	1	1902.88	1.223	0.0650926	0.371975	1182.1	966.5	12.78	7.61	1164.3	1200.2	921.6	1245.7	829.3	979.1	960.1	972.9		High	High	High	High	High	High	High	High	High	n/a	2.13e-05		8.485e-06		26		100
Q9D0F9	Phosphoglucomutase-1 OS=Mus musculus OX=10090 GN=Pgm1 PE=1 SV=4	[K].TIEEYAICPDLKVDLGVLGK.[Q]	1xCarbamidomethyl [C8]; 2xTMTpro [K12; K20]; 1xTMTpro [N-Term]	1.05163e-06	4.83621e-05	1	1	1	1	Q9D0F9 [153-172]	Q9D0F9 1xCarbamidomethyl [C160]	1	3145.8	1.025	0.282222	0.651081	376.5	367.2	3.8	3.83	379.7	373.3	393.6	359.1	372.7	346.1	361.9	377.6		High	High	High	High	High	High	High	High	High	n/a	2.13e-05		1.306e-07		19		100
O08599	Syntaxin-binding protein 1 OS=Mus musculus OX=10090 GN=Stxbp1 PE=1 SV=2	[K].LCRVEQDLAMGTDAEGEK.[I]	1xCarbamidomethyl [C2]; 1xTMTpro [K18]; 1xTMTpro [N-Term]	3.67534e-10	4.83621e-05	1	1	1	2	O08599 [365-382]	O08599 1xCarbamidomethyl [C366]	1	2630.34	0.787	0.374586	0.723975	4056.7	5154.8	23.91	21.37	4638.1	3374.1	5568.2	3548.1	3672	4580.8	5913.5	5800.8		High	High	High	High	High	High	High	High	High	n/a	2.13e-05		3.99e-12		48		100
P70698	CTP synthase 1 OS=Mus musculus OX=10090 GN=Ctps1 PE=1 SV=2	[K].LCSAHGVLVPGGFGVR.[G]	1xCarbamidomethyl [C2]; 1xTMTpro [N-Term]	2.86871e-09	4.83621e-05	1	1	1	3	P70698 [361-376]	P70698 1xCarbamidomethyl [C362]	0	1930.07	0.958	0.149004	0.509532	1126	1175.5	0.6	3.47	1117	1130.9	1130.2	1121.9	1171.6	1179.4	1199.5	1106.3		High	High	High	High	High	High	High	High	High	Low	2.13e-05	0.9686	5.835e-11	1	57	2.26	100
Q3UHK1	Proton myo-inositol cotransporter OS=Mus musculus OX=10090 GN=Slc2a13 PE=1 SV=2	[R].LCSCGAADSDEGR.[Y]	2xCarbamidomethyl [C2; C4]; 1xTMTpro [N-Term]	1.71914e-09	4.83621e-05	1	1	1	1	Q3UHK1 [602-614]	Q3UHK1 2xCarbamidomethyl [C603; C605]	0	1701.75	0.968	0.68452	0.892107	396.2	409.1	11.03	9.01	389.3	458.3	351.6	403.2	455.1	374.7	430.7	388.6		High	High	High	High	High	High	High	High	High	n/a	2.13e-05		2.988e-11		89		100
Q9D0F9	Phosphoglucomutase-1 OS=Mus musculus OX=10090 GN=Pgm1 PE=1 SV=4	[K].TIEEYAICPDLK.[V]	1xCarbamidomethyl [C8]; 1xTMTpro [K12]; 1xTMTpro [N-Term]	1.01053e-06	4.83621e-05	1	1	1	6	Q9D0F9 [153-164]	Q9D0F9 1xCarbamidomethyl [C160]	0	2060.12	1.018	0.511589	0.807183	3754.1	3687.6	19.85	5.54	3994.9	3402.1	5153.7	3527.8	3541.3	3902.3	3499.9	3839.9		High	High	High	High	High	High	High	High	High	n/a	2.13e-05		1.238e-07		45		100
O08638	Myosin-11 OS=Mus musculus OX=10090 GN=Myh11 PE=1 SV=1	[K].LCSEQGNHPK.[F]	1xCarbamidomethyl [C2]; 1xTMTpro [K10]; 1xTMTpro [N-Term]	5.27115e-06	4.83621e-05	1	1	1	1	O08638 [553-562]	O08638 1xCarbamidomethyl [C554]	0	1777.95	1.192	0.0478879	0.330518	922.2	773.4	10.61	3.72	1020.6	884.4	796.4	961.7	759.5	787.5	740	804.6		High	High	High	High	High	High	High	High	High	n/a	2.13e-05		1.078e-06		25		100
Q00PI9	Heterogeneous nuclear ribonucleoprotein U-like protein 2 OS=Mus musculus OX=10090 GN=Hnrnpul2 PE=1 SV=2	[K].TIEECEVILMVGLPGSGK.[T]	1xCarbamidomethyl [C5]; 1xTMTpro [K18]; 1xTMTpro [N-Term]	1.27675e-10	4.83621e-05	1	1	1	12	Q00PI9 [446-463]	Q00PI9 1xCarbamidomethyl [C450]	0	2540.4	0.929	0.149434	0.510145	5544.7	5967	6.74	6.07	5397.4	5363.1	6187.8	5696	5798.7	6632.3	5940.5	5993.6		High	High	High	High	High	High	High	High	High	n/a	2.13e-05		9.954e-13		123		100
Q791V5	Mitochondrial carrier homolog 2 OS=Mus musculus OX=10090 GN=Mtch2 PE=1 SV=1	[R].LCSGVLGTVVHGK.[V]	1xCarbamidomethyl [C2]; 1xTMTpro [K13]; 1xTMTpro [N-Term]	9.40285e-11	4.83621e-05	1	1	1	11	Q791V5 [78-90]	Q791V5 1xCarbamidomethyl [C79]	0	1935.13	0.952	0.342494	0.702932	7575.9	7956.2	5.33	6.13	8150.6	7373	7259.8	7784.3	8497.3	8262	7661.7	7462.8		High	High	High	High	High	High	High	High	High	n/a	2.13e-05		6.695e-13		69		100
Q9QXK3	Coatomer subunit gamma-2 OS=Mus musculus OX=10090 GN=Copg2 PE=1 SV=1	[K].TLEEAVNNIITFLGMQPCER.[S]	1xCarbamidomethyl [C18]; 1xTMTpro [N-Term]	4.55192e-07	4.83621e-05	1	1	1	1	Q9QXK3 [793-812]	Q9QXK3 1xCarbamidomethyl [C810]	0	2639.35	1.045	0.690115	0.894603	211.4	202.3	5.65	9.41	192.9	212.2	210.7	221.1	193.4	185.6	228.7	211.6		High	High	High	High	High	High	High	High	High	Low	2.13e-05	0.9567	4.365e-08	1	41	1.56	100
P70303	CTP synthase 2 OS=Mus musculus OX=10090 GN=Ctps2 PE=1 SV=1	[K].ICSIALVGK.[Y]	1xCarbamidomethyl [C2]; 1xTMTpro [K9]; 1xTMTpro [N-Term]	2.52697e-05	4.83621e-05	1	1	1	2	P70303 [298-306]	P70303 1xCarbamidomethyl [C299]	0	1568.97	0.983	0.83058	0.947082	1795	1825.8	21.64	5.66	1591	1701.7	2524.6	1893.3	1880.3	1772.8	1769.4	1990.4		High	High	High	High	High	High	High	High	High	n/a	2.13e-05		8.663e-06		44		100
Q8K310	Matrin-3 OS=Mus musculus OX=10090 GN=Matr3 PE=1 SV=1	[K].LCSLFYTNEEVAK.[N]	1xCarbamidomethyl [C2]; 1xTMTpro [K13]; 1xTMTpro [N-Term]	1.54162e-05	4.83621e-05	1	1	1	1	Q8K310 [804-816]	Q8K310 1xCarbamidomethyl [C805]	0	2182.17	1.128	0.121999	0.468795	749	664.1	12.94	12.95	944.7	734.6	727.5	763.6	601.6	599.3	767	733		High	High	High	High	High	High	High	High	High	n/a	2.13e-05		4.455e-06		42		100
O55023	Inositol monophosphatase 1 OS=Mus musculus OX=10090 GN=Impa1 PE=1 SV=1	[K].LCSIPIHGIR.[S]	1xCarbamidomethyl [C2]; 1xTMTpro [N-Term]	3.41759e-05	4.83621e-05	1	1	1	4	O55023 [182-191]	O55023 1xCarbamidomethyl [C183]	0	1469.86	0.985	0.633469	0.868536	3265.6	3315.8	38.25	13.78	3151.8	3257.3	6278.5	3274	4206.5	3389	3152.9	3244.1		High	High	High	High	High	High	High	High	High	High	2.13e-05	0.003881	1.299e-05	0.1519	41	2	100
Q80TJ1	Calcium-dependent secretion activator 1 OS=Mus musculus OX=10090 GN=Cadps PE=1 SV=3	[K].LCSMEMGQEHQYHSK.[I]	1xCarbamidomethyl [C2]; 1xTMTpro [K15]; 1xTMTpro [N-Term]	3.62048e-09	4.83621e-05	1	1	1	2	Q80TJ1 [1153-1167]	Q80TJ1 1xCarbamidomethyl [C1154]	0	2473.19	0.859	0.00267343	0.131248	1075.6	1251.7	3.82	4.02	1149.5	1064.4	1087	1058.6	1185.4	1241.6	1261.9	1306.6		High	High	High	High	High	High	High	High	High	n/a	2.13e-05		7.919e-11		31		100
G3X9X1	Kelch repeat and BTB domain-containing protein 2 OS=Mus musculus OX=10090 GN=Kbtbd2 PE=1 SV=1	[K].LCSPPADLHK.[V]	1xCarbamidomethyl [C2]; 1xTMTpro [K10]; 1xTMTpro [N-Term]	8.23591e-05	4.83621e-05	1	1	1	2	G3X9X1 [298-307]	G3X9X1 1xCarbamidomethyl [C299]	0	1745.99	0.875	0.0035529	0.141758	1750.1	2000.7	3.23	4.5	1816.3	1760.5	1679.3	1739.8	2107.8	1904.7	1958.1	2044.2		High	High	High	High	High	High	High	High	n/a	High		0.0003185		4.823e-05		5.61	100
D3YXJ0	Diacylglycerol kinase eta OS=Mus musculus OX=10090 GN=Dgkh PE=1 SV=2	[R].LCSQAAEELITR.[I]	1xCarbamidomethyl [C2]; 1xTMTpro [N-Term]	5.71834e-08	4.83621e-05	1	1	1	1	D3YXJ0 [986-997]	D3YXJ0 1xCarbamidomethyl [C987]	0	1694.91	0.937	0.128556	0.480555	641.6	684.4	7.34	5.53	623.2	660.4	567.9	669.9	645.1	710	723	659.7		High	High	High	High	High	High	High	High	High	n/a	2.13e-05		2.903e-09		45		100
O08747	Netrin receptor UNC5C OS=Mus musculus OX=10090 GN=Unc5c PE=1 SV=1	[K].LCSSLDAPQTR.[G]	1xCarbamidomethyl [C2]; 1xTMTpro [N-Term]	8.8224e-06	4.83621e-05	1	1	1	1	O08747 [852-862]	O08747 1xCarbamidomethyl [C853]	0	1551.81	0.806	0.000310518	0.0730461	603.2	748.1	2.37	4.18	593.1	586.9	613.5	615.2	718.7	743.8	752.5	794.4		High	High	High	High	High	High	High	High	High	n/a	2.13e-05		2.14e-06		31		100
Q3U0M1	Trafficking protein particle complex subunit 9 OS=Mus musculus OX=10090 GN=Trappc9 PE=1 SV=2	[R].ICSVSQLSVR.[D]	1xCarbamidomethyl [C2]; 1xTMTpro [N-Term]	5.59444e-06	4.83621e-05	1	1	1	1	Q3U0M1 [38-47]	Q3U0M1 1xCarbamidomethyl [C39]	0	1452.82	1.08	0.158971	0.521207	639.2	591.7	13.06	6.21	588.8	639	789.3	639.5	576.8	624	541	607		High	High	High	High	High	High	High	High	High	n/a	2.13e-05		1.166e-06		30		100
P28352	DNA-(apurinic or apyrimidinic site) endonuclease OS=Mus musculus OX=10090 GN=Apex1 PE=1 SV=2	[K].ICSWNVDGLR.[A]	1xCarbamidomethyl [C2]; 1xTMTpro [N-Term]	7.14378e-06	4.83621e-05	1	1	1	1	P28352 [63-72]	P28352 1xCarbamidomethyl [C64]	0	1523.8	1.11	0.0237591	0.258109	848.8	764.6	7.04	8.11	831.9	831.6	961.8	866	773.2	756.1	651.3	779.5		High	High	High	High	High	High	High	High	High	n/a	2.13e-05		1.609e-06		48		100
O88487	Cytoplasmic dynein 1 intermediate chain 2 OS=Mus musculus OX=10090 GN=Dync1i2 PE=1 SV=1	[K].ICSWSLDMLSHPQDSMELVHK.[Q]	1xCarbamidomethyl [C2]; 1xTMTpro [K21]; 1xTMTpro [N-Term]	1.1867e-10	4.83621e-05	1	1	1	1	O88487 [381-401]	O88487 1xCarbamidomethyl [C382]	0	3121.58	0.986	0.924944	0.979804	802.8	814.4	9.66	4.94	809.4	749.1	935.1	796.3	855.5	779.1	783.7	846.3		High	High	High	High	High	High	High	High	High	n/a	2.13e-05		9.052e-13		43		100
P35802	Neuronal membrane glycoprotein M6-a OS=Mus musculus OX=10090 GN=Gpm6a PE=1 SV=1	[K].ICTASENFLR.[M]	1xCarbamidomethyl [C2]; 1xTMTpro [N-Term]	8.20538e-06	4.83621e-05	1	1	1	6	P35802 [191-200]	P35802 1xCarbamidomethyl [C192]	0	1514.8	1.022	0.341613	0.702673	4082.3	3995.5	1.42	5.04	3976.6	4085.7	4078.9	4105.5	3666.1	3984.6	4134.2	4006.4		High	High	High	High	High	High	High	High	High	High	2.13e-05	0.0007911	1.932e-06	0.04848	50	1.72	100
Q9CXT8	Mitochondrial-processing peptidase subunit beta OS=Mus musculus OX=10090 GN=Pmpcb PE=1 SV=1	[R].LCTDVTESEVAR.[A]	1xCarbamidomethyl [C2]; 1xTMTpro [N-Term]	3.51235e-07	4.83621e-05	1	1	1	1	Q9CXT8 [388-399]	Q9CXT8 1xCarbamidomethyl [C389]	0	1683.85	1.121	0.071585	0.383873	817.3	729	9.16	2.87	746	810	928.8	824.7	738.5	719.7	710.9	758.2		High	High	High	High	High	High	High	High	High	Low	2.13e-05	0.9637	3.12e-08	1	23	1.74	100
P60710	Actin, cytoplasmic 1 OS=Mus musculus OX=10090 GN=Actb PE=1 SV=1	[K].LCYVALDFEQEMATAASSSSLEK.[S]	1xCarbamidomethyl [C2]; 1xTMTpro [K23]; 1xTMTpro [N-Term]	5.34294e-11	4.83621e-05	1	2	1	326	P60710 [216-238]	P60710 1xCarbamidomethyl [C217]	0	3158.59	0.608	0.00230675	0.123013	124536	204740	14.33	8.81	150316	125638	106306	123444	178682	199638	220407	209971		High	High	High	High	High	High	High	High	High	High	2.13e-05	0.0003185	3.211e-13	0.0002195	85	3.52	100
P46460	Vesicle-fusing ATPase OS=Mus musculus OX=10090 GN=Nsf PE=1 SV=2	[R].THPSVVPGCIAFSLPQR.[K]	1xCarbamidomethyl [C9]; 1xTMTpro [N-Term]	1.55322e-08	4.83621e-05	1	1	1	8	P46460 [51-67]	P46460 1xCarbamidomethyl [C59]	0	2170.18	1.223	0.177332	0.543854	3821	3124.1	18.55	16.31	4859.7	4313.7	3384.6	3352.8	2866.2	2997.5	3256.2	4065.2		High	High	High	High	High	High	High	High	High	High	2.13e-05	0.00993	5.288e-10	0.2254	51	2.66	100
Q9CXI5	Mesencephalic astrocyte-derived neurotrophic factor OS=Mus musculus OX=10090 GN=Manf PE=1 SV=1	[R].LCYYIGATDDAATK.[I]	1xCarbamidomethyl [C2]; 1xTMTpro [K14]; 1xTMTpro [N-Term]	2.08115e-08	4.83621e-05	1	1	1	2	Q9CXI5 [71-84]	Q9CXI5 1xCarbamidomethyl [C72]	0	2170.13	0.867	0.00707221	0.16865	1783.2	2056.3	6.24	6.22	1793.1	1581.1	1773.4	1819.1	1975.1	1977	2239	2138.8		High	High	High	High	High	High	High	High	High	n/a	2.13e-05		7.77e-10		42		100
Q8BGT8	Phytanoyl-CoA hydroxylase-interacting protein-like OS=Mus musculus OX=10090 GN=Phyhipl PE=1 SV=1	[R].LDHALSSPSSPCEEIK.[N]	1xCarbamidomethyl [C12]; 1xTMTpro [K16]; 1xTMTpro [N-Term]	5.9511e-08	4.83621e-05	1	1	1	3	Q8BGT8 [6-21]	Q8BGT8 1xCarbamidomethyl [C17]	0	2378.25	0.937	0.489489	0.794917	1805.5	1927	7.63	5.45	1798.8	1812.1	2082.8	1784.8	1834.4	1849.2	2008.1	2037.3		High	High	High	High	High	High	High	High	High	n/a	2.13e-05		3.056e-09		59		100
Q9CY28	GTP-binding protein 8 OS=Mus musculus OX=10090 GN=Gtpbp8 PE=2 SV=1	[R].LDHAPSLQQPEVCFIGR.[S]	1xCarbamidomethyl [C13]; 1xTMTpro [N-Term]	3.39752e-07	4.83621e-05	1	1	1	2	Q9CY28 [103-119]	Q9CY28 1xCarbamidomethyl [C115]	0	2271.19	1.024	0.337189	0.699177	1119.6	1093.8	5.44	3.93	1121.1	1236.1	1099.9	1118.1	1163	1077.1	1110.8	1066.4		High	High	High	High	High	High	High	High	High	n/a	2.13e-05		2.977e-08		40		100
Q80UP3	Diacylglycerol kinase zeta OS=Mus musculus OX=10090 GN=Dgkz PE=1 SV=2	[R].TICHYIVEAGASLMK.[T]	1xCarbamidomethyl [C3]; 1xTMTpro [K15]; 1xTMTpro [N-Term]	1.59217e-07	4.83621e-05	1	1	1	1	Q80UP3 [873-887]	Q80UP3 1xCarbamidomethyl [C875]	0	2301.26	0.927	0.747305	0.916079	860.3	927.8	2.2	14.82	869.9	850.9	834.6	876.1	700.3	935.7	1004.9	920		High	High	High	High	High	High	High	High	High	n/a	2.13e-05		1.109e-08		71		100
Q8VCH5	Rab9 effector protein with kelch motifs OS=Mus musculus OX=10090 GN=Rabepk PE=1 SV=2	[R].LDHSMCVIPWPVMSTSENK.[D]	1xCarbamidomethyl [C6]; 1xTMTpro [K19]; 1xTMTpro [N-Term]	3.63824e-08	4.83621e-05	1	1	1	1	Q8VCH5 [302-320]	Q8VCH5 1xCarbamidomethyl [C307]	0	2839.44	0.92	0.35326	0.709611	924.8	1005.6	7.75	5.79	942.1	907.9	1060	900.5	930.3	971.4	1041.1	1051.9		High	High	High	High	High	High	High	High	High	n/a	2.13e-05		1.615e-09		47		100
Q8CGK3	Lon protease homolog, mitochondrial OS=Mus musculus OX=10090 GN=Lonp1 PE=1 SV=2	[R].TLCGLDESK.[A]	1xCarbamidomethyl [C3]; 1xTMTpro [K9]; 1xTMTpro [N-Term]	2.22015e-05	4.83621e-05	1	1	1	4	Q8CGK3 [669-677]	Q8CGK3 1xCarbamidomethyl [C671]	0	1630.9	0.945	0.366379	0.718998	1763.1	1865.5	6.19	6.26	1900.7	1658.3	1820.7	1707.4	1706.8	1807.3	1960.5	1925.6		High	High	High	High	High	High	High	High	High	n/a	2.13e-05		7.233e-06		49		100
Q8BTZ5	Ankyrin repeat domain-containing protein 46 OS=Mus musculus OX=10090 GN=Ankrd46 PE=1 SV=1	[K].IDICNHQGATPLVLAK.[R]	1xCarbamidomethyl [C4]; 1xTMTpro [K16]; 1xTMTpro [N-Term]	2.36143e-08	4.83621e-05	1	1	1	1	Q8BTZ5 [101-116]	Q8BTZ5 1xCarbamidomethyl [C104]	0	2358.35	0.876	0.0847801	0.411929	1368.6	1563.1	11.74	9.76	1506.6	1411.3	1135.2	1327.1	1416.1	1497.6	1766.9	1631.5		High	High	High	High	High	High	High	High	High	n/a	2.13e-05		9.193e-10		58		100
Q6DFY8	BMP/retinoic acid-inducible neural-specific protein 2 OS=Mus musculus OX=10090 GN=Brinp2 PE=1 SV=1	[R].LDLFSCLLR.[H]	1xCarbamidomethyl [C6]; 1xTMTpro [N-Term]	4.48861e-05	4.83621e-05	1	2	1	1	Q6DFY8 [738-746]	Q6DFY8 1xCarbamidomethyl [C743]	0	1440.82	0.932	0.289948	0.658691	1155.8	1239.5	7.34	14.06	1179.6	1132.4	1009.1	1188.8	1058.1	1150.4	1445.4	1335.6		High	High	High	High	High	High	High	High	High	n/a	2.13e-05		1.895e-05		30		100
Q8K411	Presequence protease, mitochondrial OS=Mus musculus OX=10090 GN=Pitrm1 PE=1 SV=1	[K].LDIGLAAGDIPVQYCPQPTNGMVYFR.[A]	1xCarbamidomethyl [C15]; 1xTMTpro [N-Term]	1.09759e-11	4.83621e-05	1	1	1	3	Q8K411 [574-599]	Q8K411 1xCarbamidomethyl [C588]	0	3199.62	1.074	0.0819567	0.407312	957.7	891.9	5.28	2.32	978.5	994.2	882.2	937.3	898.5	857.2	885.4	903		High	High	High	High	High	High	High	High	High	High	2.13e-05	0.0003185	4.033e-14	0.007881	83	3.48	100
P26638	Serine--tRNA ligase, cytoplasmic OS=Mus musculus OX=10090 GN=Sars1 PE=1 SV=3	[R].TICAILENYQAEK.[G]	1xCarbamidomethyl [C3]; 1xTMTpro [K13]; 1xTMTpro [N-Term]	3.29864e-09	4.83621e-05	1	1	1	6	P26638 [436-448]	P26638 1xCarbamidomethyl [C438]	0	2161.18	0.853	0.499336	0.80066	3970.7	4656.5	22.55	12.07	4407.8	3530.2	5590.1	3577	3964.5	4948.8	4381.4	5203.7		High	High	High	High	High	High	High	High	High	n/a	2.13e-05		6.997e-11		98		100
Q5SVR0	TBC1 domain family member 9B OS=Mus musculus OX=10090 GN=Tbc1d9b PE=1 SV=1	[R].LDGHTGCTLWTPFNK.[L]	1xCarbamidomethyl [C7]; 1xTMTpro [K15]; 1xTMTpro [N-Term]	4.38282e-08	4.83621e-05	1	1	1	1	Q5SVR0 [302-316]	Q5SVR0 1xCarbamidomethyl [C308]	0	2355.24	0.845	0.0291307	0.276908	1064.2	1259.2	8.45	1.67	1210.3	1078.6	994.7	1050.1	1254.4	1248.4	1295.8	1263.9		High	High	High	High	High	High	High	High	High	n/a	2.13e-05		2.053e-09		38		100
P35288	Ras-related protein Rab-23 OS=Mus musculus OX=10090 GN=Rab23 PE=1 SV=2	[K].IDLLDDSCIK.[N]	1xCarbamidomethyl [C8]; 1xTMTpro [K10]; 1xTMTpro [N-Term]	5.37679e-06	4.83621e-05	1	1	1	2	P35288 [123-132]	P35288 1xCarbamidomethyl [C130]	0	1800.01	1.017	0.951011	0.986526	1185.7	1166	9.29	8.21	1263.4	1048.3	1263.8	1112.8	1076.1	1091.6	1245.5	1253		High	High	High	High	High	High	High	High	High	n/a	2.13e-05		1.11e-06		51		100
Q6P4T2	U5 small nuclear ribonucleoprotein 200 kDa helicase OS=Mus musculus OX=10090 GN=Snrnp200 PE=1 SV=1	[K].TICAEFAILR.[M]	1xCarbamidomethyl [C3]; 1xTMTpro [N-Term]	4.51692e-05	4.83621e-05	1	1	1	2	Q6P4T2 [1357-1366]	Q6P4T2 1xCarbamidomethyl [C1359]	0	1497.84	1.101	0.271971	0.641119	1651	1499.5	9.14	7.79	1428.3	1679.9	1782.4	1622.7	1536	1661.1	1383.6	1463.9		High	High	High	High	High	High	High	High	High	n/a	2.13e-05		1.904e-05		32		100
Q6PDJ1	VWFA and cache domain-containing protein 1 OS=Mus musculus OX=10090 GN=Cachd1 PE=2 SV=1	[R].LDLLGQPSACLHFK.[Q]	1xCarbamidomethyl [C10]; 1xTMTpro [K14]; 1xTMTpro [N-Term]	6.23954e-05	4.83621e-05	1	1	1	1	Q6PDJ1 [646-659]	Q6PDJ1 1xCarbamidomethyl [C655]	0	2207.25	1.158	0.0246049	0.261237	1084.2	936.2	5.92	6.1	1013.5	1073.6	1169.4	1094.9	1047.3	941.5	930.8	921.5		High	High	High	High	High	High	High	High	High	n/a	2.13e-05		2.985e-05		21		100
Q5KU39	Vacuolar protein sorting-associated protein 41 homolog OS=Mus musculus OX=10090 GN=Vps41 PE=1 SV=1	[R].LDIIQPLPETCEEISSDALTVR.[G]	1xCarbamidomethyl [C11]; 1xTMTpro [N-Term]	2.43666e-07	4.83621e-05	1	1	1	1	Q5KU39 [303-324]	Q5KU39 1xCarbamidomethyl [C313]	0	2803.47	1.017	0.965521	0.990213	330.8	325.3	6.24	1.92	324.9	336.8	296.9	342.5	329.3	318.9	331.9	321.3		High	High	High	High	High	High	High	High	High	n/a	2.13e-05		1.929e-08		49		100
Q6P5F9	Exportin-1 OS=Mus musculus OX=10090 GN=Xpo1 PE=1 SV=1	[K].LDINLLDNVVNCLYHGEGAQQR.[M]	1xCarbamidomethyl [C12]; 1xTMTpro [N-Term]	2.87871e-11	4.83621e-05	1	1	1	2	Q6P5F9 [23-44]	Q6P5F9 1xCarbamidomethyl [C34]	0	2845.46	0.909	0.0323243	0.288215	906.7	997.3	4.35	6.5	903.2	966.5	870.9	910.2	968.4	1117.4	999.8	994.8		High	High	High	High	High	High	High	High	High	n/a	2.13e-05		1.43e-13		80		100
Q8BZ81	Leucine-rich repeat transmembrane neuronal protein 3 OS=Mus musculus OX=10090 GN=Lrrtm3 PE=2 SV=2	[R].LDLSGNEIEAFSGPSVFQCVPNLQR.[L]	1xCarbamidomethyl [C19]; 1xTMTpro [N-Term]	6.87898e-11	4.83621e-05	1	1	1	1	Q8BZ81 [258-282]	Q8BZ81 1xCarbamidomethyl [C276]	0	3081.56	0.966	0.344791	0.703987	419.2	433.9	4.01	5.31	399.4	420.4	418	440.5	421.8	409.3	460.1	446.5		High	High	High	High	High	High	High	High	High	n/a	2.13e-05		4.45e-13		74		100
A2ASQ1	Agrin OS=Mus musculus OX=10090 GN=Agrn PE=1 SV=1	[R].LDISIQSLGPCR.[E]	1xCarbamidomethyl [C11]; 1xTMTpro [N-Term]	1.96327e-06	4.83621e-05	1	1	1	2	A2ASQ1 [854-865]	A2ASQ1 1xCarbamidomethyl [C864]	0	1662.92	1.093	0.156091	0.518222	1324.4	1212.2	4.69	7.35	1264.2	1365.8	1284.2	1393	1364.8	1189.5	1158.4	1235.3		High	High	High	High	High	High	High	High	High	n/a	2.13e-05		2.975e-07		51		100
Q9CRC8	Leucine-rich repeat-containing protein 40 OS=Mus musculus OX=10090 GN=Lrrc40 PE=1 SV=2	[R].LDLSNNDISSLPCSLGNLHLK.[F]	1xCarbamidomethyl [C13]; 1xTMTpro [K21]; 1xTMTpro [N-Term]	6.00141e-09	4.83621e-05	1	1	1	1	Q9CRC8 [317-337]	Q9CRC8 1xCarbamidomethyl [C329]	0	2918.59	0.908	0.191744	0.562432	623.6	686.4	5.71	7.57	652.9	610.4	637.1	572.3	590.6	680.5	698.1	692.4		High	High	High	High	High	High	High	High	High	n/a	2.13e-05		1.533e-10		76		100
E9Q7G0	Nuclear mitotic apparatus protein 1 OS=Mus musculus OX=10090 GN=Numa1 PE=1 SV=1	[R].LDFVCSFLQK.[N]	1xCarbamidomethyl [C5]; 1xTMTpro [K10]; 1xTMTpro [N-Term]	5.75998e-05	4.83621e-05	1	1	1	1	E9Q7G0 [61-70]	E9Q7G0 1xCarbamidomethyl [C65]	0	1865.05	0.842	0.576011	0.843271	633.4	752.1	27.57	5.41	636.3	588.6	1011.4	630.5	774.2	806.7	717.3	730.7		High	High	High	High	High	High	High	High	High	n/a	2.13e-05		2.672e-05		56		100
Q6DFW0	Guanine nucleotide exchange factor C9orf72 homolog OS=Mus musculus OX=10090 GN=C9orf72 PE=1 SV=2	[R].TLCLFLTPAER.[K]	1xCarbamidomethyl [C3]; 1xTMTpro [N-Term]	4.29499e-05	4.83621e-05	1	1	1	4	Q6DFW0 [250-260]	Q6DFW0 1xCarbamidomethyl [C252]	0	1624.91	1.005	0.508966	0.805443	3676.5	3656.7	5.02	2.29	3686.9	3747.8	3344.7	3666.2	3805	3611.6	3656.5	3656.9		High	High	High	High	High	High	High	High	High	n/a	2.13e-05		1.782e-05		62		100
Q8CIE6	Coatomer subunit alpha OS=Mus musculus OX=10090 GN=Copa PE=1 SV=2	[K].LDALCNIHENIR.[V]	1xCarbamidomethyl [C5]; 1xTMTpro [N-Term]	1.67411e-06	4.83621e-05	1	1	1	1	Q8CIE6 [518-529]	Q8CIE6 1xCarbamidomethyl [C522]	0	1771.94	1.004	0.649341	0.87748	518.8	517	3.13	1.91	520.5	517.1	503.1	542.4	525	505.4	523.9	510.1		High	High	High	High	High	High	High	High	High	n/a	2.13e-05		2.412e-07		53		100
P70236	Dual specificity mitogen-activated protein kinase kinase 6 OS=Mus musculus OX=10090 GN=Map2k6 PE=1 SV=1	[K].TIDAGCKPYMAPER.[I]	1xCarbamidomethyl [C6]; 1xTMTpro [K7]; 1xTMTpro [N-Term]	1.77089e-07	4.83621e-05	1	1	1	1	P70236 [211-224]	P70236 1xCarbamidomethyl [C216]	1	2217.17	0.826	0.0608554	0.362893	1767.3	2138.6	12.01	2.64	2105.9	1809.7	1593.4	1725.8	2056.2	2160	2184.5	2117.3		High	High	High	High	High	High	High	High	High	n/a	2.13e-05		1.271e-08		26		100
P20918	Plasminogen OS=Mus musculus OX=10090 GN=Plg PE=1 SV=3	[R].TICYITGWGETQGTFGAGR.[L]	1xCarbamidomethyl [C3]; 1xTMTpro [N-Term]	2.62653e-08	4.83621e-05	1	1	1	1	P20918 [699-717]	P20918 1xCarbamidomethyl [C701]	0	2379.17	1.034	0.402686	0.742842	670.5	648.2	8.4	1.66	685.6	747.5	612.4	655.7	656.9	632.9	652.9	643.5		High	High	High	High	High	High	High	High	High	n/a	2.13e-05		1.053e-09		63		100
Q8R3Q6	Protein MIX23 OS=Mus musculus OX=10090 GN=Mix23 PE=1 SV=1	[K].IDASQTCK.[Q]	1xCarbamidomethyl [C7]; 1xTMTpro [K8]; 1xTMTpro [N-Term]	0.000114419	4.83621e-05	1	1	1	1	Q8R3Q6 [47-54]	Q8R3Q6 1xCarbamidomethyl [C53]	0	1530.84	0.941	0.844606	0.951416	733	779.3	10.57	13.96	718.2	636.6	823.6	748.1	600.5	750	809.8	832.6		High	High	High	High	High	High	High	High	High	n/a	2.13e-05		7.326e-05		36		100
Q9Z2I8	Succinate--CoA ligase [GDP-forming] subunit beta, mitochondrial OS=Mus musculus OX=10090 GN=Suclg2 PE=1 SV=3	[K].IDATQVEVNPFGETPEGQVVCFDAK.[I]	1xCarbamidomethyl [C21]; 1xTMTpro [K25]; 1xTMTpro [N-Term]	9.44915e-10	4.83621e-05	1	1	1	4	Q9Z2I8 [236-260]	Q9Z2I8 1xCarbamidomethyl [C256]	0	3358.71	1.038	0.315463	0.681016	1486.7	1431.8	12.53	4.8	1556.5	1393.8	1817.3	1419.9	1476.7	1353.1	1388.3	1495.3		High	High	High	High	High	High	High	High	High	n/a	2.13e-05		1.369e-11		89		100
Q04690	Neurofibromin OS=Mus musculus OX=10090 GN=Nf1 PE=1 SV=1	[K].IDAVYCHSVELR.[N]	1xCarbamidomethyl [C6]; 1xTMTpro [N-Term]	1.33574e-06	4.83621e-05	1	1	1	1	Q04690 [429-440]	Q04690 1xCarbamidomethyl [C434]	0	1765.92	0.972	0.476443	0.78706	235.1	241.9	3.26	5.76	237.1	233.1	224.6	242.8	253.2	225.6	251.8	232.4		High	High	High	High	High	High	High	High	High	n/a	2.13e-05		1.797e-07		70		100
Q61035	Histidine--tRNA ligase, cytoplasmic OS=Mus musculus OX=10090 GN=Hars1 PE=1 SV=2	[R].TICSSVDK.[L]	1xCarbamidomethyl [C3]; 1xTMTpro [K8]; 1xTMTpro [N-Term]	0.000114419	4.83621e-05	1	1	1	5	Q61035 [233-240]	Q61035 1xCarbamidomethyl [C235]	0	1517.85	1.029	0.526436	0.817955	4475.4	4347.3	17.74	11.71	4662.4	3708.8	5643.5	4295.9	3556.6	4522.6	4178.9	4672.2		High	High	High	High	High	High	High	High	High	n/a	2.13e-05		7.335e-05		22		100
Q99NE5	Regulating synaptic membrane exocytosis protein 1 OS=Mus musculus OX=10090 GN=Rims1 PE=1 SV=2	[R].TLCSMHHLAPGGSAPPSPLLTR.[T]	1xCarbamidomethyl [C3]; 1xTMTpro [N-Term]	3.95883e-07	4.83621e-05	1	1	1	1	Q99NE5 [996-1017]	Q99NE5 1xCarbamidomethyl [C998]	0	2604.37	0.979	0.454438	0.774827	419	427.9	9.35	9.86	414.4	423.7	358.7	450.2	410	393.4	490	446.7		High	High	High	High	High	High	High	High	High	n/a	2.13e-05		3.636e-08		25		100
P51410	60S ribosomal protein L9 OS=Mus musculus OX=10090 GN=Rpl9 PE=1 SV=2	[R].TICSHVQNMIK.[G]	1xCarbamidomethyl [C3]; 1xTMTpro [K11]; 1xTMTpro [N-Term]	7.21681e-08	4.83621e-05	1	1	1	4	P51410 [72-82]	P51410 1xCarbamidomethyl [C74]	0	1939.07	1.051	0.181272	0.548807	3287.2	3127.4	7	3.6	3338.1	2990.2	3541.9	3237	2907.5	3127.3	3131	3127.5		High	High	High	High	High	High	High	High	High	Medium	2.13e-05	0.02411	3.959e-09	0.3163	67	2.39	100
Q9Z1G3	V-type proton ATPase subunit C 1 OS=Mus musculus OX=10090 GN=Atp6v1c1 PE=1 SV=4	[K].IDCNLLEFK.[-]	1xCarbamidomethyl [C3]; 1xTMTpro [K9]; 1xTMTpro [N-Term]	1.14033e-05	4.83621e-05	1	1	1	3	Q9Z1G3 [374-382]	Q9Z1G3 1xCarbamidomethyl [C376]	0	1759.99	0.886	0.326409	0.689229	2582.9	2913.7	8.45	11.09	2876.5	2369.3	2671.6	2497.2	2377.6	2820.4	3067.2	3010.2		High	High	High	High	High	High	High	High	High	Medium	2.13e-05	0.01203	2.981e-06	0.2392	46	2.58	100
Q810U3	Neurofascin OS=Mus musculus OX=10090 GN=Nfasc PE=1 SV=1	[R].LDCPFFGSPIPTLR.[W]	1xCarbamidomethyl [C3]; 1xTMTpro [N-Term]	5.00624e-08	4.83621e-05	1	1	1	2	Q810U3 [450-463]	Q810U3 1xCarbamidomethyl [C452]	0	1924.03	1.16	0.0188255	0.23884	1129	973.5	4.12	7.14	1205.6	1113.9	1099.6	1144.2	1088.1	932.1	946	1001.9		High	High	High	High	High	High	High	High	High	n/a	2.13e-05		2.448e-09		58		100
Q9Z103	Activity-dependent neuroprotector homeobox protein OS=Mus musculus OX=10090 GN=Adnp PE=1 SV=2	[K].TLCPLCFSILK.[G]	2xCarbamidomethyl [C3; C6]; 1xTMTpro [K11]; 1xTMTpro [N-Term]	0.000114419	4.83621e-05	1	1	1	1	Q9Z103 [621-631]	Q9Z103 2xCarbamidomethyl [C623; C626]	0	1960.13	1.138	0.123642	0.471028	412.9	362.9	10.33	9.02	355.7	387.2	440.2	441	390.8	370.3	314.6	355.6		High	High	High	High	High	High	High	High	High	n/a	2.13e-05		7.302e-05		43		100
B2RQC6	CAD protein OS=Mus musculus OX=10090 GN=Cad PE=1 SV=1	[R].IDCWFLHR.[M]	1xCarbamidomethyl [C3]; 1xTMTpro [N-Term]	7.04774e-05	4.83621e-05	1	1	1	1	B2RQC6 [832-839]	B2RQC6 1xCarbamidomethyl [C834]	0	1450.76	0.976	0.420735	0.755523	196.5	201.3	3.33	7.35	198.2	194.9	184.5	198	219.6	201	201.6	183.3		High	High	High	High	High	High	High	High	High	Low	2.13e-05	0.9309	3.55e-05	1	57	1.1	100
Q91VI7	Ribonuclease inhibitor OS=Mus musculus OX=10090 GN=Rnh1 PE=1 SV=1	[R].LDDCGLTEVR.[C]	1xCarbamidomethyl [C4]; 1xTMTpro [N-Term]	6.51294e-06	4.83621e-05	1	1	1	1	Q91VI7 [30-39]	Q91VI7 1xCarbamidomethyl [C33]	0	1481.76	0.989	0.502129	0.802008	1117.8	1130	8.19	15.5	1136.7	1099.2	1270	1053	838.9	1191.6	1071.6	1191.9		High	High	High	High	High	High	High	High	High	n/a	2.13e-05		1.426e-06		48		100
Q6DFV3	Rho GTPase-activating protein 21 OS=Mus musculus OX=10090 GN=Arhgap21 PE=1 SV=1	[R].LDDCPPAHTNR.[Y]	1xCarbamidomethyl [C4]; 1xTMTpro [N-Term]	1.46302e-05	4.83621e-05	1	1	1	2	Q6DFV3 [1142-1152]	Q6DFV3 1xCarbamidomethyl [C1145]	0	1599.79	0.964	0.367353	0.719623	572.3	593.9	7.51	7.21	565.6	579	493.2	581.5	525.6	599.9	624.6	588		High	High	High	High	High	High	High	High	High	Low	2.13e-05	0.9579	4.169e-06	1	56	1.25	100
Q8BYI8	Protein FAM234B OS=Mus musculus OX=10090 GN=Fam234b PE=1 SV=1	[K].TICLVTGTR.[K]	1xCarbamidomethyl [C3]; 1xTMTpro [N-Term]	3.35273e-05	4.83621e-05	1	1	1	1	Q8BYI8 [224-232]	Q8BYI8 1xCarbamidomethyl [C226]	0	1324.76	1.098	0.556416	0.83359	754	686.7	9.97	13.91	720.1	789.5	651.7	817.3	844.3	615.7	711.5	662.8		High	High	High	High	High	High	High	High	High	n/a	2.13e-05		1.27e-05		37		100
D3YZU1	SH3 and multiple ankyrin repeat domains protein 1 OS=Mus musculus OX=10090 GN=Shank1 PE=1 SV=1	[R].TLCLGGAHIDFR.[A]	1xCarbamidomethyl [C3]; 1xTMTpro [N-Term]	1.34834e-07	4.83621e-05	1	1	1	6	D3YZU1 [232-243]	D3YZU1 1xCarbamidomethyl [C234]	0	1663.89	0.998	0.458815	0.778352	3522.2	3530.6	10.72	7.41	3271.1	3804.5	3065.9	3792.5	3516.8	4066.8	3513.4	3544.4		High	High	High	High	High	High	High	High	High	n/a	2.13e-05		8.947e-09		76		100
P16330	2',3'-cyclic-nucleotide 3'-phosphodiesterase OS=Mus musculus OX=10090 GN=Cnp PE=1 SV=3	[R].LDEDLAGYCR.[R]	1xCarbamidomethyl [C9]; 1xTMTpro [N-Term]	4.58725e-06	4.83621e-05	1	1	1	4	P16330 [103-112]	P16330 1xCarbamidomethyl [C111]	0	1515.74	1.193	0.782497	0.930821	2890.7	2423.9	12.17	35.08	3112.5	3002.2	2339.4	2783.4	4191.2	2406.6	2020.3	2441.3		High	High	High	High	High	High	High	High	High	High	2.13e-05	0.0003185	8.995e-07	0.01022	57	2.41	100
P16330	2',3'-cyclic-nucleotide 3'-phosphodiesterase OS=Mus musculus OX=10090 GN=Cnp PE=1 SV=3	[R].LDEDLAGYCRR.[D]	1xCarbamidomethyl [C9]; 1xTMTpro [N-Term]	2.3996e-05	4.83621e-05	1	1	1	2	P16330 [103-113]	P16330 1xCarbamidomethyl [C111]	1	1671.84	1.272	0.792984	0.933964	2102.4	1652.9	16.09	45.61	2222.5	2236.6	1547.6	1988.7	3326.1	1637	1317.7	1668.9		High	High	High	High	High	High	High	High	High	Low	2.13e-05	0.5835	8.045e-06	0.96	35	3.61	100
Q925I1	ATPase family AAA domain-containing protein 3 OS=Mus musculus OX=10090 GN=Atad3 PE=1 SV=1	[R].IDEMVCFALPQREER.[E]	1xCarbamidomethyl [C6]; 1xTMTpro [N-Term]	1.30939e-06	4.83621e-05	1	1	1	1	Q925I1 [466-480]	Q925I1 1xCarbamidomethyl [C471]	1	2197.11	1.067	0.0561911	0.351903	952.6	892.4	3.98	1.86	944.8	960.5	901.3	992.2	888.9	919.4	880.5	895.9		High	High	High	High	High	High	High	High	High	n/a	2.13e-05		1.746e-07		27		100
Q3UHD2	Glucose-fructose oxidoreductase domain-containing protein 1 OS=Mus musculus OX=10090 GN=Gfod1 PE=1 SV=1	[R].IDEVLLHQDVDLVCINLPPPLTR.[Q]	1xCarbamidomethyl [C14]; 1xTMTpro [N-Term]	1.02163e-08	4.83621e-05	1	1	1	1	Q3UHD2 [55-77]	Q3UHD2 1xCarbamidomethyl [C68]	0	2973.64	0.998	0.891631	0.970771	307.6	308.2	6.35	3.96	275.8	314.9	300.4	317.7	312.1	285.7	308.8	307.5		High	High	High	High	High	High	High	High	High	n/a	2.13e-05		3.07e-10		56		100
O70566	Protein diaphanous homolog 2 OS=Mus musculus OX=10090 GN=Diaph2 PE=1 SV=2	[R].IDFDFTHLLDACVNK.[A]	1xCarbamidomethyl [C12]; 1xTMTpro [K15]; 1xTMTpro [N-Term]	1.90527e-07	4.83621e-05	1	1	1	2	O70566 [472-486]	O70566 1xCarbamidomethyl [C483]	0	2416.28	0.919	0.885184	0.968184	2128.6	2316.3	16.9	7.62	2209.8	1997.2	2832.4	2050.3	2061.3	2238.3	2446.6	2397.1		High	High	High	High	High	High	High	High	High	n/a	2.13e-05		1.398e-08		45		100
Q80XI3	Eukaryotic translation initiation factor 4 gamma 3 OS=Mus musculus OX=10090 GN=Eif4g3 PE=1 SV=2	[K].LDFTESEGPCSSEALSK.[K]	1xCarbamidomethyl [C10]; 1xTMTpro [K17]; 1xTMTpro [N-Term]	6.05793e-07	4.83621e-05	1	1	1	1	Q80XI3 [1396-1412]	Q80XI3 1xCarbamidomethyl [C1405]	0	2465.24	0.904	0.546953	0.827889	1142.2	1263.7	15.4	2.71	1106.9	1127.5	1505.2	1157	1257.9	1269.4	1250	1326.4		High	High	High	High	High	High	High	High	High	Low	2.13e-05	0.9598	6.347e-08	1	40	0.82	100
P61161	Actin-related protein 2 OS=Mus musculus OX=10090 GN=Actr2 PE=1 SV=1	[K].LCYVGYNIEQEQK.[L]	1xCarbamidomethyl [C2]; 1xTMTpro [K13]; 1xTMTpro [N-Term]	1.58452e-08	4.83621e-05	1	1	1	5	P61161 [220-232]	P61161 1xCarbamidomethyl [C221]	0	2252.19	0.905	0.799146	0.93625	4012	4433.6	13.58	10.96	3802.4	3603.5	4869.3	4233.2	3526	4402.7	4464.7	4476.6		High	High	High	High	High	High	High	High	High	Low	2.13e-05	0.9599	5.44e-10	1	50	1.91	100
Q3TEA8	Heterochromatin protein 1-binding protein 3 OS=Mus musculus OX=10090 GN=Hp1bp3 PE=1 SV=1	[K].TCSTTALK.[K]	1xCarbamidomethyl [C2]; 1xTMTpro [K8]; 1xTMTpro [N-Term]	9.37196e-05	4.83621e-05	1	1	1	2	Q3TEA8 [358-365]	Q3TEA8 1xCarbamidomethyl [C359]	0	1489.85	1.316	0.0281133	0.273421	1631.7	1240.1	7.74	16.57	1652.8	1610.9	1455.1	1756.9	893.9	1339	1241	1239.2		High	High	High	High	High	High	High	High	High	n/a	2.13e-05		5.399e-05		39		100
Q9D892	Inosine triphosphate pyrophosphatase OS=Mus musculus OX=10090 GN=Itpa PE=1 SV=2	[K].LEEVIQILGDNFPCTLEAQK.[I]	1xCarbamidomethyl [C14]; 1xTMTpro [K20]; 1xTMTpro [N-Term]	5.07327e-08	4.83621e-05	1	1	1	1	Q9D892 [20-39]	Q9D892 1xCarbamidomethyl [C33]	0	2925.59	1.608	0.00147947	0.11137	869.2	540.7	13.61	7.7	735.7	864.5	1026.8	874	463.2	547.8	545.5	536		High	High	High	High	High	High	High	High	High	n/a	2.13e-05		2.491e-09		33		100
Q60875	Rho guanine nucleotide exchange factor 2 OS=Mus musculus OX=10090 GN=Arhgef2 PE=1 SV=4	[R].TGMLEELQMEPEVVQGLFPCVDELSDIHTR.[F]	1xCarbamidomethyl [C20]; 1xTMTpro [N-Term]	1.12326e-09	4.83621e-05	1	1	1	1	Q60875 [264-293]	Q60875 1xCarbamidomethyl [C283]	0	3776.85	0.846	0.00499573	0.151879	262.4	310.1	3.48	6.02	270.9	258.8	250	266	329.8	298.2	322.4	290.9		High	High	High	High	High	High	High	High	High	n/a	2.13e-05		1.712e-11		47		100
Q9JI90	E3 ubiquitin-protein ligase RNF14 OS=Mus musculus OX=10090 GN=Rnf14 PE=1 SV=2	[K].LFLCSICFCEK.[L]	3xCarbamidomethyl [C4; C7; C9]; 1xTMTpro [K11]; 1xTMTpro [N-Term]	7.34564e-07	4.83621e-05	1	1	1	2	Q9JI90 [218-228]	Q9JI90 3xCarbamidomethyl [C221; C224; C226]	0	2085.08	1.096	0.0921817	0.423394	1215.4	1109.4	6.08	5.34	1145.3	1174.3	1258	1306.2	1211.2	1097.1	1073.9	1121.8		High	High	High	High	High	High	High	High	High	n/a	2.13e-05		8.207e-08		44		100
Q80XQ2	TBC1 domain family member 5 OS=Mus musculus OX=10090 GN=Tbc1d5 PE=1 SV=2	[K].LFLCVLPQDK.[S]	1xCarbamidomethyl [C4]; 1xTMTpro [K10]; 1xTMTpro [N-Term]	1.1784e-05	4.83621e-05	1	1	1	2	Q80XQ2 [93-102]	Q80XQ2 1xCarbamidomethyl [C96]	0	1841.09	0.926	0.352258	0.709391	1137.5	1227.9	9.72	4.03	1091.3	1063.5	1314.1	1185.6	1278.5	1249.8	1166	1206.4		High	High	High	High	High	High	High	High	High	n/a	2.13e-05		3.133e-06		41		100
O35066	Kinesin-like protein KIF3C OS=Mus musculus OX=10090 GN=Kif3c PE=1 SV=3	[R].LFLDCEEEQWR.[F]	1xCarbamidomethyl [C5]; 1xTMTpro [N-Term]	9.73842e-06	4.83621e-05	1	1	1	1	O35066 [652-662]	O35066 1xCarbamidomethyl [C656]	0	1828.89	1.093	0.639359	0.871649	911.3	833.5	15.2	6.74	891.1	1002.6	690.9	931.9	903.6	822.8	844.3	767.5		High	High	High	High	High	High	High	High	High	n/a	2.13e-05		2.427e-06		22		100
P70310	Neurotensin receptor type 2 OS=Mus musculus OX=10090 GN=Ntsr2 PE=2 SV=2	[K].LFLESLSSLCGEQR.[S]	1xCarbamidomethyl [C10]; 1xTMTpro [N-Term]	1.17678e-09	4.83621e-05	1	1	1	2	P70310 [368-381]	P70310 1xCarbamidomethyl [C377]	0	1943.02	0.876	0.0258108	0.266043	1116.6	1275	5.76	7.71	996.3	1110.3	1129.5	1122.9	1356.6	1330.5	1221.8	1146.9		High	High	High	High	High	High	High	High	High	Low	2.13e-05	0.8613	1.822e-11	1	58	1.33	100
P60229	Eukaryotic translation initiation factor 3 subunit E OS=Mus musculus OX=10090 GN=Eif3e PE=1 SV=1	[R].LFIFETFCR.[I]	1xCarbamidomethyl [C8]; 1xTMTpro [N-Term]	3.6892e-05	4.83621e-05	1	1	1	1	P60229 [338-346]	P60229 1xCarbamidomethyl [C345]	0	1536.82	1.193	0.0981841	0.43361	1040.1	871.9	7.46	11.56	925.2	1032.6	1109.9	1047.6	1036.6	924.1	815	822.6		High	High	High	High	High	High	High	High	High	n/a	2.13e-05		1.448e-05		29		100
Q91V24	ATP-binding cassette sub-family A member 7 OS=Mus musculus OX=10090 GN=Abca7 PE=1 SV=1	[R].TGLYLQQMPHPCYVDDVFLR.[V]	1xCarbamidomethyl [C12]; 1xTMTpro [N-Term]	8.6666e-10	4.83621e-05	1	1	1	1	Q91V24 [522-541]	Q91V24 1xCarbamidomethyl [C533]	0	2756.39	1.065	0.262471	0.632041	375.6	352.6	6.01	11.58	368.3	416.5	367	383.1	397.9	379.8	327.3	312.2		High	High	High	High	High	High	High	High	High	n/a	2.13e-05		1.215e-11		64		100
Q8BXK8	Arf-GAP with GTPase, ANK repeat and PH domain-containing protein 1 OS=Mus musculus OX=10090 GN=Agap1 PE=1 SV=1	[K].LFLAPLPCTEFSLGQQLLR.[A]	1xCarbamidomethyl [C8]; 1xTMTpro [N-Term]	1.33052e-07	4.83621e-05	1	1	1	2	Q8BXK8 [720-738]	Q8BXK8 1xCarbamidomethyl [C727]	0	2507.4	1.043	0.0955209	0.42863	619	593.3	4.69	3.65	588.4	655.3	606.9	631.3	597.3	589.3	597.9	552.9		High	High	High	High	High	High	High	High	High	n/a	2.13e-05		8.769e-09		84		100
Q8BGT5	Alanine aminotransferase 2 OS=Mus musculus OX=10090 GN=Gpt2 PE=1 SV=1	[K].LFLLADEVYQDNVYSPDCR.[F]	1xCarbamidomethyl [C18]; 1xTMTpro [N-Term]	5.85992e-07	4.83621e-05	1	1	1	1	Q8BGT5 [293-311]	Q8BGT5 1xCarbamidomethyl [C310]	0	2621.29	0.984	0.378079	0.72554	443.1	450.4	3.08	2.79	441.2	445.1	456	423.3	463.2	436.8	458.4	442.5		High	High	High	High	High	High	High	High	High	n/a	2.13e-05		6.071e-08		71		100
Q6GYP7	Ral GTPase-activating protein subunit alpha-1 OS=Mus musculus OX=10090 GN=Ralgapa1 PE=1 SV=1	[R].TGISLNVPAPQPLCISEK.[Q]	1xCarbamidomethyl [C14]; 1xTMTpro [K18]; 1xTMTpro [N-Term]	6.51294e-06	4.83621e-05	1	1	1	1	Q6GYP7 [1698-1715]	Q6GYP7 1xCarbamidomethyl [C1711]	0	2532.44	1.166	0.0185349	0.23769	245.9	210.9	7.65	4.99	228.4	231.8	264.3	260.9	198	207.5	214.3	222.9		High	High	High	High	High	High	High	High	High	n/a	2.13e-05		1.426e-06		26		100
Q7TN83	Synaptotagmin-16 OS=Mus musculus OX=10090 GN=Syt16 PE=1 SV=1	[K].LFLLNCVGQEMSR.[C]	1xCarbamidomethyl [C6]; 1xTMTpro [N-Term]	2.96849e-05	4.83621e-05	1	1	1	1	Q7TN83 [541-553]	Q7TN83 1xCarbamidomethyl [C546]	0	1870.98	1.057	0.22805	0.597455	273.5	258.7	7.52	5.73	265.9	281.3	258.5	305.8	245.5	252.7	279.6	264.7		High	High	High	High	High	High	High	High	High	n/a	2.13e-05		1.077e-05		43		100
Q8BWQ6	VPS35 endosomal protein-sorting factor-like OS=Mus musculus OX=10090 GN=Vps35l PE=1 SV=2	[K].TGISECLPR.[L]	1xCarbamidomethyl [C6]; 1xTMTpro [N-Term]	4.13531e-05	4.83621e-05	1	1	1	1	Q8BWQ6 [310-318]	Q8BWQ6 1xCarbamidomethyl [C315]	0	1336.72	0.986	0.899806	0.972828	732.6	743.3	3.47	9.27	694.9	727.7	755	737.6	804.5	774.8	650.9	713.1		High	High	High	High	High	High	High	High	High	n/a	2.13e-05		1.689e-05		30		100
P28650	Adenylosuccinate synthetase isozyme 1 OS=Mus musculus OX=10090 GN=Adss1 PE=1 SV=2	[R].TGLRICDLLSDFDEFSAR.[F]	1xCarbamidomethyl [C6]; 1xTMTpro [N-Term]	1.80991e-08	4.83621e-05	1	1	1	1	P28650 [178-195]	P28650 1xCarbamidomethyl [C183]	1	2419.22	1.255	0.206236	0.577558	902.7	719.4	15.23	11.37	894.7	918	651.6	910.8	833.9	711.4	633.2	727.4		High	High	High	High	High	High	High	High	High	n/a	2.13e-05		6.465e-10		35		100
Q9JLI8	Squamous cell carcinoma antigen recognized by T-cells 3 OS=Mus musculus OX=10090 GN=Sart3 PE=1 SV=1	[K].LFISGLPFSCTK.[E]	1xCarbamidomethyl [C10]; 1xTMTpro [K12]; 1xTMTpro [N-Term]	4.66103e-05	4.83621e-05	1	1	1	2	Q9JLI8 [803-814]	Q9JLI8 1xCarbamidomethyl [C812]	0	1978.13	0.956	0.133484	0.488646	1454.2	1521.3	4.88	3.88	1404.2	1500.5	1409.3	1550.3	1508.6	1636.4	1518.6	1524.1		High	High	High	High	High	High	High	High	High	n/a	2.13e-05		1.995e-05		18		100
Q61733	28S ribosomal protein S31, mitochondrial OS=Mus musculus OX=10090 GN=Mrps31 PE=1 SV=1	[R].LFMELVTCGLSK.[N]	1xCarbamidomethyl [C8]; 1xTMTpro [K12]; 1xTMTpro [N-Term]	3.55937e-07	4.83621e-05	1	1	1	2	Q61733 [338-349]	Q61733 1xCarbamidomethyl [C345]	0	2006.13	0.994	0.767046	0.924837	1280	1288.2	7.02	7.21	1189.8	1241.1	1320.2	1395.7	1227.2	1421.4	1346.6	1232.4		High	High	High	High	High	High	High	High	High	n/a	2.13e-05		3.181e-08		32		100
Q6NS52	Diacylglycerol kinase beta OS=Mus musculus OX=10090 GN=Dgkb PE=1 SV=2	[K].TGLFCSLIK.[R]	1xCarbamidomethyl [C5]; 1xTMTpro [K9]; 1xTMTpro [N-Term]	2.30818e-05	4.83621e-05	1	1	1	2	Q6NS52 [786-794]	Q6NS52 1xCarbamidomethyl [C790]	0	1646.98	0.802	0.133169	0.488206	2125.9	2649.9	6.77	16.43	2113.6	1863.9	2138.2	2169.6	1905.3	2604.8	2826.9	2695.8		High	High	High	High	High	High	High	High	High	n/a	2.13e-05		7.624e-06		48		100
Q80UM3	N-alpha-acetyltransferase 15, NatA auxiliary subunit OS=Mus musculus OX=10090 GN=Naa15 PE=1 SV=1	[R].LFHSVCESK.[D]	1xCarbamidomethyl [C6]; 1xTMTpro [K9]; 1xTMTpro [N-Term]	6.17762e-06	4.83621e-05	1	1	1	2	Q80UM3 [715-723]	Q80UM3 1xCarbamidomethyl [C720]	0	1714.94	1.027	0.427187	0.759863	1024.2	997.5	2.88	3.64	1038	990.3	1057.2	1010.5	976.9	1049.1	1018.7	971.9		High	High	High	High	High	High	High	High	High	n/a	2.13e-05		1.338e-06		37		100
P70297	Signal transducing adapter molecule 1 OS=Mus musculus OX=10090 GN=Stam PE=1 SV=3	[K].IFHLEVCSR.[D]	1xCarbamidomethyl [C7]; 1xTMTpro [N-Term]	8.73697e-05	4.83621e-05	1	2	1	7	P70297 [79-87]	P70297 1xCarbamidomethyl [C85]	0	1464.8	1.076	0.146764	0.506339	2823.7	2623.6	6.47	3.98	2644.2	3081.2	2776.7	2871.5	2587.2	2816.3	2650.5	2596.9		High	High	High	High	High	High	High	High	High	High	2.13e-05	0.0003185	4.856e-05	0.00508	47	2.17	100
O88343	Electrogenic sodium bicarbonate cotransporter 1 OS=Mus musculus OX=10090 GN=Slc4a4 PE=1 SV=2	[R].TGRFCGGLIK.[D]	1xCarbamidomethyl [C5]; 1xTMTpro [K10]; 1xTMTpro [N-Term]	2.18323e-06	4.83621e-05	1	1	1	2	O88343 [439-448]	O88343 1xCarbamidomethyl [C443]	1	1717.01	0.845	0.377161	0.724954	2494.8	2951.6	14.35	31.64	2434.6	2150.1	3025.8	2556.5	4230.6	3655	2195.3	2383.5		High	High	High	High	High	High	High	High	High	High	2.13e-05	0.0003185	3.409e-07	0.001065	30	3.47	100
A2ASZ8	Calcium-binding mitochondrial carrier protein SCaMC-2 OS=Mus musculus OX=10090 GN=Slc25a25 PE=1 SV=1	[K].TGQYSGMLDCARR.[I]	1xCarbamidomethyl [C10]; 1xTMTpro [N-Term]	5.66892e-06	4.83621e-05	1	1	1	1	A2ASZ8 [313-325]	A2ASZ8 1xCarbamidomethyl [C322]	1	1818.89	1.071	0.793584	0.934218	415.3	388	14.85	29.96	399.8	419.8	410.9	540.7	620.8	422.8	336	356		High	High	High	High	High	High	High	High	High	Low	2.13e-05	0.9566	1.192e-06	1	26	2.15	100
P11881	Inositol 1,4,5-trisphosphate receptor type 1 OS=Mus musculus OX=10090 GN=Itpr1 PE=1 SV=2	[K].LFENFLVDICR.[A]	1xCarbamidomethyl [C10]; 1xTMTpro [N-Term]	1.29211e-06	4.83621e-05	1	1	1	4	P11881 [1449-1459]	P11881 1xCarbamidomethyl [C1458]	0	1729.93	0.936	0.605445	0.857434	2141.7	2288.3	11.88	34.95	2036	2252.9	1964.2	2546	2503.6	3753.4	2091.6	1731.3		High	High	High	High	High	High	High	High	High	High	2.13e-05	0.0003185	1.72e-07	0.001066	49	2.79	100
P11881	Inositol 1,4,5-trisphosphate receptor type 1 OS=Mus musculus OX=10090 GN=Itpr1 PE=1 SV=2	[K].LFENFLVDICRACNNTSDR.[K]	2xCarbamidomethyl [C10; C13]; 1xTMTpro [N-Term]	3.08101e-08	4.83621e-05	1	1	1	1	P11881 [1449-1467]	P11881 2xCarbamidomethyl [C1458; C1461]	1	2648.29	1.218	0.529003	0.819069	897.3	736.9	8.19	23.13	875.2	920	769.9	922.8	735.2	1101.2	738.6	699.1		High	High	High	High	High	High	High	High	n/a	High		0.0005594		0.03326		2.95	100
P48774	Glutathione S-transferase Mu 5 OS=Mus musculus OX=10090 GN=Gstm5 PE=1 SV=1	[R].IFEPKCLDEFPNLK.[A]	1xCarbamidomethyl [C6]; 2xTMTpro [K5; K14]; 1xTMTpro [N-Term]	2.12157e-05	4.83621e-05	1	1	1	2	P48774 [172-185]	P48774 1xCarbamidomethyl [C177]	1	2662.51	1.046	0.372732	0.7229	1917.2	1832.7	13.37	4.72	2072.5	1773.5	2310.5	1757.5	1742.3	1777.5	1889.6	1922.3		High	High	High	High	High	High	High	High	n/a	High		0.0005594		0.02651		3.28	100
A2ASZ8	Calcium-binding mitochondrial carrier protein SCaMC-2 OS=Mus musculus OX=10090 GN=Slc25a25 PE=1 SV=1	[K].TGQYSGMLDCAR.[R]	1xCarbamidomethyl [C10]; 1xTMTpro [N-Term]	1.09718e-07	4.83621e-05	1	1	1	1	A2ASZ8 [313-324]	A2ASZ8 1xCarbamidomethyl [C322]	0	1662.79	1.07	0.792762	0.933953	1238.5	1157.1	3.24	32.87	1216.9	1273.7	1186.7	1260.6	1973.8	1273.1	1042.3	1051.7		High	High	High	High	High	High	High	High	High	n/a	2.13e-05		6.835e-09		53		100
Q91W50	Cold shock domain-containing protein E1 OS=Mus musculus OX=10090 GN=Csde1 PE=1 SV=1	[R].LFFHCSQYNGNLQDLK.[V]	1xCarbamidomethyl [C5]; 1xTMTpro [K16]; 1xTMTpro [N-Term]	1.71914e-09	4.83621e-05	1	1	1	2	Q91W50 [49-64]	Q91W50 1xCarbamidomethyl [C53]	0	2592.35	0.925	0.139357	0.496998	2227.6	2409.2	7.4	4.64	2515.6	2232.5	2124.7	2222.6	2358	2405	2413.5	2614.1		High	High	High	High	High	High	High	High	High	n/a	2.13e-05		2.995e-11		57		100
Q8C3Q9	Caspase-9 OS=Mus musculus OX=10090 GN=Casp9 PE=1 SV=1	[K].LFFIQACGGEQK.[D]	1xCarbamidomethyl [C7]; 1xTMTpro [K12]; 1xTMTpro [N-Term]	3.76024e-05	4.83621e-05	1	1	1	1	Q8C3Q9 [319-330]	Q8C3Q9 1xCarbamidomethyl [C325]	0	2006.1	1.102	0.0302874	0.281821	544.1	493.7	2.07	5.21	547.1	530.4	541.2	557.3	528.5	469.3	504.4	483.2		High	High	High	High	High	High	High	High	High	n/a	2.13e-05		1.479e-05		42		100
O89110	Caspase-8 OS=Mus musculus OX=10090 GN=Casp8 PE=1 SV=1	[K].IFFIQACQGSNFQK.[G]	1xCarbamidomethyl [C7]; 1xTMTpro [K14]; 1xTMTpro [N-Term]	2.96849e-05	4.83621e-05	1	1	1	1	O89110 [356-369]	O89110 1xCarbamidomethyl [C362]	0	2296.24	0.985	0.267388	0.636293	637	646.6	4.17	3.52	642.3	631.8	648.5	590.3	657.1	627	678.3	636.3		High	High	High	High	High	High	High	High	High	n/a	2.13e-05		1.073e-05		23		100
Q91W89	Alpha-mannosidase 2C1 OS=Mus musculus OX=10090 GN=Man2c1 PE=1 SV=1	[R].LFGDSCSVTLSSFLTPER.[L]	1xCarbamidomethyl [C6]; 1xTMTpro [N-Term]	1.77472e-12	4.83621e-05	1	1	1	3	Q91W89 [35-52]	Q91W89 1xCarbamidomethyl [C40]	0	2320.18	1.147	0.0390828	0.308347	2576.5	2247.2	11.18	7.59	2457.9	2592.7	3126.4	2560.5	2289	2206.1	2032.1	2440.4		High	High	High	High	High	High	High	High	High	n/a	2.13e-05		3.754e-15		127		100
P09411	Phosphoglycerate kinase 1 OS=Mus musculus OX=10090 GN=Pgk1 PE=1 SV=4	[K].TGQATVASGIPAGWMGLDCGTESSKK.[Y]	1xCarbamidomethyl [C19]; 2xTMTpro [K25; K26]; 1xTMTpro [N-Term]	1.2961e-11	4.83621e-05	1	1	1	3	P09411 [298-323]	P09411 1xCarbamidomethyl [C316]	1	3521.85	0.893	0.788046	0.932158	2456.5	2751.8	23.27	25.41	2915.7	1995.7	3161.1	2069.6	1855.7	2394.8	3162.1	3311.6		High	High	High	High	High	High	High	High	High	n/a	2.13e-05		5.042e-14		43		100
P09411	Phosphoglycerate kinase 1 OS=Mus musculus OX=10090 GN=Pgk1 PE=1 SV=4	[K].TGQATVASGIPAGWMGLDCGTESSK.[K]	1xCarbamidomethyl [C19]; 1xTMTpro [K25]; 1xTMTpro [N-Term]	1.81307e-09	4.83621e-05	1	1	1	2	P09411 [298-322]	P09411 1xCarbamidomethyl [C316]	0	3089.55	0.982	0.908559	0.975636	1899.7	1933.6	11.89	15.78	2047.4	1654.7	2128.3	1762.6	1512.5	1774.9	2106.5	2140.5		High	High	High	High	High	High	High	High	High	n/a	2.13e-05		3.205e-11		87		100
Q61830	Macrophage mannose receptor 1 OS=Mus musculus OX=10090 GN=Mrc1 PE=1 SV=2	[K].LFGFCPLHFEGSER.[L]	1xCarbamidomethyl [C5]; 1xTMTpro [N-Term]	2.47659e-06	4.83621e-05	1	1	1	2	Q61830 [205-218]	Q61830 1xCarbamidomethyl [C209]	0	2000	1.115	0.168009	0.53097	768.8	689.3	17.32	7.04	689.1	773.8	1012.3	763.7	645.6	727.6	652.9	738.6		High	High	High	High	High	High	High	High	High	n/a	2.13e-05		4.029e-07		53		100
Q5SUR0	Phosphoribosylformylglycinamidine synthase OS=Mus musculus OX=10090 GN=Pfas PE=1 SV=1	[R].TGPSYYLPPTFPVASVPCKPGGPVPR.[V]	1xCarbamidomethyl [C18]; 1xTMTpro [K19]; 1xTMTpro [N-Term]	1.09568e-10	4.83621e-05	1	1	1	2	Q5SUR0 [1038-1063]	Q5SUR0 1xCarbamidomethyl [C1055]	1	3349.83	1.028	0.236534	0.607007	801	779	10.6	2.58	805	797.1	971.7	782.2	786.6	749.2	794.8	771.4		High	High	High	High	High	High	High	High	High	n/a	2.13e-05		8.173e-13		57		100
Q9WVK8	Cholesterol 24-hydroxylase OS=Mus musculus OX=10090 GN=Cyp46a1 PE=1 SV=1	[R].LFGQGLVSECDYGR.[W]	1xCarbamidomethyl [C10]; 1xTMTpro [N-Term]	1.36887e-08	4.83621e-05	1	1	1	2	Q9WVK8 [120-133]	Q9WVK8 1xCarbamidomethyl [C129]	0	1904.95	0.954	0.377813	0.725415	1724.6	1807.5	6.68	4.27	1675	1851.2	1588.2	1775.7	1799.2	1858.5	1815.9	1680.1		High	High	High	High	High	High	High	High	High	n/a	2.13e-05		4.482e-10		36		100
Q8BNV1	tRNA (uracil-5-)-methyltransferase homolog A OS=Mus musculus OX=10090 GN=Trmt2a PE=1 SV=2	[K].LFGQPPCAFVTFR.[S]	1xCarbamidomethyl [C7]; 1xTMTpro [N-Term]	0.000103953	4.83621e-05	1	1	1	1	Q8BNV1 [95-107]	Q8BNV1 1xCarbamidomethyl [C101]	0	1843.98	1.124	0.0939039	0.425232	282	251	8.24	0.94	269.7	300	250.7	295	250.3	249.3	254.7	251.6		High	High	High	High	High	High	High	High	High	n/a	3.58e-05		0.0005545		21		100
Q80TN4	DnaJ homolog subfamily C member 16 OS=Mus musculus OX=10090 GN=Dnajc16 PE=1 SV=2	[R].LFHELCPVK.[R]	1xCarbamidomethyl [C6]; 1xTMTpro [K9]; 1xTMTpro [N-Term]	2.78362e-05	4.83621e-05	1	1	1	1	Q80TN4 [368-376]	Q80TN4 1xCarbamidomethyl [C373]	0	1751.02	0.982	0.436825	0.764335	615.1	626.6	12.42	6.05	612.1	627	474.8	618.1	650.1	611.8	641.9	567.4		High	High	High	High	High	High	High	High	High	n/a	2.13e-05		9.821e-06		37		100
Q60854	Serpin B6 OS=Mus musculus OX=10090 GN=Serpinb6 PE=1 SV=1	[R].LFGDKTCDLLASFK.[D]	1xCarbamidomethyl [C7]; 2xTMTpro [K5; K14]; 1xTMTpro [N-Term]	3.78421e-05	4.83621e-05	1	1	1	1	Q60854 [96-109]	Q60854 1xCarbamidomethyl [C102]	1	2527.44	0.962	0.5175	0.81169	195.1	202.9	7.19	8.74	197.2	178.5	212.6	193	183.1	195.9	224.2	210.1		High	High	High	High	High	High	High	High	n/a	High		0.0003185		0.01173		1.86	100
Q9JJ28	Protein flightless-1 homolog OS=Mus musculus OX=10090 GN=Flii PE=1 SV=1	[R].TGLCYLPEELAALQK.[L]	1xCarbamidomethyl [C4]; 1xTMTpro [K15]; 1xTMTpro [N-Term]	6.73764e-07	4.83621e-05	1	1	1	1	Q9JJ28 [43-57]	Q9JJ28 1xCarbamidomethyl [C46]	0	2314.3	0.927	0.0496191	0.335092	847.3	913.8	3.03	5.97	846.9	803.6	862.5	847.8	868.8	878	951	980.8		High	High	High	High	High	High	High	High	High	n/a	2.13e-05		7.318e-08		45		100
P12960	Contactin-1 OS=Mus musculus OX=10090 GN=Cntn1 PE=1 SV=1	[K].IFNIQLEDEGLYECEAENIR.[G]	1xCarbamidomethyl [C14]; 1xTMTpro [N-Term]	1.4681e-10	4.83621e-05	1	1	1	58	P12960 [297-316]	P12960 1xCarbamidomethyl [C310]	0	2759.35	0.945	0.381301	0.727396	22111.8	23407.3	6.46	4.12	21072.3	23189.5	21084.2	23865.8	23850.9	23038.9	23781.4	21798.1		High	High	High	High	High	High	High	High	High	n/a	2.13e-05		1.197e-12		98		100
Q91YT0	NADH dehydrogenase [ubiquinone] flavoprotein 1, mitochondrial OS=Mus musculus OX=10090 GN=Ndufv1 PE=1 SV=1	[K].LFNISGHVNHPCTVEEEMSVPLK.[E]	1xCarbamidomethyl [C12]; 1xTMTpro [K23]; 1xTMTpro [N-Term]	1.03711e-09	4.83621e-05	1	1	1	3	Q91YT0 [275-297]	Q91YT0 1xCarbamidomethyl [C286]	0	3245.69	0.886	0.292406	0.66087	3343.3	3772.9	23.01	6.38	4232.6	3495.4	2382.1	3197.7	3670.5	3562.1	3878.1	4112.4		High	High	High	High	High	High	High	High	High	Low	2.13e-05	0.8424	1.545e-11	1	46	1.02	100
Q9CZV8	F-box/LRR-repeat protein 20 OS=Mus musculus OX=10090 GN=Fbxl20 PE=1 SV=3	[R].IFSFLDVVTLCR.[C]	1xCarbamidomethyl [C11]; 1xTMTpro [N-Term]	4.67926e-06	4.83621e-05	1	1	1	1	Q9CZV8 [36-47]	Q9CZV8 1xCarbamidomethyl [C46]	0	1773.99	0.993	0.590625	0.849794	641.5	645.9	5.86	3.58	620.5	663.1	597.2	678.4	684.2	653.9	632.1	637.9		High	High	High	High	High	High	High	High	High	n/a	2.13e-05		9.259e-07		23		100
Q0GA42	Metal transporter CNNM1 OS=Mus musculus OX=10090 GN=Cnnm1 PE=1 SV=5	[K].LFSLCAWDGR.[A]	1xCarbamidomethyl [C5]; 1xTMTpro [N-Term]	6.3942e-05	4.83621e-05	1	1	1	1	Q0GA42 [183-192]	Q0GA42 1xCarbamidomethyl [C187]	0	1528.79	1.031	0.823751	0.944255	1523.5	1477.3	9.73	11.85	1505.3	1541.8	1262.6	1580.6	1725.6	1555.9	1402.6	1322.3		High	High	High	High	High	High	High	High	High	n/a	2.13e-05		3.092e-05		30		100
P08556	GTPase NRas OS=Mus musculus OX=10090 GN=Nras PE=1 SV=1	[R].TGEGFLCVFAINNSK.[S]	1xCarbamidomethyl [C7]; 1xTMTpro [K15]; 1xTMTpro [N-Term]	5.18365e-05	4.83621e-05	1	1	1	1	P08556 [74-88]	P08556 1xCarbamidomethyl [C80]	0	2265.22	0.89	0.046109	0.325717	648.3	728.1	7.14	5	698.8	586.6	653	643.6	678.3	707.7	754.6	749		High	High	High	High	High	High	High	High	High	n/a	2.13e-05		2.299e-05		43		100
Q6P2B1	Transportin-3 OS=Mus musculus OX=10090 GN=Tnpo3 PE=1 SV=1	[R].IFTELCETFLEK.[I]	1xCarbamidomethyl [C6]; 1xTMTpro [K12]; 1xTMTpro [N-Term]	5.13048e-07	4.83621e-05	1	1	1	3	Q6P2B1 [298-309]	Q6P2B1 1xCarbamidomethyl [C303]	0	2138.17	0.93	0.964776	0.98998	1836.6	1973.8	18.02	4.94	1814.1	1797	2543.6	1859.3	1896.4	1938.8	2009.4	2121.5		High	High	High	High	High	High	High	High	High	n/a	2.13e-05		5.106e-08		71		100
Q6VNB8	WD repeat and FYVE domain-containing protein 3 OS=Mus musculus OX=10090 GN=Wdfy3 PE=1 SV=1	[R].LFTELCHPPR.[H]	1xCarbamidomethyl [C6]; 1xTMTpro [N-Term]	3.42746e-06	4.83621e-05	1	1	1	1	Q6VNB8 [31-40]	Q6VNB8 1xCarbamidomethyl [C36]	0	1573.85	1.078	0.250905	0.621701	251.5	233.3	8.23	4.55	247.9	255.1	219.5	267.6	242.2	238.7	218.9	228.1		High	High	High	High	High	High	High	High	High	n/a	2.13e-05		6.136e-07		83		100
Q9DCM0	Persulfide dioxygenase ETHE1, mitochondrial OS=Mus musculus OX=10090 GN=Ethe1 PE=1 SV=2	[K].IFTLPGNCLIYPAHDYHGLTVSTVEEER.[T]	1xCarbamidomethyl [C8]; 1xTMTpro [N-Term]	5.64279e-08	4.83621e-05	1	1	1	2	Q9DCM0 [182-209]	Q9DCM0 1xCarbamidomethyl [C189]	0	3535.79	1.167	0.00495434	0.151836	716.6	614.3	5.37	2.93	681.4	767.1	697.3	736.3	599.9	642.9	616.1	612.5		High	High	High	High	High	High	High	High	High	n/a	2.13e-05		2.86e-09		63		100
Q9D7V2	LysM and putative peptidoglycan-binding domain-containing protein 2 OS=Mus musculus OX=10090 GN=Lysmd2 PE=1 SV=2	[K].LFTNDCIFLK.[K]	1xCarbamidomethyl [C6]; 1xTMTpro [K10]; 1xTMTpro [N-Term]	0.000102774	4.83621e-05	1	1	1	2	Q9D7V2 [101-110]	Q9D7V2 1xCarbamidomethyl [C106]	0	1879.06	0.659	0.235751	0.606508	1444.8	2191.3	18.86	25.73	1405.2	1356.6	1994.5	1485.5	1252	2131.2	2253.1	2402.3		High	High	High	High	High	High	High	High	High	Low	2.13e-05	0.7037	6.226e-05	1	55	1.02	100
P42859	Huntingtin OS=Mus musculus OX=10090 GN=Htt PE=1 SV=2	[R].LFTSDGCEGSFYTLESLNAR.[V]	1xCarbamidomethyl [C7]; 1xTMTpro [N-Term]	1.58452e-08	4.83621e-05	1	1	1	1	P42859 [1781-1800]	P42859 1xCarbamidomethyl [C1787]	0	2571.24	1.011	0.739949	0.913603	688.6	680.9	4.53	1.75	646	709.6	708	669.8	660.1	677.3	684.6	685.9		High	High	High	High	High	High	High	High	High	n/a	2.13e-05		5.434e-10		77		100
P50544	Very long-chain specific acyl-CoA dehydrogenase, mitochondrial OS=Mus musculus OX=10090 GN=Acadvl PE=1 SV=3	[R].LFVALQGCMDK.[G]	1xCarbamidomethyl [C8]; 1xTMTpro [K11]; 1xTMTpro [N-Term]	1.1784e-05	4.83621e-05	1	1	1	3	P50544 [471-481]	P50544 1xCarbamidomethyl [C478]	0	1890.05	1.268	0.0613945	0.363373	2160.6	1703.7	6.34	14.08	2345.4	2161.5	2009.6	2159.7	2192.9	1721.3	1649.9	1686.3		High	High	High	High	High	High	High	High	High	n/a	2.13e-05		3.121e-06		54		100
Q8K2A7	Integrator complex subunit 10 OS=Mus musculus OX=10090 GN=Ints10 PE=1 SV=3	[K].LFVCDVLPLIINNHDVR.[L]	1xCarbamidomethyl [C4]; 1xTMTpro [N-Term]	2.22425e-08	4.83621e-05	1	1	1	1	Q8K2A7 [173-189]	Q8K2A7 1xCarbamidomethyl [C176]	0	2341.3	1.057	0.403019	0.743138	452.6	428.4	10.06	7.32	419.7	488.2	417.9	506.9	474.5	425.3	431.6	398		High	High	High	High	High	High	High	High	High	n/a	2.13e-05		8.452e-10		55		100
P32883; Q61411	GTPase KRas OS=Mus musculus OX=10090 GN=Kras PE=1 SV=1 GTPase HRas OS=Mus musculus OX=10090 GN=Hras PE=1 SV=2	[R].TGEGFLCVFAINNTK.[S]	1xCarbamidomethyl [C7]; 1xTMTpro [K15]; 1xTMTpro [N-Term]	5.41448e-11	4.83621e-05	2	2	1	6	P32883 [74-88]; Q61411 [74-88]	P32883 1xCarbamidomethyl [C80]; Q61411 1xCarbamidomethyl [C80]	0	2279.23	0.848	0.696583	0.896861	3171	3740.8	18.28	18.63	3402.9	2886.2	4223.6	2954.9	2626.6	3610.3	3876.2	4151.8	Shared	High	High	High	High	High	High	High	High	High	Low	2.13e-05	0.9689	3.254e-13	1	109	2.18	100
P55264	Adenosine kinase OS=Mus musculus OX=10090 GN=Adk PE=1 SV=2	[R].TGCTFPEKPDFH.[-]	1xCarbamidomethyl [C3]; 1xTMTpro [K8]; 1xTMTpro [N-Term]	8.28488e-05	4.83621e-05	1	1	1	2	P55264 [350-361]	P55264 1xCarbamidomethyl [C352]	1	2044.05	1.092	0.0328576	0.288792	1547.1	1416.9	6.81	4.79	1760.3	1535	1543.9	1550.3	1344.3	1406.7	1427.1	1509.3		High	High	High	High	High	High	High	High	High	n/a	2.13e-05		4.504e-05		26		100
Q9JII5	DAZ-associated protein 1 OS=Mus musculus OX=10090 GN=Dazap1 PE=1 SV=2	[K].IFVGGIPHNCGETELR.[E]	1xCarbamidomethyl [C10]; 1xTMTpro [N-Term]	3.05468e-07	4.83621e-05	1	1	1	1	Q9JII5 [115-130]	Q9JII5 1xCarbamidomethyl [C124]	0	2103.1	1.145	0.0453398	0.324022	333	290.7	5.76	9.35	319.3	338.3	327.7	364.1	270.9	312.1	266.6	319.3		High	High	High	High	High	High	High	High	High	n/a	2.13e-05		2.597e-08		67		100
Q8C2Q3	RNA-binding protein 14 OS=Mus musculus OX=10090 GN=Rbm14 PE=1 SV=1	[K].IFVGNVDGADTTPEELAALFAPYGTVMSCAVMK.[Q]	1xCarbamidomethyl [C29]; 1xTMTpro [K33]; 1xTMTpro [N-Term]	5.77672e-10	4.83621e-05	1	1	1	1	Q8C2Q3 [3-35]	Q8C2Q3 1xCarbamidomethyl [C31]	0	4083.08	1.047	0.46117	0.77974	372.8	356	9.68	2.09	349.2	406.5	333.2	397.9	353.6	358.4	363.5	346.1		High	High	High	High	High	High	High	High	High	n/a	2.13e-05		7.158e-12		82		100
Q8C2Q3	RNA-binding protein 14 OS=Mus musculus OX=10090 GN=Rbm14 PE=1 SV=1	[K].IFVGNVSAACTSQELR.[S]	1xCarbamidomethyl [C10]; 1xTMTpro [N-Term]	2.22814e-09	4.83621e-05	1	1	1	2	Q8C2Q3 [81-96]	Q8C2Q3 1xCarbamidomethyl [C90]	0	2056.08	1.086	0.274215	0.643789	1628.7	1499.2	11.54	4.95	1588.1	1670.3	1350.3	1786.3	1510	1507.6	1490.9	1358.7		High	High	High	High	High	High	High	High	High	n/a	2.13e-05		4.195e-11		61		100
O54750	Cytochrome P450 2J6 OS=Mus musculus OX=10090 GN=Cyp2j6 PE=2 SV=2	[K].LFVSCMIDDHRK.[D]	1xCarbamidomethyl [C5]; 1xTMTpro [K12]; 1xTMTpro [N-Term]	9.70353e-05	4.83621e-05	1	1	1	1	O54750 [256-267]	O54750 1xCarbamidomethyl [C260]	1	2129.15	1.243	0.016071	0.224274	462.4	371.9	3.87	9.2	482.7	448.7	476.3	448.8	435.3	379.6	357.3	364.5		High	High	High	High	High	High	High	High	High	n/a	2.13e-05		5.71e-05		18		100
Q3UUI3	Acyl-coenzyme A thioesterase THEM4 OS=Mus musculus OX=10090 GN=Them4 PE=1 SV=1	[K].LFVSCTIQSIDEK.[T]	1xCarbamidomethyl [C5]; 1xTMTpro [K13]; 1xTMTpro [N-Term]	1.16695e-08	4.83621e-05	1	1	1	2	Q3UUI3 [198-210]	Q3UUI3 1xCarbamidomethyl [C202]	0	2148.19	1.161	0.073679	0.388578	1516	1305.6	14	8.79	1452.9	1449.3	1926.2	1581.9	1253.9	1491.6	1236.8	1359.4		High	High	High	High	High	High	High	High	High	n/a	2.13e-05		3.657e-10		78		100
P62874	Guanine nucleotide-binding protein G(I)/G(S)/G(T) subunit beta-1 OS=Mus musculus OX=10090 GN=Gnb1 PE=1 SV=3	[R].LFVSGACDASAK.[L]	1xCarbamidomethyl [C7]; 1xTMTpro [K12]; 1xTMTpro [N-Term]	3.49594e-08	4.83621e-05	1	1	1	10	P62874 [198-209]	P62874 1xCarbamidomethyl [C204]	0	1834	1.058	0.277962	0.648072	7061.3	6673.5	7.65	5.38	7527.3	7060	6244.9	7062.7	6074.9	6597.5	6750.3	6881		High	High	High	High	High	High	High	High	High	Low	2.13e-05	0.3617	1.537e-09	0.8229	72	1.37	100
P62874	Guanine nucleotide-binding protein G(I)/G(S)/G(T) subunit beta-1 OS=Mus musculus OX=10090 GN=Gnb1 PE=1 SV=3	[R].LFVSGACDASAKLWDVR.[E]	1xCarbamidomethyl [C7]; 1xTMTpro [K12]; 1xTMTpro [N-Term]	2.71761e-06	4.83621e-05	1	1	1	1	P62874 [198-214]	P62874 1xCarbamidomethyl [C204]	1	2503.36	1.084	0.776085	0.928629	1279.6	1180.7	17.35	7.48	1384.9	1383.6	937.8	1183.3	1151.3	1064.1	1269.9	1210.8		High	High	High	High	High	High	High	High	High	n/a	2.13e-05		4.549e-07		36		100
Q8BPN8	DmX-like protein 2 OS=Mus musculus OX=10090 GN=Dmxl2 PE=1 SV=3	[R].LFSCGADGTLK.[T]	1xCarbamidomethyl [C4]; 1xTMTpro [K11]; 1xTMTpro [N-Term]	7.90273e-07	4.83621e-05	1	1	1	2	Q8BPN8 [3004-3014]	Q8BPN8 1xCarbamidomethyl [C3007]	0	1776.98	0.857	0.0244707	0.260742	1114.9	1300.8	5.79	6.64	1187.4	1041.8	1146.2	1084.4	1158.5	1269.4	1342.4	1332.9		High	High	High	High	High	High	High	High	High	Low	2.13e-05	0.9461	8.995e-08	1	61	0.83	100
Q60625	Intercellular adhesion molecule 5 OS=Mus musculus OX=10090 GN=Icam5 PE=1 SV=2	[K].LFSCEVDGKPEPR.[V]	1xCarbamidomethyl [C4]; 1xTMTpro [K9]; 1xTMTpro [N-Term]	1.36134e-05	4.83621e-05	1	1	1	1	Q60625 [592-604]	Q60625 1xCarbamidomethyl [C595]	1	2142.15	0.657	0.0218706	0.25166	1385.6	2107.6	10.45	16.91	1681.4	1403.4	1366.4	1368.1	1608.9	1986.4	2413.2	2236.2		High	High	High	High	High	High	High	High	High	n/a	2.13e-05		4.616e-06		28		100
Q99MJ9	ATP-dependent RNA helicase DDX50 OS=Mus musculus OX=10090 GN=Ddx50 PE=2 SV=1	[R].TGICVCFYQPR.[E]	2xCarbamidomethyl [C4; C6]; 1xTMTpro [N-Term]	1.63023e-06	4.83621e-05	1	1	1	1	Q99MJ9 [482-492]	Q99MJ9 2xCarbamidomethyl [C485; C487]	0	1704.85	1	0.465121	0.781424	987.1	987	12.02	6.85	948.5	1031.9	787.6	1027.3	1088.1	938.8	1021.2	953.9		High	High	High	High	High	High	High	High	High	n/a	2.13e-05		2.324e-07		35		100
Q6P9R4	Rho guanine nucleotide exchange factor 18 OS=Mus musculus OX=10090 GN=Arhgef18 PE=1 SV=3	[R].LFPCADDLLDMHSHFLAR.[L]	1xCarbamidomethyl [C4]; 1xTMTpro [N-Term]	1.22849e-07	4.83621e-05	1	1	1	1	Q6P9R4 [529-546]	Q6P9R4 1xCarbamidomethyl [C532]	0	2462.23	0.973	0.397677	0.739014	328	336.9	2.12	6.65	322.2	325.7	330.3	338.4	370.3	318.6	345.7	328.3		High	High	High	High	High	High	High	High	High	n/a	2.13e-05		7.908e-09		91		100
Q8C547	HEAT repeat-containing protein 5B OS=Mus musculus OX=10090 GN=Heatr5b PE=1 SV=3	[R].TGHSLALGCLHR.[Y]	1xCarbamidomethyl [C9]; 1xTMTpro [N-Term]	1.96327e-06	4.83621e-05	1	1	1	2	Q8C547 [910-921]	Q8C547 1xCarbamidomethyl [C918]	0	1625.89	1.102	0.967874	0.99067	626.7	568.9	4.98	30.37	585.6	622.7	630.7	661.3	936.6	607.5	514.2	532.7		High	High	High	High	High	High	High	High	High	Low	2.13e-05	0.9498	2.971e-07	1	73	1.65	100
P97433	Rho guanine nucleotide exchange factor 28 OS=Mus musculus OX=10090 GN=Arhgef28 PE=1 SV=1	[K].IFPCLDELLETHR.[H]	1xCarbamidomethyl [C4]; 1xTMTpro [N-Term]	4.21444e-05	4.83621e-05	1	1	1	1	P97433 [890-902]	P97433 1xCarbamidomethyl [C893]	0	1947.03	1.141	0.0798312	0.402444	243.1	213.1	8.23	5.2	246.2	263	215.1	240.1	232.3	206.2	213.3	212.9		High	High	High	High	High	High	High	High	High	n/a	2.13e-05		1.736e-05		27		100
Q6P5U7	NACHT and WD repeat domain-containing protein 2 OS=Mus musculus OX=10090 GN=Nwd2 PE=1 SV=2	[K].TGHINPLVVYGGPCTGK.[T]	1xCarbamidomethyl [C14]; 1xTMTpro [K17]; 1xTMTpro [N-Term]	2.1268e-09	4.83621e-05	1	1	1	3	Q6P5U7 [406-422]	Q6P5U7 1xCarbamidomethyl [C419]	0	2378.31	0.952	0.421712	0.756015	1441.5	1514.4	6.62	7.68	1533.3	1442.4	1303.6	1440.5	1351	1457.5	1601.1	1573.5		High	High	High	High	High	High	High	High	High	n/a	2.13e-05		3.961e-11		59		100
P51863	V-type proton ATPase subunit d 1 OS=Mus musculus OX=10090 GN=Atp6v0d1 PE=1 SV=2	[K].LFPHCGRLYPEGLAQLAR.[A]	1xCarbamidomethyl [C5]; 1xTMTpro [N-Term]	1.80657e-07	4.83621e-05	1	1	1	7	P51863 [240-257]	P51863 1xCarbamidomethyl [C244]	1	2402.31	1.018	0.914884	0.976542	4540.3	4459.6	9.24	4.02	4752.5	4767	3901.4	4337.5	4610.7	4279.9	4318.7	4605		High	High	High	High	High	High	High	High	High	High	2.13e-05	0.0003185	2.841e-08	0.001374	44	4.1	100
O35969	Guanidinoacetate N-methyltransferase OS=Mus musculus OX=10090 GN=Gamt PE=1 SV=1	[K].TGGVLTYCNLTSWGELMK.[S]	1xCarbamidomethyl [C8]; 1xTMTpro [K18]; 1xTMTpro [N-Term]	2.60912e-08	4.83621e-05	1	1	1	2	O35969 [162-179]	O35969 1xCarbamidomethyl [C169]	0	2638.39	0.864	0.138736	0.496203	1371.9	1588.7	10.08	6.28	1408.7	1333.5	1639.1	1336	1462.2	1531.1	1648.6	1672.3		High	High	High	High	High	High	High	High	High	High	2.13e-05	0.0003185	1.044e-09	0.02458	58	2.06	100
P19096	Fatty acid synthase OS=Mus musculus OX=10090 GN=Fasn PE=1 SV=2	[K].TGGTYGEDLGADYNLSQVCDGK.[V]	1xCarbamidomethyl [C19]; 1xTMTpro [K22]; 1xTMTpro [N-Term]	4.45707e-10	4.83621e-05	1	1	1	1	P19096 [2443-2464]	P19096 1xCarbamidomethyl [C2461]	0	2928.42	0.916	0.845645	0.951946	677.2	739.7	20.72	6.04	702.8	607.6	945.4	652.5	672.9	736.4	743	779.3		High	High	High	High	High	High	High	High	High	n/a	2.13e-05		5.118e-12		76		100
Q9CQC8	Maspardin OS=Mus musculus OX=10090 GN=Spg21 PE=1 SV=1	[K].TGGNFPYLCR.[S]	1xCarbamidomethyl [C9]; 1xTMTpro [N-Term]	7.99178e-06	4.83621e-05	1	1	1	1	Q9CQC8 [252-261]	Q9CQC8 1xCarbamidomethyl [C260]	0	1488.76	0.891	0.398353	0.739165	1065.5	1196.5	13.73	4.56	1041.6	1038.2	1364.1	1090	1220.2	1272.1	1147.5	1173.2		High	High	High	High	High	High	High	High	High	n/a	2.13e-05		1.869e-06		36		100
P17439	Lysosomal acid glucosylceramidase OS=Mus musculus OX=10090 GN=Gba PE=1 SV=1	[R].LFPNTMLFASEACVGSK.[F]	1xCarbamidomethyl [C13]; 1xTMTpro [K17]; 1xTMTpro [N-Term]	5.91166e-08	4.83621e-05	1	1	1	1	P17439 [348-364]	P17439 1xCarbamidomethyl [C360]	0	2480.32	1.114	0.256341	0.626985	521	467.6	3.92	12.29	535.9	519.9	488.1	522	553.5	416.4	450.8	485.1		High	High	High	High	High	High	High	High	High	n/a	2.13e-05		3.034e-09		57		100
A2AF47	Dedicator of cytokinesis protein 11 OS=Mus musculus OX=10090 GN=Dock11 PE=1 SV=1	[K].LFPSGCSAFK.[K]	1xCarbamidomethyl [C6]; 1xTMTpro [K10]; 1xTMTpro [N-Term]	5.52093e-06	4.83621e-05	1	1	1	2	A2AF47 [1658-1667]	A2AF47 1xCarbamidomethyl [C1663]	0	1721.95	1.124	0.0955643	0.428683	990.5	881.1	7.13	6.48	913.1	972	1082.4	1009.3	991.7	864.2	881.6	880.6		High	High	High	High	High	High	High	High	High	n/a	2.13e-05		1.154e-06		36		100
P61979	Heterogeneous nuclear ribonucleoprotein K OS=Mus musculus OX=10090 GN=Hnrnpk PE=1 SV=1	[K].LFQECCPHSTDR.[V]	2xCarbamidomethyl [C5; C6]; 1xTMTpro [N-Term]	2.69964e-06	4.83621e-05	1	1	1	3	P61979 [180-191]	P61979 2xCarbamidomethyl [C184; C185]	0	1853.86	1.016	0.999174	0.999752	1538.5	1513.8	6.91	11.28	1446.1	1557.3	1702.1	1519.8	1407.1	1807.2	1467.5	1561.6		High	High	High	High	High	High	High	High	High	n/a	2.13e-05		4.495e-07		39		100
Q7TN33	CUGBP Elav-like family member 6 OS=Mus musculus OX=10090 GN=Celf6 PE=2 SV=1	[R].LFQPFGHIEECTVLR.[S]	1xCarbamidomethyl [C11]; 1xTMTpro [N-Term]	1.16302e-05	4.83621e-05	1	1	1	1	Q7TN33 [153-167]	Q7TN33 1xCarbamidomethyl [C163]	0	2150.14	1.074	0.640306	0.871984	175.5	163.4	8.09	15.29	175.2	194.3	159.5	175.8	204.1	151.6	176	147.9		High	High	High	High	High	High	High	High	High	n/a	2.13e-05		3.084e-06		58		100
A0A5F8MPH2	CUGBP, Elav-like family member 5 OS=Mus musculus OX=10090 GN=Celf5 PE=1 SV=1	[R].LFQPFGVIDECTVLR.[G]	1xCarbamidomethyl [C11]; 1xTMTpro [N-Term]	5.72451e-05	4.83621e-05	1	1	1	2	A0A5F8MPH2 [115-129]	A0A5F8MPH2 1xCarbamidomethyl [C125]	0	2098.13	0.953	0.267055	0.635969	1156.3	1213.5	11.82	9.16	1133.3	1256.2	943.1	1179.8	1124.4	1217.3	1394.1	1209.7		High	High	High	High	High	High	High	High	n/a	High		0.0003185		2.971e-05		4.48	100
Q5EG47	5'-AMP-activated protein kinase catalytic subunit alpha-1 OS=Mus musculus OX=10090 GN=Prkaa1 PE=1 SV=2	[R].LFQQILSGVDYCHR.[H]	1xCarbamidomethyl [C12]; 1xTMTpro [N-Term]	3.61943e-05	4.83621e-05	1	1	1	1	Q5EG47 [130-143]	Q5EG47 1xCarbamidomethyl [C141]	0	2040.07	1.068	0.335219	0.697581	584.1	546.8	6.61	7.32	598.6	642.3	552.9	570	621.9	532.3	555.7	538		High	High	High	High	High	High	High	High	High	n/a	2.13e-05		1.402e-05		23		100
Q6ZQ08	CCR4-NOT transcription complex subunit 1 OS=Mus musculus OX=10090 GN=Cnot1 PE=1 SV=2	[K].LFQSVAQCCMGQK.[Q]	2xCarbamidomethyl [C8; C9]; 1xTMTpro [K13]; 1xTMTpro [N-Term]	1.32611e-05	4.83621e-05	1	1	1	1	Q6ZQ08 [2351-2363]	Q6ZQ08 2xCarbamidomethyl [C2358; C2359]	0	2165.12	1.023	0.29373	0.66187	514.9	503.5	4.06	1.45	491.5	511.7	542.3	518.2	503.6	492.4	509.9	503.3		High	High	High	High	High	High	High	High	High	n/a	2.13e-05		3.668e-06		49		100
Q9WVQ1	Membrane-associated guanylate kinase, WW and PDZ domain-containing protein 2 OS=Mus musculus OX=10090 GN=Magi2 PE=1 SV=2	[K].LFQSVPIGQSVNLVLCR.[G]	1xCarbamidomethyl [C16]; 1xTMTpro [N-Term]	7.66189e-08	4.83621e-05	1	1	1	4	Q9WVQ1 [491-507]	Q9WVQ1 1xCarbamidomethyl [C506]	0	2234.27	0.979	0.731206	0.910021	1944.2	1985.4	11.07	15.48	1915.4	1973.4	2285.4	1762.5	1514	1926.1	2046.7	2212.6		High	High	High	High	High	High	High	High	High	n/a	2.13e-05		4.273e-09		59		100
Q9D404	3-oxoacyl-[acyl-carrier-protein] synthase, mitochondrial OS=Mus musculus OX=10090 GN=Oxsm PE=1 SV=1	[R].LFRDHACALAISSTK.[G]	1xCarbamidomethyl [C7]; 1xTMTpro [K15]; 1xTMTpro [N-Term]	5.82084e-06	4.83621e-05	1	1	1	1	Q9D404 [366-380]	Q9D404 1xCarbamidomethyl [C372]	1	2298.29	1.074	0.293872	0.661931	335.1	312.1	9.6	7.26	379.2	342.8	327.6	301.5	315.8	289.8	308.4	344.8		High	High	High	High	High	High	High	High	High	Low	2.13e-05	0.9682	1.236e-06	1	21	2.27	100
Q8BYB9	Protein O-glucosyltransferase 1 OS=Mus musculus OX=10090 GN=Poglut1 PE=1 SV=2	[R].LFREDDCMFPSR.[C]	1xCarbamidomethyl [C7]; 1xTMTpro [N-Term]	4.00652e-05	4.83621e-05	1	1	1	1	Q8BYB9 [96-107]	Q8BYB9 1xCarbamidomethyl [C102]	1	1876.9	0.932	0.218596	0.589358	480.7	516	15.04	10.63	497	528.7	367.2	464.9	606.4	512.3	519.7	473.4		High	High	High	High	High	High	High	High	High	n/a	2.13e-05		1.618e-05		23		100
O88342	WD repeat-containing protein 1 OS=Mus musculus OX=10090 GN=Wdr1 PE=1 SV=3	[K].TGEKVCALGESK.[A]	1xCarbamidomethyl [C6]; 2xTMTpro [K4; K12]; 1xTMTpro [N-Term]	4.03197e-05	4.83621e-05	1	1	1	1	O88342 [220-231]	O88342 1xCarbamidomethyl [C225]	1	2191.26	1.037	0.583395	0.846015	1199.3	1156.8	17.62	5.18	1280.5	1057.6	1554	1123.2	1127	1152.4	1161.2	1265.3		High	High	High	High	High	High	High	High	n/a	High		0.0003185		1.892e-05		2.22	100
A2AJA9	Apical junction component 1 homolog OS=Mus musculus OX=10090 GN=Ajm1 PE=1 SV=1	[R].TGRPFMCMIMAASEPR.[A]	1xCarbamidomethyl [C7]; 1xTMTpro [N-Term]	2.78319e-07	4.83621e-05	1	1	1	1	A2AJA9 [944-959]	A2AJA9 1xCarbamidomethyl [C950]	1	2159.06	0.895	0.108529	0.449215	857.5	958	13.14	6.48	867.1	848	657.2	891.1	870.9	934.1	1011.5	982.6		High	High	High	High	High	High	High	High	High	Low	2.13e-05	0.9488	2.304e-08	1	25	1.51	100
Q9Z2I0	Mitochondrial proton/calcium exchanger protein OS=Mus musculus OX=10090 GN=Letm1 PE=1 SV=1	[K].LFEDELTLDNLTRPQLVALCK.[L]	1xCarbamidomethyl [C20]; 1xTMTpro [K21]; 1xTMTpro [N-Term]	3.71808e-09	4.83621e-05	1	1	1	2	Q9Z2I0 [310-330]	Q9Z2I0 1xCarbamidomethyl [C329]	1	3096.73	1.035	0.851666	0.954183	3091.6	2986	12.42	2.18	3440.6	3028.9	2536.2	3155.6	2903.5	3056.1	2963.3	3008.8		High	High	High	High	High	High	High	High	High	n/a	2.13e-05		8.199e-11		43		100
Q60790	Ras GTPase-activating protein 3 OS=Mus musculus OX=10090 GN=Rasa3 PE=1 SV=2	[R].IFECQGLPIVNGQCDPYATVTLAGPFR.[S]	2xCarbamidomethyl [C4; C14]; 1xTMTpro [N-Term]	5.58781e-10	4.83621e-05	1	1	1	1	Q60790 [151-177]	Q60790 2xCarbamidomethyl [C154; C164]	0	3327.68	1.071	0.0259162	0.266043	352.8	329.4	3.31	3.31	333.9	357.7	358.9	348	334.9	327.4	310.6	331.5		High	High	High	High	High	High	High	High	High	n/a	2.13e-05		6.858e-12		89		100
Q6PB66	Leucine-rich PPR motif-containing protein, mitochondrial OS=Mus musculus OX=10090 GN=Lrpprc PE=1 SV=2	[K].LFECDRDQMYYNLLK.[L]	1xCarbamidomethyl [C4]; 1xTMTpro [K15]; 1xTMTpro [N-Term]	2.55982e-05	4.83621e-05	1	1	1	1	Q6PB66 [948-962]	Q6PB66 1xCarbamidomethyl [C951]	1	2616.34	0.938	0.083649	0.409771	1504.5	1604	4.41	4.09	1468.7	1541.2	1430.4	1575.8	1675.1	1583.1	1625.3	1520.4		High	High	High	High	High	High	High	High	n/a	High		0.0003185		0.003359		3.05	100
Q8BGH2	Sorting and assembly machinery component 50 homolog OS=Mus musculus OX=10090 GN=Samm50 PE=1 SV=1	[R].THFFLNAGNLCNLNYGEGPK.[A]	1xCarbamidomethyl [C11]; 1xTMTpro [K20]; 1xTMTpro [N-Term]	1.49034e-11	4.83621e-05	1	1	1	2	Q8BGH2 [393-412]	Q8BGH2 1xCarbamidomethyl [C403]	0	2874.49	1.001	0.797885	0.935914	1630.4	1628.3	14.09	4.48	1748.9	1475.3	1991	1520	1656.1	1566.8	1601	1735.2		High	High	High	High	High	High	High	High	High	n/a	2.13e-05		6.039e-14		90		100
Q9EQF6	Dihydropyrimidinase-related protein 5 OS=Mus musculus OX=10090 GN=Dpysl5 PE=1 SV=1	[R].THCPIYLVNVSSISAGDVIAAAK.[M]	1xCarbamidomethyl [C3]; 1xTMTpro [K23]; 1xTMTpro [N-Term]	1.7137e-11	4.83621e-05	1	1	1	6	Q9EQF6 [239-261]	Q9EQF6 1xCarbamidomethyl [C241]	0	2994.66	0.955	0.918799	0.977861	4420	4630.6	14.38	4.18	4567.3	4277.5	5672.7	4229.5	4374	4653.7	4607.5	4844.3		High	High	High	High	High	High	High	High	High	n/a	2.13e-05		7.223e-14		83		100
Q8BGH2	Sorting and assembly machinery component 50 homolog OS=Mus musculus OX=10090 GN=Samm50 PE=1 SV=1	[R].LELNYCIPMGVQGGDR.[I]	1xCarbamidomethyl [C6]; 1xTMTpro [N-Term]	2.1402e-06	4.83621e-05	1	1	1	2	Q8BGH2 [440-455]	Q8BGH2 1xCarbamidomethyl [C445]	0	2126.07	1.073	0.677351	0.889244	1380.8	1286.3	2.41	15.05	1374.5	1396.8	1387.2	1322.8	1619.9	1307.4	1149.4	1265.5		High	High	High	High	High	High	High	High	High	n/a	2.13e-05		3.309e-07		32		100
Q9CZV8	F-box/LRR-repeat protein 20 OS=Mus musculus OX=10090 GN=Fbxl20 PE=1 SV=3	[R].IELYDCQQITR.[A]	1xCarbamidomethyl [C6]; 1xTMTpro [N-Term]	2.3176e-06	4.83621e-05	1	1	1	2	Q9CZV8 [384-394]	Q9CZV8 1xCarbamidomethyl [C389]	0	1742.91	1.039	0.195853	0.566536	1272.6	1224.5	5.3	3.61	1254.5	1392.6	1240.9	1291	1294.6	1243.5	1196.2	1205.9		High	High	High	High	High	High	High	High	High	n/a	2.13e-05		3.682e-07		35		100
Q8K411	Presequence protease, mitochondrial OS=Mus musculus OX=10090 GN=Pitrm1 PE=1 SV=1	[K].THFVLPFPVNYIGECVR.[T]	1xCarbamidomethyl [C15]; 1xTMTpro [N-Term]	5.74438e-06	4.83621e-05	1	1	1	2	Q8K411 [854-870]	Q8K411 1xCarbamidomethyl [C868]	0	2352.25	1.052	0.335677	0.698158	1125.2	1070	1.26	10.2	1126.5	1132.1	1100	1124	1179.9	919.6	1050	1090.4		High	High	High	High	High	High	High	High	High	n/a	2.13e-05		1.213e-06		49		100
Q9R031	Xenotropic and polytropic retrovirus receptor 1 homolog OS=Mus musculus castaneus OX=10091 GN=Xpr1 PE=2 SV=1	[R].LENEHLNNCGEFR.[A]	1xCarbamidomethyl [C9]; 1xTMTpro [N-Term]	8.18869e-08	4.83621e-05	1	2	1	1	Q9R031 [607-619]	Q9R031 1xCarbamidomethyl [C615]	0	1935.93	1.036	0.787694	0.932101	464	447.8	10.19	12.33	439.3	473.7	549.3	454.5	555	455.4	428.3	440.2		High	High	High	High	High	High	High	High	High	Low	2.13e-05	0.8986	4.642e-09	1	68	1.57	100
Q3UHL1	CaM kinase-like vesicle-associated protein OS=Mus musculus OX=10090 GN=Camkv PE=1 SV=2	[K].LENGLIKEPCGTPEYLAPEVVGR.[Q]	1xCarbamidomethyl [C10]; 1xTMTpro [K7]; 1xTMTpro [N-Term]	8.60916e-10	4.83621e-05	1	1	1	2	Q3UHL1 [172-194]	Q3UHL1 1xCarbamidomethyl [C181]	1	3149.72	0.886	0.190251	0.560484	1462.2	1651	7.62	13.18	1644.9	1477.3	1378.1	1447.2	1536.4	1455.1	1937.8	1774.1		High	High	High	High	High	High	High	High	High	n/a	2.13e-05		1.206e-11		39		100
Q8K0S0	Phytanoyl-CoA hydroxylase-interacting protein OS=Mus musculus OX=10090 GN=Phyhip PE=1 SV=1	[R].THCGNVLQPYLK.[D]	1xCarbamidomethyl [C3]; 1xTMTpro [K12]; 1xTMTpro [N-Term]	5.89831e-06	4.83621e-05	1	1	1	7	Q8K0S0 [154-165]	Q8K0S0 1xCarbamidomethyl [C156]	0	2038.14	0.838	0.110171	0.45229	3359.2	4009.6	5.05	10.49	3688.8	3325	3327	3391.7	3306.5	3939.5	4236.5	4081		High	High	High	High	High	High	High	High	High	Medium	2.13e-05	0.03569	1.253e-06	0.3629	40	1.23	100
P61087	Ubiquitin-conjugating enzyme E2 K OS=Mus musculus OX=10090 GN=Ube2k PE=1 SV=3	[K].IENLCAMGFDR.[N]	1xCarbamidomethyl [C5]; 1xTMTpro [N-Term]	5.44792e-05	4.83621e-05	1	1	1	2	P61087 [166-176]	P61087 1xCarbamidomethyl [C170]	0	1629.8	0.874	0.57694	0.843757	1238.5	1417.5	19.82	10.96	1187.9	1262.3	1755.4	1215.1	1627.6	1473.7	1261.4	1363.4		High	High	High	High	High	High	High	High	High	n/a	2.13e-05		2.466e-05		20		100
Q99PU5	Long-chain-fatty-acid--CoA ligase ACSBG1 OS=Mus musculus OX=10090 GN=Acsbg1 PE=1 SV=1	[R].LEPFCTQRPYTVHQMFYEALDK.[Y]	1xCarbamidomethyl [C5]; 1xTMTpro [K22]; 1xTMTpro [N-Term]	2.98548e-09	4.83621e-05	1	1	1	2	Q99PU5 [91-112]	Q99PU5 1xCarbamidomethyl [C95]	1	3381.73	1.054	0.20039	0.572112	1353.6	1284.1	3.52	5.76	1437.6	1326.8	1353.5	1353.6	1235.3	1410.7	1285	1283.2		High	High	High	High	High	High	High	High	High	High	2.13e-05	0.001205	6.158e-11	0.05311	24	2.81	100
P70232	Neural cell adhesion molecule L1-like protein OS=Mus musculus OX=10090 GN=Chl1 PE=1 SV=2	[K].IEPIDVEEGDSIVLPCNPPK.[G]	1xCarbamidomethyl [C16]; 1xTMTpro [K20]; 1xTMTpro [N-Term]	1.71614e-08	4.83621e-05	1	1	1	2	P70232 [138-157]	P70232 1xCarbamidomethyl [C153]	0	2829.52	1.007	0.451053	0.772436	713.6	708.8	2.14	5.63	720.6	703.2	736.8	706.6	698.5	719.2	735.1	644.8		High	High	High	High	High	High	High	High	High	n/a	2.13e-05		6.034e-10		44		100
Q8BH44	Coronin-2B OS=Mus musculus OX=10090 GN=Coro2b PE=1 SV=2	[R].IEPNYPKVCGHQGNVLDIK.[W]	1xCarbamidomethyl [C9]; 2xTMTpro [K7; K19]; 1xTMTpro [N-Term]	1.30028e-05	4.83621e-05	1	1	1	1	Q8BH44 [76-94]	Q8BH44 1xCarbamidomethyl [C84]	1	3093.73	0.825	0.194093	0.564919	1904.8	2309.5	18.85	9.91	2543.3	1687.1	2011.5	1803.6	2119	2145.3	2486.3	2568.3		High	High	High	High	High	High	High	High	High	n/a	2.13e-05		3.546e-06		18		100
Q08331	Calretinin OS=Mus musculus OX=10090 GN=Calb2 PE=1 SV=3	[K].IEMAELAQILPTEENFLLCFR.[Q]	1xCarbamidomethyl [C19]; 1xTMTpro [N-Term]	9.24639e-09	4.83621e-05	1	1	1	4	Q08331 [83-103]	Q08331 1xCarbamidomethyl [C101]	0	2841.48	0.838	0.452369	0.773312	1969.2	2349.9	17.67	27.17	2082.6	1862	2515.8	1681.7	3033.4	2781.7	1674	1985.1		High	High	High	High	High	High	High	High	High	n/a	2.13e-05		2.694e-10		58		100
Q9D8X1	Copper homeostasis protein cutC homolog OS=Mus musculus OX=10090 GN=Cutc PE=1 SV=1	[R].IELCSGLLEGGTTPSMGVLQVVK.[Q]	1xCarbamidomethyl [C4]; 1xTMTpro [K23]; 1xTMTpro [N-Term]	9.7856e-11	4.83621e-05	1	1	1	3	Q9D8X1 [48-70]	Q9D8X1 1xCarbamidomethyl [C51]	0	2996.67	1.111	0.0865267	0.414341	2222.7	2000.2	15.51	9.89	2272.4	2174	2928.5	2147.8	1708.2	2059.9	1942.1	2160.5		High	High	High	High	High	High	High	High	High	n/a	2.13e-05		7.033e-13		92		100
O08529	Calpain-2 catalytic subunit OS=Mus musculus OX=10090 GN=Capn2 PE=1 SV=4	[R].LEICNLTPDTLTCDSYK.[K]	2xCarbamidomethyl [C4; C13]; 1xTMTpro [K17]; 1xTMTpro [N-Term]	4.93369e-06	4.83621e-05	1	1	1	1	O08529 [338-354]	O08529 2xCarbamidomethyl [C341; C350]	0	2651.36	1.036	0.391664	0.734722	890.2	859.1	6.64	3.52	904.2	835.9	977.5	876.5	842.5	875.9	841.8	905.5		High	High	High	High	High	High	High	High	High	n/a	2.13e-05		9.881e-07		52		100
Q9QXL2	Kinesin-like protein KIF21A OS=Mus musculus OX=10090 GN=Kif21a PE=1 SV=2	[K].IEGCHICTSVTPGEPQVFLGK.[D]	2xCarbamidomethyl [C4; C7]; 1xTMTpro [K21]; 1xTMTpro [N-Term]	5.05733e-10	4.83621e-05	1	1	1	1	Q9QXL2 [25-45]	Q9QXL2 2xCarbamidomethyl [C28; C31]	0	2937.55	0.951	0.428388	0.760198	1208.3	1270.7	6.22	7.34	1310	1125.8	1210.1	1206.5	1209	1163.1	1335.5	1350.7		High	High	High	High	High	High	High	High	High	n/a	2.13e-05		6.016e-12		60		100
P47962	60S ribosomal protein L5 OS=Mus musculus OX=10090 GN=Rpl5 PE=1 SV=3	[R].IEGDMIVCAAYAHELPK.[Y]	1xCarbamidomethyl [C8]; 1xTMTpro [K17]; 1xTMTpro [N-Term]	3.39936e-11	4.83621e-05	1	1	1	3	P47962 [69-85]	P47962 1xCarbamidomethyl [C76]	0	2525.34	0.947	0.990037	0.997258	2755.1	2908.1	21.85	2.59	2731.4	2507.7	3959.7	2778.9	3057.1	2909.1	2899.3	2907		High	High	High	High	High	High	High	High	High	n/a	2.13e-05		1.774e-13		66		100
Q91YR5	eEF1A lysine and N-terminal methyltransferase OS=Mus musculus OX=10090 GN=Mettl13 PE=1 SV=1	[R].IEGEVNEILFCQLHPEQK.[L]	1xCarbamidomethyl [C11]; 1xTMTpro [K18]; 1xTMTpro [N-Term]	2.82045e-07	4.83621e-05	1	1	1	2	Q91YR5 [641-658]	Q91YR5 1xCarbamidomethyl [C651]	0	2791.49	0.906	0.106009	0.443579	1150.1	1269.4	7.2	3.62	1181.2	1119.7	1274.1	1082.2	1260.2	1198	1278.7	1305.2		High	High	High	High	High	High	High	High	High	n/a	2.13e-05		2.337e-08		41		100
Q8BGT8	Phytanoyl-CoA hydroxylase-interacting protein-like OS=Mus musculus OX=10090 GN=Phyhipl PE=1 SV=1	[K].LEGIFFSCSTEFNTGKPPQDSPYGR.[Y]	1xCarbamidomethyl [C8]; 1xTMTpro [K16]; 1xTMTpro [N-Term]	1.37843e-12	4.83621e-05	1	1	1	4	Q8BGT8 [224-248]	Q8BGT8 1xCarbamidomethyl [C231]	1	3442.72	0.895	0.91297	0.976053	4666	5216.2	26.17	7.6	4478.8	4354.1	7274	4861	5691.7	5217.4	4721.2	5215		High	High	High	High	High	High	High	High	High	n/a	2.13e-05		2.682e-15		59		100
Q9QXZ0	Microtubule-actin cross-linking factor 1, isoforms 1/2/3/4 OS=Mus musculus OX=10090 GN=Macf1 PE=1 SV=2	[K].LEGIGQFHCR.[V]	1xCarbamidomethyl [C9]; 1xTMTpro [N-Term]	2.41518e-05	4.83621e-05	1	1	1	1	Q9QXZ0 [5082-5091]	Q9QXZ0 1xCarbamidomethyl [C5090]	0	1520.8	1.044	0.238392	0.608317	225.9	216.4	3.34	5.74	219.1	225.8	237.3	226.1	203.1	233.6	216.6	216.1		High	High	High	High	High	High	High	High	High	n/a	2.13e-05		8.109e-06		40		100
Q9QZX7	Serine racemase OS=Mus musculus OX=10090 GN=Srr PE=1 SV=1	[K].LEGIPAYIVVPQTAPNCK.[K]	1xCarbamidomethyl [C17]; 1xTMTpro [K18]; 1xTMTpro [N-Term]	1.48975e-07	4.83621e-05	1	1	1	5	Q9QZX7 [97-114]	Q9QZX7 1xCarbamidomethyl [C113]	0	2578.46	0.853	0.260983	0.630831	2756.3	3232.5	4.99	16.66	3024.4	2747.5	2723.5	2765.1	2581.5	2942.2	3729.5	3551.3		High	High	High	High	High	High	High	High	High	n/a	2.13e-05		1.015e-08		54		100
Q9QZX7	Serine racemase OS=Mus musculus OX=10090 GN=Srr PE=1 SV=1	[K].LEGIPAYIVVPQTAPNCKK.[L]	1xCarbamidomethyl [C17]; 2xTMTpro [K18; K19]; 1xTMTpro [N-Term]	1.64572e-05	4.83621e-05	1	1	1	1	Q9QZX7 [97-115]	Q9QZX7 1xCarbamidomethyl [C113]	1	3010.76	0.942	0.720318	0.906135	855.3	908.2	8.73	13.56	975.4	798	873.2	837.8	761.3	841	1025.3	980.8		High	High	High	High	High	High	High	High	High	Low	2.13e-05	0.951	4.868e-06	1	26	0.95	100
Q80T79	CUB and sushi domain-containing protein 3 OS=Mus musculus OX=10090 GN=Csmd3 PE=1 SV=3	[R].LEGSSEIICLGGGR.[R]	1xCarbamidomethyl [C9]; 1xTMTpro [N-Term]	7.0585e-07	4.83621e-05	1	1	1	1	Q80T79 [1214-1227]	Q80T79 1xCarbamidomethyl [C1222]	0	1751.93	1.177	0.00888508	0.18291	647	549.7	5.27	3.95	585	655.2	639	655.6	534.4	548.6	586	550.8		High	High	High	High	High	High	High	High	High	n/a	2.13e-05		7.797e-08		57		100
Q80T79	CUB and sushi domain-containing protein 3 OS=Mus musculus OX=10090 GN=Csmd3 PE=1 SV=3	[R].LEGSSEIICLGGGRR.[V]	1xCarbamidomethyl [C9]; 1xTMTpro [N-Term]	1.36263e-06	4.83621e-05	1	1	1	1	Q80T79 [1214-1228]	Q80T79 1xCarbamidomethyl [C1222]	1	1908.03	1.141	0.00719982	0.170205	920.1	806.7	4.9	3.89	876.8	977.1	897.3	943.5	824.5	785.8	852.4	789.2		High	High	High	High	High	High	High	High	High	Low	2.13e-05	0.9689	1.843e-07	1	24	1.39	100
Q6R891	Neurabin-2 OS=Mus musculus OX=10090 GN=Ppp1r9b PE=1 SV=1	[K].LEGYWGEAQSLCQAVDEHLR.[E]	1xCarbamidomethyl [C12]; 1xTMTpro [N-Term]	2.58365e-10	4.83621e-05	1	1	1	3	Q6R891 [723-742]	Q6R891 1xCarbamidomethyl [C734]	0	2665.3	0.98	0.285965	0.654439	877.4	895.6	3.87	2.81	859.6	914.6	839.7	895.5	880.5	886.9	937.1	904.3		High	High	High	High	High	High	High	High	High	n/a	2.13e-05		2.507e-12		108		100
Q6R891	Neurabin-2 OS=Mus musculus OX=10090 GN=Ppp1r9b PE=1 SV=1	[K].LEGYWGEAQSLCQAVDEHLRETQAQYQALER.[K]	1xCarbamidomethyl [C12]; 1xTMTpro [N-Term]	8.18869e-08	4.83621e-05	1	1	1	1	Q6R891 [723-753]	Q6R891 1xCarbamidomethyl [C734]	1	3982.93	0.921	0.0403522	0.311653	401.9	436.3	4.17	5.67	409.1	412.3	375.9	394.9	419.2	413.7	454.1	463.4		High	High	High	High	High	High	High	High	High	n/a	2.13e-05		4.651e-09		20		100
Q6VNS1	NT-3 growth factor receptor OS=Mus musculus OX=10090 GN=Ntrk3 PE=1 SV=1	[R].LEHCIEFVVR.[G]	1xCarbamidomethyl [C4]; 1xTMTpro [N-Term]	2.86569e-06	4.83621e-05	1	1	1	2	Q6VNS1 [317-326]	Q6VNS1 1xCarbamidomethyl [C320]	0	1605.87	0.932	0.160091	0.521846	708.4	760	7.84	3.14	692.6	724.6	623	749.1	760.8	714.7	764.8	759.2		High	High	High	High	High	High	High	High	High	n/a	2.13e-05		4.858e-07		40		100
Q8K0D0; Q04899	Cyclin-dependent kinase 17 OS=Mus musculus OX=10090 GN=Cdk17 PE=1 SV=2 Cyclin-dependent kinase 18 OS=Mus musculus OX=10090 GN=Cdk18 PE=1 SV=1	[R].LEHEEGAPCTAIR.[E]	1xCarbamidomethyl [C9]; 1xTMTpro [N-Term]	1.39392e-07	4.83621e-05	2	3	1	2	Q8K0D0 [225-237]; Q04899 [154-166]	Q8K0D0 1xCarbamidomethyl [C233]; Q04899 1xCarbamidomethyl [C162]	0	1786.91	0.926	0.130406	0.483097	523.5	565.3	9.64	4.98	523.8	572.3	451.2	523.1	609	551.8	579.1	547.3	Shared	High	High	High	High	High	High	High	High	High	Low	2.13e-05	0.5042	9.325e-09	0.9188	76	1.21	100
O08553	Dihydropyrimidinase-related protein 2 OS=Mus musculus OX=10090 GN=Dpysl2 PE=1 SV=2	[K].THNSALEYNIFEGMECR.[G]	1xCarbamidomethyl [C16]; 1xTMTpro [N-Term]	8.5521e-10	4.83621e-05	1	1	1	7	O08553 [424-440]	O08553 1xCarbamidomethyl [C439]	0	2375.11	1.072	0.0821034	0.407414	4428.4	4131.7	4.77	3.97	4607.3	4609	4256.5	4229.3	3968.3	4069.8	4194.7	4349.4		High	High	High	High	High	High	High	High	High	n/a	2.13e-05		1.199e-11		50		100
Q99J21	Mucolipin-1 OS=Mus musculus OX=10090 GN=Mcoln1 PE=1 SV=1	[K].THIQECK.[H]	1xCarbamidomethyl [C6]; 1xTMTpro [K7]; 1xTMTpro [N-Term]	6.20141e-05	4.83621e-05	1	1	1	2	Q99J21 [279-285]	Q99J21 1xCarbamidomethyl [C284]	0	1523.85	0.92	0.252127	0.623019	1099.3	1194.6	8.76	8.15	1207	975.2	1117.3	1081.5	1285	1054.9	1214.2	1175.3		High	High	High	High	High	High	High	High	High	Low	2.13e-05	0.9689	2.954e-05	1	31	1.16	100
Q6A009	E3 ubiquitin-protein ligase listerin OS=Mus musculus OX=10090 GN=Ltn1 PE=1 SV=3	[R].THLPDFLICK.[L]	1xCarbamidomethyl [C9]; 1xTMTpro [K10]; 1xTMTpro [N-Term]	1.37929e-05	4.83621e-05	1	1	1	1	Q6A009 [860-869]	Q6A009 1xCarbamidomethyl [C868]	0	1852.06	1.007	0.598433	0.853573	970.4	963.5	3.59	2.95	1023.3	944.1	984.4	956.6	999.3	931.4	971	956		High	High	High	High	High	High	High	High	High	n/a	2.13e-05		3.834e-06		50		100
A2ALS5	Rap1 GTPase-activating protein 1 OS=Mus musculus OX=10090 GN=Rap1gap PE=1 SV=2	[R].THHDVIPISCLTEFPNVVQMAK.[L]	1xCarbamidomethyl [C10]; 1xTMTpro [K22]; 1xTMTpro [N-Term]	4.04799e-12	4.83621e-05	1	1	1	2	A2ALS5 [137-158]	A2ALS5 1xCarbamidomethyl [C146]	0	3144.68	0.996	0.727004	0.908557	1059.7	1064.1	6.9	5.42	1138.5	1075.7	963.4	1043.9	1009.2	1060.7	1149.8	1067.5		High	High	High	High	High	High	High	High	High	n/a	2.13e-05		1.095e-14		67		100
Q9D379	Epoxide hydrolase 1 OS=Mus musculus OX=10090 GN=Ephx1 PE=1 SV=2	[K].THGLSDEHVFEVICPSIPGYGFSEASSK.[K]	1xCarbamidomethyl [C14]; 1xTMTpro [K28]; 1xTMTpro [N-Term]	9.10793e-08	4.83621e-05	1	1	1	1	Q9D379 [169-196]	Q9D379 1xCarbamidomethyl [C182]	0	3658.83	1.128	0.0336457	0.291506	976	864.9	8.36	5.64	1017.8	935.8	1108.4	931.3	814	915.2	833.7	897.3		High	High	High	High	High	High	High	High	High	n/a	2.13e-05		5.363e-09		43		100
Q99LY9	NADH dehydrogenase [ubiquinone] iron-sulfur protein 5 OS=Mus musculus OX=10090 GN=Ndufs5 PE=1 SV=3	[K].IEFDDFEECLLR.[Y]	1xCarbamidomethyl [C9]; 1xTMTpro [N-Term]	3.77883e-07	4.83621e-05	1	1	1	5	Q99LY9 [58-69]	Q99LY9 1xCarbamidomethyl [C66]	0	1889.93	1.064	0.849452	0.953635	4294.5	4034.7	9.17	5.69	4263.8	4325.5	3579	4401	4390.7	3887.1	4147.8	3924.6		High	High	High	High	High	High	High	High	High	n/a	2.13e-05		3.444e-08		27		100
Q9Z1K5	E3 ubiquitin-protein ligase ARIH1 OS=Mus musculus OX=10090 GN=Arih1 PE=1 SV=3	[K].LFAECHVINPSK.[K]	1xCarbamidomethyl [C5]; 1xTMTpro [K12]; 1xTMTpro [N-Term]	8.16972e-07	4.83621e-05	1	1	1	2	Q9Z1K5 [155-166]	Q9Z1K5 1xCarbamidomethyl [C159]	0	2023.13	0.906	0.371141	0.722261	985.6	1088.3	4.1	9.07	993.7	977.4	1059.7	969.5	918.1	1128	1064	1113.1		High	High	High	High	High	High	High	High	High	Low	2.13e-05	0.05256	9.4e-08	0.421	37	2.04	100
Q6NT99	Dual specificity protein phosphatase 23 OS=Mus musculus OX=10090 GN=Dusp23 PE=1 SV=1	[R].TGTMLACYLVK.[E]	1xCarbamidomethyl [C7]; 1xTMTpro [K11]; 1xTMTpro [N-Term]	1.68526e-06	4.83621e-05	1	1	1	2	Q6NT99 [102-112]	Q6NT99 1xCarbamidomethyl [C108]	0	1865.05	0.997	0.405661	0.745407	1381.5	1386.2	6.57	2.91	1364.6	1385.1	1561.9	1377.8	1318.2	1391.4	1410.7	1381		High	High	High	High	High	High	High	High	High	n/a	2.13e-05		2.421e-07		37		100
P47857	ATP-dependent 6-phosphofructokinase, muscle type OS=Mus musculus OX=10090 GN=Pfkm PE=1 SV=3	[R].IFANTPDSGCVLGMR.[K]	1xCarbamidomethyl [C10]; 1xTMTpro [N-Term]	3.137e-07	4.83621e-05	1	1	1	9	P47857 [700-714]	P47857 1xCarbamidomethyl [C709]	0	1941.98	1.001	0.686717	0.892966	6399.7	6391.7	4.37	15.47	6363	6436.6	6695.8	6019.4	8105.5	6541.1	5710.6	6245.6		High	High	High	High	High	High	High	High	High	Low	2.13e-05	0.9495	2.685e-08	1	53	0.85	100
P47857	ATP-dependent 6-phosphofructokinase, muscle type OS=Mus musculus OX=10090 GN=Pfkm PE=1 SV=3	[R].IFANTPDSGCVLGMRKR.[A]	1xCarbamidomethyl [C10]; 1xTMTpro [K16]; 1xTMTpro [N-Term]	8.48036e-06	4.83621e-05	1	1	1	1	P47857 [700-716]	P47857 1xCarbamidomethyl [C709]	2	2530.39	0.907	0.178975	0.545974	341.3	376.3	7.44	5.14	338	344.7	390.5	334.1	399.8	372.4	353	380.2		High	High	High	High	High	High	High	High	High	n/a	2.13e-05		2.031e-06		21		100
Q0VEJ0	Centrosomal protein of 76 kDa OS=Mus musculus OX=10090 GN=Cep76 PE=1 SV=1	[K].IFAQDENGINRPVCSYVK.[P]	1xCarbamidomethyl [C14]; 1xTMTpro [K18]; 1xTMTpro [N-Term]	6.5433e-09	4.83621e-05	1	1	1	1	Q0VEJ0 [308-325]	Q0VEJ0 1xCarbamidomethyl [C321]	1	2718.45	1.521	0.583615	0.846194	2496	1641.1	9.52	64.03	2670.8	2402.8	2146.3	2592.7	1726	4587.4	1495.9	1560.4		High	High	High	High	High	High	High	High	High	n/a	2.13e-05		1.713e-10		34		100
P63087; P62137; P62141	Serine/threonine-protein phosphatase PP1-gamma catalytic subunit OS=Mus musculus OX=10090 GN=Ppp1cc PE=1 SV=1 Serine/threonine-protein phosphatase PP1-alpha catalytic subunit OS=Mus musculus OX=10090 GN=Ppp1ca PE=1 SV=1 Serine/threonine-protein phosphatase PP1-beta catalytic subunit OS=Mus musculus OX=10090 GN=Ppp1cb PE=1 SV=3	[K].IFCCHGGLSPDLQSMEQIR.[R]	2xCarbamidomethyl [C3; C4]; 1xTMTpro [N-Term]	1.09568e-10	4.83621e-05	3	3	1	3	P63087 [169-187]; P62137 [169-187]; P62141 [168-186]	P63087 2xCarbamidomethyl [C171; C172]; P62137 2xCarbamidomethyl [C171; C172]; P62141 2xCarbamidomethyl [C170; C171]	0	2552.24	1.052	0.234703	0.605493	1313.3	1248.2	4.77	7.28	1247.4	1397.5	1329	1297.9	1192.6	1334.1	1144.2	1306.4	Shared	High	High	High	High	High	High	High	High	High	n/a	2.13e-05		8.193e-13		80		100
Q8C7R4	Ubiquitin-like modifier-activating enzyme 6 OS=Mus musculus OX=10090 GN=Uba6 PE=1 SV=1	[R].LFCDFGDEFEVSDTTGEEPK.[E]	1xCarbamidomethyl [C3]; 1xTMTpro [K20]; 1xTMTpro [N-Term]	1.2956e-07	4.83621e-05	1	1	1	1	Q8C7R4 [195-214]	Q8C7R4 1xCarbamidomethyl [C197]	0	2930.39	0.837	0.199354	0.571297	495.2	591.7	12.51	11.95	507.1	474	615.3	483.6	508.6	549.4	655.6	637.3		High	High	High	High	High	High	High	High	High	n/a	2.13e-05		8.452e-09		43		100
O55143	Sarcoplasmic/endoplasmic reticulum calcium ATPase 2 OS=Mus musculus OX=10090 GN=Atp2a2 PE=1 SV=2	[K].TGTLTTNQMSVCRMFILDK.[V]	1xCarbamidomethyl [C12]; 1xTMTpro [K19]; 1xTMTpro [N-Term]	1.61349e-07	4.83621e-05	1	1	1	1	O55143 [353-371]	O55143 1xCarbamidomethyl [C364]	1	2824.5	0.902	0.126931	0.47743	1192.6	1322	11.58	1.72	1193.2	1003.2	1336.7	1192	1363.1	1312.7	1317.3	1326.8		High	High	High	High	High	High	High	High	High	n/a	2.13e-05		1.125e-08		42		100
Q8BY87	Ubiquitin carboxyl-terminal hydrolase 47 OS=Mus musculus OX=10090 GN=Usp47 PE=1 SV=2	[K].LFCLHPVK.[Q]	1xCarbamidomethyl [C3]; 1xTMTpro [K8]; 1xTMTpro [N-Term]	2.98762e-05	4.83621e-05	1	1	1	1	Q8BY87 [611-618]	Q8BY87 1xCarbamidomethyl [C613]	0	1621.97	0.853	0.0925381	0.423457	683.6	801.8	10.89	6.34	666.7	641.8	815.8	701	788.2	860	738.8	815.7		High	High	High	High	High	High	High	High	High	n/a	2.13e-05		1.085e-05		35		100
Q64518; O55143	Sarcoplasmic/endoplasmic reticulum calcium ATPase 3 OS=Mus musculus OX=10090 GN=Atp2a3 PE=1 SV=4 Sarcoplasmic/endoplasmic reticulum calcium ATPase 2 OS=Mus musculus OX=10090 GN=Atp2a2 PE=1 SV=2	[K].TGTLTTNQMSVCR.[M]	1xCarbamidomethyl [C12]; 1xTMTpro [N-Term]	1.27232e-08	4.83621e-05	2	2	1	5	Q64518 [353-365]; O55143 [353-365]	Q64518 1xCarbamidomethyl [C364]; O55143 1xCarbamidomethyl [C364]	0	1772.9	0.85	0.193113	0.563638	7273.8	8562.2	16.49	8.05	6914	6799.2	9556.5	7652.2	8192.9	9798	8671.3	8454.4	Shared	High	High	High	High	High	High	High	High	High	n/a	2.13e-05		4.091e-10		62		100
Q9D7X1	BTB/POZ domain-containing protein KCTD4 OS=Mus musculus OX=10090 GN=Kctd4 PE=1 SV=1	[R].IFCNAPDFISK.[I]	1xCarbamidomethyl [C3]; 1xTMTpro [K11]; 1xTMTpro [N-Term]	1.85073e-05	4.83621e-05	1	1	1	1	Q9D7X1 [157-167]	Q9D7X1 1xCarbamidomethyl [C159]	0	1920.05	1.037	0.546932	0.827889	433.6	418	13.87	13.02	516.3	454.4	373.5	413.7	429.7	343.6	406.7	472.5		High	High	High	High	High	High	High	High	High	n/a	2.13e-05		5.683e-06		52		100
P50544	Very long-chain specific acyl-CoA dehydrogenase, mitochondrial OS=Mus musculus OX=10090 GN=Acadvl PE=1 SV=3	[K].IFCSEAAWK.[V]	1xCarbamidomethyl [C3]; 1xTMTpro [K9]; 1xTMTpro [N-Term]	1.7567e-05	4.83621e-05	1	1	1	2	P50544 [421-429]	P50544 1xCarbamidomethyl [C423]	0	1719.94	1.196	0.010476	0.190848	2502.8	2092	4.54	7.92	2697.6	2429.6	2495.1	2510.4	2321.5	2142.1	1927.2	2043		High	High	High	High	High	High	High	High	High	High	2.13e-05	0.0003185	5.313e-06	0.006901	49	3.56	100
P13707	Glycerol-3-phosphate dehydrogenase [NAD(+)], cytoplasmic OS=Mus musculus OX=10090 GN=Gpd1 PE=1 SV=3	[K].LFCSGTVSSATFLESCGVADLITTCYGGR.[N]	3xCarbamidomethyl [C3; C16; C25]; 1xTMTpro [N-Term]	1.98997e-09	4.83621e-05	1	1	1	1	P13707 [241-269]	P13707 3xCarbamidomethyl [C243; C256; C265]	0	3433.64	1.059	0.101528	0.436719	361.1	341.1	5.96	1.08	346	396.9	357.6	364.7	341.9	340.2	338.3	346.9		High	High	High	High	High	High	High	High	High	Low	2.13e-05	0.9689	3.612e-11	1	85	3.38	100
Q60967	Bifunctional 3'-phosphoadenosine 5'-phosphosulfate synthase 1 OS=Mus musculus OX=10090 GN=Papss1 PE=1 SV=1	[K].LFADAGLVCITSFISPYTQDR.[N]	1xCarbamidomethyl [C9]; 1xTMTpro [N-Term]	1.4341e-08	4.83621e-05	1	1	1	1	Q60967 [119-139]	Q60967 1xCarbamidomethyl [C127]	0	2678.38	0.988	0.663157	0.882815	341.7	345.9	4.15	3.79	322.1	343.1	356.5	340.3	359.5	328.4	342.3	349.4		High	High	High	High	High	High	High	High	High	n/a	2.13e-05		4.787e-10		56		100
P13597	Intercellular adhesion molecule 1 OS=Mus musculus OX=10090 GN=Icam1 PE=1 SV=1	[K].LFCSLEGLFPASEAR.[I]	1xCarbamidomethyl [C3]; 1xTMTpro [N-Term]	6.64329e-06	4.83621e-05	1	1	1	1	P13597 [237-251]	P13597 1xCarbamidomethyl [C239]	0	2001.04	1	0.692586	0.89532	482.9	482.9	4.84	3.33	459.7	516.8	483.2	482.6	458.7	475.1	493.2	490.8		High	High	High	High	High	High	High	High	High	Low	2.13e-05	0.9556	1.473e-06	1	41	1.56	100
P97470	Serine/threonine-protein phosphatase 4 catalytic subunit OS=Mus musculus OX=10090 GN=Ppp4c PE=1 SV=2	[K].IFCVHGGLSPSIQTLDQIR.[T]	1xCarbamidomethyl [C3]; 1xTMTpro [N-Term]	1.30475e-11	4.83621e-05	1	1	1	2	P97470 [160-178]	P97470 1xCarbamidomethyl [C162]	0	2445.32	0.856	0.413492	0.751196	1881.5	2196.9	18.74	10.7	2027.8	1745.9	2481.3	1658	1875	2059.5	2343.3	2346.4		High	High	High	High	High	High	High	High	High	Low	2.13e-05	0.8679	5.087e-14	1	84	2.7	100
P18052	Receptor-type tyrosine-protein phosphatase alpha OS=Mus musculus OX=10090 GN=Ptpra PE=1 SV=3	[R].TGTFCALSTVLER.[V]	1xCarbamidomethyl [C5]; 1xTMTpro [N-Term]	1.37028e-05	4.83621e-05	1	1	1	1	P18052 [766-778]	P18052 1xCarbamidomethyl [C770]	0	1758.94	0.958	0.968209	0.99067	212.7	222	11.15	3.86	219.1	259	206.5	206.6	214.6	215.5	231	228.7		High	High	High	High	High	High	High	High	High	n/a	2.13e-05		3.825e-06		54		100
Q5FWH2	Putative E3 ubiquitin-protein ligase UNKL OS=Mus musculus OX=10090 GN=Unkl PE=2 SV=2	[K].TGTCIHETDAR.[G]	1xCarbamidomethyl [C4]; 1xTMTpro [N-Term]	1.28334e-05	4.83621e-05	1	1	1	1	Q5FWH2 [118-128]	Q5FWH2 1xCarbamidomethyl [C121]	0	1564.77	1.304	0.452406	0.773312	887.1	680.1	11.71	31.3	886.3	964.4	723.7	887.9	1145.3	623.3	646.2	715.8		High	High	High	High	High	High	High	High	High	n/a	2.13e-05		3.492e-06		39		100
Q60996	Serine/threonine-protein phosphatase 2A 56 kDa regulatory subunit gamma isoform OS=Mus musculus OX=10090 GN=Ppp2r5c PE=1 SV=2	[K].LFDDCTQQFK.[A]	1xCarbamidomethyl [C5]; 1xTMTpro [K10]; 1xTMTpro [N-Term]	1.92447e-05	4.83621e-05	1	1	1	1	Q60996 [404-413]	Q60996 1xCarbamidomethyl [C408]	0	1910	0.877	0.610545	0.858333	900.9	1026.9	11.53	12.61	909.2	820.9	1073.1	892.6	787.1	1028.3	1025.6	1040.7		High	High	High	High	High	High	High	High	High	n/a	8.736e-05		0.002576		31		100
P62858	40S ribosomal protein S28 OS=Mus musculus OX=10090 GN=Rps28 PE=1 SV=1	[R].TGSQGQCTQVR.[V]	1xCarbamidomethyl [C7]; 1xTMTpro [N-Term]	6.38876e-07	4.83621e-05	1	1	1	2	P62858 [21-31]	P62858 1xCarbamidomethyl [C27]	0	1525.77	1.106	0.476352	0.78706	1210.1	1094.4	13.09	9.72	1226.3	1194.1	925.9	1249.5	925.9	1090.3	1173	1098.4		High	High	High	High	High	High	High	High	High	Low	2.13e-05	0.713	6.813e-08	1	53	0.93	100
O88704	Potassium/sodium hyperpolarization-activated cyclic nucleotide-gated channel 1 OS=Mus musculus OX=10090 GN=Hcn1 PE=1 SV=1	[K].IFDEENILSELNDPLREEIVNFNCR.[K]	1xCarbamidomethyl [C24]; 1xTMTpro [N-Term]	1.4341e-08	4.83621e-05	1	1	1	1	O88704 [432-456]	O88704 1xCarbamidomethyl [C455]	1	3382.69	0.751	0.0234847	0.25708	954	1270.1	16.33	5.5	1054.8	955	703.8	953	1302.2	1238.8	1224.9	1379.7		High	High	High	High	High	High	High	High	High	n/a	2.13e-05		4.789e-10		52		100
P58544	BTB/POZ domain-containing protein 1 OS=Mus musculus OX=10090 GN=Btbd1 PE=1 SV=3	[R].LFDEPQLASLCLDTIDK.[S]	1xCarbamidomethyl [C11]; 1xTMTpro [K17]; 1xTMTpro [N-Term]	8.3143e-06	4.83621e-05	1	1	1	1	P58544 [195-211]	P58544 1xCarbamidomethyl [C205]	0	2586.4	0.99	0.946787	0.985313	519.3	524.8	3.46	2.67	540.2	512.6	498.4	526.2	526.4	497.8	523.3	526.3		High	High	High	High	High	High	High	High	High	n/a	2.13e-05		1.967e-06		21		100
Q3TMH2	Secernin-3 OS=Mus musculus OX=10090 GN=Scrn3 PE=1 SV=1	[R].LFDEVQEVIYCPAAVHNDLEK.[R]	1xCarbamidomethyl [C11]; 1xTMTpro [K21]; 1xTMTpro [N-Term]	3.26072e-10	4.83621e-05	1	1	1	4	Q3TMH2 [30-50]	Q3TMH2 1xCarbamidomethyl [C40]	0	3097.62	1.055	0.80965	0.939442	2578.4	2444.4	15.49	16.52	2969.5	2429.1	2736.9	2058	2361.8	2334.9	2529.9	3257.4		High	High	High	High	High	High	High	High	High	n/a	2.13e-05		3.392e-12		68		100
Q9DC51; P08752; B2RSH2	Guanine nucleotide-binding protein G(i) subunit alpha-3 OS=Mus musculus OX=10090 GN=Gnai3 PE=1 SV=3 Guanine nucleotide-binding protein G(i) subunit alpha-2 OS=Mus musculus OX=10090 GN=Gnai2 PE=1 SV=5 Guanine nucleotide-binding protein G(i) subunit alpha-1 OS=Mus musculus OX=10090 GN=Gnai1 PE=1 SV=1	[K].LFDSICNNK.[W]	1xCarbamidomethyl [C6]; 1xTMTpro [K9]; 1xTMTpro [N-Term]	1.63501e-05	4.83621e-05	3	3	1	8	Q9DC51 [249-257]; P08752 [250-258]; B2RSH2 [249-257]	Q9DC51 1xCarbamidomethyl [C254]; P08752 1xCarbamidomethyl [C255]; B2RSH2 1xCarbamidomethyl [C254]	0	1718.94	0.968	0.784283	0.93128	9502.7	9814	14.19	2.98	9715	8283	11580.6	9295	9905	9555	9723.9	10241.9	Shared	High	High	High	High	High	High	High	High	High	Low	2.13e-05	0.701	4.81e-06	1	42	1.76	100
Q9R1R2	Tripartite motif-containing protein 3 OS=Mus musculus OX=10090 GN=Trim3 PE=1 SV=1	[R].TGSAELCAEITGPDGVR.[L]	1xCarbamidomethyl [C7]; 1xTMTpro [N-Term]	3.59649e-09	4.83621e-05	1	1	1	2	Q9R1R2 [357-373]	Q9R1R2 1xCarbamidomethyl [C363]	0	2037.02	0.978	0.26568	0.634631	971.8	993.8	1.86	4.29	974.7	968.9	954.1	997.6	1064.3	998.9	988.8	963.2		High	High	High	High	High	High	High	High	High	Low	2.13e-05	0.9242	7.845e-11	1	74	2.02	100
P70704	Phospholipid-transporting ATPase IA OS=Mus musculus OX=10090 GN=Atp8a1 PE=1 SV=2	[K].TGTLTCNVMQFK.[K]	1xCarbamidomethyl [C6]; 1xTMTpro [K12]; 1xTMTpro [N-Term]	3.96675e-08	4.83621e-05	1	1	1	2	P70704 [411-422]	P70704 1xCarbamidomethyl [C416]	0	2008.09	1.023	0.614835	0.860201	2713.7	2653.1	7.67	1.52	2980.2	2490.9	2788.1	2641.2	2675.2	2712.1	2631.2	2626		High	High	High	High	High	High	High	High	High	n/a	2.13e-05		1.811e-09		66		100
Q61548	Clathrin coat assembly protein AP180 OS=Mus musculus OX=10090 GN=Snap91 PE=1 SV=1	[K].LFACYNDGVINLLEK.[F]	1xCarbamidomethyl [C4]; 1xTMTpro [K15]; 1xTMTpro [N-Term]	5.61531e-09	4.83621e-05	1	1	1	5	Q61548 [207-221]	Q61548 1xCarbamidomethyl [C210]	0	2377.31	1.169	0.0508344	0.338242	5932.4	5074	12.67	5.81	5736.2	5373	7163.7	6135.2	4682.9	5016.9	5131.9	5390.7		High	High	High	High	High	High	High	High	High	n/a	2.13e-05		1.398e-10		47		100
Q8R2U4	N-terminal Xaa-Pro-Lys N-methyltransferase 1 OS=Mus musculus OX=10090 GN=Ntmt1 PE=1 SV=3	[K].TGTSCALDCGAGIGR.[I]	2xCarbamidomethyl [C5; C9]; 1xTMTpro [N-Term]	3.37096e-10	4.83621e-05	1	1	1	1	Q8R2U4 [60-74]	Q8R2U4 2xCarbamidomethyl [C64; C68]	0	1799.87	0.969	0.864945	0.959777	386.3	398.8	7.02	4.45	402	371.3	424.9	366.3	369	407.7	393.4	404.3		High	High	High	High	High	High	High	High	High	n/a	2.13e-05		3.565e-12		66		100
E9Q4P1	WD repeat and FYVE domain-containing protein 1 OS=Mus musculus OX=10090 GN=Wdfy1 PE=1 SV=1	[K].LEQNTCSVITTLK.[G]	1xCarbamidomethyl [C6]; 1xTMTpro [K13]; 1xTMTpro [N-Term]	3.76024e-05	4.83621e-05	1	1	1	1	E9Q4P1 [184-196]	E9Q4P1 1xCarbamidomethyl [C189]	0	2115.2	2.48	8.54247e-05	0.0567396	1115.3	449.7	11.14	4.4	1094.9	1041.9	1336	1136.1	451.9	420.5	467.8	447.6		High	High	High	High	High	High	High	High	High	n/a	2.13e-05		1.48e-05		44		100
P42859	Huntingtin OS=Mus musculus OX=10090 GN=Htt PE=1 SV=2	[K].LEQVDVNLFCLVATDFYR.[H]	1xCarbamidomethyl [C10]; 1xTMTpro [N-Term]	5.49468e-08	4.83621e-05	1	1	1	1	P42859 [3060-3077]	P42859 1xCarbamidomethyl [C3069]	0	2506.3	1.089	0.020405	0.246289	385.6	354.1	4.67	3.34	369.8	413.2	387.6	383.5	365.3	345.1	363.4	342.9		High	High	High	High	High	High	High	High	High	n/a	2.13e-05		2.768e-09		76		100
Q9CZR8	Elongation factor Ts, mitochondrial OS=Mus musculus OX=10090 GN=Tsfm PE=1 SV=1	[K].TGYSFVNCK.[K]	1xCarbamidomethyl [C8]; 1xTMTpro [K9]; 1xTMTpro [N-Term]	3.59645e-05	4.83621e-05	1	1	1	1	Q9CZR8 [56-64]	Q9CZR8 1xCarbamidomethyl [C63]	0	1683.9	0.962	0.59094	0.849955	426.3	443.2	5.07	9.79	455.5	426.6	402.5	426.1	392.6	424	491.2	463.2		High	High	High	High	High	High	High	High	High	n/a	3.58e-05		0.0005293		47		100
Q9D0Q7	39S ribosomal protein L45, mitochondrial OS=Mus musculus OX=10090 GN=Mrpl45 PE=1 SV=1	[R].LERPIHLACTAGIFDPYVPPEGDAR.[M]	1xCarbamidomethyl [C9]; 1xTMTpro [N-Term]	6.29833e-10	4.83621e-05	1	1	1	1	Q9D0Q7 [72-96]	Q9D0Q7 1xCarbamidomethyl [C80]	1	3098.61	1.056	0.766383	0.924549	491.2	465.2	10.14	6.73	483.8	530.4	414.7	498.7	515.6	440.1	463.3	467		High	High	High	High	High	High	High	High	High	Low	2.13e-05	0.9514	8.07e-12	1	46	1.78	100
Q08460	Calcium-activated potassium channel subunit alpha-1 OS=Mus musculus OX=10090 GN=Kcnma1 PE=1 SV=2	[K].IESADACLILANK.[Y]	1xCarbamidomethyl [C7]; 1xTMTpro [K13]; 1xTMTpro [N-Term]	7.66742e-05	4.83621e-05	1	1	1	1	Q08460 [481-493]	Q08460 1xCarbamidomethyl [C487]	0	2026.15	1.017	0.976034	0.993332	603.8	593.7	5.73	0.9	548.7	593.8	626.6	613.9	591.4	589.2	601.2	596		High	High	High	High	High	High	High	High	High	n/a	2.13e-05		4.036e-05		32		100
Q8JZR6; Q5DTL9	Electroneutral sodium bicarbonate exchanger 1 OS=Mus musculus OX=10090 GN=Slc4a8 PE=2 SV=1 Sodium-driven chloride bicarbonate exchanger OS=Mus musculus OX=10090 GN=Slc4a10 PE=1 SV=2	[K].LESECSAPGEQPK.[F]	1xCarbamidomethyl [C5]; 1xTMTpro [K13]; 1xTMTpro [N-Term]	1.13632e-08	4.83621e-05	2	2	1	2	Q8JZR6 [857-869]; Q5DTL9 [890-902]	Q8JZR6 1xCarbamidomethyl [C861]; Q5DTL9 1xCarbamidomethyl [C894]	0	2040.06	0.967	0.355396	0.711056	2276.4	2353.3	9.08	8.71	2187.9	2049.1	2523.6	2368.4	2738.1	2338.9	2265.2	2367.9	Shared	High	High	High	High	High	High	High	High	High	n/a	2.13e-05		3.523e-10		66		100
Q7TN74	Neurabin I OS=Mus musculus OX=10090 GN=Ppp1r9a PE=1 SV=1	[K].LESYWIEAQTLCHTVNEHLK.[E]	1xCarbamidomethyl [C12]; 1xTMTpro [K20]; 1xTMTpro [N-Term]	2.59183e-08	4.83621e-05	1	1	1	5	Q7TN74 [733-752]	Q7TN74 1xCarbamidomethyl [C744]	0	3079.62	0.859	0.145344	0.504427	2509.2	2920.6	3.74	15.35	2573.8	2398.6	2446.3	2587.3	2407	2788.1	3475.5	3059.3		High	High	High	High	High	High	High	High	n/a	High		0.0003185		2.447e-09		6.65	100
O70228	Probable phospholipid-transporting ATPase IIA OS=Mus musculus OX=10090 GN=Atp9a PE=1 SV=3	[K].LETATCTAK.[N]	1xCarbamidomethyl [C6]; 1xTMTpro [K9]; 1xTMTpro [N-Term]	6.92085e-05	4.83621e-05	1	1	1	2	O70228 [681-689]	O70228 1xCarbamidomethyl [C686]	0	1602.9	1.123	0.000202069	0.0652741	793.9	707.1	1.8	2.05	804.3	779.8	783.6	807.9	710.8	698	731.3	703.4		High	High	High	High	High	High	High	High	High	n/a	2.13e-05		3.469e-05		47		100
Q91X56	Sphingosine 1-phosphate receptor 5 OS=Mus musculus OX=10090 GN=S1pr5 PE=1 SV=1	[R].LETCSTVLPLYAK.[A]	1xCarbamidomethyl [C4]; 1xTMTpro [K13]; 1xTMTpro [N-Term]	7.2638e-05	4.83621e-05	1	1	1	1	Q91X56 [179-191]	Q91X56 1xCarbamidomethyl [C182]	0	2103.2	1.205	0.690316	0.894652	881.7	731.9	7.06	31.75	937.2	897.2	791.5	866.5	1244.7	719.8	670.9	744.3		High	High	High	High	High	High	High	High	High	n/a	2.13e-05		3.716e-05		42		100
Q9WV69	Dematin OS=Mus musculus OX=10090 GN=Dmtn PE=1 SV=1	[K].IETDYWPCPPSLAVVETEWR.[K]	1xCarbamidomethyl [C8]; 1xTMTpro [N-Term]	2.07728e-07	4.83621e-05	1	1	1	2	Q9WV69 [187-206]	Q9WV69 1xCarbamidomethyl [C194]	0	2752.36	1.025	0.431871	0.761856	825.7	805.9	6.53	9.34	814.5	904.4	774.5	837.1	701.9	767.5	861.7	846.2		High	High	High	High	High	High	High	High	High	n/a	2.13e-05		1.574e-08		52		100
P62889	60S ribosomal protein L30 OS=Mus musculus OX=10090 GN=Rpl30 PE=1 SV=2	[K].TGVHHYSGNNIELGTACGK.[Y]	1xCarbamidomethyl [C17]; 1xTMTpro [K19]; 1xTMTpro [N-Term]	7.76717e-12	4.83621e-05	1	1	1	1	P62889 [69-87]	P62889 1xCarbamidomethyl [C85]	0	2623.35	1	0.931455	0.981211	731.4	731.6	8.88	8.34	819.5	705.3	669	758.5	683.5	678.3	790.5	783		High	High	High	High	High	High	High	High	High	n/a	2.13e-05		2.575e-14		53		100
P63101	14-3-3 protein zeta/delta OS=Mus musculus OX=10090 GN=Ywhaz PE=1 SV=1	[K].IETELRDICNDVLSLLEK.[F]	1xCarbamidomethyl [C9]; 1xTMTpro [K18]; 1xTMTpro [N-Term]	4.75526e-09	4.83621e-05	1	1	1	5	P63101 [86-103]	P63101 1xCarbamidomethyl [C94]	1	2768.54	0.999	0.379966	0.726429	4657.1	4661.9	24.4	21.75	4967.8	4141.9	6875.1	4365.9	2982.4	4448.3	4885.7	5066.4		High	High	High	High	High	High	High	High	High	n/a	2.13e-05		1.13e-10		31		100
P51410	60S ribosomal protein L9 OS=Mus musculus OX=10090 GN=Rpl9 PE=1 SV=2	[R].TGVACSVSQAQK.[D]	1xCarbamidomethyl [C5]; 1xTMTpro [K12]; 1xTMTpro [N-Term]	9.49563e-09	4.83621e-05	1	1	1	2	P51410 [130-141]	P51410 1xCarbamidomethyl [C134]	0	1844.02	1.049	0.373808	0.723479	1080.5	1029.7	14.33	5.1	1126	949.8	1320.8	1036.9	950.3	1029.8	1029.6	1075.7		High	High	High	High	High	High	High	High	High	n/a	2.13e-05		2.787e-10		80		100
Q99J08	SEC14-like protein 2 OS=Mus musculus OX=10090 GN=Sec14l2 PE=1 SV=1	[K].IETITMIYDCEGLGLK.[H]	1xCarbamidomethyl [C10]; 1xTMTpro [K16]; 1xTMTpro [N-Term]	6.38512e-06	4.83621e-05	1	1	1	1	Q99J08 [146-161]	Q99J08 1xCarbamidomethyl [C155]	0	2464.33	1.091	0.11611	0.459601	992.2	909.8	5.56	4.6	920.5	1013	1048.1	971.8	986.4	903.7	891.6	915.9		High	High	High	High	High	High	High	High	High	n/a	2.13e-05		1.395e-06		28		100
Q01339	Beta-2-glycoprotein 1 OS=Mus musculus OX=10090 GN=Apoh PE=1 SV=1	[K].TGTWSFLPTCR.[E]	1xCarbamidomethyl [C10]; 1xTMTpro [N-Term]	1.25011e-05	4.83621e-05	1	1	1	1	Q01339 [251-261]	Q01339 1xCarbamidomethyl [C260]	0	1629.84	1.085	0.399806	0.740349	1179.1	1086.6	34.99	2.86	937.3	1109.8	1988.5	1252.7	1116	1099.8	1045.2	1073.6		High	High	High	High	High	High	High	High	High	n/a	2.13e-05		3.375e-06		37		100
O55143	Sarcoplasmic/endoplasmic reticulum calcium ATPase 2 OS=Mus musculus OX=10090 GN=Atp2a2 PE=1 SV=2	[R].IEVASSVKLCR.[Q]	1xCarbamidomethyl [C10]; 1xTMTpro [K8]; 1xTMTpro [N-Term]	2.34856e-06	4.83621e-05	1	1	1	5	O55143 [604-614]	O55143 1xCarbamidomethyl [C613]	1	1870.11	0.948	0.267216	0.63614	5486.5	5789.2	7.93	3.68	5482.3	5490.7	4906.1	5963.9	5682.4	5898.1	5976.8	5508.7		High	High	High	High	High	High	High	High	High	High	2.13e-05	0.0003185	3.758e-07	0.007099	36	3.31	100
Q922B1	ADP-ribose glycohydrolase MACROD1 OS=Mus musculus OX=10090 GN=Macrod1 PE=1 SV=2	[K].LEVDAIVNAANSSLLGGGGVDGCIHR.[A]	1xCarbamidomethyl [C23]; 1xTMTpro [N-Term]	1.35786e-11	4.83621e-05	1	1	1	1	Q922B1 [162-187]	Q922B1 1xCarbamidomethyl [C184]	0	2898.51	1.011	0.810825	0.940207	540.5	534.6	4.06	1.28	510.3	563	536.5	544.5	537.9	528.4	543.7	531.3		High	High	High	High	High	High	High	High	High	n/a	2.13e-05		5.345e-14		78		100
Q99P47	Contactin-associated protein-like 4 OS=Mus musculus OX=10090 GN=Cntnap4 PE=1 SV=2	[R].IEVFGCAYR.[S]	1xCarbamidomethyl [C6]; 1xTMTpro [N-Term]	2.78362e-05	4.83621e-05	1	1	1	1	Q99P47 [174-182]	Q99P47 1xCarbamidomethyl [C179]	0	1418.74	1.044	0.285299	0.653679	1481.7	1419.8	5.03	6.02	1423.8	1436	1528.9	1580	1444	1533.4	1395.9	1329.4		High	High	High	High	High	High	High	High	High	n/a	2.13e-05		9.82e-06		40		100
O54991	Contactin-associated protein 1 OS=Mus musculus OX=10090 GN=Cntnap1 PE=1 SV=2	[R].TGTSYFFGGCPKPASR.[W]	1xCarbamidomethyl [C10]; 1xTMTpro [K12]; 1xTMTpro [N-Term]	3.44976e-08	4.83621e-05	1	1	1	1	O54991 [479-494]	O54991 1xCarbamidomethyl [C488]	1	2341.23	0.811	0.377117	0.724954	1246.7	1537	24.1	5.81	1843.2	1335.8	1128.6	1163.6	1529.4	1383.2	1544.6	1584		High	High	High	High	High	High	High	High	High	n/a	2.13e-05		1.505e-09		50		100
P36993	Protein phosphatase 1B OS=Mus musculus OX=10090 GN=Ppm1b PE=1 SV=1	[R].LEVSDDLENVCNWVVDTCLHK.[G]	2xCarbamidomethyl [C11; C18]; 1xTMTpro [K21]; 1xTMTpro [N-Term]	7.32644e-09	4.83621e-05	1	1	1	2	P36993 [262-282]	P36993 2xCarbamidomethyl [C272; C279]	0	3153.58	1.031	0.396155	0.738406	832.2	807	11.47	3.86	868.7	797.3	989.4	769.3	766.2	804.1	809.9	842		High	High	High	High	High	High	High	High	High	n/a	2.13e-05		1.985e-10		49		100
O54991	Contactin-associated protein 1 OS=Mus musculus OX=10090 GN=Cntnap1 PE=1 SV=2	[R].TGTSYFFGGCPK.[P]	1xCarbamidomethyl [C10]; 1xTMTpro [K12]; 1xTMTpro [N-Term]	1.47007e-07	4.83621e-05	1	1	1	6	O54991 [479-490]	O54991 1xCarbamidomethyl [C488]	0	1930	0.982	0.913869	0.976199	7100.8	7232.3	9.61	6.56	7405.6	6435.2	6808.6	8003.3	7064.3	7484.5	7404.4	6460		High	High	High	High	High	High	High	High	High	n/a	2.13e-05		9.966e-09		71		100
Q8BK67	Protein RCC2 OS=Mus musculus OX=10090 GN=Rcc2 PE=1 SV=1	[R].IEYDCELVPR.[R]	1xCarbamidomethyl [C5]; 1xTMTpro [N-Term]	4.01824e-06	4.83621e-05	1	1	1	1	Q8BK67 [299-308]	Q8BK67 1xCarbamidomethyl [C303]	0	1597.82	1.044	0.34881	0.706426	1337.5	1281.1	7.62	10.7	1281.7	1322	1519.3	1353.2	1301.4	1451.8	1118	1261.1		High	High	High	High	High	High	High	High	High	n/a	2.13e-05		7.564e-07		55		100
V9GX34	CUB and Sushi multiple domains 2 OS=Mus musculus OX=10090 GN=Csmd2 PE=1 SV=2	[K].LEYQAYELQECPDPEPFANGIVR.[G]	1xCarbamidomethyl [C11]; 1xTMTpro [N-Term]	6.38512e-06	4.83621e-05	1	1	1	1	V9GX34 [2116-2138]	V9GX34 1xCarbamidomethyl [C2126]	0	3042.48	0.941	0.539496	0.823706	241.8	257	3.08	7.6	235.8	234.7	248.4	247.9	253	221.4	261	261.3		High	High	High	High	High	High	High	High	n/a	High		0.0003185		1.933e-06		6.04	100
P42932	T-complex protein 1 subunit theta OS=Mus musculus OX=10090 GN=Cct8 PE=1 SV=3	[K].LIAQACVSIFPDSGNFNVDNIR.[V]	1xCarbamidomethyl [C6]; 1xTMTpro [N-Term]	7.89618e-10	4.83621e-05	1	1	1	15	P42932 [182-203]	P42932 1xCarbamidomethyl [C187]	0	2754.42	1.115	0.146856	0.50642	7485.4	6713.6	9.22	6.11	6641.6	7569	8322.9	7402.8	7323.1	6935.7	6432.1	6498.6		High	High	High	High	High	High	High	High	High	n/a	2.13e-05		1.081e-11		87		100
Q924T7	E3 ubiquitin-protein ligase RNF31 OS=Mus musculus OX=10090 GN=Rnf31 PE=1 SV=2	[R].LLAQECAVCGWALPR.[N]	2xCarbamidomethyl [C6; C9]; 1xTMTpro [N-Term]	1.97679e-09	4.83621e-05	1	1	1	2	Q924T7 [688-702]	Q924T7 2xCarbamidomethyl [C693; C696]	0	2048.07	1.103	0.295238	0.663353	1032.8	936.1	11.13	6.33	983.8	1164.1	901.1	1084.3	1040.3	907.8	956.1	916.6		High	High	High	High	High	High	High	High	High	n/a	2.13e-05		3.586e-11		20		100
Q8R3S6	Exocyst complex component 1 OS=Mus musculus OX=10090 GN=Exoc1 PE=1 SV=4	[R].LLSIVNVCK.[A]	1xCarbamidomethyl [C8]; 1xTMTpro [K9]; 1xTMTpro [N-Term]	1.58246e-05	4.83621e-05	1	1	1	2	Q8R3S6 [20-28]	Q8R3S6 1xCarbamidomethyl [C27]	0	1654.02	0.879	0.0543083	0.347534	1665.8	1894.3	11.56	3.36	1695.9	1636.3	1330.9	1740.8	2002	1852.3	1888.1	1900.5		High	High	High	High	High	High	High	High	High	n/a	2.13e-05		4.607e-06		51		100
Q6ZWR6	Nesprin-1 OS=Mus musculus OX=10090 GN=Syne1 PE=1 SV=2	[K].LLSNFGECVQYK.[E]	1xCarbamidomethyl [C8]; 1xTMTpro [K12]; 1xTMTpro [N-Term]	1.47988e-07	4.83621e-05	1	1	1	1	Q6ZWR6 [1227-1238]	Q6ZWR6 1xCarbamidomethyl [C1234]	0	2066.12	0.896	0.311262	0.676744	877.7	979.2	7.05	13.22	942	883	792.4	872.4	795.1	919.5	1042.8	1071.1		High	High	High	High	High	High	High	High	High	n/a	2.13e-05		1.005e-08		25		100
P59764	Dedicator of cytokinesis protein 4 OS=Mus musculus OX=10090 GN=Dock4 PE=1 SV=1	[R].ILSNVFCLIK.[K]	1xCarbamidomethyl [C7]; 1xTMTpro [K10]; 1xTMTpro [N-Term]	9.81617e-05	4.83621e-05	1	1	1	1	P59764 [854-863]	P59764 1xCarbamidomethyl [C860]	0	1815.11	1.047	0.52993	0.819405	345.8	330.3	8.08	3.6	358.8	342.5	297.3	349.1	327.7	308.7	332.8	334.1		High	High	High	High	High	High	High	High	High	n/a	2.13e-05		5.787e-05		54		100
Q07113	Cation-independent mannose-6-phosphate receptor OS=Mus musculus OX=10090 GN=Igf2r PE=1 SV=1	[K].SVSSTIFFHCDPLVK.[D]	1xCarbamidomethyl [C10]; 1xTMTpro [K15]; 1xTMTpro [N-Term]	8.82584e-09	4.83621e-05	1	1	1	2	Q07113 [2232-2246]	Q07113 1xCarbamidomethyl [C2241]	0	2345.28	0.967	0.20973	0.58079	1609.8	1664.5	6.75	4.65	1679.6	1565.6	1443.3	1655.3	1668	1604.4	1789.9	1660.9		High	High	High	High	High	High	High	High	High	n/a	2.13e-05		2.53e-10		31		100
Q9R1T4	Septin-6 OS=Mus musculus OX=10090 GN=Septin6 PE=1 SV=4	[K].SVSQGFCFNILCVGETGLGK.[S]	2xCarbamidomethyl [C7; C12]; 1xTMTpro [K20]; 1xTMTpro [N-Term]	4.34008e-10	4.83621e-05	1	1	1	6	Q9R1T4 [36-55]	Q9R1T4 2xCarbamidomethyl [C42; C47]	0	2781.46	0.951	0.23122	0.601363	4111.6	4324.1	4.37	8.59	4174.2	4015.6	4417.1	4049.9	5008	4150.2	4268.1	4380.9		High	High	High	High	High	High	High	High	High	n/a	2.13e-05		4.956e-12		78		100
Q8R313	Exocyst complex component 6 OS=Mus musculus OX=10090 GN=Exoc6 PE=1 SV=2	[R].ILSSCLLNLIR.[K]	1xCarbamidomethyl [C5]; 1xTMTpro [N-Term]	9.08618e-07	4.83621e-05	1	1	1	2	Q8R313 [526-536]	Q8R313 1xCarbamidomethyl [C530]	0	1605.97	0.91	0.0148497	0.218271	1180.9	1298.1	5	3.84	1087	1162.8	1199.2	1219.6	1364.7	1319.8	1276.7	1250.9		High	High	High	High	High	High	High	High	High	n/a	2.13e-05		1.081e-07		43		100
Q6PIE5	Sodium/potassium-transporting ATPase subunit alpha-2 OS=Mus musculus OX=10090 GN=Atp1a2 PE=1 SV=1	[R].IISSHGCK.[V]	1xCarbamidomethyl [C7]; 1xTMTpro [K8]; 1xTMTpro [N-Term]	2.22015e-05	4.83621e-05	1	1	1	9	Q6PIE5 [203-210]	Q6PIE5 1xCarbamidomethyl [C209]	0	1509.87	1.015	0.678493	0.889668	5706.3	5620.6	4.92	13.58	5820.5	5594.4	5369.6	6018.8	6250.1	6102.2	4672.1	5176.9		High	High	High	High	High	High	High	High	High	High	2.13e-05	0.0003185	7.274e-06	0.007636	30	1.22	100
Q6PIE5	Sodium/potassium-transporting ATPase subunit alpha-2 OS=Mus musculus OX=10090 GN=Atp1a2 PE=1 SV=1	[R].IISSHGCKVDNSSLTGESEPQTR.[S]	1xCarbamidomethyl [C7]; 1xTMTpro [K8]; 1xTMTpro [N-Term]	2.70676e-10	4.83621e-05	1	1	1	3	Q6PIE5 [203-225]	Q6PIE5 1xCarbamidomethyl [C209]	1	3110.6	0.992	0.962376	0.989228	2740.7	2764	2.84	15.05	2775.4	2706.4	2667.9	2845	3263.6	2975.6	2322.8	2567.4		High	High	High	High	High	High	High	High	High	n/a	2.13e-05		2.661e-12		48		100
E9Q2E4	HECT domain E3 ubiquitin protein ligase 4 OS=Mus musculus OX=10090 GN=Hectd4 PE=1 SV=2	[K].LLSTVPAASSCLR.[Y]	1xCarbamidomethyl [C11]; 1xTMTpro [N-Term]	8.99851e-06	4.83621e-05	1	1	1	1	E9Q2E4 [871-883]	E9Q2E4 1xCarbamidomethyl [C881]	0	1678.95	0.981	0.808033	0.939143	909.5	927.4	1.98	4.36	892.2	909.8	909.3	936	864.4	944	952.9	911.1		High	High	High	High	High	High	High	High	n/a	High		0.0003185		2.943e-06		3.63	100
Q6NVE8	WD repeat-containing protein 44 OS=Mus musculus OX=10090 GN=Wdr44 PE=1 SV=1	[K].LITAANFCQNGK.[Y]	1xCarbamidomethyl [C8]; 1xTMTpro [K12]; 1xTMTpro [N-Term]	3.42689e-08	4.83621e-05	1	1	1	3	Q6NVE8 [696-707]	Q6NVE8 1xCarbamidomethyl [C703]	0	1945.08	1.023	0.363188	0.716571	1826.1	1785.5	7.61	4.6	1748.2	1732.2	2030	1907.3	1815.6	1850.7	1664.6	1755.9		High	High	High	High	High	High	High	High	High	n/a	2.13e-05		1.493e-09		69		100
Q8R127	Saccharopine dehydrogenase-like oxidoreductase OS=Mus musculus OX=10090 GN=Sccpdh PE=1 SV=1	[R].SVSCLKPVPIVGTK.[L]	1xCarbamidomethyl [C4]; 2xTMTpro [K6; K14]; 1xTMTpro [N-Term]	6.69301e-07	4.83621e-05	1	1	1	2	Q8R127 [215-228]	Q8R127 1xCarbamidomethyl [C218]	1	2397.47	0.887	0.226937	0.59618	2144.5	2418.5	15.9	12.25	2548.4	1992.7	1770.6	2307.8	2864.3	2413	2424	2135.7		High	High	High	High	High	High	High	High	High	n/a	2.13e-05		7.227e-08		20		100
O70481	E3 ubiquitin-protein ligase UBR1 OS=Mus musculus OX=10090 GN=Ubr1 PE=1 SV=2	[K].ILTCMQGMEEIRR.[Q]	1xCarbamidomethyl [C4]; 1xTMTpro [N-Term]	4.67926e-06	4.83621e-05	1	1	1	1	O70481 [508-520]	O70481 1xCarbamidomethyl [C511]	1	1941	1.112	0.291611	0.659865	773.7	695.9	11.82	12.26	680.7	796.4	901.3	751.6	818.6	740.4	627.1	654.1		High	High	High	High	High	High	High	High	High	n/a	2.13e-05		9.288e-07		21		100
Q9D304	E3 ubiquitin-protein ligase RNF128 OS=Mus musculus OX=10090 GN=Rnf128 PE=1 SV=1	[R].ILTCNHIFHK.[T]	1xCarbamidomethyl [C4]; 1xTMTpro [K10]; 1xTMTpro [N-Term]	0.000111259	4.83621e-05	1	1	1	1	Q9D304 [292-301]	Q9D304 1xCarbamidomethyl [C295]	0	1891.09	1.376	0.130496	0.483271	469.8	341.4	14.87	20.55	439.1	502.7	365.4	511.2	478.2	331.4	309.7	351.8		High	High	High	High	High	High	High	High	High	n/a	2.13e-05		7.032e-05		19		100
Q9D7K2	CST complex subunit TEN1 OS=Mus musculus OX=10090 GN=Ten1 PE=1 SV=1	[R].LLTCVEGMDLSLLEK.[A]	1xCarbamidomethyl [C4]; 1xTMTpro [K15]; 1xTMTpro [N-Term]	7.58096e-06	4.83621e-05	1	1	1	1	Q9D7K2 [92-106]	Q9D7K2 1xCarbamidomethyl [C95]	0	2329.3	0.941	0.255079	0.625748	685.1	728.2	6.81	3.71	702.1	668.5	752.7	643.9	756.8	721.9	692.2	734.6		High	High	High	High	High	High	High	High	High	n/a	2.13e-05		1.745e-06		52		100
Q8CCB4	Vacuolar protein sorting-associated protein 53 homolog OS=Mus musculus OX=10090 GN=Vps53 PE=1 SV=1	[K].LLTDCNSETFQK.[I]	1xCarbamidomethyl [C5]; 1xTMTpro [K12]; 1xTMTpro [N-Term]	4.07368e-08	4.83621e-05	1	1	1	2	Q8CCB4 [760-771]	Q8CCB4 1xCarbamidomethyl [C764]	0	2064.09	0.941	0.475906	0.78689	2116.5	2248.2	3.64	6.6	2149.3	2069.3	2084.2	2239.8	1993.1	2322.3	2271.6	2225		High	High	High	High	High	High	High	High	High	n/a	2.13e-05		1.874e-09		75		100
Q80XQ2	TBC1 domain family member 5 OS=Mus musculus OX=10090 GN=Tbc1d5 PE=1 SV=2	[K].ILTDVLFCYAR.[E]	1xCarbamidomethyl [C8]; 1xTMTpro [N-Term]	1.51539e-06	4.83621e-05	1	1	1	1	Q80XQ2 [185-195]	Q80XQ2 1xCarbamidomethyl [C192]	0	1674.92	1.152	0.129411	0.481596	1106.7	960.9	14.91	5.59	918.1	1058.5	1311.8	1157	980.7	987	872	941.6		High	High	High	High	High	High	High	High	High	Low	2.13e-05	0.9641	2.109e-07	1	41	1.35	100
Q9R0P3	S-formylglutathione hydrolase OS=Mus musculus OX=10090 GN=Esd PE=1 SV=1	[R].SVSAFAPICNPVLCSWGKK.[A]	2xCarbamidomethyl [C9; C14]; 2xTMTpro [K18; K19]; 1xTMTpro [N-Term]	1.06321e-08	4.83621e-05	1	1	1	2	Q9R0P3 [168-186]	Q9R0P3 2xCarbamidomethyl [C176; C181]	1	3033.68	0.895	0.924026	0.97967	1875.6	2095.5	14.67	23.86	2254.1	1752.6	2007.2	1622.4	1299.5	2084.8	2106.4	2397.6		High	High	High	High	High	High	High	High	High	n/a	2.13e-05		3.219e-10		41		100
Q9ERK4	Exportin-2 OS=Mus musculus OX=10090 GN=Cse1l PE=1 SV=1	[K].LLTECPPMMDTEYTK.[L]	1xCarbamidomethyl [C5]; 1xTMTpro [K15]; 1xTMTpro [N-Term]	8.55872e-07	4.83621e-05	1	1	1	1	Q9ERK4 [849-863]	Q9ERK4 1xCarbamidomethyl [C853]	0	2437.23	0.884	0.219931	0.590149	610.9	691.4	3.34	10.28	631.6	625.1	590.2	597	566.9	679.9	703.1	718		High	High	High	High	High	High	High	High	High	n/a	2.13e-05		9.975e-08		51		100
B1AUN2	Eukaryotic translation initiation factor 2B, subunit 3 OS=Mus musculus OX=10090 GN=Eif2b3 PE=1 SV=1	[K].LLSVLCPEESMIHSSAQIVNK.[H]	1xCarbamidomethyl [C6]; 1xTMTpro [K21]; 1xTMTpro [N-Term]	2.36419e-06	4.83621e-05	1	1	1	2	B1AUN2 [329-349]	B1AUN2 1xCarbamidomethyl [C334]	0	2963.62	0.762	0.00774901	0.175409	1408.2	1846.9	7.78	9.71	1556.3	1403.8	1287.4	1412.6	1597.9	1783.6	2007.7	1912.5		High	High	High	High	High	High	High	High	n/a	High		0.0003185		5.794e-07		7.11	100
P97351	40S ribosomal protein S3a OS=Mus musculus OX=10090 GN=Rps3a PE=1 SV=3	[K].LITEDVQGKNCLTNFHGMDLTR.[D]	1xCarbamidomethyl [C11]; 1xTMTpro [K9]; 1xTMTpro [N-Term]	2.60912e-08	4.83621e-05	1	1	1	1	P97351 [86-107]	P97351 1xCarbamidomethyl [C96]	1	3170.66	1.096	0.737249	0.912753	369.6	337.2	16.24	5.82	366.2	396.5	267.6	373.2	311	334.1	358.4	340.3		High	High	High	High	High	High	High	High	High	n/a	2.13e-05		1.044e-09		40		100
Q04690	Neurofibromin OS=Mus musculus OX=10090 GN=Nf1 PE=1 SV=1	[R].LLSLMVCNHEK.[V]	1xCarbamidomethyl [C7]; 1xTMTpro [K11]; 1xTMTpro [N-Term]	9.35343e-08	4.83621e-05	1	1	1	3	Q04690 [900-910]	Q04690 1xCarbamidomethyl [C906]	0	1952.1	0.962	0.180926	0.548367	1625.3	1689.4	6.49	2.63	1622.4	1628.3	1423	1632.3	1604.2	1694	1684.9	1695.2		High	High	High	High	High	High	High	High	High	n/a	2.13e-05		5.535e-09		47		100
Q569Z5	Probable ATP-dependent RNA helicase DDX46 OS=Mus musculus OX=10090 GN=Ddx46 PE=1 SV=2	[R].SVVCSDVEQQVIVIEEEK.[K]	1xCarbamidomethyl [C4]; 1xTMTpro [K18]; 1xTMTpro [N-Term]	3.00185e-06	4.83621e-05	1	1	1	1	Q569Z5 [587-604]	Q569Z5 1xCarbamidomethyl [C590]	0	2698.45	1.029	0.317532	0.682863	374.3	363.8	3.94	3.74	368	361	394.7	380.7	351.5	356.6	381.4	371.1		High	High	High	High	High	High	High	High	High	n/a	2.13e-05		5.181e-07		57		100
Q80YQ2	Mediator of RNA polymerase II transcription subunit 23 OS=Mus musculus OX=10090 GN=Med23 PE=1 SV=2	[K].LISCLAAFR.[Q]	1xCarbamidomethyl [C4]; 1xTMTpro [N-Term]	3.41759e-05	4.83621e-05	1	1	1	1	Q80YQ2 [37-45]	Q80YQ2 1xCarbamidomethyl [C40]	0	1354.78	1.057	0.455528	0.775805	1337.8	1265.5	7.45	11.52	1200.7	1366.3	1309.9	1434.5	1386.3	1381.4	1110.8	1159.3		High	High	High	High	High	High	High	High	High	n/a	2.13e-05		1.302e-05		30		100
Q3UUG6	TBC1 domain family member 24 OS=Mus musculus OX=10090 GN=Tbc1d24 PE=1 SV=2	[R].ILSCNDPTK.[K]	1xCarbamidomethyl [C4]; 1xTMTpro [K9]; 1xTMTpro [N-Term]	6.67315e-05	4.83621e-05	1	1	1	2	Q3UUG6 [158-166]	Q3UUG6 1xCarbamidomethyl [C161]	0	1655.93	1.038	0.56004	0.835476	1481.1	1426.4	6.24	8.5	1532.9	1366.9	1566.5	1430.9	1347.8	1303.5	1509.7	1553.1		High	High	High	High	High	High	High	High	High	Low	2.13e-05	0.07584	3.293e-05	0.4843	19	1.59	100
O55106	Striatin OS=Mus musculus OX=10090 GN=Strn PE=1 SV=2	[R].LLSCSADGTLR.[L]	1xCarbamidomethyl [C4]; 1xTMTpro [N-Term]	9.33091e-07	4.83621e-05	1	1	1	2	O55106 [584-594]	O55106 1xCarbamidomethyl [C587]	0	1496.81	1.055	0.30175	0.668278	2864.1	2715.5	10.77	5.3	2856.9	3324.4	2567	2871.3	2845	2787.9	2527.8	2645		High	High	High	High	High	High	High	High	High	High	2.13e-05	0.0003185	1.121e-07	0.00225	36	2.33	100
Q8CHH9	Septin-8 OS=Mus musculus OX=10090 GN=Septin8 PE=1 SV=4	[K].SVTQGFSFNILCVGETGIGK.[S]	1xCarbamidomethyl [C12]; 1xTMTpro [K20]; 1xTMTpro [N-Term]	2.26584e-11	4.83621e-05	1	1	1	32	Q8CHH9 [38-57]	Q8CHH9 1xCarbamidomethyl [C49]	0	2722.47	0.808	0.598178	0.853549	14490	17927.2	28.6	8.66	14560.9	14254.7	24028.2	14419.4	19401.7	17558.9	15745.2	18303.2		High	High	High	High	High	High	High	High	High	Low	2.13e-05	0.793	1.04e-13	1	121	2.9	100
Q9Z1Q2	Phosphatidylserine lipase ABHD16A OS=Mus musculus OX=10090 GN=Abhd16a PE=1 SV=3	[K].LLSCVLGPR.[L]	1xCarbamidomethyl [C4]; 1xTMTpro [N-Term]	2.49453e-05	4.83621e-05	1	1	1	3	Q9Z1Q2 [4-12]	Q9Z1Q2 1xCarbamidomethyl [C7]	0	1318.78	0.971	0.744835	0.915104	2284.6	2352.1	10.83	23.13	2164.7	2411.2	2006.1	2560.2	2837.1	2987.7	1940.2	1950.1		High	High	High	High	High	High	High	High	High	n/a	2.13e-05		8.506e-06		40		100
P60882	Multiple epidermal growth factor-like domains protein 8 OS=Mus musculus OX=10090 GN=Megf8 PE=1 SV=2	[R].LLSDCQACLAFSSPTAPPR.[G]	2xCarbamidomethyl [C5; C8]; 1xTMTpro [N-Term]	4.66133e-09	4.83621e-05	1	1	1	2	P60882 [608-626]	P60882 2xCarbamidomethyl [C612; C615]	0	2395.21	1.038	0.371649	0.722658	1025.5	987.6	6.57	4.32	1008.4	1119.6	958.1	1042.8	1048.2	999.7	975.6	946.9		High	High	High	High	High	High	High	High	High	n/a	2.13e-05		1.104e-10		76		100
Q80W68	Kin of IRRE-like protein 1 OS=Mus musculus OX=10090 GN=Kirrel1 PE=1 SV=1	[K].SVTQADAGTYTCR.[A]	1xCarbamidomethyl [C12]; 1xTMTpro [N-Term]	3.16406e-08	4.83621e-05	1	1	1	2	Q80W68 [392-404]	Q80W68 1xCarbamidomethyl [C403]	0	1733.84	1.192	0.0149692	0.218317	635.4	533	9.12	5.67	587.3	663.4	718.3	608.7	557	554.7	497.5	512.2		High	High	High	High	High	High	High	High	High	n/a	2.13e-05		1.342e-09		73		100
Q6DFW4	Nucleolar protein 58 OS=Mus musculus OX=10090 GN=Nop58 PE=1 SV=1	[K].IISDNLTYCK.[C]	1xCarbamidomethyl [C9]; 1xTMTpro [K10]; 1xTMTpro [N-Term]	2.82794e-06	4.83621e-05	1	1	1	2	Q6DFW4 [197-206]	Q6DFW4 1xCarbamidomethyl [C205]	0	1835.02	0.873	0.0340659	0.291888	2339.5	2678.7	6.83	8.25	2314.3	2188.1	2365	2575	3042.3	2742.4	2616.5	2525.5		High	High	High	High	High	High	High	High	High	n/a	2.13e-05		4.802e-07		59		100
P15209	BDNF/NT-3 growth factors receptor OS=Mus musculus OX=10090 GN=Ntrk2 PE=1 SV=1	[K].SVTLSCSVGGDPLPTLYWDVGNLVSK.[H]	1xCarbamidomethyl [C6]; 1xTMTpro [K26]; 1xTMTpro [N-Term]	6.46811e-10	4.83621e-05	1	1	1	3	P15209 [213-238]	P15209 1xCarbamidomethyl [C218]	0	3372.8	0.995	0.868425	0.961039	4190.1	4209.2	6.75	11.82	4294.3	3814	4467.9	4088.5	3653.2	4080.3	4848.3	4342.2		High	High	High	High	High	High	High	High	High	n/a	2.13e-05		8.314e-12		101		100
A2AAE1	Transmembrane protein KIAA1109 OS=Mus musculus OX=10090 GN=Kiaa1109 PE=1 SV=4	[R].SVTHVSLVALCFDR.[I]	1xCarbamidomethyl [C11]; 1xTMTpro [N-Term]	2.52637e-06	4.83621e-05	1	1	1	1	A2AAE1 [1749-1762]	A2AAE1 1xCarbamidomethyl [C1759]	0	1908.03	1.098	0.664737	0.883517	403.6	367.7	8.64	13.97	360.8	427.9	380.8	429.8	466.5	372.5	346.3	362.9		High	High	High	High	High	High	High	High	High	Low	2.13e-05	0.9682	4.116e-07	1	56	2.02	100
Q6GV12	3-ketodihydrosphingosine reductase OS=Mus musculus OX=10090 GN=Kdsr PE=1 SV=1	[R].LISETTAICKPEQVAK.[Q]	1xCarbamidomethyl [C9]; 2xTMTpro [K10; K16]; 1xTMTpro [N-Term]	9.67453e-06	4.83621e-05	1	1	1	1	Q6GV12 [237-252]	Q6GV12 1xCarbamidomethyl [C245]	1	2700.58	1.001	0.684595	0.892107	2934.5	2931.2	5.13	6.8	3217.8	2877.7	2930	2939	3081.5	3140.6	2788.3	2748.4		High	High	High	High	High	High	High	High	High	n/a	2.13e-05		2.401e-06		26		100
Q60680	Inhibitor of nuclear factor kappa-B kinase subunit alpha OS=Mus musculus OX=10090 GN=Chuk PE=1 SV=1	[K].IISFLLPCDESLHSLQSR.[I]	1xCarbamidomethyl [C8]; 1xTMTpro [N-Term]	4.89722e-07	4.83621e-05	1	1	1	1	Q60680 [323-340]	Q60680 1xCarbamidomethyl [C330]	0	2419.3	1.007	0.899554	0.972828	490.2	486.9	11.96	10.8	454.7	502.1	593.4	478.6	594.6	479	488.1	485.7		High	High	High	High	High	High	High	High	High	n/a	2.13e-05		4.836e-08		76		100
P01942	Hemoglobin subunit alpha OS=Mus musculus OX=10090 GN=Hba PE=1 SV=2	[K].LLSHCLLVTLASHHPADFTPAVHASLDK.[F]	1xCarbamidomethyl [C5]; 1xTMTpro [K28]; 1xTMTpro [N-Term]	5.49652e-12	4.83621e-05	1	1	1	204	P01942 [101-128]	P01942 1xCarbamidomethyl [C105]	0	3659	0.992	0.412758	0.750712	92806.2	93508.4	35.14	13.5	84363.8	89246.3	166009	96508.1	73795.7	100381	88642.1	98641.8		High	High	High	High	High	High	High	High	High	Low	2.13e-05	0.05256	1.641e-14	0.4213	64	2.86	100
Q8JZV7	N-acetylglucosamine-6-phosphate deacetylase OS=Mus musculus OX=10090 GN=Amdhd2 PE=1 SV=1	[R].LLSHGVTSFCPTLVTSPPEVYHK.[V]	1xCarbamidomethyl [C10]; 1xTMTpro [K23]; 1xTMTpro [N-Term]	2.24301e-09	4.83621e-05	1	1	1	2	Q8JZV7 [98-120]	Q8JZV7 1xCarbamidomethyl [C107]	0	3177.73	1.142	0.0294701	0.278584	1510.9	1322.6	6.35	6.9	1619.2	1564.4	1408.8	1459.3	1339.7	1214.8	1305.8	1435.9		High	High	High	High	High	High	High	High	High	n/a	2.13e-05		4.216e-11		47		100
Q9Z1W9	STE20/SPS1-related proline-alanine-rich protein kinase OS=Mus musculus OX=10090 GN=Stk39 PE=1 SV=1	[K].LLSLCLQK.[D]	1xCarbamidomethyl [C5]; 1xTMTpro [K8]; 1xTMTpro [N-Term]	0.000111886	4.83621e-05	1	1	1	2	Q9Z1W9 [325-332]	Q9Z1W9 1xCarbamidomethyl [C329]	0	1582.98	1.019	0.910244	0.975636	3214.2	3154.5	8.34	5.96	3055.5	2947	3519.8	3381	3469.5	3030	3112.2	3197.4		High	High	High	High	High	High	High	High	High	High	2.13e-05	0.0005594	7.057e-05	0.03318	39	3.04	100
Q8K377	Leucine-rich repeat transmembrane neuronal protein 1 OS=Mus musculus OX=10090 GN=Lrrtm1 PE=2 SV=1	[R].LISLHSLCLR.[R]	1xCarbamidomethyl [C8]; 1xTMTpro [N-Term]	5.94032e-05	4.83621e-05	1	1	1	2	Q8K377 [232-241]	Q8K377 1xCarbamidomethyl [C239]	0	1515.9	0.979	0.752654	0.918816	475	484.9	14.25	4.79	455.1	495.7	599	442.6	487.7	509	452.9	482.2		High	High	High	High	High	High	High	High	High	n/a	2.13e-05		2.793e-05		48		100
Q9WVC3	Caveolin-2 OS=Mus musculus OX=10090 GN=Cav2 PE=1 SV=1	[K].SVTDVVIGPLCTSVGR.[S]	1xCarbamidomethyl [C11]; 1xTMTpro [N-Term]	1.16484e-07	4.83621e-05	1	1	1	1	Q9WVC3 [135-150]	Q9WVC3 1xCarbamidomethyl [C145]	0	1964.08	1.233	0.0444798	0.321572	698.2	566.2	18.56	11.62	640.6	681.3	949.5	715.4	638.9	556.9	480.1	575.6		High	High	High	High	High	High	High	High	High	n/a	2.13e-05		7.407e-09		51		100
Q3U7R1	Extended synaptotagmin-1 OS=Mus musculus OX=10090 GN=Esyt1 PE=1 SV=2	[K].LISIIHSCR.[A]	1xCarbamidomethyl [C8]; 1xTMTpro [N-Term]	4.51692e-05	4.83621e-05	1	1	1	3	Q3U7R1 [976-984]	Q3U7R1 1xCarbamidomethyl [C983]	0	1402.82	0.934	0.594109	0.851426	1352.9	1448.4	8.67	37.9	1286.3	1423	1517.1	1264.9	2463.8	1514.1	1045.8	1385.6		High	High	High	High	High	High	High	High	High	n/a	2.13e-05		1.901e-05		30		100
Q8VD75	Huntingtin-interacting protein 1 OS=Mus musculus OX=10090 GN=Hip1 PE=1 SV=2	[R].SVSVTTAGQCR.[L]	1xCarbamidomethyl [C10]; 1xTMTpro [N-Term]	3.15793e-07	4.83621e-05	1	1	1	3	Q8VD75 [211-221]	Q8VD75 1xCarbamidomethyl [C220]	0	1469.77	0.921	0.280324	0.64989	1192.4	1294.6	9.63	12.77	1151.2	1269.9	1016.9	1235	1443.1	1419.6	1180.6	1118.9		High	High	High	High	High	High	High	High	High	Low	2.13e-05	0.7812	2.716e-08	1	58	1.34	100
G3X9X1	Kelch repeat and BTB domain-containing protein 2 OS=Mus musculus OX=10090 GN=Kbtbd2 PE=1 SV=1	[R].LLSFADLFSCEELK.[Q]	1xCarbamidomethyl [C10]; 1xTMTpro [K14]; 1xTMTpro [N-Term]	4.51692e-05	4.83621e-05	1	1	1	2	G3X9X1 [136-149]	G3X9X1 1xCarbamidomethyl [C145]	0	2280.24	0.999	0.497858	0.800451	1043.8	1044.7	4.35	3.12	1049	1032.8	1131.6	1038.6	1022.1	1007.5	1072.6	1067.7		High	High	High	High	High	High	High	High	n/a	High		0.0003185		2.18e-05		4.71	100
Q9ESJ4	NCK-interacting protein with SH3 domain OS=Mus musculus OX=10090 GN=Nckipsd PE=1 SV=2	[R].ILTEEEASPQCQMDR.[M]	1xCarbamidomethyl [C11]; 1xTMTpro [N-Term]	1.44104e-07	4.83621e-05	1	1	1	2	Q9ESJ4 [682-696]	Q9ESJ4 1xCarbamidomethyl [C692]	0	2111.01	0.868	0.122205	0.469	918.5	1058.7	4.01	9.6	941.7	967.3	895.8	890.3	887.3	1061.7	1055.7	1115.6		High	High	High	High	High	High	High	High	High	n/a	2.13e-05		9.732e-09		35		100
Q9R0P3	S-formylglutathione hydrolase OS=Mus musculus OX=10090 GN=Esd PE=1 SV=1	[R].SVSAFAPICNPVLCSWGK.[K]	2xCarbamidomethyl [C9; C14]; 1xTMTpro [K18]; 1xTMTpro [N-Term]	1.42009e-10	4.83621e-05	1	1	1	8	Q9R0P3 [168-185]	Q9R0P3 2xCarbamidomethyl [C176; C181]	0	2601.38	0.952	0.745426	0.915386	4620.5	4855.7	13.19	17.58	4868	4385.6	5546.8	4126.4	3427.7	5103.1	4620.2	5163		High	High	High	High	High	High	High	High	High	Low	2.13e-05	0.7609	1.151e-12	1	103	1.12	100
Q62077	1-phosphatidylinositol 4,5-bisphosphate phosphodiesterase gamma-1 OS=Mus musculus OX=10090 GN=Plcg1 PE=1 SV=2	[R].LLTEYCIETGAPDGSFLVR.[E]	1xCarbamidomethyl [C6]; 1xTMTpro [N-Term]	1.97333e-08	4.83621e-05	1	1	1	2	Q62077 [568-586]	Q62077 1xCarbamidomethyl [C573]	0	2445.27	1.07	0.0140598	0.214247	1390.4	1299	3.07	1.78	1355.9	1428.2	1425.7	1350.2	1311.3	1286.7	1274.9	1326		High	High	High	High	High	High	High	High	High	n/a	2.13e-05		7.235e-10		60		100
Q80TI0	Protein Aster-B OS=Mus musculus OX=10090 GN=Gramd1b PE=1 SV=2	[R].LIVDYSCALQR.[ED]	1xCarbamidomethyl [C7]; 1xTMTpro [N-Term]	9.71041e-07	4.83621e-05	1	2	1	3	Q80TI0 [111-121]	Q80TI0 1xCarbamidomethyl [C117]	0	1641.9	1.113	0.0910379	0.422205	2203.9	1979.9	5.13	6	2042.7	2314.5	2190.1	2217.7	2199.9	2017	1941.7	1943.4		High	High	High	High	High	High	High	High	High	High	2.13e-05	0.0007911	1.179e-07	0.04583	47	1.82	100
Q9DBF1	Alpha-aminoadipic semialdehyde dehydrogenase OS=Mus musculus OX=10090 GN=Aldh7a1 PE=1 SV=4	[K].ILVEGIGEVQEYVDVCDYAAGLSR.[M]	1xCarbamidomethyl [C16]; 1xTMTpro [N-Term]	8.522e-08	4.83621e-05	1	1	1	4	Q9DBF1 [139-162]	Q9DBF1 1xCarbamidomethyl [C154]	0	2959.5	0.931	0.0145574	0.215916	1253.4	1346.7	3.08	2.89	1290.9	1278	1229.2	1210	1373.9	1320	1382.7	1304.6		High	High	High	High	High	High	High	High	High	Low	2.13e-05	0.8787	4.886e-09	1	46	2.57	100
O35963	Ras-related protein Rab-33B OS=Mus musculus OX=10090 GN=Rab33b PE=1 SV=1	[R].ILVGNKCDLR.[S]	1xCarbamidomethyl [C7]; 1xTMTpro [K6]; 1xTMTpro [N-Term]	5.18365e-05	4.83621e-05	1	1	1	3	O35963 [144-153]	O35963 1xCarbamidomethyl [C150]	1	1796.07	0.944	0.180055	0.54746	2201.2	2332.7	11.84	2.78	2262	2218	1728.9	2184.5	2403.4	2325	2340.5	2246		High	High	High	High	High	High	High	High	High	High	2.13e-05	0.0003185	2.299e-05	0.01786	21	2.5	100
P62821	Ras-related protein Rab-1A OS=Mus musculus OX=10090 GN=Rab1A PE=1 SV=3	[K].LLVGNKCDLTTK.[K]	1xCarbamidomethyl [C7]; 2xTMTpro [K6; K12]; 1xTMTpro [N-Term]	4.04668e-08	4.83621e-05	1	1	1	3	P62821 [120-131]	P62821 1xCarbamidomethyl [C126]	1	2274.37	0.877	0.248536	0.619091	2338.8	2667.6	15.16	12.2	2988.7	2279.8	2145.1	2399.4	2503.1	2490.4	3200.6	2843		High	High	High	High	High	High	High	High	High	n/a	2.13e-05		1.848e-09		55		100
Q9D700	Dual specificity protein phosphatase 26 OS=Mus musculus OX=10090 GN=Dusp26 PE=2 SV=2	[K].ILVHCAVGVSR.[S]	1xCarbamidomethyl [C5]; 1xTMTpro [N-Term]	7.2638e-05	4.83621e-05	1	1	1	1	Q9D700 [148-158]	Q9D700 1xCarbamidomethyl [C152]	0	1514.88	1	0.842278	0.95114	327.1	327.2	10.22	15.65	322.1	372.1	290.5	332.2	409.3	338.3	285	316.4		High	High	High	High	High	High	High	High	High	n/a	2.13e-05		3.707e-05		35		100
Q3TBW2	39S ribosomal protein L10, mitochondrial OS=Mus musculus OX=10090 GN=Mrpl10 PE=1 SV=2	[K].SVPFLPLLGGCVDDTILSR.[Q]	1xCarbamidomethyl [C11]; 1xTMTpro [N-Term]	4.20545e-11	4.83621e-05	1	1	1	2	Q3TBW2 [170-188]	Q3TBW2 1xCarbamidomethyl [C180]	0	2363.3	1.045	0.979407	0.994445	1311.5	1254.5	12.54	5.44	1300.3	1359.4	1017.7	1322.8	1299	1305.8	1211.5	1167.2		High	High	High	High	High	High	High	High	High	n/a	2.13e-05		2.341e-13		96		100
P14824	Annexin A6 OS=Mus musculus OX=10090 GN=Anxa6 PE=1 SV=3	[R].LIVNLMRPLAYCDAK.[E]	1xCarbamidomethyl [C12]; 1xTMTpro [K15]; 1xTMTpro [N-Term]	8.70924e-09	4.83621e-05	1	1	1	3	P14824 [85-99]	P14824 1xCarbamidomethyl [C96]	1	2385.36	0.876	0.0488144	0.333044	2161.8	2468.3	10.01	10.97	2229.2	2096.4	1823.6	2304.6	2908.9	2606.8	2337.2	2313		High	High	High	High	High	High	High	High	High	n/a	2.13e-05		2.481e-10		32		100
Q9Z1F9	SUMO-activating enzyme subunit 2 OS=Mus musculus OX=10090 GN=Uba2 PE=1 SV=1	[K].LLVPCALDPPNTNCYVCASKPEVTVR.[L]	3xCarbamidomethyl [C5; C14; C17]; 1xTMTpro [K20]; 1xTMTpro [N-Term]	7.84384e-10	4.83621e-05	1	1	1	2	Q9Z1F9 [426-451]	Q9Z1F9 3xCarbamidomethyl [C430; C439; C442]	1	3581.88	1.081	0.208547	0.579716	1670.5	1545.4	5.6	6.19	1656.4	1686.6	1495.4	1684.8	1412	1557.4	1642.3	1533.5		High	High	High	High	High	High	High	High	High	n/a	2.13e-05		1.074e-11		56		100
Q8VED9	Galectin-related protein OS=Mus musculus OX=10090 GN=Lgalsl PE=1 SV=1	[R].LIVPFCGHIK.[G]	1xCarbamidomethyl [C6]; 1xTMTpro [K10]; 1xTMTpro [N-Term]	3.35265e-07	4.83621e-05	1	1	1	6	Q8VED9 [36-45]	Q8VED9 1xCarbamidomethyl [C41]	0	1792.08	1.27	0.00362452	0.141889	4223.6	3324.9	2.48	7.03	4238.9	4423.8	4208.4	4197.3	3129.6	3450.4	3203.9	3645.3		High	High	High	High	High	High	High	High	High	n/a	2.13e-05		2.94e-08		45		100
B2RXC6	DNA-directed RNA polymerase subunit OS=Mus musculus OX=10090 GN=Polr3a PE=1 SV=1	[R].LLVPPLCIRPSVVSDLK.[S]	1xCarbamidomethyl [C7]; 1xTMTpro [K17]; 1xTMTpro [N-Term]	4.71034e-06	4.83621e-05	1	1	1	2	B2RXC6 [255-271]	B2RXC6 1xCarbamidomethyl [C261]	0	2514.53	1.029	0.283421	0.652148	1623.8	1577.8	3.5	2.18	1653.5	1649.9	1533.2	1598	1583.1	1572.6	1598.6	1519.8		High	High	High	High	High	High	High	High	n/a	High		0.0003185		1.336e-06		3.51	100
Q80TA9	Ectopic P granules protein 5 homolog OS=Mus musculus OX=10090 GN=Epg5 PE=1 SV=2	[R].LLVQSSAEQLLSPECWK.[A]	1xCarbamidomethyl [C15]; 1xTMTpro [K17]; 1xTMTpro [N-Term]	1.65698e-07	4.83621e-05	1	1	1	1	Q80TA9 [1829-1845]	Q80TA9 1xCarbamidomethyl [C1843]	0	2596.43	1.082	0.00922948	0.184288	991.3	915.9	3.07	2.9	1028.4	973.8	962.9	1009.1	890.8	899.3	946.6	932.8		High	High	High	High	High	High	High	High	High	n/a	2.13e-05		1.173e-08		70		100
Q9ES28	Rho guanine nucleotide exchange factor 7 OS=Mus musculus OX=10090 GN=Arhgef7 PE=1 SV=2	[R].ILVSCTSQQDLHEWVEHLQK.[Q]	1xCarbamidomethyl [C5]; 1xTMTpro [K20]; 1xTMTpro [N-Term]	6.82152e-10	4.83621e-05	1	1	1	3	Q9ES28 [535-554]	Q9ES28 1xCarbamidomethyl [C539]	0	3058.63	0.985	0.562963	0.836269	2174.4	2208	4.22	7.36	2048.8	2193	2268.4	2155.9	2048.5	2443.2	2233.4	2182.8		High	High	High	High	High	High	High	High	High	Low	2.13e-05	0.876	8.942e-12	1	77	1.98	100
Q07076	Annexin A7 OS=Mus musculus OX=10090 GN=Anxa7 PE=1 SV=2	[R].LLVSMCQGNR.[D]	1xCarbamidomethyl [C6]; 1xTMTpro [N-Term]	2.44394e-06	4.83621e-05	1	1	1	4	Q07076 [297-306]	Q07076 1xCarbamidomethyl [C302]	0	1481.79	1.084	0.466777	0.782338	3412.1	3147.8	11.51	1.63	3312.4	3623.4	2767.9	3514.7	3148.9	3146.7	3050.3	3159		High	High	High	High	High	High	High	High	High	n/a	2.13e-05		3.956e-07		46		100
Q91VZ6	Stromal membrane-associated protein 1 OS=Mus musculus OX=10090 GN=Smap1 PE=1 SV=1	[K].SVNLDQWTPEQIQCMQDMGNTK.[A]	1xCarbamidomethyl [C14]; 1xTMTpro [K22]; 1xTMTpro [N-Term]	8.53644e-06	4.83621e-05	1	1	1	1	Q91VZ6 [72-93]	Q91VZ6 1xCarbamidomethyl [C85]	0	3231.57	1.053	0.402953	0.743138	473.8	449.9	6.38	2.17	467.7	497.2	426.9	479.9	466	452.7	443.8	447		High	High	High	High	High	High	High	High	High	n/a	2.13e-05		2.043e-06		24		100
P60755	MAM domain-containing glycosylphosphatidylinositol anchor protein 2 OS=Mus musculus OX=10090 GN=Mdga2 PE=1 SV=1	[K].LLVDDPIVVNPGEAITLVCVTTGGEPTPSLTWVR.[S]	1xCarbamidomethyl [C19]; 1xTMTpro [N-Term]	3.74288e-09	4.83621e-05	1	1	1	2	P60755 [246-279]	P60755 1xCarbamidomethyl [C264]	0	3923.12	1.054	0.150719	0.511382	424.8	403	4.03	7.4	413.1	453.6	425.6	424.1	431.5	359.9	401.6	404.3		High	High	High	High	High	High	High	High	High	n/a	2.13e-05		8.242e-11		97		100
A2AT37	Regulator of nonsense transcripts 2 OS=Mus musculus OX=10090 GN=Upf2 PE=1 SV=1	[K].LIVDAFLQQLPNCVNR.[D]	1xCarbamidomethyl [C13]; 1xTMTpro [N-Term]	2.20951e-08	4.83621e-05	1	1	1	1	A2AT37 [564-579]	A2AT37 1xCarbamidomethyl [C576]	0	2204.22	1.044	0.123934	0.471028	880.4	843.5	5.46	4.02	879.5	969.2	859.2	881.3	808.8	880.7	864.5	823		High	High	High	High	High	High	High	High	High	n/a	2.13e-05		8.414e-10		51		100
Q6A0A9	Constitutive coactivator of PPAR-gamma-like protein 1 OS=Mus musculus OX=10090 GN=FAM120A PE=1 SV=2	[R].LLVDADNCLHR.[L]	1xCarbamidomethyl [C8]; 1xTMTpro [N-Term]	6.56088e-07	4.83621e-05	1	1	1	2	Q6A0A9 [46-56]	Q6A0A9 1xCarbamidomethyl [C53]	0	1629.87	1.037	0.895626	0.971783	511.5	493.5	11.3	10.69	489.4	534.6	417.3	536.7	569	506.1	481.1	441.7		High	High	High	High	High	High	High	High	High	Low	2.13e-05	0.9579	7.09e-08	1	90	1.28	100
E9Q735	Ubiquitin conjugation factor E4 A OS=Mus musculus OX=10090 GN=Ube4a PE=1 SV=1	[R].LLTFNPTYCVLK.[D]	1xCarbamidomethyl [C9]; 1xTMTpro [K12]; 1xTMTpro [N-Term]	4.65313e-08	4.83621e-05	1	1	1	2	E9Q735 [457-468]	E9Q735 1xCarbamidomethyl [C465]	0	2077.2	0.621	0.319947	0.684999	1619.6	2607.6	22.8	33.72	1749.3	1499.4	2137.4	1250.7	1124.1	2704	2690.5	2527.3		High	High	High	High	High	High	High	High	High	n/a	2.13e-05		2.231e-09		61		100
Q9D7N3	28S ribosomal protein S9, mitochondrial OS=Mus musculus OX=10090 GN=Mrps9 PE=1 SV=3	[K].LLTLPCGPAEEEFVQR.[F]	1xCarbamidomethyl [C6]; 1xTMTpro [N-Term]	1.57215e-05	4.83621e-05	1	1	1	2	Q9D7N3 [222-237]	Q9D7N3 1xCarbamidomethyl [C227]	0	2163.14	1.022	0.779886	0.929647	771.1	754.3	5.53	4.25	723.4	785.5	756.9	824	809.9	765	743.7	738.4		High	High	High	High	High	High	High	High	High	n/a	2.13e-05		9.466e-06		42		100
Q14BI2	Metabotropic glutamate receptor 2 OS=Mus musculus OX=10090 GN=Grm2 PE=1 SV=2	[K].SVQPGEVCCWLCIPCQPYEYR.[L]	4xCarbamidomethyl [C8; C9; C12; C15]; 1xTMTpro [N-Term]	2.1475e-07	4.83621e-05	1	1	1	1	Q14BI2 [511-531]	Q14BI2 4xCarbamidomethyl [C518; C519; C522; C525]	0	3005.37	1.055	0.448422	0.770634	520.8	493.7	2.69	9.91	519.4	532.2	498.9	522.3	456	454.2	545.9	534.4		High	High	High	High	High	High	High	High	High	n/a	2.13e-05		1.635e-08		38		100
Q8R151	NFX1-type zinc finger-containing protein 1 OS=Mus musculus OX=10090 GN=Znfx1 PE=1 SV=3	[R].IITPMCSASGIVYK.[V]	1xCarbamidomethyl [C6]; 1xTMTpro [K14]; 1xTMTpro [N-Term]	4.40861e-06	4.83621e-05	1	1	1	1	Q8R151 [409-422]	Q8R151 1xCarbamidomethyl [C414]	0	2148.21	1.008	0.857703	0.956188	652.3	647.1	5.67	5.44	645.6	616.6	705.9	659.1	699.6	613.9	649.1	645.1		High	High	High	High	High	High	High	High	High	n/a	2.13e-05		8.559e-07		43		100
Q8BPN8	DmX-like protein 2 OS=Mus musculus OX=10090 GN=Dmxl2 PE=1 SV=3	[K].SVQACLAK.[A]	1xCarbamidomethyl [C5]; 1xTMTpro [K8]; 1xTMTpro [N-Term]	7.44082e-05	4.83621e-05	1	1	1	3	Q8BPN8 [917-924]	Q8BPN8 1xCarbamidomethyl [C921]	0	1484.88	0.823	0.0114915	0.199625	1671.4	2031.2	7.72	3.77	1853.7	1542.7	1700.8	1642.5	1902.1	2021.7	2040.6	2077.3		High	High	High	High	High	High	High	High	High	n/a	2.13e-05		3.843e-05		35		100
Q64455	Receptor-type tyrosine-protein phosphatase eta OS=Mus musculus OX=10090 GN=Ptprj PE=1 SV=2	[K].ILTQVGDGTTSLVPGWNLFCTEPEPVTSFHCEVVPK.[E]	2xCarbamidomethyl [C20; C31]; 1xTMTpro [K36]; 1xTMTpro [N-Term]	2.47828e-09	4.83621e-05	1	1	1	1	Q64455 [598-633]	Q64455 2xCarbamidomethyl [C617; C628]	0	4623.38	1.09	0.201356	0.57277	340.6	312.6	6.74	5.63	350.3	331.2	307.7	358.8	298.4	311.3	340.8	313.8		High	High	High	High	High	High	High	High	High	n/a	2.13e-05		4.824e-11		48		100
Q5ND34	WD repeat-containing protein 81 OS=Mus musculus OX=10090 GN=Wdr81 PE=1 SV=2	[R].LLTSCYVGPTR.[Q]	1xCarbamidomethyl [C5]; 1xTMTpro [N-Term]	0.000106345	4.83621e-05	1	1	1	1	Q5ND34 [1245-1255]	Q5ND34 1xCarbamidomethyl [C1249]	0	1570.86	0.997	0.788382	0.932204	1771.4	1777.4	7.03	4.37	1681.6	1866.1	1671.5	1915.6	1738.8	1916.7	1787.9	1766.9		High	High	High	High	High	High	High	High	n/a	High		0.0003185		0.009121		2.66	100
Q9D7X1	BTB/POZ domain-containing protein KCTD4 OS=Mus musculus OX=10090 GN=Kctd4 PE=1 SV=1	[R].LLTSLDCSK.[G]	1xCarbamidomethyl [C7]; 1xTMTpro [K9]; 1xTMTpro [N-Term]	3.31014e-05	4.83621e-05	1	1	1	2	Q9D7X1 [238-246]	Q9D7X1 1xCarbamidomethyl [C244]	0	1644.95	0.992	0.991691	0.997457	687.5	693.4	15.92	14.62	800.5	689.4	537.3	685.6	757.5	555.5	635.3	756.8		High	High	High	High	High	High	High	High	High	n/a	2.13e-05		1.244e-05		30		100
Q8BGG7	Ubiquitin-associated and SH3 domain-containing protein B OS=Mus musculus OX=10090 GN=Ubash3b PE=1 SV=1	[R].SVQAACDWLFSHVGDPFLDDPLPR.[E]	1xCarbamidomethyl [C6]; 1xTMTpro [N-Term]	4.99052e-10	4.83621e-05	1	1	1	2	Q8BGG7 [54-77]	Q8BGG7 1xCarbamidomethyl [C59]	0	3046.51	1.032	0.37021	0.7216	1082.8	1049.6	4.62	3.65	1016.3	1135.9	1094.3	1071.3	1073.7	1087.5	1026	1006.9		High	High	High	High	High	High	High	High	High	n/a	2.13e-05		5.912e-12		73		100
Q91W50	Cold shock domain-containing protein E1 OS=Mus musculus OX=10090 GN=Csde1 PE=1 SV=1	[K].LLTSYGFIQCSER.[Q]	1xCarbamidomethyl [C10]; 1xTMTpro [N-Term]	4.6436e-07	4.83621e-05	1	1	1	4	Q91W50 [33-45]	Q91W50 1xCarbamidomethyl [C42]	0	1877.98	0.978	0.776754	0.928791	2890.6	2955.4	9.25	4.81	2906.6	3169.1	2523	2874.8	3017.4	2952.2	2702.4	2958.5		High	High	High	High	High	High	High	High	High	n/a	2.13e-05		4.491e-08		51		100
Q8BML1	[F-actin]-monooxygenase MICAL2 OS=Mus musculus OX=10090 GN=Mical2 PE=1 SV=2	[K].LLTWCQQQTK.[G]	1xCarbamidomethyl [C5]; 1xTMTpro [K10]; 1xTMTpro [N-Term]	9.11785e-06	4.83621e-05	1	1	1	1	Q8BML1 [522-531]	Q8BML1 1xCarbamidomethyl [C526]	0	1914.08	0.783	0.624925	0.865822	372.3	475.5	12.05	24.43	347.1	382.7	452.3	362.2	477	271.8	473.9	490.8		High	High	High	High	High	High	High	High	High	n/a	2.13e-05		2.219e-06		25		100
Q8BGU5	Cyclin-Y OS=Mus musculus OX=10090 GN=Ccny PE=1 SV=1	[R].LLTYAEIDICPANWK.[R]	1xCarbamidomethyl [C10]; 1xTMTpro [K15]; 1xTMTpro [N-Term]	2.36875e-05	4.83621e-05	1	1	1	1	Q8BGU5 [199-213]	Q8BGU5 1xCarbamidomethyl [C208]	0	2415.32	1.079	0.130119	0.482666	607.8	563.5	12.7	0.53	614.3	592	764.9	601.3	562.6	563.8	563.1	569.1		High	High	High	High	High	High	High	High	High	n/a	2.13e-05		7.885e-06		30		100
Q6A026; Q4VA53	Sister chromatid cohesion protein PDS5 homolog A OS=Mus musculus OX=10090 GN=Pds5a PE=1 SV=3 Sister chromatid cohesion protein PDS5 homolog B OS=Mus musculus OX=10090 GN=Pds5b PE=1 SV=1	[R].LLVACCLADIFR.[I]	2xCarbamidomethyl [C5; C6]; 1xTMTpro [N-Term]	3.17899e-07	4.83621e-05	2	2	1	2	Q6A026 [87-98]; Q4VA53 [78-89]	Q6A026 2xCarbamidomethyl [C91; C92]; Q4VA53 2xCarbamidomethyl [C82; C83]	0	1754.96	1.209	0.241324	0.61172	1256	1039.3	11.11	17.58	1020.3	1226.1	1321.4	1286.7	1159	1277.6	883.3	932	Shared	High	High	High	High	High	High	High	High	High	n/a	2.13e-05		2.735e-08		41		100
A2AGT5	Cytoskeleton-associated protein 5 OS=Mus musculus OX=10090 GN=Ckap5 PE=1 SV=1	[K].IIVACIETLR.[K]	1xCarbamidomethyl [C5]; 1xTMTpro [N-Term]	5.16757e-06	4.83621e-05	1	1	1	3	A2AGT5 [140-149]	A2AGT5 1xCarbamidomethyl [C144]	0	1491.89	0.904	0.536265	0.821694	2054.8	2273.5	17.93	13.07	1776.3	2023.7	2682.2	2086.4	2437.5	2628.9	1968.8	2120.5		High	High	High	High	High	High	High	High	High	n/a	2.13e-05		1.057e-06		43		100
A2AGT5	Cytoskeleton-associated protein 5 OS=Mus musculus OX=10090 GN=Ckap5 PE=1 SV=1	[K].IIVACIETLRK.[A]	1xCarbamidomethyl [C5]; 1xTMTpro [K11]; 1xTMTpro [N-Term]	1.01727e-06	4.83621e-05	1	1	1	2	A2AGT5 [140-150]	A2AGT5 1xCarbamidomethyl [C144]	1	1924.19	0.687	0.0712995	0.383553	1440.7	2095.7	24.47	9.46	1437.6	1430.5	2238.8	1443.9	2134.6	2451.5	1989.5	2057.6		High	High	High	High	High	High	High	High	High	n/a	2.13e-05		1.251e-07		29		100
Q148V7	RAB11-binding protein RELCH OS=Mus musculus OX=10090 GN=Relch PE=1 SV=1	[R].LLVAESCGALAPYLPK.[E]	1xCarbamidomethyl [C7]; 1xTMTpro [K16]; 1xTMTpro [N-Term]	1.4341e-08	4.83621e-05	1	1	1	5	Q148V7 [618-633]	Q148V7 1xCarbamidomethyl [C624]	0	2310.34	0.941	0.721778	0.9064	2035.9	2163.4	2.39	10.37	2022.7	2049.3	1986.4	2102.3	1780.2	2118.9	2264.9	2208.8		High	High	High	High	High	High	High	High	High	n/a	2.13e-05		4.791e-10		62		100
D3YXJ0	Diacylglycerol kinase eta OS=Mus musculus OX=10090 GN=Dgkh PE=1 SV=2	[R].ILVCGGDGSVGWVLSEIDK.[L]	1xCarbamidomethyl [C4]; 1xTMTpro [K19]; 1xTMTpro [N-Term]	2.18413e-09	4.83621e-05	1	1	1	1	D3YXJ0 [382-400]	D3YXJ0 1xCarbamidomethyl [C385]	0	2612.42	0.914	0.263197	0.632249	664.5	726.7	5.73	9.94	707.8	656.5	616.1	672.6	621.2	742.7	790.2	711.1		High	High	High	High	High	High	High	High	High	n/a	2.13e-05		4.089e-11		81		100
O35657	Sialidase-1 OS=Mus musculus OX=10090 GN=Neu1 PE=1 SV=1	[R].LIVCGHGTLER.[D]	1xCarbamidomethyl [C4]; 1xTMTpro [N-Term]	2.30818e-05	4.83621e-05	1	1	1	3	O35657 [209-219]	O35657 1xCarbamidomethyl [C212]	0	1558.87	1.283	0.00689886	0.167859	744.7	580.5	9.24	10.31	713.1	871.7	732.5	757	641.6	626.9	537.7	524.6		High	High	High	High	High	High	High	High	High	n/a	2.13e-05		7.639e-06		38		100
Q6ZWR6	Nesprin-1 OS=Mus musculus OX=10090 GN=Syne1 PE=1 SV=2	[K].IIVCSKEEIQQLLGK.[H]	1xCarbamidomethyl [C4]; 2xTMTpro [K6; K15]; 1xTMTpro [N-Term]	3.14309e-08	4.83621e-05	1	1	1	1	Q6ZWR6 [6618-6632]	Q6ZWR6 1xCarbamidomethyl [C6621]	1	2670.6	1.063	0.303421	0.670041	1532.2	1441.5	5.14	8.48	1520.3	1544.3	1485.4	1669.1	1431.6	1650.7	1451.5	1358.6		High	High	High	High	High	High	High	High	High	n/a	2.13e-05		1.335e-09		22		100
Q3UH45	Tectonin beta-propeller repeat containing 2 OS=Mus musculus OX=10090 GN=Tecpr2 PE=1 SV=1	[K].LLSCFDDLVAAGTASGR.[V]	1xCarbamidomethyl [C4]; 1xTMTpro [N-Term]	5.97681e-06	4.83621e-05	1	1	1	2	Q3UH45 [84-100]	Q3UH45 1xCarbamidomethyl [C87]	0	2057.07	1.072	0.0448013	0.322349	1162.1	1084.3	4.44	3.42	1093.1	1218.8	1161.7	1162.6	1081.7	1087	1027	1115.1		High	High	High	High	High	High	High	High	n/a	High		0.0003185		1.782e-06		4.82	100
P97819	85/88 kDa calcium-independent phospholipase A2 OS=Mus musculus OX=10090 GN=Pla2g6 PE=1 SV=3	[R].IISCANSTENEEGCTPLHLACR.[K]	3xCarbamidomethyl [C4; C14; C21]; 1xTMTpro [N-Term]	3.04128e-12	4.83621e-05	1	1	1	1	P97819 [140-161]	P97819 3xCarbamidomethyl [C143; C153; C160]	0	2836.33	1.027	0.677775	0.8894	351.3	342.2	6.62	4.48	333	384.2	339.3	363.8	371.9	343.3	341	338.4		High	High	High	High	High	High	High	High	High	n/a	2.13e-05		7.527e-15		104		100
Q6P5D3	Putative ATP-dependent RNA helicase DHX57 OS=Mus musculus OX=10090 GN=Dhx57 PE=1 SV=2	[K].LISAVLCAALYPNVVQVK.[T]	1xCarbamidomethyl [C7]; 1xTMTpro [K18]; 1xTMTpro [N-Term]	1.11187e-07	4.83621e-05	1	1	1	1	Q6P5D3 [1214-1231]	Q6P5D3 1xCarbamidomethyl [C1220]	0	2566.53	1.041	0.844138	0.951281	660.1	634.1	10.18	3.19	678	666.8	538.6	653.5	640	621.4	667.7	628.2		High	High	High	High	High	High	High	High	High	n/a	2.13e-05		6.96e-09		49		100
Q4U2R1	E3 ubiquitin-protein ligase HERC2 OS=Mus musculus OX=10090 GN=Herc2 PE=1 SV=3	[K].SVVDVCRVVYQAK.[C]	1xCarbamidomethyl [C6]; 1xTMTpro [K13]; 1xTMTpro [N-Term]	2.60987e-05	4.83621e-05	1	1	1	1	Q4U2R1 [1477-1489]	Q4U2R1 1xCarbamidomethyl [C1482]	1	2131.22	1.022	0.655689	0.880661	1693.8	1657.1	6.22	6.15	1704.8	1682.9	1509	1741.3	1479.2	1705.8	1649.8	1664.4		High	High	High	High	High	High	High	High	High	n/a	2.13e-05		9.004e-06		22		100
Q9WUP4	Polyprenol reductase OS=Mus musculus OX=10090 GN=Srd5a3 PE=1 SV=2	[R].LLPSCALFQDLLR.[Y]	1xCarbamidomethyl [C5]; 1xTMTpro [N-Term]	1.08991e-07	4.83621e-05	1	1	1	2	Q9WUP4 [39-51]	Q9WUP4 1xCarbamidomethyl [C43]	0	1850.05	1.128	0.79302	0.933964	1311.4	1162.9	11.31	18.37	1226.8	1401.9	1106.6	1405.3	1601	1167.1	1158.8	1102.4		High	High	High	High	High	High	High	High	High	n/a	2.13e-05		6.775e-09		53		100
Q8BX57	PX domain-containing protein kinase-like protein OS=Mus musculus OX=10090 GN=Pxk PE=1 SV=2	[K].LLPSCVHPYIYR.[V]	1xCarbamidomethyl [C5]; 1xTMTpro [N-Term]	8.25966e-06	4.83621e-05	1	1	1	1	Q8BX57 [200-211]	Q8BX57 1xCarbamidomethyl [C204]	0	1822	1.077	0.501725	0.801872	336.2	312.1	13.15	7.59	323.5	390.9	285.5	349.4	322.3	350	302.3	296.7		High	High	High	High	High	High	High	High	High	n/a	2.13e-05		1.947e-06		60		100
A3KGS3	Ral GTPase-activating protein subunit alpha-2 OS=Mus musculus OX=10090 GN=Ralgapa2 PE=1 SV=2	[K].LLPSLICATCINASR.[A]	2xCarbamidomethyl [C7; C10]; 1xTMTpro [N-Term]	0.000114419	4.83621e-05	1	1	1	1	A3KGS3 [1805-1819]	A3KGS3 2xCarbamidomethyl [C1811; C1814]	0	1993.09	1.038	0.238423	0.608326	254.5	245.3	5.78	1.93	244.2	265	244.4	273.6	251.9	246.6	240.7	244		High	High	High	High	High	High	High	High	High	n/a	2.13e-05		7.311e-05		44		100
Q80V94	AP-4 complex subunit epsilon-1 OS=Mus musculus OX=10090 GN=Ap4e1 PE=1 SV=3	[K].LLPSTPCVLHCR.[V]	2xCarbamidomethyl [C7; C11]; 1xTMTpro [N-Term]	3.31014e-05	4.83621e-05	1	1	1	1	Q80V94 [1079-1090]	Q80V94 2xCarbamidomethyl [C1085; C1089]	0	1756.95	1.151	0.142163	0.500157	354.9	308.4	11.59	6.22	348.8	398.6	299.7	361	305.3	311.6	291.6	337.8		High	High	High	High	High	High	High	High	High	Low	2.13e-05	0.9044	1.241e-05	1	61	1.36	100
Q8BLQ9	Cell adhesion molecule 2 OS=Mus musculus OX=10090 GN=Cadm2 PE=1 SV=2	[K].IIPSTPFPQEGQALTLTCESK.[G]	1xCarbamidomethyl [C18]; 1xTMTpro [K21]; 1xTMTpro [N-Term]	1.48975e-07	4.83621e-05	1	1	1	14	Q8BLQ9 [231-251]	Q8BLQ9 1xCarbamidomethyl [C248]	0	2925.59	0.914	0.314127	0.679827	13954.6	15269.1	7.04	14.44	14400.2	13522.9	12993.5	15239	13267.7	13940.1	17962.9	16724.8		High	High	High	High	High	High	High	High	High	n/a	2.13e-05		1.015e-08		86		100
Q62261	Spectrin beta chain, non-erythrocytic 1 OS=Mus musculus OX=10090 GN=Sptbn1 PE=1 SV=2	[R].SWHNVYCVINNQEMGFYK.[D]	1xCarbamidomethyl [C7]; 1xTMTpro [K18]; 1xTMTpro [N-Term]	1.11387e-08	4.83621e-05	1	1	1	4	Q62261 [2220-2237]	Q62261 1xCarbamidomethyl [C2226]	0	2897.44	1.056	0.736573	0.912753	4032.5	3819.4	12.74	12.66	4600.1	3981.2	4084.5	3356.6	3354.7	3950.3	3692.8	4518.2		High	High	High	High	High	High	High	High	High	n/a	2.13e-05		3.43e-10		69		100
P61979	Heterogeneous nuclear ribonucleoprotein K OS=Mus musculus OX=10090 GN=Hnrnpk PE=1 SV=1	[K].IIPTLEEGLQLPSPTATSQLPLESDAVECLNYQHYK.[G]	1xCarbamidomethyl [C29]; 1xTMTpro [K36]; 1xTMTpro [N-Term]	5.68044e-08	4.83621e-05	1	1	1	2	P61979 [104-139]	P61979 1xCarbamidomethyl [C132]	0	4663.45	0.514	0.00139997	0.110164	1427.2	2774.2	12.14	15.46	1554.2	1320.3	1542.6	1207.4	2020.5	2910.7	2753.6	2795		High	High	High	High	High	High	High	High	High	n/a	2.13e-05		2.896e-09		41		100
Q9EQC5	N-terminal kinase-like protein OS=Mus musculus OX=10090 GN=Scyl1 PE=1 SV=1	[K].ILPVLCGLTVDPEK.[S]	1xCarbamidomethyl [C6]; 1xTMTpro [K14]; 1xTMTpro [N-Term]	6.78257e-07	4.83621e-05	1	1	1	2	Q9EQC5 [507-520]	Q9EQC5 1xCarbamidomethyl [C512]	0	2162.28	0.917	0.229819	0.599729	709.2	773.1	7.02	5.86	789.1	688.7	677.1	730.4	707.9	756.6	810.9	790		High	High	High	High	High	High	High	High	High	n/a	2.13e-05		7.408e-08		36		100
Q80TV8	CLIP-associating protein 1 OS=Mus musculus OX=10090 GN=Clasp1 PE=1 SV=2	[R].LIPVITSNCTSK.[S]	1xCarbamidomethyl [C9]; 1xTMTpro [K12]; 1xTMTpro [N-Term]	2.45291e-07	4.83621e-05	1	1	1	3	Q80TV8 [445-456]	Q80TV8 1xCarbamidomethyl [C453]	0	1941.13	0.896	0.0179529	0.235442	2142.7	2392.6	5.73	3.58	2045.8	2033.9	2244.1	2260.6	2526.7	2328.2	2365.9	2419.6		High	High	High	High	High	High	High	High	High	n/a	2.13e-05		1.961e-08		73		100
Q9Z1B3	1-phosphatidylinositol 4,5-bisphosphate phosphodiesterase beta-1 OS=Mus musculus OX=10090 GN=Plcb1 PE=1 SV=2	[R].ILPVQAIRPGYHYICLR.[N]	1xCarbamidomethyl [C15]; 1xTMTpro [N-Term]	2.12157e-05	4.83621e-05	1	1	1	3	Q9Z1B3 [761-777]	Q9Z1B3 1xCarbamidomethyl [C775]	1	2373.35	1.069	0.512275	0.807871	983.8	920.5	8.46	4.32	851.1	1039.1	1003.7	964.3	895.6	901.4	982.2	940.1		High	High	High	High	High	High	High	High	High	n/a	2.13e-05		6.802e-06		34		100
Q8CIQ7	Dedicator of cytokinesis protein 3 OS=Mus musculus OX=10090 GN=Dock3 PE=1 SV=1	[K].SWEFGIPLCR.[E]	1xCarbamidomethyl [C9]; 1xTMTpro [N-Term]	8.38358e-05	4.83621e-05	1	1	1	2	Q8CIQ7 [1303-1312]	Q8CIQ7 1xCarbamidomethyl [C1311]	0	1568.82	0.986	0.547314	0.828029	1842.4	1868.5	4.9	2.61	1829.6	1923.9	1708.9	1855.3	1881.7	1797.8	1912.5	1855.4		High	High	High	High	High	High	High	High	High	n/a	2.13e-05		4.579e-05		40		100
Q61361	Brevican core protein OS=Mus musculus OX=10090 GN=Bcan PE=1 SV=2	[R].SWEEAESQCRALGAHLTSICTPEEQDFVNDR.[Y]	2xCarbamidomethyl [C9; C20]; 1xTMTpro [N-Term]	9.48206e-12	4.83621e-05	1	1	1	1	Q61361 [684-714]	Q61361 2xCarbamidomethyl [C692; C703]	1	3939.82	1.252	0.448709	0.770819	607	484.9	26.71	8.45	683.1	661.1	353.4	557.3	473.7	425	519.8	496.4		High	High	High	High	High	High	High	High	High	n/a	2.13e-05		3.348e-14		53		100
Q6P5D8	Structural maintenance of chromosomes flexible hinge domain-containing protein 1 OS=Mus musculus OX=10090 GN=Smchd1 PE=1 SV=2	[R].LIPYTSVGDFDWCAPPK.[K]	1xCarbamidomethyl [C13]; 1xTMTpro [K17]; 1xTMTpro [N-Term]	5.24859e-05	4.83621e-05	1	1	1	1	Q6P5D8 [480-496]	Q6P5D8 1xCarbamidomethyl [C492]	0	2574.36	1.036	0.585778	0.8475	706.6	682	7.45	3.24	653.9	744.8	670.4	759.3	670.9	682.1	721.7	681.9		High	High	High	High	High	High	High	High	High	n/a	2.13e-05		2.346e-05		27		100
Q9D5J6	Sedoheptulokinase OS=Mus musculus OX=10090 GN=Shpk PE=1 SV=1	[R].IIQALNECLDALPR.[Q]	1xCarbamidomethyl [C8]; 1xTMTpro [N-Term]	5.65277e-09	4.83621e-05	1	1	1	2	Q9D5J6 [63-76]	Q9D5J6 1xCarbamidomethyl [C70]	0	1930.08	1.144	0.0265852	0.268304	1429.7	1249.6	6.82	1.01	1319.7	1433.5	1558.8	1426	1265.3	1252	1234.9	1247.2		High	High	High	High	High	High	High	High	High	Low	2.13e-05	0.9689	1.42e-10	1	61	0.95	100
P11881	Inositol 1,4,5-trisphosphate receptor type 1 OS=Mus musculus OX=10090 GN=Itpr1 PE=1 SV=2	[K].LLQAPFTDCGDGPMLR.[L]	1xCarbamidomethyl [C9]; 1xTMTpro [N-Term]	6.64867e-07	4.83621e-05	1	1	1	1	P11881 [522-537]	P11881 1xCarbamidomethyl [C530]	0	2095.06	1.048	0.677437	0.889244	225.4	215.1	17.91	36.35	210.5	249.1	163.8	241.4	219.9	370.9	210.4	169.6		High	High	High	High	High	High	High	High	High	n/a	2.13e-05		7.162e-08		69		100
Q91X97	Neurocalcin-delta OS=Mus musculus OX=10090 GN=Ncald PE=1 SV=4	[R].LLQCDPSSAGQF.[-]	1xCarbamidomethyl [C4]; 1xTMTpro [N-Term]	3.61943e-05	4.83621e-05	1	1	1	5	Q91X97 [182-193]	Q91X97 1xCarbamidomethyl [C185]	0	1626.81	0.888	0.179015	0.545974	1268	1428	8.8	9.66	1303	1440.3	1177.5	1234.1	1253.9	1402.9	1587	1453.5		High	High	High	High	High	High	High	High	High	n/a	2.13e-05		1.399e-05		68		100
P84075; P62748	Neuron-specific calcium-binding protein hippocalcin OS=Mus musculus OX=10090 GN=Hpca PE=1 SV=2 Hippocalcin-like protein 1 OS=Mus musculus OX=10090 GN=Hpcal1 PE=1 SV=2	[R].LLQCDPSSASQF.[-]	1xCarbamidomethyl [C4]; 1xTMTpro [N-Term]	0.000105743	4.83621e-05	2	2	1	6	P84075 [182-193]; P62748 [182-193]	P84075 1xCarbamidomethyl [C185]; P62748 1xCarbamidomethyl [C185]	0	1656.82	0.985	0.624444	0.865778	2083.5	2115.7	6.69	4.68	2046.1	2273.1	1940	2121.6	2044.5	2143.3	2275.3	2088.4	Shared	High	High	High	High	High	High	High	High	High	Low	2.13e-05	0.4357	6.487e-05	0.8735	55	2.77	100
Q61361	Brevican core protein OS=Mus musculus OX=10090 GN=Bcan PE=1 SV=2	[R].SWEEAESQCR.[A]	1xCarbamidomethyl [C9]; 1xTMTpro [N-Term]	8.67323e-07	4.83621e-05	1	1	1	4	Q61361 [684-693]	Q61361 1xCarbamidomethyl [C692]	0	1585.72	1.095	0.0136855	0.213342	2462.4	2249.5	1.31	4.19	2424.1	2439.8	2485.2	2487.8	2305.7	2089.8	2241.4	2257.5		High	High	High	High	High	High	High	High	High	High	2.13e-05	0.008702	1.016e-07	0.2125	46	1.99	100
Q8C052	Microtubule-associated protein 1S OS=Mus musculus OX=10090 GN=Map1s PE=1 SV=2	[R].SWEDVDPAVCSLDEQLK.[A]	1xCarbamidomethyl [C10]; 1xTMTpro [K17]; 1xTMTpro [N-Term]	1.86173e-06	4.83621e-05	1	1	1	1	Q8C052 [45-61]	Q8C052 1xCarbamidomethyl [C54]	0	2599.32	0.969	0.89333	0.971073	545.7	563	7.33	5.25	555.5	526.8	617.8	536.1	553.7	514.5	572.5	579.6		High	High	High	High	High	High	High	High	High	n/a	2.13e-05		2.762e-07		37		100
P14873	Microtubule-associated protein 1B OS=Mus musculus OX=10090 GN=Map1b PE=1 SV=2	[R].SWDTNLIECNLDQELK.[L]	1xCarbamidomethyl [C9]; 1xTMTpro [K16]; 1xTMTpro [N-Term]	7.32644e-09	4.83621e-05	1	1	1	6	P14873 [65-80]	P14873 1xCarbamidomethyl [C73]	0	2586.34	0.935	0.624572	0.865809	4087.7	4370.3	45.47	11.4	4046.3	3657.6	8563.3	4129.5	3691.1	4793.2	4153.6	4598.3		High	High	High	High	High	High	High	High	High	Low	2.13e-05	0.5883	1.978e-10	0.9635	59	1.13	100
E9PVA8	eIF-2-alpha kinase activator GCN1 OS=Mus musculus OX=10090 GN=Gcn1 PE=1 SV=1	[K].SWCQEELPVAVR.[R]	1xCarbamidomethyl [C3]; 1xTMTpro [N-Term]	0.000103362	4.83621e-05	1	1	1	1	E9PVA8 [937-948]	E9PVA8 1xCarbamidomethyl [C939]	0	1777.92	1.062	0.667984	0.88442	850.3	800.8	7.06	3.82	830	871.1	747	871.7	794.1	793	858.9	807.6		High	High	High	High	High	High	High	High	High	n/a	2.13e-05		6.282e-05		27		100
Q9DCL9	Bifunctional phosphoribosylaminoimidazole carboxylase/phosphoribosylaminoimidazole succinocarboxamide synthetase OS=Mus musculus OX=10090 GN=Paics PE=1 SV=4	[K].SWLPQDCTLVDMK.[I]	1xCarbamidomethyl [C7]; 1xTMTpro [K13]; 1xTMTpro [N-Term]	4.11992e-07	4.83621e-05	1	1	1	2	Q9DCL9 [179-191]	Q9DCL9 1xCarbamidomethyl [C185]	0	2201.16	0.945	0.602083	0.855328	2154.4	2280	44.47	11.49	2224.7	1992.6	4494.5	2086.4	2592.2	2274.5	1952	2285.6		High	High	High	High	High	High	High	High	High	n/a	2.13e-05		3.853e-08		26		100
Q80TI0	Protein Aster-B OS=Mus musculus OX=10090 GN=Gramd1b PE=1 SV=2	[R].LIPNAIQVCTDSEK.[H]	1xCarbamidomethyl [C9]; 1xTMTpro [K14]; 1xTMTpro [N-Term]	3.48908e-07	4.83621e-05	1	1	1	1	Q80TI0 [167-180]	Q80TI0 1xCarbamidomethyl [C175]	0	2196.22	0.985	0.529386	0.819293	1075.6	1092.2	19.21	2.79	1053.7	1017.2	1499.8	1098	1104.5	1083.3	1038.8	1101.1		High	High	High	High	High	High	High	High	High	n/a	2.13e-05		3.09e-08		44		100
Q91WG7	Diacylglycerol kinase gamma OS=Mus musculus OX=10090 GN=Dgkg PE=1 SV=1	[K].LLPMQVDGEPWMQPQCTIK.[I]	1xCarbamidomethyl [C16]; 1xTMTpro [K19]; 1xTMTpro [N-Term]	1.97333e-08	4.83621e-05	1	1	1	1	Q91WG7 [740-758]	Q91WG7 1xCarbamidomethyl [C755]	0	2879.51	1.102	0.237515	0.607947	533.1	483.8	8.01	4.22	554	537.1	459.5	529.2	492.7	513.4	467.1	475.2		High	High	High	High	High	High	High	High	High	n/a	2.13e-05		7.268e-10		57		100
Q9D035	Sodium/potassium-transporting ATPase subunit beta-1-interacting protein 1 OS=Mus musculus OX=10090 GN=Nkain1 PE=1 SV=2	[R].SWWMENGPGCLVTPVLNSR.[L]	1xCarbamidomethyl [C10]; 1xTMTpro [N-Term]	3.2002e-07	4.83621e-05	1	1	1	1	Q9D035 [106-124]	Q9D035 1xCarbamidomethyl [C115]	0	2507.25	2.629	0.0018006	0.117135	1297.2	493.3	19.3	2.95	1012.3	1277.1	1629	1317.5	494.7	491.9	496.2	465.7		High	High	High	High	High	High	High	High	High	n/a	2.13e-05		2.775e-08		35		100
Q569Z5	Probable ATP-dependent RNA helicase DDX46 OS=Mus musculus OX=10090 GN=Ddx46 PE=1 SV=2	[K].SWVQCGISMK.[I]	1xCarbamidomethyl [C5]; 1xTMTpro [K10]; 1xTMTpro [N-Term]	1.98951e-06	4.83621e-05	1	1	1	2	Q569Z5 [373-382]	Q569Z5 1xCarbamidomethyl [C377]	0	1803.97	0.995	0.945659	0.984953	1508.3	1516.6	7.75	7.54	1565.5	1453.2	1438.7	1695.5	1437.7	1703.7	1482.3	1551.6		High	High	High	High	High	High	High	High	High	n/a	2.13e-05		3.013e-07		58		100
Q60625	Intercellular adhesion molecule 5 OS=Mus musculus OX=10090 GN=Icam5 PE=1 SV=2	[R].SWTWPEGPEQTLHCEAR.[G]	1xCarbamidomethyl [C14]; 1xTMTpro [N-Term]	3.91434e-08	4.83621e-05	1	1	1	3	Q60625 [418-434]	Q60625 1xCarbamidomethyl [C431]	0	2388.14	0.942	0.244553	0.614701	1343	1426.1	8.44	3.94	1357.1	1471.5	1196.6	1329	1448.8	1355.2	1484.5	1403.8		High	High	High	High	High	High	High	High	High	n/a	2.13e-05		1.781e-09		77		100
Q6PDS3	NAD(+) hydrolase SARM1 OS=Mus musculus OX=10090 GN=Sarm1 PE=1 SV=1	[R].ILPCVASWK.[E]	1xCarbamidomethyl [C4]; 1xTMTpro [K9]; 1xTMTpro [N-Term]	4.18791e-05	4.83621e-05	1	1	1	2	Q6PDS3 [405-413]	Q6PDS3 1xCarbamidomethyl [C408]	0	1682	0.895	0.00347415	0.141066	1484.7	1658.2	3.48	2.92	1490.6	1478.8	1430.8	1556.5	1715	1667.4	1598.2	1649		High	High	High	High	High	High	High	High	High	n/a	2.13e-05		1.716e-05		38		100
Q68FG2	Spectrin beta chain OS=Mus musculus OX=10090 GN=Sptbn2 PE=1 SV=1	[R].SWQNVYCVLRR.[G]	1xCarbamidomethyl [C7]; 1xTMTpro [N-Term]	3.02622e-05	4.83621e-05	1	1	1	1	Q68FG2 [2242-2252]	Q68FG2 1xCarbamidomethyl [C2248]	1	1784.95	1.069	0.917864	0.977462	852.1	797.4	20.67	11.71	844.1	880.9	540.1	860.3	656.6	801.1	876.5	793.7		High	High	High	High	High	High	High	High	n/a	High		0.0003185		1.314e-05		4.8	100
P85094	Isochorismatase domain-containing protein 2A OS=Mus musculus OX=10090 GN=Isoc2a PE=1 SV=1	[R].ILPESSILFLCDLQEK.[F]	1xCarbamidomethyl [C11]; 1xTMTpro [K16]; 1xTMTpro [N-Term]	1.25324e-07	4.83621e-05	1	1	1	2	P85094 [11-26]	P85094 1xCarbamidomethyl [C21]	0	2513.42	0.918	0.383409	0.729078	3307.3	3604.2	11.57	7.72	3809.2	3061.6	3572.8	3015.7	3432.5	3848.4	3273.4	3784.4		High	High	High	High	High	High	High	High	High	n/a	2.13e-05		8.147e-09		63		100
Q6ZPE2	Myotubularin-related protein 5 OS=Mus musculus OX=10090 GN=Sbf1 PE=1 SV=2	[R].LLPGEECVLDGLR.[V]	1xCarbamidomethyl [C7]; 1xTMTpro [N-Term]	1.4855e-06	4.83621e-05	1	1	1	1	Q6ZPE2 [889-901]	Q6ZPE2 1xCarbamidomethyl [C895]	0	1774.97	1.424	0.00465002	0.148506	248.8	174.7	11.94	5.55	214.7	261.5	236.8	283.2	181.6	179.2	170.3	160.5		High	High	High	High	High	High	High	High	High	n/a	2.13e-05		2.066e-07		84		100
P17742	Peptidyl-prolyl cis-trans isomerase A OS=Mus musculus OX=10090 GN=Ppia PE=1 SV=2	[R].IIPGFMCQGGDFTR.[H]	1xCarbamidomethyl [C7]; 1xTMTpro [N-Term]	3.53578e-07	4.83621e-05	1	1	1	7	P17742 [56-69]	P17742 1xCarbamidomethyl [C62]	0	1902.95	1.554	0.0319143	0.287214	4701.2	3025.4	18.58	19.91	5703.9	5292.9	3851.7	4175.6	2872.9	2871.9	3186	4255.9		High	High	High	High	High	High	High	High	High	Medium	2.13e-05	0.04705	3.161e-08	0.4019	49	2.06	100
Q8C4W3	Neuritin-like protein OS=Mus musculus OX=10090 GN=Nrn1l PE=2 SV=2	[R].SWNDFHACASR.[V]	1xCarbamidomethyl [C8]; 1xTMTpro [N-Term]	5.93743e-06	4.83621e-05	1	1	1	1	Q8C4W3 [69-79]	Q8C4W3 1xCarbamidomethyl [C76]	0	1654.77	1.784	0.047494	0.329409	1556	872.4	25.32	16.77	935.5	1424.6	1699.4	1723.2	1141.3	893.2	789.7	852.1		High	High	High	High	High	High	High	High	High	n/a	2.13e-05		1.262e-06		37		100
Q8C522	Endonuclease domain-containing 1 protein OS=Mus musculus OX=10090 GN=Endod1 PE=1 SV=2	[K].LLPHKPQLFQDNCGEMEQDTEK.[M]	1xCarbamidomethyl [C13]; 2xTMTpro [K5; K22]; 1xTMTpro [N-Term]	3.63824e-08	4.83621e-05	1	1	1	3	Q8C522 [257-278]	Q8C522 1xCarbamidomethyl [C269]	1	3569.85	1.05	0.821898	0.9438	5433.5	5175.2	7.97	22.91	6036.1	4999.5	5318.7	5550.8	7660.7	5175.3	4837.8	5175.1		High	High	High	High	High	High	High	High	High	High	2.13e-05	0.0003185	1.616e-09	0.0004282	52	4.4	100
O35593	26S proteasome non-ATPase regulatory subunit 14 OS=Mus musculus OX=10090 GN=Psmd14 PE=1 SV=2	[K].SWMEGLTLQDYSEHCK.[H]	1xCarbamidomethyl [C15]; 1xTMTpro [K16]; 1xTMTpro [N-Term]	8.08051e-08	4.83621e-05	1	1	1	1	O35593 [224-239]	O35593 1xCarbamidomethyl [C238]	0	2592.27	0.731	0.150088	0.510458	510.9	698.6	25.71	4.93	527	475.6	790.4	495.4	684.6	742.8	663.3	712.8		High	High	High	High	High	High	High	High	High	n/a	2.13e-05		4.589e-09		22		100
O88327	Alpha-catulin OS=Mus musculus OX=10090 GN=Ctnnal1 PE=1 SV=1	[K].LIPLCHQLQTITK.[T]	1xCarbamidomethyl [C5]; 1xTMTpro [K13]; 1xTMTpro [N-Term]	8.22419e-07	4.83621e-05	1	1	1	1	O88327 [662-674]	O88327 1xCarbamidomethyl [C666]	0	2173.3	0.999	0.996866	0.998857	577.3	578	4.62	14.13	545.4	569.4	608.8	585.4	684.8	585.8	484.4	570.2		High	High	High	High	High	High	High	High	High	n/a	2.13e-05		9.516e-08		44		100
E9Q401	Ryanodine receptor 2 OS=Mus musculus OX=10090 GN=Ryr2 PE=1 SV=1	[R].LLPIGLNICAPGDQELIALAK.[N]	1xCarbamidomethyl [C9]; 1xTMTpro [K21]; 1xTMTpro [N-Term]	2.60912e-08	4.83621e-05	1	1	1	2	E9Q401 [3472-3492]	E9Q401 1xCarbamidomethyl [C3480]	0	2827.66	0.91	0.171708	0.535371	1321.2	1451.8	17.42	10.75	1308.9	1333.7	901.6	1335.2	1270.4	1361.9	1601.2	1547.7		High	High	High	High	High	High	High	High	High	n/a	2.13e-05		1.041e-09		66		100
Q8BRT1	CLIP-associating protein 2 OS=Mus musculus OX=10090 GN=Clasp2 PE=1 SV=1	[R].LIPLITSNCTSK.[S]	1xCarbamidomethyl [C9]; 1xTMTpro [K12]; 1xTMTpro [N-Term]	5.78254e-07	4.83621e-05	1	1	1	6	Q8BRT1 [219-230]	Q8BRT1 1xCarbamidomethyl [C227]	0	1955.15	0.959	0.616192	0.860972	3621.4	3774.6	3.56	7.3	3645.6	3597.3	3413.9	3712.3	3287	3740.4	3884.2	3809.2		High	High	High	High	High	High	High	High	High	Medium	2.13e-05	0.01981	5.999e-08	0.291	53	1.78	100
Q6ZPQ6	Membrane-associated phosphatidylinositol transfer protein 2 OS=Mus musculus OX=10090 GN=Pitpnm2 PE=1 SV=2	[R].LLPIMCAYK.[L]	1xCarbamidomethyl [C6]; 1xTMTpro [K9]; 1xTMTpro [N-Term]	7.39622e-05	4.83621e-05	1	1	1	2	Q6ZPQ6 [184-192]	Q6ZPQ6 1xCarbamidomethyl [C189]	0	1717	0.982	0.742583	0.914204	921	938.3	7.62	2.22	856	911.6	1026.5	930.5	921.7	934.7	971.2	941.8		High	High	High	High	High	High	High	High	High	High	3.58e-05	0.0005594	0.0003771	0.03676	36	1.76	100
Q9JIK9	28S ribosomal protein S34, mitochondrial OS=Mus musculus OX=10090 GN=Mrps34 PE=1 SV=1	[K].SWLWQHDEPCYWR.[L]	1xCarbamidomethyl [C10]; 1xTMTpro [N-Term]	2.04047e-05	4.83621e-05	1	1	1	1	Q9JIK9 [84-96]	Q9JIK9 1xCarbamidomethyl [C93]	0	2167.01	1.086	0.670059	0.884909	821.2	756.4	16.31	7.15	778	955.7	645.4	866.8	850	745.9	767	723.7		High	High	High	High	High	High	High	High	High	n/a	2.13e-05		6.488e-06		41		100
Q61097	Kinase suppressor of Ras 1 OS=Mus musculus OX=10090 GN=Ksr1 PE=1 SV=1	[K].SWLSQVCNVCQK.[S]	2xCarbamidomethyl [C7; C10]; 1xTMTpro [K12]; 1xTMTpro [N-Term]	9.93261e-06	4.83621e-05	1	1	1	1	Q61097 [340-351]	Q61097 2xCarbamidomethyl [C346; C349]	0	2117.11	1.108	0.136117	0.492949	1099.4	992.6	6.67	7.03	1145.3	1089.8	978.2	1109.1	954.2	917.1	1032.5	1069.1		High	High	High	High	High	High	High	High	High	n/a	2.13e-05		2.498e-06		40		100
Q64449	C-type mannose receptor 2 OS=Mus musculus OX=10090 GN=Mrc2 PE=1 SV=3	[K].SWIQALGVCR.[E]	1xCarbamidomethyl [C9]; 1xTMTpro [N-Term]	4.29337e-06	4.83621e-05	1	1	1	1	Q64449 [695-704]	Q64449 1xCarbamidomethyl [C703]	0	1493.82	1.048	0.284803	0.653362	979.1	934	39.42	11.98	906	944.2	1887.6	1015.3	905.6	963.3	754.2	1000.8		High	High	High	High	High	High	High	High	High	n/a	2.13e-05		8.286e-07		49		100
Q923X4	Glutaredoxin-2, mitochondrial OS=Mus musculus OX=10090 GN=Glrx2 PE=1 SV=1	[K].LLPLVHQCYLK.[K]	1xCarbamidomethyl [C8]; 1xTMTpro [K11]; 1xTMTpro [N-Term]	2.86369e-08	4.83621e-05	1	1	1	3	Q923X4 [139-149]	Q923X4 1xCarbamidomethyl [C146]	0	1992.2	1.043	0.324556	0.687695	2206.8	2116.8	3.69	4.89	2202.6	2245.9	2063.4	2211.1	2224.4	2150.4	2083.7	1981.3		High	High	High	High	High	High	High	High	High	n/a	2.13e-05		1.182e-09		66		100
Q8BHE3	Caytaxin OS=Mus musculus OX=10090 GN=Atcay PE=1 SV=1	[R].LIPMEHVQLPDCVLQYEEQR.[L]	1xCarbamidomethyl [C12]; 1xTMTpro [N-Term]	3.21764e-10	4.83621e-05	1	1	1	9	Q8BHE3 [308-327]	Q8BHE3 1xCarbamidomethyl [C319]	0	2801.43	0.977	0.693648	0.895732	3800.2	3888.8	6.95	2.24	3533.7	4077.7	3628.5	3980	3903.3	3874.4	3923.9	3732.7		High	High	High	High	High	High	High	High	High	High	2.13e-05	0.0003185	3.334e-12	0.00636	83	3.86	100
P56481	Gastrin/cholecystokinin type B receptor OS=Mus musculus OX=10090 GN=Cckbr PE=2 SV=1	[R].ILQCMHLWPSER.[V]	1xCarbamidomethyl [C4]; 1xTMTpro [N-Term]	1.1389e-06	4.83621e-05	1	1	1	1	P56481 [202-213]	P56481 1xCarbamidomethyl [C205]	0	1873.97	1.11	0.279201	0.6489	466.1	419.8	13.21	6.21	421.1	515.9	404.8	521.7	403.7	399	453.7	436.4		High	High	High	High	High	High	High	High	High	n/a	2.13e-05		1.458e-07		49		100
Q07076	Annexin A7 OS=Mus musculus OX=10090 GN=Anxa7 PE=1 SV=2	[R].LLVSMCQGNRDER.[Q]	1xCarbamidomethyl [C6]; 1xTMTpro [N-Term]	6.31812e-08	4.83621e-05	1	1	1	2	Q07076 [297-309]	Q07076 1xCarbamidomethyl [C302]	1	1881.96	1.112	0.314879	0.680275	1414.7	1272.2	13.56	3.2	1320	1558.8	1151.6	1516.3	1289	1304.5	1255.6	1213.1		High	High	High	High	High	High	High	High	High	High	2.13e-05	0.0003185	3.315e-09	0.002856	42	3.97	100
P27545	Ceramide synthase 1 OS=Mus musculus OX=10090 GN=Cers1 PE=1 SV=1	[R].SWASALAAAQGCGDCGWGLAR.[R]	2xCarbamidomethyl [C12; C15]; 1xTMTpro [N-Term]	2.62737e-12	4.83621e-05	1	1	1	3	P27545 [26-46]	P27545 2xCarbamidomethyl [C37; C40]	0	2469.17	1.013	0.569326	0.839767	1241.8	1226.1	10.52	15.4	1199.9	1293.4	1021.5	1285.1	1546.8	1276.7	1177.5	1095.6		High	High	High	High	High	High	High	High	High	n/a	2.13e-05		6.224e-15		132		100
P17426	AP-2 complex subunit alpha-1 OS=Mus musculus OX=10090 GN=Ap2a1 PE=1 SV=1	[R].LLQCYPPPEDAAVK.[G]	1xCarbamidomethyl [C4]; 1xTMTpro [K14]; 1xTMTpro [N-Term]	1.61944e-06	4.83621e-05	1	1	1	5	P17426 [264-277]	P17426 1xCarbamidomethyl [C267]	0	2209.22	1.053	0.190087	0.560443	4510.6	4283.3	16.47	14.04	4425.5	4186.1	5943.5	4597.4	3231.3	4258.1	4308.6	4501.9		High	High	High	High	High	High	High	High	High	n/a	2.13e-05		2.314e-07		36		100
Q9JKC8	AP-3 complex subunit mu-1 OS=Mus musculus OX=10090 GN=Ap3m1 PE=1 SV=1	[K].SVVSQSVCDYFFEAQEK.[A]	1xCarbamidomethyl [C8]; 1xTMTpro [K17]; 1xTMTpro [N-Term]	1.3394e-07	4.83621e-05	1	1	1	1	Q9JKC8 [22-38]	Q9JKC8 1xCarbamidomethyl [C29]	0	2631.33	0.964	0.429441	0.760709	463.8	480.9	8.64	4.67	450.9	426.6	521.3	477	469.6	477.1	484.8	521		High	High	High	High	High	High	High	High	High	n/a	2.13e-05		8.867e-09		75		100
Q69ZR2	E3 ubiquitin-protein ligase HECTD1 OS=Mus musculus OX=10090 GN=Hectd1 PE=1 SV=2	[K].ILQQIEEPLALASGALPDWCEQLTSK.[C]	1xCarbamidomethyl [C20]; 1xTMTpro [K26]; 1xTMTpro [N-Term]	5.7004e-10	4.83621e-05	1	1	1	2	Q69ZR2 [2050-2075]	Q69ZR2 1xCarbamidomethyl [C2069]	0	3518.91	0.917	0.00428994	0.146324	812.7	886	1.87	2.93	818.2	834.5	807.2	799.3	920	884.3	887.7	856.5		High	High	High	High	High	High	High	High	High	n/a	2.13e-05		7.082e-12		115		100
Q99LE6	ATP-binding cassette sub-family F member 2 OS=Mus musculus OX=10090 GN=Abcf2 PE=1 SV=1	[R].LIQQVAQEIWVCEK.[Q]	1xCarbamidomethyl [C12]; 1xTMTpro [K14]; 1xTMTpro [N-Term]	1.21226e-07	4.83621e-05	1	1	1	2	Q99LE6 [580-593]	Q99LE6 1xCarbamidomethyl [C591]	0	2352.32	1.003	0.611433	0.858662	2393.2	2386.2	9.7	3.45	2387.6	2398.9	1996.5	2512.8	2479.8	2350.1	2422.8	2291.5		High	High	High	High	High	High	High	High	High	n/a	2.13e-05		7.767e-09		44		100
Q80TM9	Nischarin OS=Mus musculus OX=10090 GN=Nisch PE=1 SV=2	[R].LIQSTSEENQIPSHLPVCPSLQHIAR.[L]	1xCarbamidomethyl [C18]; 1xTMTpro [N-Term]	9.48206e-12	4.83621e-05	1	1	1	1	Q80TM9 [1200-1225]	Q80TM9 1xCarbamidomethyl [C1217]	0	3258.72	1.039	0.650433	0.877987	333.1	320.5	9.61	6.35	375.9	322.9	343.7	299.9	316	307.4	325.2	354.9		High	High	High	High	High	High	High	High	High	n/a	2.13e-05		3.343e-14		75		100
P45377	Aldose reductase-related protein 2 OS=Mus musculus OX=10090 GN=Akr1b8 PE=1 SV=2	[K].LIQYCHSK.[G]	1xCarbamidomethyl [C5]; 1xTMTpro [K8]; 1xTMTpro [N-Term]	1.80312e-05	4.83621e-05	1	1	1	2	P45377 [196-203]	P45377 1xCarbamidomethyl [C200]	0	1656.94	1.106	0.18776	0.557258	1061.4	959.6	10.21	12.74	1008.1	1002.4	1238.8	1117.6	1129	977.7	829.9	941.8		High	High	High	High	High	High	High	High	High	n/a	2.13e-05		5.473e-06		31		100
Q9ESK9	RB1-inducible coiled-coil protein 1 OS=Mus musculus OX=10090 GN=Rb1cc1 PE=1 SV=3	[K].IIQPFMLECHQTIAK.[L]	1xCarbamidomethyl [C9]; 1xTMTpro [K15]; 1xTMTpro [N-Term]	7.46079e-08	4.83621e-05	1	1	1	2	Q9ESK9 [338-352]	Q9ESK9 1xCarbamidomethyl [C346]	0	2437.36	0.916	0.00702256	0.167925	2218.6	2421.2	3.64	2.52	2229.3	2221	2063.6	2216.2	2312.9	2449.8	2417.5	2424.8		High	High	High	High	High	High	High	High	High	High	2.13e-05	0.0003185	4.118e-09	0.01217	49	3.62	100
P17426	AP-2 complex subunit alpha-1 OS=Mus musculus OX=10090 GN=Ap2a1 PE=1 SV=1	[K].LLRLLQCYPPPEDAAVK.[G]	1xCarbamidomethyl [C7]; 1xTMTpro [K17]; 1xTMTpro [N-Term]	1.74214e-06	4.83621e-05	1	1	1	1	P17426 [261-277]	P17426 1xCarbamidomethyl [C267]	1	2591.49	0.986	0.42343	0.757191	721.6	731.7	20.4	8.24	725.4	684.3	1029.1	717.8	626.8	741.8	721.8	757.6		High	High	High	High	High	High	High	High	High	n/a	2.13e-05		2.541e-07		18		100
E9PXF8	Myotubularin-related protein 13 OS=Mus musculus OX=10090 GN=Sbf2 PE=1 SV=1	[K].ILRPALLPGEEIVCEGLR.[V]	1xCarbamidomethyl [C14]; 1xTMTpro [N-Term]	4.28274e-10	4.83621e-05	1	1	1	2	E9PXF8 [871-888]	E9PXF8 1xCarbamidomethyl [C884]	1	2339.34	1.066	0.462913	0.780613	1230.5	1154.5	11.46	12.52	1160	1411.3	1095.3	1305.2	1309.1	1269.3	1027.7	1050.1		High	High	High	High	High	High	High	High	High	n/a	2.13e-05		4.873e-12		37		100
Q8WTY4	Anamorsin OS=Mus musculus OX=10090 GN=Ciapin1 PE=1 SV=1	[R].ILRPGGCLFLK.[E]	1xCarbamidomethyl [C7]; 1xTMTpro [K11]; 1xTMTpro [N-Term]	7.33491e-06	4.83621e-05	1	1	1	1	Q8WTY4 [86-96]	Q8WTY4 1xCarbamidomethyl [C92]	1	1882.16	0.839	0.0598103	0.361342	824.9	983.6	10.25	4.11	859.6	791.6	971.4	782.2	921.7	1017.7	979.1	988		High	High	High	High	High	High	High	High	High	Medium	2.13e-05	0.03385	1.678e-06	0.3573	21	2.52	100
Q8JZP9	GAS2-like protein 1 OS=Mus musculus OX=10090 GN=Gas2l1 PE=1 SV=1	[K].SVVLCLLEVAR.[R]	1xCarbamidomethyl [C5]; 1xTMTpro [N-Term]	1.60872e-06	4.83621e-05	1	1	1	1	Q8JZP9 [135-145]	Q8JZP9 1xCarbamidomethyl [C139]	0	1562.93	0.756	0.00210016	0.12007	790	1044.6	7.68	3.67	782.1	859.4	712.1	798	1022.9	1086	1066.8	1003		High	High	High	High	High	High	High	High	High	n/a	2.13e-05		2.279e-07		49		100
Q6PIC6	Sodium/potassium-transporting ATPase subunit alpha-3 OS=Mus musculus OX=10090 GN=Atp1a3 PE=1 SV=1	[R].IISAHGCK.[V]	1xCarbamidomethyl [C7]; 1xTMTpro [K8]; 1xTMTpro [N-Term]	7.58096e-06	4.83621e-05	1	1	1	16	Q6PIC6 [195-202]	Q6PIC6 1xCarbamidomethyl [C201]	0	1493.88	1.077	0.63286	0.868536	11777.6	10933	12.05	4.55	12570.2	11583.9	9420.8	11974.5	11370.4	11371.8	10505.5	10512.5		High	High	High	High	High	High	High	High	High	High	2.13e-05	0.002132	1.747e-06	0.1064	32	1.49	100
[truncated: 15,964 more rows]

## Sheet: Table S2
Master Protein Accessions	Master Protein Descriptions	Annotated Sequence	Modifications	Qvality PEP	Qvality q-value	# Protein Groups	# Proteins	# Isoforms	# PSMs	Positions in Master Proteins	Modifications in Master Proteins	# Missed Cleavages	Theo. MH+ [Da]	Abundance Ratio: (dbdb) / (WT)	Abundance Ratio P-Value: (dbdb) / (WT)	Abundance Ratio Adj. P-Value: (dbdb) / (WT)	Abundances (Grouped): dbdb	Abundances (Grouped): WT	Abundances (Grouped) CV [%]: dbdb	Abundances (Grouped) CV [%]: WT	Abundances (Normalized): F1: 130N, Sample, dbdb	Abundances (Normalized): F1: 131N, Sample, dbdb	Abundances (Normalized): F1: 132N, Sample, dbdb	Abundances (Normalized): F1: 133N, Sample, dbdb	Abundances (Normalized): F1: 126, Sample, WT	Abundances (Normalized): F1: 127N, Sample, WT	Abundances (Normalized): F1: 128N, Sample, WT	Abundances (Normalized): F1: 129N, Sample, WT	Quan Info	Found in Sample: [S5] F1: 130N, Sample, dbdb	Found in Sample: [S6] F1: 131N, Sample, dbdb	Found in Sample: [S7] F1: 132N, Sample, dbdb	Found in Sample: [S8] F1: 133N, Sample, dbdb	Found in Sample: [S1] F1: 126, Sample, WT	Found in Sample: [S2] F1: 127N, Sample, WT	Found in Sample: [S3] F1: 128N, Sample, WT	Found in Sample: [S4] F1: 129N, Sample, WT	Confidence (by Search Engine): Mascot	Confidence (by Search Engine): Sequest HT	Percolator q-Value (by Search Engine): Mascot	Percolator q-Value (by Search Engine): Sequest HT	Percolator PEP (by Search Engine): Mascot	Percolator PEP (by Search Engine): Sequest HT	Ions Score (by Search Engine): Mascot	XCorr (by Search Engine): Sequest HT	Channel Occupancy [%]	Match
[truncated: 15,432 more rows]
